# Supplementary material for: Associations of plasma protein levels with risk of colorectal cancer: a proteome-wide Mendelian randomization study
Source: Research Square preprint supplement (doi:10.21203/rs.3.rs-6304313/v1), 2025-05-05
Supplement: Supplementary file 1 [file 0bd7b63152d4a6a2a9dce839.xlsx]

## Sheet: FinnGen Olink
SNP	effect_allele.exposure	other_allele.exposure	effect_allele.outcome	other_allele.outcome	beta.exposure	beta.outcome	eaf.exposure	eaf.outcome	remove	palindromic	ambiguous	id.outcome	chr	pos	se.outcome	samplesize.outcome	pval.outcome	outcome	originalname.outcome	outcome.deprecated	mr_keep.outcome	data_source.outcome	se.exposure	samplesize.exposure	pval.exposure	exposure	mr_keep.exposure	pval_origin.exposure	id.exposure	action	mr_keep	R2	F	FMean	F_pow_beta_se
rs3195744	C	T	C	T	0.386518	0.086	0.885996	0.97	FALSE	FALSE	FALSE	ukb-saige-153	11	77925520	0.058	387318	0.14	Colorectal cancer || id:ukb-saige-153	Colorectal cancer	Colorectal cancer || ||	TRUE	MedicineITLab	0.0532286	1732	5.76235e-13	AAMDC	TRUE	reported	finn-pQTL-R10-v1-AAMDC	2	TRUE	0.0301801	53.8364	195.968	52.729
rs66472445	C	T	C	T	-1.08712	-0.081	0.190729	0.11	FALSE	FALSE	FALSE	ukb-saige-153	11	77408426	0.035	387318	0.021	Colorectal cancer || id:ukb-saige-153	Colorectal cancer	Colorectal cancer || ||	TRUE	MedicineITLab	0.0343792	1732	1.38676e-173	AAMDC	TRUE	reported	finn-pQTL-R10-v1-AAMDC	2	TRUE	0.364834	993.699	195.968	999.916
rs143737893	T	C	T	C	-2.08216	-1.3	0.0027408	3.1e-05	FALSE	FALSE	FALSE	ukb-saige-153	17	41113319	3.4	387318	0.7	Colorectal cancer || id:ukb-saige-153	Colorectal cancer	Colorectal cancer || ||	TRUE	MedicineITLab	0.328374	1732	2.90918e-10	AARSD1	TRUE	reported	finn-pQTL-R10-v1-AARSD1	2	TRUE	0.0236997	41.9958	195.968	40.206
rs190682742	T	C	T	C	-1.20313	-0.03	0.0119289	0.012	FALSE	FALSE	FALSE	ukb-saige-153	3	52087012	0.1	387318	0.76	Colorectal cancer || id:ukb-saige-153	Colorectal cancer	Colorectal cancer || ||	TRUE	MedicineITLab	0.151841	1732	4.09638e-15	ABHD14B	TRUE	reported	finn-pQTL-R10-v1-ABHD14B	2	TRUE	0.0341227	61.1178	195.968	62.7837
rs17150482	C	T	C	T	-0.335943	0.0056	0.381755	0.28	FALSE	FALSE	FALSE	ukb-saige-153	9	136194595	0.024	387318	0.81	Colorectal cancer || id:ukb-saige-153	Colorectal cancer	Colorectal cancer || ||	TRUE	MedicineITLab	0.0343286	1732	4.76431e-22	ABO	TRUE	reported	finn-pQTL-R10-v1-ABO	2	TRUE	0.0532729	97.3482	195.968	95.7677
rs535015446	A	G	A	G	0.72688	0.085	0.0311258	0.017	FALSE	FALSE	FALSE	ukb-saige-153	9	136039330	0.089	387318	0.34	Colorectal cancer || id:ukb-saige-153	Colorectal cancer	Colorectal cancer || ||	TRUE	MedicineITLab	0.0983397	1732	2.24905e-13	ABO	TRUE	reported	finn-pQTL-R10-v1-ABO	2	TRUE	0.0318672	56.9449	195.968	54.6346
rs687621	A	G	A	G	-1.21235	-0.022	0.601868	0.68	FALSE	FALSE	FALSE	ukb-saige-153	9	136137065	0.023	387318	0.33	Colorectal cancer || id:ukb-saige-153	Colorectal cancer	Colorectal cancer || ||	TRUE	MedicineITLab	0.0178303	1732	1e-200	ABO	TRUE	reported	finn-pQTL-R10-v1-ABO	2	TRUE	0.704392	4122.34	195.968	4623.16
rs156265	G	C	G	C	-0.241091	-0.032	0.184795	0.14	FALSE	TRUE	FALSE	ukb-saige-153	3	38170810	0.03	387318	0.3	Colorectal cancer || id:ukb-saige-153	Colorectal cancer	Colorectal cancer || ||	TRUE	MedicineITLab	0.0439507	1732	4.73304e-08	ACAA1	TRUE	reported	finn-pQTL-R10-v1-ACAA1	2	TRUE	0.0175125	30.8367	195.968	30.0906
rs4362	C	T	C	T	-0.702516	0.033	0.454391	0.48	FALSE	FALSE	FALSE	ukb-saige-153	17	61573761	0.021	387318	0.12	Colorectal cancer || id:ukb-saige-153	Colorectal cancer	Colorectal cancer || ||	TRUE	MedicineITLab	0.0296864	1732	1.72982e-107	ACE	TRUE	reported	finn-pQTL-R10-v1-ACE	2	TRUE	0.244711	560.514	195.968	560.012
rs62463677	T	C	T	C	0.415529	-0.087	0.0569035	0.057	FALSE	FALSE	FALSE	ukb-saige-153	7	101367057	0.046	387318	0.062	Colorectal cancer || id:ukb-saige-153	Colorectal cancer	Colorectal cancer || ||	TRUE	MedicineITLab	0.0739436	1732	2.22741e-08	ACHE	TRUE	reported	finn-pQTL-R10-v1-ACHE	2	TRUE	0.0185322	32.6661	195.968	31.5792
rs62482549	T	C	T	C	0.409312	-0.0032	0.216592	0.21	FALSE	FALSE	FALSE	ukb-saige-153	7	100517187	0.027	387318	0.9	Colorectal cancer || id:ukb-saige-153	Colorectal cancer	Colorectal cancer || ||	TRUE	MedicineITLab	0.0407134	1732	3.77746e-23	ACHE	TRUE	reported	finn-pQTL-R10-v1-ACHE	2	TRUE	0.0568551	104.289	195.968	101.073
rs78023425	A	G	A	G	-0.519185	0.062	0.144904	0.12	FALSE	FALSE	FALSE	ukb-saige-153	19	11689957	0.033	387318	0.056	Colorectal cancer || id:ukb-saige-153	Colorectal cancer	Colorectal cancer || ||	TRUE	MedicineITLab	0.0466835	1732	8.43529e-28	ACP5	TRUE	reported	finn-pQTL-R10-v1-ACP5	2	TRUE	0.0667989	123.834	195.968	123.685
rs114493965	A	C	A	C	-0.446294	-0.11	0.0474766	0.047	FALSE	FALSE	FALSE	ukb-saige-153	1	147335198	0.052	387318	0.035	Colorectal cancer || id:ukb-saige-153	Colorectal cancer	Colorectal cancer || ||	TRUE	MedicineITLab	0.0801142	1732	2.93657e-08	ACP6	TRUE	reported	finn-pQTL-R10-v1-ACP6	2	TRUE	0.0180147	31.7372	195.968	31.033
rs12119079	A	G	A	G	1.10831	-0.02	0.749037	0.7	FALSE	FALSE	FALSE	ukb-saige-153	1	147129014	0.023	387318	0.38	Colorectal cancer || id:ukb-saige-153	Colorectal cancer	Colorectal cancer || ||	TRUE	MedicineITLab	0.0292086	1732	1e-200	ACP6	TRUE	reported	finn-pQTL-R10-v1-ACP6	2	TRUE	0.461812	1484.49	195.968	1439.8
rs78197611	T	C	T	C	0.677242	0.0092	0.114324	0.083	FALSE	FALSE	FALSE	ukb-saige-153	12	52318624	0.039	387318	0.81	Colorectal cancer || id:ukb-saige-153	Colorectal cancer	Colorectal cancer || ||	TRUE	MedicineITLab	0.0509478	1732	1.83021e-38	ACVRL1	TRUE	reported	finn-pQTL-R10-v1-ACVRL1	2	TRUE	0.0928817	177.138	195.968	176.7
rs150416778	T	C	T	C	-1.38901	0.1	0.0057997	0.02	FALSE	FALSE	FALSE	ukb-saige-153	3	52016836	0.079	387318	0.18	Colorectal cancer || id:ukb-saige-153	Colorectal cancer	Colorectal cancer || ||	TRUE	MedicineITLab	0.222454	1732	5.35353e-10	ACY1	TRUE	reported	finn-pQTL-R10-v1-ACY1	2	TRUE	0.0222495	39.3675	195.968	38.9879
rs12794995	A	G	A	G	0.302205	-0.027	0.210394	0.27	FALSE	FALSE	FALSE	ukb-saige-153	11	67372946	0.024	387318	0.25	Colorectal cancer || id:ukb-saige-153	Colorectal cancer	Colorectal cancer || ||	TRUE	MedicineITLab	0.0413932	1732	4.3411e-13	ACY3	TRUE	reported	finn-pQTL-R10-v1-ACY3	2	TRUE	0.0303443	54.1384	195.968	53.3022
rs28756986	G	C	G	C	-1.48429	0.049	0.0121462	0.012	FALSE	TRUE	FALSE	ukb-saige-153	14	75514489	0.099	387318	0.62	Colorectal cancer || id:ukb-saige-153	Colorectal cancer	Colorectal cancer || ||	TRUE	MedicineITLab	0.152114	1732	6.21298e-22	ACYP1	TRUE	reported	finn-pQTL-R10-v1-ACYP1	2	TRUE	0.0528689	96.5688	195.968	95.2136
rs11555566	C	T	C	T	1.35499	0.046	0.0413135	0.06	FALSE	FALSE	FALSE	ukb-saige-153	20	43255220	0.045	387318	0.3	Colorectal cancer || id:ukb-saige-153	Colorectal cancer	Colorectal cancer || ||	TRUE	MedicineITLab	0.0784004	1732	7.30634e-62	ADA	TRUE	reported	finn-pQTL-R10-v1-ADA	2	TRUE	0.145436	294.423	195.968	298.7
rs737963	C	T	C	T	0.271467	-0.0042	0.640478	0.61	FALSE	FALSE	FALSE	ukb-saige-153	22	17709771	0.022	387318	0.85	Colorectal cancer || id:ukb-saige-153	Colorectal cancer	Colorectal cancer || ||	TRUE	MedicineITLab	0.0347028	1732	8.931e-15	ADA2	TRUE	reported	finn-pQTL-R10-v1-ADA2	2	TRUE	0.0339386	60.7764	195.968	61.1935
rs4492726	G	A	G	A	-0.241241	-0.0024	0.257523	0.21	FALSE	FALSE	FALSE	ukb-saige-153	10	127951710	0.026	387318	0.93	Colorectal cancer || id:ukb-saige-153	Colorectal cancer	Colorectal cancer || ||	TRUE	MedicineITLab	0.0379717	1732	2.68986e-10	ADAM12	TRUE	reported	finn-pQTL-R10-v1-ADAM12	2	TRUE	0.0222552	39.3778	195.968	40.3629
rs7082031	C	T	C	T	-0.19384	0.021	0.617278	0.55	FALSE	FALSE	FALSE	ukb-saige-153	10	128038717	0.021	387318	0.34	Colorectal cancer || id:ukb-saige-153	Colorectal cancer	Colorectal cancer || ||	TRUE	MedicineITLab	0.0341264	1732	1.57656e-08	ADAM12	TRUE	reported	finn-pQTL-R10-v1-ADAM12	2	TRUE	0.0177534	31.2685	195.968	32.2631
rs10494300	C	G	C	G	-0.204692	0.0011	0.410985	0.41	FALSE	TRUE	FALSE	ukb-saige-153	1	154726546	0.022	387318	0.96	Colorectal cancer || id:ukb-saige-153	Colorectal cancer	Colorectal cancer || ||	TRUE	MedicineITLab	0.0345399	1732	3.73173e-09	ADAM15	TRUE	reported	finn-pQTL-R10-v1-ADAM15	2	TRUE	0.0202854	35.8204	195.968	35.1204
rs11589479	A	G	A	G	0.976916	-0.025	0.14348	0.16	FALSE	FALSE	FALSE	ukb-saige-153	1	155033308	0.029	387318	0.38	Colorectal cancer || id:ukb-saige-153	Colorectal cancer	Colorectal cancer || ||	TRUE	MedicineITLab	0.0423113	1732	4.87528e-103	ADAM15	TRUE	reported	finn-pQTL-R10-v1-ADAM15	2	TRUE	0.23457	530.169	195.968	533.091
rs1218549	C	A	C	A	0.192329	0.01	0.592512	0.67	FALSE	FALSE	FALSE	ukb-saige-153	1	154803645	0.023	387318	0.66	Colorectal cancer || id:ukb-saige-153	Colorectal cancer	Colorectal cancer || ||	TRUE	MedicineITLab	0.0345425	1732	2.98346e-08	ADAM15	TRUE	reported	finn-pQTL-R10-v1-ADAM15	2	TRUE	0.0178621	31.4634	195.968	31.0015
rs138229125	A	G	A	G	0.421684	0.13	0.0534971	0.014	FALSE	FALSE	FALSE	ukb-saige-153	7	86894109	0.099	387318	0.19	Colorectal cancer || id:ukb-saige-153	Colorectal cancer	Colorectal cancer || ||	TRUE	MedicineITLab	0.0764455	1732	3.98951e-08	ADAM22	TRUE	reported	finn-pQTL-R10-v1-ADAM22	2	TRUE	0.0180076	31.7245	195.968	30.4278
rs114014367	T	C	T	C	0.519455	-0.056	0.0610277	0.03	FALSE	FALSE	FALSE	ukb-saige-153	2	207004856	0.063	387318	0.38	Colorectal cancer || id:ukb-saige-153	Colorectal cancer	Colorectal cancer || ||	TRUE	MedicineITLab	0.0708262	1732	3.41036e-13	ADAM23	TRUE	reported	finn-pQTL-R10-v1-ADAM23	2	TRUE	0.0309247	55.207	195.968	53.7908
rs13029574	C	T	C	T	0.316903	0.014	0.247113	0.3	FALSE	FALSE	FALSE	ukb-saige-153	2	207289362	0.023	387318	0.56	Colorectal cancer || id:ukb-saige-153	Colorectal cancer	Colorectal cancer || ||	TRUE	MedicineITLab	0.0383932	1732	2.99847e-16	ADAM23	TRUE	reported	finn-pQTL-R10-v1-ADAM23	2	TRUE	0.0373687	67.1575	195.968	68.1309
rs141950547	T	C	T	C	-1.16508	0.025	0.0206516	0.025	FALSE	FALSE	FALSE	ukb-saige-153	2	207381568	0.07	387318	0.72	Colorectal cancer || id:ukb-saige-153	Colorectal cancer	Colorectal cancer || ||	TRUE	MedicineITLab	0.117941	1732	1.99756e-22	ADAM23	TRUE	reported	finn-pQTL-R10-v1-ADAM23	2	TRUE	0.0549076	100.509	195.968	97.5847
rs72933203	A	T	A	T	0.840412	0.0022	0.059033	0.1	FALSE	TRUE	FALSE	ukb-saige-153	2	207311349	0.035	387318	0.95	Colorectal cancer || id:ukb-saige-153	Colorectal cancer	Colorectal cancer || ||	TRUE	MedicineITLab	0.0697268	1732	3.50268e-32	ADAM23	TRUE	reported	finn-pQTL-R10-v1-ADAM23	2	TRUE	0.0784664	147.305	195.968	145.273
rs1891370	A	G	A	G	-0.702051	-0.035	0.89302	0.9	FALSE	FALSE	FALSE	ukb-saige-153	10	135073395	0.035	387318	0.31	Colorectal cancer || id:ukb-saige-153	Colorectal cancer	Colorectal cancer || ||	TRUE	MedicineITLab	0.0524306	1732	5.6079e-39	ADAM8	TRUE	reported	finn-pQTL-R10-v1-ADAM8	2	TRUE	0.094174	179.859	195.968	179.295
rs139428144	T	C	T	C	-1.34102	-0.072	0.0153002	0.017	FALSE	FALSE	FALSE	ukb-saige-153	9	136223537	0.083	387318	0.39	Colorectal cancer || id:ukb-saige-153	Colorectal cancer	Colorectal cancer || ||	TRUE	MedicineITLab	0.135764	1732	2.01465e-22	ADAMTS13	TRUE	reported	finn-pQTL-R10-v1-ADAMTS13	2	TRUE	0.0541878	99.1157	195.968	97.5666
rs11265564	G	A	G	A	-0.198774	0.028	0.554736	0.59	FALSE	FALSE	FALSE	ukb-saige-153	1	161164166	0.022	387318	0.2	Colorectal cancer || id:ukb-saige-153	Colorectal cancer	Colorectal cancer || ||	TRUE	MedicineITLab	0.0336429	1732	4.15193e-09	ADAMTS4	TRUE	reported	finn-pQTL-R10-v1-ADAMTS4	2	TRUE	0.0195188	34.4397	195.968	34.9086
rs2875238	C	T	C	T	0.443025	-0.023	0.668374	0.63	FALSE	FALSE	FALSE	ukb-saige-153	11	130282078	0.022	387318	0.3	Colorectal cancer || id:ukb-saige-153	Colorectal cancer	Colorectal cancer || ||	TRUE	MedicineITLab	0.0347149	1732	1.03395e-35	ADAMTS8	TRUE	reported	finn-pQTL-R10-v1-ADAMTS8	2	TRUE	0.0870071	164.867	195.968	162.864
rs56057355	A	G	A	G	0.27925	0.012	0.135463	0.14	FALSE	FALSE	FALSE	ukb-saige-153	11	130302382	0.031	387318	0.7	Colorectal cancer || id:ukb-saige-153	Colorectal cancer	Colorectal cancer || ||	TRUE	MedicineITLab	0.0487971	1732	1.23339e-08	ADAMTS8	TRUE	reported	finn-pQTL-R10-v1-ADAMTS8	2	TRUE	0.018265	32.1864	195.968	32.749
rs7116068	T	G	T	G	0.246969	0.014	0.440667	0.41	FALSE	FALSE	FALSE	ukb-saige-153	11	130732739	0.022	387318	0.53	Colorectal cancer || id:ukb-saige-153	Colorectal cancer	Colorectal cancer || ||	TRUE	MedicineITLab	0.0346138	1732	1.41775e-12	ADAMTS8	TRUE	reported	finn-pQTL-R10-v1-ADAMTS8	2	TRUE	0.0300674	53.6291	195.968	50.908
rs791461	C	T	C	T	0.408991	0.019	0.516238	0.53	FALSE	FALSE	FALSE	ukb-saige-153	19	1507535	0.023	387318	0.41	Colorectal cancer || id:ukb-saige-153	Colorectal cancer	Colorectal cancer || ||	TRUE	MedicineITLab	0.0335238	1732	6.69268e-33	ADAMTSL5	TRUE	reported	finn-pQTL-R10-v1-ADAMTSL5	2	TRUE	0.0835486	157.716	195.968	148.84
rs146537195	C	G	C	G	-0.59974	-0.011	0.0773299	0.074	FALSE	TRUE	FALSE	ukb-saige-153	6	69095414	0.041	387318	0.8	Colorectal cancer || id:ukb-saige-153	Colorectal cancer	Colorectal cancer || ||	TRUE	MedicineITLab	0.063629	1732	1.3213e-20	ADGRB3	TRUE	reported	finn-pQTL-R10-v1-ADGRB3	2	TRUE	0.0513275	93.6008	195.968	88.8415
rs2345237	G	T	G	T	0.193165	-0.013	0.434739	0.44	FALSE	FALSE	FALSE	ukb-saige-153	6	70375796	0.022	387318	0.55	Colorectal cancer || id:ukb-saige-153	Colorectal cancer	Colorectal cancer || ||	TRUE	MedicineITLab	0.033882	1732	1.39675e-08	ADGRB3	TRUE	reported	finn-pQTL-R10-v1-ADGRB3	2	TRUE	0.0183385	32.3183	195.968	32.5027
rs77925302	T	A	T	A	0.698533	-0.011	0.0194585	0.016	FALSE	TRUE	FALSE	ukb-saige-153	6	68390258	0.091	387318	0.91	Colorectal cancer || id:ukb-saige-153	Colorectal cancer	Colorectal cancer || ||	TRUE	MedicineITLab	0.12323	1732	1.68415e-08	ADGRB3	TRUE	reported	finn-pQTL-R10-v1-ADGRB3	2	TRUE	0.01862	32.8237	195.968	32.1322
rs945528	C	T	C	T	-0.928569	-0.0099	0.61942	0.63	FALSE	FALSE	FALSE	ukb-saige-153	6	69673773	0.022	387318	0.65	Colorectal cancer || id:ukb-saige-153	Colorectal cancer	Colorectal cancer || ||	TRUE	MedicineITLab	0.0272868	1732	9.31108e-195	ADGRB3	TRUE	reported	finn-pQTL-R10-v1-ADGRB3	2	TRUE	0.406527	1185.04	195.968	1158.04
rs10848261	C	T	C	T	-0.261308	0.01	0.532458	0.48	FALSE	FALSE	FALSE	ukb-saige-153	12	131439239	0.021	387318	0.64	Colorectal cancer || id:ukb-saige-153	Colorectal cancer	Colorectal cancer || ||	TRUE	MedicineITLab	0.0340647	1732	2.83204e-14	ADGRD1	TRUE	reported	finn-pQTL-R10-v1-ADGRD1	2	TRUE	0.0339971	60.8848	195.968	58.8432
rs4759533	A	G	A	G	0.977633	-0.01	0.946998	0.95	FALSE	FALSE	FALSE	ukb-saige-153	12	131456252	0.048	387318	0.83	Colorectal cancer || id:ukb-saige-153	Colorectal cancer	Colorectal cancer || ||	TRUE	MedicineITLab	0.0735862	1732	2.00032e-38	ADGRD1	TRUE	reported	finn-pQTL-R10-v1-ADGRD1	2	TRUE	0.0959451	183.601	195.968	176.506
rs112217832	C	G	C	G	-1.30548	0.05	0.0361942	0.0087	FALSE	TRUE	FALSE	ukb-saige-153	19	6897195	0.11	387318	0.66	Colorectal cancer || id:ukb-saige-153	Colorectal cancer	Colorectal cancer || ||	TRUE	MedicineITLab	0.085327	1732	1.17463e-49	ADGRE1	TRUE	reported	finn-pQTL-R10-v1-ADGRE1	2	TRUE	0.118905	233.465	195.968	234.082
rs112335904	T	C	T	C	0.45052	-0.012	0.0656932	0.061	FALSE	FALSE	FALSE	ukb-saige-153	19	6972204	0.047	387318	0.8	Colorectal cancer || id:ukb-saige-153	Colorectal cancer	Colorectal cancer || ||	TRUE	MedicineITLab	0.0670324	1732	2.44399e-11	ADGRE1	TRUE	reported	finn-pQTL-R10-v1-ADGRE1	2	TRUE	0.0249154	44.205	195.968	45.1709
rs11881631	G	A	G	A	0.335035	0.046	0.0995711	0.07	FALSE	FALSE	FALSE	ukb-saige-153	19	14298620	0.043	387318	0.28	Colorectal cancer || id:ukb-saige-153	Colorectal cancer	Colorectal cancer || ||	TRUE	MedicineITLab	0.0555906	1732	2.03897e-09	ADGRE2	TRUE	reported	finn-pQTL-R10-v1-ADGRE2	2	TRUE	0.0201277	35.5361	195.968	36.3227
rs8108409	C	T	C	T	-0.622205	0.0018	0.0244363	0.012	FALSE	FALSE	FALSE	ukb-saige-153	19	14499471	0.11	387318	0.99	Colorectal cancer || id:ukb-saige-153	Colorectal cancer	Colorectal cancer || ||	TRUE	MedicineITLab	0.112689	1732	3.87258e-08	ADGRE5	TRUE	reported	finn-pQTL-R10-v1-ADGRE5	2	TRUE	0.0184581	32.5331	195.968	30.4862
rs190913833	A	T	A	T	-1.16318	-0.053	0.0132851	0.0088	FALSE	TRUE	FALSE	ukb-saige-153	4	100034777	0.12	387318	0.66	Colorectal cancer || id:ukb-saige-153	Colorectal cancer	Colorectal cancer || ||	TRUE	MedicineITLab	0.14761	1732	5.73588e-15	ADH1B	TRUE	reported	finn-pQTL-R10-v1-ADH1B	2	TRUE	0.0354716	63.6226	195.968	62.0958
rs28744611	C	T	C	T	0.470487	-0.035	0.123534	0.12	FALSE	FALSE	FALSE	ukb-saige-153	4	7738676	0.033	387318	0.3	Colorectal cancer || id:ukb-saige-153	Colorectal cancer	Colorectal cancer || ||	TRUE	MedicineITLab	0.0499573	1732	1.41808e-20	AFAP1	TRUE	reported	finn-pQTL-R10-v1-AFAP1	2	TRUE	0.0479343	87.1016	195.968	88.6946
rs35509185	C	T	C	T	0.946146	-0.029	0.268917	0.3	FALSE	FALSE	FALSE	ukb-saige-153	4	7783772	0.023	387318	0.21	Colorectal cancer || id:ukb-saige-153	Colorectal cancer	Colorectal cancer || ||	TRUE	MedicineITLab	0.0310643	1732	1.68655e-163	AFAP1	TRUE	reported	finn-pQTL-R10-v1-AFAP1	2	TRUE	0.351991	939.715	195.968	927.669
rs6829551	C	T	C	T	-0.228214	-0.037	0.218815	0.23	FALSE	FALSE	FALSE	ukb-saige-153	4	74173715	0.025	387318	0.14	Colorectal cancer || id:ukb-saige-153	Colorectal cancer	Colorectal cancer || ||	TRUE	MedicineITLab	0.0414017	1732	4.07812e-08	AFP	TRUE	reported	finn-pQTL-R10-v1-AFP	2	TRUE	0.0178051	31.3613	195.968	30.3842
rs3121560	A	C	A	C	-0.404052	-0.041	0.387687	0.34	FALSE	FALSE	FALSE	ukb-saige-153	1	968226	0.022	387318	0.066	Colorectal cancer || id:ukb-saige-153	Colorectal cancer	Colorectal cancer || ||	TRUE	MedicineITLab	0.0335011	1732	3.20553e-32	AGRN	TRUE	reported	finn-pQTL-R10-v1-AGRN	2	TRUE	0.0775103	145.36	195.968	145.464
rs192581617	A	T	A	T	0.943658	-0.074	0.022883	0.011	FALSE	TRUE	FALSE	ukb-saige-153	16	67366808	0.11	387318	0.5	Colorectal cancer || id:ukb-saige-153	Colorectal cancer	Colorectal cancer || ||	TRUE	MedicineITLab	0.11312	1732	1.4713e-16	AGRP	TRUE	reported	finn-pQTL-R10-v1-AGRP	2	TRUE	0.0398216	71.7485	195.968	69.5906
rs4762	A	G	A	G	0.849821	-0.013	0.166232	0.12	FALSE	FALSE	FALSE	ukb-saige-153	1	230845977	0.033	387318	0.7	Colorectal cancer || id:ukb-saige-153	Colorectal cancer	Colorectal cancer || ||	TRUE	MedicineITLab	0.0398208	1732	6.76862e-90	AGT	TRUE	reported	finn-pQTL-R10-v1-AGT	2	TRUE	0.200191	433.017	195.968	455.444
rs55649245	A	G	A	G	-0.32283	0.012	0.313726	0.31	FALSE	FALSE	FALSE	ukb-saige-153	2	241793545	0.023	387318	0.6	Colorectal cancer || id:ukb-saige-153	Colorectal cancer	Colorectal cancer || ||	TRUE	MedicineITLab	0.0357836	1732	4.79292e-19	AGXT	TRUE	reported	finn-pQTL-R10-v1-AGXT	2	TRUE	0.0448772	81.2854	195.968	81.3916
rs34563588	C	A	C	A	-1.15914	-0.13	0.0132308	0.017	FALSE	FALSE	FALSE	ukb-saige-153	20	32856053	0.086	387318	0.12	Colorectal cancer || id:ukb-saige-153	Colorectal cancer	Colorectal cancer || ||	TRUE	MedicineITLab	0.150149	1732	1.95434e-14	AHCY	TRUE	reported	finn-pQTL-R10-v1-AHCY	2	TRUE	0.0350835	62.9013	195.968	59.5973
rs10873552	G	A	G	A	0.255747	-0.032	0.58225	0.66	FALSE	FALSE	FALSE	ukb-saige-153	14	105433129	0.022	387318	0.15	Colorectal cancer || id:ukb-saige-153	Colorectal cancer	Colorectal cancer || ||	TRUE	MedicineITLab	0.0344996	1732	1.92221e-13	AHNAK2	TRUE	reported	finn-pQTL-R10-v1-AHNAK2	2	TRUE	0.0318183	56.8547	195.968	54.9532
rs73185681	A	G	A	G	0.654525	0.01	0.0400738	0.056	FALSE	FALSE	FALSE	ukb-saige-153	3	186488841	0.048	387318	0.83	Colorectal cancer || id:ukb-saige-153	Colorectal cancer	Colorectal cancer || ||	TRUE	MedicineITLab	0.0855648	1732	3.32889e-14	AHSG	TRUE	reported	finn-pQTL-R10-v1-AHSG	2	TRUE	0.0329595	58.9634	195.968	58.5143
rs7635884	T	C	T	C	0.855778	-0.015	0.606806	0.64	FALSE	FALSE	FALSE	ukb-saige-153	3	186341191	0.022	387318	0.5	Colorectal cancer || id:ukb-saige-153	Colorectal cancer	Colorectal cancer || ||	TRUE	MedicineITLab	0.0277963	1732	2.39883e-166	AHSG	TRUE	reported	finn-pQTL-R10-v1-AHSG	2	TRUE	0.349469	929.367	195.968	947.869
rs11244283	C	G	C	G	-0.338761	-0.013	0.27912	0.27	FALSE	TRUE	FALSE	ukb-saige-153	9	133973528	0.024	387318	0.58	Colorectal cancer || id:ukb-saige-153	Colorectal cancer	Colorectal cancer || ||	TRUE	MedicineITLab	0.037436	1732	3.77485e-19	AIF1L	TRUE	reported	finn-pQTL-R10-v1-AIF1L	2	TRUE	0.0461818	83.7628	195.968	81.8857
rs73191498	A	G	A	G	0.310377	-0.034	0.181253	0.13	FALSE	FALSE	FALSE	ukb-saige-153	3	105006615	0.032	387318	0.29	Colorectal cancer || id:ukb-saige-153	Colorectal cancer	Colorectal cancer || ||	TRUE	MedicineITLab	0.0422965	1732	3.31589e-13	ALCAM	TRUE	reported	finn-pQTL-R10-v1-ALCAM	2	TRUE	0.028592	50.92	195.968	53.8481
rs887241	C	A	C	A	0.556606	-0.019	0.659983	0.66	FALSE	FALSE	FALSE	ukb-saige-153	17	19645938	0.022	387318	0.4	Colorectal cancer || id:ukb-saige-153	Colorectal cancer	Colorectal cancer || ||	TRUE	MedicineITLab	0.0330865	1732	6.18443e-59	ALDH3A1	TRUE	reported	finn-pQTL-R10-v1-ALDH3A1	2	TRUE	0.139046	279.399	195.968	283.005
rs11886043	C	T	C	T	0.54321	-0.041	0.277917	0.24	FALSE	FALSE	FALSE	ukb-saige-153	2	233301535	0.025	387318	0.1	Colorectal cancer || id:ukb-saige-153	Colorectal cancer	Colorectal cancer || ||	TRUE	MedicineITLab	0.0351417	1732	1.37309e-50	ALPP	TRUE	reported	finn-pQTL-R10-v1-ALPP	2	TRUE	0.118432	232.412	195.968	238.941
rs2741276	A	G	A	G	-0.461218	0.12	0.0479792	0.036	FALSE	FALSE	FALSE	ukb-saige-153	2	233339849	0.058	387318	0.038	Colorectal cancer || id:ukb-saige-153	Colorectal cancer	Colorectal cancer || ||	TRUE	MedicineITLab	0.0783686	1732	4.76288e-09	ALPP	TRUE	reported	finn-pQTL-R10-v1-ALPP	2	TRUE	0.0194331	34.2855	195.968	34.636
rs215397	A	C	A	C	0.222119	-0.018	0.501029	0.45	FALSE	FALSE	FALSE	ukb-saige-153	12	47766696	0.021	387318	0.4	Colorectal cancer || id:ukb-saige-153	Colorectal cancer	Colorectal cancer || ||	TRUE	MedicineITLab	0.0333404	1732	3.61493e-11	AMIGO2	TRUE	reported	finn-pQTL-R10-v1-AMIGO2	2	TRUE	0.0246683	43.7556	195.968	44.3843
rs11160698	C	T	C	T	0.247314	-0.018	0.540533	0.45	FALSE	FALSE	FALSE	ukb-saige-153	14	103230111	0.021	387318	0.41	Colorectal cancer || id:ukb-saige-153	Colorectal cancer	Colorectal cancer || ||	TRUE	MedicineITLab	0.0336313	1732	2.96142e-13	AMN	TRUE	reported	finn-pQTL-R10-v1-AMN	2	TRUE	0.0303811	54.2062	195.968	54.0767
rs2295829	C	G	C	G	0.80902	0.0071	0.367777	0.39	FALSE	TRUE	FALSE	ukb-saige-153	14	103389003	0.024	387318	0.77	Colorectal cancer || id:ukb-saige-153	Colorectal cancer	Colorectal cancer || ||	TRUE	MedicineITLab	0.0301276	1732	4.59198e-133	AMN	TRUE	reported	finn-pQTL-R10-v1-AMN	2	TRUE	0.304371	756.958	195.968	721.09
rs117302185	C	A	C	A	-0.554429	0.04	0.029731	0.025	FALSE	FALSE	FALSE	ukb-saige-153	11	10481179	0.07	387318	0.57	Colorectal cancer || id:ukb-saige-153	Colorectal cancer	Colorectal cancer || ||	TRUE	MedicineITLab	0.100754	1732	4.29813e-08	AMPD3	TRUE	reported	finn-pQTL-R10-v1-AMPD3	2	TRUE	0.0177347	31.235	195.968	30.2808
rs79057673	C	G	C	G	-0.575247	0.1	0.030039	0.021	FALSE	TRUE	FALSE	ukb-saige-153	11	10478269	0.075	387318	0.18	Colorectal cancer || id:ukb-saige-153	Colorectal cancer	Colorectal cancer || ||	TRUE	MedicineITLab	0.0978394	1732	4.92754e-09	AMPD3	TRUE	reported	finn-pQTL-R10-v1-AMPD3	2	TRUE	0.0192832	34.0158	195.968	34.5686
rs142370265	T	C	T	C	-0.910034	-0.063	0.0649155	0.043	FALSE	FALSE	FALSE	ukb-saige-153	1	104027932	0.054	387318	0.25	Colorectal cancer || id:ukb-saige-153	Colorectal cancer	Colorectal cancer || ||	TRUE	MedicineITLab	0.0669392	1732	4.53942e-40	AMY2A	TRUE	reported	finn-pQTL-R10-v1-AMY2A	2	TRUE	0.100541	193.379	195.968	184.822
rs145316860	C	T	C	T	-0.660593	-0.15	0.0341926	0.015	FALSE	FALSE	FALSE	ukb-saige-153	1	104390432	0.09	387318	0.087	Colorectal cancer || id:ukb-saige-153	Colorectal cancer	Colorectal cancer || ||	TRUE	MedicineITLab	0.0934975	1732	2.31313e-12	AMY2B	TRUE	reported	finn-pQTL-R10-v1-AMY2B	2	TRUE	0.0288218	51.3414	195.968	49.9192
rs4244372	A	T	A	T	-0.44997	-0.014	0.364475	0.36	FALSE	TRUE	FALSE	ukb-saige-153	1	104040027	0.022	387318	0.53	Colorectal cancer || id:ukb-saige-153	Colorectal cancer	Colorectal cancer || ||	TRUE	MedicineITLab	0.0337727	1732	1.26241e-38	AMY2B	TRUE	reported	finn-pQTL-R10-v1-AMY2B	2	TRUE	0.0937988	179.068	195.968	177.515
rs17114699	T	G	T	G	0.773695	0.027	0.12224	0.11	FALSE	FALSE	FALSE	ukb-saige-153	14	21158910	0.034	387318	0.42	Colorectal cancer || id:ukb-saige-153	Colorectal cancer	Colorectal cancer || ||	TRUE	MedicineITLab	0.0484734	1732	1.31644e-53	ANG	TRUE	reported	finn-pQTL-R10-v1-ANG	2	TRUE	0.128457	254.986	195.968	254.761
rs2873965	C	T	C	T	-0.2158	-0.031	0.54782	0.56	FALSE	FALSE	FALSE	ukb-saige-153	14	21193321	0.021	387318	0.15	Colorectal cancer || id:ukb-saige-153	Colorectal cancer	Colorectal cancer || ||	TRUE	MedicineITLab	0.0341427	1732	3.30864e-10	ANG	TRUE	reported	finn-pQTL-R10-v1-ANG	2	TRUE	0.0230718	40.8569	195.968	39.9491
rs4652307	T	C	T	C	-0.308439	-0.027	0.466645	0.53	FALSE	FALSE	FALSE	ukb-saige-153	1	178528222	0.021	387318	0.21	Colorectal cancer || id:ukb-saige-153	Colorectal cancer	Colorectal cancer || ||	TRUE	MedicineITLab	0.0331146	1732	3.60413e-20	ANGPTL1	TRUE	reported	finn-pQTL-R10-v1-ANGPTL1	2	TRUE	0.0473556	85.9977	195.968	86.756
rs871632	C	T	C	T	0.304419	0.017	0.347214	0.28	FALSE	FALSE	FALSE	ukb-saige-153	1	178903766	0.024	387318	0.48	Colorectal cancer || id:ukb-saige-153	Colorectal cancer	Colorectal cancer || ||	TRUE	MedicineITLab	0.0354452	1732	1.93375e-17	ANGPTL1	TRUE	reported	finn-pQTL-R10-v1-ANGPTL1	2	TRUE	0.0420089	75.8623	195.968	73.7613
rs62117515	T	G	T	G	0.323607	-0.0061	0.365459	0.27	FALSE	FALSE	FALSE	ukb-saige-153	19	8458261	0.025	387318	0.8	Colorectal cancer || id:ukb-saige-153	Colorectal cancer	Colorectal cancer || ||	TRUE	MedicineITLab	0.03442	1732	1.64021e-20	ANGPTL4	TRUE	reported	finn-pQTL-R10-v1-ANGPTL4	2	TRUE	0.0485696	88.3147	195.968	88.3922
rs4932143	C	G	C	G	-0.259479	-0.023	0.754816	0.72	FALSE	TRUE	FALSE	ukb-saige-153	15	90372067	0.024	387318	0.34	Colorectal cancer || id:ukb-saige-153	Colorectal cancer	Colorectal cancer || ||	TRUE	MedicineITLab	0.0389799	1732	3.74714e-11	ANPEP	TRUE	reported	finn-pQTL-R10-v1-ANPEP	2	TRUE	0.0249211	44.2154	195.968	44.3122
rs75149654	C	T	C	T	0.874541	-0.00058	0.0286238	0.058	FALSE	FALSE	FALSE	ukb-saige-153	15	90335256	0.046	387318	0.99	Colorectal cancer || id:ukb-saige-153	Colorectal cancer	Colorectal cancer || ||	TRUE	MedicineITLab	0.101968	1732	2.13403e-17	ANPEP	TRUE	reported	finn-pQTL-R10-v1-ANPEP	2	TRUE	0.042531	76.8469	195.968	73.5584
rs12904906	T	G	T	G	0.367514	0.02	0.0950471	0.13	FALSE	FALSE	FALSE	ukb-saige-153	15	60689995	0.031	387318	0.53	Colorectal cancer || id:ukb-saige-153	Colorectal cancer	Colorectal cancer || ||	TRUE	MedicineITLab	0.0584312	1732	4.01939e-10	ANXA2	TRUE	reported	finn-pQTL-R10-v1-ANXA2	2	TRUE	0.023235	41.1527	195.968	39.5602
rs1049742	T	C	T	C	0.484944	0.029	0.0754121	0.08	FALSE	FALSE	FALSE	ukb-saige-153	7	150554553	0.039	387318	0.46	Colorectal cancer || id:ukb-saige-153	Colorectal cancer	Colorectal cancer || ||	TRUE	MedicineITLab	0.0625259	1732	1.48765e-14	AOC1	TRUE	reported	finn-pQTL-R10-v1-AOC1	2	TRUE	0.0327946	58.6583	195.968	60.1538
rs145509704	T	C	T	C	0.423073	0.063	0.051551	0.018	FALSE	FALSE	FALSE	ukb-saige-153	17	41426467	0.087	387318	0.47	Colorectal cancer || id:ukb-saige-153	Colorectal cancer	Colorectal cancer || ||	TRUE	MedicineITLab	0.0760911	1732	3.11788e-08	AOC3	TRUE	reported	finn-pQTL-R10-v1-AOC3	2	TRUE	0.017503	30.8196	195.968	30.9145
rs33986943	A	G	A	G	-1.00228	-0.045	0.076191	0.11	FALSE	FALSE	FALSE	ukb-saige-153	17	41004637	0.034	387318	0.19	Colorectal cancer || id:ukb-saige-153	Colorectal cancer	Colorectal cancer || ||	TRUE	MedicineITLab	0.0596528	1732	8.38108e-59	AOC3	TRUE	reported	finn-pQTL-R10-v1-AOC3	2	TRUE	0.141415	284.942	195.968	282.304
rs1130409	G	T	G	T	-0.366466	-0.015	0.509648	0.48	FALSE	FALSE	FALSE	ukb-saige-153	14	20925154	0.021	387318	0.47	Colorectal cancer || id:ukb-saige-153	Colorectal cancer	Colorectal cancer || ||	TRUE	MedicineITLab	0.0323108	1732	8.23379e-29	APEX1	TRUE	reported	finn-pQTL-R10-v1-APEX1	2	TRUE	0.0671237	124.479	195.968	128.639
rs205421	G	A	G	A	-0.212225	-0.0043	0.718113	0.74	FALSE	FALSE	FALSE	ukb-saige-153	16	28076486	0.025	387318	0.86	Colorectal cancer || id:ukb-saige-153	Colorectal cancer	Colorectal cancer || ||	TRUE	MedicineITLab	0.0372102	1732	1.37835e-08	APOBR	TRUE	reported	finn-pQTL-R10-v1-APOBR	2	TRUE	0.0182344	32.1314	195.968	32.5289
rs8048750	C	T	C	T	0.252661	-0.036	0.366738	0.36	FALSE	FALSE	FALSE	ukb-saige-153	16	29266272	0.022	387318	0.11	Colorectal cancer || id:ukb-saige-153	Colorectal cancer	Colorectal cancer || ||	TRUE	MedicineITLab	0.0345519	1732	3.99117e-13	APOBR	TRUE	reported	finn-pQTL-R10-v1-APOBR	2	TRUE	0.0296514	52.8645	195.968	53.4728
rs139828053	C	T	C	T	-0.493373	0.0047	0.0400716	0.032	FALSE	FALSE	FALSE	ukb-saige-153	3	195298892	0.062	387318	0.94	Colorectal cancer || id:ukb-saige-153	Colorectal cancer	Colorectal cancer || ||	TRUE	MedicineITLab	0.0876883	1732	2.14176e-08	APOD	TRUE	reported	finn-pQTL-R10-v1-APOD	2	TRUE	0.0187265	33.0151	195.968	31.6568
rs76895450	T	G	T	G	-0.730582	-0.03	0.0174037	0.027	FALSE	FALSE	FALSE	ukb-saige-153	3	195189400	0.07	387318	0.67	Colorectal cancer || id:ukb-saige-153	Colorectal cancer	Colorectal cancer || ||	TRUE	MedicineITLab	0.133257	1732	4.81172e-08	APOD	TRUE	reported	finn-pQTL-R10-v1-APOD	2	TRUE	0.0182551	32.1686	195.968	30.0578
rs429358	C	T	C	T	-0.997951	0.065	0.16845	0.16	FALSE	FALSE	FALSE	ukb-saige-153	19	45411941	0.029	387318	0.027	Colorectal cancer || id:ukb-saige-153	Colorectal cancer	Colorectal cancer || ||	TRUE	MedicineITLab	0.0397748	1732	9.72747e-119	APOE	TRUE	reported	finn-pQTL-R10-v1-APOE	2	TRUE	0.279002	669.453	195.968	629.51
rs138634592	A	C	A	C	-1.43374	0.13	0.00783747	0.01	FALSE	FALSE	FALSE	ukb-saige-153	17	64260789	0.11	387318	0.23	Colorectal cancer || id:ukb-saige-153	Colorectal cancer	Colorectal cancer || ||	TRUE	MedicineITLab	0.191676	1732	1.17571e-13	APOH	TRUE	reported	finn-pQTL-R10-v1-APOH	2	TRUE	0.031969	57.1329	195.968	55.9507
rs76452927	A	G	A	G	-0.753493	-0.04	0.0794559	0.053	FALSE	FALSE	FALSE	ukb-saige-153	17	64241706	0.048	387318	0.4	Colorectal cancer || id:ukb-saige-153	Colorectal cancer	Colorectal cancer || ||	TRUE	MedicineITLab	0.0610295	1732	1.26882e-33	APOH	TRUE	reported	finn-pQTL-R10-v1-APOH	2	TRUE	0.0830537	156.697	195.968	152.433
rs4820224	A	G	A	G	-0.299163	0.018	0.143103	0.11	FALSE	FALSE	FALSE	ukb-saige-153	22	36653275	0.035	387318	0.6	Colorectal cancer || id:ukb-saige-153	Colorectal cancer	Colorectal cancer || ||	TRUE	MedicineITLab	0.0483096	1732	7.37531e-10	APOL1	TRUE	reported	finn-pQTL-R10-v1-APOL1	2	TRUE	0.0219494	38.8247	195.968	38.3485
rs117549666	C	G	C	G	-0.546595	0.062	0.0322205	0.013	FALSE	TRUE	FALSE	ukb-saige-153	12	105595985	0.096	387318	0.52	Colorectal cancer || id:ukb-saige-153	Colorectal cancer	Colorectal cancer || ||	TRUE	MedicineITLab	0.0961204	1732	1.51869e-08	APPL2	TRUE	reported	finn-pQTL-R10-v1-APPL2	2	TRUE	0.0186325	32.8461	195.968	32.337
rs2781668	T	C	T	C	-0.279958	0.0012	0.230953	0.17	FALSE	FALSE	FALSE	ukb-saige-153	6	131897278	0.029	387318	0.96	Colorectal cancer || id:ukb-saige-153	Colorectal cancer	Colorectal cancer || ||	TRUE	MedicineITLab	0.0405322	1732	6.92787e-12	ARG1	TRUE	reported	finn-pQTL-R10-v1-ARG1	2	TRUE	0.0278415	49.5452	195.968	47.7074
rs34151223	T	C	T	C	0.253626	0.0085	0.236402	0.17	FALSE	FALSE	FALSE	ukb-saige-153	8	1809573	0.029	387318	0.77	Colorectal cancer || id:ukb-saige-153	Colorectal cancer	Colorectal cancer || ||	TRUE	MedicineITLab	0.039986	1732	2.87177e-10	ARHGEF10	TRUE	reported	finn-pQTL-R10-v1-ARHGEF10	2	TRUE	0.0232238	41.1324	195.968	40.232
rs17591965	G	A	G	A	-0.560011	-0.018	0.170053	0.21	FALSE	FALSE	FALSE	ukb-saige-153	7	143873377	0.026	387318	0.49	Colorectal cancer || id:ukb-saige-153	Colorectal cancer	Colorectal cancer || ||	TRUE	MedicineITLab	0.0442737	1732	3.87436e-35	ARHGEF5	TRUE	reported	finn-pQTL-R10-v1-ARHGEF5	2	TRUE	0.0885233	168.019	195.968	159.993
rs714429	C	T	C	T	0.253243	0.008	0.284874	0.31	FALSE	FALSE	FALSE	ukb-saige-153	7	144153734	0.023	387318	0.73	Colorectal cancer || id:ukb-saige-153	Colorectal cancer	Colorectal cancer || ||	TRUE	MedicineITLab	0.0373607	1732	1.66188e-11	ARHGEF5	TRUE	reported	finn-pQTL-R10-v1-ARHGEF5	2	TRUE	0.0261301	46.4179	195.968	45.9457
rs11568181	A	G	A	G	0.827418	0.23	0.0185025	0.0051	FALSE	FALSE	FALSE	ukb-saige-153	22	50506734	0.15	387318	0.13	Colorectal cancer || id:ukb-saige-153	Colorectal cancer	Colorectal cancer || ||	TRUE	MedicineITLab	0.135554	1483	1.31905e-09	ARSA	TRUE	reported	finn-pQTL-R10-v1-ARSA	2	TRUE	0.0248656	37.7651	195.968	37.2585
rs73445553	G	C	G	C	1.03103	0.033	0.0131834	0.033	FALSE	TRUE	FALSE	ukb-saige-153	22	51036925	0.06	387318	0.58	Colorectal cancer || id:ukb-saige-153	Colorectal cancer	Colorectal cancer || ||	TRUE	MedicineITLab	0.160872	1483	1.96399e-10	ARSA	TRUE	reported	finn-pQTL-R10-v1-ARSA	2	TRUE	0.027659	42.1282	195.968	41.0754
rs1717570	G	A	G	A	-0.272244	0.022	0.462934	0.42	FALSE	FALSE	FALSE	ukb-saige-153	5	78276474	0.021	387318	0.3	Colorectal cancer || id:ukb-saige-153	Colorectal cancer	Colorectal cancer || ||	TRUE	MedicineITLab	0.033721	1732	1.26707e-15	ARSB	TRUE	reported	finn-pQTL-R10-v1-ARSB	2	TRUE	0.0368547	66.1984	195.968	65.1802
rs4859614	G	A	G	A	0.369818	-0.025	0.303003	0.32	FALSE	FALSE	FALSE	ukb-saige-153	4	77013191	0.023	387318	0.27	Colorectal cancer || id:ukb-saige-153	Colorectal cancer	Colorectal cancer || ||	TRUE	MedicineITLab	0.0358488	1732	2.95937e-24	ART3	TRUE	reported	finn-pQTL-R10-v1-ART3	2	TRUE	0.0577675	106.065	195.968	106.421
rs75902876	A	G	A	G	0.483051	-0.038	0.0771205	0.083	FALSE	FALSE	FALSE	ukb-saige-153	11	3663021	0.042	387318	0.36	Colorectal cancer || id:ukb-saige-153	Colorectal cancer	Colorectal cancer || ||	TRUE	MedicineITLab	0.0652183	1732	2.01372e-13	ART5	TRUE	reported	finn-pQTL-R10-v1-ART5	2	TRUE	0.0332147	59.4356	195.968	54.8589
rs112279525	T	C	T	C	-1.26395	0.065	0.0514333	0.038	FALSE	FALSE	FALSE	ukb-saige-153	8	17934853	0.056	387318	0.24	Colorectal cancer || id:ukb-saige-153	Colorectal cancer	Colorectal cancer || ||	TRUE	MedicineITLab	0.0706685	1732	8.85319e-66	ASAH1	TRUE	reported	finn-pQTL-R10-v1-ASAH1	2	TRUE	0.155884	319.482	195.968	319.895
rs10857505	T	C	T	C	-0.367899	0.038	0.184686	0.19	FALSE	FALSE	FALSE	ukb-saige-153	10	50761240	0.027	387318	0.16	Colorectal cancer || id:ukb-saige-153	Colorectal cancer	Colorectal cancer || ||	TRUE	MedicineITLab	0.0422194	1732	6.73597e-18	ASAH2	TRUE	reported	finn-pQTL-R10-v1-ASAH2	2	TRUE	0.0407611	73.5132	195.968	75.9334
rs1877558	T	C	T	C	-0.765979	0.0085	0.19055	0.24	FALSE	FALSE	FALSE	ukb-saige-153	10	51992580	0.027	387318	0.75	Colorectal cancer || id:ukb-saige-153	Colorectal cancer	Colorectal cancer || ||	TRUE	MedicineITLab	0.0389645	1732	8.11708e-78	ASAH2	TRUE	reported	finn-pQTL-R10-v1-ASAH2	2	TRUE	0.180993	382.315	195.968	386.452
rs434325	C	A	C	A	0.224503	-0.018	0.476623	0.57	FALSE	FALSE	FALSE	ukb-saige-153	17	7011349	0.022	387318	0.39	Colorectal cancer || id:ukb-saige-153	Colorectal cancer	Colorectal cancer || ||	TRUE	MedicineITLab	0.0334433	1732	2.57751e-11	ASGR2	TRUE	reported	finn-pQTL-R10-v1-ASGR2	2	TRUE	0.0251457	44.6242	195.968	45.0636
rs3780346	A	G	A	G	-0.245113	0.019	0.429061	0.44	FALSE	FALSE	FALSE	ukb-saige-153	9	94974188	0.021	387318	0.37	Colorectal cancer || id:ukb-saige-153	Colorectal cancer	Colorectal cancer || ||	TRUE	MedicineITLab	0.0336582	1732	4.95678e-13	ASPN	TRUE	reported	finn-pQTL-R10-v1-ASPN	2	TRUE	0.0294355	52.4678	195.968	53.0336
rs8074498	A	T	A	T	-0.334193	-0.017	0.626887	0.58	FALSE	TRUE	FALSE	ukb-saige-153	17	79954544	0.022	387318	0.43	Colorectal cancer || id:ukb-saige-153	Colorectal cancer	Colorectal cancer || ||	TRUE	MedicineITLab	0.0347503	1732	2.29562e-21	ASPSCR1	TRUE	reported	finn-pQTL-R10-v1-ASPSCR1	2	TRUE	0.0522462	95.3685	195.968	92.4863
rs12574012	A	G	A	G	0.30817	0.03	0.504143	0.54	FALSE	FALSE	FALSE	ukb-saige-153	11	62076226	0.021	387318	0.16	Colorectal cancer || id:ukb-saige-153	Colorectal cancer	Colorectal cancer || ||	TRUE	MedicineITLab	0.0332859	1732	5.94977e-20	ASRGL1	TRUE	reported	finn-pQTL-R10-v1-ASRGL1	2	TRUE	0.0474811	86.237	195.968	85.7156
rs2580382	G	A	G	A	-0.658296	0.015	0.947581	0.94	FALSE	FALSE	FALSE	ukb-saige-153	2	27406555	0.045	387318	0.74	Colorectal cancer || id:ukb-saige-153	Colorectal cancer	Colorectal cancer || ||	TRUE	MedicineITLab	0.0742722	1732	1.88756e-18	ATRAID	TRUE	reported	finn-pQTL-R10-v1-ATRAID	2	TRUE	0.0430504	77.8278	195.968	78.5579
rs184693841	A	T	A	T	-0.467441	-0.12	0.0504551	0.0091	FALSE	TRUE	FALSE	ukb-saige-153	20	4323944	0.12	387318	0.32	Colorectal cancer || id:ukb-saige-153	Colorectal cancer	Colorectal cancer || ||	TRUE	MedicineITLab	0.0781678	1732	2.70539e-09	ATRN	TRUE	reported	finn-pQTL-R10-v1-ATRN	2	TRUE	0.0209365	36.9947	195.968	35.76
rs7265122	C	T	C	T	-1.10127	-0.0077	0.0660587	0.057	FALSE	FALSE	FALSE	ukb-saige-153	20	3521344	0.046	387318	0.87	Colorectal cancer || id:ukb-saige-153	Colorectal cancer	Colorectal cancer || ||	TRUE	MedicineITLab	0.0637279	1732	7.5405e-62	ATRN	TRUE	reported	finn-pQTL-R10-v1-ATRN	2	TRUE	0.149647	304.449	195.968	298.627
rs2290130	A	G	A	G	-0.914936	0.039	0.310055	0.23	FALSE	FALSE	FALSE	ukb-saige-153	2	232263127	0.025	387318	0.12	Colorectal cancer || id:ukb-saige-153	Colorectal cancer	Colorectal cancer || ||	TRUE	MedicineITLab	0.0297496	1732	4.62381e-166	B3GNT7	TRUE	reported	finn-pQTL-R10-v1-B3GNT7	2	TRUE	0.35815	965.333	195.968	945.843
rs78205285	T	C	T	C	0.587655	-0.011	0.0320994	0.012	FALSE	FALSE	FALSE	ukb-saige-153	2	232376126	0.1	387318	0.92	Colorectal cancer || id:ukb-saige-153	Colorectal cancer	Colorectal cancer || ||	TRUE	MedicineITLab	0.0952796	1732	8.60756e-10	B3GNT7	TRUE	reported	finn-pQTL-R10-v1-B3GNT7	2	TRUE	0.0214587	37.9376	195.968	38.0404
rs2031902	T	C	T	C	-0.25629	-0.011	0.622192	0.59	FALSE	FALSE	FALSE	ukb-saige-153	9	33117524	0.022	387318	0.61	Colorectal cancer || id:ukb-saige-153	Colorectal cancer	Colorectal cancer || ||	TRUE	MedicineITLab	0.0354272	1732	7.00164e-13	B4GALT1	TRUE	reported	finn-pQTL-R10-v1-B4GALT1	2	TRUE	0.0308808	55.1262	195.968	52.3347
rs77639897	T	C	T	C	-0.585864	-0.094	0.0267163	0.032	FALSE	FALSE	FALSE	ukb-saige-153	19	45668710	0.062	387318	0.13	Colorectal cancer || id:ukb-saige-153	Colorectal cancer	Colorectal cancer || ||	TRUE	MedicineITLab	0.103896	1732	1.9943e-08	BCAM	TRUE	reported	finn-pQTL-R10-v1-BCAM	2	TRUE	0.01785	31.4418	195.968	31.7977
rs2365715	G	A	G	A	-0.252617	0.024	0.327704	0.39	FALSE	FALSE	FALSE	ukb-saige-153	1	156615114	0.023	387318	0.29	Colorectal cancer || id:ukb-saige-153	Colorectal cancer	Colorectal cancer || ||	TRUE	MedicineITLab	0.0359657	1732	3.09101e-12	BCAN	TRUE	reported	finn-pQTL-R10-v1-BCAN	2	TRUE	0.0281188	50.053	195.968	49.3342
rs4453321	G	A	G	A	0.460303	0.032	0.677531	0.72	FALSE	FALSE	FALSE	ukb-saige-153	12	24968749	0.024	387318	0.18	Colorectal cancer || id:ukb-saige-153	Colorectal cancer	Colorectal cancer || ||	TRUE	MedicineITLab	0.0350479	1732	1.25228e-37	BCAT1	TRUE	reported	finn-pQTL-R10-v1-BCAT1	2	TRUE	0.0925837	176.512	195.968	172.49
rs1707652	T	C	T	C	-0.535805	0.0072	0.246325	0.37	FALSE	FALSE	FALSE	ukb-saige-153	3	165478799	0.022	387318	0.74	Colorectal cancer || id:ukb-saige-153	Colorectal cancer	Colorectal cancer || ||	TRUE	MedicineITLab	0.0364014	1732	2.70271e-46	BCHE	TRUE	reported	finn-pQTL-R10-v1-BCHE	2	TRUE	0.106595	206.411	195.968	216.659
rs17767256	G	T	G	T	0.816566	0.0034	0.332532	0.33	FALSE	FALSE	FALSE	ukb-saige-153	17	28581043	0.023	387318	0.88	Colorectal cancer || id:ukb-saige-153	Colorectal cancer	Colorectal cancer || ||	TRUE	MedicineITLab	0.0308444	1732	6.0256e-130	BLMH	TRUE	reported	finn-pQTL-R10-v1-BLMH	2	TRUE	0.29599	727.35	195.968	700.858
rs149698066	A	G	A	G	-1.75198	0.0055	0.00482044	0.0058	FALSE	FALSE	FALSE	ukb-saige-153	19	40964064	0.16	387318	0.97	Colorectal cancer || id:ukb-saige-153	Colorectal cancer	Colorectal cancer || ||	TRUE	MedicineITLab	0.234861	1732	1.36553e-13	BLVRB	TRUE	reported	finn-pQTL-R10-v1-BLVRB	2	TRUE	0.0294494	52.4934	195.968	55.6463
rs34008398	A	G	A	G	-2.20329	-0.12	0.00631145	0.012	FALSE	FALSE	FALSE	ukb-saige-153	2	69093413	0.096	387318	0.23	Colorectal cancer || id:ukb-saige-153	Colorectal cancer	Colorectal cancer || ||	TRUE	MedicineITLab	0.213885	1732	3.42058e-24	BMP10	TRUE	reported	finn-pQTL-R10-v1-BMP10	2	TRUE	0.060891	112.172	195.968	106.116
rs56139516	C	T	C	T	-0.515946	0.026	0.0549676	0.083	FALSE	FALSE	FALSE	ukb-saige-153	1	149861829	0.039	387318	0.5	Colorectal cancer || id:ukb-saige-153	Colorectal cancer	Colorectal cancer || ||	TRUE	MedicineITLab	0.0745605	1732	6.346e-12	BOLA1	TRUE	reported	finn-pQTL-R10-v1-BOLA1	2	TRUE	0.0276562	49.206	195.968	47.8841
rs6059219	A	T	A	T	-0.224132	0.0028	0.246954	0.27	FALSE	TRUE	FALSE	ukb-saige-153	20	31851118	0.024	387318	0.91	Colorectal cancer || id:ukb-saige-153	Colorectal cancer	Colorectal cancer || ||	TRUE	MedicineITLab	0.0390974	1732	1.16423e-08	BPIFA2	TRUE	reported	finn-pQTL-R10-v1-BPIFA2	2	TRUE	0.0186842	32.9392	195.968	32.8634
rs2424963	C	T	C	T	-0.428514	-0.019	0.537528	0.58	FALSE	FALSE	FALSE	ukb-saige-153	20	31694448	0.022	387318	0.37	Colorectal cancer || id:ukb-saige-153	Colorectal cancer	Colorectal cancer || ||	TRUE	MedicineITLab	0.0324357	1732	4.917e-38	BPIFB1	TRUE	reported	finn-pQTL-R10-v1-BPIFB1	2	TRUE	0.0912949	173.808	195.968	174.535
rs6088066	T	A	T	A	-0.352485	0.012	0.278867	0.23	FALSE	TRUE	FALSE	ukb-saige-153	20	31596472	0.026	387318	0.64	Colorectal cancer || id:ukb-saige-153	Colorectal cancer	Colorectal cancer || ||	TRUE	MedicineITLab	0.0369353	1732	4.51856e-21	BPIFB2	TRUE	reported	finn-pQTL-R10-v1-BPIFB2	2	TRUE	0.0499717	90.9983	195.968	91.0748
rs6088118	G	A	G	A	-0.278059	-0.0056	0.399508	0.31	FALSE	FALSE	FALSE	ukb-saige-153	20	31721782	0.023	387318	0.81	Colorectal cancer || id:ukb-saige-153	Colorectal cancer	Colorectal cancer || ||	TRUE	MedicineITLab	0.0349589	1732	3.23668e-15	BPIFB2	TRUE	reported	finn-pQTL-R10-v1-BPIFB2	2	TRUE	0.0370968	66.65	195.968	63.2643
rs7932863	G	A	G	A	-0.22511	0.03	0.634301	0.73	FALSE	FALSE	FALSE	ukb-saige-153	11	1412848	0.024	387318	0.22	Colorectal cancer || id:ukb-saige-153	Colorectal cancer	Colorectal cancer || ||	TRUE	MedicineITLab	0.0353734	1732	2.51385e-10	BRSK2	TRUE	reported	finn-pQTL-R10-v1-BRSK2	2	TRUE	0.0235092	41.6502	195.968	40.4982
rs13131786	A	G	A	G	-0.723792	-0.14	0.0728977	0.015	FALSE	FALSE	FALSE	ukb-saige-153	4	15191532	0.09	387318	0.13	Colorectal cancer || id:ukb-saige-153	Colorectal cancer	Colorectal cancer || ||	TRUE	MedicineITLab	0.0637593	1732	7.39946e-29	BST1	TRUE	reported	finn-pQTL-R10-v1-BST1	2	TRUE	0.0708107	131.838	195.968	128.867
rs6824333	T	C	T	C	0.296379	0.025	0.254399	0.27	FALSE	FALSE	FALSE	ukb-saige-153	4	15943910	0.024	387318	0.31	Colorectal cancer || id:ukb-saige-153	Colorectal cancer	Colorectal cancer || ||	TRUE	MedicineITLab	0.0379266	1732	9.49948e-15	BST1	TRUE	reported	finn-pQTL-R10-v1-BST1	2	TRUE	0.0333232	59.6364	195.968	61.0671
rs73224659	A	C	A	C	-1.33998	-0.022	0.152161	0.16	FALSE	FALSE	FALSE	ukb-saige-153	4	15714189	0.029	387318	0.45	Colorectal cancer || id:ukb-saige-153	Colorectal cancer	Colorectal cancer || ||	TRUE	MedicineITLab	0.0339851	1732	1e-200	BST1	TRUE	reported	finn-pQTL-R10-v1-BST1	2	TRUE	0.46328	1493.28	195.968	1554.6
rs74955421	A	G	A	G	-0.808222	-0.098	0.0187101	0.021	FALSE	FALSE	FALSE	ukb-saige-153	4	14808574	0.075	387318	0.19	Colorectal cancer || id:ukb-saige-153	Colorectal cancer	Colorectal cancer || ||	TRUE	MedicineITLab	0.125716	1732	1.65745e-10	BST1	TRUE	reported	finn-pQTL-R10-v1-BST1	2	TRUE	0.0239864	42.5163	195.968	41.3314
rs10404346	T	C	T	C	-0.284458	-0.0063	0.827187	0.88	FALSE	FALSE	FALSE	ukb-saige-153	19	17505248	0.034	387318	0.85	Colorectal cancer || id:ukb-saige-153	Colorectal cancer	Colorectal cancer || ||	TRUE	MedicineITLab	0.0455037	1732	5.11482e-10	BST2	TRUE	reported	finn-pQTL-R10-v1-BST2	2	TRUE	0.0231338	40.9692	195.968	39.0789
rs6827826	C	G	C	G	-0.374104	0.055	0.126841	0.13	FALSE	TRUE	FALSE	ukb-saige-153	4	75720016	0.032	387318	0.086	Colorectal cancer || id:ukb-saige-153	Colorectal cancer	Colorectal cancer || ||	TRUE	MedicineITLab	0.0511697	1732	4.03274e-13	BTC	TRUE	reported	finn-pQTL-R10-v1-BTC	2	TRUE	0.0310004	55.3465	195.968	53.4514
rs13078881	C	G	C	G	-1.68839	0.0037	0.0486868	0.043	FALSE	TRUE	FALSE	ukb-saige-153	3	15686693	0.052	387318	0.94	Colorectal cancer || id:ukb-saige-153	Colorectal cancer	Colorectal cancer || ||	TRUE	MedicineITLab	0.0667341	1732	2.00909e-120	BTD	TRUE	reported	finn-pQTL-R10-v1-BTD	2	TRUE	0.264065	620.75	195.968	640.103
rs142868093	A	G	A	G	-0.898437	-0.057	0.0182562	0.015	FALSE	FALSE	FALSE	ukb-saige-153	3	16265573	0.092	387318	0.54	Colorectal cancer || id:ukb-saige-153	Colorectal cancer	Colorectal cancer || ||	TRUE	MedicineITLab	0.131815	1732	1.28973e-11	BTD	TRUE	reported	finn-pQTL-R10-v1-BTD	2	TRUE	0.0289344	51.5479	195.968	46.4564
rs7620727	A	G	A	G	-0.249362	0.057	0.209246	0.31	FALSE	FALSE	FALSE	ukb-saige-153	3	15159602	0.023	387318	0.014	Colorectal cancer || id:ukb-saige-153	Colorectal cancer	Colorectal cancer || ||	TRUE	MedicineITLab	0.0419101	1732	3.23966e-09	BTD	TRUE	reported	finn-pQTL-R10-v1-BTD	2	TRUE	0.0205773	36.3467	195.968	35.4016
rs12201459	T	C	T	C	0.362433	0.008	0.203416	0.11	FALSE	FALSE	FALSE	ukb-saige-153	6	26668983	0.034	387318	0.81	Colorectal cancer || id:ukb-saige-153	Colorectal cancer	Colorectal cancer || ||	TRUE	MedicineITLab	0.0415657	1732	6.42688e-18	BTN1A1	TRUE	reported	finn-pQTL-R10-v1-BTN1A1	2	TRUE	0.0425699	76.9203	195.968	76.03
rs139079388	A	G	A	G	-1.30096	0.17	0.0121428	0.0049	FALSE	FALSE	FALSE	ukb-saige-153	6	27255954	0.16	387318	0.27	Colorectal cancer || id:ukb-saige-153	Colorectal cancer	Colorectal cancer || ||	TRUE	MedicineITLab	0.145817	1732	1.13999e-18	BTN2A1	TRUE	reported	finn-pQTL-R10-v1-BTN2A1	2	TRUE	0.0406042	73.2182	195.968	79.5997
rs6905150	C	T	C	T	-0.305696	-0.0054	0.140893	0.13	FALSE	FALSE	FALSE	ukb-saige-153	6	26849991	0.032	387318	0.86	Colorectal cancer || id:ukb-saige-153	Colorectal cancer	Colorectal cancer || ||	TRUE	MedicineITLab	0.0486233	1732	4.08733e-10	BTN2A1	TRUE	reported	finn-pQTL-R10-v1-BTN2A1	2	TRUE	0.0226228	40.0433	195.968	39.5267
rs12200798	T	C	T	C	0.396877	0.031	0.200331	0.098	FALSE	FALSE	FALSE	ukb-saige-153	6	27188467	0.036	387318	0.39	Colorectal cancer || id:ukb-saige-153	Colorectal cancer	Colorectal cancer || ||	TRUE	MedicineITLab	0.0415781	1732	4.43609e-21	BTN3A2	TRUE	reported	finn-pQTL-R10-v1-BTN3A2	2	TRUE	0.0504662	91.9467	195.968	91.1135
rs1979	T	G	T	G	-1.06014	0.016	0.0903036	0.13	FALSE	FALSE	FALSE	ukb-saige-153	6	26377591	0.031	387318	0.62	Colorectal cancer || id:ukb-saige-153	Colorectal cancer	Colorectal cancer || ||	TRUE	MedicineITLab	0.0529391	1732	2.11398e-80	BTN3A2	TRUE	reported	finn-pQTL-R10-v1-BTN3A2	2	TRUE	0.184654	391.798	195.968	401.027
rs172378	G	A	G	A	-0.366072	0.0037	0.418807	0.38	FALSE	FALSE	FALSE	ukb-saige-153	1	22965438	0.022	387318	0.87	Colorectal cancer || id:ukb-saige-153	Colorectal cancer	Colorectal cancer || ||	TRUE	MedicineITLab	0.033887	1732	2.27039e-26	C1QA	TRUE	reported	finn-pQTL-R10-v1-C1QA	2	TRUE	0.0652375	120.737	195.968	116.699
rs57499443	T	C	T	C	-0.246578	-0.016	0.331979	0.2	FALSE	FALSE	FALSE	ukb-saige-153	2	119924544	0.027	387318	0.56	Colorectal cancer || id:ukb-saige-153	Colorectal cancer	Colorectal cancer || ||	TRUE	MedicineITLab	0.0355206	1732	5.45381e-12	C1QL2	TRUE	reported	finn-pQTL-R10-v1-C1QL2	2	TRUE	0.0269674	47.9466	195.968	48.189
rs7213056	G	A	G	A	-0.994062	0.082	0.0403817	0.0098	FALSE	FALSE	FALSE	ukb-saige-153	17	77092496	0.11	387318	0.46	Colorectal cancer || id:ukb-saige-153	Colorectal cancer	Colorectal cancer || ||	TRUE	MedicineITLab	0.0838054	1732	2.94239e-31	C1QTNF1	TRUE	reported	finn-pQTL-R10-v1-C1QTNF1	2	TRUE	0.0765844	143.479	195.968	140.696
rs2509656	A	G	A	G	0.251058	0.062	0.190985	0.14	FALSE	FALSE	FALSE	ukb-saige-153	11	119208576	0.03	387318	0.04	Colorectal cancer || id:ukb-saige-153	Colorectal cancer	Colorectal cancer || ||	TRUE	MedicineITLab	0.0429401	1732	5.98053e-09	C1QTNF5	TRUE	reported	finn-pQTL-R10-v1-C1QTNF5	2	TRUE	0.0194775	34.3655	195.968	34.1839
rs739041	G	A	G	A	0.209272	-0.002	0.336978	0.41	FALSE	FALSE	FALSE	ukb-saige-153	22	37624999	0.022	387318	0.93	Colorectal cancer || id:ukb-saige-153	Colorectal cancer	Colorectal cancer || ||	TRUE	MedicineITLab	0.0349759	1732	2.65131e-09	C1QTNF6	TRUE	reported	finn-pQTL-R10-v1-C1QTNF6	2	TRUE	0.0195696	34.5312	195.968	35.8001
rs146798432	A	T	A	T	-0.737503	0.11	0.0293552	0.017	FALSE	TRUE	FALSE	ukb-saige-153	13	24842915	0.088	387318	0.22	Colorectal cancer || id:ukb-saige-153	Colorectal cancer	Colorectal cancer || ||	TRUE	MedicineITLab	0.0976752	1732	6.97268e-14	C1QTNF9	TRUE	reported	finn-pQTL-R10-v1-C1QTNF9	2	TRUE	0.0309958	55.338	195.968	57.011
rs1961993	A	C	A	C	1.18938	0.023	0.824881	0.8	FALSE	FALSE	FALSE	ukb-saige-153	13	24891017	0.027	387318	0.4	Colorectal cancer || id:ukb-saige-153	Colorectal cancer	Colorectal cancer || ||	TRUE	MedicineITLab	0.0349895	1732	2.00447e-194	C1QTNF9	TRUE	reported	finn-pQTL-R10-v1-C1QTNF9	2	TRUE	0.408692	1195.72	195.968	1155.49
rs114492815	T	C	T	C	-0.533761	-0.073	0.0487421	0.043	FALSE	FALSE	FALSE	ukb-saige-153	6	31944884	0.053	387318	0.16	Colorectal cancer || id:ukb-saige-153	Colorectal cancer	Colorectal cancer || ||	TRUE	MedicineITLab	0.0781403	1732	1.16547e-11	C2	TRUE	reported	finn-pQTL-R10-v1-C2	2	TRUE	0.0264196	46.9462	195.968	46.6599
rs3104376	C	T	C	T	0.283976	0.044	0.769095	0.79	FALSE	FALSE	FALSE	ukb-saige-153	6	32600003	0.026	387318	0.091	Colorectal cancer || id:ukb-saige-153	Colorectal cancer	Colorectal cancer || ||	TRUE	MedicineITLab	0.0393133	1732	7.56659e-13	C2	TRUE	reported	finn-pQTL-R10-v1-C2	2	TRUE	0.0286422	51.0121	195.968	52.1776
rs10760140	T	C	T	C	-0.220719	0.034	0.457037	0.43	FALSE	FALSE	FALSE	ukb-saige-153	9	123798321	0.022	387318	0.12	Colorectal cancer || id:ukb-saige-153	Colorectal cancer	Colorectal cancer || ||	TRUE	MedicineITLab	0.0334614	1732	5.58856e-11	C5	TRUE	reported	finn-pQTL-R10-v1-C5	2	TRUE	0.0241786	42.8654	195.968	43.5102
rs433224	T	C	T	C	0.332703	0.023	0.314948	0.34	FALSE	FALSE	FALSE	ukb-saige-153	5	41267725	0.023	387318	0.3	Colorectal cancer || id:ukb-saige-153	Colorectal cancer	Colorectal cancer || ||	TRUE	MedicineITLab	0.0359256	1732	5.813e-20	C7	TRUE	reported	finn-pQTL-R10-v1-C7	2	TRUE	0.0477646	86.7776	195.968	85.7641
rs74480769	G	A	G	A	-1.3899	0.063	0.0745822	0.029	FALSE	FALSE	FALSE	ukb-saige-153	5	40972211	0.065	387318	0.34	Colorectal cancer || id:ukb-saige-153	Colorectal cancer	Colorectal cancer || ||	TRUE	MedicineITLab	0.0559559	1732	9.77237e-117	C7	TRUE	reported	finn-pQTL-R10-v1-C7	2	TRUE	0.266668	629.094	195.968	616.986
rs684216	G	C	G	C	0.538036	0.022	0.379311	0.33	FALSE	TRUE	FALSE	ukb-saige-153	1	57403803	0.023	387318	0.32	Colorectal cancer || id:ukb-saige-153	Colorectal cancer	Colorectal cancer || ||	TRUE	MedicineITLab	0.0323983	1732	1.39733e-57	C8B	TRUE	reported	finn-pQTL-R10-v1-C8B	2	TRUE	0.136308	273.029	195.968	275.79
rs74798634	T	C	T	C	-0.382217	-0.056	0.0768137	0.036	FALSE	FALSE	FALSE	ukb-saige-153	1	57278791	0.057	387318	0.33	Colorectal cancer || id:ukb-saige-153	Colorectal cancer	Colorectal cancer || ||	TRUE	MedicineITLab	0.0638365	1732	2.58637e-09	C8B	TRUE	reported	finn-pQTL-R10-v1-C8B	2	TRUE	0.0207194	36.603	195.968	35.8494
rs835219	T	C	T	C	-0.337161	0.028	0.917001	0.9	FALSE	FALSE	FALSE	ukb-saige-153	5	39359403	0.035	387318	0.43	Colorectal cancer || id:ukb-saige-153	Colorectal cancer	Colorectal cancer || ||	TRUE	MedicineITLab	0.0608902	1732	3.54577e-08	C9	TRUE	reported	finn-pQTL-R10-v1-C9	2	TRUE	0.017304	30.4631	195.968	30.6605
rs4984241	G	A	G	A	0.280306	0.0061	0.56149	0.63	FALSE	FALSE	FALSE	ukb-saige-153	15	63623463	0.022	387318	0.78	Colorectal cancer || id:ukb-saige-153	Colorectal cancer	Colorectal cancer || ||	TRUE	MedicineITLab	0.0339129	1732	2.73716e-16	CA12	TRUE	reported	finn-pQTL-R10-v1-CA12	2	TRUE	0.0386916	69.6305	195.968	68.318
rs12541299	T	C	T	C	0.244009	-0.0095	0.74482	0.63	FALSE	FALSE	FALSE	ukb-saige-153	8	86211927	0.022	387318	0.67	Colorectal cancer || id:ukb-saige-153	Colorectal cancer	Colorectal cancer || ||	TRUE	MedicineITLab	0.0381883	1732	2.1326e-10	CA13	TRUE	reported	finn-pQTL-R10-v1-CA13	2	TRUE	0.0226329	40.0616	195.968	40.8273
rs345186	T	C	T	C	-0.541619	0.0029	0.0759668	0.04	FALSE	FALSE	FALSE	ukb-saige-153	17	58235343	0.054	387318	0.96	Colorectal cancer || id:ukb-saige-153	Colorectal cancer	Colorectal cancer || ||	TRUE	MedicineITLab	0.0647111	1732	1.17436e-16	CA4	TRUE	reported	finn-pQTL-R10-v1-CA4	2	TRUE	0.0411841	74.3088	195.968	70.0536
rs113836477	C	T	C	T	0.897566	0.026	0.151466	0.19	FALSE	FALSE	FALSE	ukb-saige-153	16	87928873	0.027	387318	0.33	Colorectal cancer || id:ukb-saige-153	Colorectal cancer	Colorectal cancer || ||	TRUE	MedicineITLab	0.042885	1732	6.91035e-87	CA5A	TRUE	reported	finn-pQTL-R10-v1-CA5A	2	TRUE	0.207084	451.821	195.968	438.048
rs3765963	G	A	G	A	0.801343	-0.031	0.291669	0.41	FALSE	FALSE	FALSE	ukb-saige-153	1	9034598	0.022	387318	0.16	Colorectal cancer || id:ukb-saige-153	Colorectal cancer	Colorectal cancer || ||	TRUE	MedicineITLab	0.0323665	1732	4.29536e-116	CA6	TRUE	reported	finn-pQTL-R10-v1-CA6	2	TRUE	0.265334	624.813	195.968	612.979
rs41280748	C	A	C	A	0.51525	-0.02	0.0437259	0.018	FALSE	FALSE	FALSE	ukb-saige-153	1	9133405	0.08	387318	0.8	Colorectal cancer || id:ukb-saige-153	Colorectal cancer	Colorectal cancer || ||	TRUE	MedicineITLab	0.0821754	1732	4.5459e-10	CA6	TRUE	reported	finn-pQTL-R10-v1-CA6	2	TRUE	0.0222017	39.2811	195.968	39.3145
rs3750430	T	A	T	A	-0.295299	0.028	0.135695	0.061	FALSE	TRUE	FALSE	ukb-saige-153	9	35658163	0.045	387318	0.54	Colorectal cancer || id:ukb-saige-153	Colorectal cancer	Colorectal cancer || ||	TRUE	MedicineITLab	0.0498011	1732	3.65915e-09	CA9	TRUE	reported	finn-pQTL-R10-v1-CA9	2	TRUE	0.0204543	36.1249	195.968	35.1598
rs11170662	T	C	T	C	0.228669	-0.015	0.215993	0.13	FALSE	FALSE	FALSE	ukb-saige-153	12	54112090	0.032	387318	0.64	Colorectal cancer || id:ukb-saige-153	Colorectal cancer	Colorectal cancer || ||	TRUE	MedicineITLab	0.040963	1732	2.7503e-08	CALCOCO1	TRUE	reported	finn-pQTL-R10-v1-CALCOCO1	2	TRUE	0.0177094	31.1896	195.968	31.1624
rs753513	T	C	T	C	-0.286945	0.049	0.322516	0.29	FALSE	FALSE	FALSE	ukb-saige-153	17	3793472	0.024	387318	0.039	Colorectal cancer || id:ukb-saige-153	Colorectal cancer	Colorectal cancer || ||	TRUE	MedicineITLab	0.0364965	1732	6.58415e-15	CAMKK1	TRUE	reported	finn-pQTL-R10-v1-CAMKK1	2	TRUE	0.0359814	64.5711	195.968	61.8151
rs57931764	A	G	A	G	0.628989	-0.1	0.0241951	0.023	FALSE	FALSE	FALSE	ukb-saige-153	17	77007467	0.072	387318	0.15	Colorectal cancer || id:ukb-saige-153	Colorectal cancer	Colorectal cancer || ||	TRUE	MedicineITLab	0.109689	1732	1.15313e-08	CANT1	TRUE	reported	finn-pQTL-R10-v1-CANT1	2	TRUE	0.0186813	32.9339	195.968	32.8821
rs6719105	A	G	A	G	-0.22813	-0.0042	0.779622	0.8	FALSE	FALSE	FALSE	ukb-saige-153	2	85998129	0.027	387318	0.88	Colorectal cancer || id:ukb-saige-153	Colorectal cancer	Colorectal cancer || ||	TRUE	MedicineITLab	0.0407768	1732	2.56584e-08	CAPG	TRUE	reported	finn-pQTL-R10-v1-CAPG	2	TRUE	0.0178833	31.5014	195.968	31.2996
rs6886	C	T	C	T	-1.01068	0.011	0.614054	0.67	FALSE	FALSE	FALSE	ukb-saige-153	2	85622059	0.023	387318	0.61	Colorectal cancer || id:ukb-saige-153	Colorectal cancer	Colorectal cancer || ||	TRUE	MedicineITLab	0.0255478	1732	1e-200	CAPG	TRUE	reported	finn-pQTL-R10-v1-CAPG	2	TRUE	0.484162	1623.76	195.968	1565.02
rs16956504	C	T	C	T	0.308983	-0.0023	0.158124	0.1	FALSE	FALSE	FALSE	ukb-saige-153	16	66432381	0.035	387318	0.95	Colorectal cancer || id:ukb-saige-153	Colorectal cancer	Colorectal cancer || ||	TRUE	MedicineITLab	0.0459793	1732	2.4581e-11	CDH5	TRUE	reported	finn-pQTL-R10-v1-CDH5	2	TRUE	0.0254182	45.1204	195.968	45.159
rs1921086	T	G	T	G	0.474996	-0.0018	0.516286	0.55	FALSE	FALSE	FALSE	ukb-saige-153	5	30840139	0.021	387318	0.93	Colorectal cancer || id:ukb-saige-153	Colorectal cancer	Colorectal cancer || ||	TRUE	MedicineITLab	0.0318429	1732	1.9893e-47	CDH6	TRUE	reported	finn-pQTL-R10-v1-CDH6	2	TRUE	0.112691	219.715	195.968	222.513
rs35470188	G	C	G	C	0.840949	0.0065	0.0303231	0.075	FALSE	TRUE	FALSE	ukb-saige-153	5	31111255	0.041	387318	0.87	Colorectal cancer || id:ukb-saige-153	Colorectal cancer	Colorectal cancer || ||	TRUE	MedicineITLab	0.0959562	1732	4.41164e-18	CDH6	TRUE	reported	finn-pQTL-R10-v1-CDH6	2	TRUE	0.0415882	75.0696	195.968	76.8057
rs7705566	G	A	G	A	0.231229	-0.059	0.28274	0.21	FALSE	FALSE	FALSE	ukb-saige-153	5	31259129	0.027	387318	0.028	Colorectal cancer || id:ukb-saige-153	Colorectal cancer	Colorectal cancer || ||	TRUE	MedicineITLab	0.0377143	1732	1.07892e-09	CDH6	TRUE	reported	finn-pQTL-R10-v1-CDH6	2	TRUE	0.021686	38.3483	195.968	37.59
rs4549181	T	C	T	C	-0.736003	-0.015	0.207183	0.3	FALSE	FALSE	FALSE	ukb-saige-153	20	23728873	0.023	387318	0.51	Colorectal cancer || id:ukb-saige-153	Colorectal cancer	Colorectal cancer || ||	TRUE	MedicineITLab	0.0382786	1732	8.00387e-75	CST1	TRUE	reported	finn-pQTL-R10-v1-CST1	2	TRUE	0.177957	374.514	195.968	369.698
rs6036492	A	C	A	C	-0.188135	0.021	0.551369	0.58	FALSE	FALSE	FALSE	ukb-saige-153	20	23702171	0.022	387318	0.34	Colorectal cancer || id:ukb-saige-153	Colorectal cancer	Colorectal cancer || ||	TRUE	MedicineITLab	0.0338107	1732	3.04341e-08	CST1	TRUE	reported	finn-pQTL-R10-v1-CST1	2	TRUE	0.0175106	30.8332	195.968	30.9621
rs6114209	C	G	C	G	-0.397609	-0.011	0.217018	0.21	FALSE	TRUE	FALSE	ukb-saige-153	20	23622266	0.026	387318	0.68	Colorectal cancer || id:ukb-saige-153	Colorectal cancer	Colorectal cancer || ||	TRUE	MedicineITLab	0.0404447	1732	3.12824e-22	CST3	TRUE	reported	finn-pQTL-R10-v1-CST3	2	TRUE	0.0537267	98.2244	195.968	96.6472
rs1799841	G	A	G	A	0.749693	-0.035	0.525264	0.44	FALSE	FALSE	FALSE	ukb-saige-153	20	23860178	0.021	387318	0.1	Colorectal cancer || id:ukb-saige-153	Colorectal cancer	Colorectal cancer || ||	TRUE	MedicineITLab	0.0292277	1732	3.04789e-123	CST5	TRUE	reported	finn-pQTL-R10-v1-CST5	2	TRUE	0.280302	673.787	195.968	657.927
rs4568016	A	G	A	G	0.268781	0.034	0.545669	0.54	FALSE	FALSE	FALSE	ukb-saige-153	20	23709257	0.021	387318	0.11	Colorectal cancer || id:ukb-saige-153	Colorectal cancer	Colorectal cancer || ||	TRUE	MedicineITLab	0.0334508	1732	1.71356e-15	CST5	TRUE	reported	finn-pQTL-R10-v1-CST5	2	TRUE	0.0358203	64.2713	195.968	64.5631
rs78845105	C	A	C	A	0.74664	0.014	0.0225797	0.031	FALSE	FALSE	FALSE	ukb-saige-153	20	24368009	0.061	387318	0.82	Colorectal cancer || id:ukb-saige-153	Colorectal cancer	Colorectal cancer || ||	TRUE	MedicineITLab	0.116169	1732	1.6766e-10	CST5	TRUE	reported	finn-pQTL-R10-v1-CST5	2	TRUE	0.0246066	43.6434	195.968	41.3087
rs10896070	C	T	C	T	-0.219579	0.011	0.46606	0.36	FALSE	FALSE	FALSE	ukb-saige-153	11	65740468	0.022	387318	0.62	Colorectal cancer || id:ukb-saige-153	Colorectal cancer	Colorectal cancer || ||	TRUE	MedicineITLab	0.0336359	1732	8.7277e-11	CST6	TRUE	reported	finn-pQTL-R10-v1-CST6	2	TRUE	0.0239964	42.5344	195.968	42.6163
rs6050262	T	C	T	C	1.53627	-0.067	0.00695559	0.025	FALSE	FALSE	FALSE	ukb-saige-153	20	25015093	0.069	387318	0.33	Colorectal cancer || id:ukb-saige-153	Colorectal cancer	Colorectal cancer || ||	TRUE	MedicineITLab	0.202578	1732	5.4513e-14	CST7	TRUE	reported	finn-pQTL-R10-v1-CST7	2	TRUE	0.0326038	58.3055	195.968	57.5109
rs7269416	G	T	G	T	-0.809553	-0.033	0.102629	0.23	FALSE	FALSE	FALSE	ukb-saige-153	20	24976196	0.025	387318	0.19	Colorectal cancer || id:ukb-saige-153	Colorectal cancer	Colorectal cancer || ||	TRUE	MedicineITLab	0.0529786	1732	1.51775e-49	CST7	TRUE	reported	finn-pQTL-R10-v1-CST7	2	TRUE	0.120715	237.509	195.968	233.501
rs181726789	A	C	A	C	-0.35672	0.084	0.0769472	0.032	FALSE	FALSE	FALSE	ukb-saige-153	21	45152383	0.061	387318	0.17	Colorectal cancer || id:ukb-saige-153	Colorectal cancer	Colorectal cancer || ||	TRUE	MedicineITLab	0.0619127	1732	9.83943e-09	CSTB	TRUE	reported	finn-pQTL-R10-v1-CSTB	2	TRUE	0.0180761	31.8473	195.968	33.1967
rs35285321	A	G	A	G	-0.657532	0.017	0.389456	0.31	FALSE	FALSE	FALSE	ukb-saige-153	21	45201832	0.023	387318	0.47	Colorectal cancer || id:ukb-saige-153	Colorectal cancer	Colorectal cancer || ||	TRUE	MedicineITLab	0.0302264	1732	6.04366e-93	CSTB	TRUE	reported	finn-pQTL-R10-v1-CSTB	2	TRUE	0.205608	447.765	195.968	473.218
rs12032915	C	T	C	T	-1.0935	-0.037	0.00823827	0.0054	FALSE	FALSE	FALSE	ukb-saige-153	1	85417378	0.16	387318	0.81	Colorectal cancer || id:ukb-saige-153	Colorectal cancer	Colorectal cancer || ||	TRUE	MedicineITLab	0.189183	1732	8.83629e-09	CTBS	TRUE	reported	finn-pQTL-R10-v1-CTBS	2	TRUE	0.0195394	34.4768	195.968	33.4098
rs147024168	A	C	A	C	1.71865	-0.021	0.0158742	0.031	FALSE	FALSE	FALSE	ukb-saige-153	1	85035592	0.062	387318	0.74	Colorectal cancer || id:ukb-saige-153	Colorectal cancer	Colorectal cancer || ||	TRUE	MedicineITLab	0.130715	1732	1.05099e-37	CTBS	TRUE	reported	finn-pQTL-R10-v1-CTBS	2	TRUE	0.0922884	175.892	195.968	172.872
rs74843170	C	T	C	T	-1.85515	-0.15	0.0209856	0.0052	FALSE	FALSE	FALSE	ukb-saige-153	1	84925021	0.15	387318	0.31	Colorectal cancer || id:ukb-saige-153	Colorectal cancer	Colorectal cancer || ||	TRUE	MedicineITLab	0.108624	1732	1.48184e-60	CTBS	TRUE	reported	finn-pQTL-R10-v1-CTBS	2	TRUE	0.141416	284.946	195.968	291.68
rs78108204	A	G	A	G	-0.444595	0.053	0.0743807	0.055	FALSE	FALSE	FALSE	ukb-saige-153	1	85003785	0.047	387318	0.27	Colorectal cancer || id:ukb-saige-153	Colorectal cancer	Colorectal cancer || ||	TRUE	MedicineITLab	0.0627581	1732	2.02628e-12	CTBS	TRUE	reported	finn-pQTL-R10-v1-CTBS	2	TRUE	0.0272177	48.4041	195.968	50.1868
rs147671104	T	C	T	C	0.806115	-0.17	0.0334918	0.0023	FALSE	FALSE	FALSE	ukb-saige-153	8	104538150	0.23	387318	0.47	Colorectal cancer || id:ukb-saige-153	Colorectal cancer	Colorectal cancer || ||	TRUE	MedicineITLab	0.092884	1732	9.06776e-18	CTHRC1	TRUE	reported	finn-pQTL-R10-v1-CTHRC1	2	TRUE	0.0420696	75.9767	195.968	75.3203
rs8045196	G	T	G	T	0.524599	0.023	0.806431	0.73	FALSE	FALSE	FALSE	ukb-saige-153	16	75256360	0.024	387318	0.34	Colorectal cancer || id:ukb-saige-153	Colorectal cancer	Colorectal cancer || ||	TRUE	MedicineITLab	0.0410156	1732	7.40457e-36	CTRB1	TRUE	reported	finn-pQTL-R10-v1-CTRB1	2	TRUE	0.0859187	162.611	195.968	163.59
rs545634	A	G	A	G	-0.494265	-0.035	0.116547	0.099	FALSE	FALSE	FALSE	ukb-saige-153	1	15770102	0.036	387318	0.34	Colorectal cancer || id:ukb-saige-153	Colorectal cancer	Colorectal cancer || ||	TRUE	MedicineITLab	0.0519023	1732	5.44252e-21	CTRC	TRUE	reported	finn-pQTL-R10-v1-CTRC	2	TRUE	0.0503077	91.6426	195.968	90.6873
rs1293316	G	A	G	A	0.631975	0.022	0.223593	0.27	FALSE	FALSE	FALSE	ukb-saige-153	8	11690915	0.024	387318	0.36	Colorectal cancer || id:ukb-saige-153	Colorectal cancer	Colorectal cancer || ||	TRUE	MedicineITLab	0.0383604	1732	9.29822e-57	CTSB	TRUE	reported	finn-pQTL-R10-v1-CTSB	2	TRUE	0.138668	278.518	195.968	271.415
rs4841602	G	A	G	A	-0.537122	0.0048	0.144891	0.092	FALSE	FALSE	FALSE	ukb-saige-153	8	11729422	0.038	387318	0.9	Colorectal cancer || id:ukb-saige-153	Colorectal cancer	Colorectal cancer || ||	TRUE	MedicineITLab	0.0465894	1732	1.11148e-29	CTSB	TRUE	reported	finn-pQTL-R10-v1-CTSB	2	TRUE	0.0714889	133.198	195.968	132.914
rs11019400	G	A	G	A	1.1563	0.017	0.075026	0.093	FALSE	FALSE	FALSE	ukb-saige-153	11	88070858	0.037	387318	0.64	Colorectal cancer || id:ukb-saige-153	Colorectal cancer	Colorectal cancer || ||	TRUE	MedicineITLab	0.0591394	1732	4.48849e-77	CTSC	TRUE	reported	finn-pQTL-R10-v1-CTSC	2	TRUE	0.185572	394.19	195.968	382.285
rs111959857	G	A	G	A	-0.75145	-0.0047	0.0590466	0.072	FALSE	FALSE	FALSE	ukb-saige-153	11	88051032	0.042	387318	0.91	Colorectal cancer || id:ukb-saige-153	Colorectal cancer	Colorectal cancer || ||	TRUE	MedicineITLab	0.0703187	1732	7.40457e-26	CTSC	TRUE	reported	finn-pQTL-R10-v1-CTSC	2	TRUE	0.062747	115.82	195.968	114.198
rs189950686	A	G	A	G	0.469731	-0.8	0.0633634	0.00031	FALSE	FALSE	FALSE	ukb-saige-153	11	88176050	0.78	387318	0.3	Colorectal cancer || id:ukb-saige-153	Colorectal cancer	Colorectal cancer || ||	TRUE	MedicineITLab	0.0689047	1732	1.27879e-11	CTSC	TRUE	reported	finn-pQTL-R10-v1-CTSC	2	TRUE	0.0261902	46.5275	195.968	46.473
rs7123587	A	C	A	C	0.21316	-0.051	0.659361	0.65	FALSE	FALSE	FALSE	ukb-saige-153	11	1681922	0.022	387318	0.022	Colorectal cancer || id:ukb-saige-153	Colorectal cancer	Colorectal cancer || ||	TRUE	MedicineITLab	0.0360277	1732	3.95385e-09	CTSD	TRUE	reported	finn-pQTL-R10-v1-CTSD	2	TRUE	0.0204108	36.0463	195.968	35.0057
rs8839	G	T	G	T	-0.503796	-0.0056	0.120115	0.16	FALSE	FALSE	FALSE	ukb-saige-153	11	1774136	0.029	387318	0.85	Colorectal cancer || id:ukb-saige-153	Colorectal cancer	Colorectal cancer || ||	TRUE	MedicineITLab	0.0514223	1732	4.2924e-22	CTSD	TRUE	reported	finn-pQTL-R10-v1-CTSD	2	TRUE	0.0536491	98.0746	195.968	95.9857
rs41302235	G	A	G	A	-0.725114	0.038	0.227671	0.19	FALSE	FALSE	FALSE	ukb-saige-153	1	206328803	0.027	387318	0.16	Colorectal cancer || id:ukb-saige-153	Colorectal cancer	Colorectal cancer || ||	TRUE	MedicineITLab	0.0397326	1732	3.43005e-68	CTSE	TRUE	reported	finn-pQTL-R10-v1-CTSE	2	TRUE	0.184907	392.456	195.968	333.057
rs41303986	T	C	T	C	-0.660818	-0.064	0.0384233	0.048	FALSE	FALSE	FALSE	ukb-saige-153	1	206643795	0.057	387318	0.26	Colorectal cancer || id:ukb-saige-153	Colorectal cancer	Colorectal cancer || ||	TRUE	MedicineITLab	0.086766	1732	4.27563e-14	CTSE	TRUE	reported	finn-pQTL-R10-v1-CTSE	2	TRUE	0.032268	57.6851	195.968	58.0049
rs1791679	A	C	A	C	0.225703	0.011	0.267217	0.3	FALSE	FALSE	FALSE	ukb-saige-153	11	66337874	0.023	387318	0.64	Colorectal cancer || id:ukb-saige-153	Colorectal cancer	Colorectal cancer || ||	TRUE	MedicineITLab	0.0383174	1732	4.62083e-09	CTSF	TRUE	reported	finn-pQTL-R10-v1-CTSF	2	TRUE	0.0199501	35.2162	195.968	34.6963
rs75875328	T	C	T	C	-0.730733	-0.14	0.0411934	0.0067	FALSE	FALSE	FALSE	ukb-saige-153	11	67138032	0.13	387318	0.28	Colorectal cancer || id:ukb-saige-153	Colorectal cancer	Colorectal cancer || ||	TRUE	MedicineITLab	0.0820007	1732	1.24882e-18	CTSF	TRUE	reported	finn-pQTL-R10-v1-CTSF	2	TRUE	0.04218	76.1848	195.968	79.4113
rs28534575	G	T	G	T	0.267182	0.0073	0.269496	0.23	FALSE	FALSE	FALSE	ukb-saige-153	15	78923845	0.026	387318	0.78	Colorectal cancer || id:ukb-saige-153	Colorectal cancer	Colorectal cancer || ||	TRUE	MedicineITLab	0.0378967	1732	2.57099e-12	CTSH	TRUE	reported	finn-pQTL-R10-v1-CTSH	2	TRUE	0.0281073	50.0319	195.968	49.7063
rs3784539	T	C	T	C	-0.712797	-0.00089	0.169014	0.13	FALSE	FALSE	FALSE	ukb-saige-153	15	79219188	0.032	387318	0.98	Colorectal cancer || id:ukb-saige-153	Colorectal cancer	Colorectal cancer || ||	TRUE	MedicineITLab	0.0409889	1732	1.4952e-62	CTSH	TRUE	reported	finn-pQTL-R10-v1-CTSH	2	TRUE	0.142718	288.005	195.968	302.412
rs62013200	T	G	T	G	1.21271	-0.0036	0.166355	0.089	FALSE	FALSE	FALSE	ukb-saige-153	15	79230737	0.037	387318	0.92	Colorectal cancer || id:ukb-saige-153	Colorectal cancer	Colorectal cancer || ||	TRUE	MedicineITLab	0.0349952	1732	2.7227e-200	CTSH	TRUE	reported	finn-pQTL-R10-v1-CTSH	2	TRUE	0.407907	1191.84	195.968	1200.87
rs8028378	C	T	C	T	-0.219781	-0.016	0.760232	0.8	FALSE	FALSE	FALSE	ukb-saige-153	15	78386264	0.027	387318	0.55	Colorectal cancer || id:ukb-saige-153	Colorectal cancer	Colorectal cancer || ||	TRUE	MedicineITLab	0.0394077	1732	2.83263e-08	CTSH	TRUE	reported	finn-pQTL-R10-v1-CTSH	2	TRUE	0.0176095	31.0106	195.968	31.1041
rs10305664	C	A	C	A	-0.418675	-0.038	0.368901	0.35	FALSE	FALSE	FALSE	ukb-saige-153	1	150839686	0.022	387318	0.093	Colorectal cancer || id:ukb-saige-153	Colorectal cancer	Colorectal cancer || ||	TRUE	MedicineITLab	0.0345266	1732	1.53957e-32	CTSS	TRUE	reported	finn-pQTL-R10-v1-CTSS	2	TRUE	0.081619	153.75	195.968	147.044
rs112175941	A	T	A	T	-0.452622	-0.03	0.133319	0.17	FALSE	TRUE	FALSE	ukb-saige-153	1	150558293	0.029	387318	0.29	Colorectal cancer || id:ukb-saige-153	Colorectal cancer	Colorectal cancer || ||	TRUE	MedicineITLab	0.048952	1732	6.62369e-20	CTSS	TRUE	reported	finn-pQTL-R10-v1-CTSS	2	TRUE	0.0473427	85.973	195.968	85.493
rs10817163	A	T	A	T	0.302744	0.0089	0.249089	0.22	FALSE	TRUE	FALSE	ukb-saige-153	9	99902524	0.026	387318	0.73	Colorectal cancer || id:ukb-saige-153	Colorectal cancer	Colorectal cancer || ||	TRUE	MedicineITLab	0.0392075	1732	1.93063e-14	CTSV	TRUE	reported	finn-pQTL-R10-v1-CTSV	2	TRUE	0.0342866	61.4217	195.968	59.6229
rs148370779	T	C	T	C	-1.53899	0.039	0.00993183	0.01	FALSE	FALSE	FALSE	ukb-saige-153	20	57602212	0.11	387318	0.72	Colorectal cancer || id:ukb-saige-153	Colorectal cancer	Colorectal cancer || ||	TRUE	MedicineITLab	0.169967	1732	3.59418e-19	CTSZ	TRUE	reported	finn-pQTL-R10-v1-CTSZ	2	TRUE	0.0465796	84.5196	195.968	81.9865
rs3117604	C	T	C	T	0.254757	0.019	0.280118	0.29	FALSE	FALSE	FALSE	ukb-saige-153	4	74734668	0.024	387318	0.41	Colorectal cancer || id:ukb-saige-153	Colorectal cancer	Colorectal cancer || ||	TRUE	MedicineITLab	0.0369242	1732	7.29794e-12	CXCL1	TRUE	reported	finn-pQTL-R10-v1-CXCL1	2	TRUE	0.0261749	46.4997	195.968	47.6025
rs12450565	T	C	T	C	-0.305293	0.012	0.195053	0.21	FALSE	FALSE	FALSE	ukb-saige-153	17	4667029	0.026	387318	0.65	Colorectal cancer || id:ukb-saige-153	Colorectal cancer	Colorectal cancer || ||	TRUE	MedicineITLab	0.042988	1732	1.79143e-12	CXCL16	TRUE	reported	finn-pQTL-R10-v1-CXCL16	2	TRUE	0.0292674	52.1591	195.968	50.4358
rs352046	C	G	C	G	-0.575884	0.013	0.885763	0.88	FALSE	TRUE	FALSE	ukb-saige-153	4	74864550	0.032	387318	0.68	Colorectal cancer || id:ukb-saige-153	Colorectal cancer	Colorectal cancer || ||	TRUE	MedicineITLab	0.0513606	1732	3.23817e-28	CXCL5	TRUE	reported	finn-pQTL-R10-v1-CXCL5	2	TRUE	0.0671157	124.464	195.968	125.722
rs16850073	T	C	T	C	0.454396	-0.00088	0.381168	0.38	FALSE	FALSE	FALSE	ukb-saige-153	4	74703999	0.022	387318	0.97	Colorectal cancer || id:ukb-saige-153	Colorectal cancer	Colorectal cancer || ||	TRUE	MedicineITLab	0.0330372	1732	6.30231e-41	CXCL6	TRUE	reported	finn-pQTL-R10-v1-CXCL6	2	TRUE	0.0974066	186.699	195.968	189.174
rs3897382	G	A	G	A	0.266739	-0.054	0.63719	0.6	FALSE	FALSE	FALSE	ukb-saige-153	11	7694464	0.022	387318	0.013	Colorectal cancer || id:ukb-saige-153	Colorectal cancer	Colorectal cancer || ||	TRUE	MedicineITLab	0.0351909	1732	5.61048e-14	CYB5R2	TRUE	reported	finn-pQTL-R10-v1-CYB5R2	2	TRUE	0.0328966	58.847	195.968	57.4529
rs7933428	C	T	C	T	-0.300433	0.0047	0.10983	0.11	FALSE	FALSE	FALSE	ukb-saige-153	11	7607536	0.034	387318	0.89	Colorectal cancer || id:ukb-saige-153	Colorectal cancer	Colorectal cancer || ||	TRUE	MedicineITLab	0.054036	1732	3.12148e-08	CYB5R2	TRUE	reported	finn-pQTL-R10-v1-CYB5R2	2	TRUE	0.017649	31.0813	195.968	30.9121
rs11722554	A	G	A	G	-1.58928	-0.032	0.0626443	0.037	FALSE	FALSE	FALSE	ukb-saige-153	4	5016883	0.056	387318	0.57	Colorectal cancer || id:ukb-saige-153	Colorectal cancer	Colorectal cancer || ||	TRUE	MedicineITLab	0.0579134	1732	6.08135e-138	CYTL1	TRUE	reported	finn-pQTL-R10-v1-CYTL1	2	TRUE	0.296631	729.592	195.968	753.083
rs148608500	T	C	T	C	-0.531927	-0.0084	0.084667	0.053	FALSE	FALSE	FALSE	ukb-saige-153	4	5002277	0.049	387318	0.86	Colorectal cancer || id:ukb-saige-153	Colorectal cancer	Colorectal cancer || ||	TRUE	MedicineITLab	0.0610593	1732	6.86752e-18	CYTL1	TRUE	reported	finn-pQTL-R10-v1-CYTL1	2	TRUE	0.0438558	79.3506	195.968	75.8928
rs34772505	T	C	T	C	0.215867	0.013	0.366021	0.43	FALSE	FALSE	FALSE	ukb-saige-153	15	64276772	0.022	387318	0.54	Colorectal cancer || id:ukb-saige-153	Colorectal cancer	Colorectal cancer || ||	TRUE	MedicineITLab	0.0340911	1732	3.07525e-10	DAPK2	TRUE	reported	finn-pQTL-R10-v1-DAPK2	2	TRUE	0.0216264	38.2406	195.968	40.095
rs1611115	C	T	C	T	1.14372	-0.031	0.841224	0.79	FALSE	FALSE	FALSE	ukb-saige-153	9	136500515	0.026	387318	0.24	Colorectal cancer || id:ukb-saige-153	Colorectal cancer	Colorectal cancer || ||	TRUE	MedicineITLab	0.037517	1732	9.7499e-164	DBH	TRUE	reported	finn-pQTL-R10-v1-DBH	2	TRUE	0.349435	929.225	195.968	929.358
rs7857468	A	C	A	C	0.730313	-0.0018	0.165217	0.21	FALSE	FALSE	FALSE	ukb-saige-153	9	136585380	0.026	387318	0.94	Colorectal cancer || id:ukb-saige-153	Colorectal cancer	Colorectal cancer || ||	TRUE	MedicineITLab	0.0418377	1732	5.61694e-63	DBH	TRUE	reported	finn-pQTL-R10-v1-DBH	2	TRUE	0.147122	298.425	195.968	304.707
rs78672582	C	T	C	T	-0.315714	0.042	0.167397	0.2	FALSE	FALSE	FALSE	ukb-saige-153	2	120138481	0.026	387318	0.12	Colorectal cancer || id:ukb-saige-153	Colorectal cancer	Colorectal cancer || ||	TRUE	MedicineITLab	0.0447779	1732	2.56389e-12	DBI	TRUE	reported	finn-pQTL-R10-v1-DBI	2	TRUE	0.0277845	49.441	195.968	49.7119
rs9838238	C	T	C	T	-0.70889	0.064	0.067038	0.05	FALSE	FALSE	FALSE	ukb-saige-153	3	98600385	0.049	387318	0.19	Colorectal cancer || id:ukb-saige-153	Colorectal cancer	Colorectal cancer || ||	TRUE	MedicineITLab	0.066394	1732	8.1358e-26	DCBLD2	TRUE	reported	finn-pQTL-R10-v1-DCBLD2	2	TRUE	0.0628598	116.042	195.968	113.999
rs9807459	A	G	A	G	0.482726	-0.013	0.255947	0.31	FALSE	FALSE	FALSE	ukb-saige-153	18	49481736	0.023	387318	0.57	Colorectal cancer || id:ukb-saige-153	Colorectal cancer	Colorectal cancer || ||	TRUE	MedicineITLab	0.0369316	1732	2.65583e-37	DCC	TRUE	reported	finn-pQTL-R10-v1-DCC	2	TRUE	0.0887535	168.498	195.968	170.846
rs18582	G	A	G	A	-0.22726	-0.0024	0.39261	0.38	FALSE	FALSE	FALSE	ukb-saige-153	1	85794819	0.022	387318	0.91	Colorectal cancer || id:ukb-saige-153	Colorectal cancer	Colorectal cancer || ||	TRUE	MedicineITLab	0.0346701	1732	7.32656e-11	DDAH1	TRUE	reported	finn-pQTL-R10-v1-DDAH1	2	TRUE	0.0246323	43.6901	195.968	42.9671
rs117155175	G	C	G	C	-1.21805	-0.07	0.00727936	0.0097	FALSE	TRUE	FALSE	ukb-saige-153	7	50115277	0.11	387318	0.53	Colorectal cancer || id:ukb-saige-153	Colorectal cancer	Colorectal cancer || ||	TRUE	MedicineITLab	0.199312	1732	1.21843e-09	DDC	TRUE	reported	finn-pQTL-R10-v1-DDC	2	TRUE	0.0214427	37.9088	195.968	37.3477
rs79666456	A	G	A	G	-1.53252	0.041	0.0106032	0.016	FALSE	FALSE	FALSE	ukb-saige-153	7	50574992	0.086	387318	0.63	Colorectal cancer || id:ukb-saige-153	Colorectal cancer	Colorectal cancer || ||	TRUE	MedicineITLab	0.163271	1732	1.88408e-20	DDC	TRUE	reported	finn-pQTL-R10-v1-DDC	2	TRUE	0.0492776	89.669	195.968	88.1037
rs1006771	T	G	T	G	-0.377087	-0.013	0.7	0.64	FALSE	FALSE	FALSE	ukb-saige-153	22	24314006	0.022	387318	0.56	Colorectal cancer || id:ukb-saige-153	Colorectal cancer	Colorectal cancer || ||	TRUE	MedicineITLab	0.0361733	1732	1.01719e-24	DDT	TRUE	reported	finn-pQTL-R10-v1-DDT	2	TRUE	0.0597217	109.881	195.968	108.669
rs7045087	C	T	C	T	0.214087	-0.003	0.294267	0.3	FALSE	FALSE	FALSE	ukb-saige-153	9	32455262	0.023	387318	0.9	Colorectal cancer || id:ukb-saige-153	Colorectal cancer	Colorectal cancer || ||	TRUE	MedicineITLab	0.0371775	1732	1.0021e-08	DDX58	TRUE	reported	finn-pQTL-R10-v1-DDX58	2	TRUE	0.0190367	33.5727	195.968	33.1604
rs10734190	C	T	C	T	0.323937	0.002	0.818081	0.85	FALSE	FALSE	FALSE	ukb-saige-153	11	12001587	0.03	387318	0.95	Colorectal cancer || id:ukb-saige-153	Colorectal cancer	Colorectal cancer || ||	TRUE	MedicineITLab	0.0442195	1732	3.62827e-13	DKK3	TRUE	reported	finn-pQTL-R10-v1-DKK3	2	TRUE	0.0312338	55.7767	195.968	53.6653
rs11022114	A	G	A	G	0.421059	-0.046	0.353305	0.31	FALSE	FALSE	FALSE	ukb-saige-153	11	12038874	0.023	387318	0.049	Colorectal cancer || id:ukb-saige-153	Colorectal cancer	Colorectal cancer || ||	TRUE	MedicineITLab	0.0343895	1732	4.07662e-33	DKK3	TRUE	reported	finn-pQTL-R10-v1-DKK3	2	TRUE	0.081015	152.512	195.968	149.911
rs57897109	A	G	A	G	-0.760045	-0.1	0.0320167	0.041	FALSE	FALSE	FALSE	ukb-saige-153	19	49658084	0.054	387318	0.064	Colorectal cancer || id:ukb-saige-153	Colorectal cancer	Colorectal cancer || ||	TRUE	MedicineITLab	0.0937791	1732	9.90148e-16	DKKL1	TRUE	reported	finn-pQTL-R10-v1-DKKL1	2	TRUE	0.0358058	64.2443	195.968	65.685
rs8109880	A	C	A	C	-1.01564	-0.07	0.474339	0.5	FALSE	FALSE	FALSE	ukb-saige-153	19	49871070	0.021	387318	0.001	Colorectal cancer || id:ukb-saige-153	Colorectal cancer	Colorectal cancer || ||	TRUE	MedicineITLab	0.023659	1732	1e-200	DKKL1	TRUE	reported	finn-pQTL-R10-v1-DKKL1	2	TRUE	0.514404	1832.63	195.968	1842.84
rs61993018	A	G	A	G	0.319341	-0.029	0.103494	0.081	FALSE	FALSE	FALSE	ukb-saige-153	14	101109895	0.039	387318	0.45	Colorectal cancer || id:ukb-saige-153	Colorectal cancer	Colorectal cancer || ||	TRUE	MedicineITLab	0.0554601	1732	1.00496e-08	DLK1	TRUE	reported	finn-pQTL-R10-v1-DLK1	2	TRUE	0.0189238	33.3696	195.968	33.1549
rs4710790	C	A	C	A	0.210331	0.0045	0.437484	0.41	FALSE	FALSE	FALSE	ukb-saige-153	6	170588232	0.022	387318	0.84	Colorectal cancer || id:ukb-saige-153	Colorectal cancer	Colorectal cancer || ||	TRUE	MedicineITLab	0.0340607	1732	8.21713e-10	DLL1	TRUE	reported	finn-pQTL-R10-v1-DLL1	2	TRUE	0.0217738	38.5071	195.968	38.1329
rs12668458	C	T	C	T	0.251584	-0.017	0.41905	0.46	FALSE	FALSE	FALSE	ukb-saige-153	7	157145474	0.022	387318	0.42	Colorectal cancer || id:ukb-saige-153	Colorectal cancer	Colorectal cancer || ||	TRUE	MedicineITLab	0.035941	1483	3.86901e-12	DNAJB6	TRUE	reported	finn-pQTL-R10-v1-DNAJB6	2	TRUE	0.0308177	47.0923	195.968	48.9988
rs35565740	C	G	C	G	-0.301923	0.013	0.29108	0.22	FALSE	TRUE	FALSE	ukb-saige-153	2	230309810	0.026	387318	0.62	Colorectal cancer || id:ukb-saige-153	Colorectal cancer	Colorectal cancer || ||	TRUE	MedicineITLab	0.0371407	1732	8.14892e-16	DNER	TRUE	reported	finn-pQTL-R10-v1-DNER	2	TRUE	0.0376211	67.6289	195.968	66.0834
rs62193239	A	G	A	G	-0.244143	0.036	0.268304	0.33	FALSE	FALSE	FALSE	ukb-saige-153	2	230585725	0.023	387318	0.12	Colorectal cancer || id:ukb-saige-153	Colorectal cancer	Colorectal cancer || ||	TRUE	MedicineITLab	0.0377274	1732	1.26209e-10	DNER	TRUE	reported	finn-pQTL-R10-v1-DNER	2	TRUE	0.0234033	41.4579	195.968	41.8769
rs12380222	G	T	G	T	-0.241669	-0.0016	0.346796	0.32	FALSE	FALSE	FALSE	ukb-saige-153	9	130969168	0.023	387318	0.94	Colorectal cancer || id:ukb-saige-153	Colorectal cancer	Colorectal cancer || ||	TRUE	MedicineITLab	0.0354102	1732	1.21367e-11	DNM1	TRUE	reported	finn-pQTL-R10-v1-DNM1	2	TRUE	0.0264603	47.0205	195.968	46.5785
rs75660024	G	A	G	A	-0.677519	-0.062	0.0736766	0.11	FALSE	FALSE	FALSE	ukb-saige-153	6	43193281	0.035	387318	0.074	Colorectal cancer || id:ukb-saige-153	Colorectal cancer	Colorectal cancer || ||	TRUE	MedicineITLab	0.0632856	1732	6.08695e-26	DNPH1	TRUE	reported	finn-pQTL-R10-v1-DNPH1	2	TRUE	0.0626564	115.641	195.968	114.613
rs2437954	G	A	G	A	-0.367856	-0.033	0.24872	0.24	FALSE	FALSE	FALSE	ukb-saige-153	16	89641661	0.025	387318	0.2	Colorectal cancer || id:ukb-saige-153	Colorectal cancer	Colorectal cancer || ||	TRUE	MedicineITLab	0.038682	1732	6.14328e-21	DPEP1	TRUE	reported	finn-pQTL-R10-v1-DPEP1	2	TRUE	0.0505706	92.1471	195.968	90.4353
rs258341	C	T	C	T	0.823847	0.053	0.561402	0.58	FALSE	FALSE	FALSE	ukb-saige-153	16	89691142	0.022	387318	0.015	Colorectal cancer || id:ukb-saige-153	Colorectal cancer	Colorectal cancer || ||	TRUE	MedicineITLab	0.0281715	1732	4.20727e-153	DPEP1	TRUE	reported	finn-pQTL-R10-v1-DPEP1	2	TRUE	0.334244	868.55	195.968	855.211
rs56361264	A	G	A	G	0.294503	0.011	0.259395	0.3	FALSE	FALSE	FALSE	ukb-saige-153	16	89036743	0.024	387318	0.64	Colorectal cancer || id:ukb-saige-153	Colorectal cancer	Colorectal cancer || ||	TRUE	MedicineITLab	0.0392649	1732	1.01135e-13	DPEP1	TRUE	reported	finn-pQTL-R10-v1-DPEP1	2	TRUE	0.033324	59.638	195.968	56.2562
rs1124324	T	C	T	C	0.304339	0.076	0.147822	0.11	FALSE	FALSE	FALSE	ukb-saige-153	16	67897487	0.034	387318	0.026	Colorectal cancer || id:ukb-saige-153	Colorectal cancer	Colorectal cancer || ||	TRUE	MedicineITLab	0.0488646	1732	5.90976e-10	DPEP2	TRUE	reported	finn-pQTL-R10-v1-DPEP2	2	TRUE	0.0233354	41.3347	195.968	38.7906
rs13015258	G	T	G	T	-0.276578	0.0066	0.512174	0.62	FALSE	FALSE	FALSE	ukb-saige-153	2	162930725	0.022	387318	0.76	Colorectal cancer || id:ukb-saige-153	Colorectal cancer	Colorectal cancer || ||	TRUE	MedicineITLab	0.0333764	1732	2.30728e-16	DPP4	TRUE	reported	finn-pQTL-R10-v1-DPP4	2	TRUE	0.038225	68.7575	195.968	68.6683
rs3800578	C	T	C	T	0.289017	-0.021	0.302355	0.28	FALSE	FALSE	FALSE	ukb-saige-153	7	154673522	0.024	387318	0.38	Colorectal cancer || id:ukb-saige-153	Colorectal cancer	Colorectal cancer || ||	TRUE	MedicineITLab	0.0367817	1732	6.82339e-15	DPP6	TRUE	reported	finn-pQTL-R10-v1-DPP6	2	TRUE	0.0352394	63.191	195.968	61.7424
rs117515860	A	G	A	G	-0.72607	0.014	0.0197007	0.015	FALSE	FALSE	FALSE	ukb-saige-153	9	139366947	0.087	387318	0.87	Colorectal cancer || id:ukb-saige-153	Colorectal cancer	Colorectal cancer || ||	TRUE	MedicineITLab	0.120942	1732	2.3485e-09	DPP7	TRUE	reported	finn-pQTL-R10-v1-DPP7	2	TRUE	0.0203623	35.959	195.968	36.0415
rs117705975	T	C	T	C	-0.808208	-0.084	0.0195954	0.029	FALSE	FALSE	FALSE	ukb-saige-153	9	139425696	0.069	387318	0.22	Colorectal cancer || id:ukb-saige-153	Colorectal cancer	Colorectal cancer || ||	TRUE	MedicineITLab	0.1231	1732	6.83912e-11	DPP7	TRUE	reported	finn-pQTL-R10-v1-DPP7	2	TRUE	0.0250978	44.537	195.968	43.1053
rs142585377	A	G	A	G	-0.603757	0.00084	0.0309256	0.017	FALSE	FALSE	FALSE	ukb-saige-153	9	140285689	0.089	387318	0.99	Colorectal cancer || id:ukb-saige-153	Colorectal cancer	Colorectal cancer || ||	TRUE	MedicineITLab	0.101384	1732	3.14015e-09	DPP7	TRUE	reported	finn-pQTL-R10-v1-DPP7	2	TRUE	0.0218489	38.6429	195.968	35.4638
rs150267769	A	G	A	G	-1.15567	0.15	0.0286861	0.012	FALSE	FALSE	FALSE	ukb-saige-153	9	140008443	0.099	387318	0.13	Colorectal cancer || id:ukb-saige-153	Colorectal cancer	Colorectal cancer || ||	TRUE	MedicineITLab	0.0988582	1732	1.93019e-30	DPP7	TRUE	reported	finn-pQTL-R10-v1-DPP7	2	TRUE	0.0744267	139.112	195.968	136.66
rs1018454	C	A	C	A	0.46295	0.0037	0.541018	0.58	FALSE	FALSE	FALSE	ukb-saige-153	1	168697761	0.022	387318	0.86	Colorectal cancer || id:ukb-saige-153	Colorectal cancer	Colorectal cancer || ||	TRUE	MedicineITLab	0.0324573	1732	1.0067e-43	DPT	TRUE	reported	finn-pQTL-R10-v1-DPT	2	TRUE	0.10644	206.076	195.968	203.443
rs981258	A	T	A	T	0.217469	-0.013	0.589684	0.61	FALSE	TRUE	FALSE	ukb-saige-153	1	168918670	0.022	387318	0.55	Colorectal cancer || id:ukb-saige-153	Colorectal cancer	Colorectal cancer || ||	TRUE	MedicineITLab	0.0338331	1732	1.67082e-10	DPT	TRUE	reported	finn-pQTL-R10-v1-DPT	2	TRUE	0.0228856	40.5194	195.968	41.3153
rs55706902	C	T	C	T	-0.36513	-0.033	0.283098	0.19	FALSE	FALSE	FALSE	ukb-saige-153	1	11724708	0.027	387318	0.23	Colorectal cancer || id:ukb-saige-153	Colorectal cancer	Colorectal cancer || ||	TRUE	MedicineITLab	0.0373337	1732	5.03733e-22	DRAXIN	TRUE	reported	finn-pQTL-R10-v1-DRAXIN	2	TRUE	0.0541155	98.9759	195.968	95.6518
rs2577081	T	G	T	G	-0.452671	0.025	0.895635	0.88	FALSE	FALSE	FALSE	ukb-saige-153	18	28706285	0.033	387318	0.46	Colorectal cancer || id:ukb-saige-153	Colorectal cancer	Colorectal cancer || ||	TRUE	MedicineITLab	0.0537564	1732	7.73927e-17	DSC2	TRUE	reported	finn-pQTL-R10-v1-DSC2	2	TRUE	0.0383073	68.9114	195.968	70.9096
rs78111814	C	T	C	T	0.893439	-0.15	0.0698252	0.039	FALSE	FALSE	FALSE	ukb-saige-153	21	42060498	0.058	387318	0.01	Colorectal cancer || id:ukb-saige-153	Colorectal cancer	Colorectal cancer || ||	TRUE	MedicineITLab	0.0645464	1732	2.1062e-41	DSCAM	TRUE	reported	finn-pQTL-R10-v1-DSCAM	2	TRUE	0.10369	200.136	195.968	191.596
rs2704050	G	A	G	A	-0.260092	-0.065	0.443307	0.49	FALSE	FALSE	FALSE	ukb-saige-153	18	29095888	0.022	387318	0.0026	Colorectal cancer || id:ukb-saige-153	Colorectal cancer	Colorectal cancer || ||	TRUE	MedicineITLab	0.0332567	1732	9.0615e-15	DSG2	TRUE	reported	finn-pQTL-R10-v1-DSG2	2	TRUE	0.0333891	59.7584	195.968	61.164
rs71361351	A	G	A	G	-0.454405	0.042	0.0481139	0.032	FALSE	FALSE	FALSE	ukb-saige-153	18	29420127	0.063	387318	0.5	Colorectal cancer || id:ukb-saige-153	Colorectal cancer	Colorectal cancer || ||	TRUE	MedicineITLab	0.0794316	1732	1.24753e-08	DSG2	TRUE	reported	finn-pQTL-R10-v1-DSG2	2	TRUE	0.0189135	33.3511	195.968	32.7265
rs10084010	T	C	T	C	-0.389727	0.059	0.193096	0.17	FALSE	FALSE	FALSE	ukb-saige-153	18	29027745	0.028	387318	0.036	Colorectal cancer || id:ukb-saige-153	Colorectal cancer	Colorectal cancer || ||	TRUE	MedicineITLab	0.0415932	1732	2.18424e-20	DSG3	TRUE	reported	finn-pQTL-R10-v1-DSG3	2	TRUE	0.047331	85.9509	195.968	87.7963
rs45531831	T	C	T	C	-1.09153	-0.09	0.0303118	0.028	FALSE	FALSE	FALSE	ukb-saige-153	6	31938120	0.064	387318	0.16	Colorectal cancer || id:ukb-saige-153	Colorectal cancer	Colorectal cancer || ||	TRUE	MedicineITLab	0.0951763	1732	2.12765e-29	DXO	TRUE	reported	finn-pQTL-R10-v1-DXO	2	TRUE	0.0700398	130.295	195.968	131.527
rs35986488	A	G	A	G	-1.08594	-0.03	0.0517129	0.091	FALSE	FALSE	FALSE	ukb-saige-153	10	11797500	0.037	387318	0.42	Colorectal cancer || id:ukb-saige-153	Colorectal cancer	Colorectal cancer || ||	TRUE	MedicineITLab	0.0729876	1732	3.3136e-47	ECHDC3	TRUE	reported	finn-pQTL-R10-v1-ECHDC3	2	TRUE	0.115659	226.26	195.968	221.367
rs3737240	T	C	T	C	-0.650257	0.016	0.436347	0.39	FALSE	FALSE	FALSE	ukb-saige-153	1	150483355	0.022	387318	0.47	Colorectal cancer || id:ukb-saige-153	Colorectal cancer	Colorectal cancer || ||	TRUE	MedicineITLab	0.0303485	1732	1.59661e-90	ECM1	TRUE	reported	finn-pQTL-R10-v1-ECM1	2	TRUE	0.207991	454.318	195.968	459.088
rs260675	C	G	C	G	-1.8622	-0.095	0.993193	0.99	FALSE	TRUE	FALSE	ukb-saige-153	2	109600119	0.094	387318	0.31	Colorectal cancer || id:ukb-saige-153	Colorectal cancer	Colorectal cancer || ||	TRUE	MedicineITLab	0.204519	1732	2.30675e-19	EDAR	TRUE	reported	finn-pQTL-R10-v1-EDAR	2	TRUE	0.0468891	85.1088	195.968	82.9059
rs6750059	T	C	T	C	0.415243	-0.0053	0.794421	0.75	FALSE	FALSE	FALSE	ukb-saige-153	2	109611097	0.025	387318	0.83	Colorectal cancer || id:ukb-saige-153	Colorectal cancer	Colorectal cancer || ||	TRUE	MedicineITLab	0.0415121	1732	6.12915e-23	EDAR	TRUE	reported	finn-pQTL-R10-v1-EDAR	2	TRUE	0.0563202	103.249	195.968	100.059
rs12586813	A	G	A	G	-0.399633	-0.037	0.76715	0.67	FALSE	FALSE	FALSE	ukb-saige-153	14	21244479	0.023	387318	0.1	Colorectal cancer || id:ukb-saige-153	Colorectal cancer	Colorectal cancer || ||	TRUE	MedicineITLab	0.0395385	1732	2.24905e-23	EDDM3B	TRUE	reported	finn-pQTL-R10-v1-EDDM3B	2	TRUE	0.057057	104.681	195.968	102.16
rs7545078	G	T	G	T	-0.232122	-0.00031	0.649572	0.58	FALSE	FALSE	FALSE	ukb-saige-153	1	245133489	0.022	387318	0.99	Colorectal cancer || id:ukb-saige-153	Colorectal cancer	Colorectal cancer || ||	TRUE	MedicineITLab	0.0357937	1732	1.15489e-10	EFCAB2	TRUE	reported	finn-pQTL-R10-v1-EFCAB2	2	TRUE	0.0245295	43.5031	195.968	42.0552
rs146096867	T	C	T	C	0.469894	-0.057	0.0818232	0.084	FALSE	FALSE	FALSE	ukb-saige-153	2	233520579	0.039	387318	0.14	Colorectal cancer || id:ukb-saige-153	Colorectal cancer	Colorectal cancer || ||	TRUE	MedicineITLab	0.0617121	1732	4.33411e-14	EFHD1	TRUE	reported	finn-pQTL-R10-v1-EFHD1	2	TRUE	0.0331767	59.3651	195.968	57.9775
rs74557797	T	G	T	G	-0.347322	-0.00023	0.177729	0.092	FALSE	FALSE	FALSE	ukb-saige-153	9	139550503	0.04	387318	0.99	Colorectal cancer || id:ukb-saige-153	Colorectal cancer	Colorectal cancer || ||	TRUE	MedicineITLab	0.0441321	1732	6.19869e-15	EGFL7	TRUE	reported	finn-pQTL-R10-v1-EGFL7	2	TRUE	0.0352588	63.2271	195.968	61.9377
rs113400125	T	C	T	C	1.659	0.02	0.019326	0.026	FALSE	FALSE	FALSE	ukb-saige-153	5	38406251	0.067	387318	0.76	Colorectal cancer || id:ukb-saige-153	Colorectal cancer	Colorectal cancer || ||	TRUE	MedicineITLab	0.122057	1732	4.70435e-40	EGFLAM	TRUE	reported	finn-pQTL-R10-v1-EGFLAM	2	TRUE	0.104325	201.505	195.968	184.743
rs2561113	C	T	C	T	-0.481048	-0.03	0.184332	0.24	FALSE	FALSE	FALSE	ukb-saige-153	5	38349573	0.025	387318	0.23	Colorectal cancer || id:ukb-saige-153	Colorectal cancer	Colorectal cancer || ||	TRUE	MedicineITLab	0.0416675	1732	9.3476e-30	EGFLAM	TRUE	reported	finn-pQTL-R10-v1-EGFLAM	2	TRUE	0.0695859	129.387	195.968	133.285
rs655029	A	G	A	G	-0.221773	-0.025	0.739243	0.71	FALSE	FALSE	FALSE	ukb-saige-153	2	31477838	0.024	387318	0.29	Colorectal cancer || id:ukb-saige-153	Colorectal cancer	Colorectal cancer || ||	TRUE	MedicineITLab	0.0377534	1732	5.08288e-09	EHD3	TRUE	reported	finn-pQTL-R10-v1-EHD3	2	TRUE	0.0189614	33.4372	195.968	34.5068
rs11168215	C	A	C	A	0.371046	0.0053	0.251934	0.31	FALSE	FALSE	FALSE	ukb-saige-153	12	48129778	0.023	387318	0.82	Colorectal cancer || id:ukb-saige-153	Colorectal cancer	Colorectal cancer || ||	TRUE	MedicineITLab	0.0375719	1732	2.05258e-22	ENDOU	TRUE	reported	finn-pQTL-R10-v1-ENDOU	2	TRUE	0.0518934	94.6894	195.968	97.528
rs11794565	T	C	T	C	0.296728	0.04	0.537064	0.47	FALSE	FALSE	FALSE	ukb-saige-153	9	130601277	0.022	387318	0.065	Colorectal cancer || id:ukb-saige-153	Colorectal cancer	Colorectal cancer || ||	TRUE	MedicineITLab	0.0332848	1732	1.21171e-18	ENG	TRUE	reported	finn-pQTL-R10-v1-ENG	2	TRUE	0.0437818	79.2106	195.968	79.474
rs115863810	C	T	C	T	-0.715332	0.15	0.0286363	0.031	FALSE	FALSE	FALSE	ukb-saige-153	1	8738637	0.061	387318	0.017	Colorectal cancer || id:ukb-saige-153	Colorectal cancer	Colorectal cancer || ||	TRUE	MedicineITLab	0.0990989	1732	7.84332e-13	ENO1	TRUE	reported	finn-pQTL-R10-v1-ENO1	2	TRUE	0.0284672	50.6912	195.968	52.1048
rs13267597	G	T	G	T	-0.425353	0.018	0.343662	0.33	FALSE	FALSE	FALSE	ukb-saige-153	8	120654225	0.023	387318	0.43	Colorectal cancer || id:ukb-saige-153	Colorectal cancer	Colorectal cancer || ||	TRUE	MedicineITLab	0.0338429	1732	9.85598e-35	ENPP2	TRUE	reported	finn-pQTL-R10-v1-ENPP2	2	TRUE	0.0816184	153.749	195.968	157.966
rs2185108	T	C	T	C	-1.61745	-0.025	0.0643764	0.053	FALSE	FALSE	FALSE	ukb-saige-153	6	46054285	0.047	387318	0.6	Colorectal cancer || id:ukb-saige-153	Colorectal cancer	Colorectal cancer || ||	TRUE	MedicineITLab	0.0550374	1732	2.48313e-154	ENPP5	TRUE	reported	finn-pQTL-R10-v1-ENPP5	2	TRUE	0.315152	796.107	195.968	863.666
rs981636	A	G	A	G	-0.818867	-0.12	0.980637	0.99	FALSE	FALSE	FALSE	ukb-saige-153	6	46122033	0.14	387318	0.39	Colorectal cancer || id:ukb-saige-153	Colorectal cancer	Colorectal cancer || ||	TRUE	MedicineITLab	0.125968	1732	1.04383e-10	ENPP5	TRUE	reported	finn-pQTL-R10-v1-ENPP5	2	TRUE	0.0254646	45.205	195.968	42.2577
rs77643637	G	C	G	C	-0.612684	0.15	0.0275507	0.014	FALSE	TRUE	FALSE	ukb-saige-153	4	184990273	0.094	387318	0.12	Colorectal cancer || id:ukb-saige-153	Colorectal cancer	Colorectal cancer || ||	TRUE	MedicineITLab	0.104177	1732	4.87922e-09	ENPP6	TRUE	reported	finn-pQTL-R10-v1-ENPP6	2	TRUE	0.0201142	35.5119	195.968	34.5883
rs78293932	T	C	T	C	1.17972	-0.023	0.0204116	0.024	FALSE	FALSE	FALSE	ukb-saige-153	4	185139101	0.07	387318	0.75	Colorectal cancer || id:ukb-saige-153	Colorectal cancer	Colorectal cancer || ||	TRUE	MedicineITLab	0.117392	1732	3.92916e-23	ENPP6	TRUE	reported	finn-pQTL-R10-v1-ENPP6	2	TRUE	0.0556556	101.959	195.968	100.991
rs113551947	G	C	G	C	0.348421	0.029	0.0920516	0.098	FALSE	TRUE	FALSE	ukb-saige-153	17	77632444	0.036	387318	0.42	Colorectal cancer || id:ukb-saige-153	Colorectal cancer	Colorectal cancer || ||	TRUE	MedicineITLab	0.0581853	1732	2.57573e-09	ENPP7	TRUE	reported	finn-pQTL-R10-v1-ENPP7	2	TRUE	0.0202923	35.8328	195.968	35.8577
rs8076533	C	T	C	T	-0.948484	0.0092	0.624613	0.64	FALSE	FALSE	FALSE	ukb-saige-153	17	77704314	0.022	387318	0.68	Colorectal cancer || id:ukb-saige-153	Colorectal cancer	Colorectal cancer || ||	TRUE	MedicineITLab	0.0273174	1732	1e-200	ENPP7	TRUE	reported	finn-pQTL-R10-v1-ENPP7	2	TRUE	0.421872	1262.41	195.968	1205.54
rs117055703	A	G	A	G	-0.939587	0.05	0.0145067	0.015	FALSE	FALSE	FALSE	ukb-saige-153	9	140385764	0.092	387318	0.59	Colorectal cancer || id:ukb-saige-153	Colorectal cancer	Colorectal cancer || ||	TRUE	MedicineITLab	0.145089	1732	1.22453e-10	ENTPD2	TRUE	reported	finn-pQTL-R10-v1-ENTPD2	2	TRUE	0.0252421	44.7998	195.968	41.9377
rs34618694	A	G	A	G	-1.54035	-0.041	0.0227075	0.016	FALSE	FALSE	FALSE	ukb-saige-153	9	139946040	0.085	387318	0.63	Colorectal cancer || id:ukb-saige-153	Colorectal cancer	Colorectal cancer || ||	TRUE	MedicineITLab	0.110127	1732	3.39156e-42	ENTPD2	TRUE	reported	finn-pQTL-R10-v1-ENTPD2	2	TRUE	0.105308	203.627	195.968	195.637
rs45457700	T	G	T	G	-1.81755	0.0051	0.00755447	0.021	FALSE	FALSE	FALSE	ukb-saige-153	9	139943537	0.078	387318	0.95	Colorectal cancer || id:ukb-saige-153	Colorectal cancer	Colorectal cancer || ||	TRUE	MedicineITLab	0.194537	1732	2.78548e-20	ENTPD2	TRUE	reported	finn-pQTL-R10-v1-ENTPD2	2	TRUE	0.0495351	90.162	195.968	87.2908
rs12432592	C	T	C	T	-0.538026	-0.005	0.0481355	0.046	FALSE	FALSE	FALSE	ukb-saige-153	14	73869865	0.052	387318	0.93	Colorectal cancer || id:ukb-saige-153	Colorectal cancer	Colorectal cancer || ||	TRUE	MedicineITLab	0.0794121	1732	1.69863e-11	ENTPD5	TRUE	reported	finn-pQTL-R10-v1-ENTPD5	2	TRUE	0.0265263	47.141	195.968	45.9022
rs58639209	A	C	A	C	-0.850783	0.054	0.0798702	0.053	FALSE	FALSE	FALSE	ukb-saige-153	14	74467449	0.048	387318	0.26	Colorectal cancer || id:ukb-saige-153	Colorectal cancer	Colorectal cancer || ||	TRUE	MedicineITLab	0.0591827	1732	2.37794e-44	ENTPD5	TRUE	reported	finn-pQTL-R10-v1-ENTPD5	2	TRUE	0.10639	205.968	195.968	206.656
rs845984	A	G	A	G	2.02958	-0.029	0.9782	0.97	FALSE	FALSE	FALSE	ukb-saige-153	20	26137161	0.061	387318	0.63	Colorectal cancer || id:ukb-saige-153	Colorectal cancer	Colorectal cancer || ||	TRUE	MedicineITLab	0.108246	1732	1.4873e-71	ENTPD6	TRUE	reported	finn-pQTL-R10-v1-ENTPD6	2	TRUE	0.175682	368.704	195.968	351.551
rs3812577	T	C	T	C	-0.403609	-0.036	0.078274	0.13	FALSE	FALSE	FALSE	ukb-saige-153	9	139299637	0.031	387318	0.24	Colorectal cancer || id:ukb-saige-153	Colorectal cancer	Colorectal cancer || ||	TRUE	MedicineITLab	0.0626755	1732	1.54725e-10	ENTR1	TRUE	reported	finn-pQTL-R10-v1-ENTR1	2	TRUE	0.0235056	41.6435	195.968	41.4692
rs11767492	A	G	A	G	0.276713	0.0035	0.647235	0.74	FALSE	FALSE	FALSE	ukb-saige-153	7	143101736	0.025	387318	0.89	Colorectal cancer || id:ukb-saige-153	Colorectal cancer	Colorectal cancer || ||	TRUE	MedicineITLab	0.0346395	1732	2.47286e-15	EPHA1	TRUE	reported	finn-pQTL-R10-v1-EPHA1	2	TRUE	0.0349652	62.6816	195.968	63.814
rs314361	G	A	G	A	0.222577	0.0019	0.478717	0.52	FALSE	FALSE	FALSE	ukb-saige-153	7	100413005	0.021	387318	0.93	Colorectal cancer || id:ukb-saige-153	Colorectal cancer	Colorectal cancer || ||	TRUE	MedicineITLab	0.0337899	1732	5.93335e-11	EPHB4	TRUE	reported	finn-pQTL-R10-v1-EPHB4	2	TRUE	0.0247254	43.8593	195.968	43.3897
rs7789303	A	G	A	G	0.322673	0.025	0.747144	0.73	FALSE	FALSE	FALSE	ukb-saige-153	7	142552547	0.024	387318	0.3	Colorectal cancer || id:ukb-saige-153	Colorectal cancer	Colorectal cancer || ||	TRUE	MedicineITLab	0.0368634	1732	4.83059e-18	EPHB6	TRUE	reported	finn-pQTL-R10-v1-EPHB6	2	TRUE	0.0393399	70.845	195.968	76.6186
rs117607355	T	C	T	C	-0.601228	-0.16	0.0313057	0.0082	FALSE	FALSE	FALSE	ukb-saige-153	8	144740594	0.12	387318	0.17	Colorectal cancer || id:ukb-saige-153	Colorectal cancer	Colorectal cancer || ||	TRUE	MedicineITLab	0.0964402	1732	5.69246e-10	EPPK1	TRUE	reported	finn-pQTL-R10-v1-EPPK1	2	TRUE	0.0219239	38.7786	195.968	38.8653
rs17062686	A	G	A	G	0.477328	0.00086	0.0451094	0.053	FALSE	FALSE	FALSE	ukb-saige-153	8	144992900	0.048	387318	0.99	Colorectal cancer || id:ukb-saige-153	Colorectal cancer	Colorectal cancer || ||	TRUE	MedicineITLab	0.085986	1732	3.27718e-08	EPPK1	TRUE	reported	finn-pQTL-R10-v1-EPPK1	2	TRUE	0.0196284	34.637	195.968	30.8161
rs73375129	G	A	G	A	-0.616231	0.035	0.137588	0.14	FALSE	FALSE	FALSE	ukb-saige-153	8	144950276	0.031	387318	0.27	Colorectal cancer || id:ukb-saige-153	Colorectal cancer	Colorectal cancer || ||	TRUE	MedicineITLab	0.0476499	1732	1.38007e-36	EPPK1	TRUE	reported	finn-pQTL-R10-v1-EPPK1	2	TRUE	0.0901182	171.346	195.968	167.249
rs74344980	T	C	T	C	0.742059	0.035	0.0305518	0.013	FALSE	FALSE	FALSE	ukb-saige-153	17	37795141	0.096	387318	0.72	Colorectal cancer || id:ukb-saige-153	Colorectal cancer	Colorectal cancer || ||	TRUE	MedicineITLab	0.095972	1732	1.7832e-14	ERBB2	TRUE	reported	finn-pQTL-R10-v1-ERBB2	2	TRUE	0.0326188	58.3333	195.968	59.7844
rs13427822	G	A	G	A	0.231028	0.026	0.309333	0.27	FALSE	FALSE	FALSE	ukb-saige-153	2	213414265	0.024	387318	0.29	Colorectal cancer || id:ukb-saige-153	Colorectal cancer	Colorectal cancer || ||	TRUE	MedicineITLab	0.0371723	1732	6.41461e-10	ERBB4	TRUE	reported	finn-pQTL-R10-v1-ERBB4	2	TRUE	0.0228063	40.3757	195.968	38.6269
rs12541	C	T	C	T	-0.228404	0.029	0.235668	0.22	FALSE	FALSE	FALSE	ukb-saige-153	11	124623492	0.026	387318	0.26	Colorectal cancer || id:ukb-saige-153	Colorectal cancer	Colorectal cancer || ||	TRUE	MedicineITLab	0.0394277	1732	8.19785e-09	ESAM	TRUE	reported	finn-pQTL-R10-v1-ESAM	2	TRUE	0.018794	33.1365	195.968	33.5587
rs55812543	A	G	A	G	-0.90751	0.03	0.0388988	0.054	FALSE	FALSE	FALSE	ukb-saige-153	13	113745989	0.05	387318	0.55	Colorectal cancer || id:ukb-saige-153	Colorectal cancer	Colorectal cancer || ||	TRUE	MedicineITLab	0.0868175	1732	7.65949e-25	F10	TRUE	reported	finn-pQTL-R10-v1-F10	2	TRUE	0.0615798	113.524	195.968	109.267
rs4253276	C	G	C	G	-0.349705	-0.021	0.0754472	0.052	FALSE	TRUE	FALSE	ukb-saige-153	4	187163859	0.048	387318	0.67	Colorectal cancer || id:ukb-saige-153	Colorectal cancer	Colorectal cancer || ||	TRUE	MedicineITLab	0.0630265	1732	3.32713e-08	F11	TRUE	reported	finn-pQTL-R10-v1-F11	2	TRUE	0.0170612	30.0281	195.968	30.7863
rs6824705	T	C	T	C	0.462474	0.041	0.57267	0.58	FALSE	FALSE	FALSE	ukb-saige-153	4	187213889	0.022	387318	0.061	Colorectal cancer || id:ukb-saige-153	Colorectal cancer	Colorectal cancer || ||	TRUE	MedicineITLab	0.0325039	1732	1.57834e-43	F11	TRUE	reported	finn-pQTL-R10-v1-F11	2	TRUE	0.104682	202.275	195.968	202.443
rs1801020	G	A	G	A	1.20483	-0.023	0.73254	0.75	FALSE	FALSE	FALSE	ukb-saige-153	5	176836532	0.025	387318	0.36	Colorectal cancer || id:ukb-saige-153	Colorectal cancer	Colorectal cancer || ||	TRUE	MedicineITLab	0.0258973	1732	1e-200	F12	TRUE	reported	finn-pQTL-R10-v1-F12	2	TRUE	0.568816	2282.21	195.968	2164.43
rs189624789	C	A	C	A	-0.465954	0.061	0.0527408	0.051	FALSE	FALSE	FALSE	ukb-saige-153	5	176882583	0.049	387318	0.21	Colorectal cancer || id:ukb-saige-153	Colorectal cancer	Colorectal cancer || ||	TRUE	MedicineITLab	0.0765201	1732	1.39399e-09	F12	TRUE	reported	finn-pQTL-R10-v1-F12	2	TRUE	0.0216936	38.3621	195.968	37.0796
rs12134960	C	G	C	G	-0.44882	-0.011	0.226577	0.16	FALSE	TRUE	FALSE	ukb-saige-153	1	197009508	0.029	387318	0.7	Colorectal cancer || id:ukb-saige-153	Colorectal cancer	Colorectal cancer || ||	TRUE	MedicineITLab	0.0387959	1732	7.22437e-30	F13B	TRUE	reported	finn-pQTL-R10-v1-F13B	2	TRUE	0.0706004	131.417	195.968	133.836
rs3136516	A	G	A	G	-0.235137	0.0054	0.556888	0.53	FALSE	FALSE	FALSE	ukb-saige-153	11	46760756	0.021	387318	0.8	Colorectal cancer || id:ukb-saige-153	Colorectal cancer	Colorectal cancer || ||	TRUE	MedicineITLab	0.0338383	1732	5.19757e-12	F2	TRUE	reported	finn-pQTL-R10-v1-F2	2	TRUE	0.0272868	48.5305	195.968	48.2864
rs455249	G	C	G	C	-0.214905	0.0081	0.660574	0.65	FALSE	TRUE	FALSE	ukb-saige-153	5	75936380	0.022	387318	0.72	Colorectal cancer || id:ukb-saige-153	Colorectal cancer	Colorectal cancer || ||	TRUE	MedicineITLab	0.0350165	1732	1.03868e-09	F2R	TRUE	reported	finn-pQTL-R10-v1-F2R	2	TRUE	0.0207105	36.5868	195.968	37.6658
rs10493874	T	C	T	C	-0.286591	-0.015	0.60936	0.63	FALSE	FALSE	FALSE	ukb-saige-153	1	95266433	0.022	387318	0.52	Colorectal cancer || id:ukb-saige-153	Colorectal cancer	Colorectal cancer || ||	TRUE	MedicineITLab	0.0344807	1732	1.88408e-16	F3	TRUE	reported	finn-pQTL-R10-v1-F3	2	TRUE	0.0391026	70.4004	195.968	69.0833
rs17411572	C	T	C	T	-0.204277	0.018	0.387333	0.32	FALSE	FALSE	FALSE	ukb-saige-153	1	95091288	0.023	387318	0.42	Colorectal cancer || id:ukb-saige-153	Colorectal cancer	Colorectal cancer || ||	TRUE	MedicineITLab	0.0346329	1732	4.40656e-09	F3	TRUE	reported	finn-pQTL-R10-v1-F3	2	TRUE	0.0198051	34.9552	195.968	34.7905
rs2480953	A	G	A	G	-0.83825	-0.024	0.0855036	0.11	FALSE	FALSE	FALSE	ukb-saige-153	13	113753315	0.034	387318	0.47	Colorectal cancer || id:ukb-saige-153	Colorectal cancer	Colorectal cancer || ||	TRUE	MedicineITLab	0.0577594	1732	4.01976e-45	F7	TRUE	reported	finn-pQTL-R10-v1-F7	2	TRUE	0.109886	213.572	195.968	210.621
rs2241883	C	T	C	T	-0.337827	-0.032	0.469293	0.31	FALSE	FALSE	FALSE	ukb-saige-153	2	88424066	0.023	387318	0.17	Colorectal cancer || id:ukb-saige-153	Colorectal cancer	Colorectal cancer || ||	TRUE	MedicineITLab	0.0329771	1732	5.97035e-24	FABP1	TRUE	reported	finn-pQTL-R10-v1-FABP1	2	TRUE	0.0568483	104.275	195.968	104.945
rs2302231	T	G	T	G	-0.400039	-0.0084	0.68793	0.66	FALSE	FALSE	FALSE	ukb-saige-153	17	66526027	0.022	387318	0.71	Colorectal cancer || id:ukb-saige-153	Colorectal cancer	Colorectal cancer || ||	TRUE	MedicineITLab	0.0354146	1732	1.34246e-28	FAM20A	TRUE	reported	finn-pQTL-R10-v1-FAM20A	2	TRUE	0.0687117	127.642	195.968	127.597
rs76872216	C	T	C	T	-0.435046	-0.015	0.120151	0.12	FALSE	FALSE	FALSE	ukb-saige-153	17	66677817	0.034	387318	0.65	Colorectal cancer || id:ukb-saige-153	Colorectal cancer	Colorectal cancer || ||	TRUE	MedicineITLab	0.0514618	1732	5.90201e-17	FAM20A	TRUE	reported	finn-pQTL-R10-v1-FAM20A	2	TRUE	0.0400162	72.1138	195.968	71.4662
rs112642045	T	C	T	C	-1.08781	0.095	0.0121587	0.0088	FALSE	FALSE	FALSE	ukb-saige-153	21	42594725	0.12	387318	0.41	Colorectal cancer || id:ukb-saige-153	Colorectal cancer	Colorectal cancer || ||	TRUE	MedicineITLab	0.155467	1732	3.72392e-12	FAM3B	TRUE	reported	finn-pQTL-R10-v1-FAM3B	2	TRUE	0.0284257	50.6151	195.968	48.9587
rs57529409	T	C	T	C	-1.38255	-0.1	0.0386293	0.046	FALSE	FALSE	FALSE	ukb-saige-153	21	42718262	0.051	387318	0.048	Colorectal cancer || id:ukb-saige-153	Colorectal cancer	Colorectal cancer || ||	TRUE	MedicineITLab	0.0824443	1732	1.33875e-58	FAM3B	TRUE	reported	finn-pQTL-R10-v1-FAM3B	2	TRUE	0.141971	286.249	195.968	281.216
rs17143281	T	C	T	C	0.462461	-0.046	0.0476203	0.051	FALSE	FALSE	FALSE	ukb-saige-153	7	120965352	0.049	387318	0.35	Colorectal cancer || id:ukb-saige-153	Colorectal cancer	Colorectal cancer || ||	TRUE	MedicineITLab	0.0786155	1732	4.83894e-09	FAM3C	TRUE	reported	finn-pQTL-R10-v1-FAM3C	2	TRUE	0.0193991	34.2244	195.968	34.6046
rs59026856	G	C	G	C	-0.441511	-0.022	0.135859	0.096	FALSE	TRUE	FALSE	ukb-saige-153	3	58644362	0.036	387318	0.55	Colorectal cancer || id:ukb-saige-153	Colorectal cancer	Colorectal cancer || ||	TRUE	MedicineITLab	0.0496491	1732	1.4669e-18	FAM3D	TRUE	reported	finn-pQTL-R10-v1-FAM3D	2	TRUE	0.0457705	82.9811	195.968	79.0788
rs78455439	C	T	C	T	1.01915	-0.029	0.0118949	0.01	FALSE	FALSE	FALSE	ukb-saige-153	2	163034461	0.11	387318	0.79	Colorectal cancer || id:ukb-saige-153	Colorectal cancer	Colorectal cancer || ||	TRUE	MedicineITLab	0.153	1732	3.63999e-11	FAP	TRUE	reported	finn-pQTL-R10-v1-FAP	2	TRUE	0.0244158	43.2964	195.968	44.3704
rs7911226	G	A	G	A	-0.383991	-0.031	0.362273	0.31	FALSE	FALSE	FALSE	ukb-saige-153	10	90768965	0.023	387318	0.18	Colorectal cancer || id:ukb-saige-153	Colorectal cancer	Colorectal cancer || ||	TRUE	MedicineITLab	0.0344938	1732	7.53182e-28	FAS	TRUE	reported	finn-pQTL-R10-v1-FAS	2	TRUE	0.0681307	126.484	195.968	123.925
rs56342011	T	C	T	C	0.921361	0.019	0.0748664	0.088	FALSE	FALSE	FALSE	ukb-saige-153	5	127953592	0.038	387318	0.61	Colorectal cancer || id:ukb-saige-153	Colorectal cancer	Colorectal cancer || ||	TRUE	MedicineITLab	0.0605047	1732	3.09813e-49	FBN2	TRUE	reported	finn-pQTL-R10-v1-FBN2	2	TRUE	0.117593	230.546	195.968	231.89
rs1769259	T	C	T	C	0.537727	0.041	0.945417	0.93	FALSE	FALSE	FALSE	ukb-saige-153	9	97369149	0.041	387318	0.31	Colorectal cancer || id:ukb-saige-153	Colorectal cancer	Colorectal cancer || ||	TRUE	MedicineITLab	0.0750797	1732	1.17058e-12	FBP1	TRUE	reported	finn-pQTL-R10-v1-FBP1	2	TRUE	0.0298425	53.2155	195.968	51.2954
rs1340232	T	C	T	C	0.567985	-0.0028	0.203917	0.18	FALSE	FALSE	FALSE	ukb-saige-153	1	207143550	0.028	387318	0.92	Colorectal cancer || id:ukb-saige-153	Colorectal cancer	Colorectal cancer || ||	TRUE	MedicineITLab	0.0408343	1732	9.00326e-42	FCAMR	TRUE	reported	finn-pQTL-R10-v1-FCAMR	2	TRUE	0.104741	202.401	195.968	193.474
rs12459411	T	C	T	C	0.798207	-0.013	0.286709	0.22	FALSE	FALSE	FALSE	ukb-saige-153	19	55379225	0.026	387318	0.61	Colorectal cancer || id:ukb-saige-153	Colorectal cancer	Colorectal cancer || ||	TRUE	MedicineITLab	0.0330049	1732	1.48594e-111	FCAR	TRUE	reported	finn-pQTL-R10-v1-FCAR	2	TRUE	0.260597	609.725	195.968	584.89
rs73614672	G	A	G	A	-0.342605	0.035	0.0814122	0.067	FALSE	FALSE	FALSE	ukb-saige-153	19	55158865	0.043	387318	0.42	Colorectal cancer || id:ukb-saige-153	Colorectal cancer	Colorectal cancer || ||	TRUE	MedicineITLab	0.0622098	1732	4.19237e-08	FCAR	TRUE	reported	finn-pQTL-R10-v1-FCAR	2	TRUE	0.0175561	30.9148	195.968	30.3298
rs61828227	T	C	T	C	0.281036	-0.017	0.220716	0.17	FALSE	FALSE	FALSE	ukb-saige-153	1	159267618	0.029	387318	0.56	Colorectal cancer || id:ukb-saige-153	Colorectal cancer	Colorectal cancer || ||	TRUE	MedicineITLab	0.0400195	1732	3.12033e-12	FCER1A	TRUE	reported	finn-pQTL-R10-v1-FCER1A	2	TRUE	0.0271696	48.3162	195.968	49.3152
rs12973524	A	G	A	G	-0.310082	0.031	0.446368	0.48	FALSE	FALSE	FALSE	ukb-saige-153	19	7758263	0.021	387318	0.15	Colorectal cancer || id:ukb-saige-153	Colorectal cancer	Colorectal cancer || ||	TRUE	MedicineITLab	0.0333045	1732	3.72821e-20	FCER2	TRUE	reported	finn-pQTL-R10-v1-FCER2	2	TRUE	0.0475223	86.3155	195.968	86.6857
rs12980031	T	G	T	G	-0.256377	0.032	0.743238	0.76	FALSE	FALSE	FALSE	ukb-saige-153	19	7764436	0.026	387318	0.22	Colorectal cancer || id:ukb-saige-153	Colorectal cancer	Colorectal cancer || ||	TRUE	MedicineITLab	0.0396827	1732	1.35136e-10	FCER2	TRUE	reported	finn-pQTL-R10-v1-FCER2	2	TRUE	0.0250869	44.5171	195.968	41.7403
rs139932824	T	G	T	G	-1.0482	0.019	0.0294141	0.0088	FALSE	FALSE	FALSE	ukb-saige-153	1	162036151	0.12	387318	0.88	Colorectal cancer || id:ukb-saige-153	Colorectal cancer	Colorectal cancer || ||	TRUE	MedicineITLab	0.0992211	1732	2.5293e-25	FCGR2A	TRUE	reported	finn-pQTL-R10-v1-FCGR2A	2	TRUE	0.0627347	115.795	195.968	111.604
rs6699916	A	G	A	G	-0.26868	0.018	0.523217	0.49	FALSE	FALSE	FALSE	ukb-saige-153	1	161887336	0.021	387318	0.39	Colorectal cancer || id:ukb-saige-153	Colorectal cancer	Colorectal cancer || ||	TRUE	MedicineITLab	0.0332736	1732	1.25285e-15	FCGR2A	TRUE	reported	finn-pQTL-R10-v1-FCGR2A	2	TRUE	0.0360166	64.6368	195.968	65.2035
rs7549830	C	T	C	T	-0.437086	0.0026	0.140685	0.13	FALSE	FALSE	FALSE	ukb-saige-153	1	161688431	0.032	387318	0.93	Colorectal cancer || id:ukb-saige-153	Colorectal cancer	Colorectal cancer || ||	TRUE	MedicineITLab	0.0481095	1732	2.74979e-19	FCGR2A	TRUE	reported	finn-pQTL-R10-v1-FCGR2A	2	TRUE	0.0461917	83.7817	195.968	82.5415
rs9427398	G	A	G	A	-1.54973	0.022	0.101652	0.12	FALSE	FALSE	FALSE	ukb-saige-153	1	161476205	0.034	387318	0.52	Colorectal cancer || id:ukb-saige-153	Colorectal cancer	Colorectal cancer || ||	TRUE	MedicineITLab	0.0414236	1732	1e-200	FCGR2A	TRUE	reported	finn-pQTL-R10-v1-FCGR2A	2	TRUE	0.438634	1351.77	195.968	1399.64
rs1801274	G	A	G	A	0.394613	0.016	0.506405	0.53	FALSE	FALSE	FALSE	ukb-saige-153	1	161479745	0.021	387318	0.45	Colorectal cancer || id:ukb-saige-153	Colorectal cancer	Colorectal cancer || ||	TRUE	MedicineITLab	0.0330877	1732	1.43681e-31	FCGR2B	TRUE	reported	finn-pQTL-R10-v1-FCGR2B	2	TRUE	0.0778469	146.044	195.968	142.236
rs6686673	C	T	C	T	0.363371	-0.039	0.219341	0.27	FALSE	FALSE	FALSE	ukb-saige-153	1	161654948	0.024	387318	0.1	Colorectal cancer || id:ukb-saige-153	Colorectal cancer	Colorectal cancer || ||	TRUE	MedicineITLab	0.0400607	1732	3.12896e-19	FCGR2B	TRUE	reported	finn-pQTL-R10-v1-FCGR2B	2	TRUE	0.045218	81.932	195.968	82.2742
rs111847432	A	G	A	G	-0.369472	-0.079	0.111338	0.12	FALSE	FALSE	FALSE	ukb-saige-153	1	161027764	0.033	387318	0.018	Colorectal cancer || id:ukb-saige-153	Colorectal cancer	Colorectal cancer || ||	TRUE	MedicineITLab	0.053321	1732	5.94977e-12	FCGR3B	TRUE	reported	finn-pQTL-R10-v1-FCGR3B	2	TRUE	0.027013	48.03	195.968	48.0138
rs1629019	T	C	T	C	-0.711578	0.0065	0.362277	0.34	FALSE	FALSE	FALSE	ukb-saige-153	1	161607391	0.023	387318	0.78	Colorectal cancer || id:ukb-saige-153	Colorectal cancer	Colorectal cancer || ||	TRUE	MedicineITLab	0.0316184	1732	1.3807e-98	FCGR3B	TRUE	reported	finn-pQTL-R10-v1-FCGR3B	2	TRUE	0.233963	528.378	195.968	506.483
rs4657041	C	T	C	T	0.213952	0.017	0.508308	0.53	FALSE	FALSE	FALSE	ukb-saige-153	1	161478859	0.021	387318	0.44	Colorectal cancer || id:ukb-saige-153	Colorectal cancer	Colorectal cancer || ||	TRUE	MedicineITLab	0.0340132	1732	4.00488e-10	FCGR3B	TRUE	reported	finn-pQTL-R10-v1-FCGR3B	2	TRUE	0.0228814	40.5118	195.968	39.5674
rs10858304	C	T	C	T	0.443684	0.041	0.352223	0.26	FALSE	FALSE	FALSE	ukb-saige-153	9	137857863	0.024	387318	0.095	Colorectal cancer || id:ukb-saige-153	Colorectal cancer	Colorectal cancer || ||	TRUE	MedicineITLab	0.0342264	1732	9.58738e-37	FCN1	TRUE	reported	finn-pQTL-R10-v1-FCN1	2	TRUE	0.0898299	170.744	195.968	168.045
rs11103557	A	C	A	C	0.461123	-0.035	0.055425	0.076	FALSE	FALSE	FALSE	ukb-saige-153	9	137756821	0.04	387318	0.38	Colorectal cancer || id:ukb-saige-153	Colorectal cancer	Colorectal cancer || ||	TRUE	MedicineITLab	0.0728872	1732	3.18544e-10	FCN2	TRUE	reported	finn-pQTL-R10-v1-FCN2	2	TRUE	0.0222641	39.394	195.968	40.025
rs11794851	A	G	A	G	-0.341992	-0.036	0.140355	0.11	FALSE	FALSE	FALSE	ukb-saige-153	9	138030047	0.035	387318	0.29	Colorectal cancer || id:ukb-saige-153	Colorectal cancer	Colorectal cancer || ||	TRUE	MedicineITLab	0.0493106	1732	5.69902e-12	FCN2	TRUE	reported	finn-pQTL-R10-v1-FCN2	2	TRUE	0.0282234	50.2445	195.968	48.1007
rs57136797	T	A	T	A	-0.907611	0.024	0.193339	0.15	FALSE	TRUE	FALSE	ukb-saige-153	9	137752540	0.031	387318	0.45	Colorectal cancer || id:ukb-saige-153	Colorectal cancer	Colorectal cancer || ||	TRUE	MedicineITLab	0.0373383	1732	1.58855e-112	FCN2	TRUE	reported	finn-pQTL-R10-v1-FCN2	2	TRUE	0.256945	598.226	195.968	590.868
rs2050568	T	C	T	C	0.408598	-0.029	0.413596	0.47	FALSE	FALSE	FALSE	ukb-saige-153	1	157770241	0.021	387318	0.17	Colorectal cancer || id:ukb-saige-153	Colorectal cancer	Colorectal cancer || ||	TRUE	MedicineITLab	0.0337047	1732	1.59772e-32	FCRL1	TRUE	reported	finn-pQTL-R10-v1-FCRL1	2	TRUE	0.0809833	152.447	195.968	146.964
rs7543979	C	A	C	A	0.80522	0.0053	0.141548	0.17	FALSE	FALSE	FALSE	ukb-saige-153	1	157741318	0.029	387318	0.85	Colorectal cancer || id:ukb-saige-153	Colorectal cancer	Colorectal cancer || ||	TRUE	MedicineITLab	0.0450026	1732	7.94328e-66	FCRL2	TRUE	reported	finn-pQTL-R10-v1-FCRL2	2	TRUE	0.157572	323.588	195.968	320.15
rs77368867	A	G	A	G	-0.7709	-0.062	0.028814	0.029	FALSE	FALSE	FALSE	ukb-saige-153	1	157893458	0.065	387318	0.33	Colorectal cancer || id:ukb-saige-153	Colorectal cancer	Colorectal cancer || ||	TRUE	MedicineITLab	0.101434	1732	4.82281e-14	FCRL2	TRUE	reported	finn-pQTL-R10-v1-FCRL2	2	TRUE	0.0332608	59.5208	195.968	57.7602
rs2210912	C	A	C	A	0.981008	-0.028	0.428085	0.48	FALSE	FALSE	FALSE	ukb-saige-153	1	157668701	0.021	387318	0.19	Colorectal cancer || id:ukb-saige-153	Colorectal cancer	Colorectal cancer || ||	TRUE	MedicineITLab	0.0250056	1732	1e-200	FCRL3	TRUE	reported	finn-pQTL-R10-v1-FCRL3	2	TRUE	0.471234	1541.77	195.968	1539.11
rs67933558	G	T	G	T	0.360563	0.036	0.077708	0.06	FALSE	FALSE	FALSE	ukb-saige-153	1	157975201	0.046	387318	0.43	Colorectal cancer || id:ukb-saige-153	Colorectal cancer	Colorectal cancer || ||	TRUE	MedicineITLab	0.0642953	1732	2.37947e-08	FCRL3	TRUE	reported	finn-pQTL-R10-v1-FCRL3	2	TRUE	0.0186349	32.8505	195.968	31.4488
rs12083967	C	T	C	T	-0.952512	-0.033	0.141898	0.18	FALSE	FALSE	FALSE	ukb-saige-153	1	159778983	0.028	387318	0.23	Colorectal cancer || id:ukb-saige-153	Colorectal cancer	Colorectal cancer || ||	TRUE	MedicineITLab	0.0435315	1732	6.79986e-94	FCRL6	TRUE	reported	finn-pQTL-R10-v1-FCRL6	2	TRUE	0.220946	490.642	195.968	478.777
rs4133290	C	T	C	T	-0.213565	-0.028	0.423062	0.42	FALSE	FALSE	FALSE	ukb-saige-153	1	159819491	0.022	387318	0.21	Colorectal cancer || id:ukb-saige-153	Colorectal cancer	Colorectal cancer || ||	TRUE	MedicineITLab	0.0340014	1732	4.24326e-10	FCRL6	TRUE	reported	finn-pQTL-R10-v1-FCRL6	2	TRUE	0.022265	39.3957	195.968	39.4518
rs12121318	A	G	A	G	-0.413169	-0.058	0.109094	0.041	FALSE	FALSE	FALSE	ukb-saige-153	1	161492268	0.056	387318	0.3	Colorectal cancer || id:ukb-saige-153	Colorectal cancer	Colorectal cancer || ||	TRUE	MedicineITLab	0.0542469	1732	4.26481e-14	FCRLB	TRUE	reported	finn-pQTL-R10-v1-FCRLB	2	TRUE	0.0331832	59.3773	195.968	58.0104
rs141762637	T	G	T	G	-1.01181	-0.02	0.0188732	0.022	FALSE	FALSE	FALSE	ukb-saige-153	1	161578106	0.077	387318	0.8	Colorectal cancer || id:ukb-saige-153	Colorectal cancer	Colorectal cancer || ||	TRUE	MedicineITLab	0.127685	1732	4.07568e-15	FCRLB	TRUE	reported	finn-pQTL-R10-v1-FCRLB	2	TRUE	0.0379139	68.1759	195.968	62.794
rs150815370	A	G	A	G	1.01165	-0.095	0.0282854	0.0094	FALSE	FALSE	FALSE	ukb-saige-153	1	162135204	0.12	387318	0.42	Colorectal cancer || id:ukb-saige-153	Colorectal cancer	Colorectal cancer || ||	TRUE	MedicineITLab	0.100541	1732	3.48017e-23	FCRLB	TRUE	reported	finn-pQTL-R10-v1-FCRLB	2	TRUE	0.0562589	103.13	195.968	101.245
rs35137451	G	A	G	A	0.433617	0.0014	0.0561133	0.032	FALSE	FALSE	FALSE	ukb-saige-153	1	161722530	0.061	387318	0.98	Colorectal cancer || id:ukb-saige-153	Colorectal cancer	Colorectal cancer || ||	TRUE	MedicineITLab	0.0726707	1732	2.92678e-09	FCRLB	TRUE	reported	finn-pQTL-R10-v1-FCRLB	2	TRUE	0.0199172	35.157	195.968	35.6036
rs61801180	C	G	C	G	1.31896	0.0086	0.0569579	0.061	FALSE	TRUE	FALSE	ukb-saige-153	1	161688764	0.044	387318	0.85	Colorectal cancer || id:ukb-saige-153	Colorectal cancer	Colorectal cancer || ||	TRUE	MedicineITLab	0.0639462	1732	1.08693e-84	FCRLB	TRUE	reported	finn-pQTL-R10-v1-FCRLB	2	TRUE	0.186887	397.625	195.968	425.436
rs5030103	C	T	C	T	-1.74955	0.057	0.00517706	0.011	FALSE	FALSE	FALSE	ukb-saige-153	3	186448928	0.1	387318	0.57	Colorectal cancer || id:ukb-saige-153	Colorectal cancer	Colorectal cancer || ||	TRUE	MedicineITLab	0.237015	1732	2.41824e-13	FETUB	TRUE	reported	finn-pQTL-R10-v1-FETUB	2	TRUE	0.0315291	56.3211	195.968	54.488
rs308403	T	C	T	C	-0.330335	0.0084	0.233341	0.31	FALSE	FALSE	FALSE	ukb-saige-153	4	123757748	0.023	387318	0.72	Colorectal cancer || id:ukb-saige-153	Colorectal cancer	Colorectal cancer || ||	TRUE	MedicineITLab	0.039609	1732	1.4983e-16	FGF2	TRUE	reported	finn-pQTL-R10-v1-FGF2	2	TRUE	0.039042	70.2869	195.968	69.5539
rs12509595	C	T	C	T	0.769718	0.02	0.304827	0.29	FALSE	FALSE	FALSE	ukb-saige-153	4	81182554	0.024	387318	0.39	Colorectal cancer || id:ukb-saige-153	Colorectal cancer	Colorectal cancer || ||	TRUE	MedicineITLab	0.032496	1732	1.16681e-107	FGF5	TRUE	reported	finn-pQTL-R10-v1-FGF5	2	TRUE	0.251096	580.042	195.968	561.052
rs35700679	G	A	G	A	0.706036	-0.055	0.165916	0.15	FALSE	FALSE	FALSE	ukb-saige-153	4	15960246	0.03	387318	0.066	Colorectal cancer || id:ukb-saige-153	Colorectal cancer	Colorectal cancer || ||	TRUE	MedicineITLab	0.0417064	1732	1.32526e-59	FGFBP2	TRUE	reported	finn-pQTL-R10-v1-FGFBP2	2	TRUE	0.137969	276.889	195.968	286.582
rs58447609	T	A	T	A	0.29372	-0.017	0.185797	0.22	FALSE	TRUE	FALSE	ukb-saige-153	4	16412190	0.026	387318	0.51	Colorectal cancer || id:ukb-saige-153	Colorectal cancer	Colorectal cancer || ||	TRUE	MedicineITLab	0.0429196	1732	1.06905e-11	FGFBP2	TRUE	reported	finn-pQTL-R10-v1-FGFBP2	2	TRUE	0.0261017	46.3661	195.968	46.8334
rs11186737	T	C	T	C	-0.57333	-0.0015	0.263598	0.31	FALSE	FALSE	FALSE	ukb-saige-153	10	93666349	0.023	387318	0.95	Colorectal cancer || id:ukb-saige-153	Colorectal cancer	Colorectal cancer || ||	TRUE	MedicineITLab	0.0360023	1732	2.18827e-53	FGFBP3	TRUE	reported	finn-pQTL-R10-v1-FGFBP3	2	TRUE	0.127613	253.066	195.968	253.6
rs351855	A	G	A	G	1.01557	-0.019	0.335562	0.3	FALSE	FALSE	FALSE	ukb-saige-153	5	176520243	0.023	387318	0.41	Colorectal cancer || id:ukb-saige-153	Colorectal cancer	Colorectal cancer || ||	TRUE	MedicineITLab	0.0265461	1732	1e-200	FGFR4	TRUE	reported	finn-pQTL-R10-v1-FGFR4	2	TRUE	0.459914	1473.2	195.968	1463.59
rs489077	C	T	C	T	0.508121	-0.041	0.0411822	0.039	FALSE	FALSE	FALSE	ukb-saige-153	5	176207213	0.056	387318	0.47	Colorectal cancer || id:ukb-saige-153	Colorectal cancer	Colorectal cancer || ||	TRUE	MedicineITLab	0.0866645	1732	5.43038e-09	FGFR4	TRUE	reported	finn-pQTL-R10-v1-FGFR4	2	TRUE	0.0203897	36.0083	195.968	34.3757
rs7701834	T	C	T	C	0.242436	0.0038	0.558423	0.53	FALSE	FALSE	FALSE	ukb-saige-153	5	176153641	0.021	387318	0.86	Colorectal cancer || id:ukb-saige-153	Colorectal cancer	Colorectal cancer || ||	TRUE	MedicineITLab	0.0333579	1732	5.50935e-13	FGFR4	TRUE	reported	finn-pQTL-R10-v1-FGFR4	2	TRUE	0.0289864	51.6434	195.968	52.8198
rs10094922	C	T	C	T	0.741984	0.0085	0.614521	0.63	FALSE	FALSE	FALSE	ukb-saige-153	8	17750200	0.022	387318	0.7	Colorectal cancer || id:ukb-saige-153	Colorectal cancer	Colorectal cancer || ||	TRUE	MedicineITLab	0.0303598	1732	1.44544e-113	FGL1	TRUE	reported	finn-pQTL-R10-v1-FGL1	2	TRUE	0.260829	610.461	195.968	597.298
rs10103304	C	T	C	T	-1.21238	0.023	0.00987298	0.015	FALSE	FALSE	FALSE	ukb-saige-153	8	17993293	0.09	387318	0.8	Colorectal cancer || id:ukb-saige-153	Colorectal cancer	Colorectal cancer || ||	TRUE	MedicineITLab	0.170699	1732	1.78361e-12	FGL1	TRUE	reported	finn-pQTL-R10-v1-FGL1	2	TRUE	0.0287373	51.1866	195.968	50.4447
rs188626575	A	C	A	C	-0.8372	0.028	0.0157825	0.0018	FALSE	FALSE	FALSE	ukb-saige-153	8	18214589	0.26	387318	0.91	Colorectal cancer || id:ukb-saige-153	Colorectal cancer	Colorectal cancer || ||	TRUE	MedicineITLab	0.136352	1732	1.02132e-09	FGL1	TRUE	reported	finn-pQTL-R10-v1-FGL1	2	TRUE	0.0217749	38.509	195.968	37.6995
rs6997385	G	A	G	A	0.653634	0.2	0.956703	0.99	FALSE	FALSE	FALSE	ukb-saige-153	8	18536310	0.093	387318	0.028	Colorectal cancer || id:ukb-saige-153	Colorectal cancer	Colorectal cancer || ||	TRUE	MedicineITLab	0.0815692	1732	2.03517e-15	FGL1	TRUE	reported	finn-pQTL-R10-v1-FGL1	2	TRUE	0.0353944	63.4791	195.968	64.2121
rs7014436	C	A	C	A	-0.65297	0.015	0.0692105	0.092	FALSE	FALSE	FALSE	ukb-saige-153	8	17511353	0.037	387318	0.68	Colorectal cancer || id:ukb-saige-153	Colorectal cancer	Colorectal cancer || ||	TRUE	MedicineITLab	0.0650442	1732	4.3461e-23	FGL1	TRUE	reported	finn-pQTL-R10-v1-FGL1	2	TRUE	0.0549338	100.56	195.968	100.779
rs2817031	C	T	C	T	0.234971	-0.027	0.279483	0.29	FALSE	FALSE	FALSE	ukb-saige-153	6	35685193	0.024	387318	0.26	Colorectal cancer || id:ukb-saige-153	Colorectal cancer	Colorectal cancer || ||	TRUE	MedicineITLab	0.037971	1732	7.58228e-10	FKBP5	TRUE	reported	finn-pQTL-R10-v1-FKBP5	2	TRUE	0.0222361	39.3433	195.968	38.2934
rs113894014	T	C	T	C	-0.716869	-0.094	0.043538	0.016	FALSE	FALSE	FALSE	ukb-saige-153	14	85807826	0.088	387318	0.29	Colorectal cancer || id:ukb-saige-153	Colorectal cancer	Colorectal cancer || ||	TRUE	MedicineITLab	0.0817211	1732	4.11244e-18	FLRT2	TRUE	reported	finn-pQTL-R10-v1-FLRT2	2	TRUE	0.0428002	77.3552	195.968	76.9505
rs2753615	T	G	T	G	1.00476	0.02	0.821569	0.85	FALSE	FALSE	FALSE	ukb-saige-153	14	86075957	0.03	387318	0.51	Colorectal cancer || id:ukb-saige-153	Colorectal cancer	Colorectal cancer || ||	TRUE	MedicineITLab	0.0368797	1732	2.68534e-136	FLRT2	TRUE	reported	finn-pQTL-R10-v1-FLRT2	2	TRUE	0.295985	727.332	195.968	742.25
rs74072222	T	C	T	C	-0.267905	-0.013	0.160815	0.16	FALSE	FALSE	FALSE	ukb-saige-153	14	86996866	0.03	387318	0.66	Colorectal cancer || id:ukb-saige-153	Colorectal cancer	Colorectal cancer || ||	TRUE	MedicineITLab	0.0458019	1732	5.89305e-09	FLRT2	TRUE	reported	finn-pQTL-R10-v1-FLRT2	2	TRUE	0.0193721	34.1757	195.968	34.2133
rs77349443	G	A	G	A	0.391162	-0.00072	0.120484	0.12	FALSE	FALSE	FALSE	ukb-saige-153	14	85609442	0.033	387318	0.98	Colorectal cancer || id:ukb-saige-153	Colorectal cancer	Colorectal cancer || ||	TRUE	MedicineITLab	0.0510197	1732	2.92012e-14	FLRT2	TRUE	reported	finn-pQTL-R10-v1-FLRT2	2	TRUE	0.0324277	57.9801	195.968	58.7811
rs147594817	G	A	G	A	-1.26822	0.097	0.0244736	0.022	FALSE	FALSE	FALSE	ukb-saige-153	13	28923763	0.077	387318	0.21	Colorectal cancer || id:ukb-saige-153	Colorectal cancer	Colorectal cancer || ||	TRUE	MedicineITLab	0.108732	1732	2.57632e-30	FLT1	TRUE	reported	finn-pQTL-R10-v1-FLT1	2	TRUE	0.0767991	143.915	195.968	136.042
rs34221241	C	T	C	T	-0.423791	-0.066	0.129258	0.11	FALSE	FALSE	FALSE	ukb-saige-153	5	180057293	0.035	387318	0.057	Colorectal cancer || id:ukb-saige-153	Colorectal cancer	Colorectal cancer || ||	TRUE	MedicineITLab	0.0503937	1732	8.48203e-17	FLT4	TRUE	reported	finn-pQTL-R10-v1-FLT4	2	TRUE	0.0404278	72.8868	195.968	70.7214
rs1250247	G	C	G	C	0.2357	0.0055	0.792125	0.73	FALSE	TRUE	FALSE	ukb-saige-153	2	216299629	0.024	387318	0.82	Colorectal cancer || id:ukb-saige-153	Colorectal cancer	Colorectal cancer || ||	TRUE	MedicineITLab	0.041297	1732	1.34682e-08	FN1	TRUE	reported	finn-pQTL-R10-v1-FN1	2	TRUE	0.0182955	32.2411	195.968	32.5748
rs4944458	G	A	G	A	0.223173	-0.011	0.753795	0.77	FALSE	FALSE	FALSE	ukb-saige-153	11	72088912	0.026	387318	0.68	Colorectal cancer || id:ukb-saige-153	Colorectal cancer	Colorectal cancer || ||	TRUE	MedicineITLab	0.0394902	1732	1.8581e-08	FOLR3	TRUE	reported	finn-pQTL-R10-v1-FOLR3	2	TRUE	0.0184869	32.5847	195.968	31.9378
rs74551484	T	C	T	C	0.649035	-0.0099	0.0366843	0.04	FALSE	FALSE	FALSE	ukb-saige-153	11	71012160	0.054	387318	0.85	Colorectal cancer || id:ukb-saige-153	Colorectal cancer	Colorectal cancer || ||	TRUE	MedicineITLab	0.090033	1732	8.3946e-13	FOLR3	TRUE	reported	finn-pQTL-R10-v1-FOLR3	2	TRUE	0.0297725	53.0869	195.968	51.9676
rs75313463	C	A	C	A	1.33122	0.097	0.124002	0.092	FALSE	FALSE	FALSE	ukb-saige-153	11	71867841	0.037	387318	0.0092	Colorectal cancer || id:ukb-saige-153	Colorectal cancer	Colorectal cancer || ||	TRUE	MedicineITLab	0.0390314	1732	1.95884e-195	FOLR3	TRUE	reported	finn-pQTL-R10-v1-FOLR3	2	TRUE	0.385001	1083.01	195.968	1163.25
rs12611837	G	A	G	A	-0.213671	-0.01	0.525282	0.52	FALSE	FALSE	FALSE	ukb-saige-153	2	183704084	0.021	387318	0.63	Colorectal cancer || id:ukb-saige-153	Colorectal cancer	Colorectal cancer || ||	TRUE	MedicineITLab	0.0338003	1732	3.28693e-10	FRZB	TRUE	reported	finn-pQTL-R10-v1-FRZB	2	TRUE	0.0227693	40.3087	195.968	39.9623
rs4666606	A	G	A	G	0.26187	-0.016	0.669154	0.61	FALSE	FALSE	FALSE	ukb-saige-153	2	183929256	0.022	387318	0.48	Colorectal cancer || id:ukb-saige-153	Colorectal cancer	Colorectal cancer || ||	TRUE	MedicineITLab	0.0355681	1732	2.77843e-13	FRZB	TRUE	reported	finn-pQTL-R10-v1-FRZB	2	TRUE	0.0303636	54.174	195.968	54.2063
rs255751	T	C	T	C	-0.218833	0.0099	0.650402	0.7	FALSE	FALSE	FALSE	ukb-saige-153	5	53319517	0.023	387318	0.67	Colorectal cancer || id:ukb-saige-153	Colorectal cancer	Colorectal cancer || ||	TRUE	MedicineITLab	0.0361023	1732	1.65208e-09	FST	TRUE	reported	finn-pQTL-R10-v1-FST	2	TRUE	0.0217774	38.5137	195.968	36.7414
rs12755062	A	T	A	T	-0.383224	-0.013	0.388246	0.34	FALSE	TRUE	FALSE	ukb-saige-153	1	24185025	0.022	387318	0.57	Colorectal cancer || id:ukb-saige-153	Colorectal cancer	Colorectal cancer || ||	TRUE	MedicineITLab	0.03276	1732	1.77501e-30	FUCA1	TRUE	reported	finn-pQTL-R10-v1-FUCA1	2	TRUE	0.069762	129.739	195.968	136.841
rs2127870	C	G	C	G	-0.567359	0.02	0.825346	0.79	FALSE	TRUE	FALSE	ukb-saige-153	14	65796846	0.026	387318	0.45	Colorectal cancer || id:ukb-saige-153	Colorectal cancer	Colorectal cancer || ||	TRUE	MedicineITLab	0.0430934	1732	8.49767e-38	FUT8	TRUE	reported	finn-pQTL-R10-v1-FUT8	2	TRUE	0.0928027	176.972	195.968	173.338
rs58708909	G	A	G	A	-0.431538	0.02	0.144342	0.086	FALSE	FALSE	FALSE	ukb-saige-153	14	65649265	0.039	387318	0.6	Colorectal cancer || id:ukb-saige-153	Colorectal cancer	Colorectal cancer || ||	TRUE	MedicineITLab	0.0477066	1732	3.88866e-19	FUT8	TRUE	reported	finn-pQTL-R10-v1-FUT8	2	TRUE	0.0460003	83.4178	195.968	81.8241
rs10425064	C	A	C	A	-0.325106	0.029	0.765169	0.81	FALSE	FALSE	FALSE	ukb-saige-153	19	35685773	0.027	387318	0.29	Colorectal cancer || id:ukb-saige-153	Colorectal cancer	Colorectal cancer || ||	TRUE	MedicineITLab	0.0389289	1732	1.36584e-16	FXYD5	TRUE	reported	finn-pQTL-R10-v1-FXYD5	2	TRUE	0.0379833	68.3056	195.968	69.7438
rs890793	T	C	T	C	0.462493	-0.00096	0.354362	0.38	FALSE	FALSE	FALSE	ukb-saige-153	5	153573938	0.022	387318	0.96	Colorectal cancer || id:ukb-saige-153	Colorectal cancer	Colorectal cancer || ||	TRUE	MedicineITLab	0.0337255	1732	1.0452e-40	GALNT10	TRUE	reported	finn-pQTL-R10-v1-GALNT10	2	TRUE	0.0978761	187.697	195.968	188.059
rs4846923	G	T	G	T	0.388096	0.012	0.660136	0.7	FALSE	FALSE	FALSE	ukb-saige-153	1	230307222	0.024	387318	0.6	Colorectal cancer || id:ukb-saige-153	Colorectal cancer	Colorectal cancer || ||	TRUE	MedicineITLab	0.0349873	1732	1.14104e-27	GALNT2	TRUE	reported	finn-pQTL-R10-v1-GALNT2	2	TRUE	0.0675845	125.396	195.968	123.043
rs12692783	C	T	C	T	-0.394658	-0.025	0.31477	0.33	FALSE	FALSE	FALSE	ukb-saige-153	2	166718377	0.023	387318	0.27	Colorectal cancer || id:ukb-saige-153	Colorectal cancer	Colorectal cancer || ||	TRUE	MedicineITLab	0.0349918	1732	1.6125e-28	GALNT3	TRUE	reported	finn-pQTL-R10-v1-GALNT3	2	TRUE	0.0671895	124.61	195.968	127.206
rs11904136	T	C	T	C	-1.49964	-0.054	0.00842389	0.018	FALSE	FALSE	FALSE	ukb-saige-153	2	158124277	0.08	387318	0.5	Colorectal cancer || id:ukb-saige-153	Colorectal cancer	Colorectal cancer || ||	TRUE	MedicineITLab	0.183921	1732	6.70348e-16	GALNT5	TRUE	reported	finn-pQTL-R10-v1-GALNT5	2	TRUE	0.0375701	67.5336	195.968	66.4831
rs60851779	T	G	T	G	0.699418	0.032	0.0936048	0.014	FALSE	FALSE	FALSE	ukb-saige-153	2	158117754	0.089	387318	0.72	Colorectal cancer || id:ukb-saige-153	Colorectal cancer	Colorectal cancer || ||	TRUE	MedicineITLab	0.0549127	1732	1.38452e-35	GALNT5	TRUE	reported	finn-pQTL-R10-v1-GALNT5	2	TRUE	0.0830079	156.603	195.968	162.229
rs62175178	C	T	C	T	-0.637442	-0.041	0.0381877	0.027	FALSE	FALSE	FALSE	ukb-saige-153	2	158046256	0.068	387318	0.55	Colorectal cancer || id:ukb-saige-153	Colorectal cancer	Colorectal cancer || ||	TRUE	MedicineITLab	0.0878664	1732	6.05062e-13	GALNT5	TRUE	reported	finn-pQTL-R10-v1-GALNT5	2	TRUE	0.0298487	53.227	195.968	52.6303
rs6602909	C	T	C	T	-0.378716	0.017	0.347856	0.33	FALSE	FALSE	FALSE	ukb-saige-153	13	114551993	0.023	387318	0.45	Colorectal cancer || id:ukb-saige-153	Colorectal cancer	Colorectal cancer || ||	TRUE	MedicineITLab	0.0339806	1732	6.58264e-28	GAS6	TRUE	reported	finn-pQTL-R10-v1-GAS6	2	TRUE	0.0650729	120.412	195.968	124.212
rs2372070	C	T	C	T	-0.202796	0.0026	0.60761	0.55	FALSE	FALSE	FALSE	ukb-saige-153	3	42718129	0.022	387318	0.9	Colorectal cancer || id:ukb-saige-153	Colorectal cancer	Colorectal cancer || ||	TRUE	MedicineITLab	0.0347416	1732	6.32281e-09	GASK1A	TRUE	reported	finn-pQTL-R10-v1-GASK1A	2	TRUE	0.0196106	34.605	195.968	34.0737
rs55819365	A	G	A	G	-0.443528	0.07	0.199111	0.2	FALSE	FALSE	FALSE	ukb-saige-153	3	43154660	0.027	387318	0.0089	Colorectal cancer || id:ukb-saige-153	Colorectal cancer	Colorectal cancer || ||	TRUE	MedicineITLab	0.0423417	1732	6.16453e-25	GASK1A	TRUE	reported	finn-pQTL-R10-v1-GASK1A	2	TRUE	0.0627393	115.804	195.968	109.725
rs62247124	C	T	C	T	-0.9597	0.021	0.175272	0.17	FALSE	FALSE	FALSE	ukb-saige-153	3	43080950	0.029	387318	0.47	Colorectal cancer || id:ukb-saige-153	Colorectal cancer	Colorectal cancer || ||	TRUE	MedicineITLab	0.0388731	1732	1.55955e-115	GASK1A	TRUE	reported	finn-pQTL-R10-v1-GASK1A	2	TRUE	0.266271	627.82	195.968	609.498
rs148526074	T	G	T	G	-1.37538	0.043	0.030751	0.028	FALSE	FALSE	FALSE	ukb-saige-153	1	89523756	0.066	387318	0.51	Colorectal cancer || id:ukb-saige-153	Colorectal cancer	Colorectal cancer || ||	TRUE	MedicineITLab	0.0924931	1732	3.69913e-47	GBP1	TRUE	reported	finn-pQTL-R10-v1-GBP1	2	TRUE	0.112764	219.876	195.968	221.119
rs4233337	T	C	T	C	-0.474269	-0.0053	0.55221	0.49	FALSE	FALSE	FALSE	ukb-saige-153	1	89636947	0.021	387318	0.81	Colorectal cancer || id:ukb-saige-153	Colorectal cancer	Colorectal cancer || ||	TRUE	MedicineITLab	0.0320293	1732	8.47618e-47	GBP4	TRUE	reported	finn-pQTL-R10-v1-GBP4	2	TRUE	0.111239	216.531	195.968	219.258
rs114642415	T	C	T	C	0.829606	0.0092	0.0217804	0.013	FALSE	FALSE	FALSE	ukb-saige-153	4	71700629	0.093	387318	0.92	Colorectal cancer || id:ukb-saige-153	Colorectal cancer	Colorectal cancer || ||	TRUE	MedicineITLab	0.118326	1732	3.37598e-12	GC	TRUE	reported	finn-pQTL-R10-v1-GC	2	TRUE	0.0293276	52.2696	195.968	49.1568
rs1352846	G	A	G	A	1.27299	0.048	0.211432	0.29	FALSE	FALSE	FALSE	ukb-saige-153	4	72617775	0.024	387318	0.039	Colorectal cancer || id:ukb-saige-153	Colorectal cancer	Colorectal cancer || ||	TRUE	MedicineITLab	0.0258433	1732	1e-200	GC	TRUE	reported	finn-pQTL-R10-v1-GC	2	TRUE	0.540368	2033.88	195.968	2426.35
rs36102036	A	G	A	G	-0.337099	0.022	0.33135	0.35	FALSE	FALSE	FALSE	ukb-saige-153	4	72912236	0.022	387318	0.33	Colorectal cancer || id:ukb-saige-153	Colorectal cancer	Colorectal cancer || ||	TRUE	MedicineITLab	0.0362387	1732	4.01791e-20	GC	TRUE	reported	finn-pQTL-R10-v1-GC	2	TRUE	0.0503536	91.7307	195.968	86.5306
rs74801295	C	G	C	G	0.991589	0.072	0.0119075	0.011	FALSE	TRUE	FALSE	ukb-saige-153	4	71722408	0.11	387318	0.52	Colorectal cancer || id:ukb-saige-153	Colorectal cancer	Colorectal cancer || ||	TRUE	MedicineITLab	0.168522	1732	4.79744e-09	GC	TRUE	reported	finn-pQTL-R10-v1-GC	2	TRUE	0.0231372	40.9755	195.968	34.6218
rs11144931	G	A	G	A	-0.444789	-0.019	0.163898	0.21	FALSE	FALSE	FALSE	ukb-saige-153	9	79121380	0.026	387318	0.47	Colorectal cancer || id:ukb-saige-153	Colorectal cancer	Colorectal cancer || ||	TRUE	MedicineITLab	0.0442367	1732	3.7325e-23	GCNT1	TRUE	reported	finn-pQTL-R10-v1-GCNT1	2	TRUE	0.0542214	99.1808	195.968	101.098
rs139792215	T	C	T	C	-0.475384	-0.045	0.0665682	0.092	FALSE	FALSE	FALSE	ukb-saige-153	5	37798854	0.037	387318	0.23	Colorectal cancer || id:ukb-saige-153	Colorectal cancer	Colorectal cancer || ||	TRUE	MedicineITLab	0.0666073	1732	1.39669e-12	GDNF	TRUE	reported	finn-pQTL-R10-v1-GDNF	2	TRUE	0.0280846	49.9903	195.968	50.9384
rs11197603	C	T	C	T	-0.473197	-0.0084	0.17973	0.15	FALSE	FALSE	FALSE	ukb-saige-153	10	118001771	0.03	387318	0.78	Colorectal cancer || id:ukb-saige-153	Colorectal cancer	Colorectal cancer || ||	TRUE	MedicineITLab	0.0415128	1732	4.48849e-29	GFRA1	TRUE	reported	finn-pQTL-R10-v1-GFRA1	2	TRUE	0.0660224	122.293	195.968	129.933
rs2694756	A	G	A	G	0.195429	0.0084	0.468197	0.52	FALSE	FALSE	FALSE	ukb-saige-153	10	117958551	0.023	387318	0.71	Colorectal cancer || id:ukb-saige-153	Colorectal cancer	Colorectal cancer || ||	TRUE	MedicineITLab	0.0353624	1732	3.76574e-08	GFRA1	TRUE	reported	finn-pQTL-R10-v1-GFRA1	2	TRUE	0.019019	33.5408	195.968	30.5418
rs17060577	G	A	G	A	-0.274956	0.065	0.203978	0.16	FALSE	FALSE	FALSE	ukb-saige-153	8	21673762	0.029	387318	0.025	Colorectal cancer || id:ukb-saige-153	Colorectal cancer	Colorectal cancer || ||	TRUE	MedicineITLab	0.0408902	1732	2.39001e-11	GFRA2	TRUE	reported	finn-pQTL-R10-v1-GFRA2	2	TRUE	0.0245508	43.5418	195.968	45.2156
rs1871743	G	A	G	A	0.386032	0.011	0.541168	0.57	FALSE	FALSE	FALSE	ukb-saige-153	8	21477345	0.022	387318	0.61	Colorectal cancer || id:ukb-saige-153	Colorectal cancer	Colorectal cancer || ||	TRUE	MedicineITLab	0.0324865	1732	2.32541e-31	GFRA2	TRUE	reported	finn-pQTL-R10-v1-GFRA2	2	TRUE	0.0740052	138.261	195.968	141.202
rs1964043	C	G	C	G	-0.272892	0.029	0.64929	0.69	FALSE	TRUE	FALSE	ukb-saige-153	6	55281487	0.023	387318	0.2	Colorectal cancer || id:ukb-saige-153	Colorectal cancer	Colorectal cancer || ||	TRUE	MedicineITLab	0.0342712	1732	3.02134e-15	GFRAL	TRUE	reported	finn-pQTL-R10-v1-GFRAL	2	TRUE	0.0339155	60.7337	195.968	63.4049
rs72988065	G	A	G	A	0.440208	-0.05	0.198271	0.16	FALSE	FALSE	FALSE	ukb-saige-153	6	55484581	0.029	387318	0.087	Colorectal cancer || id:ukb-saige-153	Colorectal cancer	Colorectal cancer || ||	TRUE	MedicineITLab	0.0413954	1732	1.25314e-25	GFRAL	TRUE	reported	finn-pQTL-R10-v1-GFRAL	2	TRUE	0.0616074	113.578	195.968	113.087
rs35319502	T	C	T	C	1.27396	0.17	0.028591	0.0061	FALSE	FALSE	FALSE	ukb-saige-153	13	101235652	0.14	387318	0.22	Colorectal cancer || id:ukb-saige-153	Colorectal cancer	Colorectal cancer || ||	TRUE	MedicineITLab	0.0966407	1732	6.95344e-38	GGACT	TRUE	reported	finn-pQTL-R10-v1-GGACT	2	TRUE	0.0901515	171.415	195.968	173.777
rs12682112	C	A	C	A	0.668324	0.0094	0.138098	0.086	FALSE	FALSE	FALSE	ukb-saige-153	8	63924794	0.038	387318	0.81	Colorectal cancer || id:ukb-saige-153	Colorectal cancer	Colorectal cancer || ||	TRUE	MedicineITLab	0.0462103	1732	7.70549e-45	GGH	TRUE	reported	finn-pQTL-R10-v1-GGH	2	TRUE	0.106328	205.834	195.968	209.169
rs28393982	T	G	T	G	-0.25685	0.037	0.403962	0.31	FALSE	FALSE	FALSE	ukb-saige-153	8	64005582	0.023	387318	0.1	Colorectal cancer || id:ukb-saige-153	Colorectal cancer	Colorectal cancer || ||	TRUE	MedicineITLab	0.0346801	1732	2.01976e-13	GGH	TRUE	reported	finn-pQTL-R10-v1-GGH	2	TRUE	0.031769	56.7637	195.968	54.8528
rs5760492	A	G	A	G	0.334365	-0.029	0.333731	0.34	FALSE	FALSE	FALSE	ukb-saige-153	22	24995202	0.022	387318	0.19	Colorectal cancer || id:ukb-saige-153	Colorectal cancer	Colorectal cancer || ||	TRUE	MedicineITLab	0.0349658	1732	3.7853e-21	GGT1	TRUE	reported	finn-pQTL-R10-v1-GGT1	2	TRUE	0.0497185	90.5131	195.968	91.4439
rs188431829	G	A	G	A	-0.626779	0.083	0.0358636	0.019	FALSE	FALSE	FALSE	ukb-saige-153	22	24688702	0.08	387318	0.3	Colorectal cancer || id:ukb-saige-153	Colorectal cancer	Colorectal cancer || ||	TRUE	MedicineITLab	0.0917204	1732	1.14367e-11	GGT5	TRUE	reported	finn-pQTL-R10-v1-GGT5	2	TRUE	0.0271676	48.3125	195.968	46.6979
rs9624432	C	T	C	T	-0.36886	0.043	0.179328	0.21	FALSE	FALSE	FALSE	ukb-saige-153	22	24624347	0.026	387318	0.1	Colorectal cancer || id:ukb-saige-153	Colorectal cancer	Colorectal cancer || ||	TRUE	MedicineITLab	0.0449678	1732	4.53002e-16	GGT5	TRUE	reported	finn-pQTL-R10-v1-GGT5	2	TRUE	0.0400471	72.1717	195.968	67.2852
rs4590183	C	T	C	T	-0.621264	-0.032	0.25395	0.27	FALSE	FALSE	FALSE	ukb-saige-153	5	42626206	0.024	387318	0.19	Colorectal cancer || id:ukb-saige-153	Colorectal cancer	Colorectal cancer || ||	TRUE	MedicineITLab	0.0368149	1732	2.88138e-59	GHR	TRUE	reported	finn-pQTL-R10-v1-GHR	2	TRUE	0.146251	296.356	195.968	284.777
rs12530578	G	A	G	A	-0.630797	-0.018	0.329274	0.23	FALSE	FALSE	FALSE	ukb-saige-153	7	150218306	0.025	387318	0.47	Colorectal cancer || id:ukb-saige-153	Colorectal cancer	Colorectal cancer || ||	TRUE	MedicineITLab	0.0336122	1732	1.13815e-71	GIMAP7	TRUE	reported	finn-pQTL-R10-v1-GIMAP7	2	TRUE	0.175757	368.895	195.968	352.197
rs7810209	T	C	T	C	0.208799	-0.056	0.582909	0.58	FALSE	FALSE	FALSE	ukb-saige-153	7	150153813	0.022	387318	0.01	Colorectal cancer || id:ukb-saige-153	Colorectal cancer	Colorectal cancer || ||	TRUE	MedicineITLab	0.0351518	1732	3.43946e-09	GIMAP8	TRUE	reported	finn-pQTL-R10-v1-GIMAP8	2	TRUE	0.0211991	37.4688	195.968	35.2827
rs565164	A	G	A	G	-0.291702	0.024	0.213233	0.26	FALSE	FALSE	FALSE	ukb-saige-153	1	78560583	0.025	387318	0.32	Colorectal cancer || id:ukb-saige-153	Colorectal cancer	Colorectal cancer || ||	TRUE	MedicineITLab	0.0410262	1732	1.68927e-12	GIPC2	TRUE	reported	finn-pQTL-R10-v1-GIPC2	2	TRUE	0.0285502	50.8435	195.968	50.5541
rs148500211	A	G	A	G	-0.433721	0.0067	0.0841224	0.11	FALSE	FALSE	FALSE	ukb-saige-153	19	3587977	0.034	387318	0.84	Colorectal cancer || id:ukb-saige-153	Colorectal cancer	Colorectal cancer || ||	TRUE	MedicineITLab	0.0609442	1732	1.61324e-12	GIPC3	TRUE	reported	finn-pQTL-R10-v1-GIPC3	2	TRUE	0.0289868	51.6441	195.968	50.6473
rs6762132	G	A	G	A	-0.222899	-0.019	0.261377	0.31	FALSE	FALSE	FALSE	ukb-saige-153	3	33071627	0.023	387318	0.42	Colorectal cancer || id:ukb-saige-153	Colorectal cancer	Colorectal cancer || ||	TRUE	MedicineITLab	0.038173	1732	6.25216e-09	GLB1	TRUE	reported	finn-pQTL-R10-v1-GLB1	2	TRUE	0.0191839	33.8372	195.968	34.096
rs7311260	C	G	C	G	-0.291791	-0.01	0.338624	0.4	FALSE	TRUE	FALSE	ukb-saige-153	12	75837389	0.022	387318	0.64	Colorectal cancer || id:ukb-saige-153	Colorectal cancer	Colorectal cancer || ||	TRUE	MedicineITLab	0.0346073	1732	7.08925e-17	GLIPR1	TRUE	reported	finn-pQTL-R10-v1-GLIPR1	2	TRUE	0.0381364	68.5919	195.968	71.09
rs4746	G	T	G	T	-0.447226	-0.018	0.366756	0.46	FALSE	FALSE	FALSE	ukb-saige-153	6	38650628	0.021	387318	0.4	Colorectal cancer || id:ukb-saige-153	Colorectal cancer	Colorectal cancer || ||	TRUE	MedicineITLab	0.0338509	1732	4.8899e-38	GLO1	TRUE	reported	finn-pQTL-R10-v1-GLO1	2	TRUE	0.0929036	177.184	195.968	174.548
rs17462893	G	A	G	A	0.831605	0.029	0.109334	0.1	FALSE	FALSE	FALSE	ukb-saige-153	5	95163437	0.035	387318	0.42	Colorectal cancer || id:ukb-saige-153	Colorectal cancer	Colorectal cancer || ||	TRUE	MedicineITLab	0.0494876	1732	8.08351e-59	GLRX	TRUE	reported	finn-pQTL-R10-v1-GLRX	2	TRUE	0.13469	269.283	195.968	282.385
rs72785442	C	G	C	G	-0.923228	0.068	0.0319782	0.044	FALSE	TRUE	FALSE	ukb-saige-153	5	95325903	0.055	387318	0.22	Colorectal cancer || id:ukb-saige-153	Colorectal cancer	Colorectal cancer || ||	TRUE	MedicineITLab	0.0955251	1732	1.47571e-21	GLRX	TRUE	reported	finn-pQTL-R10-v1-GLRX	2	TRUE	0.05277	96.378	195.968	93.4078
rs117801489	C	T	C	T	0.845093	0.04	0.0376171	0.018	FALSE	FALSE	FALSE	ukb-saige-153	12	104408832	0.081	387318	0.62	Colorectal cancer || id:ukb-saige-153	Colorectal cancer	Colorectal cancer || ||	TRUE	MedicineITLab	0.0921314	1732	1.27262e-19	GLT8D2	TRUE	reported	finn-pQTL-R10-v1-GLT8D2	2	TRUE	0.0517097	94.3359	195.968	84.1383
rs137896815	T	C	T	C	-0.493298	0.023	0.0548624	0.041	FALSE	FALSE	FALSE	ukb-saige-153	5	150622492	0.054	387318	0.67	Colorectal cancer || id:ukb-saige-153	Colorectal cancer	Colorectal cancer || ||	TRUE	MedicineITLab	0.0736735	1732	2.89135e-11	GM2A	TRUE	reported	finn-pQTL-R10-v1-GM2A	2	TRUE	0.0252359	44.7884	195.968	44.8328
rs153478	G	A	G	A	-0.746255	-0.011	0.654397	0.64	FALSE	FALSE	FALSE	ukb-saige-153	5	150639439	0.022	387318	0.61	Colorectal cancer || id:ukb-saige-153	Colorectal cancer	Colorectal cancer || ||	TRUE	MedicineITLab	0.0316665	1732	1.00693e-106	GM2A	TRUE	reported	finn-pQTL-R10-v1-GM2A	2	TRUE	0.251897	582.516	195.968	555.36
rs6914805	T	C	T	C	0.261714	0.01	0.401071	0.26	FALSE	FALSE	FALSE	ukb-saige-153	6	16281187	0.024	387318	0.67	Colorectal cancer || id:ukb-saige-153	Colorectal cancer	Colorectal cancer || ||	TRUE	MedicineITLab	0.0346176	1732	6.49382e-14	GMPR	TRUE	reported	finn-pQTL-R10-v1-GMPR	2	TRUE	0.0329064	58.8651	195.968	57.1558
rs2296526	C	T	C	T	0.249996	0.0097	0.585665	0.63	FALSE	FALSE	FALSE	ukb-saige-153	20	57273885	0.022	387318	0.66	Colorectal cancer || id:ukb-saige-153	Colorectal cancer	Colorectal cancer || ||	TRUE	MedicineITLab	0.0345778	1732	7.22104e-13	GNAS	TRUE	reported	finn-pQTL-R10-v1-GNAS	2	TRUE	0.0303317	54.1153	195.968	52.2723
rs12151621	A	C	A	C	0.713026	0.011	0.273367	0.23	FALSE	FALSE	FALSE	ukb-saige-153	2	85934499	0.025	387318	0.66	Colorectal cancer || id:ukb-saige-153	Colorectal cancer	Colorectal cancer || ||	TRUE	MedicineITLab	0.0338257	1732	5.595e-88	GNLY	TRUE	reported	finn-pQTL-R10-v1-GNLY	2	TRUE	0.201977	437.857	195.968	444.342
rs140678194	A	G	A	G	0.477842	0.029	0.0715335	0.029	FALSE	FALSE	FALSE	ukb-saige-153	2	86350279	0.064	387318	0.65	Colorectal cancer || id:ukb-saige-153	Colorectal cancer	Colorectal cancer || ||	TRUE	MedicineITLab	0.0656335	1732	5.0269e-13	GNLY	TRUE	reported	finn-pQTL-R10-v1-GNLY	2	TRUE	0.0303301	54.1124	195.968	53.0051
rs73185102	G	A	G	A	-0.787016	0.0023	0.120547	0.075	FALSE	FALSE	FALSE	ukb-saige-153	4	44888573	0.041	387318	0.95	Colorectal cancer || id:ukb-saige-153	Colorectal cancer	Colorectal cancer || ||	TRUE	MedicineITLab	0.0485221	1732	3.48257e-55	GNPDA2	TRUE	reported	finn-pQTL-R10-v1-GNPDA2	2	TRUE	0.131331	261.552	195.968	263.08
rs66863998	C	T	C	T	-0.294913	-0.022	0.187346	0.13	FALSE	FALSE	FALSE	ukb-saige-153	17	4813404	0.032	387318	0.5	Colorectal cancer || id:ukb-saige-153	Colorectal cancer	Colorectal cancer || ||	TRUE	MedicineITLab	0.0433886	1732	1.46521e-11	GP1BA	TRUE	reported	finn-pQTL-R10-v1-GP1BA	2	TRUE	0.026483	47.062	195.968	46.1994
rs34230407	C	T	C	T	-0.275917	-0.028	0.536991	0.51	FALSE	FALSE	FALSE	ukb-saige-153	16	20340002	0.021	387318	0.18	Colorectal cancer || id:ukb-saige-153	Colorectal cancer	Colorectal cancer || ||	TRUE	MedicineITLab	0.0335159	1732	3.57108e-16	GP2	TRUE	reported	finn-pQTL-R10-v1-GP2	2	TRUE	0.0378568	68.0691	195.968	67.7728
rs12609736	G	A	G	A	0.642985	-0.034	0.881962	0.83	FALSE	FALSE	FALSE	ukb-saige-153	19	55545284	0.029	387318	0.24	Colorectal cancer || id:ukb-saige-153	Colorectal cancer	Colorectal cancer || ||	TRUE	MedicineITLab	0.0499041	1732	2.43893e-36	GP6	TRUE	reported	finn-pQTL-R10-v1-GP6	2	TRUE	0.0860802	162.945	195.968	166.008
rs149376229	T	G	T	G	0.575324	0.024	0.107633	0.11	FALSE	FALSE	FALSE	ukb-saige-153	2	241414797	0.035	387318	0.48	Colorectal cancer || id:ukb-saige-153	Colorectal cancer	Colorectal cancer || ||	TRUE	MedicineITLab	0.0533715	1732	2.87409e-26	GPC1	TRUE	reported	finn-pQTL-R10-v1-GPC1	2	TRUE	0.0635834	117.468	195.968	116.2
rs342702	T	G	T	G	-0.864027	0.035	0.324314	0.27	FALSE	FALSE	FALSE	ukb-saige-153	13	92422946	0.024	387318	0.15	Colorectal cancer || id:ukb-saige-153	Colorectal cancer	Colorectal cancer || ||	TRUE	MedicineITLab	0.0301237	1732	2.42661e-148	GPC5	TRUE	reported	finn-pQTL-R10-v1-GPC5	2	TRUE	0.327186	841.292	195.968	822.693
rs7327320	C	T	C	T	-0.428992	0.029	0.722148	0.8	FALSE	FALSE	FALSE	ukb-saige-153	13	92043151	0.027	387318	0.29	Colorectal cancer || id:ukb-saige-153	Colorectal cancer	Colorectal cancer || ||	TRUE	MedicineITLab	0.0365775	1732	1.27321e-30	GPC5	TRUE	reported	finn-pQTL-R10-v1-GPC5	2	TRUE	0.073853	137.954	195.968	137.553
rs78084721	A	G	A	G	1.15976	-0.074	0.0272404	0.031	FALSE	FALSE	FALSE	ukb-saige-153	13	92018650	0.061	387318	0.23	Colorectal cancer || id:ukb-saige-153	Colorectal cancer	Colorectal cancer || ||	TRUE	MedicineITLab	0.101093	1732	2.04503e-29	GPC5	TRUE	reported	finn-pQTL-R10-v1-GPC5	2	TRUE	0.0712829	132.785	195.968	131.612
rs7460860	C	T	C	T	0.403874	-0.026	0.462266	0.61	FALSE	FALSE	FALSE	ukb-saige-153	8	144304941	0.022	387318	0.23	Colorectal cancer || id:ukb-saige-153	Colorectal cancer	Colorectal cancer || ||	TRUE	MedicineITLab	0.0326788	1732	1.09951e-33	GPIHBP1	TRUE	reported	finn-pQTL-R10-v1-GPIHBP1	2	TRUE	0.0810926	152.671	195.968	152.742
rs138631872	G	T	G	T	1.52946	0.33	0.0678089	0.0039	FALSE	FALSE	FALSE	ukb-saige-153	7	23253600	0.17	387318	0.056	Colorectal cancer || id:ukb-saige-153	Colorectal cancer	Colorectal cancer || ||	TRUE	MedicineITLab	0.0586622	1732	1.14551e-126	GPNMB	TRUE	reported	finn-pQTL-R10-v1-GPNMB	2	TRUE	0.295732	726.45	195.968	679.766
rs75801644	A	G	A	G	-1.14125	-0.041	0.0185391	0.023	FALSE	FALSE	FALSE	ukb-saige-153	7	23306141	0.071	387318	0.57	Colorectal cancer || id:ukb-saige-153	Colorectal cancer	Colorectal cancer || ||	TRUE	MedicineITLab	0.125906	1732	3.3037e-19	GPNMB	TRUE	reported	finn-pQTL-R10-v1-GPNMB	2	TRUE	0.0473973	86.0771	195.968	82.1616
rs76515453	C	A	C	A	-0.923435	-0.04	0.01319	0.018	FALSE	FALSE	FALSE	ukb-saige-153	9	37559475	0.083	387318	0.63	Colorectal cancer || id:ukb-saige-153	Colorectal cancer	Colorectal cancer || ||	TRUE	MedicineITLab	0.151299	1732	1.27897e-09	GRHPR	TRUE	reported	finn-pQTL-R10-v1-GRHPR	2	TRUE	0.0221984	39.275	195.968	37.2512
rs61175673	T	G	T	G	0.99274	-0.049	0.0400953	0.029	FALSE	FALSE	FALSE	ukb-saige-153	6	101380072	0.063	387318	0.44	Colorectal cancer || id:ukb-saige-153	Colorectal cancer	Colorectal cancer || ||	TRUE	MedicineITLab	0.0845447	1732	1.0937e-30	GRIK2	TRUE	reported	finn-pQTL-R10-v1-GRIK2	2	TRUE	0.0758617	142.014	195.968	137.879
rs5848	T	C	T	C	-0.288576	0.027	0.35166	0.28	FALSE	FALSE	FALSE	ukb-saige-153	17	42430244	0.024	387318	0.26	Colorectal cancer || id:ukb-saige-153	Colorectal cancer	Colorectal cancer || ||	TRUE	MedicineITLab	0.0347156	1732	1.87025e-16	GRN	TRUE	reported	finn-pQTL-R10-v1-GRN	2	TRUE	0.0379731	68.2865	195.968	69.0989
rs7230581	G	A	G	A	0.452533	0.034	0.23401	0.17	FALSE	FALSE	FALSE	ukb-saige-153	18	56876563	0.029	387318	0.24	Colorectal cancer || id:ukb-saige-153	Colorectal cancer	Colorectal cancer || ||	TRUE	MedicineITLab	0.0396769	1732	4.18215e-29	GRP	TRUE	reported	finn-pQTL-R10-v1-GRP	2	TRUE	0.0734155	137.072	195.968	130.084
rs12336718	A	G	A	G	-0.544135	0.022	0.0300061	0.0069	FALSE	FALSE	FALSE	ukb-saige-153	9	124071744	0.13	387318	0.86	Colorectal cancer || id:ukb-saige-153	Colorectal cancer	Colorectal cancer || ||	TRUE	MedicineITLab	0.0993388	1732	4.94561e-08	GSN	TRUE	reported	finn-pQTL-R10-v1-GSN	2	TRUE	0.0172354	30.3402	195.968	30.0037
rs186990719	A	G	A	G	-0.82796	0.15	0.0417505	0.0028	FALSE	FALSE	FALSE	ukb-saige-153	8	30682936	0.22	387318	0.49	Colorectal cancer || id:ukb-saige-153	Colorectal cancer	Colorectal cancer || ||	TRUE	MedicineITLab	0.0831121	1732	9.05733e-23	GSR	TRUE	reported	finn-pQTL-R10-v1-GSR	2	TRUE	0.0548516	100.4	195.968	99.2408
rs57583541	G	T	G	T	-0.257668	0.049	0.198553	0.21	FALSE	FALSE	FALSE	ukb-saige-153	8	30207179	0.026	387318	0.061	Colorectal cancer || id:ukb-saige-153	Colorectal cancer	Colorectal cancer || ||	TRUE	MedicineITLab	0.0421355	1732	1.18938e-09	GSR	TRUE	reported	finn-pQTL-R10-v1-GSR	2	TRUE	0.0211301	37.3442	195.968	37.396
rs2749005	G	T	G	T	0.297959	-0.0084	0.62531	0.65	FALSE	FALSE	FALSE	ukb-saige-153	6	52621433	0.022	387318	0.71	Colorectal cancer || id:ukb-saige-153	Colorectal cancer	Colorectal cancer || ||	TRUE	MedicineITLab	0.0346673	1732	1.83316e-17	GSTA1	TRUE	reported	finn-pQTL-R10-v1-GSTA1	2	TRUE	0.0416016	75.0949	195.968	73.8708
rs2749005	G	T	G	T	0.270737	-0.0084	0.62531	0.65	FALSE	FALSE	FALSE	ukb-saige-153	6	52621433	0.022	387318	0.71	Colorectal cancer || id:ukb-saige-153	Colorectal cancer	Colorectal cancer || ||	TRUE	MedicineITLab	0.0347961	1732	1.2314e-14	GSTA3	TRUE	reported	finn-pQTL-R10-v1-GSTA3	2	TRUE	0.0343473	61.5344	195.968	60.5388
rs139053596	C	T	C	T	1.15119	-0.016	0.0333017	0.015	FALSE	FALSE	FALSE	ukb-saige-153	22	24714902	0.091	387318	0.86	Colorectal cancer || id:ukb-saige-153	Colorectal cancer	Colorectal cancer || ||	TRUE	MedicineITLab	0.0919862	1732	1.83316e-34	GSTT2B	TRUE	reported	finn-pQTL-R10-v1-GSTT2B	2	TRUE	0.085326	161.384	195.968	156.621
rs2071500	A	G	A	G	-0.35238	-0.059	0.0846398	0.045	FALSE	FALSE	FALSE	ukb-saige-153	1	42629346	0.051	387318	0.26	Colorectal cancer || id:ukb-saige-153	Colorectal cancer	Colorectal cancer || ||	TRUE	MedicineITLab	0.0612041	1732	1.00823e-08	GUCA2A	TRUE	reported	finn-pQTL-R10-v1-GUCA2A	2	TRUE	0.0192406	33.9393	195.968	33.1483
rs2273844	A	G	A	G	-0.434488	-0.029	0.191555	0.22	FALSE	FALSE	FALSE	ukb-saige-153	14	25103414	0.026	387318	0.27	Colorectal cancer || id:ukb-saige-153	Colorectal cancer	Colorectal cancer || ||	TRUE	MedicineITLab	0.0411559	1732	2.71644e-25	GZMB	TRUE	reported	finn-pQTL-R10-v1-GZMB	2	TRUE	0.0584695	107.434	195.968	111.453
rs190749747	G	C	G	C	-1.83697	-0.089	0.00377442	0.011	FALSE	TRUE	FALSE	ukb-saige-153	14	25076303	0.11	387318	0.41	Colorectal cancer || id:ukb-saige-153	Colorectal cancer	Colorectal cancer || ||	TRUE	MedicineITLab	0.279449	1732	6.48634e-11	GZMH	TRUE	reported	finn-pQTL-R10-v1-GZMH	2	TRUE	0.0253771	45.0455	195.968	43.2115
rs31223	C	T	C	T	-0.220158	-0.018	0.41574	0.38	FALSE	FALSE	FALSE	ukb-saige-153	5	156625279	0.022	387318	0.41	Colorectal cancer || id:ukb-saige-153	Colorectal cancer	Colorectal cancer || ||	TRUE	MedicineITLab	0.0336991	1732	8.45084e-11	HAVCR1	TRUE	reported	finn-pQTL-R10-v1-HAVCR1	2	TRUE	0.0235465	41.7178	195.968	42.6808
rs953569	G	T	G	T	-0.618781	-0.032	0.43983	0.47	FALSE	FALSE	FALSE	ukb-saige-153	5	156477400	0.021	387318	0.14	Colorectal cancer || id:ukb-saige-153	Colorectal cancer	Colorectal cancer || ||	TRUE	MedicineITLab	0.031592	1732	2.57691e-77	HAVCR1	TRUE	reported	finn-pQTL-R10-v1-HAVCR1	2	TRUE	0.188673	402.308	195.968	383.636
rs76837537	A	G	A	G	-1.29324	-0.032	0.0288333	0.007	FALSE	FALSE	FALSE	ukb-saige-153	5	155866630	0.13	387318	0.81	Colorectal cancer || id:ukb-saige-153	Colorectal cancer	Colorectal cancer || ||	TRUE	MedicineITLab	0.0972607	1732	1.74743e-38	HAVCR2	TRUE	reported	finn-pQTL-R10-v1-HAVCR2	2	TRUE	0.0936648	178.786	195.968	176.8
rs115533396	A	G	A	G	0.620971	-0.12	0.028214	0.02	FALSE	FALSE	FALSE	ukb-saige-153	6	30939251	0.077	387318	0.12	Colorectal cancer || id:ukb-saige-153	Colorectal cancer	Colorectal cancer || ||	TRUE	MedicineITLab	0.0989407	1732	4.37572e-10	HCG22	TRUE	reported	finn-pQTL-R10-v1-HCG22	2	TRUE	0.021145	37.3711	195.968	39.3906
rs2442753	C	T	C	T	0.339585	-0.054	0.283484	0.26	FALSE	FALSE	FALSE	ukb-saige-153	6	31351733	0.025	387318	0.027	Colorectal cancer || id:ukb-saige-153	Colorectal cancer	Colorectal cancer || ||	TRUE	MedicineITLab	0.0360247	1732	1.31069e-20	HCG22	TRUE	reported	finn-pQTL-R10-v1-HCG22	2	TRUE	0.046847	85.0286	195.968	88.8579
rs2905757	T	C	T	C	0.638403	-0.001	0.353594	0.32	FALSE	FALSE	FALSE	ukb-saige-153	6	31022828	0.023	387318	0.96	Colorectal cancer || id:ukb-saige-153	Colorectal cancer	Colorectal cancer || ||	TRUE	MedicineITLab	0.0318624	1732	1.77664e-80	HCG22	TRUE	reported	finn-pQTL-R10-v1-HCG22	2	TRUE	0.186307	396.11	195.968	401.451
rs112982980	G	T	G	T	-0.70801	-0.0082	0.104259	0.18	FALSE	FALSE	FALSE	ukb-saige-153	6	125622737	0.028	387318	0.77	Colorectal cancer || id:ukb-saige-153	Colorectal cancer	Colorectal cancer || ||	TRUE	MedicineITLab	0.0533115	1732	2.12276e-38	HDDC2	TRUE	reported	finn-pQTL-R10-v1-HDDC2	2	TRUE	0.0936278	178.708	195.968	176.375
rs12039810	A	G	A	G	1.06594	-0.031	0.359971	0.34	FALSE	FALSE	FALSE	ukb-saige-153	1	156727253	0.023	387318	0.17	Colorectal cancer || id:ukb-saige-153	Colorectal cancer	Colorectal cancer || ||	TRUE	MedicineITLab	0.0236336	1732	1e-200	HDGF	TRUE	reported	finn-pQTL-R10-v1-HDGF	2	TRUE	0.523555	1901.06	195.968	2034.26
rs4565704	C	G	C	G	-0.247116	-0.0062	0.817174	0.75	FALSE	TRUE	FALSE	ukb-saige-153	1	156663335	0.025	387318	0.8	Colorectal cancer || id:ukb-saige-153	Colorectal cancer	Colorectal cancer || ||	TRUE	MedicineITLab	0.0442301	1732	2.67781e-08	HDGF	TRUE	reported	finn-pQTL-R10-v1-HDGF	2	TRUE	0.0182467	32.1535	195.968	31.2152
rs13108218	G	A	G	A	0.232268	0.033	0.665927	0.62	FALSE	FALSE	FALSE	ukb-saige-153	4	3443931	0.022	387318	0.13	Colorectal cancer || id:ukb-saige-153	Colorectal cancer	Colorectal cancer || ||	TRUE	MedicineITLab	0.0356371	1732	9.34545e-11	HGFAC	TRUE	reported	finn-pQTL-R10-v1-HGFAC	2	TRUE	0.0240036	42.5476	195.968	42.479
rs362295	T	C	T	C	0.285613	-0.047	0.131148	0.083	FALSE	FALSE	FALSE	ukb-saige-153	4	3247101	0.039	387318	0.22	Colorectal cancer || id:ukb-saige-153	Colorectal cancer	Colorectal cancer || ||	TRUE	MedicineITLab	0.0507765	1732	2.16043e-08	HGFAC	TRUE	reported	finn-pQTL-R10-v1-HGFAC	2	TRUE	0.0185906	32.771	195.968	31.6396
rs4690097	T	C	T	C	-0.410611	0.019	0.763936	0.68	FALSE	FALSE	FALSE	ukb-saige-153	4	3445745	0.023	387318	0.41	Colorectal cancer || id:ukb-saige-153	Colorectal cancer	Colorectal cancer || ||	TRUE	MedicineITLab	0.0392497	1732	7.04531e-25	HGFAC	TRUE	reported	finn-pQTL-R10-v1-HGFAC	2	TRUE	0.0608104	112.014	195.968	109.443
rs75466623	T	C	T	C	-0.823021	-0.056	0.0238002	0.017	FALSE	FALSE	FALSE	ukb-saige-153	1	145414458	0.097	387318	0.56	Colorectal cancer || id:ukb-saige-153	Colorectal cancer	Colorectal cancer || ||	TRUE	MedicineITLab	0.114885	1732	1.15585e-12	HJV	TRUE	reported	finn-pQTL-R10-v1-HJV	2	TRUE	0.0314754	56.222	195.968	51.321
rs1610649	C	T	C	T	0.656375	0.024	0.265673	0.39	FALSE	FALSE	FALSE	ukb-saige-153	6	29768917	0.022	387318	0.28	Colorectal cancer || id:ukb-saige-153	Colorectal cancer	Colorectal cancer || ||	TRUE	MedicineITLab	0.0351563	1732	5.14754e-71	HLA-A	TRUE	reported	finn-pQTL-R10-v1-HLA-A	2	TRUE	0.168101	349.58	195.968	348.576
rs9272293	G	A	G	A	0.361314	0.066	0.445334	0.62	FALSE	FALSE	FALSE	ukb-saige-153	6	32603742	0.022	387318	0.0027	Colorectal cancer || id:ukb-saige-153	Colorectal cancer	Colorectal cancer || ||	TRUE	MedicineITLab	0.0324214	1732	6.63437e-28	HLA-DRA	TRUE	reported	finn-pQTL-R10-v1-HLA-DRA	2	TRUE	0.0644937	119.266	195.968	124.196
rs2524143	C	T	C	T	-0.267847	-0.024	0.76097	0.7	FALSE	FALSE	FALSE	ukb-saige-153	6	31263510	0.023	387318	0.29	Colorectal cancer || id:ukb-saige-153	Colorectal cancer	Colorectal cancer || ||	TRUE	MedicineITLab	0.0395786	1732	1.78813e-11	HLA-E	TRUE	reported	finn-pQTL-R10-v1-HLA-E	2	TRUE	0.026099	46.3612	195.968	45.7987
rs1009502	A	G	A	G	-0.258222	-0.039	0.253941	0.33	FALSE	FALSE	FALSE	ukb-saige-153	9	132956229	0.023	387318	0.087	Colorectal cancer || id:ukb-saige-153	Colorectal cancer	Colorectal cancer || ||	TRUE	MedicineITLab	0.0392303	1732	6.12774e-11	HMCN2	TRUE	reported	finn-pQTL-R10-v1-HMCN2	2	TRUE	0.0252652	44.8417	195.968	43.3255
rs10793978	G	C	G	C	0.329648	0.0018	0.738961	0.81	FALSE	TRUE	FALSE	ukb-saige-153	9	133229506	0.028	387318	0.95	Colorectal cancer || id:ukb-saige-153	Colorectal cancer	Colorectal cancer || ||	TRUE	MedicineITLab	0.0380974	1732	1.12824e-17	HMCN2	TRUE	reported	finn-pQTL-R10-v1-HMCN2	2	TRUE	0.0419235	75.7014	195.968	74.8704
rs62579979	C	A	C	A	0.329471	0.044	0.169866	0.097	FALSE	FALSE	FALSE	ukb-saige-153	9	133369780	0.036	387318	0.22	Colorectal cancer || id:ukb-saige-153	Colorectal cancer	Colorectal cancer || ||	TRUE	MedicineITLab	0.0443798	1732	1.77542e-13	HMCN2	TRUE	reported	finn-pQTL-R10-v1-HMCN2	2	TRUE	0.0306139	54.6347	195.968	55.1142
rs6478957	A	G	A	G	0.662588	-0.011	0.53818	0.51	FALSE	FALSE	FALSE	ukb-saige-153	9	133048501	0.021	387318	0.61	Colorectal cancer || id:ukb-saige-153	Colorectal cancer	Colorectal cancer || ||	TRUE	MedicineITLab	0.0303027	1732	8.84912e-94	HMCN2	TRUE	reported	finn-pQTL-R10-v1-HMCN2	2	TRUE	0.218231	482.931	195.968	478.106
rs11558538	T	C	T	C	-1.11835	0.0016	0.156178	0.11	FALSE	FALSE	FALSE	ukb-saige-153	2	138759649	0.034	387318	0.96	Colorectal cancer || id:ukb-saige-153	Colorectal cancer	Colorectal cancer || ||	TRUE	MedicineITLab	0.0387309	1732	5.71479e-150	HNMT	TRUE	reported	finn-pQTL-R10-v1-HNMT	2	TRUE	0.329652	850.75	195.968	833.759
rs79498642	T	C	T	C	-0.274538	-0.00086	0.150459	0.074	FALSE	FALSE	FALSE	ukb-saige-153	2	138873537	0.041	387318	0.98	Colorectal cancer || id:ukb-saige-153	Colorectal cancer	Colorectal cancer || ||	TRUE	MedicineITLab	0.0452002	1732	1.53222e-09	HNMT	TRUE	reported	finn-pQTL-R10-v1-HNMT	2	TRUE	0.019268	33.9886	195.968	36.8913
rs6735172	G	A	G	A	0.310884	0.039	0.167615	0.14	FALSE	FALSE	FALSE	ukb-saige-153	2	10475013	0.031	387318	0.21	Colorectal cancer || id:ukb-saige-153	Colorectal cancer	Colorectal cancer || ||	TRUE	MedicineITLab	0.04458	1732	4.37925e-12	HPCAL1	TRUE	reported	finn-pQTL-R10-v1-HPCAL1	2	TRUE	0.0269689	47.9494	195.968	48.6314
rs72665697	G	A	G	A	-1.16758	0.008	0.0743106	0.04	FALSE	FALSE	FALSE	ukb-saige-153	4	95267347	0.056	387318	0.89	Colorectal cancer || id:ukb-saige-153	Colorectal cancer	Colorectal cancer || ||	TRUE	MedicineITLab	0.0588251	1732	3.77311e-79	HPGDS	TRUE	reported	finn-pQTL-R10-v1-HPGDS	2	TRUE	0.187551	399.364	195.968	393.956
rs9998896	A	G	A	G	0.26499	-0.039	0.184395	0.16	FALSE	FALSE	FALSE	ukb-saige-153	4	94816722	0.03	387318	0.19	Colorectal cancer || id:ukb-saige-153	Colorectal cancer	Colorectal cancer || ||	TRUE	MedicineITLab	0.0431747	1732	1.03624e-09	HPGDS	TRUE	reported	finn-pQTL-R10-v1-HPGDS	2	TRUE	0.0211212	37.328	195.968	37.6704
rs61751211	C	T	C	T	-0.512643	0.12	0.0385037	0.011	FALSE	FALSE	FALSE	ukb-saige-153	4	84223426	0.11	387318	0.28	Colorectal cancer || id:ukb-saige-153	Colorectal cancer	Colorectal cancer || ||	TRUE	MedicineITLab	0.0902223	1732	1.55905e-08	HPSE	TRUE	reported	finn-pQTL-R10-v1-HPSE	2	TRUE	0.0194585	34.3313	195.968	32.2851
rs66965282	G	A	G	A	0.525573	0.0097	0.14902	0.14	FALSE	FALSE	FALSE	ukb-saige-153	3	186358768	0.031	387318	0.75	Colorectal cancer || id:ukb-saige-153	Colorectal cancer	Colorectal cancer || ||	TRUE	MedicineITLab	0.0459344	1732	2.834e-29	HRG	TRUE	reported	finn-pQTL-R10-v1-HRG	2	TRUE	0.0700584	130.332	195.968	130.915
rs78904050	C	T	C	T	-0.960544	0.11	0.0279209	0.022	FALSE	FALSE	FALSE	ukb-saige-153	3	186387243	0.072	387318	0.13	Colorectal cancer || id:ukb-saige-153	Colorectal cancer	Colorectal cancer || ||	TRUE	MedicineITLab	0.102388	1732	1.97061e-20	HRG	TRUE	reported	finn-pQTL-R10-v1-HRG	2	TRUE	0.0500836	91.2129	195.968	88.0109
rs11694519	T	C	T	C	0.33039	-0.012	0.230486	0.17	FALSE	FALSE	FALSE	ukb-saige-153	2	20784873	0.029	387318	0.68	Colorectal cancer || id:ukb-saige-153	Colorectal cancer	Colorectal cancer || ||	TRUE	MedicineITLab	0.0403195	1732	4.84842e-16	HS1BP3	TRUE	reported	finn-pQTL-R10-v1-HS1BP3	2	TRUE	0.0387208	69.6853	195.968	67.1465
rs62053877	A	G	A	G	0.272273	-0.017	0.326395	0.39	FALSE	FALSE	FALSE	ukb-saige-153	17	13835308	0.022	387318	0.44	Colorectal cancer || id:ukb-saige-153	Colorectal cancer	Colorectal cancer || ||	TRUE	MedicineITLab	0.0371471	1732	3.52696e-13	HS3ST3B1	TRUE	reported	finn-pQTL-R10-v1-HS3ST3B1	2	TRUE	0.0325978	58.2944	195.968	53.7229
rs6430976	G	A	G	A	0.499787	0.077	0.933599	0.98	FALSE	FALSE	FALSE	ukb-saige-153	2	128822385	0.074	387318	0.3	Colorectal cancer || id:ukb-saige-153	Colorectal cancer	Colorectal cancer || ||	TRUE	MedicineITLab	0.0670733	1732	1.45178e-13	HS6ST1	TRUE	reported	finn-pQTL-R10-v1-HS6ST1	2	TRUE	0.0309696	55.2896	195.968	55.5227
rs6761320	T	C	T	C	-0.246397	0.019	0.398794	0.43	FALSE	FALSE	FALSE	ukb-saige-153	2	129050354	0.022	387318	0.38	Colorectal cancer || id:ukb-saige-153	Colorectal cancer	Colorectal cancer || ||	TRUE	MedicineITLab	0.0347324	1732	1.89017e-12	HS6ST1	TRUE	reported	finn-pQTL-R10-v1-HS6ST1	2	TRUE	0.029112	51.874	195.968	50.327
rs74368763	A	G	A	G	-1.80759	-0.012	0.0124315	0.016	FALSE	FALSE	FALSE	ukb-saige-153	2	129357322	0.086	387318	0.89	Colorectal cancer || id:ukb-saige-153	Colorectal cancer	Colorectal cancer || ||	TRUE	MedicineITLab	0.148219	1732	7.0583e-33	HS6ST1	TRUE	reported	finn-pQTL-R10-v1-HS6ST1	2	TRUE	0.080227	150.899	195.968	148.728
rs2549657	C	T	C	T	-0.397131	0.034	0.33108	0.35	FALSE	FALSE	FALSE	ukb-saige-153	16	83790467	0.022	387318	0.12	Colorectal cancer || id:ukb-saige-153	Colorectal cancer	Colorectal cancer || ||	TRUE	MedicineITLab	0.0348336	1732	4.39542e-29	HSBP1	TRUE	reported	finn-pQTL-R10-v1-HSBP1	2	TRUE	0.0698562	129.927	195.968	129.978
rs67805160	T	G	T	G	0.23796	0.006	0.195226	0.19	FALSE	FALSE	FALSE	ukb-saige-153	16	83734755	0.027	387318	0.83	Colorectal cancer || id:ukb-saige-153	Colorectal cancer	Colorectal cancer || ||	TRUE	MedicineITLab	0.0422974	1732	2.14842e-08	HSBP1	TRUE	reported	finn-pQTL-R10-v1-HSBP1	2	TRUE	0.017793	31.3395	195.968	31.6505
rs116979565	T	C	T	C	1.00597	-0.063	0.0291333	0.01	FALSE	FALSE	FALSE	ukb-saige-153	19	49337577	0.11	387318	0.56	Colorectal cancer || id:ukb-saige-153	Colorectal cancer	Colorectal cancer || ||	TRUE	MedicineITLab	0.0980308	1732	5.03385e-24	HSD17B14	TRUE	reported	finn-pQTL-R10-v1-HSD17B14	2	TRUE	0.0572466	105.05	195.968	105.304
rs35230038	A	G	A	G	-1.56581	0.047	0.0424308	0.045	FALSE	FALSE	FALSE	ukb-saige-153	19	49300431	0.053	387318	0.37	Colorectal cancer || id:ukb-saige-153	Colorectal cancer	Colorectal cancer || ||	TRUE	MedicineITLab	0.074221	1732	4.19276e-88	HSD17B14	TRUE	reported	finn-pQTL-R10-v1-HSD17B14	2	TRUE	0.199232	430.427	195.968	445.066
rs3745705	C	T	C	T	-0.427313	0.042	0.145208	0.077	FALSE	FALSE	FALSE	ukb-saige-153	19	49342269	0.04	387318	0.29	Colorectal cancer || id:ukb-saige-153	Colorectal cancer	Colorectal cancer || ||	TRUE	MedicineITLab	0.0471892	1732	3.57437e-19	HSD17B14	TRUE	reported	finn-pQTL-R10-v1-HSD17B14	2	TRUE	0.0453287	82.142	195.968	81.9987
rs10124737	A	G	A	G	-0.50853	0.14	0.0433161	0.012	FALSE	FALSE	FALSE	ukb-saige-153	9	115133699	0.099	387318	0.17	Colorectal cancer || id:ukb-saige-153	Colorectal cancer	Colorectal cancer || ||	TRUE	MedicineITLab	0.0816912	1732	6.02837e-10	HSDL2	TRUE	reported	finn-pQTL-R10-v1-HSDL2	2	TRUE	0.0214329	37.891	195.968	38.751
rs10817342	T	C	T	C	0.994762	0.0082	0.435292	0.38	FALSE	FALSE	FALSE	ukb-saige-153	9	115199507	0.022	387318	0.71	Colorectal cancer || id:ukb-saige-153	Colorectal cancer	Colorectal cancer || ||	TRUE	MedicineITLab	0.0245698	1732	1e-200	HSDL2	TRUE	reported	finn-pQTL-R10-v1-HSDL2	2	TRUE	0.486489	1638.96	195.968	1639.21
rs113764200	C	A	C	A	0.256211	0.044	0.173807	0.11	FALSE	FALSE	FALSE	ukb-saige-153	9	115714400	0.035	387318	0.21	Colorectal cancer || id:ukb-saige-153	Colorectal cancer	Colorectal cancer || ||	TRUE	MedicineITLab	0.0455392	1732	2.14511e-08	HSDL2	TRUE	reported	finn-pQTL-R10-v1-HSDL2	2	TRUE	0.0188527	33.2419	195.968	31.6537
rs7041171	C	T	C	T	0.320465	0.022	0.249818	0.19	FALSE	FALSE	FALSE	ukb-saige-153	9	114701630	0.027	387318	0.42	Colorectal cancer || id:ukb-saige-153	Colorectal cancer	Colorectal cancer || ||	TRUE	MedicineITLab	0.0392225	1732	5.86543e-16	HSDL2	TRUE	reported	finn-pQTL-R10-v1-HSDL2	2	TRUE	0.038493	69.2588	195.968	66.7561
rs405722	A	C	A	C	-0.512292	-0.039	0.0721709	0.059	FALSE	FALSE	FALSE	ukb-saige-153	6	31685945	0.046	387318	0.39	Colorectal cancer || id:ukb-saige-153	Colorectal cancer	Colorectal cancer || ||	TRUE	MedicineITLab	0.0653952	1732	8.19596e-15	HSPA1A	TRUE	reported	finn-pQTL-R10-v1-HSPA1A	2	TRUE	0.0351476	63.0203	195.968	61.3682
rs2868371	G	C	G	C	-0.468257	0.013	0.215101	0.24	FALSE	TRUE	FALSE	ukb-saige-153	7	75930759	0.025	387318	0.59	Colorectal cancer || id:ukb-saige-153	Colorectal cancer	Colorectal cancer || ||	TRUE	MedicineITLab	0.039795	1732	8.35795e-31	HSPB1	TRUE	reported	finn-pQTL-R10-v1-HSPB1	2	TRUE	0.074038	138.327	195.968	138.456
rs2305562	G	A	G	A	0.217823	0.0044	0.547614	0.53	FALSE	FALSE	FALSE	ukb-saige-153	1	22183739	0.022	387318	0.84	Colorectal cancer || id:ukb-saige-153	Colorectal cancer	Colorectal cancer || ||	TRUE	MedicineITLab	0.0341594	1732	2.31622e-10	HSPG2	TRUE	reported	finn-pQTL-R10-v1-HSPG2	2	TRUE	0.0235083	41.6484	195.968	40.6618
rs116482870	T	C	T	C	-0.660758	0.012	0.0665874	0.063	FALSE	FALSE	FALSE	ukb-saige-153	3	50339622	0.044	387318	0.78	Colorectal cancer || id:ukb-saige-153	Colorectal cancer	Colorectal cancer || ||	TRUE	MedicineITLab	0.0682163	1732	1.20948e-21	HYAL1	TRUE	reported	finn-pQTL-R10-v1-HYAL1	2	TRUE	0.0542726	99.2798	195.968	93.8228
rs5030377	G	A	G	A	0.391112	0.0022	0.4026	0.38	FALSE	FALSE	FALSE	ukb-saige-153	19	10393234	0.022	387318	0.92	Colorectal cancer || id:ukb-saige-153	Colorectal cancer	Colorectal cancer || ||	TRUE	MedicineITLab	0.0326383	1732	7.62957e-32	ICAM1	TRUE	reported	finn-pQTL-R10-v1-ICAM1	2	TRUE	0.0735819	137.407	195.968	143.598
rs79024019	A	G	A	G	0.611729	0.1	0.0322658	0.015	FALSE	FALSE	FALSE	ukb-saige-153	19	10287129	0.089	387318	0.26	Colorectal cancer || id:ukb-saige-153	Colorectal cancer	Colorectal cancer || ||	TRUE	MedicineITLab	0.0924547	1732	4.88877e-11	ICAM1	TRUE	reported	finn-pQTL-R10-v1-ICAM1	2	TRUE	0.0233694	41.3964	195.968	43.7784
rs61451658	T	C	T	C	0.369998	-0.06	0.315917	0.31	FALSE	FALSE	FALSE	ukb-saige-153	19	10451920	0.023	387318	0.0096	Colorectal cancer || id:ukb-saige-153	Colorectal cancer	Colorectal cancer || ||	TRUE	MedicineITLab	0.0360609	1732	5.1027e-24	ICAM3	TRUE	reported	finn-pQTL-R10-v1-ICAM3	2	TRUE	0.0591712	108.804	195.968	105.275
rs281439	C	G	C	G	0.93605	-0.0032	0.772521	0.78	FALSE	TRUE	FALSE	ukb-saige-153	19	10400110	0.026	387318	0.9	Colorectal cancer || id:ukb-saige-153	Colorectal cancer	Colorectal cancer || ||	TRUE	MedicineITLab	0.0329818	1732	8.531e-146	ICAM5	TRUE	reported	finn-pQTL-R10-v1-ICAM5	2	TRUE	0.30795	769.818	195.968	805.47
rs74999582	A	G	A	G	-0.494332	0.23	0.0425882	0.0078	FALSE	FALSE	FALSE	ukb-saige-153	19	10738314	0.13	387318	0.073	Colorectal cancer || id:ukb-saige-153	Colorectal cancer	Colorectal cancer || ||	TRUE	MedicineITLab	0.0851089	1732	7.49808e-09	ICAM5	TRUE	reported	finn-pQTL-R10-v1-ICAM5	2	TRUE	0.0199276	35.1758	195.968	33.7355
rs2070562	C	T	C	T	-0.314714	0.015	0.231013	0.22	FALSE	FALSE	FALSE	ukb-saige-153	21	45674095	0.026	387318	0.57	Colorectal cancer || id:ukb-saige-153	Colorectal cancer	Colorectal cancer || ||	TRUE	MedicineITLab	0.0405227	1732	1.37341e-14	ICOSLG	TRUE	reported	finn-pQTL-R10-v1-ICOSLG	2	TRUE	0.0351899	63.0989	195.968	60.3164
rs7069123	C	T	C	T	-0.258485	0.015	0.561622	0.52	FALSE	FALSE	FALSE	ukb-saige-153	10	1024214	0.021	387318	0.47	Colorectal cancer || id:ukb-saige-153	Colorectal cancer	Colorectal cancer || ||	TRUE	MedicineITLab	0.0336794	1732	2.74853e-14	IDI2	TRUE	reported	finn-pQTL-R10-v1-IDI2	2	TRUE	0.0328998	58.8529	195.968	58.9036
rs7010461	T	C	T	C	0.217526	0.015	0.288919	0.33	FALSE	FALSE	FALSE	ukb-saige-153	8	39781444	0.023	387318	0.52	Colorectal cancer || id:ukb-saige-153	Colorectal cancer	Colorectal cancer || ||	TRUE	MedicineITLab	0.0370587	1732	5.21999e-09	IDO1	TRUE	reported	finn-pQTL-R10-v1-IDO1	2	TRUE	0.0194423	34.3021	195.968	34.4542
rs4808118	C	A	C	A	-0.582869	-0.039	0.237432	0.22	FALSE	FALSE	FALSE	ukb-saige-153	19	18288947	0.026	387318	0.13	Colorectal cancer || id:ukb-saige-153	Colorectal cancer	Colorectal cancer || ||	TRUE	MedicineITLab	0.0382983	1732	3.48658e-49	IFI30	TRUE	reported	finn-pQTL-R10-v1-IFI30	2	TRUE	0.123024	242.688	195.968	231.624
rs914142	A	G	A	G	-0.437183	-0.017	0.717333	0.73	FALSE	FALSE	FALSE	ukb-saige-153	21	34725807	0.024	387318	0.48	Colorectal cancer || id:ukb-saige-153	Colorectal cancer	Colorectal cancer || ||	TRUE	MedicineITLab	0.0363964	1732	5.55392e-32	IFNAR1	TRUE	reported	finn-pQTL-R10-v1-IFNAR1	2	TRUE	0.0775091	145.357	195.968	144.281
rs12441796	T	C	T	C	0.326944	-0.011	0.180349	0.16	FALSE	FALSE	FALSE	ukb-saige-153	15	65689742	0.029	387318	0.72	Colorectal cancer || id:ukb-saige-153	Colorectal cancer	Colorectal cancer || ||	TRUE	MedicineITLab	0.044015	1732	1.72266e-13	IGDCC4	TRUE	reported	finn-pQTL-R10-v1-IGDCC4	2	TRUE	0.0316024	56.4562	195.968	55.1754
rs72739454	T	C	T	C	0.349921	-0.015	0.115938	0.06	FALSE	FALSE	FALSE	ukb-saige-153	15	65728128	0.045	387318	0.74	Colorectal cancer || id:ukb-saige-153	Colorectal cancer	Colorectal cancer || ||	TRUE	MedicineITLab	0.0516626	1732	1.72068e-11	IGDCC4	TRUE	reported	finn-pQTL-R10-v1-IGDCC4	2	TRUE	0.0251003	44.5415	195.968	45.8762
rs3777399	A	G	A	G	0.464444	0.046	0.127283	0.13	FALSE	FALSE	FALSE	ukb-saige-153	6	160513793	0.032	387318	0.15	Colorectal cancer || id:ukb-saige-153	Colorectal cancer	Colorectal cancer || ||	TRUE	MedicineITLab	0.0488647	1732	6.43428e-21	IGF2R	TRUE	reported	finn-pQTL-R10-v1-IGF2R	2	TRUE	0.0479226	87.0792	195.968	90.3392
rs2854746	C	G	C	G	0.49743	0.039	0.356755	0.4	FALSE	TRUE	FALSE	ukb-saige-153	7	45960645	0.022	387318	0.074	Colorectal cancer || id:ukb-saige-153	Colorectal cancer	Colorectal cancer || ||	TRUE	MedicineITLab	0.0334473	1732	3.6033e-47	IGFBP3	TRUE	reported	finn-pQTL-R10-v1-IGFBP3	2	TRUE	0.113564	221.635	195.968	221.178
rs6957549	T	A	T	A	-0.424635	0.047	0.938192	0.97	FALSE	TRUE	FALSE	ukb-saige-153	7	45572603	0.064	387318	0.46	Colorectal cancer || id:ukb-saige-153	Colorectal cancer	Colorectal cancer || ||	TRUE	MedicineITLab	0.0705799	1732	2.1719e-09	IGFBP3	TRUE	reported	finn-pQTL-R10-v1-IGFBP3	2	TRUE	0.0209121	36.9507	195.968	36.1967
rs856589	A	G	A	G	0.236517	-0.018	0.281229	0.31	FALSE	FALSE	FALSE	ukb-saige-153	7	46734307	0.023	387318	0.44	Colorectal cancer || id:ukb-saige-153	Colorectal cancer	Colorectal cancer || ||	TRUE	MedicineITLab	0.0374814	1732	3.53029e-10	IGFBP3	TRUE	reported	finn-pQTL-R10-v1-IGFBP3	2	TRUE	0.0226155	40.03	195.968	39.8193
rs1718860	A	G	A	G	-0.386578	-0.021	0.685282	0.74	FALSE	FALSE	FALSE	ukb-saige-153	4	57949517	0.024	387318	0.39	Colorectal cancer || id:ukb-saige-153	Colorectal cancer	Colorectal cancer || ||	TRUE	MedicineITLab	0.0352065	1732	3.661e-27	IGFBP7	TRUE	reported	finn-pQTL-R10-v1-IGFBP7	2	TRUE	0.0644607	119.201	195.968	120.567
rs55788162	C	G	C	G	-0.289149	-0.014	0.200645	0.23	FALSE	TRUE	FALSE	ukb-saige-153	9	38381720	0.027	387318	0.59	Colorectal cancer || id:ukb-saige-153	Colorectal cancer	Colorectal cancer || ||	TRUE	MedicineITLab	0.0423821	1732	1.23367e-11	IGFBPL1	TRUE	reported	finn-pQTL-R10-v1-IGFBPL1	2	TRUE	0.0268189	47.6753	195.968	46.5456
rs7857243	A	G	A	G	0.529602	-0.019	0.7461	0.81	FALSE	FALSE	FALSE	ukb-saige-153	9	38409081	0.027	387318	0.48	Colorectal cancer || id:ukb-saige-153	Colorectal cancer	Colorectal cancer || ||	TRUE	MedicineITLab	0.0376877	1732	1.48252e-42	IGFBPL1	TRUE	reported	finn-pQTL-R10-v1-IGFBPL1	2	TRUE	0.106265	205.696	195.968	197.469
rs6669252	C	T	C	T	-0.325242	-0.018	0.911068	0.93	FALSE	FALSE	FALSE	ukb-saige-153	1	18355412	0.042	387318	0.68	Colorectal cancer || id:ukb-saige-153	Colorectal cancer	Colorectal cancer || ||	TRUE	MedicineITLab	0.0589194	1732	3.90158e-08	IGSF21	TRUE	reported	finn-pQTL-R10-v1-IGSF21	2	TRUE	0.0171416	30.1722	195.968	30.4717
rs765429	T	C	T	C	0.580039	0.029	0.473272	0.45	FALSE	FALSE	FALSE	ukb-saige-153	21	34660001	0.021	387318	0.17	Colorectal cancer || id:ukb-saige-153	Colorectal cancer	Colorectal cancer || ||	TRUE	MedicineITLab	0.0304821	1732	1.85823e-73	IL10RB	TRUE	reported	finn-pQTL-R10-v1-IL10RB	2	TRUE	0.167742	348.682	195.968	362.097
rs4921487	G	A	G	A	0.583256	0.0096	0.75753	0.68	FALSE	FALSE	FALSE	ukb-saige-153	5	158796325	0.023	387318	0.68	Colorectal cancer || id:ukb-saige-153	Colorectal cancer	Colorectal cancer || ||	TRUE	MedicineITLab	0.0367424	1732	4.42588e-53	IL12B	TRUE	reported	finn-pQTL-R10-v1-IL12B	2	TRUE	0.12497	247.075	195.968	251.99
rs2305739	A	G	A	G	-0.448317	0.02	0.205554	0.21	FALSE	FALSE	FALSE	ukb-saige-153	19	18180194	0.026	387318	0.44	Colorectal cancer || id:ukb-saige-153	Colorectal cancer	Colorectal cancer || ||	TRUE	MedicineITLab	0.0414682	1732	2.08449e-26	IL12RB1	TRUE	reported	finn-pQTL-R10-v1-IL12RB1	2	TRUE	0.0656433	121.541	195.968	116.88
rs2228059	G	T	G	T	-0.340163	0.013	0.455536	0.5	FALSE	FALSE	FALSE	ukb-saige-153	10	6002368	0.021	387318	0.54	Colorectal cancer || id:ukb-saige-153	Colorectal cancer	Colorectal cancer || ||	TRUE	MedicineITLab	0.0326581	1732	1.10713e-24	IL15RA	TRUE	reported	finn-pQTL-R10-v1-IL15RA	2	TRUE	0.0573979	105.345	195.968	108.491
rs7898286	T	G	T	G	-0.298469	0.026	0.341769	0.42	FALSE	FALSE	FALSE	ukb-saige-153	10	6009462	0.022	387318	0.24	Colorectal cancer || id:ukb-saige-153	Colorectal cancer	Colorectal cancer || ||	TRUE	MedicineITLab	0.0350312	1732	3.4135e-17	IL15RA	TRUE	reported	finn-pQTL-R10-v1-IL15RA	2	TRUE	0.0400811	72.2356	195.968	72.5919
rs4778639	G	T	G	T	-1.15246	0.033	0.0433365	0.092	FALSE	FALSE	FALSE	ukb-saige-153	15	81600451	0.037	387318	0.37	Colorectal cancer || id:ukb-saige-153	Colorectal cancer	Colorectal cancer || ||	TRUE	MedicineITLab	0.078307	1732	2.77971e-46	IL16	TRUE	reported	finn-pQTL-R10-v1-IL16	2	TRUE	0.110127	214.098	195.968	216.596
rs9509322	C	T	C	T	-0.457807	-0.0059	0.745673	0.77	FALSE	FALSE	FALSE	ukb-saige-153	13	21233538	0.025	387318	0.82	Colorectal cancer || id:ukb-saige-153	Colorectal cancer	Colorectal cancer || ||	TRUE	MedicineITLab	0.0382463	1732	8.84504e-32	IL17D	TRUE	reported	finn-pQTL-R10-v1-IL17D	2	TRUE	0.0794943	149.402	195.968	143.28
rs71570569	T	C	T	C	-0.409812	0.029	0.0692059	0.094	FALSE	FALSE	FALSE	ukb-saige-153	6	52105107	0.037	387318	0.43	Colorectal cancer || id:ukb-saige-153	Colorectal cancer	Colorectal cancer || ||	TRUE	MedicineITLab	0.0670462	1732	1.21024e-09	IL17F	TRUE	reported	finn-pQTL-R10-v1-IL17F	2	TRUE	0.021637	38.2598	195.968	37.3612
rs4819959	A	G	A	G	0.89358	0.007	0.464895	0.5	FALSE	FALSE	FALSE	ukb-saige-153	22	17586631	0.021	387318	0.74	Colorectal cancer || id:ukb-saige-153	Colorectal cancer	Colorectal cancer || ||	TRUE	MedicineITLab	0.0268042	1732	1.24165e-188	IL17RA	TRUE	reported	finn-pQTL-R10-v1-IL17RA	2	TRUE	0.397275	1140.3	195.968	1111.38
rs62236250	T	C	T	C	-0.413715	0.092	0.0608613	0.034	FALSE	FALSE	FALSE	ukb-saige-153	22	17548528	0.06	387318	0.12	Colorectal cancer || id:ukb-saige-153	Colorectal cancer	Colorectal cancer || ||	TRUE	MedicineITLab	0.0708491	1732	6.24453e-09	IL17RA	TRUE	reported	finn-pQTL-R10-v1-IL17RA	2	TRUE	0.0195661	34.5248	195.968	34.0984
rs62239193	T	C	T	C	-0.482838	0.096	0.0504982	0.032	FALSE	FALSE	FALSE	ukb-saige-153	22	17693934	0.062	387318	0.12	Colorectal cancer || id:ukb-saige-153	Colorectal cancer	Colorectal cancer || ||	TRUE	MedicineITLab	0.0788068	1732	1.10726e-09	IL17RA	TRUE	reported	finn-pQTL-R10-v1-IL17RA	2	TRUE	0.0223565	39.5613	195.968	37.5384
rs189011579	G	C	G	C	-0.966307	0.22	0.0694947	0.0095	FALSE	TRUE	FALSE	ukb-saige-153	3	53961749	0.12	387318	0.059	Colorectal cancer || id:ukb-saige-153	Colorectal cancer	Colorectal cancer || ||	TRUE	MedicineITLab	0.0639295	1732	1.41059e-48	IL17RB	TRUE	reported	finn-pQTL-R10-v1-IL17RB	2	TRUE	0.120762	237.613	195.968	228.469
rs6801605	G	A	G	A	-0.54734	0.013	0.638463	0.62	FALSE	FALSE	FALSE	ukb-saige-153	3	53876218	0.022	387318	0.56	Colorectal cancer || id:ukb-saige-153	Colorectal cancer	Colorectal cancer || ||	TRUE	MedicineITLab	0.0326018	1732	1.01391e-58	IL17RB	TRUE	reported	finn-pQTL-R10-v1-IL17RB	2	TRUE	0.138303	277.667	195.968	281.859
rs74663623	A	T	A	T	0.87951	0.094	0.0244838	0.026	FALSE	TRUE	FALSE	ukb-saige-153	3	54139364	0.067	387318	0.16	Colorectal cancer || id:ukb-saige-153	Colorectal cancer	Colorectal cancer || ||	TRUE	MedicineITLab	0.109695	1732	1.96336e-15	IL17RB	TRUE	reported	finn-pQTL-R10-v1-IL17RB	2	TRUE	0.0369509	66.3778	195.968	64.2847
rs1834481	G	C	G	C	-0.222183	0.036	0.246046	0.26	FALSE	TRUE	FALSE	ukb-saige-153	11	112023827	0.024	387318	0.14	Colorectal cancer || id:ukb-saige-153	Colorectal cancer	Colorectal cancer || ||	TRUE	MedicineITLab	0.039136	1732	1.60254e-08	IL18	TRUE	reported	finn-pQTL-R10-v1-IL18	2	TRUE	0.0183152	32.2765	195.968	32.2306
rs142549381	A	G	A	G	-0.40358	0.0013	0.11594	0.083	FALSE	FALSE	FALSE	ukb-saige-153	2	102700138	0.04	387318	0.97	Colorectal cancer || id:ukb-saige-153	Colorectal cancer	Colorectal cancer || ||	TRUE	MedicineITLab	0.0529131	1732	3.93459e-14	IL18R1	TRUE	reported	finn-pQTL-R10-v1-IL18R1	2	TRUE	0.0333891	59.7584	195.968	58.1745
rs2243191	C	T	C	T	0.390888	0.021	0.740801	0.78	FALSE	FALSE	FALSE	ukb-saige-153	1	207015957	0.026	387318	0.4	Colorectal cancer || id:ukb-saige-153	Colorectal cancer	Colorectal cancer || ||	TRUE	MedicineITLab	0.0383464	1732	9.77687e-24	IL19	TRUE	reported	finn-pQTL-R10-v1-IL19	2	TRUE	0.0586772	107.839	195.968	103.91
rs992153	T	C	T	C	0.188948	-0.015	0.446769	0.37	FALSE	FALSE	FALSE	ukb-saige-153	2	102710355	0.022	387318	0.5	Colorectal cancer || id:ukb-saige-153	Colorectal cancer	Colorectal cancer || ||	TRUE	MedicineITLab	0.0344183	1732	4.62147e-08	IL1R1	TRUE	reported	finn-pQTL-R10-v1-IL1R1	2	TRUE	0.0176484	31.0802	195.968	30.1374
rs10165454	A	G	A	G	0.528594	-0.022	0.0386745	0.057	FALSE	FALSE	FALSE	ukb-saige-153	2	102332273	0.046	387318	0.63	Colorectal cancer || id:ukb-saige-153	Colorectal cancer	Colorectal cancer || ||	TRUE	MedicineITLab	0.0893198	1732	3.92049e-09	IL1R2	TRUE	reported	finn-pQTL-R10-v1-IL1R2	2	TRUE	0.0207764	36.7057	195.968	35.0226
rs7561460	C	T	C	T	-0.605468	-0.037	0.543014	0.4	FALSE	FALSE	FALSE	ukb-saige-153	2	102617204	0.022	387318	0.094	Colorectal cancer || id:ukb-saige-153	Colorectal cancer	Colorectal cancer || ||	TRUE	MedicineITLab	0.0302398	1732	2.23409e-80	IL1R2	TRUE	reported	finn-pQTL-R10-v1-IL1R2	2	TRUE	0.181939	384.757	195.968	400.889
rs114057146	T	A	T	A	0.968968	-0.07	0.0165275	0.016	FALSE	TRUE	FALSE	ukb-saige-153	3	190504703	0.094	387318	0.45	Colorectal cancer || id:ukb-saige-153	Colorectal cancer	Colorectal cancer || ||	TRUE	MedicineITLab	0.138555	1732	3.82032e-12	IL1RAP	TRUE	reported	finn-pQTL-R10-v1-IL1RAP	2	TRUE	0.0305224	54.4661	195.968	48.9074
rs6444443	A	G	A	G	-1.39789	-0.021	0.846694	0.85	FALSE	FALSE	FALSE	ukb-saige-153	3	190346218	0.03	387318	0.47	Colorectal cancer || id:ukb-saige-153	Colorectal cancer	Colorectal cancer || ||	TRUE	MedicineITLab	0.0333232	1732	1e-200	IL1RAP	TRUE	reported	finn-pQTL-R10-v1-IL1RAP	2	TRUE	0.507296	1781.24	195.968	1759.76
rs12470864	A	G	A	G	-0.815696	0.0092	0.327097	0.39	FALSE	FALSE	FALSE	ukb-saige-153	2	102926362	0.022	387318	0.67	Colorectal cancer || id:ukb-saige-153	Colorectal cancer	Colorectal cancer || ||	TRUE	MedicineITLab	0.0307658	1732	2.86418e-130	IL1RL1	TRUE	reported	finn-pQTL-R10-v1-IL1RL1	2	TRUE	0.292898	716.604	195.968	702.943
rs186294975	G	A	G	A	-0.589057	0.0085	0.028145	0.02	FALSE	FALSE	FALSE	ukb-saige-153	2	102180371	0.077	387318	0.91	Colorectal cancer || id:ukb-saige-153	Colorectal cancer	Colorectal cancer || ||	TRUE	MedicineITLab	0.101824	1732	8.58618e-09	IL1RL1	TRUE	reported	finn-pQTL-R10-v1-IL1RL1	2	TRUE	0.0189822	33.4747	195.968	33.4668
rs60285282	A	T	A	T	-0.323825	0.042	0.161398	0.16	FALSE	TRUE	FALSE	ukb-saige-153	2	103277306	0.029	387318	0.15	Colorectal cancer || id:ukb-saige-153	Colorectal cancer	Colorectal cancer || ||	TRUE	MedicineITLab	0.045768	1732	2.15675e-12	IL1RL1	TRUE	reported	finn-pQTL-R10-v1-IL1RL1	2	TRUE	0.028386	50.5425	195.968	50.0607
rs111902533	A	G	A	G	0.1981	0.031	0.416532	0.41	FALSE	FALSE	FALSE	ukb-saige-153	2	103265902	0.022	387318	0.17	Colorectal cancer || id:ukb-saige-153	Colorectal cancer	Colorectal cancer || ||	TRUE	MedicineITLab	0.0342967	1732	9.04753e-09	IL1RL2	TRUE	reported	finn-pQTL-R10-v1-IL1RL2	2	TRUE	0.019075	33.6414	195.968	33.3629
rs12474258	T	C	T	C	-0.528383	-0.007	0.623442	0.62	FALSE	FALSE	FALSE	ukb-saige-153	2	102816695	0.022	387318	0.75	Colorectal cancer || id:ukb-saige-153	Colorectal cancer	Colorectal cancer || ||	TRUE	MedicineITLab	0.0327795	1732	1.43516e-54	IL1RL2	TRUE	reported	finn-pQTL-R10-v1-IL1RL2	2	TRUE	0.131086	260.991	195.968	259.832
rs78854132	A	G	A	G	-0.672387	-0.027	0.0743513	0.0055	FALSE	FALSE	FALSE	ukb-saige-153	2	102675239	0.15	387318	0.86	Colorectal cancer || id:ukb-saige-153	Colorectal cancer	Colorectal cancer || ||	TRUE	MedicineITLab	0.0627171	1732	5.21675e-26	IL1RL2	TRUE	reported	finn-pQTL-R10-v1-IL1RL2	2	TRUE	0.0622305	114.803	195.968	114.939
rs55709272	C	T	C	T	-0.27467	0.026	0.307061	0.44	FALSE	FALSE	FALSE	ukb-saige-153	2	113867288	0.022	387318	0.22	Colorectal cancer || id:ukb-saige-153	Colorectal cancer	Colorectal cancer || ||	TRUE	MedicineITLab	0.0357374	1732	2.53163e-14	IL1RN	TRUE	reported	finn-pQTL-R10-v1-IL1RN	2	TRUE	0.032105	57.3839	195.968	59.0713
rs361237	G	A	G	A	0.202809	0.011	0.416183	0.42	FALSE	FALSE	FALSE	ukb-saige-153	3	136702414	0.022	387318	0.61	Colorectal cancer || id:ukb-saige-153	Colorectal cancer	Colorectal cancer || ||	TRUE	MedicineITLab	0.0338556	1732	2.5405e-09	IL20RB	TRUE	reported	finn-pQTL-R10-v1-IL20RB	2	TRUE	0.0199878	35.2842	195.968	35.885
rs66733943	G	A	G	A	-0.371517	-0.0031	0.144226	0.17	FALSE	FALSE	FALSE	ukb-saige-153	1	24449419	0.029	387318	0.92	Colorectal cancer || id:ukb-saige-153	Colorectal cancer	Colorectal cancer || ||	TRUE	MedicineITLab	0.0474261	1732	8.20729e-15	IL22RA1	TRUE	reported	finn-pQTL-R10-v1-IL22RA1	2	TRUE	0.0340714	61.0227	195.968	61.3653
rs12722497	A	C	A	C	1.0124	-0.0085	0.0709041	0.088	FALSE	FALSE	FALSE	ukb-saige-153	10	6095928	0.038	387318	0.82	Colorectal cancer || id:ukb-saige-153	Colorectal cancer	Colorectal cancer || ||	TRUE	MedicineITLab	0.0622504	1732	1.87932e-55	IL2RA	TRUE	reported	finn-pQTL-R10-v1-IL2RA	2	TRUE	0.135041	270.095	195.968	264.497
rs584797	G	A	G	A	0.28911	0.0035	0.867962	0.82	FALSE	FALSE	FALSE	ukb-saige-153	10	6220496	0.028	387318	0.9	Colorectal cancer || id:ukb-saige-153	Colorectal cancer	Colorectal cancer || ||	TRUE	MedicineITLab	0.050554	1732	1.26099e-08	IL2RA	TRUE	reported	finn-pQTL-R10-v1-IL2RA	2	TRUE	0.0191583	33.7912	195.968	32.7051
rs161651	T	C	T	C	-0.685161	0.00029	0.295831	0.3	FALSE	FALSE	FALSE	ukb-saige-153	5	55205595	0.023	387318	0.99	Colorectal cancer || id:ukb-saige-153	Colorectal cancer	Colorectal cancer || ||	TRUE	MedicineITLab	0.033699	1732	1.40572e-82	IL31RA	TRUE	reported	finn-pQTL-R10-v1-IL31RA	2	TRUE	0.195585	420.632	195.968	413.382
rs45499297	C	T	C	T	-0.471787	-0.025	0.0439614	0.095	FALSE	FALSE	FALSE	ukb-saige-153	16	3115272	0.036	387318	0.5	Colorectal cancer || id:ukb-saige-153	Colorectal cancer	Colorectal cancer || ||	TRUE	MedicineITLab	0.0858714	1732	4.51097e-08	IL32	TRUE	reported	finn-pQTL-R10-v1-IL32	2	TRUE	0.0187098	32.9851	195.968	30.1853
rs4985556	A	C	A	C	-1.3187	4.4e-05	0.111143	0.12	FALSE	FALSE	FALSE	ukb-saige-153	16	70694000	0.033	387318	1	Colorectal cancer || id:ukb-saige-153	Colorectal cancer	Colorectal cancer || ||	TRUE	MedicineITLab	0.0440704	1732	6.71429e-159	IL34	TRUE	reported	finn-pQTL-R10-v1-IL34	2	TRUE	0.343586	905.534	195.968	895.361
rs6498011	G	A	G	A	0.283484	-0.0023	0.630643	0.61	FALSE	FALSE	FALSE	ukb-saige-153	16	27331894	0.022	387318	0.92	Colorectal cancer || id:ukb-saige-153	Colorectal cancer	Colorectal cancer || ||	TRUE	MedicineITLab	0.0344427	1732	3.62326e-16	IL4R	TRUE	reported	finn-pQTL-R10-v1-IL4R	2	TRUE	0.0374384	67.2875	195.968	67.7427
rs1695315	A	G	A	G	0.368363	-0.022	0.622876	0.6	FALSE	FALSE	FALSE	ukb-saige-153	3	3153339	0.022	387318	0.31	Colorectal cancer || id:ukb-saige-153	Colorectal cancer	Colorectal cancer || ||	TRUE	MedicineITLab	0.0334614	1732	2.73086e-27	IL5RA	TRUE	reported	finn-pQTL-R10-v1-IL5RA	2	TRUE	0.0637482	117.793	195.968	121.189
rs340828	A	G	A	G	0.198287	0.023	0.461321	0.42	FALSE	FALSE	FALSE	ukb-saige-153	3	3108083	0.022	387318	0.29	Colorectal cancer || id:ukb-saige-153	Colorectal cancer	Colorectal cancer || ||	TRUE	MedicineITLab	0.0342764	1732	8.59152e-09	IL5RA	TRUE	reported	finn-pQTL-R10-v1-IL5RA	2	TRUE	0.0195412	34.4801	195.968	33.4656
rs3792421	G	A	G	A	0.411128	-0.046	0.147843	0.24	FALSE	FALSE	FALSE	ukb-saige-153	3	3149791	0.025	387318	0.069	Colorectal cancer || id:ukb-saige-153	Colorectal cancer	Colorectal cancer || ||	TRUE	MedicineITLab	0.0470641	1732	5.61436e-18	IL5RA	TRUE	reported	finn-pQTL-R10-v1-IL5RA	2	TRUE	0.0425897	76.9578	195.968	76.3088
rs61812598	A	G	A	G	1.18925	0.0054	0.302095	0.41	FALSE	FALSE	FALSE	ukb-saige-153	1	154420087	0.022	387318	0.8	Colorectal cancer || id:ukb-saige-153	Colorectal cancer	Colorectal cancer || ||	TRUE	MedicineITLab	0.0236585	1732	1e-200	IL6R	TRUE	reported	finn-pQTL-R10-v1-IL6R	2	TRUE	0.596371	2556.11	195.968	2526.81
rs6897932	T	C	T	C	-0.94057	0.018	0.338626	0.27	FALSE	FALSE	FALSE	ukb-saige-153	5	35874575	0.024	387318	0.46	Colorectal cancer || id:ukb-saige-153	Colorectal cancer	Colorectal cancer || ||	TRUE	MedicineITLab	0.0284149	1732	1.49279e-186	IL7R	TRUE	reported	finn-pQTL-R10-v1-IL7R	2	TRUE	0.396259	1135.47	195.968	1095.7
rs79301179	T	C	T	C	-0.450948	-0.074	0.0492766	0.028	FALSE	FALSE	FALSE	ukb-saige-153	5	35241517	0.064	387318	0.25	Colorectal cancer || id:ukb-saige-153	Colorectal cancer	Colorectal cancer || ||	TRUE	MedicineITLab	0.0775375	1732	7.16952e-09	IL7R	TRUE	reported	finn-pQTL-R10-v1-IL7R	2	TRUE	0.0190536	33.603	195.968	33.8243
rs1058401	T	C	T	C	-0.284537	-0.021	0.406856	0.29	FALSE	FALSE	FALSE	ukb-saige-153	8	82570631	0.024	387318	0.37	Colorectal cancer || id:ukb-saige-153	Colorectal cancer	Colorectal cancer || ||	TRUE	MedicineITLab	0.0335755	1732	4.97393e-17	IMPA1	TRUE	reported	finn-pQTL-R10-v1-IMPA1	2	TRUE	0.0390758	70.3502	195.968	71.8179
rs17050272	A	G	A	G	0.405454	-0.025	0.52894	0.41	FALSE	FALSE	FALSE	ukb-saige-153	2	121306440	0.022	387318	0.24	Colorectal cancer || id:ukb-saige-153	Colorectal cancer	Colorectal cancer || ||	TRUE	MedicineITLab	0.0336325	1732	3.40565e-32	INHBB	TRUE	reported	finn-pQTL-R10-v1-INHBB	2	TRUE	0.0819211	154.37	195.968	145.333
rs2229357	A	G	A	G	-0.655966	0.058	0.232719	0.24	FALSE	FALSE	FALSE	ukb-saige-153	12	57843711	0.025	387318	0.019	Colorectal cancer || id:ukb-saige-153	Colorectal cancer	Colorectal cancer || ||	TRUE	MedicineITLab	0.0368	1732	2.208e-65	INHBC	TRUE	reported	finn-pQTL-R10-v1-INHBC	2	TRUE	0.153666	314.111	195.968	317.736
rs1057258	T	C	T	C	-0.276759	-0.041	0.134315	0.18	FALSE	FALSE	FALSE	ukb-saige-153	2	234115629	0.028	387318	0.14	Colorectal cancer || id:ukb-saige-153	Colorectal cancer	Colorectal cancer || ||	TRUE	MedicineITLab	0.049559	1732	2.71794e-08	INPP5D	TRUE	reported	finn-pQTL-R10-v1-INPP5D	2	TRUE	0.0178122	31.374	195.968	31.1859
rs41313766	T	C	T	C	-0.950897	0.12	0.0111307	0.017	FALSE	FALSE	FALSE	ukb-saige-153	9	5231360	0.085	387318	0.14	Colorectal cancer || id:ukb-saige-153	Colorectal cancer	Colorectal cancer || ||	TRUE	MedicineITLab	0.162384	1732	5.66631e-09	INSL4	TRUE	reported	finn-pQTL-R10-v1-INSL4	2	TRUE	0.0199048	35.1347	195.968	34.291
rs2306022	T	C	T	C	-0.474247	-0.035	0.092398	0.09	FALSE	FALSE	FALSE	ukb-saige-153	15	68628163	0.037	387318	0.34	Colorectal cancer || id:ukb-saige-153	Colorectal cancer	Colorectal cancer || ||	TRUE	MedicineITLab	0.0576414	1732	3.71364e-16	ITGA11	TRUE	reported	finn-pQTL-R10-v1-ITGA11	2	TRUE	0.0377222	67.8177	195.968	67.6924
rs114211799	C	A	C	A	-0.525682	0.19	0.0474732	0.019	FALSE	FALSE	FALSE	ukb-saige-153	5	52486979	0.081	387318	0.018	Colorectal cancer || id:ukb-saige-153	Colorectal cancer	Colorectal cancer || ||	TRUE	MedicineITLab	0.080068	1732	6.83912e-11	ITGA2	TRUE	reported	finn-pQTL-R10-v1-ITGA2	2	TRUE	0.0249921	44.3445	195.968	43.1051
rs33443	A	T	A	T	0.708855	0.0012	0.257755	0.28	FALSE	TRUE	FALSE	ukb-saige-153	5	52279233	0.024	387318	0.96	Colorectal cancer || id:ukb-saige-153	Colorectal cancer	Colorectal cancer || ||	TRUE	MedicineITLab	0.0358336	1732	1.10739e-78	ITGA2	TRUE	reported	finn-pQTL-R10-v1-ITGA2	2	TRUE	0.192265	411.79	195.968	391.322
rs11574631	T	C	T	C	0.1925	-0.03	0.606889	0.69	FALSE	FALSE	FALSE	ukb-saige-153	16	31363977	0.023	387318	0.2	Colorectal cancer || id:ukb-saige-153	Colorectal cancer	Colorectal cancer || ||	TRUE	MedicineITLab	0.0349081	1732	4.02643e-08	ITGAM	TRUE	reported	finn-pQTL-R10-v1-ITGAM	2	TRUE	0.0176814	31.1394	195.968	30.4095
rs3918323	C	T	C	T	-0.275472	-0.029	0.320346	0.36	FALSE	FALSE	FALSE	ukb-saige-153	13	102326047	0.022	387318	0.19	Colorectal cancer || id:ukb-saige-153	Colorectal cancer	Colorectal cancer || ||	TRUE	MedicineITLab	0.0358928	1732	2.74916e-14	ITGBL1	TRUE	reported	finn-pQTL-R10-v1-ITGBL1	2	TRUE	0.033044	59.1196	195.968	58.9034
rs7328708	G	A	G	A	-0.450737	-0.0082	0.866778	0.85	FALSE	FALSE	FALSE	ukb-saige-153	13	102107994	0.03	387318	0.78	Colorectal cancer || id:ukb-saige-153	Colorectal cancer	Colorectal cancer || ||	TRUE	MedicineITLab	0.0503134	1732	8.29851e-19	ITGBL1	TRUE	reported	finn-pQTL-R10-v1-ITGBL1	2	TRUE	0.0469202	85.1681	195.968	80.2563
rs678	T	A	T	A	-0.344673	0.012	0.372101	0.36	FALSE	TRUE	FALSE	ukb-saige-153	3	52820981	0.022	387318	0.6	Colorectal cancer || id:ukb-saige-153	Colorectal cancer	Colorectal cancer || ||	TRUE	MedicineITLab	0.0335924	1732	5.10035e-24	ITIH1	TRUE	reported	finn-pQTL-R10-v1-ITIH1	2	TRUE	0.0555131	101.682	195.968	105.277
rs2019065	C	T	C	T	0.307871	0.015	0.419892	0.38	FALSE	FALSE	FALSE	ukb-saige-153	3	52809525	0.022	387318	0.49	Colorectal cancer || id:ukb-saige-153	Colorectal cancer	Colorectal cancer || ||	TRUE	MedicineITLab	0.0330778	1732	3.83089e-20	ITIH3	TRUE	reported	finn-pQTL-R10-v1-ITIH3	2	TRUE	0.0461758	83.7513	195.968	86.6292
rs114318622	T	C	T	C	-1.77901	-0.078	0.0163565	0.0097	FALSE	FALSE	FALSE	ukb-saige-153	3	52225733	0.11	387318	0.48	Colorectal cancer || id:ukb-saige-153	Colorectal cancer	Colorectal cancer || ||	TRUE	MedicineITLab	0.128904	1732	3.51075e-41	ITIH4	TRUE	reported	finn-pQTL-R10-v1-ITIH4	2	TRUE	0.101839	196.158	195.968	190.469
rs76286811	T	G	T	G	-0.44605	-0.057	0.0613073	0.048	FALSE	FALSE	FALSE	ukb-saige-153	3	53463515	0.05	387318	0.26	Colorectal cancer || id:ukb-saige-153	Colorectal cancer	Colorectal cancer || ||	TRUE	MedicineITLab	0.0699583	1732	2.32702e-10	ITIH4	TRUE	reported	finn-pQTL-R10-v1-ITIH4	2	TRUE	0.0228999	40.5452	195.968	40.6526
rs11697186	T	A	T	A	-1.43237	-0.005	0.0591835	0.075	FALSE	TRUE	FALSE	ukb-saige-153	20	3185123	0.041	387318	0.9	Colorectal cancer || id:ukb-saige-153	Colorectal cancer	Colorectal cancer || ||	TRUE	MedicineITLab	0.0632823	1732	1.43847e-99	ITPA	TRUE	reported	finn-pQTL-R10-v1-ITPA	2	TRUE	0.228479	512.323	195.968	512.325
rs6515817	A	G	A	G	-0.595528	0.07	0.030211	0.054	FALSE	FALSE	FALSE	ukb-saige-153	20	3428751	0.049	387318	0.15	Colorectal cancer || id:ukb-saige-153	Colorectal cancer	Colorectal cancer || ||	TRUE	MedicineITLab	0.09602	1732	6.95216e-10	ITPA	TRUE	reported	finn-pQTL-R10-v1-ITPA	2	TRUE	0.0207815	36.715	195.968	38.4663
rs144420139	T	G	T	G	-1.0451	0.15	0.0254641	0.007	FALSE	FALSE	FALSE	ukb-saige-153	10	102608048	0.13	387318	0.27	Colorectal cancer || id:ukb-saige-153	Colorectal cancer	Colorectal cancer || ||	TRUE	MedicineITLab	0.107726	1732	1.04954e-21	KAZALD1	TRUE	reported	finn-pQTL-R10-v1-KAZALD1	2	TRUE	0.0542091	99.1569	195.968	94.1184
rs192577165	T	C	T	C	-1.20316	-0.46	0.0394354	0.002	FALSE	FALSE	FALSE	ukb-saige-153	10	102566096	0.28	387318	0.1	Colorectal cancer || id:ukb-saige-153	Colorectal cancer	Colorectal cancer || ||	TRUE	MedicineITLab	0.084153	1732	6.51028e-44	KAZALD1	TRUE	reported	finn-pQTL-R10-v1-KAZALD1	2	TRUE	0.10967	213.101	195.968	204.413
rs80328765	A	G	A	G	-0.63371	-0.12	0.036561	0.0073	FALSE	FALSE	FALSE	ukb-saige-153	10	102568066	0.13	387318	0.33	Colorectal cancer || id:ukb-saige-153	Colorectal cancer	Colorectal cancer || ||	TRUE	MedicineITLab	0.090476	1732	3.54405e-12	KAZALD1	TRUE	reported	finn-pQTL-R10-v1-KAZALD1	2	TRUE	0.0282913	50.369	195.968	49.0585
rs34231037	G	A	G	A	-1.34879	-0.04	0.0349873	0.034	FALSE	FALSE	FALSE	ukb-saige-153	4	55972946	0.059	387318	0.51	Colorectal cancer || id:ukb-saige-153	Colorectal cancer	Colorectal cancer || ||	TRUE	MedicineITLab	0.0860741	1732	7.47137e-52	KDR	TRUE	reported	finn-pQTL-R10-v1-KDR	2	TRUE	0.122846	242.288	195.968	245.552
rs8176058	A	G	A	G	0.960393	0.099	0.0133202	0.042	FALSE	FALSE	FALSE	ukb-saige-153	7	142655008	0.053	387318	0.064	Colorectal cancer || id:ukb-saige-153	Colorectal cancer	Colorectal cancer || ||	TRUE	MedicineITLab	0.147667	1732	1.02233e-10	KEL	TRUE	reported	finn-pQTL-R10-v1-KEL	2	TRUE	0.0242446	42.9853	195.968	42.2991
rs8176059	A	G	A	G	-1.48931	0.079	0.00779446	0.011	FALSE	FALSE	FALSE	ukb-saige-153	7	142651354	0.1	387318	0.43	Colorectal cancer || id:ukb-saige-153	Colorectal cancer	Colorectal cancer || ||	TRUE	MedicineITLab	0.190674	1732	9.78138e-15	KEL	TRUE	reported	finn-pQTL-R10-v1-KEL	2	TRUE	0.0343074	61.4604	195.968	61.0081
rs2304681	A	G	A	G	-0.32098	-0.045	0.347267	0.37	FALSE	FALSE	FALSE	ukb-saige-153	2	27315252	0.022	387318	0.043	Colorectal cancer || id:ukb-saige-153	Colorectal cancer	Colorectal cancer || ||	TRUE	MedicineITLab	0.0348842	1732	9.87643e-20	KHK	TRUE	reported	finn-pQTL-R10-v1-KHK	2	TRUE	0.0467073	84.7627	195.968	84.6639
rs9467244	A	G	A	G	0.351693	-0.011	0.506931	0.6	FALSE	FALSE	FALSE	ukb-saige-153	6	24640011	0.022	387318	0.61	Colorectal cancer || id:ukb-saige-153	Colorectal cancer	Colorectal cancer || ||	TRUE	MedicineITLab	0.0337772	1732	1.14895e-24	KIAA0319	TRUE	reported	finn-pQTL-R10-v1-KIAA0319	2	TRUE	0.0618321	114.02	195.968	108.413
rs192226185	A	C	A	C	-0.65193	-0.18	0.0398215	0.01	FALSE	FALSE	FALSE	ukb-saige-153	19	55421217	0.15	387318	0.21	Colorectal cancer || id:ukb-saige-153	Colorectal cancer	Colorectal cancer || ||	TRUE	MedicineITLab	0.090075	1732	6.83439e-13	KIR2DL3	TRUE	reported	finn-pQTL-R10-v1-KIR2DL3	2	TRUE	0.0325014	58.1162	195.968	52.3834
rs150089918	A	G	A	G	-0.58831	-0.087	0.0495857	0.02	FALSE	FALSE	FALSE	ukb-saige-153	19	55391834	0.079	387318	0.27	Colorectal cancer || id:ukb-saige-153	Colorectal cancer	Colorectal cancer || ||	TRUE	MedicineITLab	0.0769395	1732	3.40643e-14	KIR3DL1	TRUE	reported	finn-pQTL-R10-v1-KIR3DL1	2	TRUE	0.0326221	58.3394	195.968	58.4674
rs680891	T	C	T	C	-0.667674	-0.0089	0.253609	0.21	FALSE	FALSE	FALSE	ukb-saige-153	19	55333023	0.027	387318	0.74	Colorectal cancer || id:ukb-saige-153	Colorectal cancer	Colorectal cancer || ||	TRUE	MedicineITLab	0.0383594	1732	1.18386e-62	KIR3DL1	TRUE	reported	finn-pQTL-R10-v1-KIR3DL1	2	TRUE	0.168768	351.248	195.968	302.96
rs56971278	A	G	A	G	-0.669052	0.018	0.0409716	0.033	FALSE	FALSE	FALSE	ukb-saige-153	19	36328468	0.062	387318	0.77	Colorectal cancer || id:ukb-saige-153	Colorectal cancer	Colorectal cancer || ||	TRUE	MedicineITLab	0.08609	1732	1.32008e-14	KIRREL2	TRUE	reported	finn-pQTL-R10-v1-KIRREL2	2	TRUE	0.0351774	63.0758	195.968	60.3969
rs10517522	G	A	G	A	-0.772378	0.0012	0.39323	0.33	FALSE	FALSE	FALSE	ukb-saige-153	4	39453790	0.023	387318	0.96	Colorectal cancer || id:ukb-saige-153	Colorectal cancer	Colorectal cancer || ||	TRUE	MedicineITLab	0.0293152	1732	6.53131e-129	KLB	TRUE	reported	finn-pQTL-R10-v1-KLB	2	TRUE	0.284682	688.506	195.968	694.183
rs2381489	G	C	G	C	-0.200795	0.0077	0.335313	0.32	FALSE	TRUE	FALSE	ukb-saige-153	4	40190100	0.023	387318	0.74	Colorectal cancer || id:ukb-saige-153	Colorectal cancer	Colorectal cancer || ||	TRUE	MedicineITLab	0.0358108	1732	2.39045e-08	KLB	TRUE	reported	finn-pQTL-R10-v1-KLB	2	TRUE	0.0179723	31.6611	195.968	31.4397
rs2608816	C	T	C	T	0.576108	0.0096	0.0926924	0.093	FALSE	FALSE	FALSE	ukb-saige-153	4	39426809	0.038	387318	0.8	Colorectal cancer || id:ukb-saige-153	Colorectal cancer	Colorectal cancer || ||	TRUE	MedicineITLab	0.0571572	1732	2.94713e-23	KLB	TRUE	reported	finn-pQTL-R10-v1-KLB	2	TRUE	0.055826	102.289	195.968	101.593
rs2659058	T	C	T	C	-0.338828	-0.012	0.702163	0.68	FALSE	FALSE	FALSE	ukb-saige-153	19	51326106	0.023	387318	0.6	Colorectal cancer || id:ukb-saige-153	Colorectal cancer	Colorectal cancer || ||	TRUE	MedicineITLab	0.036727	1732	7.95976e-20	KLK1	TRUE	reported	finn-pQTL-R10-v1-KLK1	2	TRUE	0.0480181	87.2615	195.968	85.1114
rs2569454	C	T	C	T	0.699449	-0.02	0.565082	0.58	FALSE	FALSE	FALSE	ukb-saige-153	19	51523203	0.022	387318	0.37	Colorectal cancer || id:ukb-saige-153	Colorectal cancer	Colorectal cancer || ||	TRUE	MedicineITLab	0.0308475	1732	7.17629e-100	KLK10	TRUE	reported	finn-pQTL-R10-v1-KLK10	2	TRUE	0.24047	547.724	195.968	514.129
rs74598956	A	T	A	T	0.48176	-0.0087	0.0635467	0.061	FALSE	TRUE	FALSE	ukb-saige-153	19	51473245	0.045	387318	0.85	Colorectal cancer || id:ukb-saige-153	Colorectal cancer	Colorectal cancer || ||	TRUE	MedicineITLab	0.0690314	1732	4.22377e-12	KLK10	TRUE	reported	finn-pQTL-R10-v1-KLK10	2	TRUE	0.027623	49.1453	195.968	48.7044
rs117268623	T	C	T	C	-1.27206	-0.025	0.0272495	0.032	FALSE	FALSE	FALSE	ukb-saige-153	19	51527970	0.062	387318	0.68	Colorectal cancer || id:ukb-saige-153	Colorectal cancer	Colorectal cancer || ||	TRUE	MedicineITLab	0.0991657	1732	4.7698e-36	KLK11	TRUE	reported	finn-pQTL-R10-v1-KLK11	2	TRUE	0.0857838	162.331	195.968	164.548
rs10408037	G	A	G	A	0.385419	-0.011	0.0759011	0.084	FALSE	FALSE	FALSE	ukb-saige-153	19	51441783	0.039	387318	0.78	Colorectal cancer || id:ukb-saige-153	Colorectal cancer	Colorectal cancer || ||	TRUE	MedicineITLab	0.0644498	1732	2.70259e-09	KLK12	TRUE	reported	finn-pQTL-R10-v1-KLK12	2	TRUE	0.0208383	36.8175	195.968	35.7621
rs3745540	G	A	G	A	-1.14839	-0.002	0.537529	0.58	FALSE	FALSE	FALSE	ukb-saige-153	19	51535130	0.022	387318	0.93	Colorectal cancer || id:ukb-saige-153	Colorectal cancer	Colorectal cancer || ||	TRUE	MedicineITLab	0.0202185	1732	1e-200	KLK12	TRUE	reported	finn-pQTL-R10-v1-KLK12	2	TRUE	0.655685	3294.47	195.968	3226.12
rs2569459	T	C	T	C	-0.550874	-0.018	0.346557	0.35	FALSE	FALSE	FALSE	ukb-saige-153	19	51539433	0.022	387318	0.43	Colorectal cancer || id:ukb-saige-153	Colorectal cancer	Colorectal cancer || ||	TRUE	MedicineITLab	0.0339895	1732	4.15719e-55	KLK13	TRUE	reported	finn-pQTL-R10-v1-KLK13	2	TRUE	0.137441	275.66	195.968	262.673
rs2569491	A	G	A	G	0.381504	-0.023	0.244061	0.3	FALSE	FALSE	FALSE	ukb-saige-153	19	51584916	0.023	387318	0.32	Colorectal cancer || id:ukb-saige-153	Colorectal cancer	Colorectal cancer || ||	TRUE	MedicineITLab	0.0382809	1732	8.72168e-23	KLK14	TRUE	reported	finn-pQTL-R10-v1-KLK14	2	TRUE	0.0537048	98.1822	195.968	99.3194
rs181031500	G	A	G	A	0.821584	-0.026	0.0251042	0.027	FALSE	FALSE	FALSE	ukb-saige-153	19	51246329	0.067	387318	0.69	Colorectal cancer || id:ukb-saige-153	Colorectal cancer	Colorectal cancer || ||	TRUE	MedicineITLab	0.107722	1732	3.94457e-14	KLK15	TRUE	reported	finn-pQTL-R10-v1-KLK15	2	TRUE	0.0330399	59.1121	195.968	58.1695
rs3212852	T	C	T	C	-1.40894	-0.046	0.0484355	0.02	FALSE	FALSE	FALSE	ukb-saige-153	19	51330129	0.08	387318	0.56	Colorectal cancer || id:ukb-saige-153	Colorectal cancer	Colorectal cancer || ||	TRUE	MedicineITLab	0.0728515	1732	1.33814e-75	KLK15	TRUE	reported	finn-pQTL-R10-v1-KLK15	2	TRUE	0.182986	387.466	195.968	374.031
rs62114340	G	A	G	A	0.754641	-0.022	0.0263008	0.036	FALSE	FALSE	FALSE	ukb-saige-153	19	51296643	0.057	387318	0.7	Colorectal cancer || id:ukb-saige-153	Colorectal cancer	Colorectal cancer || ||	TRUE	MedicineITLab	0.104986	1732	9.73868e-13	KLK15	TRUE	reported	finn-pQTL-R10-v1-KLK15	2	TRUE	0.0291679	51.9764	195.968	51.6676
rs73048483	A	G	A	G	1.45217	-0.0034	0.0805291	0.074	FALSE	FALSE	FALSE	ukb-saige-153	19	51340543	0.041	387318	0.93	Colorectal cancer || id:ukb-saige-153	Colorectal cancer	Colorectal cancer || ||	TRUE	MedicineITLab	0.0524406	1732	5.09331e-140	KLK15	TRUE	reported	finn-pQTL-R10-v1-KLK15	2	TRUE	0.312288	785.589	195.968	766.831
rs2664153	A	G	A	G	-0.407759	-0.015	0.667469	0.64	FALSE	FALSE	FALSE	ukb-saige-153	19	51415252	0.023	387318	0.5	Colorectal cancer || id:ukb-saige-153	Colorectal cancer	Colorectal cancer || ||	TRUE	MedicineITLab	0.0350324	1732	3.35429e-30	KLK4	TRUE	reported	finn-pQTL-R10-v1-KLK4	2	TRUE	0.0738075	137.862	195.968	135.478
rs73046570	T	C	T	C	0.463263	0.052	0.0651746	0.088	FALSE	FALSE	FALSE	ukb-saige-153	19	51293067	0.038	387318	0.17	Colorectal cancer || id:ukb-saige-153	Colorectal cancer	Colorectal cancer || ||	TRUE	MedicineITLab	0.0687863	1732	2.2269e-11	KLK4	TRUE	reported	finn-pQTL-R10-v1-KLK4	2	TRUE	0.0261513	46.4567	195.968	45.3577
rs268891	C	A	C	A	-0.201934	-0.018	0.632033	0.65	FALSE	FALSE	FALSE	ukb-saige-153	19	51471983	0.022	387318	0.42	Colorectal cancer || id:ukb-saige-153	Colorectal cancer	Colorectal cancer || ||	TRUE	MedicineITLab	0.0354777	1732	1.47316e-08	KLK6	TRUE	reported	finn-pQTL-R10-v1-KLK6	2	TRUE	0.018967	33.4472	195.968	32.3972
rs1654523	T	C	T	C	0.710989	0.041	0.894368	0.91	FALSE	FALSE	FALSE	ukb-saige-153	19	51485194	0.037	387318	0.27	Colorectal cancer || id:ukb-saige-153	Colorectal cancer	Colorectal cancer || ||	TRUE	MedicineITLab	0.0532552	1732	9.07612e-39	KLK7	TRUE	reported	finn-pQTL-R10-v1-KLK7	2	TRUE	0.0955141	182.689	195.968	178.239
rs74705037	A	G	A	G	1.32479	-0.011	0.0142735	0.044	FALSE	FALSE	FALSE	ukb-saige-153	19	51504808	0.052	387318	0.83	Colorectal cancer || id:ukb-saige-153	Colorectal cancer	Colorectal cancer || ||	TRUE	MedicineITLab	0.14308	1732	5.90473e-20	KLK8	TRUE	reported	finn-pQTL-R10-v1-KLK8	2	TRUE	0.0493868	89.878	195.968	85.7307
rs4241822	C	T	C	T	0.416134	-0.00017	0.45274	0.41	FALSE	FALSE	FALSE	ukb-saige-153	4	187178300	0.022	387318	0.99	Colorectal cancer || id:ukb-saige-153	Colorectal cancer	Colorectal cancer || ||	TRUE	MedicineITLab	0.0321071	1732	9.86279e-37	KLKB1	TRUE	reported	finn-pQTL-R10-v1-KLKB1	2	TRUE	0.0858102	162.386	195.968	167.983
rs58867185	T	C	T	C	-0.437791	-0.021	0.0955996	0.076	FALSE	FALSE	FALSE	ukb-saige-153	4	187182384	0.04	387318	0.61	Colorectal cancer || id:ukb-saige-153	Colorectal cancer	Colorectal cancer || ||	TRUE	MedicineITLab	0.0559096	1732	8.41589e-15	KLKB1	TRUE	reported	finn-pQTL-R10-v1-KLKB1	2	TRUE	0.0331421	59.3013	195.968	61.3142
rs10845106	G	T	G	T	-0.514249	-0.014	0.657618	0.67	FALSE	FALSE	FALSE	ukb-saige-153	12	10472338	0.023	387318	0.53	Colorectal cancer || id:ukb-saige-153	Colorectal cancer	Colorectal cancer || ||	TRUE	MedicineITLab	0.0327159	1732	3.82472e-52	KLRD1	TRUE	reported	finn-pQTL-R10-v1-KLRD1	2	TRUE	0.119086	233.87	195.968	247.075
rs1597097	C	T	C	T	0.195283	0.026	0.45652	0.43	FALSE	FALSE	FALSE	ukb-saige-153	12	10020267	0.022	387318	0.24	Colorectal cancer || id:ukb-saige-153	Colorectal cancer	Colorectal cancer || ||	TRUE	MedicineITLab	0.0340183	1732	1.11232e-08	KLRD1	TRUE	reported	finn-pQTL-R10-v1-KLRD1	2	TRUE	0.0189235	33.3692	195.968	32.9537
rs56116724	C	T	C	T	-0.452112	-0.022	0.0461588	0.083	FALSE	FALSE	FALSE	ukb-saige-153	12	10000247	0.039	387318	0.57	Colorectal cancer || id:ukb-saige-153	Colorectal cancer	Colorectal cancer || ||	TRUE	MedicineITLab	0.0793964	1732	1.45201e-08	KLRF1	TRUE	reported	finn-pQTL-R10-v1-KLRF1	2	TRUE	0.0179992	31.7093	195.968	32.4258
rs7965744	A	C	A	C	-0.583793	-0.0034	0.778001	0.79	FALSE	FALSE	FALSE	ukb-saige-153	12	10520179	0.026	387318	0.9	Colorectal cancer || id:ukb-saige-153	Colorectal cancer	Colorectal cancer || ||	TRUE	MedicineITLab	0.0396909	1732	3.11745e-46	KLRK1	TRUE	reported	finn-pQTL-R10-v1-KLRK1	2	TRUE	0.117728	230.846	195.968	216.34
rs2805099	C	A	C	A	-0.220314	-0.019	0.762991	0.72	FALSE	FALSE	FALSE	ukb-saige-153	9	131614082	0.024	387318	0.43	Colorectal cancer || id:ukb-saige-153	Colorectal cancer	Colorectal cancer || ||	TRUE	MedicineITLab	0.0397354	1732	3.40298e-08	KYAT1	TRUE	reported	finn-pQTL-R10-v1-KYAT1	2	TRUE	0.0175549	30.9127	195.968	30.7418
rs1050950	A	C	A	C	0.220837	-0.012	0.23506	0.22	FALSE	FALSE	FALSE	ukb-saige-153	2	143746849	0.026	387318	0.65	Colorectal cancer || id:ukb-saige-153	Colorectal cancer	Colorectal cancer || ||	TRUE	MedicineITLab	0.0394995	1732	2.62029e-08	KYNU	TRUE	reported	finn-pQTL-R10-v1-KYNU	2	TRUE	0.017538	30.8823	195.968	31.2579
rs13251292	G	A	G	A	0.1981	0.034	0.4195	0.41	FALSE	FALSE	FALSE	ukb-saige-153	8	71474355	0.022	387318	0.12	Colorectal cancer || id:ukb-saige-153	Colorectal cancer	Colorectal cancer || ||	TRUE	MedicineITLab	0.03409	1732	7.37242e-09	LACTB2	TRUE	reported	finn-pQTL-R10-v1-LACTB2	2	TRUE	0.0191132	33.7101	195.968	33.7687
rs3782735	A	G	A	G	0.21941	-0.025	0.560561	0.6	FALSE	FALSE	FALSE	ukb-saige-153	12	6885076	0.022	387318	0.26	Colorectal cancer || id:ukb-saige-153	Colorectal cancer	Colorectal cancer || ||	TRUE	MedicineITLab	0.0344351	1732	2.39073e-10	LAG3	TRUE	reported	finn-pQTL-R10-v1-LAG3	2	TRUE	0.0237172	42.0276	195.968	40.5985
rs10426462	C	T	C	T	-0.284307	0.013	0.386836	0.41	FALSE	FALSE	FALSE	ukb-saige-153	19	54851922	0.022	387318	0.53	Colorectal cancer || id:ukb-saige-153	Colorectal cancer	Colorectal cancer || ||	TRUE	MedicineITLab	0.0344441	1732	2.99778e-16	LAIR1	TRUE	reported	finn-pQTL-R10-v1-LAIR1	2	TRUE	0.038345	68.9819	195.968	68.1311
rs73070113	T	A	T	A	-1.10879	0.0072	0.0932607	0.13	FALSE	TRUE	FALSE	ukb-saige-153	19	55014172	0.033	387318	0.83	Colorectal cancer || id:ukb-saige-153	Colorectal cancer	Colorectal cancer || ||	TRUE	MedicineITLab	0.0531351	1732	1.95299e-86	LAIR2	TRUE	reported	finn-pQTL-R10-v1-LAIR2	2	TRUE	0.207926	454.141	195.968	435.447
rs79111643	A	G	A	G	0.84237	0.048	0.0432494	0.029	FALSE	FALSE	FALSE	ukb-saige-153	19	55195741	0.064	387318	0.45	Colorectal cancer || id:ukb-saige-153	Colorectal cancer	Colorectal cancer || ||	TRUE	MedicineITLab	0.0801822	1732	4.54046e-25	LAIR2	TRUE	reported	finn-pQTL-R10-v1-LAIR2	2	TRUE	0.0587239	107.93	195.968	110.37
rs8106823	G	A	G	A	-0.489659	-0.48	0.918452		FALSE	FALSE	FALSE	ukb-saige-153	19	54875120	0.57	387318	0.4	Colorectal cancer || id:ukb-saige-153	Colorectal cancer	Colorectal cancer || ||	TRUE	MedicineITLab	0.0611532	1732	2.1355e-15	LAIR2	TRUE	reported	finn-pQTL-R10-v1-LAIR2	2	TRUE	0.0359159	64.4493	195.968	64.1134
rs8112812	C	G	C	G	-0.222579	-0.044	0.248614	0.28	FALSE	TRUE	FALSE	ukb-saige-153	19	54901773	0.024	387318	0.061	Colorectal cancer || id:ukb-saige-153	Colorectal cancer	Colorectal cancer || ||	TRUE	MedicineITLab	0.0389522	1732	1.29563e-08	LAIR2	TRUE	reported	finn-pQTL-R10-v1-LAIR2	2	TRUE	0.0185092	32.6247	195.968	32.6516
rs111280610	T	C	T	C	-0.783204	-0.37	0.0156501	0.0063	FALSE	FALSE	FALSE	ukb-saige-153	7	108394948	0.14	387318	0.0064	Colorectal cancer || id:ukb-saige-153	Colorectal cancer	Colorectal cancer || ||	TRUE	MedicineITLab	0.135426	1732	8.67721e-09	LAMB1	TRUE	reported	finn-pQTL-R10-v1-LAMB1	2	TRUE	0.0188993	33.3257	195.968	33.4461
rs4859275	T	A	T	A	0.287975	-0.03	0.668865	0.65	FALSE	TRUE	FALSE	ukb-saige-153	3	182814131	0.022	387318	0.19	Colorectal cancer || id:ukb-saige-153	Colorectal cancer	Colorectal cancer || ||	TRUE	MedicineITLab	0.0347846	1732	2.45754e-16	LAMP3	TRUE	reported	finn-pQTL-R10-v1-LAMP3	2	TRUE	0.0367353	65.9756	195.968	68.5387
rs141702374	G	T	G	T	1.0799	-0.081	0.0415591	0.0074	FALSE	FALSE	FALSE	ukb-saige-153	11	111509601	0.13	387318	0.54	Colorectal cancer || id:ukb-saige-153	Colorectal cancer	Colorectal cancer || ||	TRUE	MedicineITLab	0.0827168	1732	3.19595e-37	LAYN	TRUE	reported	finn-pQTL-R10-v1-LAYN	2	TRUE	0.0929027	177.182	195.968	170.443
rs1876197	G	A	G	A	-0.193543	0.0083	0.441984	0.54	FALSE	FALSE	FALSE	ukb-saige-153	11	110707998	0.021	387318	0.7	Colorectal cancer || id:ukb-saige-153	Colorectal cancer	Colorectal cancer || ||	TRUE	MedicineITLab	0.0345092	1732	2.37225e-08	LAYN	TRUE	reported	finn-pQTL-R10-v1-LAYN	2	TRUE	0.0184773	32.5675	195.968	31.4547
rs610747	G	A	G	A	-0.239762	-0.026	0.634581	0.63	FALSE	FALSE	FALSE	ukb-saige-153	11	111764934	0.022	387318	0.24	Colorectal cancer || id:ukb-saige-153	Colorectal cancer	Colorectal cancer || ||	TRUE	MedicineITLab	0.0353108	1732	1.53568e-11	LAYN	TRUE	reported	finn-pQTL-R10-v1-LAYN	2	TRUE	0.0266605	47.3861	195.968	46.1047
rs115294862	C	T	C	T	-0.797726	0.061	0.0228626	0.015	FALSE	FALSE	FALSE	ukb-saige-153	20	37703306	0.09	387318	0.5	Colorectal cancer || id:ukb-saige-153	Colorectal cancer	Colorectal cancer || ||	TRUE	MedicineITLab	0.114308	1732	4.22669e-12	LBP	TRUE	reported	finn-pQTL-R10-v1-LBP	2	TRUE	0.0284327	50.6281	195.968	48.7028
rs2232613	T	C	T	C	-1.20068	0.017	0.126155	0.082	FALSE	FALSE	FALSE	ukb-saige-153	20	36997655	0.039	387318	0.65	Colorectal cancer || id:ukb-saige-153	Colorectal cancer	Colorectal cancer || ||	TRUE	MedicineITLab	0.0421179	1732	7.29458e-147	LBP	TRUE	reported	finn-pQTL-R10-v1-LBP	2	TRUE	0.317851	806.102	195.968	812.683
rs2864142	T	C	T	C	-0.443957	0.0096	0.940163	0.973	FALSE	FALSE	FALSE	ukb-saige-153	20	36982328	0.067	387318	0.89	Colorectal cancer || id:ukb-saige-153	Colorectal cancer	Colorectal cancer || ||	TRUE	MedicineITLab	0.0719163	1732	8.31649e-10	LBP	TRUE	reported	finn-pQTL-R10-v1-LBP	2	TRUE	0.0221761	39.2347	195.968	38.109
rs148753499	T	A	T	A	-0.464333	-0.018	0.0867964	0.11	FALSE	TRUE	FALSE	ukb-saige-153	16	68007575	0.035	387318	0.61	Colorectal cancer || id:ukb-saige-153	Colorectal cancer	Colorectal cancer || ||	TRUE	MedicineITLab	0.0604814	1732	2.6996e-14	LCAT	TRUE	reported	finn-pQTL-R10-v1-LCAT	2	TRUE	0.0341789	61.222	195.968	58.9407
rs80180406	A	G	A	G	-1.11607	-0.1	0.0208011	0.022	FALSE	FALSE	FALSE	ukb-saige-153	16	67435558	0.072	387318	0.15	Colorectal cancer || id:ukb-saige-153	Colorectal cancer	Colorectal cancer || ||	TRUE	MedicineITLab	0.115626	1732	1.65463e-21	LCAT	TRUE	reported	finn-pQTL-R10-v1-LCAT	2	TRUE	0.0507423	92.4766	195.968	93.1691
rs2297723	C	A	C	A	0.673728	-0.035	0.702871	0.78	FALSE	FALSE	FALSE	ukb-saige-153	9	139656706	0.026	387318	0.17	Colorectal cancer || id:ukb-saige-153	Colorectal cancer	Colorectal cancer || ||	TRUE	MedicineITLab	0.0334157	1732	2.27877e-81	LCN15	TRUE	reported	finn-pQTL-R10-v1-LCN15	2	TRUE	0.189592	404.727	195.968	406.507
rs7324845	A	G	A	G	-1.47964	-0.0091	0.926552	0.9	FALSE	FALSE	FALSE	ukb-saige-153	13	46703142	0.036	387318	0.8	Colorectal cancer || id:ukb-saige-153	Colorectal cancer	Colorectal cancer || ||	TRUE	MedicineITLab	0.0546	1732	4.22669e-135	LCP1	TRUE	reported	finn-pQTL-R10-v1-LCP1	2	TRUE	0.297983	734.329	195.968	734.39
rs76034709	A	G	A	G	0.432359	0.062	0.0632693	0.066	FALSE	FALSE	FALSE	ukb-saige-153	13	45931661	0.044	387318	0.16	Colorectal cancer || id:ukb-saige-153	Colorectal cancer	Colorectal cancer || ||	TRUE	MedicineITLab	0.0706667	1732	1.16716e-09	LCP1	TRUE	reported	finn-pQTL-R10-v1-LCP1	2	TRUE	0.0221578	39.2016	195.968	37.4334
rs13161445	A	G	A	G	-0.422499	-0.068	0.0711815	0.057	FALSE	FALSE	FALSE	ukb-saige-153	5	135018695	0.047	387318	0.14	Colorectal cancer || id:ukb-saige-153	Colorectal cancer	Colorectal cancer || ||	TRUE	MedicineITLab	0.0648174	1732	9.30251e-11	LECT2	TRUE	reported	finn-pQTL-R10-v1-LECT2	2	TRUE	0.0236037	41.8215	195.968	42.4882
rs31530	T	C	T	C	-1.16174	0.027	0.65365	0.63	FALSE	FALSE	FALSE	ukb-saige-153	5	135282630	0.022	387318	0.22	Colorectal cancer || id:ukb-saige-153	Colorectal cancer	Colorectal cancer || ||	TRUE	MedicineITLab	0.0226744	1732	1e-200	LECT2	TRUE	reported	finn-pQTL-R10-v1-LECT2	2	TRUE	0.611094	2718.38	195.968	2625.1
rs34374657	C	A	C	A	0.231357	0.034	0.290287	0.28	FALSE	FALSE	FALSE	ukb-saige-153	1	226285575	0.024	387318	0.16	Colorectal cancer || id:ukb-saige-153	Colorectal cancer	Colorectal cancer || ||	TRUE	MedicineITLab	0.0372186	1732	6.37089e-10	LEFTY2	TRUE	reported	finn-pQTL-R10-v1-LEFTY2	2	TRUE	0.0220549	39.0155	195.968	38.6407
rs360059	A	G	A	G	-0.830453	-0.031	0.390032	0.37	FALSE	FALSE	FALSE	ukb-saige-153	1	226077132	0.022	387318	0.17	Colorectal cancer || id:ukb-saige-153	Colorectal cancer	Colorectal cancer || ||	TRUE	MedicineITLab	0.0287352	1732	3.4914e-150	LEFTY2	TRUE	reported	finn-pQTL-R10-v1-LEFTY2	2	TRUE	0.328146	844.965	195.968	835.222
rs12069188	T	G	T	G	0.295104	-0.048	0.235763	0.18	FALSE	FALSE	FALSE	ukb-saige-153	1	66059023	0.028	387318	0.085	Colorectal cancer || id:ukb-saige-153	Colorectal cancer	Colorectal cancer || ||	TRUE	MedicineITLab	0.0388494	1732	4.96707e-14	LEPR	TRUE	reported	finn-pQTL-R10-v1-LEPR	2	TRUE	0.0313822	56.0503	195.968	57.7008
rs713835	T	C	T	C	-0.206385	-0.022	0.315185	0.34	FALSE	FALSE	FALSE	ukb-saige-153	22	38064650	0.023	387318	0.33	Colorectal cancer || id:ukb-saige-153	Colorectal cancer	Colorectal cancer || ||	TRUE	MedicineITLab	0.0363229	1732	1.55952e-08	LGALS1	TRUE	reported	finn-pQTL-R10-v1-LGALS1	2	TRUE	0.0183876	32.4064	195.968	32.2846
rs35740158	C	T	C	T	0.23437	-0.005	0.200473	0.11	FALSE	FALSE	FALSE	ukb-saige-153	14	55974295	0.036	387318	0.89	Colorectal cancer || id:ukb-saige-153	Colorectal cancer	Colorectal cancer || ||	TRUE	MedicineITLab	0.0419813	1732	2.74429e-08	LGALS3	TRUE	reported	finn-pQTL-R10-v1-LGALS3	2	TRUE	0.0176085	31.0088	195.968	31.1668
rs4644	A	C	A	C	-0.628777	-0.033	0.515295	0.41	FALSE	FALSE	FALSE	ukb-saige-153	14	55604935	0.022	387318	0.13	Colorectal cancer || id:ukb-saige-153	Colorectal cancer	Colorectal cancer || ||	TRUE	MedicineITLab	0.0307214	1732	1.51182e-83	LGALS3	TRUE	reported	finn-pQTL-R10-v1-LGALS3	2	TRUE	0.197495	425.751	195.968	418.901
rs12034087	T	C	T	C	-0.495373	0.8	0.0757959	0.0014	FALSE	FALSE	FALSE	ukb-saige-153	1	237132908	0.31	387318	0.011	Colorectal cancer || id:ukb-saige-153	Colorectal cancer	Colorectal cancer || ||	TRUE	MedicineITLab	0.0636104	1732	1.16762e-14	LGALS8	TRUE	reported	finn-pQTL-R10-v1-LGALS8	2	TRUE	0.0343802	61.5954	195.968	60.6469
rs2794779	G	C	G	C	0.888455	0.054	0.738261	0.73	FALSE	TRUE	FALSE	ukb-saige-153	1	236732145	0.024	387318	0.024	Colorectal cancer || id:ukb-saige-153	Colorectal cancer	Colorectal cancer || ||	TRUE	MedicineITLab	0.0327195	1732	1.51008e-135	LGALS8	TRUE	reported	finn-pQTL-R10-v1-LGALS8	2	TRUE	0.305056	759.408	195.968	737.323
rs117845934	A	G	A	G	-1.15046	-0.0016	0.0156251	0.012	FALSE	FALSE	FALSE	ukb-saige-153	14	93178431	0.099	387318	0.99	Colorectal cancer || id:ukb-saige-153	Colorectal cancer	Colorectal cancer || ||	TRUE	MedicineITLab	0.136221	1732	6.31684e-17	LGMN	TRUE	reported	finn-pQTL-R10-v1-LGMN	2	TRUE	0.0407152	73.4269	195.968	71.3272
rs71488604	A	G	A	G	0.415457	-0.022	0.189602	0.19	FALSE	FALSE	FALSE	ukb-saige-153	10	126166767	0.028	387318	0.42	Colorectal cancer || id:ukb-saige-153	Colorectal cancer	Colorectal cancer || ||	TRUE	MedicineITLab	0.0424271	1732	4.49883e-22	LHPP	TRUE	reported	finn-pQTL-R10-v1-LHPP	2	TRUE	0.0530424	96.9034	195.968	95.8883
rs10405805	C	G	C	G	-0.846225	0.023	0.0195037	0.01	FALSE	TRUE	FALSE	ukb-saige-153	19	54983011	0.11	387318	0.83	Colorectal cancer || id:ukb-saige-153	Colorectal cancer	Colorectal cancer || ||	TRUE	MedicineITLab	0.122799	1732	7.72503e-12	LILRA2	TRUE	reported	finn-pQTL-R10-v1-LILRA2	2	TRUE	0.0273883	48.716	195.968	47.4878
rs8106636	C	T	C	T	-1.03704	-0.063	0.107968	0.095	FALSE	FALSE	FALSE	ukb-saige-153	19	55100459	0.036	387318	0.083	Colorectal cancer || id:ukb-saige-153	Colorectal cancer	Colorectal cancer || ||	TRUE	MedicineITLab	0.0482421	1732	4.84953e-91	LILRA2	TRUE	reported	finn-pQTL-R10-v1-LILRA2	2	TRUE	0.207156	452.017	195.968	462.103
rs651279	T	C	T	C	0.39327	-0.0073	0.587786	0.67	FALSE	FALSE	FALSE	ukb-saige-153	19	54813762	0.023	387318	0.75	Colorectal cancer || id:ukb-saige-153	Colorectal cancer	Colorectal cancer || ||	TRUE	MedicineITLab	0.0333285	1732	5.81166e-31	LILRA5	TRUE	reported	finn-pQTL-R10-v1-LILRA5	2	TRUE	0.0749469	140.163	195.968	139.236
rs11668526	T	C	T	C	0.840903	-0.011	0.583735	0.59	FALSE	FALSE	FALSE	ukb-saige-153	19	54749060	0.022	387318	0.61	Colorectal cancer || id:ukb-saige-153	Colorectal cancer	Colorectal cancer || ||	TRUE	MedicineITLab	0.0286998	1732	1.40281e-153	LILRA6	TRUE	reported	finn-pQTL-R10-v1-LILRA6	2	TRUE	0.343643	905.76	195.968	858.488
rs2361796	G	T	G	T	-0.326495	0.0095	0.266985	0.34	FALSE	FALSE	FALSE	ukb-saige-153	19	54754385	0.023	387318	0.68	Colorectal cancer || id:ukb-saige-153	Colorectal cancer	Colorectal cancer || ||	TRUE	MedicineITLab	0.0380506	1732	2.06538e-17	LILRA6	TRUE	reported	finn-pQTL-R10-v1-LILRA6	2	TRUE	0.0417237	75.3248	195.968	73.6258
rs62144175	A	G	A	G	0.591135	0.0009	0.0424705	0.038	FALSE	FALSE	FALSE	ukb-saige-153	19	54650022	0.057	387318	0.99	Colorectal cancer || id:ukb-saige-153	Colorectal cancer	Colorectal cancer || ||	TRUE	MedicineITLab	0.0839015	1732	2.65644e-12	LILRA6	TRUE	reported	finn-pQTL-R10-v1-LILRA6	2	TRUE	0.0284212	50.607	195.968	49.6402
rs453755	T	G	T	G	0.7185	0.00043	0.699648	0.77	FALSE	FALSE	FALSE	ukb-saige-153	19	54809343	0.025	387318	0.99	Colorectal cancer || id:ukb-saige-153	Colorectal cancer	Colorectal cancer || ||	TRUE	MedicineITLab	0.0329971	1732	4.21114e-93	LILRB1	TRUE	reported	finn-pQTL-R10-v1-LILRB1	2	TRUE	0.216967	479.358	195.968	474.135
rs75814910	A	C	A	C	0.404625	-0.012	0.083946	0.068	FALSE	FALSE	FALSE	ukb-saige-153	19	54812494	0.043	387318	0.78	Colorectal cancer || id:ukb-saige-153	Colorectal cancer	Colorectal cancer || ||	TRUE	MedicineITLab	0.061601	1732	6.70348e-11	LILRB1	TRUE	reported	finn-pQTL-R10-v1-LILRB1	2	TRUE	0.02518	44.6867	195.968	43.1449
rs2114650	A	G	A	G	-0.243916	-0.014	0.354972	0.32	FALSE	FALSE	FALSE	ukb-saige-153	19	54551282	0.023	387318	0.54	Colorectal cancer || id:ukb-saige-153	Colorectal cancer	Colorectal cancer || ||	TRUE	MedicineITLab	0.0347181	1732	3.05281e-12	LILRB2	TRUE	reported	finn-pQTL-R10-v1-LILRB2	2	TRUE	0.0272448	48.4536	195.968	49.3593
rs383925	C	T	C	T	1.15642	0.028	0.719265	0.8	FALSE	FALSE	FALSE	ukb-saige-153	19	54783521	0.027	387318	0.3	Colorectal cancer || id:ukb-saige-153	Colorectal cancer	Colorectal cancer || ||	TRUE	MedicineITLab	0.0254052	1732	1e-200	LILRB2	TRUE	reported	finn-pQTL-R10-v1-LILRB2	2	TRUE	0.540066	2031.41	195.968	2071.98
rs441716	A	G	A	G	0.204183	-0.011	0.590357	0.61	FALSE	FALSE	FALSE	ukb-saige-153	19	55169072	0.022	387318	0.62	Colorectal cancer || id:ukb-saige-153	Colorectal cancer	Colorectal cancer || ||	TRUE	MedicineITLab	0.0352789	1732	8.4559e-09	LILRB4	TRUE	reported	finn-pQTL-R10-v1-LILRB4	2	TRUE	0.0201646	35.6027	195.968	33.4972
rs731170	A	G	A	G	0.267166	0.051	0.314909	0.31	FALSE	FALSE	FALSE	ukb-saige-153	19	55176262	0.023	387318	0.028	Colorectal cancer || id:ukb-saige-153	Colorectal cancer	Colorectal cancer || ||	TRUE	MedicineITLab	0.0370972	1732	8.82877e-13	LILRB4	TRUE	reported	finn-pQTL-R10-v1-LILRB4	2	TRUE	0.0307982	54.974	195.968	51.8657
rs12975366	C	T	C	T	-1.23644	0.0066	0.361535	0.4	FALSE	FALSE	FALSE	ukb-saige-153	19	54759361	0.022	387318	0.76	Colorectal cancer || id:ukb-saige-153	Colorectal cancer	Colorectal cancer || ||	TRUE	MedicineITLab	0.0200466	1732	1e-200	LILRB5	TRUE	reported	finn-pQTL-R10-v1-LILRB5	2	TRUE	0.705771	4149.76	195.968	3804.21
rs2247133	T	G	T	G	-0.240803	0.026	0.61715	0.57	FALSE	FALSE	FALSE	ukb-saige-153	19	54749474	0.022	387318	0.23	Colorectal cancer || id:ukb-saige-153	Colorectal cancer	Colorectal cancer || ||	TRUE	MedicineITLab	0.0354893	1732	1.58672e-11	LILRB5	TRUE	reported	finn-pQTL-R10-v1-LILRB5	2	TRUE	0.0274014	48.74	195.968	46.0393
rs303509	G	T	G	T	-0.316865	-0.041	0.229886	0.28	FALSE	FALSE	FALSE	ukb-saige-153	10	90464714	0.024	387318	0.083	Colorectal cancer || id:ukb-saige-153	Colorectal cancer	Colorectal cancer || ||	TRUE	MedicineITLab	0.0395552	1732	2.07587e-15	LIPF	TRUE	reported	finn-pQTL-R10-v1-LIPF	2	TRUE	0.0355505	63.7695	195.968	64.1714
rs2820317	C	G	C	G	-0.243806	0.045	0.309875	0.35	FALSE	TRUE	FALSE	ukb-saige-153	1	201878537	0.022	387318	0.042	Colorectal cancer || id:ukb-saige-153	Colorectal cancer	Colorectal cancer || ||	TRUE	MedicineITLab	0.0356988	1732	1.17544e-11	LMOD1	TRUE	reported	finn-pQTL-R10-v1-LMOD1	2	TRUE	0.0254234	45.1298	195.968	46.6425
rs3757021	C	A	C	A	-0.266764	-0.0036	0.73314	0.76	FALSE	FALSE	FALSE	ukb-saige-153	6	161490259	0.025	387318	0.89	Colorectal cancer || id:ukb-saige-153	Colorectal cancer	Colorectal cancer || ||	TRUE	MedicineITLab	0.037382	1732	1.40637e-12	LPA	TRUE	reported	finn-pQTL-R10-v1-LPA	2	TRUE	0.0278455	49.5525	195.968	50.9248
rs58432601	A	G	A	G	-0.329978	0.018	0.206053	0.12	FALSE	FALSE	FALSE	ukb-saige-153	6	160884100	0.033	387318	0.59	Colorectal cancer || id:ukb-saige-153	Colorectal cancer	Colorectal cancer || ||	TRUE	MedicineITLab	0.0423754	1732	1.17301e-14	LPA	TRUE	reported	finn-pQTL-R10-v1-LPA	2	TRUE	0.0356263	63.9103	195.968	60.6376
rs783147	A	G	A	G	-0.433015	-0.0075	0.472769	0.44	FALSE	FALSE	FALSE	ukb-saige-153	6	161137990	0.021	387318	0.73	Colorectal cancer || id:ukb-saige-153	Colorectal cancer	Colorectal cancer || ||	TRUE	MedicineITLab	0.0323717	1732	6.63437e-39	LPA	TRUE	reported	finn-pQTL-R10-v1-LPA	2	TRUE	0.0934729	178.382	195.968	178.927
rs1011685	T	C	T	C	-0.444724	-0.016	0.0874507	0.1	FALSE	FALSE	FALSE	ukb-saige-153	8	19830769	0.035	387318	0.66	Colorectal cancer || id:ukb-saige-153	Colorectal cancer	Colorectal cancer || ||	TRUE	MedicineITLab	0.0594843	1732	1.20809e-13	LPL	TRUE	reported	finn-pQTL-R10-v1-LPL	2	TRUE	0.0315668	56.3907	195.968	55.8954
rs3785496	G	A	G	A	-0.32987	0.023	0.331956	0.24	FALSE	FALSE	FALSE	ukb-saige-153	17	56274133	0.025	387318	0.36	Colorectal cancer || id:ukb-saige-153	Colorectal cancer	Colorectal cancer || ||	TRUE	MedicineITLab	0.0353824	1732	3.3335e-20	LPO	TRUE	reported	finn-pQTL-R10-v1-LPO	2	TRUE	0.0482615	87.7263	195.968	86.9183
rs73920835	C	T	C	T	-0.458411	0.009	0.0464928	0.078	FALSE	FALSE	FALSE	ukb-saige-153	19	4524866	0.04	387318	0.82	Colorectal cancer || id:ukb-saige-153	Colorectal cancer	Colorectal cancer || ||	TRUE	MedicineITLab	0.0779857	1732	4.9673e-09	LRG1	TRUE	reported	finn-pQTL-R10-v1-LRG1	2	TRUE	0.0186316	32.8446	195.968	34.5526
rs140731112	T	C	T	C	-1.2448	-0.086	0.0141048	0.017	FALSE	FALSE	FALSE	ukb-saige-153	3	66557025	0.087	387318	0.32	Colorectal cancer || id:ukb-saige-153	Colorectal cancer	Colorectal cancer || ||	TRUE	MedicineITLab	0.141731	1732	3.75491e-18	LRIG1	TRUE	reported	finn-pQTL-R10-v1-LRIG1	2	TRUE	0.043095	77.912	195.968	77.1382
rs2306272	C	T	C	T	-0.929197	-0.047	0.244582	0.29	FALSE	FALSE	FALSE	ukb-saige-153	3	66434643	0.024	387318	0.046	Colorectal cancer || id:ukb-saige-153	Colorectal cancer	Colorectal cancer || ||	TRUE	MedicineITLab	0.0335355	1732	3.7325e-140	LRIG1	TRUE	reported	finn-pQTL-R10-v1-LRIG1	2	TRUE	0.319049	810.565	195.968	767.726
rs12195866	G	A	G	A	0.663472	-0.026	0.39977	0.35	FALSE	FALSE	FALSE	ukb-saige-153	6	150014470	0.022	387318	0.24	Colorectal cancer || id:ukb-saige-153	Colorectal cancer	Colorectal cancer || ||	TRUE	MedicineITLab	0.0304926	1732	5.55648e-93	LRP11	TRUE	reported	finn-pQTL-R10-v1-LRP11	2	TRUE	0.211253	463.353	195.968	473.431
rs6937786	C	T	C	T	0.232572	-0.00089	0.202962	0.21	FALSE	FALSE	FALSE	ukb-saige-153	6	149582909	0.026	387318	0.97	Colorectal cancer || id:ukb-saige-153	Colorectal cancer	Colorectal cancer || ||	TRUE	MedicineITLab	0.0422208	1732	4.16418e-08	LRP11	TRUE	reported	finn-pQTL-R10-v1-LRP11	2	TRUE	0.0175	30.8143	195.968	30.3432
rs143486729	A	G	A	G	-0.754843	-0.021	0.0241577	0.034	FALSE	FALSE	FALSE	ukb-saige-153	4	3525656	0.059	387318	0.73	Colorectal cancer || id:ukb-saige-153	Colorectal cancer	Colorectal cancer || ||	TRUE	MedicineITLab	0.109858	1732	8.85931e-12	LRPAP1	TRUE	reported	finn-pQTL-R10-v1-LRPAP1	2	TRUE	0.0268645	47.7586	195.968	47.2117
rs140820111	C	T	C	T	1.32051	0.11	0.0234819	0.0054	FALSE	FALSE	FALSE	ukb-saige-153	17	44040403	0.17	387318	0.49	Colorectal cancer || id:ukb-saige-153	Colorectal cancer	Colorectal cancer || ||	TRUE	MedicineITLab	0.105326	1732	1.41319e-34	LRRC37A2	TRUE	reported	finn-pQTL-R10-v1-LRRC37A2	2	TRUE	0.07997	150.373	195.968	157.185
rs354589	A	G	A	G	0.370715	0.04	0.313144	0.32	FALSE	FALSE	FALSE	ukb-saige-153	1	13821977	0.023	387318	0.08	Colorectal cancer || id:ukb-saige-153	Colorectal cancer	Colorectal cancer || ||	TRUE	MedicineITLab	0.0354173	1732	6.66807e-25	LRRC38	TRUE	reported	finn-pQTL-R10-v1-LRRC38	2	TRUE	0.0591181	108.7	195.968	109.559
rs1065344	G	T	G	T	0.801017	0.0031	0.384952	0.32	FALSE	FALSE	FALSE	ukb-saige-153	3	3807031	0.023	387318	0.89	Colorectal cancer || id:ukb-saige-153	Colorectal cancer	Colorectal cancer || ||	TRUE	MedicineITLab	0.0285746	1732	7.19449e-143	LRRN1	TRUE	reported	finn-pQTL-R10-v1-LRRN1	2	TRUE	0.303829	755.021	195.968	785.82
rs79107096	A	T	A	T	-0.411055	-0.054	0.0699158	0.042	FALSE	TRUE	FALSE	ukb-saige-153	3	4075357	0.053	387318	0.31	Colorectal cancer || id:ukb-saige-153	Colorectal cancer	Colorectal cancer || ||	TRUE	MedicineITLab	0.0657198	1732	5.00899e-10	LRRN1	TRUE	reported	finn-pQTL-R10-v1-LRRN1	2	TRUE	0.0219749	38.8708	195.968	39.1208
rs907612	T	C	T	C	0.205263	-0.0068	0.385238	0.38	FALSE	FALSE	FALSE	ukb-saige-153	11	1874221	0.022	387318	0.76	Colorectal cancer || id:ukb-saige-153	Colorectal cancer	Colorectal cancer || ||	TRUE	MedicineITLab	0.0352768	1732	7.0544e-09	LSP1	TRUE	reported	finn-pQTL-R10-v1-LSP1	2	TRUE	0.0199566	35.228	195.968	33.8566
rs1265115	A	C	A	C	-0.22035	0.013	0.332771	0.31	FALSE	FALSE	FALSE	ukb-saige-153	6	31117075	0.023	387318	0.58	Colorectal cancer || id:ukb-saige-153	Colorectal cancer	Colorectal cancer || ||	TRUE	MedicineITLab	0.0389933	1483	1.91047e-08	LTA	TRUE	reported	finn-pQTL-R10-v1-LTA	2	TRUE	0.0215614	32.6361	195.968	31.9335
rs2229092	C	A	C	A	-1.40028	-0.029	0.0534767	0.062	FALSE	FALSE	FALSE	ukb-saige-153	6	31540757	0.044	387318	0.51	Colorectal cancer || id:ukb-saige-153	Colorectal cancer	Colorectal cancer || ||	TRUE	MedicineITLab	0.0733274	1483	7.53182e-73	LTA	TRUE	reported	finn-pQTL-R10-v1-LTA	2	TRUE	0.198498	366.78	195.968	364.668
rs10896017	T	C	T	C	0.840691	0.038	0.0545838	0.054	FALSE	FALSE	FALSE	ukb-saige-153	11	65340135	0.047	387318	0.42	Colorectal cancer || id:ukb-saige-153	Colorectal cancer	Colorectal cancer || ||	TRUE	MedicineITLab	0.0725041	1732	5.4325e-30	LTBP3	TRUE	reported	finn-pQTL-R10-v1-LTBP3	2	TRUE	0.072944	136.122	195.968	134.446
rs1152618	C	G	C	G	0.271986	0.048	0.149485	0.065	FALSE	TRUE	FALSE	ukb-saige-153	11	65114850	0.045	387318	0.29	Colorectal cancer || id:ukb-saige-153	Colorectal cancer	Colorectal cancer || ||	TRUE	MedicineITLab	0.0481445	1732	1.87923e-08	LTBP3	TRUE	reported	finn-pQTL-R10-v1-LTBP3	2	TRUE	0.0188106	33.1662	195.968	31.9154
rs7977602	G	A	G	A	-0.367337	-0.015	0.705551	0.65	FALSE	FALSE	FALSE	ukb-saige-153	12	6498734	0.022	387318	0.5	Colorectal cancer || id:ukb-saige-153	Colorectal cancer	Colorectal cancer || ||	TRUE	MedicineITLab	0.0369565	1732	1.11892e-22	LTBR	TRUE	reported	finn-pQTL-R10-v1-LTBR	2	TRUE	0.0560658	102.755	195.968	98.7979
rs6441207	T	C	T	C	-0.189993	-0.01	0.378255	0.4	FALSE	FALSE	FALSE	ukb-saige-153	3	158282459	0.022	387318	0.64	Colorectal cancer || id:ukb-saige-153	Colorectal cancer	Colorectal cancer || ||	TRUE	MedicineITLab	0.0345207	1732	4.27543e-08	LXN	TRUE	reported	finn-pQTL-R10-v1-LXN	2	TRUE	0.0169786	29.8803	195.968	30.2912
rs2585159	A	G	A	G	-0.529756	-0.0027	0.359421	0.4	FALSE	FALSE	FALSE	ukb-saige-153	8	143875817	0.022	387318	0.9	Colorectal cancer || id:ukb-saige-153	Colorectal cancer	Colorectal cancer || ||	TRUE	MedicineITLab	0.0328647	1732	1.43549e-54	LY6D	TRUE	reported	finn-pQTL-R10-v1-LY6D	2	TRUE	0.129228	256.744	195.968	259.832
rs181944845	C	T	C	T	0.458363	0.043	0.0566873	0.017	FALSE	FALSE	FALSE	ukb-saige-153	2	161680544	0.085	387318	0.61	Colorectal cancer || id:ukb-saige-153	Colorectal cancer	Colorectal cancer || ||	TRUE	MedicineITLab	0.0749501	1732	1.18672e-09	LY75	TRUE	reported	finn-pQTL-R10-v1-LY75	2	TRUE	0.0224694	39.7655	195.968	37.4003
rs35495547	T	C	T	C	-0.271843	0.014	0.133968	0.15	FALSE	FALSE	FALSE	ukb-saige-153	2	159725345	0.03	387318	0.63	Colorectal cancer || id:ukb-saige-153	Colorectal cancer	Colorectal cancer || ||	TRUE	MedicineITLab	0.0496267	1732	4.94015e-08	LY75	TRUE	reported	finn-pQTL-R10-v1-LY75	2	TRUE	0.0171475	30.1828	195.968	30.0058
rs6720948	A	C	A	C	0.229679	0.0097	0.624792	0.66	FALSE	FALSE	FALSE	ukb-saige-153	2	160674656	0.023	387318	0.67	Colorectal cancer || id:ukb-saige-153	Colorectal cancer	Colorectal cancer || ||	TRUE	MedicineITLab	0.0350965	1732	7.85778e-11	LY75	TRUE	reported	finn-pQTL-R10-v1-LY75	2	TRUE	0.0247332	43.8736	195.968	42.8267
rs72957586	A	G	A	G	0.943872	-0.027	0.605954	0.56	FALSE	FALSE	FALSE	ukb-saige-153	2	160762687	0.021	387318	0.21	Colorectal cancer || id:ukb-saige-153	Colorectal cancer	Colorectal cancer || ||	TRUE	MedicineITLab	0.0262425	1732	1e-200	LY75	TRUE	reported	finn-pQTL-R10-v1-LY75	2	TRUE	0.425444	1281.02	195.968	1293.65
rs11265492	A	G	A	G	0.553835	-0.056	0.286037	0.22	FALSE	FALSE	FALSE	ukb-saige-153	1	160799274	0.026	387318	0.032	Colorectal cancer || id:ukb-saige-153	Colorectal cancer	Colorectal cancer || ||	TRUE	MedicineITLab	0.0351163	1732	1.84204e-52	LY9	TRUE	reported	finn-pQTL-R10-v1-LY9	2	TRUE	0.125282	247.78	195.968	248.739
rs116645440	G	C	G	C	0.768593	-0.11	0.0175498	0.013	FALSE	TRUE	FALSE	ukb-saige-153	1	161230190	0.1	387318	0.28	Colorectal cancer || id:ukb-saige-153	Colorectal cancer	Colorectal cancer || ||	TRUE	MedicineITLab	0.129107	1732	3.17753e-09	LY9	TRUE	reported	finn-pQTL-R10-v1-LY9	2	TRUE	0.0203707	35.9741	195.968	35.44
rs2599442	A	G	A	G	0.356264	-0.033	0.267283	0.22	FALSE	FALSE	FALSE	ukb-saige-153	19	43995275	0.026	387318	0.2	Colorectal cancer || id:ukb-saige-153	Colorectal cancer	Colorectal cancer || ||	TRUE	MedicineITLab	0.0368629	1732	1.47843e-21	LYPD3	TRUE	reported	finn-pQTL-R10-v1-LYPD3	2	TRUE	0.0497143	90.5052	195.968	93.4039
rs12744158	T	G	T	G	-0.851486	-0.025	0.0721201	0.073	FALSE	FALSE	FALSE	ukb-saige-153	1	249115009	0.049	387318	0.62	Colorectal cancer || id:ukb-saige-153	Colorectal cancer	Colorectal cancer || ||	TRUE	MedicineITLab	0.0640849	1732	1.96879e-38	LYPD8	TRUE	reported	finn-pQTL-R10-v1-LYPD8	2	TRUE	0.097036	185.913	195.968	176.54
rs2387788	A	G	A	G	-0.380034	-0.0045	0.776663	0.81	FALSE	FALSE	FALSE	ukb-saige-153	1	248809421	0.032	387318	0.89	Colorectal cancer || id:ukb-saige-153	Colorectal cancer	Colorectal cancer || ||	TRUE	MedicineITLab	0.0438952	1732	1.08193e-17	LYPD8	TRUE	reported	finn-pQTL-R10-v1-LYPD8	2	TRUE	0.0501035	91.2511	195.968	74.9568
rs56408811	T	C	T	C	0.643969	0.00044	0.0297186	0.026	FALSE	FALSE	FALSE	ukb-saige-153	1	248093209	0.069	387318	0.99	Colorectal cancer || id:ukb-saige-153	Colorectal cancer	Colorectal cancer || ||	TRUE	MedicineITLab	0.100132	1732	1.63369e-10	LYPD8	TRUE	reported	finn-pQTL-R10-v1-LYPD8	2	TRUE	0.0239159	42.3882	195.968	41.3603
rs116055980	G	A	G	A	0.537747	-0.021	0.0664108	0.042	FALSE	FALSE	FALSE	ukb-saige-153	11	10618765	0.053	387318	0.7	Colorectal cancer || id:ukb-saige-153	Colorectal cancer	Colorectal cancer || ||	TRUE	MedicineITLab	0.0676805	1732	3.4578e-15	LYVE1	TRUE	reported	finn-pQTL-R10-v1-LYVE1	2	TRUE	0.0358575	64.3406	195.968	63.129
rs78757254	A	T	A	T	0.569112	-0.095	0.0520208	0.039	FALSE	TRUE	FALSE	ukb-saige-153	10	30891599	0.055	387318	0.085	Colorectal cancer || id:ukb-saige-153	Colorectal cancer	Colorectal cancer || ||	TRUE	MedicineITLab	0.0749534	1732	5.08745e-14	LYZL2	TRUE	reported	finn-pQTL-R10-v1-LYZL2	2	TRUE	0.0319449	57.0883	195.968	57.6518
rs17443354	G	A	G	A	0.296812	-0.013	0.261886	0.28	FALSE	FALSE	FALSE	ukb-saige-153	9	72602966	0.024	387318	0.58	Colorectal cancer || id:ukb-saige-153	Colorectal cancer	Colorectal cancer || ||	TRUE	MedicineITLab	0.0377687	1732	6.76706e-15	MAMDC2	TRUE	reported	finn-pQTL-R10-v1-MAMDC2	2	TRUE	0.0340587	60.9992	195.968	61.7588
rs139342127	A	G	A	G	-0.657304	-0.024	0.0220792	0.026	FALSE	FALSE	FALSE	ukb-saige-153	9	139901410	0.067	387318	0.72	Colorectal cancer || id:ukb-saige-153	Colorectal cancer	Colorectal cancer || ||	TRUE	MedicineITLab	0.115127	1732	1.33174e-08	MAMDC4	TRUE	reported	finn-pQTL-R10-v1-MAMDC4	2	TRUE	0.0186573	32.8908	195.968	32.597
rs2301789	G	A	G	A	0.899476	-0.0094	0.423126	0.47	FALSE	FALSE	FALSE	ukb-saige-153	4	6602255	0.021	387318	0.66	Colorectal cancer || id:ukb-saige-153	Colorectal cancer	Colorectal cancer || ||	TRUE	MedicineITLab	0.0269525	1732	6.05341e-189	MAN2B2	TRUE	reported	finn-pQTL-R10-v1-MAN2B2	2	TRUE	0.394966	1129.34	195.968	1113.73
rs4689512	C	T	C	T	-0.391508	0.012	0.725653	0.69	FALSE	FALSE	FALSE	ukb-saige-153	4	6681723	0.023	387318	0.61	Colorectal cancer || id:ukb-saige-153	Colorectal cancer	Colorectal cancer || ||	TRUE	MedicineITLab	0.037285	1732	4.7852e-25	MAN2B2	TRUE	reported	finn-pQTL-R10-v1-MAN2B2	2	TRUE	0.0610296	112.444	195.968	110.259
rs12368838	G	A	G	A	0.799816	0.0069	0.213308	0.23	FALSE	FALSE	FALSE	ukb-saige-153	12	27921677	0.025	387318	0.79	Colorectal cancer || id:ukb-saige-153	Colorectal cancer	Colorectal cancer || ||	TRUE	MedicineITLab	0.0367177	1732	3.65679e-93	MANSC4	TRUE	reported	finn-pQTL-R10-v1-MANSC4	2	TRUE	0.214695	472.966	195.968	474.492
rs930397	G	A	G	A	-0.373588	0.012	0.199921	0.23	FALSE	FALSE	FALSE	ukb-saige-153	2	119696560	0.025	387318	0.64	Colorectal cancer || id:ukb-saige-153	Colorectal cancer	Colorectal cancer || ||	TRUE	MedicineITLab	0.0413233	1732	4.06443e-19	MARCO	TRUE	reported	finn-pQTL-R10-v1-MARCO	2	TRUE	0.0446485	80.8519	195.968	81.7327
rs62292760	C	G	C	G	-0.257396	0.00073	0.337478	0.34	FALSE	TRUE	FALSE	ukb-saige-153	3	186994811	0.023	387318	0.97	Colorectal cancer || id:ukb-saige-153	Colorectal cancer	Colorectal cancer || ||	TRUE	MedicineITLab	0.0347947	1732	2.15229e-13	MASP1	TRUE	reported	finn-pQTL-R10-v1-MASP1	2	TRUE	0.0296264	52.8186	195.968	54.7239
rs1869609	G	A	G	A	0.322019	-0.004	0.570324	0.66	FALSE	FALSE	FALSE	ukb-saige-153	8	98991221	0.023	387318	0.86	Colorectal cancer || id:ukb-saige-153	Colorectal cancer	Colorectal cancer || ||	TRUE	MedicineITLab	0.0330025	1732	6.23161e-22	MATN2	TRUE	reported	finn-pQTL-R10-v1-MATN2	2	TRUE	0.0508225	92.6306	195.968	95.2071
rs11694716	A	G	A	G	-0.644088	-0.074	0.698226	0.64	FALSE	FALSE	FALSE	ukb-saige-153	2	20207619	0.022	387318	0.00099	Colorectal cancer || id:ukb-saige-153	Colorectal cancer	Colorectal cancer || ||	TRUE	MedicineITLab	0.0342928	1732	8.97842e-72	MATN3	TRUE	reported	finn-pQTL-R10-v1-MATN3	2	TRUE	0.174823	366.52	195.968	352.764
rs7586564	T	C	T	C	-0.223346	0.011	0.233985	0.25	FALSE	FALSE	FALSE	ukb-saige-153	2	19788211	0.025	387318	0.64	Colorectal cancer || id:ukb-saige-153	Colorectal cancer	Colorectal cancer || ||	TRUE	MedicineITLab	0.0400982	1732	2.94883e-08	MATN3	TRUE	reported	finn-pQTL-R10-v1-MATN3	2	TRUE	0.0178818	31.4988	195.968	31.0246
rs79825422	T	G	T	G	-0.604047	0.0059	0.0384357	0.016	FALSE	FALSE	FALSE	ukb-saige-153	2	20294090	0.086	387318	0.94	Colorectal cancer || id:ukb-saige-153	Colorectal cancer	Colorectal cancer || ||	TRUE	MedicineITLab	0.0848279	1732	1.56639e-12	MATN3	TRUE	reported	finn-pQTL-R10-v1-MATN3	2	TRUE	0.0269702	47.9518	195.968	50.7065
rs12782244	A	G	A	G	-0.294478	0.018	0.385068	0.42	FALSE	FALSE	FALSE	ukb-saige-153	10	54534993	0.022	387318	0.4	Colorectal cancer || id:ukb-saige-153	Colorectal cancer	Colorectal cancer || ||	TRUE	MedicineITLab	0.0339645	1732	9.74541e-18	MBL2	TRUE	reported	finn-pQTL-R10-v1-MBL2	2	TRUE	0.0410677	74.0898	195.968	75.1719
rs146917309	T	C	T	C	0.574265	-0.025	0.03495	0.0059	FALSE	FALSE	FALSE	ukb-saige-153	10	54308061	0.15	387318	0.86	Colorectal cancer || id:ukb-saige-153	Colorectal cancer	Colorectal cancer || ||	TRUE	MedicineITLab	0.0928799	1732	7.83466e-10	MBL2	TRUE	reported	finn-pQTL-R10-v1-MBL2	2	TRUE	0.022246	39.3612	195.968	38.228
rs7899547	G	T	G	T	0.995696	-0.022	0.687593	0.65	FALSE	FALSE	FALSE	ukb-saige-153	10	54536839	0.022	387318	0.32	Colorectal cancer || id:ukb-saige-153	Colorectal cancer	Colorectal cancer || ||	TRUE	MedicineITLab	0.0284734	1732	1e-200	MBL2	TRUE	reported	finn-pQTL-R10-v1-MBL2	2	TRUE	0.425928	1283.56	195.968	1222.85
rs34587557	C	T	C	T	-0.447505	0.016	0.0490026	0.053	FALSE	FALSE	FALSE	ukb-saige-153	11	119185677	0.048	387318	0.74	Colorectal cancer || id:ukb-saige-153	Colorectal cancer	Colorectal cancer || ||	TRUE	MedicineITLab	0.0787951	1732	1.58285e-08	MCAM	TRUE	reported	finn-pQTL-R10-v1-MCAM	2	TRUE	0.0186648	32.9043	195.968	32.255
rs1051317	T	G	T	G	0.347396	0.0081	0.28258	0.29	FALSE	FALSE	FALSE	ukb-saige-153	2	47130148	0.024	387318	0.73	Colorectal cancer || id:ukb-saige-153	Colorectal cancer	Colorectal cancer || ||	TRUE	MedicineITLab	0.036261	1732	3.2144e-21	MCFD2	TRUE	reported	finn-pQTL-R10-v1-MCFD2	2	TRUE	0.0489322	89.008	195.968	91.7847
rs16890436	A	G	A	G	0.463161	-0.0011	0.0460275	0.019	FALSE	FALSE	FALSE	ukb-saige-153	6	38176714	0.08	387318	0.99	Colorectal cancer || id:ukb-saige-153	Colorectal cancer	Colorectal cancer || ||	TRUE	MedicineITLab	0.0809382	1732	1.23535e-08	MDGA1	TRUE	reported	finn-pQTL-R10-v1-MDGA1	2	TRUE	0.0188385	33.2164	195.968	32.7459
rs75491122	T	C	T	C	-0.479482	-0.092	0.071606	0.035	FALSE	FALSE	FALSE	ukb-saige-153	6	37945414	0.059	387318	0.12	Colorectal cancer || id:ukb-saige-153	Colorectal cancer	Colorectal cancer || ||	TRUE	MedicineITLab	0.0661994	1732	6.57809e-13	MDGA1	TRUE	reported	finn-pQTL-R10-v1-MDGA1	2	TRUE	0.0305672	54.5487	195.968	52.461
rs9349050	C	T	C	T	-1.14139	0.004	0.59375	0.51	FALSE	FALSE	FALSE	ukb-saige-153	6	37663624	0.021	387318	0.85	Colorectal cancer || id:ukb-saige-153	Colorectal cancer	Colorectal cancer || ||	TRUE	MedicineITLab	0.022619	1732	1e-200	MDGA1	TRUE	reported	finn-pQTL-R10-v1-MDGA1	2	TRUE	0.628485	2926.61	195.968	2546.37
rs144474140	T	C	T	C	1.1518	-0.04	0.0141455	0.026	FALSE	FALSE	FALSE	ukb-saige-153	5	126895474	0.066	387318	0.55	Colorectal cancer || id:ukb-saige-153	Colorectal cancer	Colorectal cancer || ||	TRUE	MedicineITLab	0.142281	1732	1.06635e-15	MEGF10	TRUE	reported	finn-pQTL-R10-v1-MEGF10	2	TRUE	0.0370012	66.4715	195.968	65.533
rs1324472	T	C	T	C	0.366612	0.0064	0.703247	0.69	FALSE	FALSE	FALSE	ukb-saige-153	9	123375110	0.023	387318	0.78	Colorectal cancer || id:ukb-saige-153	Colorectal cancer	Colorectal cancer || ||	TRUE	MedicineITLab	0.0366801	1732	6.62064e-23	MEGF9	TRUE	reported	finn-pQTL-R10-v1-MEGF9	2	TRUE	0.0560979	102.817	195.968	99.897
rs13068335	T	G	T	G	-0.495957	0.041	0.0600599	0.027	FALSE	FALSE	FALSE	ukb-saige-153	3	196552008	0.071	387318	0.56	Colorectal cancer || id:ukb-saige-153	Colorectal cancer	Colorectal cancer || ||	TRUE	MedicineITLab	0.071906	1732	7.40628e-12	MELTF	TRUE	reported	finn-pQTL-R10-v1-MELTF	2	TRUE	0.0277717	49.4175	195.968	47.5727
rs139795278	T	C	T	C	1.15569	-0.11	0.0145666	0.0066	FALSE	FALSE	FALSE	ukb-saige-153	3	197071812	0.14	387318	0.41	Colorectal cancer || id:ukb-saige-153	Colorectal cancer	Colorectal cancer || ||	TRUE	MedicineITLab	0.141075	1732	4.93628e-16	MELTF	TRUE	reported	finn-pQTL-R10-v1-MELTF	2	TRUE	0.0383441	68.9802	195.968	67.1093
rs15614	G	A	G	A	-0.336025	-0.011	0.088961	0.086	FALSE	FALSE	FALSE	ukb-saige-153	3	196558949	0.038	387318	0.77	Colorectal cancer || id:ukb-saige-153	Colorectal cancer	Colorectal cancer || ||	TRUE	MedicineITLab	0.0588158	1732	1.30299e-08	MELTF	TRUE	reported	finn-pQTL-R10-v1-MELTF	2	TRUE	0.0183025	32.2536	195.968	32.6404
rs73210523	A	G	A	G	-0.382865	0.039	0.172963	0.17	FALSE	FALSE	FALSE	ukb-saige-153	3	196876600	0.029	387318	0.17	Colorectal cancer || id:ukb-saige-153	Colorectal cancer	Colorectal cancer || ||	TRUE	MedicineITLab	0.043654	1732	4.17254e-18	MELTF	TRUE	reported	finn-pQTL-R10-v1-MELTF	2	TRUE	0.0419372	75.7271	195.968	76.9207
rs150204840	T	C	T	C	0.396479	0.062	0.0668082	0.007	FALSE	FALSE	FALSE	ukb-saige-153	6	46759431	0.13	387318	0.64	Colorectal cancer || id:ukb-saige-153	Colorectal cancer	Colorectal cancer || ||	TRUE	MedicineITLab	0.0687987	1732	9.76922e-09	MEP1A	TRUE	reported	finn-pQTL-R10-v1-MEP1A	2	TRUE	0.0196007	34.5871	195.968	33.2108
rs62093514	T	C	T	C	1.00784	0.051	0.0220838	0.028	FALSE	FALSE	FALSE	ukb-saige-153	18	29230977	0.066	387318	0.44	Colorectal cancer || id:ukb-saige-153	Colorectal cancer	Colorectal cancer || ||	TRUE	MedicineITLab	0.11471	1732	3.65511e-18	MEP1B	TRUE	reported	finn-pQTL-R10-v1-MEP1B	2	TRUE	0.0438721	79.3814	195.968	77.1935
rs680321	C	T	C	T	-1.07165	0.0059	0.420211	0.46	FALSE	FALSE	FALSE	ukb-saige-153	18	29797958	0.021	387318	0.78	Colorectal cancer || id:ukb-saige-153	Colorectal cancer	Colorectal cancer || ||	TRUE	MedicineITLab	0.0233285	1732	1e-200	MEP1B	TRUE	reported	finn-pQTL-R10-v1-MEP1B	2	TRUE	0.559594	2198.2	195.968	2110.24
rs1554214	A	G	A	G	-0.343055	0.0076	0.672055	0.62	FALSE	FALSE	FALSE	ukb-saige-153	2	112743917	0.022	387318	0.73	Colorectal cancer || id:ukb-saige-153	Colorectal cancer	Colorectal cancer || ||	TRUE	MedicineITLab	0.0356561	1732	2.2075e-21	MERTK	TRUE	reported	finn-pQTL-R10-v1-MERTK	2	TRUE	0.0518756	94.6551	195.968	92.5678
rs12154364	A	G	A	G	-0.20457	-0.034	0.345041	0.39	FALSE	FALSE	FALSE	ukb-saige-153	7	116498971	0.022	387318	0.12	Colorectal cancer || id:ukb-saige-153	Colorectal cancer	Colorectal cancer || ||	TRUE	MedicineITLab	0.0352038	1732	7.37666e-09	MET	TRUE	reported	finn-pQTL-R10-v1-MET	2	TRUE	0.0189147	33.3532	195.968	33.768
rs139356332	C	G	C	G	-0.745642	0.19	0.0204377	0.023	FALSE	TRUE	FALSE	ukb-saige-153	17	19289286	0.073	387318	0.0095	Colorectal cancer || id:ukb-saige-153	Colorectal cancer	Colorectal cancer || ||	TRUE	MedicineITLab	0.121742	1732	1.12171e-09	MFAP4	TRUE	reported	finn-pQTL-R10-v1-MFAP4	2	TRUE	0.0222615	39.3893	195.968	37.5128
rs2280213	C	T	C	T	0.371037	0.026	0.257021	0.28	FALSE	FALSE	FALSE	ukb-saige-153	15	89452763	0.024	387318	0.28	Colorectal cancer || id:ukb-saige-153	Colorectal cancer	Colorectal cancer || ||	TRUE	MedicineITLab	0.0386218	1732	2.51884e-21	MFGE8	TRUE	reported	finn-pQTL-R10-v1-MFGE8	2	TRUE	0.0525787	96.0091	195.968	92.2931
rs10829612	T	C	T	C	-0.263636	-0.025	0.426472	0.34	FALSE	FALSE	FALSE	ukb-saige-153	10	131452382	0.022	387318	0.26	Colorectal cancer || id:ukb-saige-153	Colorectal cancer	Colorectal cancer || ||	TRUE	MedicineITLab	0.0334892	1732	6.09397e-15	MGMT	TRUE	reported	finn-pQTL-R10-v1-MGMT	2	TRUE	0.0340004	60.8911	195.968	61.9726
rs16906252	T	C	T	C	-0.727807	-0.077	0.0948343	0.06	FALSE	FALSE	FALSE	ukb-saige-153	10	131265545	0.048	387318	0.11	Colorectal cancer || id:ukb-saige-153	Colorectal cancer	Colorectal cancer || ||	TRUE	MedicineITLab	0.0561701	1732	1.02967e-36	MGMT	TRUE	reported	finn-pQTL-R10-v1-MGMT	2	TRUE	0.0909402	173.065	195.968	167.889
rs141250326	A	G	A	G	0.615494	-0.032	0.0304714	0.02	FALSE	FALSE	FALSE	ukb-saige-153	19	41664653	0.078	387318	0.68	Colorectal cancer || id:ukb-saige-153	Colorectal cancer	Colorectal cancer || ||	TRUE	MedicineITLab	0.0994554	1732	7.55945e-10	MIA	TRUE	reported	finn-pQTL-R10-v1-MIA	2	TRUE	0.0223836	39.6103	195.968	38.2993
rs2231737	A	G	A	G	0.796837	0.018	0.0212415	0.023	FALSE	FALSE	FALSE	ukb-saige-153	19	40450105	0.071	387318	0.8	Colorectal cancer || id:ukb-saige-153	Colorectal cancer	Colorectal cancer || ||	TRUE	MedicineITLab	0.11636	1732	1.03681e-11	MIA	TRUE	reported	finn-pQTL-R10-v1-MIA	2	TRUE	0.0264016	46.9133	195.968	46.8955
rs2607419	G	A	G	A	1.29877	0.041	0.135967	0.072	FALSE	FALSE	FALSE	ukb-saige-153	19	41279395	0.041	387318	0.33	Colorectal cancer || id:ukb-saige-153	Colorectal cancer	Colorectal cancer || ||	TRUE	MedicineITLab	0.0378985	1732	6.98232e-197	MIA	TRUE	reported	finn-pQTL-R10-v1-MIA	2	TRUE	0.396331	1135.81	195.968	1174.41
rs41530251	C	T	C	T	-0.286092	0.012	0.370178	0.4	FALSE	FALSE	FALSE	ukb-saige-153	19	41316355	0.022	387318	0.59	Colorectal cancer || id:ukb-saige-153	Colorectal cancer	Colorectal cancer || ||	TRUE	MedicineITLab	0.0345005	1732	2.20141e-16	MIA	TRUE	reported	finn-pQTL-R10-v1-MIA	2	TRUE	0.0381654	68.6461	195.968	68.7639
rs6508915	T	C	T	C	-0.245924	-0.012	0.811778	0.82	FALSE	FALSE	FALSE	ukb-saige-153	19	40347658	0.028	387318	0.66	Colorectal cancer || id:ukb-saige-153	Colorectal cancer	Colorectal cancer || ||	TRUE	MedicineITLab	0.0431848	1732	1.44931e-08	MIA	TRUE	reported	finn-pQTL-R10-v1-MIA	2	TRUE	0.0184816	32.5752	195.968	32.4295
rs4725103	G	A	G	A	0.225523	-0.014	0.553494	0.48	FALSE	FALSE	FALSE	ukb-saige-153	7	1501108	0.022	387318	0.53	Colorectal cancer || id:ukb-saige-153	Colorectal cancer	Colorectal cancer || ||	TRUE	MedicineITLab	0.0330483	1732	1.22011e-11	MICALL2	TRUE	reported	finn-pQTL-R10-v1-MICALL2	2	TRUE	0.0251392	44.6124	195.968	46.5676
rs5751775	C	T	C	T	-0.232567	-0.022	0.633673	0.59	FALSE	FALSE	FALSE	ukb-saige-153	22	24266726	0.022	387318	0.3	Colorectal cancer || id:ukb-saige-153	Colorectal cancer	Colorectal cancer || ||	TRUE	MedicineITLab	0.0343823	1732	1.82894e-11	MIF	TRUE	reported	finn-pQTL-R10-v1-MIF	2	TRUE	0.0251108	44.5606	195.968	45.7537
rs141384496	T	G	T	G	0.986104	0.15	0.0202543	0.021	FALSE	FALSE	FALSE	ukb-saige-153	17	62513326	0.077	387318	0.058	Colorectal cancer || id:ukb-saige-153	Colorectal cancer	Colorectal cancer || ||	TRUE	MedicineITLab	0.116454	1732	5.26138e-17	MILR1	TRUE	reported	finn-pQTL-R10-v1-MILR1	2	TRUE	0.0385928	69.4456	195.968	71.7029
rs186346374	T	C	T	C	0.572023	0.043	0.0351459	0.018	FALSE	FALSE	FALSE	ukb-saige-153	17	62503017	0.092	387318	0.64	Colorectal cancer || id:ukb-saige-153	Colorectal cancer	Colorectal cancer || ||	TRUE	MedicineITLab	0.0933838	1732	1.11653e-09	MILR1	TRUE	reported	finn-pQTL-R10-v1-MILR1	2	TRUE	0.0221918	39.2632	195.968	37.5218
rs72844239	C	A	C	A	0.525101	0.011	0.101538	0.079	FALSE	FALSE	FALSE	ukb-saige-153	17	62569739	0.043	387318	0.79	Colorectal cancer || id:ukb-saige-153	Colorectal cancer	Colorectal cancer || ||	TRUE	MedicineITLab	0.0560114	1732	2.0893e-20	MILR1	TRUE	reported	finn-pQTL-R10-v1-MILR1	2	TRUE	0.0503088	91.6448	195.968	87.8887
rs4713678	C	T	C	T	0.269605	0.024	0.570417	0.57	FALSE	FALSE	FALSE	ukb-saige-153	6	33742097	0.022	387318	0.28	Colorectal cancer || id:ukb-saige-153	Colorectal cancer	Colorectal cancer || ||	TRUE	MedicineITLab	0.0338617	1732	3.03948e-15	MLN	TRUE	reported	finn-pQTL-R10-v1-MLN	2	TRUE	0.0356226	63.9035	195.968	63.3926
rs534191	T	C	T	C	0.366069	0.00017	0.350402	0.45	FALSE	FALSE	FALSE	ukb-saige-153	11	102671697	0.022	387318	0.99	Colorectal cancer || id:ukb-saige-153	Colorectal cancer	Colorectal cancer || ||	TRUE	MedicineITLab	0.0345757	1732	2.00493e-25	MMP1	TRUE	reported	finn-pQTL-R10-v1-MMP1	2	TRUE	0.0610052	112.396	195.968	112.094
rs486055	T	C	T	C	-0.496779	-0.0067	0.144612	0.16	FALSE	FALSE	FALSE	ukb-saige-153	11	102650424	0.029	387318	0.81	Colorectal cancer || id:ukb-saige-153	Colorectal cancer	Colorectal cancer || ||	TRUE	MedicineITLab	0.0475279	1732	7.71436e-25	MMP10	TRUE	reported	finn-pQTL-R10-v1-MMP10	2	TRUE	0.0610554	112.494	195.968	109.252
rs17368814	G	A	G	A	-0.835202	-0.05	0.186696	0.12	FALSE	FALSE	FALSE	ukb-saige-153	11	102748695	0.032	387318	0.12	Colorectal cancer || id:ukb-saige-153	Colorectal cancer	Colorectal cancer || ||	TRUE	MedicineITLab	0.0384516	1732	1.05682e-92	MMP12	TRUE	reported	finn-pQTL-R10-v1-MMP12	2	TRUE	0.211837	464.976	195.968	471.796
rs1893729	A	G	A	G	0.259094	0.041	0.804159	0.87	FALSE	FALSE	FALSE	ukb-saige-153	11	102335609	0.032	387318	0.19	Colorectal cancer || id:ukb-saige-153	Colorectal cancer	Colorectal cancer || ||	TRUE	MedicineITLab	0.0415895	1732	5.8514e-10	MMP12	TRUE	reported	finn-pQTL-R10-v1-MMP12	2	TRUE	0.0211442	37.3695	195.968	38.8103
rs55885752	A	T	A	T	-0.441164	-0.018	0.144269	0.086	FALSE	TRUE	FALSE	ukb-saige-153	11	102988001	0.04	387318	0.65	Colorectal cancer || id:ukb-saige-153	Colorectal cancer	Colorectal cancer || ||	TRUE	MedicineITLab	0.0467045	1732	1.09926e-20	MMP12	TRUE	reported	finn-pQTL-R10-v1-MMP12	2	TRUE	0.0480552	87.3323	195.968	89.2242
rs76494160	C	G	C	G	-0.295277	-0.017	0.169552	0.12	FALSE	TRUE	FALSE	ukb-saige-153	11	102462610	0.033	387318	0.61	Colorectal cancer || id:ukb-saige-153	Colorectal cancer	Colorectal cancer || ||	TRUE	MedicineITLab	0.0447126	1732	5.31374e-11	MMP12	TRUE	reported	finn-pQTL-R10-v1-MMP12	2	TRUE	0.024553	43.5459	195.968	43.6113
rs659383	A	G	A	G	-0.296133	0.037	0.535562	0.56	FALSE	FALSE	FALSE	ukb-saige-153	11	102831091	0.021	387318	0.088	Colorectal cancer || id:ukb-saige-153	Colorectal cancer	Colorectal cancer || ||	TRUE	MedicineITLab	0.0330047	1732	7.35699e-19	MMP13	TRUE	reported	finn-pQTL-R10-v1-MMP13	2	TRUE	0.0436256	78.9149	195.968	80.5048
rs591058	C	T	C	T	0.607199	0.012	0.576326	0.48	FALSE	FALSE	FALSE	ukb-saige-153	11	102711338	0.021	387318	0.56	Colorectal cancer || id:ukb-saige-153	Colorectal cancer	Colorectal cancer || ||	TRUE	MedicineITLab	0.0311514	1732	1.17923e-76	MMP3	TRUE	reported	finn-pQTL-R10-v1-MMP3	2	TRUE	0.18005	379.884	195.968	379.933
rs11568819	A	G	A	G	0.677732	0.045	0.0709042	0.062	FALSE	FALSE	FALSE	ukb-saige-153	11	102401633	0.044	387318	0.3	Colorectal cancer || id:ukb-saige-153	Colorectal cancer	Colorectal cancer || ||	TRUE	MedicineITLab	0.064449	1732	4.10582e-25	MMP7	TRUE	reported	finn-pQTL-R10-v1-MMP7	2	TRUE	0.0605171	111.439	195.968	110.582
rs2852889	A	G	A	G	0.346763	0.017	0.913665	0.91	FALSE	FALSE	FALSE	ukb-saige-153	11	102156221	0.037	387318	0.64	Colorectal cancer || id:ukb-saige-153	Colorectal cancer	Colorectal cancer || ||	TRUE	MedicineITLab	0.0610661	1732	1.59078e-08	MMP7	TRUE	reported	finn-pQTL-R10-v1-MMP7	2	TRUE	0.0189701	33.4529	195.968	32.2452
rs2406371	C	T	C	T	0.209297	0.0059	0.299017	0.29	FALSE	FALSE	FALSE	ukb-saige-153	5	52237991	0.024	387318	0.81	Colorectal cancer || id:ukb-saige-153	Colorectal cancer	Colorectal cancer || ||	TRUE	MedicineITLab	0.0367653	1732	1.46538e-08	MOCS2	TRUE	reported	finn-pQTL-R10-v1-MOCS2	2	TRUE	0.0183637	32.3635	195.968	32.4078
rs76793186	G	T	G	T	-0.907346	-0.054	0.0185052	0.035	FALSE	FALSE	FALSE	ukb-saige-153	5	52411735	0.058	387318	0.36	Colorectal cancer || id:ukb-saige-153	Colorectal cancer	Colorectal cancer || ||	TRUE	MedicineITLab	0.125649	1732	7.68422e-13	MOCS2	TRUE	reported	finn-pQTL-R10-v1-MOCS2	2	TRUE	0.029906	53.3322	195.968	52.1468
rs139237904	T	C	T	C	-0.622461	-0.047	0.0294412	0.013	FALSE	FALSE	FALSE	ukb-saige-153	17	56998480	0.097	387318	0.63	Colorectal cancer || id:ukb-saige-153	Colorectal cancer	Colorectal cancer || ||	TRUE	MedicineITLab	0.0979662	1732	2.67867e-10	MPO	TRUE	reported	finn-pQTL-R10-v1-MPO	2	TRUE	0.0221428	39.1744	195.968	40.3712
rs75394768	A	C	A	C	-0.565015	0.011	0.0884844	0.062	FALSE	FALSE	FALSE	ukb-saige-153	17	56413635	0.044	387318	0.8	Colorectal cancer || id:ukb-saige-153	Colorectal cancer	Colorectal cancer || ||	TRUE	MedicineITLab	0.0572772	1732	2.27877e-22	MPO	TRUE	reported	finn-pQTL-R10-v1-MPO	2	TRUE	0.0514969	93.9265	195.968	97.3098
rs10793608	G	T	G	T	0.257422	-0.011	0.740969	0.77	FALSE	FALSE	FALSE	ukb-saige-153	10	45733560	0.025	387318	0.65	Colorectal cancer || id:ukb-saige-153	Colorectal cancer	Colorectal cancer || ||	TRUE	MedicineITLab	0.0384928	1732	3.05351e-11	MSMB	TRUE	reported	finn-pQTL-R10-v1-MSMB	2	TRUE	0.0254374	45.1554	195.968	44.7231
rs10993994	G	A	G	A	1.02134	0.0065	0.652943	0.61	FALSE	FALSE	FALSE	ukb-saige-153	10	51549496	0.022	387318	0.77	Colorectal cancer || id:ukb-saige-153	Colorectal cancer	Colorectal cancer || ||	TRUE	MedicineITLab	0.0265558	1732	1e-200	MSMB	TRUE	reported	finn-pQTL-R10-v1-MSMB	2	TRUE	0.472767	1551.28	195.968	1479.18
rs41341748	A	G	A	G	-1.33505	0.0089	0.00490762	0.011	FALSE	FALSE	FALSE	ukb-saige-153	8	16012594	0.1	387318	0.93	Colorectal cancer || id:ukb-saige-153	Colorectal cancer	Colorectal cancer || ||	TRUE	MedicineITLab	0.241661	1732	3.80759e-08	MSR1	TRUE	reported	finn-pQTL-R10-v1-MSR1	2	TRUE	0.0174084	30.6501	195.968	30.5198
rs55846031	T	C	T	C	-0.580332	0.13	0.0369141	0.027	FALSE	FALSE	FALSE	ukb-saige-153	8	10240412	0.066	387318	0.049	Colorectal cancer || id:ukb-saige-153	Colorectal cancer	Colorectal cancer || ||	TRUE	MedicineITLab	0.0879125	1732	5.4063e-11	MSRA	TRUE	reported	finn-pQTL-R10-v1-MSRA	2	TRUE	0.0239464	42.4437	195.968	43.5764
rs11718165	G	A	G	A	-1.02545	-0.035	0.403965	0.29	FALSE	FALSE	FALSE	ukb-saige-153	3	49696797	0.024	387318	0.13	Colorectal cancer || id:ukb-saige-153	Colorectal cancer	Colorectal cancer || ||	TRUE	MedicineITLab	0.0252356	1732	1e-200	MST1	TRUE	reported	finn-pQTL-R10-v1-MST1	2	TRUE	0.506378	1774.7	195.968	1651.21
rs35694819	G	A	G	A	-0.257452	0.036	0.279432	0.25	FALSE	FALSE	FALSE	ukb-saige-153	3	50553156	0.025	387318	0.14	Colorectal cancer || id:ukb-saige-153	Colorectal cancer	Colorectal cancer || ||	TRUE	MedicineITLab	0.0372327	1732	6.57355e-12	MST1	TRUE	reported	finn-pQTL-R10-v1-MST1	2	TRUE	0.0266915	47.4427	195.968	47.8127
rs4287948	T	C	T	C	0.226771	0.0082	0.421413	0.41	FALSE	FALSE	FALSE	ukb-saige-153	3	124722021	0.022	387318	0.71	Colorectal cancer || id:ukb-saige-153	Colorectal cancer	Colorectal cancer || ||	TRUE	MedicineITLab	0.0339318	1732	3.14485e-11	MUC13	TRUE	reported	finn-pQTL-R10-v1-MUC13	2	TRUE	0.0250773	44.4997	195.968	44.6644
rs41420644	C	T	C	T	0.425953	0.037	0.885106	0.89	FALSE	FALSE	FALSE	ukb-saige-153	11	1082819	0.035	387318	0.29	Colorectal cancer || id:ukb-saige-153	Colorectal cancer	Colorectal cancer || ||	TRUE	MedicineITLab	0.0510275	1732	1.40799e-16	MUC2	TRUE	reported	finn-pQTL-R10-v1-MUC2	2	TRUE	0.0369017	66.2859	195.968	69.6811
rs235879	C	T	C	T	0.335178	-0.01	0.599684	0.59	FALSE	FALSE	FALSE	ukb-saige-153	1	171615936	0.022	387318	0.63	Colorectal cancer || id:ukb-saige-153	Colorectal cancer	Colorectal cancer || ||	TRUE	MedicineITLab	0.0338979	1732	1.82852e-22	MYOC	TRUE	reported	finn-pQTL-R10-v1-MYOC	2	TRUE	0.0539394	98.6356	195.968	97.77
rs4859580	C	T	C	T	-0.599231	-0.03	0.283179	0.26	FALSE	FALSE	FALSE	ukb-saige-153	4	76893680	0.024	387318	0.21	Colorectal cancer || id:ukb-saige-153	Colorectal cancer	Colorectal cancer || ||	TRUE	MedicineITLab	0.0347998	1732	1.8681e-61	NAAA	TRUE	reported	finn-pQTL-R10-v1-NAAA	2	TRUE	0.145777	295.233	195.968	296.507
rs79146874	C	T	C	T	-0.328436	0.065	0.0902946	0.05	FALSE	FALSE	FALSE	ukb-saige-153	4	77133048	0.049	387318	0.18	Colorectal cancer || id:ukb-saige-153	Colorectal cancer	Colorectal cancer || ||	TRUE	MedicineITLab	0.0597468	1732	4.43558e-08	NAAA	TRUE	reported	finn-pQTL-R10-v1-NAAA	2	TRUE	0.0177212	31.2108	195.968	30.2185
rs739292	A	G	A	G	0.186588	-0.016	0.532568	0.49	FALSE	FALSE	FALSE	ukb-saige-153	22	42368857	0.021	387318	0.46	Colorectal cancer || id:ukb-saige-153	Colorectal cancer	Colorectal cancer || ||	TRUE	MedicineITLab	0.0331042	1732	2.02395e-08	NAGA	TRUE	reported	finn-pQTL-R10-v1-NAGA	2	TRUE	0.0173337	30.5162	195.968	31.7688
rs2287327	T	C	T	C	-0.379883	0.00033	0.293839	0.33	FALSE	FALSE	FALSE	ukb-saige-153	2	71297982	0.023	387318	0.99	Colorectal cancer || id:ukb-saige-153	Colorectal cancer	Colorectal cancer || ||	TRUE	MedicineITLab	0.0366786	1732	1.97788e-24	NAGK	TRUE	reported	finn-pQTL-R10-v1-NAGK	2	TRUE	0.0598884	110.207	195.968	107.269
rs12599777	G	A	G	A	-0.443846	0.0032	0.136113	0.18	FALSE	FALSE	FALSE	ukb-saige-153	16	5079466	0.028	387318	0.91	Colorectal cancer || id:ukb-saige-153	Colorectal cancer	Colorectal cancer || ||	TRUE	MedicineITLab	0.0488116	1732	2.56803e-19	NAGPA	TRUE	reported	finn-pQTL-R10-v1-NAGPA	2	TRUE	0.0463288	84.0424	195.968	82.6834
rs9657360	T	C	T	C	0.370306	0.049	0.773362	0.8	FALSE	FALSE	FALSE	ukb-saige-153	8	144676862	0.026	387318	0.062	Colorectal cancer || id:ukb-saige-153	Colorectal cancer	Colorectal cancer || ||	TRUE	MedicineITLab	0.0405067	1732	1.67148e-19	NAPRT	TRUE	reported	finn-pQTL-R10-v1-NAPRT	2	TRUE	0.0480692	87.359	195.968	83.5733
rs10891428	A	G	A	G	0.277952	0.013	0.419184	0.51	FALSE	FALSE	FALSE	ukb-saige-153	11	112629520	0.021	387318	0.56	Colorectal cancer || id:ukb-saige-153	Colorectal cancer	Colorectal cancer || ||	TRUE	MedicineITLab	0.0338156	1732	3.9564e-16	NCAM1	TRUE	reported	finn-pQTL-R10-v1-NCAM1	2	TRUE	0.0376195	67.6258	195.968	67.5625
rs11214489	T	C	T	C	-0.401305	0.027	0.241475	0.18	FALSE	FALSE	FALSE	ukb-saige-153	11	112975934	0.028	387318	0.33	Colorectal cancer || id:ukb-saige-153	Colorectal cancer	Colorectal cancer || ||	TRUE	MedicineITLab	0.0386897	1732	1.70098e-24	NCAM1	TRUE	reported	finn-pQTL-R10-v1-NCAM1	2	TRUE	0.0589958	108.462	195.968	107.587
rs2254367	T	A	T	A	0.393066	-0.062	0.0643719	0.062	FALSE	TRUE	FALSE	ukb-saige-153	21	23235115	0.044	387318	0.16	Colorectal cancer || id:ukb-saige-153	Colorectal cancer	Colorectal cancer || ||	TRUE	MedicineITLab	0.0676949	1732	7.57705e-09	NCAM2	TRUE	reported	finn-pQTL-R10-v1-NCAM2	2	TRUE	0.0186106	32.8069	195.968	33.7147
rs2826851	G	A	G	A	0.660324	-0.0083	0.26287	0.28	FALSE	FALSE	FALSE	ukb-saige-153	21	22835946	0.024	387318	0.73	Colorectal cancer || id:ukb-saige-153	Colorectal cancer	Colorectal cancer || ||	TRUE	MedicineITLab	0.0349813	1732	2.04315e-72	NCAM2	TRUE	reported	finn-pQTL-R10-v1-NCAM2	2	TRUE	0.168978	351.773	195.968	356.322
rs6417706	C	T	C	T	0.362491	3.2e-05	0.639362	0.49	FALSE	FALSE	FALSE	ukb-saige-153	21	22381681	0.021	387318	1	Colorectal cancer || id:ukb-saige-153	Colorectal cancer	Colorectal cancer || ||	TRUE	MedicineITLab	0.0349142	1732	1.54206e-24	NCAM2	TRUE	reported	finn-pQTL-R10-v1-NCAM2	2	TRUE	0.0605958	111.593	195.968	107.793
rs11084378	A	G	A	G	-0.40108	0.0031	0.127166	0.044	FALSE	FALSE	FALSE	ukb-saige-153	19	55422582	0.053	387318	0.95	Colorectal cancer || id:ukb-saige-153	Colorectal cancer	Colorectal cancer || ||	TRUE	MedicineITLab	0.0495238	1732	1.03729e-15	NCR1	TRUE	reported	finn-pQTL-R10-v1-NCR1	2	TRUE	0.0357104	64.0668	195.968	65.5895
rs11024268	G	A	G	A	0.372379	-0.026	0.557432	0.62	FALSE	FALSE	FALSE	ukb-saige-153	11	17387982	0.022	387318	0.23	Colorectal cancer || id:ukb-saige-153	Colorectal cancer	Colorectal cancer || ||	TRUE	MedicineITLab	0.0329584	1732	1.30617e-28	NCR3LG1	TRUE	reported	finn-pQTL-R10-v1-NCR3LG1	2	TRUE	0.0684183	127.057	195.968	127.655
rs440277	A	G	A	G	-0.236759	-0.035	0.438532	0.31	FALSE	FALSE	FALSE	ukb-saige-153	19	45361224	0.023	387318	0.13	Colorectal cancer || id:ukb-saige-153	Colorectal cancer	Colorectal cancer || ||	TRUE	MedicineITLab	0.0336312	1732	2.76439e-12	NECTIN2	TRUE	reported	finn-pQTL-R10-v1-NECTIN2	2	TRUE	0.0276038	49.1103	195.968	49.5597
rs35434391	T	G	T	G	-0.42819	0.014	0.140162	0.12	FALSE	FALSE	FALSE	ukb-saige-153	1	161049509	0.034	387318	0.68	Colorectal cancer || id:ukb-saige-153	Colorectal cancer	Colorectal cancer || ||	TRUE	MedicineITLab	0.0482763	1732	1.78855e-18	NECTIN4	TRUE	reported	finn-pQTL-R10-v1-NECTIN4	2	TRUE	0.0441926	79.9882	195.968	78.6693
rs12416881	G	A	G	A	0.360622	0.015	0.150645	0.18	FALSE	FALSE	FALSE	ukb-saige-153	11	21121584	0.028	387318	0.58	Colorectal cancer || id:ukb-saige-153	Colorectal cancer	Colorectal cancer || ||	TRUE	MedicineITLab	0.0479144	1732	8.34449e-14	NELL1	TRUE	reported	finn-pQTL-R10-v1-NELL1	2	TRUE	0.0332796	59.5557	195.968	56.6464
rs143448714	A	G	A	G	-0.952358	-0.011	0.0125209	0.0085	FALSE	FALSE	FALSE	ukb-saige-153	11	21009012	0.12	387318	0.93	Colorectal cancer || id:ukb-saige-153	Colorectal cancer	Colorectal cancer || ||	TRUE	MedicineITLab	0.146883	1732	1.1638e-10	NELL1	TRUE	reported	finn-pQTL-R10-v1-NELL1	2	TRUE	0.0224282	39.6909	195.968	42.0395
rs8176786	T	C	T	C	0.903157	-0.11	0.0557159	0.049	FALSE	FALSE	FALSE	ukb-saige-153	11	20959394	0.049	387318	0.024	Colorectal cancer || id:ukb-saige-153	Colorectal cancer	Colorectal cancer || ||	TRUE	MedicineITLab	0.0705724	1732	6.79047e-36	NELL1	TRUE	reported	finn-pQTL-R10-v1-NELL1	2	TRUE	0.0858298	162.427	195.968	163.778
rs2703043	A	G	A	G	-0.223977	0.025	0.618818	0.6	FALSE	FALSE	FALSE	ukb-saige-153	12	45280870	0.022	387318	0.24	Colorectal cancer || id:ukb-saige-153	Colorectal cancer	Colorectal cancer || ||	TRUE	MedicineITLab	0.034589	1732	1.22897e-10	NELL2	TRUE	reported	finn-pQTL-R10-v1-NELL2	2	TRUE	0.0236664	41.9353	195.968	41.9306
rs60558125	G	A	G	A	0.446635	0.012	0.158829	0.088	FALSE	FALSE	FALSE	ukb-saige-153	1	204803075	0.038	387318	0.74	Colorectal cancer || id:ukb-saige-153	Colorectal cancer	Colorectal cancer || ||	TRUE	MedicineITLab	0.0458549	1732	7.31981e-22	NFASC	TRUE	reported	finn-pQTL-R10-v1-NFASC	2	TRUE	0.0533027	97.4057	195.968	94.8711
rs6663324	C	T	C	T	0.622105	-0.034	0.092664	0.11	FALSE	FALSE	FALSE	ukb-saige-153	1	204946764	0.035	387318	0.32	Colorectal cancer || id:ukb-saige-153	Colorectal cancer	Colorectal cancer || ||	TRUE	MedicineITLab	0.0558294	1732	6.72667e-28	NFASC	TRUE	reported	finn-pQTL-R10-v1-NFASC	2	TRUE	0.0650784	120.422	195.968	124.166
rs41282670	T	G	T	G	-0.616788	-0.051	0.0575907	0.045	FALSE	FALSE	FALSE	ukb-saige-153	6	44275195	0.051	387318	0.32	Colorectal cancer || id:ukb-saige-153	Colorectal cancer	Colorectal cancer || ||	TRUE	MedicineITLab	0.071846	1732	1.99205e-17	NFKBIE	TRUE	reported	finn-pQTL-R10-v1-NFKBIE	2	TRUE	0.0412946	74.5169	195.968	73.6999
rs9603493	C	G	C	G	-1.21128	0.053	0.0102103	0.02	FALSE	TRUE	FALSE	ukb-saige-153	13	39566112	0.078	387318	0.5	Colorectal cancer || id:ukb-saige-153	Colorectal cancer	Colorectal cancer || ||	TRUE	MedicineITLab	0.167993	1732	8.30998e-13	NHLRC3	TRUE	reported	finn-pQTL-R10-v1-NHLRC3	2	TRUE	0.0296552	52.8714	195.968	51.9884
rs6659037	A	T	A	T	-0.716515	-0.042	0.0298781	0.014	FALSE	TRUE	FALSE	ukb-saige-153	1	236275738	0.091	387318	0.64	Colorectal cancer || id:ukb-saige-153	Colorectal cancer	Colorectal cancer || ||	TRUE	MedicineITLab	0.0978938	1732	3.79927e-13	NID1	TRUE	reported	finn-pQTL-R10-v1-NID1	2	TRUE	0.0297618	53.0674	195.968	53.5723
rs2516600	C	T	C	T	0.560856	0.038	0.555604	0.54	FALSE	FALSE	FALSE	ukb-saige-153	14	52487766	0.021	387318	0.079	Colorectal cancer || id:ukb-saige-153	Colorectal cancer	Colorectal cancer || ||	TRUE	MedicineITLab	0.0317593	1732	2.67116e-64	NID2	TRUE	reported	finn-pQTL-R10-v1-NID2	2	TRUE	0.155335	318.148	195.968	311.861
rs4743894	A	C	A	C	0.258825	0.0043	0.55229	0.6	FALSE	FALSE	FALSE	ukb-saige-153	9	95905552	0.022	387318	0.84	Colorectal cancer || id:ukb-saige-153	Colorectal cancer	Colorectal cancer || ||	TRUE	MedicineITLab	0.0340144	1732	4.49987e-14	NINJ1	TRUE	reported	finn-pQTL-R10-v1-NINJ1	2	TRUE	0.0331289	59.2767	195.968	57.9011
rs8055552	G	A	G	A	-0.243157	0.0086	0.220233	0.23	FALSE	FALSE	FALSE	ukb-saige-153	16	1828839	0.025	387318	0.73	Colorectal cancer || id:ukb-saige-153	Colorectal cancer	Colorectal cancer || ||	TRUE	MedicineITLab	0.0412881	1732	4.65029e-09	NME3	TRUE	reported	finn-pQTL-R10-v1-NME3	2	TRUE	0.0203072	35.8597	195.968	34.6836
rs4665150	A	G	A	G	-0.738929	0.036	0.506044	0.48	FALSE	FALSE	FALSE	ukb-saige-153	2	152134149	0.021	387318	0.09	Colorectal cancer || id:ukb-saige-153	Colorectal cancer	Colorectal cancer || ||	TRUE	MedicineITLab	0.028136	1732	3.20627e-128	NMI	TRUE	reported	finn-pQTL-R10-v1-NMI	2	TRUE	0.272968	649.538	195.968	689.733
rs2297516	C	A	C	A	0.198164	0.025	0.352295	0.39	FALSE	FALSE	FALSE	ukb-saige-153	17	26095730	0.022	387318	0.26	Colorectal cancer || id:ukb-saige-153	Colorectal cancer	Colorectal cancer || ||	TRUE	MedicineITLab	0.0351297	1732	1.97201e-08	NOS2	TRUE	reported	finn-pQTL-R10-v1-NOS2	2	TRUE	0.017921	31.5692	195.968	31.82
rs77167138	G	T	G	T	0.489659	-0.039	0.0675114	0.084	FALSE	FALSE	FALSE	ukb-saige-153	1	120487871	0.042	387318	0.36	Colorectal cancer || id:ukb-saige-153	Colorectal cancer	Colorectal cancer || ||	TRUE	MedicineITLab	0.0689975	1732	1.85609e-12	NOTCH2	TRUE	reported	finn-pQTL-R10-v1-NOTCH2	2	TRUE	0.0301883	53.8514	195.968	50.3641
rs33950747	T	C	T	C	-0.87862	-0.0015	0.0818934	0.076	FALSE	FALSE	FALSE	ukb-saige-153	19	36339247	0.04	387318	0.97	Colorectal cancer || id:ukb-saige-153	Colorectal cancer	Colorectal cancer || ||	TRUE	MedicineITLab	0.0592003	1732	5.40256e-47	NPHS1	TRUE	reported	finn-pQTL-R10-v1-NPHS1	2	TRUE	0.116084	227.201	195.968	220.269
rs115134419	A	G	A	G	-0.714276	0.1	0.0187135	0.035	FALSE	FALSE	FALSE	ukb-saige-153	1	182739377	0.058	387318	0.081	Colorectal cancer || id:ukb-saige-153	Colorectal cancer	Colorectal cancer || ||	TRUE	MedicineITLab	0.123998	1732	9.91197e-09	NPL	TRUE	reported	finn-pQTL-R10-v1-NPL	2	TRUE	0.0187376	33.035	195.968	33.182
rs115668314	T	C	T	C	0.611898	-0.088	0.0506261	0.033	FALSE	FALSE	FALSE	ukb-saige-153	1	182770021	0.059	387318	0.14	Colorectal cancer || id:ukb-saige-153	Colorectal cancer	Colorectal cancer || ||	TRUE	MedicineITLab	0.0763923	1732	2.08833e-15	NPL	TRUE	reported	finn-pQTL-R10-v1-NPL	2	TRUE	0.0359915	64.59	195.968	64.1592
rs198389	G	A	G	A	0.279206	-0.022	0.362393	0.42	FALSE	FALSE	FALSE	ukb-saige-153	1	11919271	0.022	387318	0.31	Colorectal cancer || id:ukb-saige-153	Colorectal cancer	Colorectal cancer || ||	TRUE	MedicineITLab	0.0350776	1732	3.09386e-15	NPPB	TRUE	reported	finn-pQTL-R10-v1-NPPB	2	TRUE	0.0360257	64.6536	195.968	63.3563
rs79155262	T	C	T	C	0.763226	-0.0025	0.0674229	0.09	FALSE	FALSE	FALSE	ukb-saige-153	17	78586382	0.037	387318	0.95	Colorectal cancer || id:ukb-saige-153	Colorectal cancer	Colorectal cancer || ||	TRUE	MedicineITLab	0.0653024	1732	1.98701e-30	NPTX1	TRUE	reported	finn-pQTL-R10-v1-NPTX1	2	TRUE	0.0732535	136.746	195.968	136.599
rs13221723	C	T	C	T	0.361255	-0.012	0.684136	0.72	FALSE	FALSE	FALSE	ukb-saige-153	7	98282950	0.024	387318	0.61	Colorectal cancer || id:ukb-saige-153	Colorectal cancer	Colorectal cancer || ||	TRUE	MedicineITLab	0.0353097	1732	6.79204e-24	NPTX2	TRUE	reported	finn-pQTL-R10-v1-NPTX2	2	TRUE	0.0564028	103.409	195.968	104.674
rs62228281	T	C	T	C	0.30581	0.034	0.16804	0.2	FALSE	FALSE	FALSE	ukb-saige-153	22	39501819	0.027	387318	0.21	Colorectal cancer || id:ukb-saige-153	Colorectal cancer	Colorectal cancer || ||	TRUE	MedicineITLab	0.0454619	1732	2.35072e-11	NPTXR	TRUE	reported	finn-pQTL-R10-v1-NPTXR	2	TRUE	0.0261486	46.4517	195.968	45.2489
rs79259527	T	C	T	C	1.80437	0.074	0.0395531	0.019	FALSE	FALSE	FALSE	ukb-saige-153	22	39238700	0.078	387318	0.34	Colorectal cancer || id:ukb-saige-153	Colorectal cancer	Colorectal cancer || ||	TRUE	MedicineITLab	0.0754161	1732	1.59588e-109	NPTXR	TRUE	reported	finn-pQTL-R10-v1-NPTXR	2	TRUE	0.247363	568.585	195.968	572.431
rs62469223	C	T	C	T	0.317888	-0.0026	0.317871	0.31	FALSE	FALSE	FALSE	ukb-saige-153	7	107990269	0.023	387318	0.91	Colorectal cancer || id:ukb-saige-153	Colorectal cancer	Colorectal cancer || ||	TRUE	MedicineITLab	0.035857	1732	1.8531e-18	NRCAM	TRUE	reported	finn-pQTL-R10-v1-NRCAM	2	TRUE	0.0438224	79.2872	195.968	78.596
rs2506150	A	G	A	G	-0.380614	0.017	0.369541	0.36	FALSE	FALSE	FALSE	ukb-saige-153	10	33483308	0.022	387318	0.46	Colorectal cancer || id:ukb-saige-153	Colorectal cancer	Colorectal cancer || ||	TRUE	MedicineITLab	0.0350792	1732	1.3983e-26	NRP1	TRUE	reported	finn-pQTL-R10-v1-NRP1	2	TRUE	0.0675024	125.233	195.968	117.725
rs78625720	A	G	A	G	-1.94624	-0.071	0.0168863	0.031	FALSE	FALSE	FALSE	ukb-saige-153	17	73140941	0.062	387318	0.25	Colorectal cancer || id:ukb-saige-153	Colorectal cancer	Colorectal cancer || ||	TRUE	MedicineITLab	0.122699	1732	5.25654e-53	NT5C	TRUE	reported	finn-pQTL-R10-v1-NT5C	2	TRUE	0.125765	248.874	195.968	251.6
rs28623683	T	C	T	C	-0.243419	0.033	0.288445	0.31	FALSE	FALSE	FALSE	ukb-saige-153	7	33096644	0.023	387318	0.16	Colorectal cancer || id:ukb-saige-153	Colorectal cancer	Colorectal cancer || ||	TRUE	MedicineITLab	0.0378529	1732	1.63953e-10	NT5C3A	TRUE	reported	finn-pQTL-R10-v1-NT5C3A	2	TRUE	0.0243226	43.1271	195.968	41.3533
rs142176850	T	C	T	C	-0.827465	0.025	0.0150965	0.013	FALSE	FALSE	FALSE	ukb-saige-153	6	85394470	0.1	387318	0.8	Colorectal cancer || id:ukb-saige-153	Colorectal cancer	Colorectal cancer || ||	TRUE	MedicineITLab	0.137673	1732	2.25216e-09	NT5E	TRUE	reported	finn-pQTL-R10-v1-NT5E	2	TRUE	0.020361	35.9567	195.968	36.1245
rs7770359	G	A	G	A	-0.493769	-0.00086	0.611431	0.66	FALSE	FALSE	FALSE	ukb-saige-153	6	86195797	0.022	387318	0.97	Colorectal cancer || id:ukb-saige-153	Colorectal cancer	Colorectal cancer || ||	TRUE	MedicineITLab	0.0327763	1732	2.77077e-48	NT5E	TRUE	reported	finn-pQTL-R10-v1-NT5E	2	TRUE	0.115849	226.68	195.968	226.949
rs9944243	G	T	G	T	0.350318	0.0069	0.122338	0.14	FALSE	FALSE	FALSE	ukb-saige-153	15	88514162	0.031	387318	0.82	Colorectal cancer || id:ukb-saige-153	Colorectal cancer	Colorectal cancer || ||	TRUE	MedicineITLab	0.0499611	1732	3.36124e-12	NTRK3	TRUE	reported	finn-pQTL-R10-v1-NTRK3	2	TRUE	0.0263538	46.8262	195.968	49.1656
rs7861760	G	A	G	A	0.325065	0.036	0.181978	0.16	FALSE	FALSE	FALSE	ukb-saige-153	9	34368674	0.029	387318	0.22	Colorectal cancer || id:ukb-saige-153	Colorectal cancer	Colorectal cancer || ||	TRUE	MedicineITLab	0.043491	1732	1.22603e-13	NUDT2	TRUE	reported	finn-pQTL-R10-v1-NUDT2	2	TRUE	0.0314597	56.1931	195.968	55.8652
rs10122535	T	C	T	C	0.206565	-0.011	0.40205	0.4	FALSE	FALSE	FALSE	ukb-saige-153	9	136400563	0.023	387318	0.63	Colorectal cancer || id:ukb-saige-153	Colorectal cancer	Colorectal cancer || ||	TRUE	MedicineITLab	0.0346668	1732	3.07588e-09	OBP2B	TRUE	reported	finn-pQTL-R10-v1-OBP2B	2	TRUE	0.0205158	36.2357	195.968	35.5047
rs3761822	A	G	A	G	0.890853	0.038	0.698309	0.8	FALSE	FALSE	FALSE	ukb-saige-153	9	136085823	0.027	387318	0.16	Colorectal cancer || id:ukb-saige-153	Colorectal cancer	Colorectal cancer || ||	TRUE	MedicineITLab	0.0297236	1732	2.5704e-159	OBP2B	TRUE	reported	finn-pQTL-R10-v1-OBP2B	2	TRUE	0.334389	869.116	195.968	898.275
rs671050	C	T	C	T	-0.282837	0.018	0.694265	0.67	FALSE	FALSE	FALSE	ukb-saige-153	9	136001966	0.023	387318	0.44	Colorectal cancer || id:ukb-saige-153	Colorectal cancer	Colorectal cancer || ||	TRUE	MedicineITLab	0.0358408	1732	5.25412e-15	OBP2B	TRUE	reported	finn-pQTL-R10-v1-OBP2B	2	TRUE	0.0339604	60.8169	195.968	62.2755
rs2044065	T	C	T	C	-0.896392	-0.097	0.0129127	0.024	FALSE	FALSE	FALSE	ukb-saige-153	5	68755613	0.071	387318	0.17	Colorectal cancer || id:ukb-saige-153	Colorectal cancer	Colorectal cancer || ||	TRUE	MedicineITLab	0.15227	1732	4.71791e-09	OCLN	TRUE	reported	finn-pQTL-R10-v1-OCLN	2	TRUE	0.0204832	36.177	195.968	34.6551
rs76153614	C	T	C	T	-0.880953	-0.067	0.0466773	0.053	FALSE	FALSE	FALSE	ukb-saige-153	4	71061318	0.049	387318	0.17	Colorectal cancer || id:ukb-saige-153	Colorectal cancer	Colorectal cancer || ||	TRUE	MedicineITLab	0.0777504	1732	9.29394e-29	ODAM	TRUE	reported	finn-pQTL-R10-v1-ODAM	2	TRUE	0.0690687	128.354	195.968	128.381
rs10453241	A	C	A	C	0.711154	0.013	0.297744	0.36	FALSE	FALSE	FALSE	ukb-saige-153	9	95198887	0.022	387318	0.55	Colorectal cancer || id:ukb-saige-153	Colorectal cancer	Colorectal cancer || ||	TRUE	MedicineITLab	0.0333732	1732	1.16332e-89	OGN	TRUE	reported	finn-pQTL-R10-v1-OGN	2	TRUE	0.211493	464.02	195.968	454.079
rs12683181	T	C	T	C	0.204559	0.013	0.702001	0.74	FALSE	FALSE	FALSE	ukb-saige-153	9	94518328	0.024	387318	0.59	Colorectal cancer || id:ukb-saige-153	Colorectal cancer	Colorectal cancer || ||	TRUE	MedicineITLab	0.0361593	1732	1.79738e-08	OGN	TRUE	reported	finn-pQTL-R10-v1-OGN	2	TRUE	0.0175073	30.8274	195.968	32.0035
rs2296059	G	A	G	A	-0.370748	-0.071	0.14354	0.15	FALSE	FALSE	FALSE	ukb-saige-153	9	95644873	0.03	387318	0.017	Colorectal cancer || id:ukb-saige-153	Colorectal cancer	Colorectal cancer || ||	TRUE	MedicineITLab	0.0485248	1732	3.56451e-14	OGN	TRUE	reported	finn-pQTL-R10-v1-OGN	2	TRUE	0.0337962	60.5125	195.968	58.3754
rs17552047	A	G	A	G	-0.937273	0.013	0.313799	0.28	FALSE	FALSE	FALSE	ukb-saige-153	13	53602462	0.025	387318	0.61	Colorectal cancer || id:ukb-saige-153	Colorectal cancer	Colorectal cancer || ||	TRUE	MedicineITLab	0.0296514	1732	1.75388e-173	OLFM4	TRUE	reported	finn-pQTL-R10-v1-OLFM4	2	TRUE	0.378325	1052.8	195.968	999.176
rs78295368	C	A	C	A	0.444544	-0.054	0.0467351	0.017	FALSE	FALSE	FALSE	ukb-saige-153	13	54279880	0.086	387318	0.52	Colorectal cancer || id:ukb-saige-153	Colorectal cancer	Colorectal cancer || ||	TRUE	MedicineITLab	0.0784989	1732	1.73784e-08	OLFM4	TRUE	reported	finn-pQTL-R10-v1-OLFM4	2	TRUE	0.0176083	31.0083	195.968	32.0703
rs9536335	A	G	A	G	-0.311573	0.019	0.753962	0.72	FALSE	FALSE	FALSE	ukb-saige-153	13	53586474	0.024	387318	0.42	Colorectal cancer || id:ukb-saige-153	Colorectal cancer	Colorectal cancer || ||	TRUE	MedicineITLab	0.0395684	1732	5.99929e-15	OLFM4	TRUE	reported	finn-pQTL-R10-v1-OLFM4	2	TRUE	0.0360165	64.6365	195.968	62.0044
rs2233546	T	C	T	C	-0.370274	-0.041	0.103753	0.054	FALSE	FALSE	FALSE	ukb-saige-153	11	76813961	0.047	387318	0.39	Colorectal cancer || id:ukb-saige-153	Colorectal cancer	Colorectal cancer || ||	TRUE	MedicineITLab	0.055373	1732	3.0662e-11	OMP	TRUE	reported	finn-pQTL-R10-v1-OMP	2	TRUE	0.0254979	45.2656	195.968	44.7147
rs149009092	T	C	T	C	-1.28482	-0.098	0.0184633	0.0068	FALSE	FALSE	FALSE	ukb-saige-153	1	203432545	0.13	387318	0.46	Colorectal cancer || id:ukb-saige-153	Colorectal cancer	Colorectal cancer || ||	TRUE	MedicineITLab	0.125382	1732	5.80096e-24	OPTC	TRUE	reported	finn-pQTL-R10-v1-OPTC	2	TRUE	0.0598316	110.096	195.968	105.006
rs4442925	T	C	T	C	0.509072	0.0086	0.454645	0.45	FALSE	FALSE	FALSE	ukb-saige-153	19	54554950	0.021	387318	0.69	Colorectal cancer || id:ukb-saige-153	Colorectal cancer	Colorectal cancer || ||	TRUE	MedicineITLab	0.0316488	1732	2.32434e-54	OSCAR	TRUE	reported	finn-pQTL-R10-v1-OSCAR	2	TRUE	0.128511	255.108	195.968	258.728
rs357292	G	T	G	T	-0.324648	0.025	0.175239	0.17	FALSE	FALSE	FALSE	ukb-saige-153	5	38923732	0.029	387318	0.37	Colorectal cancer || id:ukb-saige-153	Colorectal cancer	Colorectal cancer || ||	TRUE	MedicineITLab	0.0439666	1732	2.37684e-13	OSMR	TRUE	reported	finn-pQTL-R10-v1-OSMR	2	TRUE	0.0304659	54.3622	195.968	54.523
rs967696	G	A	G	A	-0.669864	-0.028	0.202998	0.28	FALSE	FALSE	FALSE	ukb-saige-153	5	38856662	0.024	387318	0.24	Colorectal cancer || id:ukb-saige-153	Colorectal cancer	Colorectal cancer || ||	TRUE	MedicineITLab	0.0393864	1732	4.19759e-60	OSMR	TRUE	reported	finn-pQTL-R10-v1-OSMR	2	TRUE	0.145196	293.856	195.968	289.255
rs877172	G	T	G	T	0.646672	-0.015	0.314799	0.31	FALSE	FALSE	FALSE	ukb-saige-153	20	3049890	0.025	387318	0.55	Colorectal cancer || id:ukb-saige-153	Colorectal cancer	Colorectal cancer || ||	TRUE	MedicineITLab	0.0342484	1732	1.88062e-72	OXT	TRUE	reported	finn-pQTL-R10-v1-OXT	2	TRUE	0.180405	380.8	195.968	356.523
rs13375202	G	A	G	A	-0.250567	0.0086	0.364382	0.37	FALSE	FALSE	FALSE	ukb-saige-153	1	17651637	0.022	387318	0.7	Colorectal cancer || id:ukb-saige-153	Colorectal cancer	Colorectal cancer || ||	TRUE	MedicineITLab	0.0353674	1732	2.02023e-12	PADI4	TRUE	reported	finn-pQTL-R10-v1-PADI4	2	TRUE	0.0290824	51.8197	195.968	50.1928
rs697449	T	G	T	G	1.04621	-0.049	0.125324	0.19	FALSE	FALSE	FALSE	ukb-saige-153	9	138467959	0.027	387318	0.073	Colorectal cancer || id:ukb-saige-153	Colorectal cancer	Colorectal cancer || ||	TRUE	MedicineITLab	0.0446689	1732	1.33352e-105	PAEP	TRUE	reported	finn-pQTL-R10-v1-PAEP	2	TRUE	0.239966	546.213	195.968	548.564
rs7025199	T	C	T	C	0.266589	-0.013	0.185454	0.2	FALSE	FALSE	FALSE	ukb-saige-153	9	138428228	0.026	387318	0.63	Colorectal cancer || id:ukb-saige-153	Colorectal cancer	Colorectal cancer || ||	TRUE	MedicineITLab	0.0430245	1732	7.21191e-10	PAEP	TRUE	reported	finn-pQTL-R10-v1-PAEP	2	TRUE	0.0214717	37.9611	195.968	38.3931
rs115246607	C	T	C	T	-1.12783	0.034	0.0536442	0.05	FALSE	FALSE	FALSE	ukb-saige-153	5	102461890	0.05	387318	0.5	Colorectal cancer || id:ukb-saige-153	Colorectal cancer	Colorectal cancer || ||	TRUE	MedicineITLab	0.0695828	1732	4.08037e-55	PAM	TRUE	reported	finn-pQTL-R10-v1-PAM	2	TRUE	0.12915	256.565	195.968	262.714
rs12654931	T	A	T	A	0.318261	0.0098	0.249685	0.18	FALSE	TRUE	FALSE	ukb-saige-153	5	101871127	0.028	387318	0.73	Colorectal cancer || id:ukb-saige-153	Colorectal cancer	Colorectal cancer || ||	TRUE	MedicineITLab	0.0385202	1732	2.81061e-16	PAM	TRUE	reported	finn-pQTL-R10-v1-PAM	2	TRUE	0.0379518	68.2468	195.968	68.2637
rs35216474	T	C	T	C	-0.442032	0.001	0.119783	0.16	FALSE	FALSE	FALSE	ukb-saige-153	11	35456153	0.029	387318	0.97	Colorectal cancer || id:ukb-saige-153	Colorectal cancer	Colorectal cancer || ||	TRUE	MedicineITLab	0.0510318	1732	1.04496e-17	PAMR1	TRUE	reported	finn-pQTL-R10-v1-PAMR1	2	TRUE	0.0412024	74.3432	195.968	75.0284
rs61879594	A	G	A	G	-0.446904	-0.057	0.193446	0.18	FALSE	FALSE	FALSE	ukb-saige-153	11	35581348	0.028	387318	0.039	Colorectal cancer || id:ukb-saige-153	Colorectal cancer	Colorectal cancer || ||	TRUE	MedicineITLab	0.0414955	1732	3.17103e-26	PAMR1	TRUE	reported	finn-pQTL-R10-v1-PAMR1	2	TRUE	0.0623235	114.986	195.968	115.992
rs17523802	A	G	A	G	0.335409	-0.0097	0.253687	0.17	FALSE	FALSE	FALSE	ukb-saige-153	1	8021740	0.028	387318	0.73	Colorectal cancer || id:ukb-saige-153	Colorectal cancer	Colorectal cancer || ||	TRUE	MedicineITLab	0.0383123	1732	4.77419e-18	PARK7	TRUE	reported	finn-pQTL-R10-v1-PARK7	2	TRUE	0.0425989	76.9752	195.968	76.6431
rs10870155	C	A	C	A	-0.223048	0.024	0.685614	0.7	FALSE	FALSE	FALSE	ukb-saige-153	9	139882740	0.023	387318	0.31	Colorectal cancer || id:ukb-saige-153	Colorectal cancer	Colorectal cancer || ||	TRUE	MedicineITLab	0.0367038	1732	1.50311e-09	PAXX	TRUE	reported	finn-pQTL-R10-v1-PAXX	2	TRUE	0.0214471	37.9168	195.968	36.9296
rs12265247	G	A	G	A	0.570593	-0.039	0.305014	0.24	FALSE	FALSE	FALSE	ukb-saige-153	10	70038398	0.025	387318	0.12	Colorectal cancer || id:ukb-saige-153	Colorectal cancer	Colorectal cancer || ||	TRUE	MedicineITLab	0.0335257	1732	3.51641e-60	PBLD	TRUE	reported	finn-pQTL-R10-v1-PBLD	2	TRUE	0.138032	277.034	195.968	289.666
rs164074	A	G	A	G	0.373316	-0.032	0.502922	0.53	FALSE	FALSE	FALSE	ukb-saige-153	5	141335284	0.021	387318	0.14	Colorectal cancer || id:ukb-saige-153	Colorectal cancer	Colorectal cancer || ||	TRUE	MedicineITLab	0.0320766	1732	3.40017e-30	PCDH12	TRUE	reported	finn-pQTL-R10-v1-PCDH12	2	TRUE	0.06968	129.575	195.968	135.449
rs186237313	C	T	C	T	0.646099	-0.24	0.0260121	0.0061	FALSE	FALSE	FALSE	ukb-saige-153	13	58261659	0.14	387318	0.084	Colorectal cancer || id:ukb-saige-153	Colorectal cancer	Colorectal cancer || ||	TRUE	MedicineITLab	0.108253	1732	2.90015e-09	PCDH17	TRUE	reported	finn-pQTL-R10-v1-PCDH17	2	TRUE	0.0211523	37.3842	195.968	35.622
rs71427642	A	G	A	G	-0.407827	0.03	0.169161	0.1	FALSE	FALSE	FALSE	ukb-saige-153	13	67786831	0.035	387318	0.39	Colorectal cancer || id:ukb-saige-153	Colorectal cancer	Colorectal cancer || ||	TRUE	MedicineITLab	0.0438459	1732	4.04669e-20	PCDH9	TRUE	reported	finn-pQTL-R10-v1-PCDH9	2	TRUE	0.0467519	84.8475	195.968	86.5155
rs7327811	A	C	A	C	0.250058	0.022	0.543785	0.49	FALSE	FALSE	FALSE	ukb-saige-153	13	67709482	0.021	387318	0.3	Colorectal cancer || id:ukb-saige-153	Colorectal cancer	Colorectal cancer || ||	TRUE	MedicineITLab	0.0339254	1732	2.61517e-13	PCDH9	TRUE	reported	finn-pQTL-R10-v1-PCDH9	2	TRUE	0.0310247	55.3913	195.968	54.329
rs140844203	A	G	A	G	1.15597	0.2	0.00717748	0.01	FALSE	FALSE	FALSE	ukb-saige-153	5	141190732	0.11	387318	0.077	Colorectal cancer || id:ukb-saige-153	Colorectal cancer	Colorectal cancer || ||	TRUE	MedicineITLab	0.194791	1732	3.55435e-09	PCDHB15	TRUE	reported	finn-pQTL-R10-v1-PCDHB15	2	TRUE	0.0190444	33.5864	195.968	35.2172
rs2907302	A	G	A	G	0.451565	-0.0024	0.286923	0.35	FALSE	FALSE	FALSE	ukb-saige-153	5	140621948	0.022	387318	0.91	Colorectal cancer || id:ukb-saige-153	Colorectal cancer	Colorectal cancer || ||	TRUE	MedicineITLab	0.0362304	1732	3.30446e-34	PCDHB15	TRUE	reported	finn-pQTL-R10-v1-PCDHB15	2	TRUE	0.0834396	157.492	195.968	155.344
rs62378372	T	A	T	A	1.01762	0.55	0.056102	0.00092	FALSE	TRUE	FALSE	ukb-saige-153	5	140685928	0.64	387318	0.39	Colorectal cancer || id:ukb-saige-153	Colorectal cancer	Colorectal cancer || ||	TRUE	MedicineITLab	0.0710294	1732	4.45862e-44	PCDHB15	TRUE	reported	finn-pQTL-R10-v1-PCDHB15	2	TRUE	0.109674	213.109	195.968	205.256
rs664082	G	C	G	C	0.555874	-0.034	0.70582	0.77	FALSE	TRUE	FALSE	ukb-saige-153	11	117071070	0.026	387318	0.18	Colorectal cancer || id:ukb-saige-153	Colorectal cancer	Colorectal cancer || ||	TRUE	MedicineITLab	0.0346762	1732	5.0015e-54	PCSK7	TRUE	reported	finn-pQTL-R10-v1-PCSK7	2	TRUE	0.128319	254.67	195.968	256.974
rs114540251	A	G	A	G	-0.390797	-0.043	0.0666746	0.042	FALSE	FALSE	FALSE	ukb-saige-153	1	56414772	0.055	387318	0.44	Colorectal cancer || id:ukb-saige-153	Colorectal cancer	Colorectal cancer || ||	TRUE	MedicineITLab	0.068876	1732	1.63294e-08	PCSK9	TRUE	reported	finn-pQTL-R10-v1-PCSK9	2	TRUE	0.0190075	33.5202	195.968	32.1934
rs11591147	T	G	T	G	-1.2	0.11	0.0370432	0.018	FALSE	FALSE	FALSE	ukb-saige-153	1	55505647	0.081	387318	0.18	Colorectal cancer || id:ukb-saige-153	Colorectal cancer	Colorectal cancer || ||	TRUE	MedicineITLab	0.0840975	1732	9.3519e-44	PCSK9	TRUE	reported	finn-pQTL-R10-v1-PCSK9	2	TRUE	0.102732	198.076	195.968	203.609
rs639750	T	G	T	G	0.282575	0.0074	0.589458	0.67	FALSE	FALSE	FALSE	ukb-saige-153	1	55519015	0.023	387318	0.75	Colorectal cancer || id:ukb-saige-153	Colorectal cancer	Colorectal cancer || ||	TRUE	MedicineITLab	0.0336786	1732	9.93116e-17	PCSK9	TRUE	reported	finn-pQTL-R10-v1-PCSK9	2	TRUE	0.0386463	69.5458	195.968	70.3979
rs74883198	A	G	A	G	-0.353332	0.13	0.0945626	0.037	FALSE	FALSE	FALSE	ukb-saige-153	1	54897103	0.057	387318	0.024	Colorectal cancer || id:ukb-saige-153	Colorectal cancer	Colorectal cancer || ||	TRUE	MedicineITLab	0.0575451	1732	1.0207e-09	PCSK9	TRUE	reported	finn-pQTL-R10-v1-PCSK9	2	TRUE	0.0213783	37.7925	195.968	37.7007
rs2381282	C	T	C	T	0.631727	-0.0024	0.415367	0.44	FALSE	FALSE	FALSE	ukb-saige-153	9	5514839	0.022	387318	0.91	Colorectal cancer || id:ukb-saige-153	Colorectal cancer	Colorectal cancer || ||	TRUE	MedicineITLab	0.0312944	1732	1.52405e-81	PDCD1LG2	TRUE	reported	finn-pQTL-R10-v1-PDCD1LG2	2	TRUE	0.193822	415.929	195.968	407.498
rs10402931	A	G	A	G	0.37583	-0.005	0.771569	0.68	FALSE	FALSE	FALSE	ukb-saige-153	19	33072069	0.023	387318	0.83	Colorectal cancer || id:ukb-saige-153	Colorectal cancer	Colorectal cancer || ||	TRUE	MedicineITLab	0.039	1732	1.91382e-21	PDCD5	TRUE	reported	finn-pQTL-R10-v1-PDCD5	2	TRUE	0.0497901	90.6503	195.968	92.8653
rs10518337	C	A	C	A	-0.229222	-0.0085	0.470446	0.48	FALSE	FALSE	FALSE	ukb-saige-153	4	120574874	0.021	387318	0.69	Colorectal cancer || id:ukb-saige-153	Colorectal cancer	Colorectal cancer || ||	TRUE	MedicineITLab	0.0330013	1732	5.3064e-12	PDE5A	TRUE	reported	finn-pQTL-R10-v1-PDE5A	2	TRUE	0.0261796	46.5082	195.968	48.2448
rs35597368	C	T	C	T	-0.461747	0.049	0.121375	0.11	FALSE	FALSE	FALSE	ukb-saige-153	4	55139771	0.034	387318	0.15	Colorectal cancer || id:ukb-saige-153	Colorectal cancer	Colorectal cancer || ||	TRUE	MedicineITLab	0.0502273	1732	1.0617e-19	PDGFRA	TRUE	reported	finn-pQTL-R10-v1-PDGFRA	2	TRUE	0.0454748	82.4194	195.968	84.514
rs114919633	T	C	T	C	-0.940194	0.081	0.0183116	0.014	FALSE	FALSE	FALSE	ukb-saige-153	5	149364249	0.093	387318	0.39	Colorectal cancer || id:ukb-saige-153	Colorectal cancer	Colorectal cancer || ||	TRUE	MedicineITLab	0.124766	1732	7.78933e-14	PDGFRB	TRUE	reported	finn-pQTL-R10-v1-PDGFRB	2	TRUE	0.0317808	56.7855	195.968	56.7862
rs2240795	G	A	G	A	0.210545	-0.0041	0.371085	0.5	FALSE	FALSE	FALSE	ukb-saige-153	5	149589647	0.021	387318	0.85	Colorectal cancer || id:ukb-saige-153	Colorectal cancer	Colorectal cancer || ||	TRUE	MedicineITLab	0.0346562	1732	1.51894e-09	PDGFRB	TRUE	reported	finn-pQTL-R10-v1-PDGFRB	2	TRUE	0.0206912	36.552	195.968	36.9086
rs30821	G	A	G	A	0.317029	-0.049	0.808837	0.81	FALSE	FALSE	FALSE	ukb-saige-153	5	149278570	0.027	387318	0.073	Colorectal cancer || id:ukb-saige-153	Colorectal cancer	Colorectal cancer || ||	TRUE	MedicineITLab	0.0419666	1732	6.7811e-14	PDGFRB	TRUE	reported	finn-pQTL-R10-v1-PDGFRB	2	TRUE	0.0310808	55.4947	195.968	57.0677
rs3816018	T	C	T	C	1.20081	0.0052	0.597623	0.55	FALSE	FALSE	FALSE	ukb-saige-153	5	149508475	0.021	387318	0.81	Colorectal cancer || id:ukb-saige-153	Colorectal cancer	Colorectal cancer || ||	TRUE	MedicineITLab	0.0185492	1732	1e-200	PDGFRB	TRUE	reported	finn-pQTL-R10-v1-PDGFRB	2	TRUE	0.693488	3914.15	195.968	4190.81
rs3804749	T	C	T	C	-0.255157	0.026	0.616249	0.59	FALSE	FALSE	FALSE	ukb-saige-153	3	122833003	0.022	387318	0.24	Colorectal cancer || id:ukb-saige-153	Colorectal cancer	Colorectal cancer || ||	TRUE	MedicineITLab	0.0346704	1732	2.83923e-13	PDIA5	TRUE	reported	finn-pQTL-R10-v1-PDIA5	2	TRUE	0.0307929	54.9642	195.968	54.1623
rs1986217	T	C	T	C	-0.311285	-0.0013	0.624267	0.55	FALSE	FALSE	FALSE	ukb-saige-153	8	57428022	0.021	387318	0.95	Colorectal cancer || id:ukb-saige-153	Colorectal cancer	Colorectal cancer || ||	TRUE	MedicineITLab	0.0352925	1732	2.73149e-18	PENK	TRUE	reported	finn-pQTL-R10-v1-PENK	2	TRUE	0.0454565	82.3847	195.968	77.795
rs13343443	C	T	C	T	-0.553918	-0.039	0.131873	0.16	FALSE	FALSE	FALSE	ukb-saige-153	19	33886341	0.029	387318	0.18	Colorectal cancer || id:ukb-saige-153	Colorectal cancer	Colorectal cancer || ||	TRUE	MedicineITLab	0.0483	1732	2.13354e-29	PEPD	TRUE	reported	finn-pQTL-R10-v1-PEPD	2	TRUE	0.0702522	130.72	195.968	131.521
rs170629	A	G	A	G	0.236427	0.00016	0.354827	0.36	FALSE	FALSE	FALSE	ukb-saige-153	1	7910391	0.022	387318	0.99	Colorectal cancer || id:ukb-saige-153	Colorectal cancer	Colorectal cancer || ||	TRUE	MedicineITLab	0.0384416	1483	9.9307e-10	PER3	TRUE	reported	finn-pQTL-R10-v1-PER3	2	TRUE	0.0255928	38.8984	195.968	37.8261
rs72864196	G	C	G	C	1.17038	0.041	0.0453199	0.019	FALSE	TRUE	FALSE	ukb-saige-153	1	10278758	0.079	387318	0.6	Colorectal cancer || id:ukb-saige-153	Colorectal cancer	Colorectal cancer || ||	TRUE	MedicineITLab	0.0777636	1732	3.35506e-48	PGD	TRUE	reported	finn-pQTL-R10-v1-PGD	2	TRUE	0.118531	232.632	195.968	226.517
rs1560727	C	T	C	T	-1.19375	0.048	0.207612	0.22	FALSE	FALSE	FALSE	ukb-saige-153	19	15587472	0.025	387318	0.06	Colorectal cancer || id:ukb-saige-153	Colorectal cancer	Colorectal cancer || ||	TRUE	MedicineITLab	0.030597	1732	1e-200	PGLYRP2	TRUE	reported	finn-pQTL-R10-v1-PGLYRP2	2	TRUE	0.468864	1527.17	195.968	1522.19
rs28371490	G	A	G	A	-0.380113	0.014	0.229543	0.14	FALSE	FALSE	FALSE	ukb-saige-153	19	15766609	0.031	387318	0.66	Colorectal cancer || id:ukb-saige-153	Colorectal cancer	Colorectal cancer || ||	TRUE	MedicineITLab	0.0395481	1732	2.41657e-21	PGLYRP2	TRUE	reported	finn-pQTL-R10-v1-PGLYRP2	2	TRUE	0.0511055	93.1743	195.968	92.3792
rs4239627	C	G	C	G	-0.230742	0.037	0.733529	0.74	FALSE	TRUE	FALSE	ukb-saige-153	19	16074673	0.025	387318	0.13	Colorectal cancer || id:ukb-saige-153	Colorectal cancer	Colorectal cancer || ||	TRUE	MedicineITLab	0.0383535	1732	2.17435e-09	PGLYRP2	TRUE	reported	finn-pQTL-R10-v1-PGLYRP2	2	TRUE	0.0208138	36.7732	195.968	36.1946
rs55875314	T	C	T	C	0.253285	0.0062	0.275863	0.31	FALSE	FALSE	FALSE	ukb-saige-153	19	15597911	0.023	387318	0.79	Colorectal cancer || id:ukb-saige-153	Colorectal cancer	Colorectal cancer || ||	TRUE	MedicineITLab	0.0374746	1732	1.89496e-11	PGLYRP2	TRUE	reported	finn-pQTL-R10-v1-PGLYRP2	2	TRUE	0.0256309	45.5078	195.968	45.682
rs12070717	T	C	T	C	0.971041	-0.035	0.0207852	0.056	FALSE	FALSE	FALSE	ukb-saige-153	1	153318451	0.046	387318	0.45	Colorectal cancer || id:ukb-saige-153	Colorectal cancer	Colorectal cancer || ||	TRUE	MedicineITLab	0.118119	1732	3.91742e-16	PGLYRP4	TRUE	reported	finn-pQTL-R10-v1-PGLYRP4	2	TRUE	0.0383829	69.0528	195.968	67.5827
rs9484759	G	A	G	A	0.237029	-0.025	0.191792	0.2	FALSE	FALSE	FALSE	ukb-saige-153	6	143858683	0.027	387318	0.34	Colorectal cancer || id:ukb-saige-153	Colorectal cancer	Colorectal cancer || ||	TRUE	MedicineITLab	0.0421211	1732	2.13098e-08	PHACTR2	TRUE	reported	finn-pQTL-R10-v1-PHACTR2	2	TRUE	0.0174175	30.6665	195.968	31.6668
rs116735771	G	C	G	C	0.478244	-0.058	0.0449611	0.072	FALSE	TRUE	FALSE	ukb-saige-153	5	177659519	0.042	387318	0.17	Colorectal cancer || id:ukb-saige-153	Colorectal cancer	Colorectal cancer || ||	TRUE	MedicineITLab	0.0805359	1732	3.47376e-09	PHYKPL	TRUE	reported	finn-pQTL-R10-v1-PHYKPL	2	TRUE	0.0196421	34.6616	195.968	35.2631
rs62406524	C	G	C	G	-0.566926	0.014	0.105843	0.098	FALSE	TRUE	FALSE	ukb-saige-153	6	36925976	0.037	387318	0.7	Colorectal cancer || id:ukb-saige-153	Colorectal cancer	Colorectal cancer || ||	TRUE	MedicineITLab	0.0548061	1732	2.24492e-24	PI16	TRUE	reported	finn-pQTL-R10-v1-PI16	2	TRUE	0.0608357	112.063	195.968	107.003
rs17424356	G	A	G	A	0.357595	0.058	0.213678	0.21	FALSE	FALSE	FALSE	ukb-saige-153	20	43804190	0.026	387318	0.026	Colorectal cancer || id:ukb-saige-153	Colorectal cancer	Colorectal cancer || ||	TRUE	MedicineITLab	0.0400531	1732	1.08094e-18	PI3	TRUE	reported	finn-pQTL-R10-v1-PI3	2	TRUE	0.0429708	77.6773	195.968	79.7096
rs113812519	G	A	G	A	0.688618	-0.017	0.0258412	0.019	FALSE	FALSE	FALSE	ukb-saige-153	1	207276336	0.079	387318	0.82	Colorectal cancer || id:ukb-saige-153	Colorectal cancer	Colorectal cancer || ||	TRUE	MedicineITLab	0.104999	1732	7.16638e-11	PIGR	TRUE	reported	finn-pQTL-R10-v1-PIGR	2	TRUE	0.0238742	42.3126	195.968	43.0117
rs61856816	C	T	C	T	-0.294614	0.015	0.188766	0.19	FALSE	FALSE	FALSE	ukb-saige-153	10	98477342	0.028	387318	0.58	Colorectal cancer || id:ukb-saige-153	Colorectal cancer	Colorectal cancer || ||	TRUE	MedicineITLab	0.0436722	1732	2.06538e-11	PIK3AP1	TRUE	reported	finn-pQTL-R10-v1-PIK3AP1	2	TRUE	0.0265832	47.2448	195.968	45.5089
rs4618154	G	C	G	C	-0.480005	0.0042	0.199397	0.19	FALSE	TRUE	FALSE	ukb-saige-153	22	31678958	0.027	387318	0.88	Colorectal cancer || id:ukb-saige-153	Colorectal cancer	Colorectal cancer || ||	TRUE	MedicineITLab	0.042031	1732	3.56944e-29	PIK3IP1	TRUE	reported	finn-pQTL-R10-v1-PIK3IP1	2	TRUE	0.0735626	137.369	195.968	130.422
rs12669944	A	G	A	G	-0.276433	0.014	0.286771	0.35	FALSE	FALSE	FALSE	ukb-saige-153	7	100446365	0.023	387318	0.54	Colorectal cancer || id:ukb-saige-153	Colorectal cancer	Colorectal cancer || ||	TRUE	MedicineITLab	0.0376869	1732	3.39156e-13	PILRA	TRUE	reported	finn-pQTL-R10-v1-PILRA	2	TRUE	0.0312589	55.8229	195.968	53.8021
rs1859788	G	A	G	A	1.01062	0.02	0.69702	0.68	FALSE	FALSE	FALSE	ukb-saige-153	7	99971834	0.023	387318	0.37	Colorectal cancer || id:ukb-saige-153	Colorectal cancer	Colorectal cancer || ||	TRUE	MedicineITLab	0.0279384	1732	1e-200	PILRA	TRUE	reported	finn-pQTL-R10-v1-PILRA	2	TRUE	0.431385	1312.48	195.968	1308.5
rs55839153	A	G	A	G	0.270164	0.049	0.203478	0.2	FALSE	FALSE	FALSE	ukb-saige-153	7	99752566	0.027	387318	0.07	Colorectal cancer || id:ukb-saige-153	Colorectal cancer	Colorectal cancer || ||	TRUE	MedicineITLab	0.0420345	1732	1.67629e-10	PILRA	TRUE	reported	finn-pQTL-R10-v1-PILRA	2	TRUE	0.0236592	41.9223	195.968	41.3089
rs10247980	C	T	C	T	0.29838	-0.0072	0.339095	0.31	FALSE	FALSE	FALSE	ukb-saige-153	7	100366284	0.023	387318	0.76	Colorectal cancer || id:ukb-saige-153	Colorectal cancer	Colorectal cancer || ||	TRUE	MedicineITLab	0.0350091	1732	3.33426e-17	PILRB	TRUE	reported	finn-pQTL-R10-v1-PILRB	2	TRUE	0.0399052	71.9055	195.968	72.6403
rs12672776	T	C	T	C	0.386844	-0.0068	0.114906	0.08	FALSE	FALSE	FALSE	ukb-saige-153	7	100653451	0.04	387318	0.86	Colorectal cancer || id:ukb-saige-153	Colorectal cancer	Colorectal cancer || ||	TRUE	MedicineITLab	0.0533495	1732	6.20583e-13	PILRB	TRUE	reported	finn-pQTL-R10-v1-PILRB	2	TRUE	0.0304392	54.3131	195.968	52.5788
rs4729532	G	A	G	A	0.270856	-0.016	0.178995	0.1	FALSE	FALSE	FALSE	ukb-saige-153	7	98978755	0.035	387318	0.64	Colorectal cancer || id:ukb-saige-153	Colorectal cancer	Colorectal cancer || ||	TRUE	MedicineITLab	0.0433939	1732	5.4285e-10	PILRB	TRUE	reported	finn-pQTL-R10-v1-PILRB	2	TRUE	0.0215622	38.1247	195.968	38.9601
rs7384878	T	C	T	C	1.18078	0.018	0.694025	0.68	FALSE	FALSE	FALSE	ukb-saige-153	7	99932049	0.023	387318	0.42	Colorectal cancer || id:ukb-saige-153	Colorectal cancer	Colorectal cancer || ||	TRUE	MedicineITLab	0.023932	1732	1e-200	PILRB	TRUE	reported	finn-pQTL-R10-v1-PILRB	2	TRUE	0.592146	2511.72	195.968	2434.33
rs3213276	T	C	T	C	0.877187	0.026	0.562313	0.59	FALSE	FALSE	FALSE	ukb-saige-153	19	44073794	0.022	387318	0.24	Colorectal cancer || id:ukb-saige-153	Colorectal cancer	Colorectal cancer || ||	TRUE	MedicineITLab	0.027056	1732	1.41906e-180	PINLYP	TRUE	reported	finn-pQTL-R10-v1-PINLYP	2	TRUE	0.378753	1054.72	195.968	1051.13
rs62114101	C	A	C	A	-0.545555	-0.0027	0.0398791	0.057	FALSE	FALSE	FALSE	ukb-saige-153	19	44129883	0.047	387318	0.95	Colorectal cancer || id:ukb-saige-153	Colorectal cancer	Colorectal cancer || ||	TRUE	MedicineITLab	0.0849218	1732	1.70887e-10	PINLYP	TRUE	reported	finn-pQTL-R10-v1-PINLYP	2	TRUE	0.0227918	40.3494	195.968	41.2704
rs112071024	T	C	T	C	0.465733	-0.068	0.0552259	0.11	FALSE	FALSE	FALSE	ukb-saige-153	16	2190262	0.034	387318	0.048	Colorectal cancer || id:ukb-saige-153	Colorectal cancer	Colorectal cancer || ||	TRUE	MedicineITLab	0.0738191	1732	3.55623e-10	PKD1	TRUE	reported	finn-pQTL-R10-v1-PKD1	2	TRUE	0.0226347	40.0649	195.968	39.8049
rs184695141	T	C	T	C	-1.05873	0.15	0.024048	0.0092	FALSE	FALSE	FALSE	ukb-saige-153	16	2130644	0.12	387318	0.24	Colorectal cancer || id:ukb-saige-153	Colorectal cancer	Colorectal cancer || ||	TRUE	MedicineITLab	0.109668	1732	1.63042e-21	PKD1	TRUE	reported	finn-pQTL-R10-v1-PKD1	2	TRUE	0.0526148	96.0788	195.968	93.1989
rs113312468	C	T	C	T	-0.421822	-0.09	0.0846194	0.069	FALSE	FALSE	FALSE	ukb-saige-153	1	155390486	0.043	387318	0.034	Colorectal cancer || id:ukb-saige-153	Colorectal cancer	Colorectal cancer || ||	TRUE	MedicineITLab	0.0596111	1732	2.14338e-12	PKLR	TRUE	reported	finn-pQTL-R10-v1-PKLR	2	TRUE	0.0275651	49.0395	195.968	50.0731
rs12445396	A	G	A	G	-0.390464	0.086	0.154748	0.13	FALSE	FALSE	FALSE	ukb-saige-153	16	68155121	0.032	387318	0.0076	Colorectal cancer || id:ukb-saige-153	Colorectal cancer	Colorectal cancer || ||	TRUE	MedicineITLab	0.0469174	1732	1.72703e-16	PLA2G15	TRUE	reported	finn-pQTL-R10-v1-PLA2G15	2	TRUE	0.0398844	71.8664	195.968	69.2619
rs149201520	T	G	T	G	0.863417	0.057	0.0461362	0.012	FALSE	FALSE	FALSE	ukb-saige-153	16	68282528	0.098	387318	0.56	Colorectal cancer || id:ukb-saige-153	Colorectal cancer	Colorectal cancer || ||	TRUE	MedicineITLab	0.0767678	1732	2.24905e-28	PLA2G15	TRUE	reported	finn-pQTL-R10-v1-PLA2G15	2	TRUE	0.0656144	121.484	195.968	126.498
rs113396977	G	T	G	T	0.43366	0.019	0.0720916	0.042	FALSE	FALSE	FALSE	ukb-saige-153	1	20539573	0.055	387318	0.72	Colorectal cancer || id:ukb-saige-153	Colorectal cancer	Colorectal cancer || ||	TRUE	MedicineITLab	0.0636468	1732	1.31009e-11	PLA2G2A	TRUE	reported	finn-pQTL-R10-v1-PLA2G2A	2	TRUE	0.0251605	44.651	195.968	46.4243
rs11573156	C	G	C	G	0.908672	0.017	0.279712	0.23	FALSE	TRUE	FALSE	ukb-saige-153	1	20306146	0.026	387318	0.51	Colorectal cancer || id:ukb-saige-153	Colorectal cancer	Colorectal cancer || ||	TRUE	MedicineITLab	0.030801	1732	2.69153e-155	PLA2G2A	TRUE	reported	finn-pQTL-R10-v1-PLA2G2A	2	TRUE	0.332707	862.563	195.968	870.331
rs147688021	G	A	G	A	0.67818	-0.12	0.0239461	0.0091	FALSE	FALSE	FALSE	ukb-saige-153	1	20457690	0.12	387318	0.31	Colorectal cancer || id:ukb-saige-153	Colorectal cancer	Colorectal cancer || ||	TRUE	MedicineITLab	0.111061	1732	1.25571e-09	PLA2G2A	TRUE	reported	finn-pQTL-R10-v1-PLA2G2A	2	TRUE	0.0214995	38.0114	195.968	37.2878
rs6683970	A	G	A	G	0.216584	-0.022	0.430397	0.41	FALSE	FALSE	FALSE	ukb-saige-153	1	20606320	0.023	387318	0.34	Colorectal cancer || id:ukb-saige-153	Colorectal cancer	Colorectal cancer || ||	TRUE	MedicineITLab	0.0349713	1732	7.34954e-10	PLA2G2A	TRUE	reported	finn-pQTL-R10-v1-PLA2G2A	2	TRUE	0.0229998	40.7264	195.968	38.3556
rs9651020	T	C	T	C	0.216044	0.015	0.677882	0.6	FALSE	FALSE	FALSE	ukb-saige-153	1	20147978	0.022	387318	0.49	Colorectal cancer || id:ukb-saige-153	Colorectal cancer	Colorectal cancer || ||	TRUE	MedicineITLab	0.0364989	1732	3.89278e-09	PLA2G2A	TRUE	reported	finn-pQTL-R10-v1-PLA2G2A	2	TRUE	0.0203837	35.9976	195.968	35.0368
rs150234796	C	G	C	G	-0.673255	-0.12	0.0195501	0.0064	FALSE	TRUE	FALSE	ukb-saige-153	1	186331814	0.14	387318	0.4	Colorectal cancer || id:ukb-saige-153	Colorectal cancer	Colorectal cancer || ||	TRUE	MedicineITLab	0.119987	1732	2.33749e-08	PLA2G4A	TRUE	reported	finn-pQTL-R10-v1-PLA2G4A	2	TRUE	0.0173766	30.593	195.968	31.4841
rs6923031	T	C	T	C	-0.197125	-0.018	0.344697	0.38	FALSE	FALSE	FALSE	ukb-saige-153	6	46693410	0.022	387318	0.42	Colorectal cancer || id:ukb-saige-153	Colorectal cancer	Colorectal cancer || ||	TRUE	MedicineITLab	0.0353529	1732	2.85154e-08	PLA2G7	TRUE	reported	finn-pQTL-R10-v1-PLA2G7	2	TRUE	0.0175547	30.9123	195.968	31.0909
rs11678098	G	A	G	A	-0.207869	0.0052	0.324639	0.32	FALSE	FALSE	FALSE	ukb-saige-153	2	28876857	0.023	387318	0.82	Colorectal cancer || id:ukb-saige-153	Colorectal cancer	Colorectal cancer || ||	TRUE	MedicineITLab	0.0354386	1732	5.34946e-09	PLB1	TRUE	reported	finn-pQTL-R10-v1-PLB1	2	TRUE	0.0189472	33.4118	195.968	34.4054
rs34725152	G	A	G	A	0.29456	-0.022	0.214887	0.2	FALSE	FALSE	FALSE	ukb-saige-153	2	28674629	0.027	387318	0.42	Colorectal cancer || id:ukb-saige-153	Colorectal cancer	Colorectal cancer || ||	TRUE	MedicineITLab	0.040896	1732	8.77405e-13	PLB1	TRUE	reported	finn-pQTL-R10-v1-PLB1	2	TRUE	0.0292765	52.176	195.968	51.8783
rs79870961	T	C	T	C	-0.549079	0.068	0.039758	0.03	FALSE	FALSE	FALSE	ukb-saige-153	2	28546682	0.062	387318	0.28	Colorectal cancer || id:ukb-saige-153	Colorectal cancer	Colorectal cancer || ||	TRUE	MedicineITLab	0.0866663	1732	3.00836e-10	PLB1	TRUE	reported	finn-pQTL-R10-v1-PLB1	2	TRUE	0.02302	40.7629	195.968	40.1392
rs11751347	T	C	T	C	-0.511202	0.045	0.0861455	0.1	FALSE	FALSE	FALSE	ukb-saige-153	6	161092438	0.035	387318	0.2	Colorectal cancer || id:ukb-saige-153	Colorectal cancer	Colorectal cancer || ||	TRUE	MedicineITLab	0.0587299	1732	7.30971e-18	PLG	TRUE	reported	finn-pQTL-R10-v1-PLG	2	TRUE	0.0411457	74.2366	195.968	75.7646
rs6073958	C	T	C	T	-0.483841	-0.0077	0.176662	0.2	FALSE	FALSE	FALSE	ukb-saige-153	20	44551855	0.027	387318	0.77	Colorectal cancer || id:ukb-saige-153	Colorectal cancer	Colorectal cancer || ||	TRUE	MedicineITLab	0.0422232	1732	2.35342e-29	PLTP	TRUE	reported	finn-pQTL-R10-v1-PLTP	2	TRUE	0.0681015	126.425	195.968	131.312
rs140907835	T	G	T	G	-0.714367	-0.046	0.0825692	0.015	FALSE	FALSE	FALSE	ukb-saige-153	17	37296629	0.089	387318	0.6	Colorectal cancer || id:ukb-saige-153	Colorectal cancer	Colorectal cancer || ||	TRUE	MedicineITLab	0.0599951	1732	1.77787e-31	PLXDC1	TRUE	reported	finn-pQTL-R10-v1-PLXDC1	2	TRUE	0.0773151	144.963	195.968	141.779
rs11547731	C	T	C	T	-0.814266	-0.038	0.57546	0.65	FALSE	FALSE	FALSE	ukb-saige-153	22	50722134	0.022	387318	0.092	Colorectal cancer || id:ukb-saige-153	Colorectal cancer	Colorectal cancer || ||	TRUE	MedicineITLab	0.028407	1732	3.45939e-148	PLXNB2	TRUE	reported	finn-pQTL-R10-v1-PLXNB2	2	TRUE	0.323964	829.034	195.968	821.641
rs34407639	C	T	C	T	0.351391	0.0054	0.268607	0.28	FALSE	FALSE	FALSE	ukb-saige-153	22	50723568	0.024	387318	0.82	Colorectal cancer || id:ukb-saige-153	Colorectal cancer	Colorectal cancer || ||	TRUE	MedicineITLab	0.0370055	1732	6.98715e-21	PLXNB2	TRUE	reported	finn-pQTL-R10-v1-PLXNB2	2	TRUE	0.0485154	88.2112	195.968	90.1672
rs12023503	T	C	T	C	0.418034	0.013	0.135324	0.13	FALSE	FALSE	FALSE	ukb-saige-153	1	205902593	0.032	387318	0.7	Colorectal cancer || id:ukb-saige-153	Colorectal cancer	Colorectal cancer || ||	TRUE	MedicineITLab	0.0489318	1732	2.81773e-17	PM20D1	TRUE	reported	finn-pQTL-R10-v1-PM20D1	2	TRUE	0.0408961	73.767	195.968	72.9862
rs144214963	A	G	A	G	0.730326	0.2	0.0316364	0.009	FALSE	FALSE	FALSE	ukb-saige-153	1	205575271	0.12	387318	0.094	Colorectal cancer || id:ukb-saige-153	Colorectal cancer	Colorectal cancer || ||	TRUE	MedicineITLab	0.0970141	1732	8.24328e-14	PM20D1	TRUE	reported	finn-pQTL-R10-v1-PM20D1	2	TRUE	0.0326805	58.4474	195.968	56.6714
rs80308069	T	C	T	C	0.691338	-0.054	0.061115	0.052	FALSE	FALSE	FALSE	ukb-saige-153	1	205881145	0.049	387318	0.27	Colorectal cancer || id:ukb-saige-153	Colorectal cancer	Colorectal cancer || ||	TRUE	MedicineITLab	0.0685862	1732	2.93359e-23	PM20D1	TRUE	reported	finn-pQTL-R10-v1-PM20D1	2	TRUE	0.0548493	100.396	195.968	101.603
rs34258285	C	A	C	A	-0.586056	-0.093	0.0490762	0.025	FALSE	FALSE	FALSE	ukb-saige-153	16	8906914	0.068	387318	0.17	Colorectal cancer || id:ukb-saige-153	Colorectal cancer	Colorectal cancer || ||	TRUE	MedicineITLab	0.0760306	1732	2.13747e-14	PMM2	TRUE	reported	finn-pQTL-R10-v1-PMM2	2	TRUE	0.0320571	57.2956	195.968	59.4157
rs2915755	G	A	G	A	0.254511	0.025	0.342952	0.39	FALSE	FALSE	FALSE	ukb-saige-153	10	118364020	0.022	387318	0.24	Colorectal cancer || id:ukb-saige-153	Colorectal cancer	Colorectal cancer || ||	TRUE	MedicineITLab	0.035992	1732	2.21871e-12	PNLIPRP1	TRUE	reported	finn-pQTL-R10-v1-PNLIPRP1	2	TRUE	0.0291927	52.0219	195.968	50.0036
rs78986454	A	G	A	G	-0.770449	-0.19	0.0240084	0.0081	FALSE	FALSE	FALSE	ukb-saige-153	10	118018696	0.13	387318	0.12	Colorectal cancer || id:ukb-saige-153	Colorectal cancer	Colorectal cancer || ||	TRUE	MedicineITLab	0.106102	1732	5.76501e-13	PNLIPRP2	TRUE	reported	finn-pQTL-R10-v1-PNLIPRP2	2	TRUE	0.0278181	49.5023	195.968	52.7279
rs3212298	T	C	T	C	-0.672407	-0.021	0.0539408	0.044	FALSE	FALSE	FALSE	ukb-saige-153	7	131193739	0.052	387318	0.68	Colorectal cancer || id:ukb-saige-153	Colorectal cancer	Colorectal cancer || ||	TRUE	MedicineITLab	0.0730021	1732	9.07821e-20	PODXL	TRUE	reported	finn-pQTL-R10-v1-PODXL	2	TRUE	0.0461456	83.694	195.968	84.8386
rs114895876	G	A	G	A	-0.983635	0.14	0.0490061	0.013	FALSE	FALSE	FALSE	ukb-saige-153	3	127352970	0.097	387318	0.16	Colorectal cancer || id:ukb-saige-153	Colorectal cancer	Colorectal cancer || ||	TRUE	MedicineITLab	0.07716	1732	1.21591e-35	PODXL2	TRUE	reported	finn-pQTL-R10-v1-PODXL2	2	TRUE	0.0901832	171.482	195.968	162.511
rs62467322	T	C	T	C	0.457656	0.00018	0.0683942	0.04	FALSE	FALSE	FALSE	ukb-saige-153	7	95363447	0.055	387318	1	Colorectal cancer || id:ukb-saige-153	Colorectal cancer	Colorectal cancer || ||	TRUE	MedicineITLab	0.0669085	1732	1.09471e-11	PON1	TRUE	reported	finn-pQTL-R10-v1-PON1	2	TRUE	0.0266907	47.4411	195.968	46.786
rs142014830	A	G	A	G	0.717719	-0.16	0.0262612	0.012	FALSE	FALSE	FALSE	ukb-saige-153	7	95173492	0.099	387318	0.1	Colorectal cancer || id:ukb-saige-153	Colorectal cancer	Colorectal cancer || ||	TRUE	MedicineITLab	0.105142	1732	1.20254e-11	PON2	TRUE	reported	finn-pQTL-R10-v1-PON2	2	TRUE	0.0263449	46.8098	195.968	46.5968
rs4424789	A	G	A	G	0.274202	0.0077	0.442791	0.37	FALSE	FALSE	FALSE	ukb-saige-153	13	38123841	0.022	387318	0.73	Colorectal cancer || id:ukb-saige-153	Colorectal cancer	Colorectal cancer || ||	TRUE	MedicineITLab	0.0337392	1732	8.28324e-16	POSTN	TRUE	reported	finn-pQTL-R10-v1-POSTN	2	TRUE	0.0371012	66.6582	195.968	66.0498
rs34073905	A	G	A	G	0.352461	0.025	0.13759	0.11	FALSE	FALSE	FALSE	ukb-saige-153	15	75416125	0.034	387318	0.45	Colorectal cancer || id:ukb-saige-153	Colorectal cancer	Colorectal cancer || ||	TRUE	MedicineITLab	0.0491873	1732	1.14104e-12	PPCDC	TRUE	reported	finn-pQTL-R10-v1-PPCDC	2	TRUE	0.0294817	52.5527	195.968	51.3471
rs7172715	G	C	G	C	0.88522	0.058	0.10277	0.064	FALSE	TRUE	FALSE	ukb-saige-153	15	75287375	0.043	387318	0.18	Colorectal cancer || id:ukb-saige-153	Colorectal cancer	Colorectal cancer || ||	TRUE	MedicineITLab	0.0518532	1732	1.64021e-60	PPCDC	TRUE	reported	finn-pQTL-R10-v1-PPCDC	2	TRUE	0.144512	292.237	195.968	291.441
rs112117984	A	G	A	G	-0.506941	-0.036	0.0743956	0.067	FALSE	FALSE	FALSE	ukb-saige-153	10	134994867	0.045	387318	0.42	Colorectal cancer || id:ukb-saige-153	Colorectal cancer	Colorectal cancer || ||	TRUE	MedicineITLab	0.0649678	1732	1.03848e-14	PRAP1	TRUE	reported	finn-pQTL-R10-v1-PRAP1	2	TRUE	0.035393	63.4765	195.968	60.8862
rs138711008	A	G	A	G	-0.401925	-0.0043	0.0673981	0.047	FALSE	FALSE	FALSE	ukb-saige-153	10	134890431	0.054	387318	0.94	Colorectal cancer || id:ukb-saige-153	Colorectal cancer	Colorectal cancer || ||	TRUE	MedicineITLab	0.0661511	1732	1.51328e-09	PRAP1	TRUE	reported	finn-pQTL-R10-v1-PRAP1	2	TRUE	0.0203079	35.8608	195.968	36.9161
rs143674922	A	G	A	G	-1.62134	0.018	0.00916093	0.018	FALSE	FALSE	FALSE	ukb-saige-153	10	135161903	0.083	387318	0.82	Colorectal cancer || id:ukb-saige-153	Colorectal cancer	Colorectal cancer || ||	TRUE	MedicineITLab	0.179452	1732	4.27071e-19	PRAP1	TRUE	reported	finn-pQTL-R10-v1-PRAP1	2	TRUE	0.0477222	86.6969	195.968	81.6303
rs12025523	T	G	T	G	-0.808922	0.085	0.0139497	0.021	FALSE	FALSE	FALSE	ukb-saige-153	1	203376653	0.074	387318	0.25	Colorectal cancer || id:ukb-saige-153	Colorectal cancer	Colorectal cancer || ||	TRUE	MedicineITLab	0.139374	1732	7.6867e-09	PRELP	TRUE	reported	finn-pQTL-R10-v1-PRELP	2	TRUE	0.0180014	31.7134	195.968	33.686
rs74628114	C	T	C	T	0.314787	0.0035	0.0972389	0.074	FALSE	FALSE	FALSE	ukb-saige-153	11	57131570	0.041	387318	0.93	Colorectal cancer || id:ukb-saige-153	Colorectal cancer	Colorectal cancer || ||	TRUE	MedicineITLab	0.0569802	1732	3.80733e-08	PRG3	TRUE	reported	finn-pQTL-R10-v1-PRG3	2	TRUE	0.0173971	30.6298	195.968	30.5201
rs6480581	C	T	C	T	-0.239302	-0.0095	0.231617	0.25	FALSE	FALSE	FALSE	ukb-saige-153	10	53672743	0.025	387318	0.7	Colorectal cancer || id:ukb-saige-153	Colorectal cancer	Colorectal cancer || ||	TRUE	MedicineITLab	0.0397867	1732	2.19518e-09	PRKG1	TRUE	reported	finn-pQTL-R10-v1-PRKG1	2	TRUE	0.0203831	35.9965	195.968	36.1757
rs6052800	A	G	A	G	-0.391844	-0.0052	0.262144	0.26	FALSE	FALSE	FALSE	ukb-saige-153	20	4715699	0.024	387318	0.83	Colorectal cancer || id:ukb-saige-153	Colorectal cancer	Colorectal cancer || ||	TRUE	MedicineITLab	0.0373067	1732	4.64836e-25	PRND	TRUE	reported	finn-pQTL-R10-v1-PRND	2	TRUE	0.0593975	109.247	195.968	110.32
rs867186	G	A	G	A	0.638023	-0.059	0.132254	0.088	FALSE	FALSE	FALSE	ukb-saige-153	20	33764554	0.038	387318	0.12	Colorectal cancer || id:ukb-saige-153	Colorectal cancer	Colorectal cancer || ||	TRUE	MedicineITLab	0.0484185	1732	7.40287e-38	PROCR	TRUE	reported	finn-pQTL-R10-v1-PROCR	2	TRUE	0.0934338	178.3	195.968	173.64
rs1857513	A	G	A	G	0.860035	-0.021	0.15127	0.16	FALSE	FALSE	FALSE	ukb-saige-153	1	110993457	0.029	387318	0.48	Colorectal cancer || id:ukb-saige-153	Colorectal cancer	Colorectal cancer || ||	TRUE	MedicineITLab	0.0438605	1732	1.81468e-77	PROK1	TRUE	reported	finn-pQTL-R10-v1-PROK1	2	TRUE	0.189926	405.608	195.968	384.49
rs6662049	G	A	G	A	0.28443	-0.069	0.683313	0.7	FALSE	FALSE	FALSE	ukb-saige-153	1	110807432	0.024	387318	0.0032	Colorectal cancer || id:ukb-saige-153	Colorectal cancer	Colorectal cancer || ||	TRUE	MedicineITLab	0.0360663	1732	5.4689e-15	PROK1	TRUE	reported	finn-pQTL-R10-v1-PROK1	2	TRUE	0.0350131	62.7705	195.968	62.1939
rs8046218	T	C	T	C	0.274713	0.008	0.270278	0.33	FALSE	FALSE	FALSE	ukb-saige-153	16	2908703	0.023	387318	0.73	Colorectal cancer || id:ukb-saige-153	Colorectal cancer	Colorectal cancer || ||	TRUE	MedicineITLab	0.0377157	1732	4.90795e-13	PRSS22	TRUE	reported	finn-pQTL-R10-v1-PRSS22	2	TRUE	0.0297685	53.0796	195.968	53.0535
rs71386687	T	G	T	G	0.310961	-0.019	0.12077	0.081	FALSE	FALSE	FALSE	ukb-saige-153	16	2767894	0.041	387318	0.64	Colorectal cancer || id:ukb-saige-153	Colorectal cancer	Colorectal cancer || ||	TRUE	MedicineITLab	0.0523712	1732	3.48682e-09	PRSS27	TRUE	reported	finn-pQTL-R10-v1-PRSS27	2	TRUE	0.0205354	36.2711	195.968	35.2555
rs34342863	G	A	G	A	-0.634544	0.012	0.0323066	0.029	FALSE	FALSE	FALSE	ukb-saige-153	10	24855993	0.068	387318	0.86	Colorectal cancer || id:ukb-saige-153	Colorectal cancer	Colorectal cancer || ||	TRUE	MedicineITLab	0.0986184	1732	1.60114e-10	PRTFDC1	TRUE	reported	finn-pQTL-R10-v1-PRTFDC1	2	TRUE	0.0251758	44.6789	195.968	41.4007
rs12901168	G	A	G	A	0.380266	0.074	0.913113	0.96	FALSE	FALSE	FALSE	ukb-saige-153	15	56089901	0.058	387318	0.2	Colorectal cancer || id:ukb-saige-153	Colorectal cancer	Colorectal cancer || ||	TRUE	MedicineITLab	0.0578232	1732	6.36649e-11	PRTG	TRUE	reported	finn-pQTL-R10-v1-PRTG	2	TRUE	0.0229448	40.6267	195.968	43.2485
rs182308464	T	C	T	C	1.02719	0.11	0.0219162	0.017	FALSE	FALSE	FALSE	ukb-saige-153	15	56143715	0.087	387318	0.2	Colorectal cancer || id:ukb-saige-153	Colorectal cancer	Colorectal cancer || ||	TRUE	MedicineITLab	0.113765	1732	4.4978e-19	PRTG	TRUE	reported	finn-pQTL-R10-v1-PRTG	2	TRUE	0.0452348	81.9639	195.968	81.5238
rs2008336	T	C	T	C	0.455313	-0.014	0.686562	0.69	FALSE	FALSE	FALSE	ukb-saige-153	15	56007004	0.023	387318	0.56	Colorectal cancer || id:ukb-saige-153	Colorectal cancer	Colorectal cancer || ||	TRUE	MedicineITLab	0.0356291	1732	8.42364e-36	PRTG	TRUE	reported	finn-pQTL-R10-v1-PRTG	2	TRUE	0.089224	169.479	195.968	163.309
rs13435654	A	C	A	C	-0.543733	0.047	0.146325	0.16	FALSE	FALSE	FALSE	ukb-saige-153	4	7439376	0.029	387318	0.11	Colorectal cancer || id:ukb-saige-153	Colorectal cancer	Colorectal cancer || ||	TRUE	MedicineITLab	0.0464401	1732	1.58526e-30	PSAPL1	TRUE	reported	finn-pQTL-R10-v1-PSAPL1	2	TRUE	0.0738605	137.969	195.968	137.083
rs62277598	T	C	T	C	0.768081	0.038	0.188591	0.19	FALSE	FALSE	FALSE	ukb-saige-153	4	7432385	0.028	387318	0.17	Colorectal cancer || id:ukb-saige-153	Colorectal cancer	Colorectal cancer || ||	TRUE	MedicineITLab	0.0398638	1732	4.23058e-75	PSAPL1	TRUE	reported	finn-pQTL-R10-v1-PSAPL1	2	TRUE	0.180553	381.18	195.968	371.242
rs113739887	A	G	A	G	-0.420981	-0.058	0.0773401	0.081	FALSE	FALSE	FALSE	ukb-saige-153	8	144093177	0.042	387318	0.17	Colorectal cancer || id:ukb-saige-153	Colorectal cancer	Colorectal cancer || ||	TRUE	MedicineITLab	0.0634283	1732	4.26776e-11	PSCA	TRUE	reported	finn-pQTL-R10-v1-PSCA	2	TRUE	0.0252931	44.8925	195.968	44.0513
rs2976384	C	T	C	T	1.15516	0.047	0.503999	0.44	FALSE	FALSE	FALSE	ukb-saige-153	8	143752994	0.021	387318	0.028	Colorectal cancer || id:ukb-saige-153	Colorectal cancer	Colorectal cancer || ||	TRUE	MedicineITLab	0.0203203	1732	1e-200	PSCA	TRUE	reported	finn-pQTL-R10-v1-PSCA	2	TRUE	0.667155	3467.61	195.968	3231.65
rs35210469	T	C	T	C	0.385957	0.029	0.158003	0.15	FALSE	FALSE	FALSE	ukb-saige-153	8	143401039	0.03	387318	0.33	Colorectal cancer || id:ukb-saige-153	Colorectal cancer	Colorectal cancer || ||	TRUE	MedicineITLab	0.046018	1732	1.01976e-16	PSCA	TRUE	reported	finn-pQTL-R10-v1-PSCA	2	TRUE	0.0396354	71.3993	195.968	70.3432
rs372042	C	G	C	G	0.428931	-0.012	0.206074	0.12	FALSE	TRUE	FALSE	ukb-saige-153	8	143903476	0.037	387318	0.74	Colorectal cancer || id:ukb-saige-153	Colorectal cancer	Colorectal cancer || ||	TRUE	MedicineITLab	0.0424891	1732	2.53338e-23	PSCA	TRUE	reported	finn-pQTL-R10-v1-PSCA	2	TRUE	0.0602016	110.82	195.968	101.911
rs2442439	T	C	T	C	-0.215841	-0.025	0.351986	0.29	FALSE	FALSE	FALSE	ukb-saige-153	12	122360952	0.024	387318	0.29	Colorectal cancer || id:ukb-saige-153	Colorectal cancer	Colorectal cancer || ||	TRUE	MedicineITLab	0.0352027	1732	1.07699e-09	PSMD9	TRUE	reported	finn-pQTL-R10-v1-PSMD9	2	TRUE	0.0212524	37.565	195.968	37.5938
rs150037619	T	C	T	C	-0.577465	0.079	0.0280544	0.0057	FALSE	FALSE	FALSE	ukb-saige-153	3	46636386	0.15	387318	0.6	Colorectal cancer || id:ukb-saige-153	Colorectal cancer	Colorectal cancer || ||	TRUE	MedicineITLab	0.104034	1732	3.28647e-08	PTH1R	TRUE	reported	finn-pQTL-R10-v1-PTH1R	2	TRUE	0.0181855	32.0436	195.968	30.8106
rs2288523	A	C	A	C	0.949919	0.016	0.126363	0.13	FALSE	FALSE	FALSE	ukb-saige-153	19	55702910	0.031	387318	0.62	Colorectal cancer || id:ukb-saige-153	Colorectal cancer	Colorectal cancer || ||	TRUE	MedicineITLab	0.0447284	1732	3.90301e-89	PTPRH	TRUE	reported	finn-pQTL-R10-v1-PTPRH	2	TRUE	0.19923	430.42	195.968	451.031
rs45493898	G	A	G	A	-0.895415	0.029	0.0605602	0.047	FALSE	FALSE	FALSE	ukb-saige-153	19	55715359	0.051	387318	0.57	Colorectal cancer || id:ukb-saige-153	Colorectal cancer	Colorectal cancer || ||	TRUE	MedicineITLab	0.06863	1732	3.53183e-37	PTPRH	TRUE	reported	finn-pQTL-R10-v1-PTPRH	2	TRUE	0.0912294	173.671	195.968	170.224
rs55763631	A	C	A	C	0.656438	0.017	0.0848764	0.048	FALSE	FALSE	FALSE	ukb-saige-153	19	5293583	0.053	387318	0.74	Colorectal cancer || id:ukb-saige-153	Colorectal cancer	Colorectal cancer || ||	TRUE	MedicineITLab	0.059108	1732	9.93345e-28	PTPRS	TRUE	reported	finn-pQTL-R10-v1-PTPRS	2	TRUE	0.0669398	124.114	195.968	123.337
rs10891336	A	T	A	T	-0.313833	-0.008	0.262403	0.24	FALSE	TRUE	FALSE	ukb-saige-153	11	112061441	0.025	387318	0.75	Colorectal cancer || id:ukb-saige-153	Colorectal cancer	Colorectal cancer || ||	TRUE	MedicineITLab	0.0374783	1732	1.13737e-16	PTS	TRUE	reported	finn-pQTL-R10-v1-PTS	2	TRUE	0.0381255	68.5714	195.968	70.1193
rs4821544	C	T	C	T	-0.619235	-0.048	0.224648	0.3	FALSE	FALSE	FALSE	ukb-saige-153	22	37258503	0.023	387318	0.037	Colorectal cancer || id:ukb-saige-153	Colorectal cancer	Colorectal cancer || ||	TRUE	MedicineITLab	0.0381058	1732	2.25736e-55	PVALB	TRUE	reported	finn-pQTL-R10-v1-PVALB	2	TRUE	0.13358	266.723	195.968	264.076
rs79237765	A	C	A	C	-0.369637	0.032	0.0855682	0.098	FALSE	FALSE	FALSE	ukb-saige-153	22	37214179	0.036	387318	0.38	Colorectal cancer || id:ukb-saige-153	Colorectal cancer	Colorectal cancer || ||	TRUE	MedicineITLab	0.061872	1732	2.80053e-09	PVALB	TRUE	reported	finn-pQTL-R10-v1-PVALB	2	TRUE	0.0213818	37.7987	195.968	35.6913
rs117282069	A	G	A	G	0.510786	0.068	0.0530171	0.016	FALSE	FALSE	FALSE	ukb-saige-153	19	44937848	0.091	387318	0.45	Colorectal cancer || id:ukb-saige-153	Colorectal cancer	Colorectal cancer || ||	TRUE	MedicineITLab	0.075928	1732	2.34261e-11	PVR	TRUE	reported	finn-pQTL-R10-v1-PVR	2	TRUE	0.0261979	46.5416	195.968	45.2558
rs2301274	C	T	C	T	-0.797733	0.011	0.236132	0.24	FALSE	FALSE	FALSE	ukb-saige-153	19	45146402	0.025	387318	0.65	Colorectal cancer || id:ukb-saige-153	Colorectal cancer	Colorectal cancer || ||	TRUE	MedicineITLab	0.0346603	1732	1.77419e-102	PVR	TRUE	reported	finn-pQTL-R10-v1-PVR	2	TRUE	0.229572	515.504	195.968	529.725
rs1594498	A	G	A	G	-0.627697	-0.015	0.178016	0.15	FALSE	FALSE	FALSE	ukb-saige-153	8	52379291	0.03	387318	0.62	Colorectal cancer || id:ukb-saige-153	Colorectal cancer	Colorectal cancer || ||	TRUE	MedicineITLab	0.0422598	1732	4.61955e-47	PXDNL	TRUE	reported	finn-pQTL-R10-v1-PXDNL	2	TRUE	0.115306	225.479	195.968	220.62
rs4767884	C	T	C	T	0.763654	0.029	0.765537	0.76	FALSE	FALSE	FALSE	ukb-saige-153	12	120661977	0.025	387318	0.26	Colorectal cancer || id:ukb-saige-153	Colorectal cancer	Colorectal cancer || ||	TRUE	MedicineITLab	0.0360329	1732	8.23569e-89	PXN	TRUE	reported	finn-pQTL-R10-v1-PXN	2	TRUE	0.209346	458.061	195.968	449.154
rs76985858	G	C	G	C	-0.820891	0.069	0.018358	0.013	FALSE	TRUE	FALSE	ukb-saige-153	12	120274568	0.096	387318	0.47	Colorectal cancer || id:ukb-saige-153	Colorectal cancer	Colorectal cancer || ||	TRUE	MedicineITLab	0.125918	1732	9.24485e-11	PXN	TRUE	reported	finn-pQTL-R10-v1-PXN	2	TRUE	0.0242873	43.0629	195.968	42.5006
rs918242	A	G	A	G	0.238133	0.0027	0.687852	0.68	FALSE	FALSE	FALSE	ukb-saige-153	17	42054739	0.023	387318	0.91	Colorectal cancer || id:ukb-saige-153	Colorectal cancer	Colorectal cancer || ||	TRUE	MedicineITLab	0.0365068	1732	9.02402e-11	PYY	TRUE	reported	finn-pQTL-R10-v1-PYY	2	TRUE	0.0243514	43.1795	195.968	42.5492
rs10020740	C	T	C	T	-0.328057	0.061	0.232202	0.26	FALSE	FALSE	FALSE	ukb-saige-153	4	17515688	0.025	387318	0.013	Colorectal cancer || id:ukb-saige-153	Colorectal cancer	Colorectal cancer || ||	TRUE	MedicineITLab	0.0397103	1732	2.83139e-16	QDPR	TRUE	reported	finn-pQTL-R10-v1-QDPR	2	TRUE	0.0383744	69.037	195.968	68.2484
rs10189564	A	G	A	G	-1.46044	-0.14	0.0787099	0.0044	FALSE	FALSE	FALSE	ukb-saige-153	2	37581254	0.16	387318	0.4	Colorectal cancer || id:ukb-saige-153	Colorectal cancer	Colorectal cancer || ||	TRUE	MedicineITLab	0.0522172	1732	2.46604e-142	QPCT	TRUE	reported	finn-pQTL-R10-v1-QPCT	2	TRUE	0.309331	774.817	195.968	782.24
rs4233922	A	G	A	G	-0.312273	0.017	0.312773	0.3	FALSE	FALSE	FALSE	ukb-saige-153	2	37604769	0.023	387318	0.47	Colorectal cancer || id:ukb-saige-153	Colorectal cancer	Colorectal cancer || ||	TRUE	MedicineITLab	0.035896	1732	7.61904e-18	QPCT	TRUE	reported	finn-pQTL-R10-v1-QPCT	2	TRUE	0.0419207	75.696	195.968	75.6792
rs711250	C	G	C	G	-0.345496	-0.027	0.14295	0.15	FALSE	TRUE	FALSE	ukb-saige-153	2	36706511	0.03	387318	0.37	Colorectal cancer || id:ukb-saige-153	Colorectal cancer	Colorectal cancer || ||	TRUE	MedicineITLab	0.0489819	1732	2.51246e-12	QPCT	TRUE	reported	finn-pQTL-R10-v1-QPCT	2	TRUE	0.0292487	52.1248	195.968	49.7525
rs78410496	A	G	A	G	-0.448194	0.03	0.044377	0.049	FALSE	FALSE	FALSE	ukb-saige-153	2	36857336	0.05	387318	0.55	Colorectal cancer || id:ukb-saige-153	Colorectal cancer	Colorectal cancer || ||	TRUE	MedicineITLab	0.0817619	1732	4.83348e-08	QPCT	TRUE	reported	finn-pQTL-R10-v1-QPCT	2	TRUE	0.0170375	29.9858	195.968	30.049
rs12371	G	A	G	A	-1.13808	0.044	0.0710196	0.088	FALSE	FALSE	FALSE	ukb-saige-153	1	180163390	0.038	387318	0.24	Colorectal cancer || id:ukb-saige-153	Colorectal cancer	Colorectal cancer || ||	TRUE	MedicineITLab	0.0598414	1732	2.19837e-73	QSOX1	TRUE	reported	finn-pQTL-R10-v1-QSOX1	2	TRUE	0.170907	356.618	195.968	361.695
rs72706712	G	A	G	A	-0.416244	0.045	0.0894127	0.072	FALSE	FALSE	FALSE	ukb-saige-153	1	179567696	0.042	387318	0.28	Colorectal cancer || id:ukb-saige-153	Colorectal cancer	Colorectal cancer || ||	TRUE	MedicineITLab	0.0596708	1732	4.31817e-12	QSOX1	TRUE	reported	finn-pQTL-R10-v1-QSOX1	2	TRUE	0.0282128	50.2252	195.968	48.66
rs138886395	C	G	C	G	-0.963276	-0.11	0.0151916	0.0072	FALSE	TRUE	FALSE	ukb-saige-153	6	36612844	0.13	387318	0.4	Colorectal cancer || id:ukb-saige-153	Colorectal cancer	Colorectal cancer || ||	TRUE	MedicineITLab	0.138964	1732	5.84386e-12	RAB44	TRUE	reported	finn-pQTL-R10-v1-RAB44	2	TRUE	0.0277643	49.4039	195.968	48.0504
rs28417878	T	G	T	G	0.263588	-0.04	0.165071	0.12	FALSE	FALSE	FALSE	ukb-saige-153	6	36737020	0.033	387318	0.23	Colorectal cancer || id:ukb-saige-153	Colorectal cancer	Colorectal cancer || ||	TRUE	MedicineITLab	0.0454185	1732	7.7062e-09	RAB44	TRUE	reported	finn-pQTL-R10-v1-RAB44	2	TRUE	0.0191514	33.7789	195.968	33.6811
rs141956126	C	A	C	A	0.35166	-0.0087	0.0814326	0.012	FALSE	FALSE	FALSE	ukb-saige-153	3	159351033	0.11	387318	0.94	Colorectal cancer || id:ukb-saige-153	Colorectal cancer	Colorectal cancer || ||	TRUE	MedicineITLab	0.0631442	1732	2.96265e-08	RARRES1	TRUE	reported	finn-pQTL-R10-v1-RARRES1	2	TRUE	0.0185006	32.6093	195.968	31.0155
rs6441224	C	T	C	T	0.49266	-0.016	0.510986	0.53	FALSE	FALSE	FALSE	ukb-saige-153	3	158450417	0.021	387318	0.47	Colorectal cancer || id:ukb-saige-153	Colorectal cancer	Colorectal cancer || ||	TRUE	MedicineITLab	0.0319866	1732	2.92887e-50	RARRES1	TRUE	reported	finn-pQTL-R10-v1-RARRES1	2	TRUE	0.121298	238.814	195.968	237.224
rs78550539	A	G	A	G	1.10877	-0.025	0.0311111	0.015	FALSE	FALSE	FALSE	ukb-saige-153	3	157513539	0.087	387318	0.78	Colorectal cancer || id:ukb-saige-153	Colorectal cancer	Colorectal cancer || ||	TRUE	MedicineITLab	0.0951544	1732	2.9181e-30	RARRES1	TRUE	reported	finn-pQTL-R10-v1-RARRES1	2	TRUE	0.0741143	138.481	195.968	135.777
rs3735167	T	C	T	C	0.277248	0.017	0.264264	0.26	FALSE	FALSE	FALSE	ukb-saige-153	7	150039555	0.024	387318	0.49	Colorectal cancer || id:ukb-saige-153	Colorectal cancer	Colorectal cancer || ||	TRUE	MedicineITLab	0.0380665	1732	4.9272e-13	RARRES2	TRUE	reported	finn-pQTL-R10-v1-RARRES2	2	TRUE	0.0298901	53.303	195.968	53.0458
rs56275743	A	G	A	G	-0.434518	0.053	0.0610911	0.038	FALSE	FALSE	FALSE	ukb-saige-153	2	28088643	0.056	387318	0.34	Colorectal cancer || id:ukb-saige-153	Colorectal cancer	Colorectal cancer || ||	TRUE	MedicineITLab	0.0715567	1732	1.546e-09	RBKS	TRUE	reported	finn-pQTL-R10-v1-RBKS	2	TRUE	0.0216594	38.3004	195.968	36.8735
rs1408470	T	C	T	C	-0.198788	0.014	0.504664	0.52	FALSE	FALSE	FALSE	ukb-saige-153	9	36033846	0.021	387318	0.52	Colorectal cancer || id:ukb-saige-153	Colorectal cancer	Colorectal cancer || ||	TRUE	MedicineITLab	0.0339252	1732	5.54332e-09	RECK	TRUE	reported	finn-pQTL-R10-v1-RECK	2	TRUE	0.0197566	34.8678	195.968	34.3349
rs11126696	G	A	G	A	0.323935	-0.017	0.606081	0.62	FALSE	FALSE	FALSE	ukb-saige-153	2	79323888	0.022	387318	0.45	Colorectal cancer || id:ukb-saige-153	Colorectal cancer	Colorectal cancer || ||	TRUE	MedicineITLab	0.0341319	1732	7.31139e-21	REG1A	TRUE	reported	finn-pQTL-R10-v1-REG1A	2	TRUE	0.0501053	91.2544	195.968	90.073
rs11126696	G	A	G	A	0.365132	-0.017	0.606081	0.62	FALSE	FALSE	FALSE	ukb-saige-153	2	79323888	0.022	387318	0.45	Colorectal cancer || id:ukb-saige-153	Colorectal cancer	Colorectal cancer || ||	TRUE	MedicineITLab	0.0338907	1732	3.0493e-26	REG1B	TRUE	reported	finn-pQTL-R10-v1-REG1B	2	TRUE	0.0636601	117.62	195.968	116.075
rs77910881	A	G	A	G	-0.354823	-0.02	0.095783	0.15	FALSE	FALSE	FALSE	ukb-saige-153	2	79366871	0.03	387318	0.51	Colorectal cancer || id:ukb-saige-153	Colorectal cancer	Colorectal cancer || ||	TRUE	MedicineITLab	0.0571822	1732	6.8237e-10	REG1B	TRUE	reported	finn-pQTL-R10-v1-REG1B	2	TRUE	0.0218079	38.5688	195.968	38.5036
rs12988957	T	C	T	C	-0.455758	-0.029	0.083159	0.088	FALSE	FALSE	FALSE	ukb-saige-153	2	79238982	0.038	387318	0.44	Colorectal cancer || id:ukb-saige-153	Colorectal cancer	Colorectal cancer || ||	TRUE	MedicineITLab	0.0610102	1732	1.26386e-13	REG3G	TRUE	reported	finn-pQTL-R10-v1-REG3G	2	TRUE	0.0316739	56.5883	195.968	55.8038
rs7599204	C	T	C	T	-0.510029	0.0087	0.709969	0.75	FALSE	FALSE	FALSE	ukb-saige-153	2	79317147	0.025	387318	0.72	Colorectal cancer || id:ukb-saige-153	Colorectal cancer	Colorectal cancer || ||	TRUE	MedicineITLab	0.0360238	1732	3.86723e-43	REG3G	TRUE	reported	finn-pQTL-R10-v1-REG3G	2	TRUE	0.107128	207.568	195.968	200.452
rs61598511	T	C	T	C	-0.296722	0.033	0.19407	0.14	FALSE	FALSE	FALSE	ukb-saige-153	1	120356172	0.031	387318	0.29	Colorectal cancer || id:ukb-saige-153	Colorectal cancer	Colorectal cancer || ||	TRUE	MedicineITLab	0.0426147	1732	4.71737e-12	REG4	TRUE	reported	finn-pQTL-R10-v1-REG4	2	TRUE	0.0275413	48.9959	195.968	48.482
rs143190269	T	C	T	C	0.412952	-0.052	0.0744872	0.033	FALSE	FALSE	FALSE	ukb-saige-153	11	73260009	0.061	387318	0.39	Colorectal cancer || id:ukb-saige-153	Colorectal cancer	Colorectal cancer || ||	TRUE	MedicineITLab	0.0653895	1732	3.42035e-10	RELT	TRUE	reported	finn-pQTL-R10-v1-RELT	2	TRUE	0.0235122	41.6555	195.968	39.8826
rs876480	G	A	G	A	0.547441	0.04	0.296004	0.21	FALSE	FALSE	FALSE	ukb-saige-153	11	73086303	0.026	387318	0.13	Colorectal cancer || id:ukb-saige-153	Colorectal cancer	Colorectal cancer || ||	TRUE	MedicineITLab	0.0346638	1732	1.3693e-52	RELT	TRUE	reported	finn-pQTL-R10-v1-RELT	2	TRUE	0.124903	246.923	195.968	249.415
rs1473091	G	A	G	A	0.584747	0.077	0.0305699	0.04	FALSE	FALSE	FALSE	ukb-saige-153	1	204358996	0.055	387318	0.16	Colorectal cancer || id:ukb-saige-153	Colorectal cancer	Colorectal cancer || ||	TRUE	MedicineITLab	0.0990636	1732	4.29279e-09	REN	TRUE	reported	finn-pQTL-R10-v1-REN	2	TRUE	0.0202664	35.7861	195.968	34.8424
rs145956876	T	A	T	A	0.445589	0.0032	0.0500214	0.031	FALSE	TRUE	FALSE	ukb-saige-153	10	42894842	0.065	387318	0.96	Colorectal cancer || id:ukb-saige-153	Colorectal cancer	Colorectal cancer || ||	TRUE	MedicineITLab	0.0811855	1732	4.6535e-08	RET	TRUE	reported	finn-pQTL-R10-v1-RET	2	TRUE	0.0188699	33.2727	195.968	30.124
rs3123754	A	G	A	G	-0.481692	-0.035	0.843836	0.83	FALSE	FALSE	FALSE	ukb-saige-153	10	43339011	0.028	387318	0.21	Colorectal cancer || id:ukb-saige-153	Colorectal cancer	Colorectal cancer || ||	TRUE	MedicineITLab	0.0440617	1732	6.01589e-27	RET	TRUE	reported	finn-pQTL-R10-v1-RET	2	TRUE	0.0611516	112.683	195.968	119.513
rs3745368	A	G	A	G	-0.885986	-0.015	0.0235883	0.033	FALSE	FALSE	FALSE	ukb-saige-153	19	7735297	0.061	387318	0.81	Colorectal cancer || id:ukb-saige-153	Colorectal cancer	Colorectal cancer || ||	TRUE	MedicineITLab	0.110885	1732	2.43837e-15	RETN	TRUE	reported	finn-pQTL-R10-v1-RETN	2	TRUE	0.0361587	64.9014	195.968	63.8422
rs10852188	G	A	G	A	-0.285527	0.017	0.598548	0.57	FALSE	FALSE	FALSE	ukb-saige-153	15	93607429	0.022	387318	0.43	Colorectal cancer || id:ukb-saige-153	Colorectal cancer	Colorectal cancer || ||	TRUE	MedicineITLab	0.0330954	1732	1.39605e-17	RGMA	TRUE	reported	finn-pQTL-R10-v1-RGMA	2	TRUE	0.0391793	70.5441	195.968	74.4319
rs6595251	A	C	A	C	0.23253	-0.0046	0.438273	0.54	FALSE	FALSE	FALSE	ukb-saige-153	5	97809255	0.021	387318	0.83	Colorectal cancer || id:ukb-saige-153	Colorectal cancer	Colorectal cancer || ||	TRUE	MedicineITLab	0.0343103	1732	1.67417e-11	RGMB	TRUE	reported	finn-pQTL-R10-v1-RGMB	2	TRUE	0.0266231	47.3176	195.968	45.9313
rs17832106	G	A	G	A	-0.301496	0.0078	0.342627	0.33	FALSE	FALSE	FALSE	ukb-saige-153	8	99109448	0.023	387318	0.73	Colorectal cancer || id:ukb-saige-153	Colorectal cancer	Colorectal cancer || ||	TRUE	MedicineITLab	0.0350499	1732	1.72783e-17	RIDA	TRUE	reported	finn-pQTL-R10-v1-RIDA	2	TRUE	0.0409474	73.8636	195.968	73.9928
rs12885981	C	T	C	T	0.276432	0.014	0.728048	0.7	FALSE	FALSE	FALSE	ukb-saige-153	14	21280748	0.024	387318	0.54	Colorectal cancer || id:ukb-saige-153	Colorectal cancer	Colorectal cancer || ||	TRUE	MedicineITLab	0.0374898	1732	2.56389e-13	RNASE1	TRUE	reported	finn-pQTL-R10-v1-RNASE1	2	TRUE	0.0302593	53.9821	195.968	54.3689
rs1713441	G	A	G	A	0.248641	-0.025	0.565924	0.6	FALSE	FALSE	FALSE	ukb-saige-153	14	20871173	0.022	387318	0.27	Colorectal cancer || id:ukb-saige-153	Colorectal cancer	Colorectal cancer || ||	TRUE	MedicineITLab	0.0332942	1732	1.2844e-13	RNASE10	TRUE	reported	finn-pQTL-R10-v1-RNASE10	2	TRUE	0.0303738	54.1927	195.968	55.771
rs4981223	G	A	G	A	-0.713952	-0.016	0.567901	0.51	FALSE	FALSE	FALSE	ukb-saige-153	14	20971784	0.021	387318	0.47	Colorectal cancer || id:ukb-saige-153	Colorectal cancer	Colorectal cancer || ||	TRUE	MedicineITLab	0.0297609	1732	5.02343e-110	RNASE10	TRUE	reported	finn-pQTL-R10-v1-RNASE10	2	TRUE	0.250163	577.17	195.968	575.501
rs61994232	T	C	T	C	0.308337	0.033	0.102811	0.11	FALSE	FALSE	FALSE	ukb-saige-153	14	21000177	0.035	387318	0.35	Colorectal cancer || id:ukb-saige-153	Colorectal cancer	Colorectal cancer || ||	TRUE	MedicineITLab	0.0559553	1732	4.11917e-08	RNASE10	TRUE	reported	finn-pQTL-R10-v1-RNASE10	2	TRUE	0.017539	30.8841	195.968	30.3647
rs77663518	G	C	G	C	0.842861	0.02	0.0575647	0.052	FALSE	TRUE	FALSE	ukb-saige-153	14	20963797	0.049	387318	0.68	Colorectal cancer || id:ukb-saige-153	Colorectal cancer	Colorectal cancer || ||	TRUE	MedicineITLab	0.0699409	1732	3.57767e-32	RNASE10	TRUE	reported	finn-pQTL-R10-v1-RNASE10	2	TRUE	0.0770814	144.488	195.968	145.228
rs117555265	C	T	C	T	-1.66262	0.12	0.0298869	0.005	FALSE	FALSE	FALSE	ukb-saige-153	14	21391411	0.16	387318	0.44	Colorectal cancer || id:ukb-saige-153	Colorectal cancer	Colorectal cancer || ||	TRUE	MedicineITLab	0.155878	619	1.71375e-24	RNASE3	TRUE	reported	finn-pQTL-R10-v1-RNASE3	2	TRUE	0.160295	117.782	195.968	113.767
rs1888562	T	C	T	C	-0.442581	0.0091	0.488691	0.49	FALSE	FALSE	FALSE	ukb-saige-153	14	21164536	0.022	387318	0.67	Colorectal cancer || id:ukb-saige-153	Colorectal cancer	Colorectal cancer || ||	TRUE	MedicineITLab	0.0551873	619	5.34511e-15	RNASE4	TRUE	reported	finn-pQTL-R10-v1-RNASE4	2	TRUE	0.0978889	66.9512	195.968	64.3143
rs6571358	T	G	T	G	-0.329582	0.048	0.524233	0.57	FALSE	FALSE	FALSE	ukb-saige-153	14	21185967	0.022	387318	0.027	Colorectal cancer || id:ukb-saige-153	Colorectal cancer	Colorectal cancer || ||	TRUE	MedicineITLab	0.0553954	619	4.50545e-09	RNASE6	TRUE	reported	finn-pQTL-R10-v1-RNASE6	2	TRUE	0.0541846	35.3472	195.968	35.3981
rs3756838	A	G	A	G	0.417385	0.025	0.243942	0.21	FALSE	FALSE	FALSE	ukb-saige-153	6	167371251	0.026	387318	0.35	Colorectal cancer || id:ukb-saige-153	Colorectal cancer	Colorectal cancer || ||	TRUE	MedicineITLab	0.0646059	619	2.1186e-10	RNASET2	TRUE	reported	finn-pQTL-R10-v1-RNASET2	2	TRUE	0.0642607	42.3717	195.968	41.7378
rs6686041	C	T	C	T	-0.500632	0.037	0.319063	0.17	FALSE	FALSE	FALSE	ukb-saige-153	1	64613645	0.029	387318	0.19	Colorectal cancer || id:ukb-saige-153	Colorectal cancer	Colorectal cancer || ||	TRUE	MedicineITLab	0.0585701	619	9.87844e-17	ROR1	TRUE	reported	finn-pQTL-R10-v1-ROR1	2	TRUE	0.108906	75.4071	195.968	73.0609
rs78031781	T	C	T	C	1.53045	0.15	0.0210016	0.0078	FALSE	FALSE	FALSE	ukb-saige-153	1	153520513	0.12	387318	0.23	Colorectal cancer || id:ukb-saige-153	Colorectal cancer	Colorectal cancer || ||	TRUE	MedicineITLab	0.190781	619	5.25177e-15	S100A4	TRUE	reported	finn-pQTL-R10-v1-S100A4	2	TRUE	0.0963169	65.7615	195.968	64.3529
rs2468789	G	T	G	T	-1.33824	-0.091	0.974152	0.97	FALSE	FALSE	FALSE	ukb-saige-153	11	18231749	0.068	387318	0.18	Colorectal cancer || id:ukb-saige-153	Colorectal cancer	Colorectal cancer || ||	TRUE	MedicineITLab	0.173461	619	4.88324e-14	SAA4	TRUE	reported	finn-pQTL-R10-v1-SAA4	2	TRUE	0.0901886	61.1625	195.968	59.5202
rs12151182	A	G	A	G	0.489097	0.011	0.249596	0.25	FALSE	FALSE	FALSE	ukb-saige-153	19	36023732	0.025	387318	0.67	Colorectal cancer || id:ukb-saige-153	Colorectal cancer	Colorectal cancer || ||	TRUE	MedicineITLab	0.0614063	619	7.98977e-15	SBSN	TRUE	reported	finn-pQTL-R10-v1-SBSN	2	TRUE	0.0896092	60.7309	195.968	63.4401
rs1320379	A	G	A	G	0.32957	-0.029	0.674475	0.7	FALSE	FALSE	FALSE	ukb-saige-153	8	27810000	0.023	387318	0.21	Colorectal cancer || id:ukb-saige-153	Colorectal cancer	Colorectal cancer || ||	TRUE	MedicineITLab	0.0591284	619	3.72825e-08	SCARA5	TRUE	reported	finn-pQTL-R10-v1-SCARA5	2	TRUE	0.0476953	30.9019	195.968	31.0673
rs6858014	A	C	A	C	0.369262	-0.00019	0.277868	0.2	FALSE	FALSE	FALSE	ukb-saige-153	4	77085729	0.027	387318	0.99	Colorectal cancer || id:ukb-saige-153	Colorectal cancer	Colorectal cancer || ||	TRUE	MedicineITLab	0.060891	619	2.31029e-09	SCARB2	TRUE	reported	finn-pQTL-R10-v1-SCARB2	2	TRUE	0.054721	35.7174	195.968	36.7759
rs2272011	A	G	A	G	-0.658194	0.022	0.657512	0.59	FALSE	FALSE	FALSE	ukb-saige-153	17	1542190	0.022	387318	0.3	Colorectal cancer || id:ukb-saige-153	Colorectal cancer	Colorectal cancer || ||	TRUE	MedicineITLab	0.0551313	619	1.05091e-29	SCARF1	TRUE	reported	finn-pQTL-R10-v1-SCARF1	2	TRUE	0.195113	149.568	195.968	142.532
rs361603	A	C	A	C	-0.385904	0.04	0.216478	0.27	FALSE	FALSE	FALSE	ukb-saige-153	22	20765989	0.024	387318	0.097	Colorectal cancer || id:ukb-saige-153	Colorectal cancer	Colorectal cancer || ||	TRUE	MedicineITLab	0.0679655	619	2.10023e-08	SCARF2	TRUE	reported	finn-pQTL-R10-v1-SCARF2	2	TRUE	0.0505189	32.8286	195.968	32.239
rs35561856	G	A	G	A	-0.684971	0.014	0.154281	0.27	FALSE	FALSE	FALSE	ukb-saige-153	15	51735950	0.024	387318	0.57	Colorectal cancer || id:ukb-saige-153	Colorectal cancer	Colorectal cancer || ||	TRUE	MedicineITLab	0.0706479	619	8.74882e-21	SCG3	TRUE	reported	finn-pQTL-R10-v1-SCG3	2	TRUE	0.122437	86.0835	195.968	94.0039
rs668468	A	G	A	G	-0.694936	0.0069	0.549273	0.63	FALSE	FALSE	FALSE	ukb-saige-153	11	118011776	0.022	387318	0.76	Colorectal cancer || id:ukb-saige-153	Colorectal cancer	Colorectal cancer || ||	TRUE	MedicineITLab	0.0515535	619	1.7463e-36	SCN4B	TRUE	reported	finn-pQTL-R10-v1-SCN4B	2	TRUE	0.239123	193.906	195.968	181.708
rs7209525	G	T	G	T	0.523619	0.0011	0.119548	0.16	FALSE	FALSE	FALSE	ukb-saige-153	17	55064359	0.029	387318	0.97	Colorectal cancer || id:ukb-saige-153	Colorectal cancer	Colorectal cancer || ||	TRUE	MedicineITLab	0.0856721	619	1.74549e-09	SCPEP1	TRUE	reported	finn-pQTL-R10-v1-SCPEP1	2	TRUE	0.0577177	37.7931	195.968	37.3553
rs11655934	A	G	A	G	-0.725292	0.031	0.129241	0.15	FALSE	FALSE	FALSE	ukb-saige-153	17	71587577	0.03	387318	0.31	Colorectal cancer || id:ukb-saige-153	Colorectal cancer	Colorectal cancer || ||	TRUE	MedicineITLab	0.08398	619	4.94822e-17	SDK2	TRUE	reported	finn-pQTL-R10-v1-SDK2	2	TRUE	0.118401	82.8644	195.968	74.5889
rs11499034	C	T	C	T	-2.22475	-0.048	0.0161551	0.014	FALSE	FALSE	FALSE	ukb-saige-153	14	81972441	0.09	387318	0.6	Colorectal cancer || id:ukb-saige-153	Colorectal cancer	Colorectal cancer || ||	TRUE	MedicineITLab	0.209061	619	2.14146e-24	SEL1L	TRUE	reported	finn-pQTL-R10-v1-SEL1L	2	TRUE	0.157336	115.202	195.968	113.244
rs4987360	G	A	G	A	-0.543729	0.00049	0.264136	0.31	FALSE	FALSE	FALSE	ukb-saige-153	1	169664867	0.023	387318	0.98	Colorectal cancer || id:ukb-saige-153	Colorectal cancer	Colorectal cancer || ||	TRUE	MedicineITLab	0.0590729	619	5.27336e-19	SELL	TRUE	reported	finn-pQTL-R10-v1-SELL	2	TRUE	0.114926	80.1172	195.968	84.7205
rs6136	G	T	G	T	-0.593277	-0.0074	0.135703	0.11	FALSE	FALSE	FALSE	ukb-saige-153	1	169563951	0.034	387318	0.83	Colorectal cancer || id:ukb-saige-153	Colorectal cancer	Colorectal cancer || ||	TRUE	MedicineITLab	0.0774502	619	7.22079e-14	SELP	TRUE	reported	finn-pQTL-R10-v1-SELP	2	TRUE	0.0825653	55.5274	195.968	58.6773
rs11114013	T	G	T	G	-1.92986	0.025	0.0298869	0.016	FALSE	FALSE	FALSE	ukb-saige-153	12	109008921	0.085	387318	0.77	Colorectal cancer || id:ukb-saige-153	Colorectal cancer	Colorectal cancer || ||	TRUE	MedicineITLab	0.150804	619	2.00984e-33	SELPLG	TRUE	reported	finn-pQTL-R10-v1-SELPLG	2	TRUE	0.215966	169.955	195.968	163.767
rs80005935	A	T	A	T	-0.611661	0.039	0.0815832	0.028	FALSE	TRUE	FALSE	ukb-saige-153	12	109128181	0.068	387318	0.56	Colorectal cancer || id:ukb-saige-153	Colorectal cancer	Colorectal cancer || ||	TRUE	MedicineITLab	0.0999273	619	1.65347e-09	SELPLG	TRUE	reported	finn-pQTL-R10-v1-SELPLG	2	TRUE	0.056065	36.6467	195.968	37.4674
rs28929474	T	C	T	C	-1.47941	-0.05	0.0210016	0.02	FALSE	FALSE	FALSE	ukb-saige-153	14	94844947	0.075	387318	0.51	Colorectal cancer || id:ukb-saige-153	Colorectal cancer	Colorectal cancer || ||	TRUE	MedicineITLab	0.191433	619	4.44441e-14	SERPINA1	TRUE	reported	finn-pQTL-R10-v1-SERPINA1	2	TRUE	0.0899998	61.0218	195.968	59.7233
rs743208	T	G	T	G	-0.52158	0.0031	0.461228	0.42	FALSE	FALSE	FALSE	ukb-saige-153	14	94912517	0.022	387318	0.89	Colorectal cancer || id:ukb-saige-153	Colorectal cancer	Colorectal cancer || ||	TRUE	MedicineITLab	0.0521965	619	6.81217e-22	SERPINA11	TRUE	reported	finn-pQTL-R10-v1-SERPINA11	2	TRUE	0.135205	96.4638	195.968	99.8525
rs17091005	C	T	C	T	0.783482	0.032	0.21567	0.21	FALSE	FALSE	FALSE	ukb-saige-153	14	94988407	0.026	387318	0.23	Colorectal cancer || id:ukb-saige-153	Colorectal cancer	Colorectal cancer || ||	TRUE	MedicineITLab	0.0641667	619	7.28496e-31	SERPINA12	TRUE	reported	finn-pQTL-R10-v1-SERPINA12	2	TRUE	0.207671	161.717	195.968	149.087
rs5511	T	A	T	A	0.45959	0.0078	0.278675	0.22	FALSE	TRUE	FALSE	ukb-saige-153	14	95033595	0.026	387318	0.76	Colorectal cancer || id:ukb-saige-153	Colorectal cancer	Colorectal cancer || ||	TRUE	MedicineITLab	0.0581665	619	1.27222e-14	SERPINA4	TRUE	reported	finn-pQTL-R10-v1-SERPINA4	2	TRUE	0.0849181	57.2566	195.968	62.4303
rs7492591	T	G	T	G	-0.452679	-0.0089	0.124394	0.099	FALSE	FALSE	FALSE	ukb-saige-153	14	95249335	0.036	387318	0.8	Colorectal cancer || id:ukb-saige-153	Colorectal cancer	Colorectal cancer || ||	TRUE	MedicineITLab	0.0814581	619	4.08185e-08	SERPINA4	TRUE	reported	finn-pQTL-R10-v1-SERPINA4	2	TRUE	0.0446395	28.8295	195.968	30.8825
rs67708903	T	C	T	C	-0.492089	-0.0022	0.399838	0.43	FALSE	FALSE	FALSE	ukb-saige-153	14	94920217	0.022	387318	0.92	Colorectal cancer || id:ukb-saige-153	Colorectal cancer	Colorectal cancer || ||	TRUE	MedicineITLab	0.0547667	619	3.12252e-18	SERPINA9	TRUE	reported	finn-pQTL-R10-v1-SERPINA9	2	TRUE	0.116217	81.1352	195.968	80.7336
rs11874530	A	G	A	G	0.459443	-0.031	0.180937	0.18	FALSE	FALSE	FALSE	ukb-saige-153	18	61640982	0.028	387318	0.27	Colorectal cancer || id:ukb-saige-153	Colorectal cancer	Colorectal cancer || ||	TRUE	MedicineITLab	0.0724756	619	4.45971e-10	SERPINB8	TRUE	reported	finn-pQTL-R10-v1-SERPINB8	2	TRUE	0.0625659	41.1796	195.968	40.1864
rs3826616	G	A	G	A	-0.711946	-0.025	0.493538	0.58	FALSE	FALSE	FALSE	ukb-saige-153	18	61654463	0.022	387318	0.24	Colorectal cancer || id:ukb-saige-153	Colorectal cancer	Colorectal cancer || ||	TRUE	MedicineITLab	0.0508423	619	6.90797e-39	SERPINB8	TRUE	reported	finn-pQTL-R10-v1-SERPINB8	2	TRUE	0.253391	209.403	195.968	196.085
rs13412535	A	G	A	G	-0.503291	0.015	0.197092	0.23	FALSE	FALSE	FALSE	ukb-saige-153	2	224874874	0.025	387318	0.56	Colorectal cancer || id:ukb-saige-153	Colorectal cancer	Colorectal cancer || ||	TRUE	MedicineITLab	0.066384	619	1.25968e-13	SERPINE2	TRUE	reported	finn-pQTL-R10-v1-SERPINE2	2	TRUE	0.0801684	53.7749	195.968	57.4793
rs7220762	T	C	T	C	-0.380521	-0.00038	0.422456	0.35	FALSE	FALSE	FALSE	ukb-saige-153	17	1668248	0.022	387318	0.99	Colorectal cancer || id:ukb-saige-153	Colorectal cancer	Colorectal cancer || ||	TRUE	MedicineITLab	0.0568168	619	4.78325e-11	SERPINF1	TRUE	reported	finn-pQTL-R10-v1-SERPINF1	2	TRUE	0.0706568	46.9097	195.968	44.8543
rs28362944	C	T	C	T	-0.735775	-0.042	0.052504	0.05	FALSE	FALSE	FALSE	ukb-saige-153	11	57365723	0.049	387318	0.39	Colorectal cancer || id:ukb-saige-153	Colorectal cancer	Colorectal cancer || ||	TRUE	MedicineITLab	0.125538	619	7.49582e-09	SERPING1	TRUE	reported	finn-pQTL-R10-v1-SERPING1	2	TRUE	0.0538629	35.1254	195.968	34.351
rs1492027	G	A	G	A	0.483902	-0.037	0.243942	0.22	FALSE	FALSE	FALSE	ukb-saige-153	3	167469955	0.026	387318	0.15	Colorectal cancer || id:ukb-saige-153	Colorectal cancer	Colorectal cancer || ||	TRUE	MedicineITLab	0.0641621	619	1.66511e-13	SERPINI1	TRUE	reported	finn-pQTL-R10-v1-SERPINI1	2	TRUE	0.0863747	58.3316	195.968	56.8798
rs17886395	G	C	G	C	0.857346	-0.049	0.155897	0.13	FALSE	TRUE	FALSE	ukb-saige-153	10	81318663	0.031	387318	0.12	Colorectal cancer || id:ukb-saige-153	Colorectal cancer	Colorectal cancer || ||	TRUE	MedicineITLab	0.0720593	619	1.56555e-29	SFTPA2	TRUE	reported	finn-pQTL-R10-v1-SFTPA2	2	TRUE	0.193453	147.99	195.968	141.557
rs1713356	G	A	G	A	0.616787	-0.034	0.0848142	0.053	FALSE	FALSE	FALSE	ukb-saige-153	10	81426478	0.05	387318	0.5	Colorectal cancer || id:ukb-saige-153	Colorectal cancer	Colorectal cancer || ||	TRUE	MedicineITLab	0.0984094	619	6.889e-10	SFTPD	TRUE	reported	finn-pQTL-R10-v1-SFTPD	2	TRUE	0.0590579	38.7258	195.968	39.2823
rs721917	G	A	G	A	-0.686424	-0.034	0.455574	0.42	FALSE	FALSE	FALSE	ukb-saige-153	10	81706324	0.022	387318	0.12	Colorectal cancer || id:ukb-saige-153	Colorectal cancer	Colorectal cancer || ||	TRUE	MedicineITLab	0.0494365	619	2.43068e-38	SFTPD	TRUE	reported	finn-pQTL-R10-v1-SFTPD	2	TRUE	0.233729	188.198	195.968	192.792
rs6565646	C	T	C	T	0.858768	-0.0061	0.648627	0.67	FALSE	FALSE	FALSE	ukb-saige-153	17	78181132	0.023	387318	0.79	Colorectal cancer || id:ukb-saige-153	Colorectal cancer	Colorectal cancer || ||	TRUE	MedicineITLab	0.0491424	619	7.47738e-56	SGSH	TRUE	reported	finn-pQTL-R10-v1-SGSH	2	TRUE	0.336159	312.44	195.968	305.379
rs56046505	T	C	T	C	-0.330675	-0.041	0.436187	0.51	FALSE	FALSE	FALSE	ukb-saige-153	9	131796816	0.021	387318	0.057	Colorectal cancer || id:ukb-saige-153	Colorectal cancer	Colorectal cancer || ||	TRUE	MedicineITLab	0.0542439	619	1.91643e-09	SH3GLB2	TRUE	reported	finn-pQTL-R10-v1-SH3GLB2	2	TRUE	0.0537824	35.0699	195.968	37.1622
rs681998	G	A	G	A	0.451255	0.0066	0.398223	0.39	FALSE	FALSE	FALSE	ukb-saige-153	17	18264449	0.022	387318	0.76	Colorectal cancer || id:ukb-saige-153	Colorectal cancer	Colorectal cancer || ||	TRUE	MedicineITLab	0.0540066	619	4.31466e-16	SHMT1	TRUE	reported	finn-pQTL-R10-v1-SHMT1	2	TRUE	0.0975969	66.7299	195.968	69.8153
rs148783636	C	T	C	T	-1.38023	-0.11	0.0169628	0.02	FALSE	FALSE	FALSE	ukb-saige-153	19	51910979	0.082	387318	0.2	Colorectal cancer || id:ukb-saige-153	Colorectal cancer	Colorectal cancer || ||	TRUE	MedicineITLab	0.215081	619	2.76634e-10	SIGLEC10	TRUE	reported	finn-pQTL-R10-v1-SIGLEC10	2	TRUE	0.0635332	41.8594	195.968	41.1812
rs113349196	G	A	G	A	-1.12675	0.03	0.15832	0.11	FALSE	FALSE	FALSE	ukb-saige-153	19	52151087	0.035	387318	0.4	Colorectal cancer || id:ukb-saige-153	Colorectal cancer	Colorectal cancer || ||	TRUE	MedicineITLab	0.0660489	619	9.60928e-54	SIGLEC5	TRUE	reported	finn-pQTL-R10-v1-SIGLEC5	2	TRUE	0.338351	315.519	195.968	291.021
rs62617068	A	C	A	C	-1.85605	-0.12	0.0088853	0.012	FALSE	FALSE	FALSE	ukb-saige-153	19	52034549	0.099	387318	0.24	Colorectal cancer || id:ukb-saige-153	Colorectal cancer	Colorectal cancer || ||	TRUE	MedicineITLab	0.295087	619	6.02059e-10	SIGLEC6	TRUE	reported	finn-pQTL-R10-v1-SIGLEC6	2	TRUE	0.0606744	39.8542	195.968	39.5621
rs77332639	T	C	T	C	-0.782627	0.25	0.042811	0.0007	FALSE	FALSE	FALSE	ukb-saige-153	19	51955172	0.45	387318	0.58	Colorectal cancer || id:ukb-saige-153	Colorectal cancer	Colorectal cancer || ||	TRUE	MedicineITLab	0.134501	619	9.52937e-09	SIGLEC8	TRUE	reported	finn-pQTL-R10-v1-SIGLEC8	2	TRUE	0.0501987	32.6096	195.968	33.8578
rs2673908	G	T	G	T	-0.711497	0.014	0.605816	0.56	FALSE	FALSE	FALSE	ukb-saige-153	19	51627766	0.021	387318	0.5	Colorectal cancer || id:ukb-saige-153	Colorectal cancer	Colorectal cancer || ||	TRUE	MedicineITLab	0.052093	619	2.68232e-37	SIGLEC9	TRUE	reported	finn-pQTL-R10-v1-SIGLEC9	2	TRUE	0.241777	196.745	195.968	186.547
rs6045331	G	C	G	C	-1.18288	0.0028	0.371567	0.38	FALSE	TRUE	FALSE	ukb-saige-153	20	1885099	0.022	387318	0.9	Colorectal cancer || id:ukb-saige-153	Colorectal cancer	Colorectal cancer || ||	TRUE	MedicineITLab	0.034735	619	7.87044e-144	SIRPA	TRUE	reported	finn-pQTL-R10-v1-SIRPA	2	TRUE	0.653443	1163.37	195.968	1159.7
rs11581248	T	C	T	C	-0.999166	0.046	0.102585	0.14	FALSE	FALSE	FALSE	ukb-saige-153	1	160720074	0.032	387318	0.15	Colorectal cancer || id:ukb-saige-153	Colorectal cancer	Colorectal cancer || ||	TRUE	MedicineITLab	0.0833238	619	6.27689e-30	SLAMF7	TRUE	reported	finn-pQTL-R10-v1-SLAMF7	2	TRUE	0.183816	138.957	195.968	143.793
rs34687326	A	G	A	G	-1.27868	-0.026	0.134895	0.12	FALSE	FALSE	FALSE	ukb-saige-153	1	159799910	0.033	387318	0.43	Colorectal cancer || id:ukb-saige-153	Colorectal cancer	Colorectal cancer || ||	TRUE	MedicineITLab	0.0634569	619	9.07424e-70	SLAMF8	TRUE	reported	finn-pQTL-R10-v1-SLAMF8	2	TRUE	0.381609	380.75	195.968	406.037
rs2717600	G	A	G	A	0.391582	0.0036	0.608239	0.54	FALSE	FALSE	FALSE	ukb-saige-153	8	143813988	0.021	387318	0.87	Colorectal cancer || id:ukb-saige-153	Colorectal cancer	Colorectal cancer || ||	TRUE	MedicineITLab	0.0556765	619	5.37773e-12	SLURP1	TRUE	reported	finn-pQTL-R10-v1-SLURP1	2	TRUE	0.0730753	48.642	195.968	49.4654
rs56296467	C	T	C	T	-0.418583	0.016	0.304523	0.28	FALSE	FALSE	FALSE	ukb-saige-153	6	168863807	0.024	387318	0.51	Colorectal cancer || id:ukb-saige-153	Colorectal cancer	Colorectal cancer || ||	TRUE	MedicineITLab	0.0600469	619	8.11528e-12	SMOC2	TRUE	reported	finn-pQTL-R10-v1-SMOC2	2	TRUE	0.0742157	49.462	195.968	48.5939
rs1050239	A	G	A	G	-0.50325	-0.038	0.23021	0.24	FALSE	FALSE	FALSE	ukb-saige-153	11	6415463	0.025	387318	0.12	Colorectal cancer || id:ukb-saige-153	Colorectal cancer	Colorectal cancer || ||	TRUE	MedicineITLab	0.0640597	619	1.76882e-14	SMPD1	TRUE	reported	finn-pQTL-R10-v1-SMPD1	2	TRUE	0.0897623	60.8449	195.968	61.716
rs13192569	A	G	A	G	-0.982045	-0.0024	0.184976	0.14	FALSE	FALSE	FALSE	ukb-saige-153	6	123127597	0.031	387318	0.94	Colorectal cancer || id:ukb-saige-153	Colorectal cancer	Colorectal cancer || ||	TRUE	MedicineITLab	0.0617357	619	5.34736e-48	SMPDL3A	TRUE	reported	finn-pQTL-R10-v1-SMPDL3A	2	TRUE	0.290789	252.981	195.968	253.04
rs1240390	G	A	G	A	1.14478	-0.034	0.805331	0.76	FALSE	FALSE	FALSE	ukb-saige-153	10	88725984	0.025	387318	0.18	Colorectal cancer || id:ukb-saige-153	Colorectal cancer	Colorectal cancer || ||	TRUE	MedicineITLab	0.0567877	619	8.17623e-70	SNCG	TRUE	reported	finn-pQTL-R10-v1-SNCG	2	TRUE	0.410909	430.376	195.968	406.383
rs484147	G	A	G	A	-0.699081	0.044	0.0621971	0.088	FALSE	FALSE	FALSE	ukb-saige-153	11	64792563	0.038	387318	0.24	Colorectal cancer || id:ukb-saige-153	Colorectal cancer	Colorectal cancer || ||	TRUE	MedicineITLab	0.115001	619	2.12029e-09	SNX15	TRUE	reported	finn-pQTL-R10-v1-SNX15	2	TRUE	0.0570121	37.3032	195.968	36.9532
rs2855262	C	T	C	T	-0.351137	0.01	0.675283	0.65	FALSE	FALSE	FALSE	ukb-saige-153	4	24801976	0.022	387318	0.65	Colorectal cancer || id:ukb-saige-153	Colorectal cancer	Colorectal cancer || ||	TRUE	MedicineITLab	0.0573528	619	1.64047e-09	SOD3	TRUE	reported	finn-pQTL-R10-v1-SOD3	2	TRUE	0.0540722	35.2697	195.968	37.4838
rs4234798	G	T	G	T	-0.584041	-0.041	0.615509	0.62	FALSE	FALSE	FALSE	ukb-saige-153	4	7219933	0.022	387318	0.063	Colorectal cancer || id:ukb-saige-153	Colorectal cancer	Colorectal cancer || ||	TRUE	MedicineITLab	0.0517399	619	5.41726e-27	SORCS2	TRUE	reported	finn-pQTL-R10-v1-SORCS2	2	TRUE	0.16145	118.794	195.968	127.419
rs2935122	C	T	C	T	-0.503954	-0.0013	0.599354	0.56	FALSE	FALSE	FALSE	ukb-saige-153	8	101184740	0.021	387318	0.95	Colorectal cancer || id:ukb-saige-153	Colorectal cancer	Colorectal cancer || ||	TRUE	MedicineITLab	0.0538265	619	1.43272e-19	SPAG1	TRUE	reported	finn-pQTL-R10-v1-SPAG1	2	TRUE	0.121971	85.7101	195.968	87.6576
rs1049544	C	G	C	G	0.809366	0.013	0.38853	0.35	FALSE	TRUE	FALSE	ukb-saige-153	4	88415636	0.022	387318	0.56	Colorectal cancer || id:ukb-saige-153	Colorectal cancer	Colorectal cancer || ||	TRUE	MedicineITLab	0.0482628	619	2.75406e-52	SPARCL1	TRUE	reported	finn-pQTL-R10-v1-SPARCL1	2	TRUE	0.311257	278.835	195.968	281.232
rs6580502	C	T	C	T	-0.420791	-0.031	0.693861	0.61	FALSE	FALSE	FALSE	ukb-saige-153	5	147208043	0.022	387318	0.16	Colorectal cancer || id:ukb-saige-153	Colorectal cancer	Colorectal cancer || ||	TRUE	MedicineITLab	0.060848	619	1.16847e-11	SPINK1	TRUE	reported	finn-pQTL-R10-v1-SPINK1	2	TRUE	0.0752236	50.1883	195.968	47.8234
rs59156171	G	A	G	A	1.75445	0.043	0.0185784	0.022	FALSE	FALSE	FALSE	ukb-saige-153	4	57662676	0.073	387318	0.55	Colorectal cancer || id:ukb-saige-153	Colorectal cancer	Colorectal cancer || ||	TRUE	MedicineITLab	0.200546	619	2.05817e-17	SPINK2	TRUE	reported	finn-pQTL-R10-v1-SPINK2	2	TRUE	0.112247	78.0134	195.968	76.5339
rs7044562	C	T	C	T	-1.14327	0.029	0.874798	0.84	FALSE	FALSE	FALSE	ukb-saige-153	9	33233022	0.03	387318	0.33	Colorectal cancer || id:ukb-saige-153	Colorectal cancer	Colorectal cancer || ||	TRUE	MedicineITLab	0.0708734	619	4.2058e-49	SPINK4	TRUE	reported	finn-pQTL-R10-v1-SPINK4	2	TRUE	0.286317	247.529	195.968	260.214
rs4642357	G	A	G	A	-0.4548	0.0086	0.368336	0.37	FALSE	FALSE	FALSE	ukb-saige-153	5	147519370	0.022	387318	0.7	Colorectal cancer || id:ukb-saige-153	Colorectal cancer	Colorectal cancer || ||	TRUE	MedicineITLab	0.0543797	619	4.06347e-16	SPINK5	TRUE	reported	finn-pQTL-R10-v1-SPINK5	2	TRUE	0.0962501	65.711	195.968	69.9467
rs6868569	G	T	G	T	-0.426523	0.0064	0.502423	0.55	FALSE	FALSE	FALSE	ukb-saige-153	5	147565814	0.021	387318	0.77	Colorectal cancer || id:ukb-saige-153	Colorectal cancer	Colorectal cancer || ||	TRUE	MedicineITLab	0.0533261	619	6.24923e-15	SPINK6	TRUE	reported	finn-pQTL-R10-v1-SPINK6	2	TRUE	0.0909588	61.7371	195.968	63.9743
rs1528669	T	G	T	G	0.33916	0.0084	0.353796	0.38	FALSE	FALSE	FALSE	ukb-saige-153	11	14037543	0.022	387318	0.7	Colorectal cancer || id:ukb-saige-153	Colorectal cancer	Colorectal cancer || ||	TRUE	MedicineITLab	0.05756	619	6.26615e-09	SPON1	TRUE	reported	finn-pQTL-R10-v1-SPON1	2	TRUE	0.0525971	34.2541	195.968	34.719
rs1970328	G	A	G	A	0.408236	0.0062	0.504039	0.55	FALSE	FALSE	FALSE	ukb-saige-153	1	152975829	0.021	387318	0.77	Colorectal cancer || id:ukb-saige-153	Colorectal cancer	Colorectal cancer || ||	TRUE	MedicineITLab	0.0539308	619	1.36962e-13	SPRR3	TRUE	reported	finn-pQTL-R10-v1-SPRR3	2	TRUE	0.0833229	56.0832	195.968	57.2992
rs8103017	G	C	G	C	0.602146	-0.008	0.310985	0.29	FALSE	TRUE	FALSE	ukb-saige-153	19	55999142	0.024	387318	0.73	Colorectal cancer || id:ukb-saige-153	Colorectal cancer	Colorectal cancer || ||	TRUE	MedicineITLab	0.0577069	619	1.38314e-23	SSC5D	TRUE	reported	finn-pQTL-R10-v1-SSC5D	2	TRUE	0.155382	113.508	195.968	108.88
rs115840458	G	A	G	A	0.737676	0.089	0.0767367	0.067	FALSE	FALSE	FALSE	ukb-saige-153	12	104034048	0.043	387318	0.038	Colorectal cancer || id:ukb-saige-153	Colorectal cancer	Colorectal cancer || ||	TRUE	MedicineITLab	0.104772	619	5.11187e-12	STAB2	TRUE	reported	finn-pQTL-R10-v1-STAB2	2	TRUE	0.0771063	51.5494	195.968	49.5725
rs3813356	T	C	T	C	-0.674945	-0.0084	0.463651	0.45	FALSE	FALSE	FALSE	ukb-saige-153	6	132834518	0.022	387318	0.7	Colorectal cancer || id:ukb-saige-153	Colorectal cancer	Colorectal cancer || ||	TRUE	MedicineITLab	0.0512276	619	4.15009e-35	STX7	TRUE	reported	finn-pQTL-R10-v1-STX7	2	TRUE	0.226572	180.747	195.968	173.592
rs35384521	A	G	A	G	-1.55317	0.059	0.0137318	0.02	FALSE	FALSE	FALSE	ukb-saige-153	7	56145825	0.077	387318	0.44	Colorectal cancer || id:ukb-saige-153	Colorectal cancer	Colorectal cancer || ||	TRUE	MedicineITLab	0.238	619	1.41059e-10	SUMF2	TRUE	reported	finn-pQTL-R10-v1-SUMF2	2	TRUE	0.0653417	43.1343	195.968	42.5877
rs117447789	C	T	C	T	1.21879	-0.074	0.0646204	0.036	FALSE	FALSE	FALSE	ukb-saige-153	22	24457377	0.057	387318	0.2	Colorectal cancer || id:ukb-saige-153	Colorectal cancer	Colorectal cancer || ||	TRUE	MedicineITLab	0.10239	619	1.48192e-29	SUSD2	TRUE	reported	finn-pQTL-R10-v1-SUSD2	2	TRUE	0.179575	135.049	195.968	141.691
rs185015030	C	G	C	G	-1.17077	-0.084	0.0250404	0.012	FALSE	TRUE	FALSE	ukb-saige-153	22	25011482	0.1	387318	0.42	Colorectal cancer || id:ukb-saige-153	Colorectal cancer	Colorectal cancer || ||	TRUE	MedicineITLab	0.161311	619	1.18734e-12	SUSD2	TRUE	reported	finn-pQTL-R10-v1-SUSD2	2	TRUE	0.066927	44.2558	195.968	52.6763
rs13085279	G	T	G	T	-0.529139	-0.0019	0.323102	0.22	FALSE	FALSE	FALSE	ukb-saige-153	3	33181197	0.026	387318	0.94	Colorectal cancer || id:ukb-saige-153	Colorectal cancer	Colorectal cancer || ||	TRUE	MedicineITLab	0.0578389	619	8.3238e-19	SUSD5	TRUE	reported	finn-pQTL-R10-v1-SUSD5	2	TRUE	0.122471	86.1105	195.968	83.695
rs3760709	A	G	A	G	0.433276	0.025	0.409532	0.43	FALSE	FALSE	FALSE	ukb-saige-153	19	50371399	0.021	387318	0.24	Colorectal cancer || id:ukb-saige-153	Colorectal cancer	Colorectal cancer || ||	TRUE	MedicineITLab	0.056564	619	7.22994e-14	TBC1D17	TRUE	reported	finn-pQTL-R10-v1-TBC1D17	2	TRUE	0.0907911	61.612	195.968	58.6745
rs2546155	C	T	C	T	0.360719	0.015	0.261712	0.32	FALSE	FALSE	FALSE	ukb-saige-153	5	76980679	0.023	387318	0.5	Colorectal cancer || id:ukb-saige-153	Colorectal cancer	Colorectal cancer || ||	TRUE	MedicineITLab	0.0628762	619	1.51097e-08	TBCA	TRUE	reported	finn-pQTL-R10-v1-TBCA	2	TRUE	0.0502826	32.6669	195.968	32.9128
rs34324219	A	C	A	C	-0.931534	-0.051	0.106624	0.11	FALSE	FALSE	FALSE	ukb-saige-153	11	59623378	0.034	387318	0.14	Colorectal cancer || id:ukb-saige-153	Colorectal cancer	Colorectal cancer || ||	TRUE	MedicineITLab	0.0877906	619	2.82967e-24	TCN1	TRUE	reported	finn-pQTL-R10-v1-TCN1	2	TRUE	0.165317	122.203	195.968	112.59
rs12485165	T	G	T	G	-0.917219	0.0096	0.138126	0.12	FALSE	FALSE	FALSE	ukb-saige-153	22	31020341	0.032	387318	0.77	Colorectal cancer || id:ukb-saige-153	Colorectal cancer	Colorectal cancer || ||	TRUE	MedicineITLab	0.0754895	619	1.31593e-30	TCN2	TRUE	reported	finn-pQTL-R10-v1-TCN2	2	TRUE	0.200307	154.546	195.968	147.629
rs4075311	C	T	C	T	0.607195	-0.017	0.427302	0.44	FALSE	FALSE	FALSE	ukb-saige-153	10	97574655	0.021	387318	0.42	Colorectal cancer || id:ukb-saige-153	Colorectal cancer	Colorectal cancer || ||	TRUE	MedicineITLab	0.0512098	619	2.32858e-29	TCTN3	TRUE	reported	finn-pQTL-R10-v1-TCTN3	2	TRUE	0.180446	135.848	195.968	140.589
rs9682509	C	G	C	G	1.09903	0.018	0.336026	0.25	FALSE	TRUE	FALSE	ukb-saige-153	3	46596264	0.025	387318	0.47	Colorectal cancer || id:ukb-saige-153	Colorectal cancer	Colorectal cancer || ||	TRUE	MedicineITLab	0.0364826	619	2.67258e-123	TDGF1	TRUE	reported	finn-pQTL-R10-v1-TDGF1	2	TRUE	0.53898	721.338	195.968	907.502
rs35033974	T	G	T	G	-0.463765	0.055	0.138934	0.13	FALSE	FALSE	FALSE	ukb-saige-153	19	43920612	0.032	387318	0.085	Colorectal cancer || id:ukb-saige-153	Colorectal cancer	Colorectal cancer || ||	TRUE	MedicineITLab	0.0800403	619	1.09535e-08	TEX101	TRUE	reported	finn-pQTL-R10-v1-TEX101	2	TRUE	0.0514601	33.4735	195.968	33.5721
rs8177260	A	T	A	T	0.378008	-0.0074	0.298061	0.35	FALSE	TRUE	FALSE	ukb-saige-153	3	133480458	0.022	387318	0.74	Colorectal cancer || id:ukb-saige-153	Colorectal cancer	Colorectal cancer || ||	TRUE	MedicineITLab	0.0612906	619	1.25536e-09	TF	TRUE	reported	finn-pQTL-R10-v1-TF	2	TRUE	0.0597911	39.2371	195.968	38.0377
rs3761376	A	G	A	G	-0.522732	0.0084	0.186591	0.24	FALSE	FALSE	FALSE	ukb-saige-153	21	43787038	0.025	387318	0.74	Colorectal cancer || id:ukb-saige-153	Colorectal cancer	Colorectal cancer || ||	TRUE	MedicineITLab	0.0726957	619	1.8723e-12	TFF1	TRUE	reported	finn-pQTL-R10-v1-TFF1	2	TRUE	0.0829445	55.8056	195.968	51.706
rs1912847	T	C	T	C	0.438778	-0.022	0.354604	0.34	FALSE	FALSE	FALSE	ukb-saige-153	2	188325273	0.023	387318	0.33	Colorectal cancer || id:ukb-saige-153	Colorectal cancer	Colorectal cancer || ||	TRUE	MedicineITLab	0.0558619	619	1.78522e-14	TFPI	TRUE	reported	finn-pQTL-R10-v1-TFPI	2	TRUE	0.0881231	59.6264	195.968	61.6962
rs9867473	C	A	C	A	-0.413701	-0.0042	0.521809	0.57	FALSE	FALSE	FALSE	ukb-saige-153	3	195831098	0.022	387318	0.85	Colorectal cancer || id:ukb-saige-153	Colorectal cancer	Colorectal cancer || ||	TRUE	MedicineITLab	0.0555351	619	3.17838e-13	TFRC	TRUE	reported	finn-pQTL-R10-v1-TFRC	2	TRUE	0.0854115	57.6203	195.968	55.493
rs56254331	C	A	C	A	0.40267	0.023	0.210016	0.17	FALSE	FALSE	FALSE	ukb-saige-153	19	41826020	0.028	387318	0.41	Colorectal cancer || id:ukb-saige-153	Colorectal cancer	Colorectal cancer || ||	TRUE	MedicineITLab	0.0694588	619	1.07632e-08	TGFB1	TRUE	reported	finn-pQTL-R10-v1-TGFB1	2	TRUE	0.0538021	35.0835	195.968	33.6081
rs916951	G	A	G	A	-0.60813	0.027	0.534733	0.51	FALSE	FALSE	FALSE	ukb-saige-153	5	135384443	0.021	387318	0.21	Colorectal cancer || id:ukb-saige-153	Colorectal cancer	Colorectal cancer || ||	TRUE	MedicineITLab	0.0500961	619	1.46694e-30	TGFBI	TRUE	reported	finn-pQTL-R10-v1-TGFBI	2	TRUE	0.184019	139.145	195.968	147.362
rs6547612	T	C	T	C	-0.688519	0.0072	0.628433	0.52	FALSE	FALSE	FALSE	ukb-saige-153	2	85551184	0.021	387318	0.74	Colorectal cancer || id:ukb-saige-153	Colorectal cancer	Colorectal cancer || ||	TRUE	MedicineITLab	0.051788	619	1.20218e-35	TGOLN2	TRUE	reported	finn-pQTL-R10-v1-TGOLN2	2	TRUE	0.22139	175.438	195.968	176.756
rs73043837	A	G	A	G	0.665217	-0.015	0.131664	0.098	FALSE	FALSE	FALSE	ukb-saige-153	6	169617889	0.036	387318	0.68	Colorectal cancer || id:ukb-saige-153	Colorectal cancer	Colorectal cancer || ||	TRUE	MedicineITLab	0.0789394	619	2.50163e-16	THBS2	TRUE	reported	finn-pQTL-R10-v1-THBS2	2	TRUE	0.101184	69.4586	195.968	71.0132
rs759073	C	T	C	T	0.30943	-0.023	0.543619	0.43	FALSE	FALSE	FALSE	ukb-saige-153	19	2732986	0.023	387318	0.3	Colorectal cancer || id:ukb-saige-153	Colorectal cancer	Colorectal cancer || ||	TRUE	MedicineITLab	0.0555133	619	3.72452e-08	THOP1	TRUE	reported	finn-pQTL-R10-v1-THOP1	2	TRUE	0.0475091	30.7752	195.968	31.0692
rs7159262	C	A	C	A	-1.18373	-0.032	0.0815832	0.09	FALSE	FALSE	FALSE	ukb-saige-153	14	24020127	0.037	387318	0.4	Colorectal cancer || id:ukb-saige-153	Colorectal cancer	Colorectal cancer || ||	TRUE	MedicineITLab	0.0912185	619	3.20672e-34	THTPA	TRUE	reported	finn-pQTL-R10-v1-THTPA	2	TRUE	0.209979	163.992	195.968	168.399
rs55933700	T	G	T	G	-1.13495	-0.0082	0.0193861	0.025	FALSE	FALSE	FALSE	ukb-saige-153	11	119293913	0.072	387318	0.91	Colorectal cancer || id:ukb-saige-153	Colorectal cancer	Colorectal cancer || ||	TRUE	MedicineITLab	0.194543	619	8.74251e-09	THY1	TRUE	reported	finn-pQTL-R10-v1-THY1	2	TRUE	0.0489747	31.7735	195.968	34.0347
rs4821097	G	A	G	A	-0.396746	0.0078	0.739903	0.73	FALSE	FALSE	FALSE	ukb-saige-153	22	33159092	0.024	387318	0.75	Colorectal cancer || id:ukb-saige-153	Colorectal cancer	Colorectal cancer || ||	TRUE	MedicineITLab	0.0633576	619	7.1239e-10	TIMP3	TRUE	reported	finn-pQTL-R10-v1-TIMP3	2	TRUE	0.060585	39.7917	195.968	39.2128
rs454615	C	T	C	T	0.588342	0.0088	0.855412	0.83	FALSE	FALSE	FALSE	ukb-saige-153	3	12077010	0.028	387318	0.76	Colorectal cancer || id:ukb-saige-153	Colorectal cancer	Colorectal cancer || ||	TRUE	MedicineITLab	0.0772804	619	1.00786e-13	TIMP4	TRUE	reported	finn-pQTL-R10-v1-TIMP4	2	TRUE	0.0856244	57.7774	195.968	57.959
rs1401574	A	T	A	T	-0.464397	0.024	0.275444	0.25	FALSE	TRUE	FALSE	ukb-saige-153	4	186935383	0.025	387318	0.34	Colorectal cancer || id:ukb-saige-153	Colorectal cancer	Colorectal cancer || ||	TRUE	MedicineITLab	0.061109	619	1.10963e-13	TLR3	TRUE	reported	finn-pQTL-R10-v1-TLR3	2	TRUE	0.0860823	58.1155	195.968	57.7522
rs10160395	C	G	C	G	0.555318	-0.086	0.396607	0.4	FALSE	TRUE	FALSE	ukb-saige-153	11	60680354	0.022	387318	7.3e-05	Colorectal cancer || id:ukb-saige-153	Colorectal cancer	Colorectal cancer || ||	TRUE	MedicineITLab	0.0505651	619	9.43621e-26	TMEM132A	TRUE	reported	finn-pQTL-R10-v1-TMEM132A	2	TRUE	0.147596	106.835	195.968	120.61
rs45558732	T	G	T	G	-1.28269	-0.17	0.0169628	0.033	FALSE	FALSE	FALSE	ukb-saige-153	11	118402962	0.06	387318	0.0057	Colorectal cancer || id:ukb-saige-153	Colorectal cancer	Colorectal cancer || ||	TRUE	MedicineITLab	0.216058	619	4.85228e-09	TMEM25	TRUE	reported	finn-pQTL-R10-v1-TMEM25	2	TRUE	0.0548708	35.8208	195.968	35.2454
rs1533053	G	C	G	C	0.760852	0.0014	0.632472	0.64	FALSE	TRUE	FALSE	ukb-saige-153	11	113552612	0.022	387318	0.95	Colorectal cancer || id:ukb-saige-153	Colorectal cancer	Colorectal cancer || ||	TRUE	MedicineITLab	0.0478073	619	4.89819e-48	TMPRSS5	TRUE	reported	finn-pQTL-R10-v1-TMPRSS5	2	TRUE	0.26913	227.199	195.968	253.286
rs13278062	T	G	T	G	-0.496705	-0.0044	0.510501	0.5	FALSE	FALSE	FALSE	ukb-saige-153	8	23082971	0.021	387318	0.84	Colorectal cancer || id:ukb-saige-153	Colorectal cancer	Colorectal cancer || ||	TRUE	MedicineITLab	0.0562706	619	1.10402e-17	TNFRSF10A	TRUE	reported	finn-pQTL-R10-v1-TNFRSF10A	2	TRUE	0.123304	86.7783	195.968	77.9173
rs7009522	A	G	A	G	0.360703	0.026	0.777868	0.79	FALSE	FALSE	FALSE	ukb-saige-153	8	22957606	0.026	387318	0.31	Colorectal cancer || id:ukb-saige-153	Colorectal cancer	Colorectal cancer || ||	TRUE	MedicineITLab	0.0645308	619	3.41891e-08	TNFRSF10C	TRUE	reported	finn-pQTL-R10-v1-TNFRSF10C	2	TRUE	0.0449621	29.0477	195.968	31.2439
rs56051253	A	G	A	G	-0.42365	-0.048	0.314216	0.35	FALSE	FALSE	FALSE	ukb-saige-153	18	60034649	0.022	387318	0.032	Colorectal cancer || id:ukb-saige-153	Colorectal cancer	Colorectal cancer || ||	TRUE	MedicineITLab	0.0574749	619	5.46594e-13	TNFRSF11A	TRUE	reported	finn-pQTL-R10-v1-TNFRSF11A	2	TRUE	0.07735	51.7259	195.968	54.3323
rs5996077	G	C	G	C	-0.786293	-0.022	0.131664	0.14	FALSE	TRUE	FALSE	ukb-saige-153	22	42285868	0.031	387318	0.47	Colorectal cancer || id:ukb-saige-153	Colorectal cancer	Colorectal cancer || ||	TRUE	MedicineITLab	0.0797189	619	2.08343e-21	TNFRSF13C	TRUE	reported	finn-pQTL-R10-v1-TNFRSF13C	2	TRUE	0.141369	101.586	195.968	97.2851
rs6011040	G	A	G	A	-0.43424	-0.056	0.723748	0.67	FALSE	FALSE	FALSE	ukb-saige-153	20	62337406	0.023	387318	0.012	Colorectal cancer || id:ukb-saige-153	Colorectal cancer	Colorectal cancer || ||	TRUE	MedicineITLab	0.0599101	619	1.26772e-12	TNFRSF6B	TRUE	reported	finn-pQTL-R10-v1-TNFRSF6B	2	TRUE	0.0754019	50.317	195.968	52.5363
rs574044675	C	A	C	A	-0.90932	2.6	0.03958	0.00014	FALSE	FALSE	FALSE	ukb-saige-153	3	172274232	1.1	387318	0.015	Colorectal cancer || id:ukb-saige-153	Colorectal cancer	Colorectal cancer || ||	TRUE	MedicineITLab	0.144387	619	5.73848e-10	TNFSF10	TRUE	reported	finn-pQTL-R10-v1-TNFSF10	2	TRUE	0.0628638	41.3888	195.968	39.6622
rs344560	C	T	C	T	0.770104	-0.049	0.941842	0.95	FALSE	FALSE	FALSE	ukb-saige-153	19	6665020	0.047	387318	0.29	Colorectal cancer || id:ukb-saige-153	Colorectal cancer	Colorectal cancer || ||	TRUE	MedicineITLab	0.119559	619	2.38632e-10	TNFSF14	TRUE	reported	finn-pQTL-R10-v1-TNFSF14	2	TRUE	0.0649705	42.8722	195.968	41.4891
rs3115570	G	A	G	A	0.206567	-0.0097	0.315787	0.4	FALSE	FALSE	FALSE	ukb-saige-153	6	32222706	0.022	387318	0.66	Colorectal cancer || id:ukb-saige-153	Colorectal cancer	Colorectal cancer || ||	TRUE	MedicineITLab	0.0366187	1732	1.97083e-08	TNXB	TRUE	reported	finn-pQTL-R10-v1-TNXB	2	TRUE	0.018439	32.4987	195.968	31.8212
rs474534	G	A	G	A	-0.397229	-0.075	0.187644	0.12	FALSE	FALSE	FALSE	ukb-saige-153	6	31938107	0.034	387318	0.025	Colorectal cancer || id:ukb-saige-153	Colorectal cancer	Colorectal cancer || ||	TRUE	MedicineITLab	0.0429805	1732	6.87227e-20	TNXB	TRUE	reported	finn-pQTL-R10-v1-TNXB	2	TRUE	0.0481053	87.4279	195.968	85.4159
rs9267677	C	T	C	T	0.526632	0.066	0.057448	0.094	FALSE	FALSE	FALSE	ukb-saige-153	6	31892641	0.037	387318	0.072	Colorectal cancer || id:ukb-saige-153	Colorectal cancer	Colorectal cancer || ||	TRUE	MedicineITLab	0.072613	1732	6.14045e-13	TNXB	TRUE	reported	finn-pQTL-R10-v1-TNXB	2	TRUE	0.0300348	53.5691	195.968	52.6
rs10191964	A	G	A	G	-0.698029	-0.03	0.207052	0.16	FALSE	FALSE	FALSE	ukb-saige-153	2	24287598	0.029	387318	0.3	Colorectal cancer || id:ukb-saige-153	Colorectal cancer	Colorectal cancer || ||	TRUE	MedicineITLab	0.0384742	1732	1.76807e-67	TP53I3	TRUE	reported	finn-pQTL-R10-v1-TP53I3	2	TRUE	0.159993	329.507	195.968	329.161
rs2702053	C	T	C	T	0.567878	-0.11	0.0345879	0.01	FALSE	FALSE	FALSE	ukb-saige-153	2	24654338	0.11	387318	0.31	Colorectal cancer || id:ukb-saige-153	Colorectal cancer	Colorectal cancer || ||	TRUE	MedicineITLab	0.094688	1732	2.43635e-09	TP53I3	TRUE	reported	finn-pQTL-R10-v1-TP53I3	2	TRUE	0.0215366	38.0784	195.968	35.9683
rs10261806	A	G	A	G	-0.252475	-0.033	0.344207	0.41	FALSE	FALSE	FALSE	ukb-saige-153	7	144532104	0.022	387318	0.13	Colorectal cancer || id:ukb-saige-153	Colorectal cancer	Colorectal cancer || ||	TRUE	MedicineITLab	0.0352753	1732	1.21116e-12	TPK1	TRUE	reported	finn-pQTL-R10-v1-TPK1	2	TRUE	0.0287775	51.2602	195.968	51.2266
rs2371554	A	G	A	G	0.52977	0.094	0.0355885	0.034	FALSE	FALSE	FALSE	ukb-saige-153	7	144347472	0.059	387318	0.11	Colorectal cancer || id:ukb-saige-153	Colorectal cancer	Colorectal cancer || ||	TRUE	MedicineITLab	0.0906401	1732	6.04993e-09	TPK1	TRUE	reported	finn-pQTL-R10-v1-TPK1	2	TRUE	0.0192653	33.9838	195.968	34.1613
rs73726531	G	C	G	C	-0.927629	0.026	0.0293439	0.051	FALSE	TRUE	FALSE	ukb-saige-153	6	18103028	0.049	387318	0.59	Colorectal cancer || id:ukb-saige-153	Colorectal cancer	Colorectal cancer || ||	TRUE	MedicineITLab	0.095902	1732	1.3712e-21	TPMT	TRUE	reported	finn-pQTL-R10-v1-TPMT	2	TRUE	0.0490187	89.1735	195.968	93.5607
rs192679175	A	G	A	G	0.932151	-0.11	0.0253318	0.0041	FALSE	FALSE	FALSE	ukb-saige-153	16	1177026	0.19	387318	0.54	Colorectal cancer || id:ukb-saige-153	Colorectal cancer	Colorectal cancer || ||	TRUE	MedicineITLab	0.109105	1732	2.80867e-17	TPSD1	TRUE	reported	finn-pQTL-R10-v1-TPSD1	2	TRUE	0.0429067	77.5563	195.968	72.9933
rs753357	T	G	T	G	0.381364	0.018	0.339485	0.37	FALSE	FALSE	FALSE	ukb-saige-153	16	1311797	0.022	387318	0.41	Colorectal cancer || id:ukb-saige-153	Colorectal cancer	Colorectal cancer || ||	TRUE	MedicineITLab	0.0351782	1732	1.53709e-26	TPSD1	TRUE	reported	finn-pQTL-R10-v1-TPSD1	2	TRUE	0.0652248	120.712	195.968	117.526
rs692750	T	G	T	G	0.986943	0.016	0.318255	0.32	FALSE	FALSE	FALSE	ukb-saige-153	11	118538308	0.023	387318	0.47	Colorectal cancer || id:ukb-saige-153	Colorectal cancer	Colorectal cancer || ||	TRUE	MedicineITLab	0.0456684	619	1.51443e-77	TREH	TRUE	reported	finn-pQTL-R10-v1-TREH	2	TRUE	0.42268	451.731	195.968	467.038
rs143332484	T	C	T	C	-1.83407	0.14	0.0129241	0.01	FALSE	FALSE	FALSE	ukb-saige-153	6	41129207	0.11	387318	0.2	Colorectal cancer || id:ukb-saige-153	Colorectal cancer	Colorectal cancer || ||	TRUE	MedicineITLab	0.242445	619	1.41617e-13	TREM2	TRUE	reported	finn-pQTL-R10-v1-TREM2	2	TRUE	0.0858248	57.9253	195.968	57.2276
rs13207171	T	C	T	C	-0.764743	-0.0013	0.100162	0.13	FALSE	FALSE	FALSE	ukb-saige-153	6	41165819	0.032	387318	0.97	Colorectal cancer || id:ukb-saige-153	Colorectal cancer	Colorectal cancer || ||	TRUE	MedicineITLab	0.0906833	619	2.38576e-16	TREML2	TRUE	reported	finn-pQTL-R10-v1-TREML2	2	TRUE	0.105421	72.7101	195.968	71.1175
rs2270586	A	G	A	G	0.414264	-0.043	0.357027	0.41	FALSE	FALSE	FALSE	ukb-saige-153	12	71531639	0.022	387318	0.051	Colorectal cancer || id:ukb-saige-153	Colorectal cancer	Colorectal cancer || ||	TRUE	MedicineITLab	0.058519	619	3.95993e-12	TSPAN8	TRUE	reported	finn-pQTL-R10-v1-TSPAN8	2	TRUE	0.0787913	52.7722	195.968	50.1142
rs3733897	G	A	G	A	1.07357	0.035	0.210016	0.13	FALSE	FALSE	FALSE	ukb-saige-153	5	134223593	0.031	387318	0.26	Colorectal cancer || id:ukb-saige-153	Colorectal cancer	Colorectal cancer || ||	TRUE	MedicineITLab	0.0553967	619	1.04305e-65	TXNDC15	TRUE	reported	finn-pQTL-R10-v1-TXNDC15	2	TRUE	0.382438	382.09	195.968	375.572
rs361725	C	T	C	T	0.469531	0.018	0.67609	0.64	FALSE	FALSE	FALSE	ukb-saige-153	22	50971047	0.022	387318	0.41	Colorectal cancer || id:ukb-saige-153	Colorectal cancer	Colorectal cancer || ||	TRUE	MedicineITLab	0.0570438	619	1.10665e-15	TYMP	TRUE	reported	finn-pQTL-R10-v1-TYMP	2	TRUE	0.0965578	65.9435	195.968	67.7504
rs8025212	G	A	G	A	-0.592133	-0.012	0.363489	0.33	FALSE	FALSE	FALSE	ukb-saige-153	15	41880619	0.023	387318	0.61	Colorectal cancer || id:ukb-saige-153	Colorectal cancer	Colorectal cancer || ||	TRUE	MedicineITLab	0.0549715	619	6.55306e-25	TYRO3	TRUE	reported	finn-pQTL-R10-v1-TYRO3	2	TRUE	0.162243	119.49	195.968	116.028
rs77109643	C	A	C	A	-0.549873	0.0099	0.0463922	0.041	FALSE	FALSE	FALSE	ukb-saige-153	6	150236723	0.055	387318	0.86	Colorectal cancer || id:ukb-saige-153	Colorectal cancer	Colorectal cancer || ||	TRUE	MedicineITLab	0.0811738	1732	1.7108e-11	ULBP2	TRUE	reported	finn-pQTL-R10-v1-ULBP2	2	TRUE	0.0267528	47.5546	195.968	45.8874
rs78251044	C	T	C	T	0.835962	0.0094	0.0239551	0.012	FALSE	FALSE	FALSE	ukb-saige-153	6	150248049	0.1	387318	0.93	Colorectal cancer || id:ukb-saige-153	Colorectal cancer	Colorectal cancer || ||	TRUE	MedicineITLab	0.110796	1732	7.2644e-14	ULBP2	TRUE	reported	finn-pQTL-R10-v1-ULBP2	2	TRUE	0.0326792	58.4449	195.968	56.9279
rs9478331	G	A	G	A	-0.746772	0.0047	0.201227	0.15	FALSE	FALSE	FALSE	ukb-saige-153	6	150303049	0.031	387318	0.88	Colorectal cancer || id:ukb-saige-153	Colorectal cancer	Colorectal cancer || ||	TRUE	MedicineITLab	0.0391853	1732	1.18277e-73	ULBP2	TRUE	reported	finn-pQTL-R10-v1-ULBP2	2	TRUE	0.179273	377.888	195.968	363.187
rs28510439	T	C	T	C	0.595692	0.00018	0.0602749	0.11	FALSE	FALSE	FALSE	ukb-saige-153	16	20381704	0.034	387318	1	Colorectal cancer || id:ukb-saige-153	Colorectal cancer	Colorectal cancer || ||	TRUE	MedicineITLab	0.0702656	1732	4.84507e-17	UMOD	TRUE	reported	finn-pQTL-R10-v1-UMOD	2	TRUE	0.0401986	72.4562	195.968	71.8717
rs9933330	T	C	T	C	-0.947131	-0.0088	0.230235	0.18	FALSE	FALSE	FALSE	ukb-saige-153	16	20366810	0.028	387318	0.75	Colorectal cancer || id:ukb-saige-153	Colorectal cancer	Colorectal cancer || ||	TRUE	MedicineITLab	0.033839	1732	1.65577e-142	UMOD	TRUE	reported	finn-pQTL-R10-v1-UMOD	2	TRUE	0.317965	806.527	195.968	783.403
rs35713275	A	G	A	G	-0.873913	-0.016	0.0533838	0.063	FALSE	FALSE	FALSE	ukb-saige-153	16	4431360	0.045	387318	0.72	Colorectal cancer || id:ukb-saige-153	Colorectal cancer	Colorectal cancer || ||	TRUE	MedicineITLab	0.0709339	1732	1.71199e-33	VASN	TRUE	reported	finn-pQTL-R10-v1-VASN	2	TRUE	0.077188	144.705	195.968	151.785
rs2504462	A	G	A	G	0.348612	0.0071	0.922931	0.89	FALSE	FALSE	FALSE	ukb-saige-153	1	108237931	0.034	387318	0.83	Colorectal cancer || id:ukb-saige-153	Colorectal cancer	Colorectal cancer || ||	TRUE	MedicineITLab	0.061729	1732	1.89998e-08	VAV3	TRUE	reported	finn-pQTL-R10-v1-VAV3	2	TRUE	0.0172888	30.4357	195.968	31.8938
rs2429236	C	G	C	G	-0.248327	-0.00097	0.742671	0.73	FALSE	TRUE	FALSE	ukb-saige-153	5	81769633	0.024	387318	0.97	Colorectal cancer || id:ukb-saige-153	Colorectal cancer	Colorectal cancer || ||	TRUE	MedicineITLab	0.0381477	1732	9.84238e-11	VCAN	TRUE	reported	finn-pQTL-R10-v1-VCAN	2	TRUE	0.0235702	41.7607	195.968	42.3751
rs6921438	A	G	A	G	-0.509837	0.017	0.476504	0.49	FALSE	FALSE	FALSE	ukb-saige-153	6	43925607	0.021	387318	0.43	Colorectal cancer || id:ukb-saige-153	Colorectal cancer	Colorectal cancer || ||	TRUE	MedicineITLab	0.0314396	1732	3.6509e-55	VEGFA	TRUE	reported	finn-pQTL-R10-v1-VEGFA	2	TRUE	0.12968	257.774	195.968	262.971
rs13001001	G	A	G	A	-0.563751	0.052	0.600162	0.63	FALSE	FALSE	FALSE	ukb-saige-153	2	36996580	0.022	387318	0.02	Colorectal cancer || id:ukb-saige-153	Colorectal cancer	Colorectal cancer || ||	TRUE	MedicineITLab	0.0545092	619	3.15017e-23	VIT	TRUE	reported	finn-pQTL-R10-v1-VIT	2	TRUE	0.152531	111.05	195.968	106.963
rs2279961	C	G	C	G	-1.08696	-0.043	0.151858	0.11	FALSE	TRUE	FALSE	ukb-saige-153	17	4689313	0.034	387318	0.21	Colorectal cancer || id:ukb-saige-153	Colorectal cancer	Colorectal cancer || ||	TRUE	MedicineITLab	0.064469	619	9.68768e-53	VMO1	TRUE	reported	finn-pQTL-R10-v1-VMO1	2	TRUE	0.304343	269.931	195.968	284.266
rs2272996	C	T	C	T	-0.935092	-0.037	0.285945	0.27	FALSE	FALSE	FALSE	ukb-saige-153	6	133015271	0.024	387318	0.12	Colorectal cancer || id:ukb-saige-153	Colorectal cancer	Colorectal cancer || ||	TRUE	MedicineITLab	0.0490972	619	5.84187e-64	VNN1	TRUE	reported	finn-pQTL-R10-v1-VNN1	2	TRUE	0.35707	342.668	195.968	362.74
rs9493423	A	G	A	G	-0.699655	-0.014	0.342488	0.33	FALSE	FALSE	FALSE	ukb-saige-153	6	133074133	0.023	387318	0.53	Colorectal cancer || id:ukb-saige-153	Colorectal cancer	Colorectal cancer || ||	TRUE	MedicineITLab	0.0507051	619	6.08536e-38	VNN2	TRUE	reported	finn-pQTL-R10-v1-VNN2	2	TRUE	0.220469	174.501	195.968	190.399
rs7307331	A	G	A	G	0.90792	0.029	0.279483	0.3	FALSE	FALSE	FALSE	ukb-saige-153	12	118509191	0.023	387318	0.22	Colorectal cancer || id:ukb-saige-153	Colorectal cancer	Colorectal cancer || ||	TRUE	MedicineITLab	0.0551677	619	1.00801e-50	VSIG10	TRUE	reported	finn-pQTL-R10-v1-VSIG10	2	TRUE	0.33199	306.639	195.968	270.848
rs67458277	T	C	T	C	-0.386626	-0.0038	0.568659	0.68	FALSE	FALSE	FALSE	ukb-saige-153	2	17649034	0.023	387318	0.87	Colorectal cancer || id:ukb-saige-153	Colorectal cancer	Colorectal cancer || ||	TRUE	MedicineITLab	0.0556989	619	9.85894e-12	VSNL1	TRUE	reported	finn-pQTL-R10-v1-VSNL1	2	TRUE	0.0733305	48.8253	195.968	48.1824
rs2433724	C	T	C	T	-0.710191	-0.019	0.466882	0.43	FALSE	FALSE	FALSE	ukb-saige-153	19	54545531	0.021	387318	0.37	Colorectal cancer || id:ukb-saige-153	Colorectal cancer	Colorectal cancer || ||	TRUE	MedicineITLab	0.0486622	619	1.17042e-41	VSTM1	TRUE	reported	finn-pQTL-R10-v1-VSTM1	2	TRUE	0.251079	206.852	195.968	212.994
rs482968	A	G	A	G	-0.386403	-0.045	0.434572	0.46	FALSE	FALSE	FALSE	ukb-saige-153	7	49818127	0.021	387318	0.035	Colorectal cancer || id:ukb-saige-153	Colorectal cancer	Colorectal cancer || ||	TRUE	MedicineITLab	0.0566168	619	2.10723e-11	VWC2	TRUE	reported	finn-pQTL-R10-v1-VWC2	2	TRUE	0.0733753	48.8575	195.968	46.579
rs10860848	A	G	A	G	-0.45838	0.0065	0.331987	0.22	FALSE	FALSE	FALSE	ukb-saige-153	12	102616249	0.026	387318	0.8	Colorectal cancer || id:ukb-saige-153	Colorectal cancer	Colorectal cancer || ||	TRUE	MedicineITLab	0.0594832	619	5.20475e-14	WASHC3	TRUE	reported	finn-pQTL-R10-v1-WASHC3	2	TRUE	0.0931939	63.41	195.968	59.3831
rs7225465	A	G	A	G	-0.695694	0.00018	0.677706	0.67	FALSE	FALSE	FALSE	ukb-saige-153	17	48916159	0.023	387318	0.99	Colorectal cancer || id:ukb-saige-153	Colorectal cancer	Colorectal cancer || ||	TRUE	MedicineITLab	0.0543492	619	1.94394e-33	WFIKKN2	TRUE	reported	finn-pQTL-R10-v1-WFIKKN2	2	TRUE	0.211427	165.426	195.968	163.851
rs34328291	A	G	A	G	0.854941	0.0047	0.22294	0.18	FALSE	FALSE	FALSE	ukb-saige-153	1	168514346	0.028	387318	0.86	Colorectal cancer || id:ukb-saige-153	Colorectal cancer	Colorectal cancer || ||	TRUE	MedicineITLab	0.0578507	619	1.56435e-42	XCL1	TRUE	reported	finn-pQTL-R10-v1-XCL1	2	TRUE	0.253247	209.244	195.968	218.401
rs4415243	C	A	C	A	1.08525	-0.0036	0.379645	0.44	FALSE	FALSE	FALSE	ukb-saige-153	7	76016979	0.021	387318	0.87	Colorectal cancer || id:ukb-saige-153	Colorectal cancer	Colorectal cancer || ||	TRUE	MedicineITLab	0.0370423	619	6.65436e-119	ZP3	TRUE	reported	finn-pQTL-R10-v1-ZP3	2	TRUE	0.554763	768.779	195.968	858.349

## Sheet: FinnGen Somascan
SNP	effect_allele.exposure	other_allele.exposure	effect_allele.outcome	other_allele.outcome	beta.exposure	beta.outcome	eaf.exposure	eaf.outcome	remove	palindromic	ambiguous	id.outcome	chr	pos	se.outcome	samplesize.outcome	pval.outcome	outcome	originalname.outcome	outcome.deprecated	mr_keep.outcome	data_source.outcome	se.exposure	samplesize.exposure	pval.exposure	exposure	mr_keep.exposure	pval_origin.exposure	id.exposure	action	mr_keep	R2	F	FMean	F_pow_beta_se
rs3810114	C	T	C	T	-1.07042	-0.029	0.807971	0.84	FALSE	FALSE	FALSE	ukb-saige-153	19	52006351	0.029	387318	0.33	Colorectal cancer || id:ukb-saige-153	Colorectal cancer	Colorectal cancer || ||	TRUE	MedicineITLab	0.0493435	828	6.12593e-83	SIGLEC12	TRUE	reported	finn-pQTL-s-R10-seq_10037_98	2	TRUE	0.35555	455.714	143.937	470.596
rs142370265	T	C	T	C	-0.792106	-0.063	0.0676329	0.043	FALSE	FALSE	FALSE	ukb-saige-153	1	104027932	0.054	387318	0.25	Colorectal cancer || id:ukb-saige-153	Colorectal cancer	Colorectal cancer || ||	TRUE	MedicineITLab	0.0927752	828	6.51419e-17	AMY2B	TRUE	reported	finn-pQTL-s-R10-seq_10439_57	2	TRUE	0.0791301	70.9779	143.937	72.8959
rs4806666	T	C	T	C	-1.00132	-0.046	0.545894	0.45	FALSE	FALSE	FALSE	ukb-saige-153	19	55888095	0.021	387318	0.03	Colorectal cancer || id:ukb-saige-153	Colorectal cancer	Colorectal cancer || ||	TRUE	MedicineITLab	0.0341074	828	2.56095e-130	TMEM190	TRUE	reported	finn-pQTL-s-R10-seq_10442_1	2	TRUE	0.497097	816.465	143.937	861.883
rs2486950	C	G	C	G	-0.984451	-0.018	0.189614	0.2	FALSE	TRUE	FALSE	ukb-saige-153	1	203174670	0.027	387318	0.49	Colorectal cancer || id:ukb-saige-153	Colorectal cancer	Colorectal cancer || ||	TRUE	MedicineITLab	0.052467	828	1.05967e-65	CHIT1	TRUE	reported	finn-pQTL-s-R10-seq_10460_1	2	TRUE	0.297838	350.367	143.937	352.059
rs11225415	G	C	G	C	-0.415237	-0.044	0.227053	0.28	FALSE	TRUE	FALSE	ukb-saige-153	11	102632379	0.024	387318	0.067	Colorectal cancer || id:ukb-saige-153	Colorectal cancer	Colorectal cancer || ||	TRUE	MedicineITLab	0.0568118	828	6.35556e-13	MMP10	TRUE	reported	finn-pQTL-s-R10-seq_10479_18	2	TRUE	0.06052	53.2098	143.937	53.4214
rs2712417	G	A	G	A	-0.419442	-0.03	0.608696	0.62	FALSE	FALSE	FALSE	ukb-saige-153	3	128345179	0.022	387318	0.17	Colorectal cancer || id:ukb-saige-153	Colorectal cancer	Colorectal cancer || ||	TRUE	MedicineITLab	0.0477881	828	9.51783e-18	RPN1	TRUE	reported	finn-pQTL-s-R10-seq_10490_3	2	TRUE	0.0838086	75.5583	143.937	77.0379
rs1534881	A	G	A	G	-0.823365	-0.006	0.600845	0.45	FALSE	FALSE	FALSE	ukb-saige-153	22	37329448	0.021	387318	0.78	Colorectal cancer || id:ukb-saige-153	Colorectal cancer	Colorectal cancer || ||	TRUE	MedicineITLab	0.0392882	828	1.56058e-78	CSF2RB	TRUE	reported	finn-pQTL-s-R10-seq_10512_13	2	TRUE	0.325176	398.023	143.937	439.198
rs62282371	G	T	G	T	-0.452551	-0.014	0.128019	0.13	FALSE	FALSE	FALSE	ukb-saige-153	3	164911694	0.032	387318	0.65	Colorectal cancer || id:ukb-saige-153	Colorectal cancer	Colorectal cancer || ||	TRUE	MedicineITLab	0.0686559	828	7.75248e-11	SLITRK3	TRUE	reported	finn-pQTL-s-R10-seq_10565_19	2	TRUE	0.0457242	39.5779	143.937	43.449
rs4920605	A	G	A	G	0.421573	0.0055	0.527174	0.57	FALSE	FALSE	FALSE	ukb-saige-153	1	17315425	0.021	387318	0.8	Colorectal cancer || id:ukb-saige-153	Colorectal cancer	Colorectal cancer || ||	TRUE	MedicineITLab	0.0471449	828	2.46479e-18	MFAP2	TRUE	reported	finn-pQTL-s-R10-seq_10569_28	2	TRUE	0.0885994	80.2974	143.937	79.9606
rs12242	C	T	C	T	-0.683545	0.0074	0.0628019	0.068	FALSE	FALSE	FALSE	ukb-saige-153	20	24964558	0.042	387318	0.86	Colorectal cancer || id:ukb-saige-153	Colorectal cancer	Colorectal cancer || ||	TRUE	MedicineITLab	0.0977259	828	5.49886e-12	APMAP	TRUE	reported	finn-pQTL-s-R10-seq_10605_22	2	TRUE	0.0550007	48.0747	143.937	48.9232
rs10993994	G	A	G	A	1.0152	0.0065	0.664855	0.61	FALSE	FALSE	FALSE	ukb-saige-153	10	51549496	0.022	387318	0.77	Colorectal cancer || id:ukb-saige-153	Colorectal cancer	Colorectal cancer || ||	TRUE	MedicineITLab	0.0392458	828	1.5384e-108	MSMB	TRUE	reported	finn-pQTL-s-R10-seq_10620_21	2	TRUE	0.459296	701.639	143.937	669.14
rs4984830	A	G	A	G	-0.889288	-0.015	0.915459	0.87	FALSE	FALSE	FALSE	ukb-saige-153	16	1453043	0.032	387318	0.65	Colorectal cancer || id:ukb-saige-153	Colorectal cancer	Colorectal cancer || ||	TRUE	MedicineITLab	0.0827145	828	2.52849e-25	GNPTG	TRUE	reported	finn-pQTL-s-R10-seq_10666_7	2	TRUE	0.122411	115.215	143.937	115.59
rs10273103	G	A	G	A	0.530855	-0.041	0.115338	0.12	FALSE	FALSE	FALSE	ukb-saige-153	7	83009942	0.033	387318	0.22	Colorectal cancer || id:ukb-saige-153	Colorectal cancer	Colorectal cancer || ||	TRUE	MedicineITLab	0.0747201	828	2.60777e-12	SEMA3E	TRUE	reported	finn-pQTL-s-R10-seq_10670_26	2	TRUE	0.0575084	50.4004	143.937	50.4751
rs1130866	A	G	A	G	-0.541841	-0.018	0.497585	0.52	FALSE	FALSE	FALSE	ukb-saige-153	2	85893741	0.021	387318	0.4	Colorectal cancer || id:ukb-saige-153	Colorectal cancer	Colorectal cancer || ||	TRUE	MedicineITLab	0.0464691	828	3.41763e-29	SFTPB	TRUE	reported	finn-pQTL-s-R10-seq_10672_75	2	TRUE	0.146792	142.111	143.937	135.961
rs4363	A	G	A	G	-0.704496	0.031	0.450483	0.48	FALSE	FALSE	FALSE	ukb-saige-153	17	61574492	0.021	387318	0.15	Colorectal cancer || id:ukb-saige-153	Colorectal cancer	Colorectal cancer || ||	TRUE	MedicineITLab	0.0427679	828	6.25527e-53	ACE	TRUE	reported	finn-pQTL-s-R10-seq_10714_7	2	TRUE	0.245723	269.089	143.937	271.345
rs11022114	A	G	A	G	0.286004	-0.046	0.353865	0.31	FALSE	FALSE	FALSE	ukb-saige-153	11	12038874	0.023	387318	0.049	Colorectal cancer || id:ukb-saige-153	Colorectal cancer	Colorectal cancer || ||	TRUE	MedicineITLab	0.0513906	828	3.53765e-08	DKK3	TRUE	reported	finn-pQTL-s-R10-seq_10746_24	2	TRUE	0.0374055	32.0975	143.937	30.9725
rs7644362	A	G	A	G	-0.677185	0.016	0.799517	0.83	FALSE	FALSE	FALSE	ukb-saige-153	3	71829242	0.028	387318	0.56	Colorectal cancer || id:ukb-saige-153	Colorectal cancer	Colorectal cancer || ||	TRUE	MedicineITLab	0.0580653	828	3.34139e-29	PROK2	TRUE	reported	finn-pQTL-s-R10-seq_10754_113	2	TRUE	0.147011	142.36	143.937	136.013
rs12669944	A	G	A	G	0.29709	0.014	0.291667	0.35	FALSE	FALSE	FALSE	ukb-saige-153	7	100446365	0.023	387318	0.54	Colorectal cancer || id:ukb-saige-153	Colorectal cancer	Colorectal cancer || ||	TRUE	MedicineITLab	0.0539868	828	4.98324e-08	PILRA	TRUE	reported	finn-pQTL-s-R10-seq_10816_150	2	TRUE	0.0364696	31.2641	143.937	30.2831
rs7384878	T	C	T	C	-1.1173	0.018	0.698068	0.68	FALSE	FALSE	FALSE	ukb-saige-153	7	99932049	0.023	387318	0.42	Colorectal cancer || id:ukb-saige-153	Colorectal cancer	Colorectal cancer || ||	TRUE	MedicineITLab	0.0356128	828	6.85855e-143	PILRA	TRUE	reported	finn-pQTL-s-R10-seq_10816_150	2	TRUE	0.526231	917.466	143.937	984.3
rs1050239	A	G	A	G	-0.355494	-0.038	0.224034	0.24	FALSE	FALSE	FALSE	ukb-saige-153	11	6415463	0.025	387318	0.12	Colorectal cancer || id:ukb-saige-153	Colorectal cancer	Colorectal cancer || ||	TRUE	MedicineITLab	0.0579795	828	1.34909e-09	SMPD1	TRUE	reported	finn-pQTL-s-R10-seq_10818_36	2	TRUE	0.0439391	37.9617	143.937	37.5937
rs112379232	T	C	T	C	-1.39653	0.033	0.0259662	0.041	FALSE	FALSE	FALSE	ukb-saige-153	18	29195986	0.054	387318	0.54	Colorectal cancer || id:ukb-saige-153	Colorectal cancer	Colorectal cancer || ||	TRUE	MedicineITLab	0.141406	828	8.08503e-22	B4GALT6	TRUE	reported	finn-pQTL-s-R10-seq_10832_24	2	TRUE	0.0986536	90.4068	143.937	97.536
rs4740	A	G	A	G	-1.04982	0.029	0.324879	0.28	FALSE	FALSE	FALSE	ukb-saige-153	19	4236996	0.024	387318	0.23	Colorectal cancer || id:ukb-saige-153	Colorectal cancer	Colorectal cancer || ||	TRUE	MedicineITLab	0.0365883	828	3.66632e-126	EBI3	TRUE	reported	finn-pQTL-s-R10-seq_10851_77	2	TRUE	0.483463	773.11	143.937	823.276
rs28573806	C	T	C	T	-1.0995	0.036	0.38587	0.4	FALSE	FALSE	FALSE	ukb-saige-153	22	50727792	0.022	387318	0.099	Colorectal cancer || id:ukb-saige-153	Colorectal cancer	Colorectal cancer || ||	TRUE	MedicineITLab	0.0307105	828	3.32531e-170	PLXNB2	TRUE	reported	finn-pQTL-s-R10-seq_10855_55	2	TRUE	0.572957	1108.23	143.937	1281.79
rs738490	A	G	A	G	0.334429	-0.0099	0.195652	0.16	FALSE	FALSE	FALSE	ukb-saige-153	22	50530651	0.029	387318	0.73	Colorectal cancer || id:ukb-saige-153	Colorectal cancer	Colorectal cancer || ||	TRUE	MedicineITLab	0.0605555	828	4.47356e-08	PLXNB2	TRUE	reported	finn-pQTL-s-R10-seq_10855_55	2	TRUE	0.0352019	30.1377	143.937	30.5001
rs58330611	A	C	A	C	0.413916	0.071	0.632246	0.6	FALSE	FALSE	FALSE	ukb-saige-153	5	39023193	0.022	387318	0.001	Colorectal cancer || id:ukb-saige-153	Colorectal cancer	Colorectal cancer || ||	TRUE	MedicineITLab	0.0489048	828	1.17253e-16	OSMR	TRUE	reported	finn-pQTL-s-R10-seq_10892_8	2	TRUE	0.0796706	71.5047	143.937	71.6344
rs116924511	T	G	T	G	-1.46014	-0.034	0.022343	0.024	FALSE	FALSE	FALSE	ukb-saige-153	17	4285389	0.07	387318	0.63	Colorectal cancer || id:ukb-saige-153	Colorectal cancer	Colorectal cancer || ||	TRUE	MedicineITLab	0.160419	828	6.51959e-19	CYB5D2	TRUE	reported	finn-pQTL-s-R10-seq_10924_258	2	TRUE	0.0931423	84.8375	143.937	82.8471
rs4328477	G	A	G	A	0.392626	0.02	0.184179	0.21	FALSE	FALSE	FALSE	ukb-saige-153	17	4011602	0.026	387318	0.45	Colorectal cancer || id:ukb-saige-153	Colorectal cancer	Colorectal cancer || ||	TRUE	MedicineITLab	0.0627536	828	6.31054e-10	CYB5D2	TRUE	reported	finn-pQTL-s-R10-seq_10924_258	2	TRUE	0.0463258	40.1239	143.937	39.1454
rs4917	C	T	C	T	-1.09181	-0.0092	0.615942	0.64	FALSE	FALSE	FALSE	ukb-saige-153	3	186337713	0.022	387318	0.68	Colorectal cancer || id:ukb-saige-153	Colorectal cancer	Colorectal cancer || ||	TRUE	MedicineITLab	0.0316393	828	2.78099e-162	AHSG	TRUE	reported	finn-pQTL-s-R10-seq_10966_1	2	TRUE	0.563976	1068.39	143.937	1190.8
rs4859610	G	A	G	A	-0.395339	0.0022	0.751208	0.77	FALSE	FALSE	FALSE	ukb-saige-153	4	77000441	0.025	387318	0.93	Colorectal cancer || id:ukb-saige-153	Colorectal cancer	Colorectal cancer || ||	TRUE	MedicineITLab	0.0539392	828	5.51249e-13	ART3	TRUE	reported	finn-pQTL-s-R10-seq_10970_3	2	TRUE	0.0584206	51.2494	143.937	53.7193
rs59179092	C	G	C	G	-2.01378	0.22	0.013285	0.0056	FALSE	TRUE	FALSE	ukb-saige-153	5	147690030	0.14	387318	0.13	Colorectal cancer || id:ukb-saige-153	Colorectal cancer	Colorectal cancer || ||	TRUE	MedicineITLab	0.204512	828	1.04895e-21	SPINK7	TRUE	reported	finn-pQTL-s-R10-seq_10974_20	2	TRUE	0.106318	98.2663	143.937	96.9586
rs7803865	G	A	G	A	0.491302	0.016	0.482488	0.47	FALSE	FALSE	FALSE	ukb-saige-153	7	100505792	0.021	387318	0.46	Colorectal cancer || id:ukb-saige-153	Colorectal cancer	Colorectal cancer || ||	TRUE	MedicineITLab	0.0472787	828	7.41483e-24	ACHE	TRUE	reported	finn-pQTL-s-R10-seq_10980_11	2	TRUE	0.120541	113.214	143.937	107.986
rs2868371	G	C	G	C	-0.58935	0.013	0.22343	0.24	FALSE	TRUE	FALSE	ukb-saige-153	7	75930759	0.025	387318	0.59	Colorectal cancer || id:ukb-saige-153	Colorectal cancer	Colorectal cancer || ||	TRUE	MedicineITLab	0.0545537	828	1.54309e-25	HSPB1	TRUE	reported	finn-pQTL-s-R10-seq_11103_24	2	TRUE	0.120531	113.203	143.937	116.707
rs12141494	A	G	A	G	-0.841216	0.014	0.533816	0.52	FALSE	FALSE	FALSE	ukb-saige-153	1	203151425	0.021	387318	0.51	Colorectal cancer || id:ukb-saige-153	Colorectal cancer	Colorectal cancer || ||	TRUE	MedicineITLab	0.0397884	828	1.22763e-79	CHI3L1	TRUE	reported	finn-pQTL-s-R10-seq_11104_13	2	TRUE	0.352204	449.092	143.937	446.994
rs12344549	T	C	T	C	0.689073	-0.03	0.0809179	0.069	FALSE	FALSE	FALSE	ukb-saige-153	9	113175910	0.042	387318	0.48	Colorectal cancer || id:ukb-saige-153	Colorectal cancer	Colorectal cancer || ||	TRUE	MedicineITLab	0.0857243	828	3.14515e-15	SVEP1	TRUE	reported	finn-pQTL-s-R10-seq_11109_56	2	TRUE	0.0706251	62.7695	143.937	64.6134
rs989128	A	G	A	G	-0.682988	0.054	0.292874	0.37	FALSE	FALSE	FALSE	ukb-saige-153	17	48636534	0.022	387318	0.016	Colorectal cancer || id:ukb-saige-153	Colorectal cancer	Colorectal cancer || ||	TRUE	MedicineITLab	0.0471575	828	1.57982e-42	SPATA20	TRUE	reported	finn-pQTL-s-R10-seq_11117_2	2	TRUE	0.193212	197.813	143.937	209.761
rs10753177	T	C	T	C	0.588837	0.069	0.941425	0.92	FALSE	FALSE	FALSE	ukb-saige-153	1	178008473	0.039	387318	0.077	Colorectal cancer || id:ukb-saige-153	Colorectal cancer	Colorectal cancer || ||	TRUE	MedicineITLab	0.104884	828	2.69765e-08	ANGPTL1	TRUE	reported	finn-pQTL-s-R10-seq_11142_11	2	TRUE	0.03824	32.8421	143.937	31.5189
rs4650998	A	G	A	G	-0.497798	-0.028	0.470411	0.53	FALSE	FALSE	FALSE	ukb-saige-153	1	178531850	0.021	387318	0.19	Colorectal cancer || id:ukb-saige-153	Colorectal cancer	Colorectal cancer || ||	TRUE	MedicineITLab	0.0462655	828	2.33639e-25	ANGPTL1	TRUE	reported	finn-pQTL-s-R10-seq_11142_11	2	TRUE	0.123468	116.35	143.937	115.769
rs2753408	A	G	A	G	-0.67162	0.0043	0.483696	0.45	FALSE	FALSE	FALSE	ukb-saige-153	11	33399691	0.022	387318	0.85	Colorectal cancer || id:ukb-saige-153	Colorectal cancer	Colorectal cancer || ||	TRUE	MedicineITLab	0.0436606	828	3.84458e-47	KIAA1549L	TRUE	reported	finn-pQTL-s-R10-seq_11145_72	2	TRUE	0.225297	240.215	143.937	236.629
rs2150458	A	G	A	G	0.444182	0.008	0.469203	0.43	FALSE	FALSE	FALSE	ukb-saige-153	21	47377296	0.022	387318	0.71	Colorectal cancer || id:ukb-saige-153	Colorectal cancer	Colorectal cancer || ||	TRUE	MedicineITLab	0.0478481	828	1.41515e-19	COL6A1	TRUE	reported	finn-pQTL-s-R10-seq_11150_3	2	TRUE	0.0982746	90.0216	143.937	86.1772
rs2569459	T	C	T	C	-0.472033	-0.018	0.358092	0.35	FALSE	FALSE	FALSE	ukb-saige-153	19	51539433	0.022	387318	0.43	Colorectal cancer || id:ukb-saige-153	Colorectal cancer	Colorectal cancer || ||	TRUE	MedicineITLab	0.0483174	828	2.08367e-21	KLK13	TRUE	reported	finn-pQTL-s-R10-seq_11152_46	2	TRUE	0.102434	94.2661	143.937	95.4416
rs61751937	C	G	C	G	1.01338	0.024	0.0350242	0.029	FALSE	TRUE	FALSE	ukb-saige-153	9	113312231	0.063	387318	0.71	Colorectal cancer || id:ukb-saige-153	Colorectal cancer	Colorectal cancer || ||	TRUE	MedicineITLab	0.124318	828	1.32848e-15	SVEP1	TRUE	reported	finn-pQTL-s-R10-seq_11178_21	2	TRUE	0.069416	61.6146	143.937	66.4472
rs7020788	A	G	A	G	0.306161	0.0027	0.374396	0.36	FALSE	FALSE	FALSE	ukb-saige-153	9	113232979	0.022	387318	0.91	Colorectal cancer || id:ukb-saige-153	Colorectal cancer	Colorectal cancer || ||	TRUE	MedicineITLab	0.0500826	828	1.50524e-09	SVEP1	TRUE	reported	finn-pQTL-s-R10-seq_11178_21	2	TRUE	0.0439097	37.9351	143.937	37.3702
rs607567	G	T	G	T	-1.10554	-0.026	0.592995	0.64	FALSE	FALSE	FALSE	ukb-saige-153	12	10131684	0.022	387318	0.25	Colorectal cancer || id:ukb-saige-153	Colorectal cancer	Colorectal cancer || ||	TRUE	MedicineITLab	0.0301154	828	1.00393e-175	CLEC12A	TRUE	reported	finn-pQTL-s-R10-seq_11187_11	2	TRUE	0.58997	1188.49	143.937	1347.63
rs7967565	C	G	C	G	-0.439944	-0.022	0.112319	0.1	FALSE	TRUE	FALSE	ukb-saige-153	12	10089593	0.035	387318	0.53	Colorectal cancer || id:ukb-saige-153	Colorectal cancer	Colorectal cancer || ||	TRUE	MedicineITLab	0.0751366	828	6.86971e-09	CLEC12A	TRUE	reported	finn-pQTL-s-R10-seq_11187_11	2	TRUE	0.0385953	33.1596	143.937	34.284
rs12599777	G	A	G	A	-0.475122	0.0032	0.13285	0.18	FALSE	FALSE	FALSE	ukb-saige-153	16	5079466	0.028	387318	0.91	Colorectal cancer || id:ukb-saige-153	Colorectal cancer	Colorectal cancer || ||	TRUE	MedicineITLab	0.0732382	828	1.50381e-10	NAGPA	TRUE	reported	finn-pQTL-s-R10-seq_11208_15	2	TRUE	0.0520111	45.3182	143.937	42.0857
rs17349172	C	T	C	T	-0.41647	-0.016	0.21256	0.25	FALSE	FALSE	FALSE	ukb-saige-153	10	93665816	0.025	387318	0.51	Colorectal cancer || id:ukb-saige-153	Colorectal cancer	Colorectal cancer || ||	TRUE	MedicineITLab	0.0593258	828	4.62895e-12	FGFBP3	TRUE	reported	finn-pQTL-s-R10-seq_11219_95	2	TRUE	0.0580626	50.916	143.937	49.2811
rs10896996	A	C	A	C	0.337774	0.029	0.283816	0.27	FALSE	FALSE	FALSE	ukb-saige-153	11	59665308	0.024	387318	0.22	Colorectal cancer || id:ukb-saige-153	Colorectal cancer	Colorectal cancer || ||	TRUE	MedicineITLab	0.0530319	828	3.15075e-10	TCN1	TRUE	reported	finn-pQTL-s-R10-seq_11232_46	2	TRUE	0.0463814	40.1744	143.937	40.5675
rs2424961	T	C	T	C	-0.448871	-0.019	0.536836	0.58	FALSE	FALSE	FALSE	ukb-saige-153	20	31694060	0.022	387318	0.39	Colorectal cancer || id:ukb-saige-153	Colorectal cancer	Colorectal cancer || ||	TRUE	MedicineITLab	0.0469691	828	1.34626e-20	BPIFB1	TRUE	reported	finn-pQTL-s-R10-seq_11246_3	2	TRUE	0.100196	91.9775	143.937	91.3311
rs34914923	T	G	T	G	-0.449057	0.06	0.222222	0.26	FALSE	FALSE	FALSE	ukb-saige-153	4	17511949	0.024	387318	0.014	Colorectal cancer || id:ukb-saige-153	Colorectal cancer	Colorectal cancer || ||	TRUE	MedicineITLab	0.0578818	828	2.53919e-14	QDPR	TRUE	reported	finn-pQTL-s-R10-seq_11257_1	2	TRUE	0.0697069	61.8922	143.937	60.1892
rs144092339	T	C	T	C	0.573774	-0.074	0.123792	0.036	FALSE	FALSE	FALSE	ukb-saige-153	6	33160217	0.059	387318	0.21	Colorectal cancer || id:ukb-saige-153	Colorectal cancer	Colorectal cancer || ||	TRUE	MedicineITLab	0.0726647	828	9.14315e-15	COL11A2	TRUE	reported	finn-pQTL-s-R10-seq_11278_4	2	TRUE	0.0714186	63.5289	143.937	62.3498
rs2235256	G	A	G	A	-0.281746	-0.011	0.506643	0.44	FALSE	FALSE	FALSE	ukb-saige-153	1	175569047	0.022	387318	0.63	Colorectal cancer || id:ukb-saige-153	Colorectal cancer	Colorectal cancer || ||	TRUE	MedicineITLab	0.0481293	828	6.92192e-09	TNR	TRUE	reported	finn-pQTL-s-R10-seq_11302_237	2	TRUE	0.0396834	34.133	143.937	34.2686
rs140521	A	C	A	C	0.361242	0.022	0.785628	0.7	FALSE	FALSE	FALSE	ukb-saige-153	22	50978024	0.023	387318	0.34	Colorectal cancer || id:ukb-saige-153	Colorectal cancer	Colorectal cancer || ||	TRUE	MedicineITLab	0.0588035	828	1.25623e-09	TYMP	TRUE	reported	finn-pQTL-s-R10-seq_11361_73	2	TRUE	0.0439553	37.9764	143.937	37.739
rs77324539	G	A	G	A	-0.62272	0.047	0.130435	0.096	FALSE	FALSE	FALSE	ukb-saige-153	4	100383696	0.036	387318	0.19	Colorectal cancer || id:ukb-saige-153	Colorectal cancer	Colorectal cancer || ||	TRUE	MedicineITLab	0.0697428	828	2.74991e-18	ADH7	TRUE	reported	finn-pQTL-s-R10-seq_11377_19	2	TRUE	0.0879654	79.6674	143.937	79.7236
rs6449	T	C	T	C	0.294438	0.0045	0.300725	0.27	FALSE	FALSE	FALSE	ukb-saige-153	6	32006655	0.024	387318	0.85	Colorectal cancer || id:ukb-saige-153	Colorectal cancer	Colorectal cancer || ||	TRUE	MedicineITLab	0.0513909	828	1.41181e-08	ATF6B	TRUE	reported	finn-pQTL-s-R10-seq_11387_3	2	TRUE	0.0364616	31.2569	143.937	32.8258
rs13280153	A	C	A	C	0.451553	0.0091	0.415459	0.41	FALSE	FALSE	FALSE	ukb-saige-153	8	61197179	0.022	387318	0.68	Colorectal cancer || id:ukb-saige-153	Colorectal cancer	Colorectal cancer || ||	TRUE	MedicineITLab	0.0477331	828	3.11308e-20	CA8	TRUE	reported	finn-pQTL-s-R10-seq_11390_24	2	TRUE	0.0990354	90.7952	143.937	89.4908
rs11555096	T	C	T	C	-1.73952	-0.12	0.0307971	0.019	FALSE	FALSE	FALSE	ukb-saige-153	15	80472526	0.077	387318	0.11	Colorectal cancer || id:ukb-saige-153	Colorectal cancer	Colorectal cancer || ||	TRUE	MedicineITLab	0.128103	828	4.6662e-38	FAH	TRUE	reported	finn-pQTL-s-R10-seq_11424_4	2	TRUE	0.18064	182.104	143.937	184.391
rs10854688	T	C	T	C	0.443337	0.012	0.682971	0.69	FALSE	FALSE	FALSE	ukb-saige-153	22	36653854	0.023	387318	0.6	Colorectal cancer || id:ukb-saige-153	Colorectal cancer	Colorectal cancer || ||	TRUE	MedicineITLab	0.0508758	828	1.58638e-17	APOL1	TRUE	reported	finn-pQTL-s-R10-seq_11510_31	2	TRUE	0.0851136	76.8444	143.937	75.9356
rs136148	T	C	T	C	0.601692	0.012	0.682367	0.69	FALSE	FALSE	FALSE	ukb-saige-153	22	36652931	0.023	387318	0.61	Colorectal cancer || id:ukb-saige-153	Colorectal cancer	Colorectal cancer || ||	TRUE	MedicineITLab	0.0487264	828	2.87383e-32	APOL1	TRUE	reported	finn-pQTL-s-R10-seq_11510_51	2	TRUE	0.156936	153.759	143.937	152.482
rs1545223	G	A	G	A	-0.283814	-0.03	0.474034	0.31	FALSE	FALSE	FALSE	ukb-saige-153	2	88423510	0.023	387318	0.2	Colorectal cancer || id:ukb-saige-153	Colorectal cancer	Colorectal cancer || ||	TRUE	MedicineITLab	0.047643	828	3.7975e-09	FABP1	TRUE	reported	finn-pQTL-s-R10-seq_11516_7	2	TRUE	0.0401666	34.566	143.937	35.487
rs9839475	A	G	A	G	0.289901	0.0047	0.378623	0.35	FALSE	FALSE	FALSE	ukb-saige-153	3	3807778	0.022	387318	0.83	Colorectal cancer || id:ukb-saige-153	Colorectal cancer	Colorectal cancer || ||	TRUE	MedicineITLab	0.0489805	828	4.7533e-09	LRRN1	TRUE	reported	finn-pQTL-s-R10-seq_11586_2	2	TRUE	0.039545	34.0091	143.937	35.031
rs2240803	A	G	A	G	0.519931	0.02	0.208333	0.16	FALSE	FALSE	FALSE	ukb-saige-153	6	30920957	0.029	387318	0.49	Colorectal cancer || id:ukb-saige-153	Colorectal cancer	Colorectal cancer || ||	TRUE	MedicineITLab	0.0570683	828	6.06636e-19	DDR1	TRUE	reported	finn-pQTL-s-R10-seq_11836_144	2	TRUE	0.0891707	80.8658	143.937	83.0045
rs9394050	A	G	A	G	0.416279	-0.066	0.128019	0.13	FALSE	FALSE	FALSE	ukb-saige-153	6	31248643	0.032	387318	0.041	Colorectal cancer || id:ukb-saige-153	Colorectal cancer	Colorectal cancer || ||	TRUE	MedicineITLab	0.0727864	828	1.49586e-08	DDR1	TRUE	reported	finn-pQTL-s-R10-seq_11836_144	2	TRUE	0.0386884	33.2427	143.937	32.7091
rs115868895	A	G	A	G	-1.13907	0.052	0.044686	0.048	FALSE	FALSE	FALSE	ukb-saige-153	17	80297381	0.05	387318	0.3	Colorectal cancer || id:ukb-saige-153	Colorectal cancer	Colorectal cancer || ||	TRUE	MedicineITLab	0.113373	828	1.73856e-22	CD7	TRUE	reported	finn-pQTL-s-R10-seq_12008_3	2	TRUE	0.110777	102.901	143.937	100.944
rs3925123	C	T	C	T	0.290627	0.01	0.410024	0.4	FALSE	FALSE	FALSE	ukb-saige-153	2	89090866	0.022	387318	0.65	Colorectal cancer || id:ukb-saige-153	Colorectal cancer	Colorectal cancer || ||	TRUE	MedicineITLab	0.0493636	828	5.70019e-09	RPIA	TRUE	reported	finn-pQTL-s-R10-seq_12333_87	2	TRUE	0.0408644	35.1921	143.937	34.6624
rs638416	C	G	C	G	0.429127	0.018	0.64372	0.63	FALSE	TRUE	FALSE	ukb-saige-153	17	18266975	0.022	387318	0.4	Colorectal cancer || id:ukb-saige-153	Colorectal cancer	Colorectal cancer || ||	TRUE	MedicineITLab	0.048032	828	2.63052e-18	SHMT1	TRUE	reported	finn-pQTL-s-R10-seq_12334_25	2	TRUE	0.0844676	76.2073	143.937	79.8197
rs56243479	T	C	T	C	-0.708069	-0.0056	0.0386473	0.029	FALSE	FALSE	FALSE	ukb-saige-153	5	38298721	0.066	387318	0.93	Colorectal cancer || id:ukb-saige-153	Colorectal cancer	Colorectal cancer || ||	TRUE	MedicineITLab	0.125643	828	2.39387e-08	EGFLAM	TRUE	reported	finn-pQTL-s-R10-seq_12338_27	2	TRUE	0.0372549	31.9633	143.937	31.7596
rs4950811	A	G	A	G	0.480933	-0.0076	0.283816	0.33	FALSE	FALSE	FALSE	ukb-saige-153	1	201961711	0.023	387318	0.74	Colorectal cancer || id:ukb-saige-153	Colorectal cancer	Colorectal cancer || ||	TRUE	MedicineITLab	0.0528914	828	7.04365e-19	RNPEP	TRUE	reported	finn-pQTL-s-R10-seq_12386_11	2	TRUE	0.0940287	85.7287	143.937	82.6797
rs291466	G	A	G	A	0.519874	-0.015	0.617754	0.59	FALSE	FALSE	FALSE	ukb-saige-153	2	191184475	0.022	387318	0.5	Colorectal cancer || id:ukb-saige-153	Colorectal cancer	Colorectal cancer || ||	TRUE	MedicineITLab	0.0485334	828	3.68429e-25	HIBCH	TRUE	reported	finn-pQTL-s-R10-seq_12396_19	2	TRUE	0.127639	120.856	143.937	114.74
rs998247	T	C	T	C	-0.292356	-0.0094	0.398551	0.42	FALSE	FALSE	FALSE	ukb-saige-153	14	65546299	0.022	387318	0.67	Colorectal cancer || id:ukb-saige-153	Colorectal cancer	Colorectal cancer || ||	TRUE	MedicineITLab	0.0493691	828	4.66693e-09	MAX	TRUE	reported	finn-pQTL-s-R10-seq_12411_60	2	TRUE	0.0409767	35.2929	143.937	35.0682
rs4925	A	C	A	C	-0.813288	-0.034	0.286836	0.31	FALSE	FALSE	FALSE	ukb-saige-153	10	106022789	0.023	387318	0.14	Colorectal cancer || id:ukb-saige-153	Colorectal cancer	Colorectal cancer || ||	TRUE	MedicineITLab	0.0453284	828	4.86797e-61	GSTO1	TRUE	reported	finn-pQTL-s-R10-seq_12436_84	2	TRUE	0.270609	306.451	143.937	321.92
rs2608624	T	G	T	G	0.458949	-0.0069	0.628623	0.65	FALSE	FALSE	FALSE	ukb-saige-153	6	52622475	0.022	387318	0.76	Colorectal cancer || id:ukb-saige-153	Colorectal cancer	Colorectal cancer || ||	TRUE	MedicineITLab	0.0489009	828	5.91808e-20	GSTA1	TRUE	reported	finn-pQTL-s-R10-seq_12446_49	2	TRUE	0.0983477	90.0959	143.937	88.0836
rs3738497	T	G	T	G	-1.04363	-0.13	0.0307971	0.00043	FALSE	FALSE	FALSE	ukb-saige-153	1	43213068	0.56	387318	0.81	Colorectal cancer || id:ukb-saige-153	Colorectal cancer	Colorectal cancer || ||	TRUE	MedicineITLab	0.136949	828	6.92887e-14	PPIH	TRUE	reported	finn-pQTL-s-R10-seq_12449_16	2	TRUE	0.0650201	57.4415	143.937	58.0731
rs148212596	G	A	G	A	1.20961	0.027	0.0144928	0.021	FALSE	FALSE	FALSE	ukb-saige-153	1	193074511	0.075	387318	0.72	Colorectal cancer || id:ukb-saige-153	Colorectal cancer	Colorectal cancer || ||	TRUE	MedicineITLab	0.202917	828	3.70932e-09	GLRX2	TRUE	reported	finn-pQTL-s-R10-seq_12486_8	2	TRUE	0.0417958	36.0292	143.937	35.5348
rs4499344	A	G	A	G	0.39771	0.033	0.317029	0.29	FALSE	FALSE	FALSE	ukb-saige-153	19	33073431	0.024	387318	0.17	Colorectal cancer || id:ukb-saige-153	Colorectal cancer	Colorectal cancer || ||	TRUE	MedicineITLab	0.0513304	828	2.73549e-14	PDCD5	TRUE	reported	finn-pQTL-s-R10-seq_12517_52	2	TRUE	0.0684959	60.7379	143.937	60.0321
rs10033662	A	G	A	G	0.561449	0.05	0.644928	0.63	FALSE	FALSE	FALSE	ukb-saige-153	4	95239462	0.022	387318	0.025	Colorectal cancer || id:ukb-saige-153	Colorectal cancer	Colorectal cancer || ||	TRUE	MedicineITLab	0.0477193	828	1.17656e-29	HPGDS	TRUE	reported	finn-pQTL-s-R10-seq_12549_33	2	TRUE	0.14437	139.371	143.937	138.431
rs78625720	A	G	A	G	-1.314	-0.071	0.0199275	0.031	FALSE	FALSE	FALSE	ukb-saige-153	17	73140941	0.062	387318	0.25	Colorectal cancer || id:ukb-saige-153	Colorectal cancer	Colorectal cancer || ||	TRUE	MedicineITLab	0.161111	828	1.28459e-15	NT5C	TRUE	reported	finn-pQTL-s-R10-seq_12560_9	2	TRUE	0.0674422	59.736	143.937	66.5182
rs12764388	A	G	A	G	0.389867	0.011	0.175121	0.11	FALSE	FALSE	FALSE	ukb-saige-153	10	104413385	0.034	387318	0.74	Colorectal cancer || id:ukb-saige-153	Colorectal cancer	Colorectal cancer || ||	TRUE	MedicineITLab	0.0647874	828	2.65842e-09	ARL3	TRUE	reported	finn-pQTL-s-R10-seq_12571_14	2	TRUE	0.0439128	37.938	143.937	36.2119
rs17783344	G	T	G	T	-0.466549	0.023	0.115338	0.14	FALSE	FALSE	FALSE	ukb-saige-153	2	163208893	0.031	387318	0.47	Colorectal cancer || id:ukb-saige-153	Colorectal cancer	Colorectal cancer || ||	TRUE	MedicineITLab	0.0747758	828	7.01479e-10	GCA	TRUE	reported	finn-pQTL-s-R10-seq_12594_5	2	TRUE	0.0444196	38.3961	143.937	38.9289
rs74849041	T	C	T	C	-1.46184	0.27	0.0368357	0.00049	FALSE	FALSE	FALSE	ukb-saige-153	14	24029037	0.74	387318	0.72	Colorectal cancer || id:ukb-saige-153	Colorectal cancer	Colorectal cancer || ||	TRUE	MedicineITLab	0.120497	828	2.75378e-31	AP1G2	TRUE	reported	finn-pQTL-s-R10-seq_12714_38	2	TRUE	0.151635	147.637	143.937	147.179
rs12036504	C	T	C	T	-0.467604	-0.0022	0.102053	0.045	FALSE	FALSE	FALSE	ukb-saige-153	1	117355344	0.052	387318	0.96	Colorectal cancer || id:ukb-saige-153	Colorectal cancer	Colorectal cancer || ||	TRUE	MedicineITLab	0.0782959	828	3.47373e-09	PTGFRN	TRUE	reported	finn-pQTL-s-R10-seq_12727_7	2	TRUE	0.040074	34.483	143.937	35.668
rs4233450	T	G	T	G	0.76773	-0.0077	0.759662	0.83	FALSE	FALSE	FALSE	ukb-saige-153	1	117490261	0.029	387318	0.79	Colorectal cancer || id:ukb-saige-153	Colorectal cancer	Colorectal cancer || ||	TRUE	MedicineITLab	0.0504956	828	3.27015e-46	PTGFRN	TRUE	reported	finn-pQTL-s-R10-seq_12727_7	2	TRUE	0.215224	226.529	143.937	231.159
rs11125524	C	T	C	T	0.278455	-0.0092	0.544082	0.49	FALSE	FALSE	FALSE	ukb-saige-153	2	54379533	0.021	387318	0.67	Colorectal cancer || id:ukb-saige-153	Colorectal cancer	Colorectal cancer || ||	TRUE	MedicineITLab	0.0492943	828	2.22301e-08	ACYP2	TRUE	reported	finn-pQTL-s-R10-seq_12812_25	2	TRUE	0.0384672	33.0451	143.937	31.9093
rs148995802	A	C	A	C	1.14909	0.14	0.0144928	0.0063	FALSE	FALSE	FALSE	ukb-saige-153	1	154266593	0.14	387318	0.31	Colorectal cancer || id:ukb-saige-153	Colorectal cancer	Colorectal cancer || ||	TRUE	MedicineITLab	0.194818	828	5.35315e-09	S100A6	TRUE	reported	finn-pQTL-s-R10-seq_13090_17	2	TRUE	0.0377181	32.3764	143.937	34.7896
rs41265164	A	G	A	G	0.888298	0.034	0.0434783	0.049	FALSE	FALSE	FALSE	ukb-saige-153	1	153520203	0.05	387318	0.49	Colorectal cancer || id:ukb-saige-153	Colorectal cancer	Colorectal cancer || ||	TRUE	MedicineITLab	0.114	828	1.97813e-14	S100A6	TRUE	reported	finn-pQTL-s-R10-seq_13090_17	2	TRUE	0.0656319	58.0199	143.937	60.7166
rs11077986	A	G	A	G	0.345532	-0.018	0.454106	0.52	FALSE	FALSE	FALSE	ukb-saige-153	17	80280865	0.022	387318	0.4	Colorectal cancer || id:ukb-saige-153	Colorectal cancer	Colorectal cancer || ||	TRUE	MedicineITLab	0.0466635	828	3.24277e-13	SECTM1	TRUE	reported	finn-pQTL-s-R10-seq_13093_6	2	TRUE	0.0591932	51.9699	143.937	54.8305
rs283898	G	A	G	A	0.528887	-0.044	0.90942	0.92	FALSE	FALSE	FALSE	ukb-saige-153	2	79328687	0.04	387318	0.27	Colorectal cancer || id:ukb-saige-153	Colorectal cancer	Colorectal cancer || ||	TRUE	MedicineITLab	0.0828898	828	2.9362e-10	REG1A	TRUE	reported	finn-pQTL-s-R10-seq_13095_51	2	TRUE	0.0460843	39.9046	143.937	40.7121
rs73554000	C	G	C	G	1.00058	-0.035	0.0978261	0.018	FALSE	TRUE	FALSE	ukb-saige-153	19	43825494	0.08	387318	0.66	Colorectal cancer || id:ukb-saige-153	Colorectal cancer	Colorectal cancer || ||	TRUE	MedicineITLab	0.0750254	828	6.88098e-37	CD177	TRUE	reported	finn-pQTL-s-R10-seq_13116_25	2	TRUE	0.176717	177.3	143.937	177.864
rs78530667	C	T	C	T	-0.568604	0.027	0.131039	0.13	FALSE	FALSE	FALSE	ukb-saige-153	19	43900697	0.033	387318	0.41	Colorectal cancer || id:ukb-saige-153	Colorectal cancer	Colorectal cancer || ||	TRUE	MedicineITLab	0.0690229	828	6.83614e-16	CD177	TRUE	reported	finn-pQTL-s-R10-seq_13116_25	2	TRUE	0.0736293	65.6517	143.937	67.8631
rs2232700	A	T	A	T	0.928814	-0.0047	0.179952	0.16	FALSE	TRUE	FALSE	ukb-saige-153	14	94756450	0.029	387318	0.87	Colorectal cancer || id:ukb-saige-153	Colorectal cancer	Colorectal cancer || ||	TRUE	MedicineITLab	0.0567368	828	2.22055e-52	SERPINA10	TRUE	reported	finn-pQTL-s-R10-seq_13119_26	2	TRUE	0.254615	282.152	143.937	267.996
rs7150486	G	A	G	A	-0.352014	0.016	0.255435	0.23	FALSE	FALSE	FALSE	ukb-saige-153	14	85933153	0.026	387318	0.54	Colorectal cancer || id:ukb-saige-153	Colorectal cancer	Colorectal cancer || ||	TRUE	MedicineITLab	0.0536152	828	9.15513e-11	FLRT2	TRUE	reported	finn-pQTL-s-R10-seq_13122_19	2	TRUE	0.0471338	40.8584	143.937	43.1066
rs1932953	T	G	T	G	0.899815	-0.051	0.262077	0.25	FALSE	FALSE	FALSE	ukb-saige-153	20	14673838	0.025	387318	0.039	Colorectal cancer || id:ukb-saige-153	Colorectal cancer	Colorectal cancer || ||	TRUE	MedicineITLab	0.0467102	828	1.38801e-68	FLRT3	TRUE	reported	finn-pQTL-s-R10-seq_13123_3	2	TRUE	0.313167	376.622	143.937	371.093
rs704	A	G	A	G	1.14808	-0.0039	0.416063	0.47	FALSE	FALSE	FALSE	ukb-saige-153	17	26694861	0.021	387318	0.86	Colorectal cancer || id:ukb-saige-153	Colorectal cancer	Colorectal cancer || ||	TRUE	MedicineITLab	0.0314005	828	7.90523e-175	VTN	TRUE	reported	finn-pQTL-s-R10-seq_13125_45	2	TRUE	0.640471	1471.45	143.937	1336.81
rs17329170	A	G	A	G	1.45776	-0.035	0.0495169	0.099	FALSE	FALSE	FALSE	ukb-saige-153	5	9547242	0.036	387318	0.33	Colorectal cancer || id:ukb-saige-153	Colorectal cancer	Colorectal cancer || ||	TRUE	MedicineITLab	0.10304	828	7.55831e-41	SEMA5A	TRUE	reported	finn-pQTL-s-R10-seq_13132_14	2	TRUE	0.200032	206.542	143.937	200.152
rs6235	G	C	G	C	-1.0365	-0.0091	0.288647	0.27	FALSE	TRUE	FALSE	ukb-saige-153	5	95728898	0.024	387318	0.71	Colorectal cancer || id:ukb-saige-153	Colorectal cancer	Colorectal cancer || ||	TRUE	MedicineITLab	0.0384589	828	2.77148e-115	PCSK1	TRUE	reported	finn-pQTL-s-R10-seq_13388_57	2	TRUE	0.441185	652.128	143.937	726.348
rs7225465	A	G	A	G	-0.597976	0.00018	0.686594	0.67	FALSE	FALSE	FALSE	ukb-saige-153	17	48916159	0.023	387318	0.99	Colorectal cancer || id:ukb-saige-153	Colorectal cancer	Colorectal cancer || ||	TRUE	MedicineITLab	0.0492874	828	2.73291e-31	WFIKKN2	TRUE	reported	finn-pQTL-s-R10-seq_13408_23	2	TRUE	0.153888	150.23	143.937	147.196
rs78720782	T	A	T	A	0.834459	-0.074	0.112319	0.056	FALSE	TRUE	FALSE	ukb-saige-153	18	44664015	0.046	387318	0.11	Colorectal cancer || id:ukb-saige-153	Colorectal cancer	Colorectal cancer || ||	TRUE	MedicineITLab	0.070013	828	2.47386e-30	HDHD2	TRUE	reported	finn-pQTL-s-R10-seq_13472_35	2	TRUE	0.138851	133.184	143.937	142.054
rs184716813	C	T	C	T	-1.54539	0.039	0.0108696	0.021	FALSE	FALSE	FALSE	ukb-saige-153	9	114151247	0.076	387318	0.61	Colorectal cancer || id:ukb-saige-153	Colorectal cancer	Colorectal cancer || ||	TRUE	MedicineITLab	0.232265	828	5.20595e-11	PTGR1	TRUE	reported	finn-pQTL-s-R10-seq_13543_7	2	TRUE	0.0513539	44.7146	143.937	44.2699
rs415895	G	C	G	C	-0.398794	0.00096	0.722826	0.65	FALSE	TRUE	FALSE	ukb-saige-153	11	9769562	0.022	387318	0.97	Colorectal cancer || id:ukb-saige-153	Colorectal cancer	Colorectal cancer || ||	TRUE	MedicineITLab	0.0525709	828	8.90369e-14	SWAP70	TRUE	reported	finn-pQTL-s-R10-seq_13552_7	2	TRUE	0.0637255	56.2199	143.937	57.5448
rs117399000	A	G	A	G	-0.608102	0.027	0.0736715	0.032	FALSE	FALSE	FALSE	ukb-saige-153	17	50213731	0.061	387318	0.66	Colorectal cancer || id:ukb-saige-153	Colorectal cancer	Colorectal cancer || ||	TRUE	MedicineITLab	0.0921224	828	7.29785e-11	CA10	TRUE	reported	finn-pQTL-s-R10-seq_13666_222	2	TRUE	0.0504716	43.9056	143.937	43.5735
rs17050272	A	G	A	G	0.395225	-0.025	0.541667	0.41	FALSE	FALSE	FALSE	ukb-saige-153	2	121306440	0.022	387318	0.24	Colorectal cancer || id:ukb-saige-153	Colorectal cancer	Colorectal cancer || ||	TRUE	MedicineITLab	0.0490797	828	2.81847e-15	INHBB	TRUE	reported	finn-pQTL-s-R10-seq_13676_46	2	TRUE	0.077559	69.4502	143.937	64.8463
rs6800335	T	C	T	C	0.462116	-0.058	0.266304	0.31	FALSE	FALSE	FALSE	ukb-saige-153	3	3144765	0.023	387318	0.013	Colorectal cancer || id:ukb-saige-153	Colorectal cancer	Colorectal cancer || ||	TRUE	MedicineITLab	0.0541079	828	6.37428e-17	IL5RA	TRUE	reported	finn-pQTL-s-R10-seq_13686_2	2	TRUE	0.0834499	75.2055	143.937	72.9425
rs13256826	T	C	T	C	0.403704	0.0099	0.391304	0.47	FALSE	FALSE	FALSE	ukb-saige-153	8	134116227	0.021	387318	0.64	Colorectal cancer || id:ukb-saige-153	Colorectal cancer	Colorectal cancer || ||	TRUE	MedicineITLab	0.0491606	828	8.35174e-16	CCN4	TRUE	reported	finn-pQTL-s-R10-seq_13692_154	2	TRUE	0.0776374	69.5263	143.937	67.436
rs6846462	C	T	C	T	0.624797	0.063	0.270531	0.2	FALSE	FALSE	FALSE	ukb-saige-153	4	88447660	0.027	387318	0.018	Colorectal cancer || id:ukb-saige-153	Colorectal cancer	Colorectal cancer || ||	TRUE	MedicineITLab	0.050454	828	1.9876e-32	SPARCL1	TRUE	reported	finn-pQTL-s-R10-seq_13707_27	2	TRUE	0.154075	150.446	143.937	153.351
rs74705037	A	G	A	G	1.43095	-0.011	0.0150966	0.044	FALSE	FALSE	FALSE	ukb-saige-153	19	51504808	0.052	387318	0.83	Colorectal cancer || id:ukb-saige-153	Colorectal cancer	Colorectal cancer || ||	TRUE	MedicineITLab	0.196981	828	8.67383e-13	KLK8	TRUE	reported	finn-pQTL-s-R10-seq_13708_56	2	TRUE	0.0608908	53.5569	143.937	52.7716
[truncated: 927 more rows]

## Sheet: Iceland decode 4907 proteins
SNP	effect_allele.exposure	other_allele.exposure	effect_allele.outcome	other_allele.outcome	beta.exposure	beta.outcome	eaf.exposure	eaf.outcome	remove	palindromic	ambiguous	id.outcome	chr	pos	se.outcome	samplesize.outcome	pval.outcome	outcome	originalname.outcome	outcome.deprecated	mr_keep.outcome	data_source.outcome	chr.exposure	pos.exposure	pval.exposure	se.exposure	samplesize.exposure	exposure	id.exposure	action	mr_keep	R2	F	FMean	F_pow_beta_se
[truncated: 5,366 more rows]
