# Supplementary material for: Associations of plasma protein levels with risk of colorectal cancer: a proteome-wide Mendelian randomization study
Source: Research Square preprint supplement (doi:10.21203/rs.3.rs-6304313/v1), 2025-05-05
Supplement: Supplementary file 2 [file 478e422101068b6b4a7c45d3.xlsx]

## Sheet: FinnGen Olink
id.exposure	id.outcome	outcome	exposure	method	nsnp	b	se	pval	lo_ci	up_ci	or	or_lci95	or_uci95	p_fdr
finn-pQTL-R10-v1-TMEM132A	ukb-saige-153	Colorectal cancer || id:ukb-saige-153	TMEM132A	Wald ratio	1	-0.154866	0.0396169	9.26e-05	-0.232515	-0.077217	0.85653	0.792538	0.925689	0.0489161
finn-pQTL-R10-v1-DKKL1	ukb-saige-153	Colorectal cancer || id:ukb-saige-153	DKKL1	Inverse variance weighted	2	0.0738137	0.019853	0.000200794	0.0349019	0.112726	1.07661	1.03552	1.11932	0.0495961
finn-pQTL-R10-v1-MATN3	ukb-saige-153	Colorectal cancer || id:ukb-saige-153	MATN3	Weighted median	3	0.0966635	0.0334764	0.00388301	0.0310498	0.162277	1.10149	1.03154	1.17619	0.306758
finn-pQTL-R10-v1-DPEP1	ukb-saige-153	Colorectal cancer || id:ukb-saige-153	DPEP1	Weighted median	3	0.0653188	0.0257233	0.0111079	0.0149011	0.115736	1.0675	1.01501	1.1227	0.412239
finn-pQTL-R10-v1-FOLR3	ukb-saige-153	Colorectal cancer || id:ukb-saige-153	FOLR3	Weighted median	3	0.0594662	0.0267281	0.0260911	0.00707905	0.111853	1.06127	1.0071	1.11835	0.412239
finn-pQTL-R10-v1-PSCA	ukb-saige-153	Colorectal cancer || id:ukb-saige-153	PSCA	Weighted median	4	0.0420435	0.0175021	0.0162971	0.00773931	0.0763477	1.04294	1.00777	1.07934	0.412239
finn-pQTL-R10-v1-TNXB	ukb-saige-153	Colorectal cancer || id:ukb-saige-153	TNXB	Weighted median	3	0.133556	0.0597234	0.0253356	0.0164984	0.250614	1.14289	1.01664	1.28481	0.412239
finn-pQTL-R10-v1-GPC5	ukb-saige-153	Colorectal cancer || id:ukb-saige-153	GPC5	Weighted median	3	-0.0490895	0.0238019	0.0391679	-0.0957412	-0.00243775	0.952096	0.908699	0.997565	0.515711
finn-pQTL-R10-v1-GC	ukb-saige-153	Colorectal cancer || id:ukb-saige-153	GC	Weighted median	4	0.0355741	0.0179608	0.0476297	0.000371019	0.0707772	1.03621	1.00037	1.07334	0.537535
finn-pQTL-R10-v1-PGLYRP2	ukb-saige-153	Colorectal cancer || id:ukb-saige-153	PGLYRP2	Weighted median	4	-0.0399436	0.0209309	0.0563449	-0.0809681	0.0010809	0.960844	0.922223	1.00108	0.556405
finn-pQTL-R10-v1-AAMDC	ukb-saige-153	Colorectal cancer || id:ukb-saige-153	AAMDC	Inverse variance weighted	2	0.0810214	0.0314788	0.0100577	0.019323	0.14272	1.08439	1.01951	1.15341	0.586281
finn-pQTL-R10-v1-C2	ukb-saige-153	Colorectal cancer || id:ukb-saige-153	C2	Inverse variance weighted	2	0.14659	0.0673103	0.0294193	0.0146617	0.278518	1.15788	1.01477	1.32117	0.586281
finn-pQTL-R10-v1-DPEP1	ukb-saige-153	Colorectal cancer || id:ukb-saige-153	DPEP1	Inverse variance weighted	3	0.0651414	0.0237731	0.00614152	0.0185461	0.111737	1.06731	1.01872	1.11822	0.586281
finn-pQTL-R10-v1-FOLR3	ukb-saige-153	Colorectal cancer || id:ukb-saige-153	FOLR3	Inverse variance weighted	3	0.0584998	0.0257119	0.0228939	0.00810443	0.108895	1.06024	1.00814	1.11505	0.586281
finn-pQTL-R10-v1-GFRAL	ukb-saige-153	Colorectal cancer || id:ukb-saige-153	GFRAL	Inverse variance weighted	2	-0.110809	0.0519038	0.0327697	-0.21254	-0.00907763	0.89511	0.808528	0.990963	0.586281
finn-pQTL-R10-v1-GPC5	ukb-saige-153	Colorectal cancer || id:ukb-saige-153	GPC5	Inverse variance weighted	3	-0.0484981	0.0228814	0.0340449	-0.0933457	-0.0036505	0.952659	0.910879	0.996356	0.586281
finn-pQTL-R10-v1-LRIG1	ukb-saige-153	Colorectal cancer || id:ukb-saige-153	LRIG1	Inverse variance weighted	2	0.0528051	0.0242273	0.0292893	0.00531959	0.100291	1.05422	1.00533	1.10549	0.586281
finn-pQTL-R10-v1-LY9	ukb-saige-153	Colorectal cancer || id:ukb-saige-153	LY9	Inverse variance weighted	2	-0.105952	0.0441588	0.0164247	-0.192503	-0.0194007	0.899468	0.824892	0.980786	0.586281
finn-pQTL-R10-v1-MATN3	ukb-saige-153	Colorectal cancer || id:ukb-saige-153	MATN3	Inverse variance weighted	3	0.0953726	0.0358932	0.0078811	0.0250219	0.165723	1.10007	1.02534	1.18025	0.586281
finn-pQTL-R10-v1-NPL	ukb-saige-153	Colorectal cancer || id:ukb-saige-153	NPL	Inverse variance weighted	2	-0.141584	0.0621103	0.0226339	-0.26332	-0.0198478	0.867982	0.768496	0.980348	0.586281
finn-pQTL-R10-v1-PGLYRP2	ukb-saige-153	Colorectal cancer || id:ukb-saige-153	PGLYRP2	Inverse variance weighted	4	-0.0409231	0.019474	0.0356041	-0.0790921	-0.00275401	0.959903	0.923955	0.99725	0.586281
finn-pQTL-R10-v1-PKD1	ukb-saige-153	Colorectal cancer || id:ukb-saige-153	PKD1	Inverse variance weighted	2	-0.144738	0.0613743	0.01836	-0.265031	-0.024444	0.865249	0.767182	0.975852	0.586281
finn-pQTL-R10-v1-PSCA	ukb-saige-153	Colorectal cancer || id:ukb-saige-153	PSCA	Inverse variance weighted	4	0.0425049	0.0170841	0.0128473	0.00901997	0.0759898	1.04342	1.00906	1.07895	0.586281
finn-pQTL-R10-v1-TPK1	ukb-saige-153	Colorectal cancer || id:ukb-saige-153	TPK1	Inverse variance weighted	2	0.14845	0.0686274	0.0305309	0.0139405	0.28296	1.16004	1.01404	1.32705	0.586281
finn-pQTL-R10-v1-CTSS	ukb-saige-153	Colorectal cancer || id:ukb-saige-153	CTSS	Inverse variance weighted	2	0.0809175	0.0406301	0.0464187	0.00128251	0.160552	1.08428	1.00128	1.17416	0.61096
finn-pQTL-R10-v1-F11	ukb-saige-153	Colorectal cancer || id:ukb-saige-153	F11	Inverse variance weighted	2	0.0855864	0.0449474	0.056891	-0.00251042	0.173683	1.08936	0.997493	1.18968	0.61096
finn-pQTL-R10-v1-FCER2	ukb-saige-153	Colorectal cancer || id:ukb-saige-153	FCER2	Inverse variance weighted	2	-0.107635	0.0563202	0.0559874	-0.218023	0.00275218	0.897955	0.804107	1.00276	0.61096
finn-pQTL-R10-v1-FGFBP2	ukb-saige-153	Colorectal cancer || id:ukb-saige-153	FGFBP2	Inverse variance weighted	2	-0.0741504	0.0383062	0.0529009	-0.14923	0.000929715	0.928532	0.861371	1.00093	0.61096
finn-pQTL-R10-v1-GGT5	ukb-saige-153	Colorectal cancer || id:ukb-saige-153	GGT5	Inverse variance weighted	2	-0.120279	0.0617035	0.0512587	-0.241218	0.000659762	0.886673	0.78567	1.00066	0.61096
finn-pQTL-R10-v1-GSR	ukb-saige-153	Colorectal cancer || id:ukb-saige-153	GSR	Inverse variance weighted	2	-0.189033	0.0943322	0.0450799	-0.373924	-0.00414197	0.827759	0.688029	0.995867	0.61096
finn-pQTL-R10-v1-MGMT	ukb-saige-153	Colorectal cancer || id:ukb-saige-153	MGMT	Inverse variance weighted	2	0.10158	0.0517427	0.0496264	0.000164028	0.202996	1.10692	1.00016	1.22507	0.61096
finn-pQTL-R10-v1-MMP12	ukb-saige-153	Colorectal cancer || id:ukb-saige-153	MMP12	Inverse variance weighted	4	0.0640269	0.0324704	0.0486262	0.000384919	0.127669	1.06612	1.00038	1.13618	0.61096
finn-pQTL-R10-v1-PAEP	ukb-saige-153	Colorectal cancer || id:ukb-saige-153	PAEP	Inverse variance weighted	2	-0.0469619	0.0249487	0.0597905	-0.0958615	0.00193763	0.954124	0.90859	1.00194	0.615343
finn-pQTL-R10-v1-TNXB	ukb-saige-153	Colorectal cancer || id:ukb-saige-153	TNXB	Inverse variance weighted	3	0.110056	0.0599129	0.0662189	-0.00737295	0.227486	1.11634	0.992654	1.25544	0.654243
finn-pQTL-R10-v1-MMP12	ukb-saige-153	Colorectal cancer || id:ukb-saige-153	MMP12	Weighted median	4	0.0594478	0.0337967	0.0785805	-0.00679374	0.125689	1.06125	0.993229	1.13393	0.689762
finn-pQTL-R10-v1-IL5RA	ukb-saige-153	Colorectal cancer || id:ukb-saige-153	IL5RA	Weighted median	3	-0.0772362	0.0452497	0.0878427	-0.165926	0.0114532	0.925671	0.847109	1.01152	0.693958
finn-pQTL-R10-v1-HLA-DRA	ukb-saige-153	Colorectal cancer || id:ukb-saige-153	HLA-DRA	Wald ratio	1	0.182667	0.0608889	0.0026998	0.0633244	0.302009	1.20041	1.06537	1.35257	0.712746
finn-pQTL-R10-v1-DSCAM	ukb-saige-153	Colorectal cancer || id:ukb-saige-153	DSCAM	Wald ratio	1	-0.167891	0.0649177	0.00970387	-0.295129	-0.0406519	0.845446	0.744435	0.960163	0.715235
finn-pQTL-R10-v1-ENO1	ukb-saige-153	Colorectal cancer || id:ukb-saige-153	ENO1	Wald ratio	1	-0.209693	0.0852751	0.0139318	-0.376832	-0.0425537	0.810833	0.686031	0.958339	0.715235
finn-pQTL-R10-v1-GIMAP8	ukb-saige-153	Colorectal cancer || id:ukb-saige-153	GIMAP8	Wald ratio	1	-0.268201	0.105364	0.0109136	-0.474715	-0.0616861	0.764754	0.622062	0.940178	0.715235
finn-pQTL-R10-v1-ICAM3	ukb-saige-153	Colorectal cancer || id:ukb-saige-153	ICAM3	Wald ratio	1	-0.162163	0.0621625	0.0090888	-0.284002	-0.0403245	0.850303	0.752765	0.960478	0.715235
finn-pQTL-R10-v1-LAMB1	ukb-saige-153	Colorectal cancer || id:ukb-saige-153	LAMB1	Wald ratio	1	0.472418	0.178753	0.00822097	0.122063	0.822774	1.60387	1.12982	2.27681	0.715235
finn-pQTL-R10-v1-MFAP4	ukb-saige-153	Colorectal cancer || id:ukb-saige-153	MFAP4	Wald ratio	1	-0.254814	0.0979022	0.00924821	-0.446702	-0.0629256	0.775061	0.639734	0.939013	0.715235
finn-pQTL-R10-v1-QDPR	ukb-saige-153	Colorectal cancer || id:ukb-saige-153	QDPR	Wald ratio	1	-0.185943	0.0762063	0.0146873	-0.335308	-0.036579	0.830321	0.715118	0.964082	0.715235
finn-pQTL-R10-v1-TMEM25	ukb-saige-153	Colorectal cancer || id:ukb-saige-153	TMEM25	Wald ratio	1	0.132534	0.0467767	0.00460653	0.0408516	0.224216	1.14172	1.0417	1.25134	0.715235
finn-pQTL-R10-v1-TNFRSF6B	ukb-saige-153	Colorectal cancer || id:ukb-saige-153	TNFRSF6B	Wald ratio	1	0.128961	0.0529661	0.0149007	0.0251474	0.232775	1.13765	1.02547	1.2621	0.715235
finn-pQTL-R10-v1-TNFSF10	ukb-saige-153	Colorectal cancer || id:ukb-saige-153	TNFSF10	Wald ratio	1	-2.85928	1.2097	0.0180966	-5.23028	-0.488277	0.05731	0.00535202	0.613683	0.734999
finn-pQTL-R10-v1-VIT	ukb-saige-153	Colorectal cancer || id:ukb-saige-153	VIT	Wald ratio	1	-0.0922393	0.0390243	0.0180966	-0.168727	-0.0157516	0.911887	0.84474	0.984372	0.734999
finn-pQTL-R10-v1-INHBC	ukb-saige-153	Colorectal cancer || id:ukb-saige-153	INHBC	Wald ratio	1	-0.0884192	0.0381117	0.0203409	-0.163118	-0.0137202	0.915377	0.849491	0.986373	0.767142
finn-pQTL-R10-v1-MELTF	ukb-saige-153	Colorectal cancer || id:ukb-saige-153	MELTF	Weighted median	4	-0.0964132	0.0603647	0.110226	-0.214728	0.0219016	0.908089	0.806761	1.02214	0.791622
finn-pQTL-R10-v1-ALPP	ukb-saige-153	Colorectal cancer || id:ukb-saige-153	ALPP	Inverse variance weighted	2	-0.0972938	0.0596124	0.102657	-0.214134	0.0195464	0.907289	0.80724	1.01974	0.792381
finn-pQTL-R10-v1-GC	ukb-saige-153	Colorectal cancer || id:ukb-saige-153	GC	Inverse variance weighted	4	0.0303966	0.0176529	0.0850861	-0.004203	0.0649963	1.03086	0.995806	1.06716	0.792381
finn-pQTL-R10-v1-HAVCR1	ukb-saige-153	Colorectal cancer || id:ukb-saige-153	HAVCR1	Inverse variance weighted	2	0.0548216	0.032135	0.0880119	-0.00816295	0.117806	1.05635	0.99187	1.12503	0.792381
finn-pQTL-R10-v1-LEFTY2	ukb-saige-153	Colorectal cancer || id:ukb-saige-153	LEFTY2	Inverse variance weighted	2	0.044041	0.0262827	0.0938044	-0.00747317	0.0955551	1.04503	0.992555	1.10027	0.792381
finn-pQTL-R10-v1-LILRA2	ukb-saige-153	Colorectal cancer || id:ukb-saige-153	LILRA2	Inverse variance weighted	2	0.0548963	0.0335388	0.101672	-0.0108398	0.120632	1.05643	0.989219	1.12821	0.792381
finn-pQTL-R10-v1-MILR1	ukb-saige-153	Colorectal cancer || id:ukb-saige-153	MILR1	Inverse variance weighted	3	0.0880574	0.053316	0.0986136	-0.016442	0.192557	1.09205	0.983692	1.21235	0.792381
finn-pQTL-R10-v1-PLXNB2	ukb-saige-153	Colorectal cancer || id:ukb-saige-153	PLXNB2	Inverse variance weighted	2	0.0424325	0.0251239	0.0912322	-0.00681024	0.0916753	1.04335	0.993213	1.09601	0.792381
finn-pQTL-R10-v1-APOE	ukb-saige-153	Colorectal cancer || id:ukb-saige-153	APOE	Wald ratio	1	-0.0651335	0.0290595	0.0250015	-0.12209	-0.00817675	0.936942	0.885069	0.991857	0.798101
finn-pQTL-R10-v1-DPEP2	ukb-saige-153	Colorectal cancer || id:ukb-saige-153	DPEP2	Wald ratio	1	0.249722	0.111718	0.025398	0.0307552	0.468688	1.28367	1.03123	1.5979	0.798101
finn-pQTL-R10-v1-PI3	ukb-saige-153	Colorectal cancer || id:ukb-saige-153	PI3	Wald ratio	1	0.162195	0.072708	0.0256964	0.0196871	0.304702	1.17609	1.01988	1.35622	0.798101
finn-pQTL-R10-v1-C1QTNF5	ukb-saige-153	Colorectal cancer || id:ukb-saige-153	C1QTNF5	Wald ratio	1	0.246955	0.119494	0.0387656	0.0127461	0.481164	1.28012	1.01283	1.61796	0.805388
finn-pQTL-R10-v1-CAMKK1	ukb-saige-153	Colorectal cancer || id:ukb-saige-153	CAMKK1	Wald ratio	1	-0.170764	0.0836397	0.0411846	-0.334698	-0.00683058	0.84302	0.715554	0.993193	0.805388
finn-pQTL-R10-v1-DSG3	ukb-saige-153	Colorectal cancer || id:ukb-saige-153	DSG3	Wald ratio	1	-0.151388	0.0718452	0.0351052	-0.292205	-0.0105715	0.859514	0.746616	0.989484	0.805388
finn-pQTL-R10-v1-KHK	ukb-saige-153	Colorectal cancer || id:ukb-saige-153	KHK	Wald ratio	1	0.140196	0.0685401	0.0408101	0.00585706	0.274534	1.1505	1.00587	1.31592	0.805388
finn-pQTL-R10-v1-LMOD1	ukb-saige-153	Colorectal cancer || id:ukb-saige-153	LMOD1	Wald ratio	1	-0.184573	0.0902357	0.0408101	-0.361435	-0.00771105	0.831459	0.696676	0.992319	0.805388
finn-pQTL-R10-v1-PKLR	ukb-saige-153	Colorectal cancer || id:ukb-saige-153	PKLR	Wald ratio	1	0.21336	0.101939	0.0363471	0.0135602	0.41316	1.23783	1.01365	1.51159	0.805388
finn-pQTL-R10-v1-RNASE6	ukb-saige-153	Colorectal cancer || id:ukb-saige-153	RNASE6	Wald ratio	1	-0.145639	0.0667512	0.029123	-0.276471	-0.0148066	0.86447	0.758455	0.985302	0.805388
finn-pQTL-R10-v1-STAB2	ukb-saige-153	Colorectal cancer || id:ukb-saige-153	STAB2	Wald ratio	1	0.120649	0.0582912	0.0384741	0.00639847	0.2349	1.12823	1.00642	1.26478	0.805388
finn-pQTL-R10-v1-TNFRSF11A	ukb-saige-153	Colorectal cancer || id:ukb-saige-153	TNFRSF11A	Wald ratio	1	0.113301	0.0519297	0.029123	0.0115189	0.215083	1.11997	1.01159	1.23997	0.805388
finn-pQTL-R10-v1-VWC2	ukb-saige-153	Colorectal cancer || id:ukb-saige-153	VWC2	Wald ratio	1	0.116459	0.0543474	0.0321246	0.00993781	0.22298	1.12351	1.00999	1.2498	0.805388
finn-pQTL-R10-v1-AFAP1	ukb-saige-153	Colorectal cancer || id:ukb-saige-153	AFAP1	Inverse variance weighted	2	-0.0353412	0.0229688	0.123886	-0.08036	0.00967758	0.965276	0.922784	1.00972	0.83233
finn-pQTL-R10-v1-B3GNT7	ukb-saige-153	Colorectal cancer || id:ukb-saige-153	B3GNT7	Inverse variance weighted	2	-0.042025	0.0269787	0.119302	-0.0949033	0.0108533	0.958846	0.909461	1.01091	0.83233
finn-pQTL-R10-v1-CYB5R2	ukb-saige-153	Colorectal cancer || id:ukb-saige-153	CYB5R2	Inverse variance weighted	2	-0.137645	0.0889137	0.121604	-0.311916	0.0366257	0.871408	0.732043	1.0373	0.83233
finn-pQTL-R10-v1-DKK3	ukb-saige-153	Colorectal cancer || id:ukb-saige-153	DKK3	Inverse variance weighted	2	-0.0794575	0.0505078	0.115678	-0.178453	0.0195377	0.923617	0.836564	1.01973	0.83233
finn-pQTL-R10-v1-PPCDC	ukb-saige-153	Colorectal cancer || id:ukb-saige-153	PPCDC	Inverse variance weighted	2	0.0666146	0.0433853	0.124681	-0.0184206	0.15165	1.06888	0.981748	1.16375	0.83233
finn-pQTL-R10-v1-ANGPTL1	ukb-saige-153	Colorectal cancer || id:ukb-saige-153	ANGPTL1	Inverse variance weighted	2	0.0739982	0.0515292	0.150989	-0.0269989	0.174995	1.0768	0.973362	1.19124	0.867424
finn-pQTL-R10-v1-AOC3	ukb-saige-153	Colorectal cancer || id:ukb-saige-153	AOC3	Inverse variance weighted	2	0.0476531	0.0334703	0.154521	-0.0179487	0.113255	1.04881	0.982211	1.11992	0.867424
finn-pQTL-R10-v1-CA6	ukb-saige-153	Colorectal cancer || id:ukb-saige-153	CA6	Inverse variance weighted	2	-0.038689	0.0270345	0.152403	-0.0916767	0.0142987	0.96205	0.9124	1.0144	0.867424
finn-pQTL-R10-v1-DNER	ukb-saige-153	Colorectal cancer || id:ukb-saige-153	DNER	Inverse variance weighted	2	-0.0905803	0.063561	0.154131	-0.21516	0.0339993	0.913401	0.806413	1.03458	0.867424
finn-pQTL-R10-v1-FCRL6	ukb-saige-153	Colorectal cancer || id:ukb-saige-153	FCRL6	Inverse variance weighted	2	0.0419088	0.0282675	0.138187	-0.0134956	0.0973132	1.0428	0.986595	1.10221	0.867424
finn-pQTL-R10-v1-LGALS3	ukb-saige-153	Colorectal cancer || id:ukb-saige-153	LGALS3	Inverse variance weighted	2	0.0488417	0.0341147	0.152232	-0.0180231	0.115707	1.05005	0.982138	1.12267	0.867424
finn-pQTL-R10-v1-QSOX1	ukb-saige-153	Colorectal cancer || id:ukb-saige-153	QSOX1	Inverse variance weighted	2	-0.0455157	0.0316991	0.15104	-0.107646	0.0166145	0.955505	0.897945	1.01675	0.867424
finn-pQTL-R10-v1-NPTXR	ukb-saige-153	Colorectal cancer || id:ukb-saige-153	NPTXR	Inverse variance weighted	2	0.05458	0.0388245	0.15978	-0.0215161	0.130676	1.0561	0.978714	1.1396	0.877013
finn-pQTL-R10-v1-BST1	ukb-saige-153	Colorectal cancer || id:ukb-saige-153	BST1	Inverse variance weighted	4	0.0301856	0.0218604	0.167329	-0.0126607	0.0730319	1.03065	0.987419	1.07576	0.879368
finn-pQTL-R10-v1-LCAT	ukb-saige-153	Colorectal cancer || id:ukb-saige-153	LCAT	Inverse variance weighted	2	0.0681072	0.0490123	0.164652	-0.0279568	0.164171	1.07048	0.97243	1.17842	0.879368
finn-pQTL-R10-v1-ACAA1	ukb-saige-153	Colorectal cancer || id:ukb-saige-153	ACAA1	Wald ratio	1	0.13273	0.124434	0.286122	-0.111161	0.376621	1.14194	0.894794	1.45735	0.892699
finn-pQTL-R10-v1-ACE	ukb-saige-153	Colorectal cancer || id:ukb-saige-153	ACE	Wald ratio	1	-0.046974	0.0298926	0.116083	-0.105563	0.0116154	0.954112	0.899817	1.01168	0.892699
finn-pQTL-R10-v1-ACP5	ukb-saige-153	Colorectal cancer || id:ukb-saige-153	ACP5	Wald ratio	1	-0.119418	0.0635612	0.0602735	-0.243998	0.00516194	0.887437	0.783489	1.00518	0.892699
finn-pQTL-R10-v1-ACY1	ukb-saige-153	Colorectal cancer || id:ukb-saige-153	ACY1	Wald ratio	1	-0.0719937	0.056875	0.205577	-0.183469	0.0394814	0.930537	0.832378	1.04027	0.892699
finn-pQTL-R10-v1-ACY3	ukb-saige-153	Colorectal cancer || id:ukb-saige-153	ACY3	Wald ratio	1	-0.0893433	0.0794163	0.260589	-0.244999	0.0663126	0.914532	0.782705	1.06856	0.892699
finn-pQTL-R10-v1-ADAM22	ukb-saige-153	Colorectal cancer || id:ukb-saige-153	ADAM22	Wald ratio	1	0.308288	0.234773	0.189139	-0.151867	0.768443	1.36109	0.859102	2.15641	0.892699
finn-pQTL-R10-v1-ADAMTS4	ukb-saige-153	Colorectal cancer || id:ukb-saige-153	ADAMTS4	Wald ratio	1	-0.140863	0.110678	0.203115	-0.357793	0.0760663	0.868608	0.699218	1.07903	0.892699
finn-pQTL-R10-v1-ADGRE2	ukb-saige-153	Colorectal cancer || id:ukb-saige-153	ADGRE2	Wald ratio	1	0.137299	0.128345	0.284724	-0.114257	0.388855	1.14717	0.892029	1.47529	0.892699
finn-pQTL-R10-v1-AFP	ukb-saige-153	Colorectal cancer || id:ukb-saige-153	AFP	Wald ratio	1	0.162129	0.109546	0.138873	-0.0525822	0.376839	1.17601	0.948776	1.45767	0.892699
finn-pQTL-R10-v1-AGRN	ukb-saige-153	Colorectal cancer || id:ukb-saige-153	AGRN	Wald ratio	1	0.101472	0.0544484	0.0623728	-0.00524685	0.208191	1.1068	0.994767	1.23145	0.892699
finn-pQTL-R10-v1-AHCY	ukb-saige-153	Colorectal cancer || id:ukb-saige-153	AHCY	Wald ratio	1	0.112152	0.0741929	0.130629	-0.033266	0.25757	1.11868	0.967281	1.29378	0.892699
finn-pQTL-R10-v1-AHNAK2	ukb-saige-153	Colorectal cancer || id:ukb-saige-153	AHNAK2	Wald ratio	1	-0.125124	0.0860225	0.145795	-0.293728	0.0434805	0.882388	0.745479	1.04444	0.892699
finn-pQTL-R10-v1-ALCAM	ukb-saige-153	Colorectal cancer || id:ukb-saige-153	ALCAM	Wald ratio	1	-0.109544	0.1031	0.288009	-0.311621	0.0925326	0.896243	0.732259	1.09695	0.892699
finn-pQTL-R10-v1-AMY2A	ukb-saige-153	Colorectal cancer || id:ukb-saige-153	AMY2A	Wald ratio	1	0.0692282	0.0593384	0.243345	-0.0470752	0.185532	1.07168	0.954016	1.20386	0.892699
finn-pQTL-R10-v1-ARSB	ukb-saige-153	Colorectal cancer || id:ukb-saige-153	ARSB	Wald ratio	1	-0.0808099	0.0771367	0.294814	-0.231998	0.070378	0.922369	0.792948	1.07291	0.892699
finn-pQTL-R10-v1-ART3	ukb-saige-153	Colorectal cancer || id:ukb-saige-153	ART3	Wald ratio	1	-0.0676008	0.0621928	0.277056	-0.189499	0.054297	0.934633	0.827374	1.0558	0.892699
finn-pQTL-R10-v1-ASAH1	ukb-saige-153	Colorectal cancer || id:ukb-saige-153	ASAH1	Wald ratio	1	-0.0514261	0.0443055	0.245758	-0.138265	0.0354128	0.949874	0.870868	1.03605	0.892699
finn-pQTL-R10-v1-ASRGL1	ukb-saige-153	Colorectal cancer || id:ukb-saige-153	ASRGL1	Wald ratio	1	0.0973489	0.0681442	0.153127	-0.0362138	0.230912	1.10224	0.964434	1.25975	0.892699
finn-pQTL-R10-v1-BCAM	ukb-saige-153	Colorectal cancer || id:ukb-saige-153	BCAM	Wald ratio	1	0.160447	0.105827	0.129487	-0.0469734	0.367867	1.17404	0.954113	1.44465	0.892699
finn-pQTL-R10-v1-BCAN	ukb-saige-153	Colorectal cancer || id:ukb-saige-153	BCAN	Wald ratio	1	-0.0950055	0.0910469	0.296727	-0.273457	0.0834465	0.909368	0.760745	1.08703	0.892699
finn-pQTL-R10-v1-BCAT1	ukb-saige-153	Colorectal cancer || id:ukb-saige-153	BCAT1	Wald ratio	1	0.0695194	0.0521396	0.182422	-0.0326741	0.171713	1.07199	0.967854	1.18734	0.892699
finn-pQTL-R10-v1-BMP10	ukb-saige-153	Colorectal cancer || id:ukb-saige-153	BMP10	Wald ratio	1	0.054464	0.0435712	0.2113	-0.0309356	0.139864	1.05597	0.969538	1.15012	0.892699
finn-pQTL-R10-v1-BRSK2	ukb-saige-153	Colorectal cancer || id:ukb-saige-153	BRSK2	Wald ratio	1	-0.133268	0.106615	0.2113	-0.342233	0.0756963	0.87523	0.710183	1.07863	0.892699
finn-pQTL-R10-v1-BTC	ukb-saige-153	Colorectal cancer || id:ukb-saige-153	BTC	Wald ratio	1	-0.147018	0.0855377	0.0856599	-0.314672	0.020636	0.863278	0.730028	1.02085	0.892699
finn-pQTL-R10-v1-C5	ukb-saige-153	Colorectal cancer || id:ukb-saige-153	C5	Wald ratio	1	-0.154042	0.0996742	0.122236	-0.349404	0.0413195	0.857236	0.705109	1.04219	0.892699
finn-pQTL-R10-v1-CANT1	ukb-saige-153	Colorectal cancer || id:ukb-saige-153	CANT1	Wald ratio	1	-0.158985	0.114469	0.164867	-0.383345	0.0653748	0.853009	0.681577	1.06756	0.892699
finn-pQTL-R10-v1-DBI	ukb-saige-153	Colorectal cancer || id:ukb-saige-153	DBI	Wald ratio	1	-0.133032	0.082353	0.106227	-0.294444	0.0283801	0.875437	0.744946	1.02879	0.892699
finn-pQTL-R10-v1-DCBLD2	ukb-saige-153	Colorectal cancer || id:ukb-saige-153	DCBLD2	Wald ratio	1	-0.090282	0.0691221	0.191511	-0.225761	0.0451974	0.913674	0.797908	1.04623	0.892699
finn-pQTL-R10-v1-DNPH1	ukb-saige-153	Colorectal cancer || id:ukb-saige-153	DNPH1	Wald ratio	1	0.0915103	0.0516591	0.0764895	-0.00974142	0.192762	1.09583	0.990306	1.21259	0.892699
finn-pQTL-R10-v1-DRAXIN	ukb-saige-153	Colorectal cancer || id:ukb-saige-153	DRAXIN	Wald ratio	1	0.0903788	0.0739463	0.221624	-0.0545559	0.235313	1.09459	0.946906	1.26531	0.892699
finn-pQTL-R10-v1-DXO	ukb-saige-153	Colorectal cancer || id:ukb-saige-153	DXO	Wald ratio	1	0.0824531	0.0586333	0.15965	-0.0324682	0.197374	1.08595	0.968053	1.2182	0.892699
finn-pQTL-R10-v1-EDDM3B	ukb-saige-153	Colorectal cancer || id:ukb-saige-153	EDDM3B	Wald ratio	1	0.0925849	0.0575528	0.107683	-0.0202186	0.205388	1.09701	0.979984	1.228	0.892699
finn-pQTL-R10-v1-EFHD1	ukb-saige-153	Colorectal cancer || id:ukb-saige-153	EFHD1	Wald ratio	1	-0.121304	0.0829974	0.143868	-0.283979	0.041371	0.885765	0.752782	1.04224	0.892699
finn-pQTL-R10-v1-EHD3	ukb-saige-153	Colorectal cancer || id:ukb-saige-153	EHD3	Wald ratio	1	0.112728	0.108219	0.297566	-0.0993809	0.324837	1.11933	0.905398	1.3838	0.892699
finn-pQTL-R10-v1-ENG	ukb-saige-153	Colorectal cancer || id:ukb-saige-153	ENG	Wald ratio	1	0.134804	0.074142	0.0690363	-0.0105147	0.280122	1.14431	0.98954	1.32329	0.892699
finn-pQTL-R10-v1-ENTR1	ukb-saige-153	Colorectal cancer || id:ukb-saige-153	ENTR1	Wald ratio	1	0.0891952	0.076807	0.245524	-0.0613465	0.239737	1.09329	0.940497	1.27091	0.892699
finn-pQTL-R10-v1-EPHB6	ukb-saige-153	Colorectal cancer || id:ukb-saige-153	EPHB6	Wald ratio	1	0.0774778	0.0743787	0.297566	-0.0683044	0.22326	1.08056	0.933976	1.25015	0.892699
finn-pQTL-R10-v1-ERBB4	ukb-saige-153	Colorectal cancer || id:ukb-saige-153	ERBB4	Wald ratio	1	0.11254	0.103884	0.27866	-0.0910712	0.316152	1.11912	0.912953	1.37184	0.892699
finn-pQTL-R10-v1-ESAM	ukb-saige-153	Colorectal cancer || id:ukb-saige-153	ESAM	Wald ratio	1	-0.126968	0.113833	0.264686	-0.350081	0.0961454	0.880762	0.704631	1.10092	0.892699
finn-pQTL-R10-v1-FABP1	ukb-saige-153	Colorectal cancer || id:ukb-saige-153	FABP1	Wald ratio	1	0.094723	0.0680822	0.164133	-0.038718	0.228164	1.09935	0.962022	1.25629	0.892699
finn-pQTL-R10-v1-FAS	ukb-saige-153	Colorectal cancer || id:ukb-saige-153	FAS	Wald ratio	1	0.0807311	0.0598972	0.177714	-0.0366675	0.19813	1.08408	0.963997	1.21912	0.892699
finn-pQTL-R10-v1-FCN1	ukb-saige-153	Colorectal cancer || id:ukb-saige-153	FCN1	Wald ratio	1	0.0924081	0.0540926	0.0875745	-0.0136133	0.19843	1.09681	0.986479	1.21949	0.892699
finn-pQTL-R10-v1-FCRL1	ukb-saige-153	Colorectal cancer || id:ukb-saige-153	FCRL1	Wald ratio	1	-0.0709744	0.0513953	0.167294	-0.171709	0.0297603	0.931486	0.842224	1.03021	0.892699
finn-pQTL-R10-v1-FKBP5	ukb-saige-153	Colorectal cancer || id:ukb-saige-153	FKBP5	Wald ratio	1	-0.114908	0.10214	0.260589	-0.315103	0.0852871	0.891448	0.729714	1.08903	0.892699
finn-pQTL-R10-v1-FLT1	ukb-saige-153	Colorectal cancer || id:ukb-saige-153	FLT1	Wald ratio	1	-0.0764852	0.060715	0.207763	-0.195487	0.0425163	0.926367	0.822434	1.04343	0.892699
finn-pQTL-R10-v1-FLT4	ukb-saige-153	Colorectal cancer || id:ukb-saige-153	FLT4	Wald ratio	1	0.155737	0.0825879	0.0593335	-0.0061351	0.317609	1.16852	0.993884	1.37384	0.892699
finn-pQTL-R10-v1-FXYD5	ukb-saige-153	Colorectal cancer || id:ukb-saige-153	FXYD5	Wald ratio	1	-0.0892017	0.0830498	0.282789	-0.251979	0.073576	0.914661	0.777261	1.07635	0.892699
finn-pQTL-R10-v1-GALNT3	ukb-saige-153	Colorectal cancer || id:ukb-saige-153	GALNT3	Wald ratio	1	0.063346	0.0582783	0.277056	-0.0508795	0.177571	1.0654	0.950393	1.19431	0.892699
finn-pQTL-R10-v1-GDNF	ukb-saige-153	Colorectal cancer || id:ukb-saige-153	GDNF	Wald ratio	1	0.0946603	0.0778318	0.223903	-0.05789	0.247211	1.09929	0.943754	1.28045	0.892699
finn-pQTL-R10-v1-GGACT	ukb-saige-153	Colorectal cancer || id:ukb-saige-153	GGACT	Wald ratio	1	0.133442	0.109894	0.224639	-0.0819492	0.348834	1.14276	0.921319	1.41741	0.892699
finn-pQTL-R10-v1-GGT1	ukb-saige-153	Colorectal cancer || id:ukb-saige-153	GGT1	Wald ratio	1	-0.0867316	0.0657964	0.187443	-0.215692	0.0422293	0.916923	0.805983	1.04313	0.892699
finn-pQTL-R10-v1-GHR	ukb-saige-153	Colorectal cancer || id:ukb-saige-153	GHR	Wald ratio	1	0.0515079	0.0386309	0.182422	-0.0242087	0.127224	1.05286	0.976082	1.13567	0.892699
finn-pQTL-R10-v1-GP2	ukb-saige-153	Colorectal cancer || id:ukb-saige-153	GP2	Wald ratio	1	0.10148	0.0761098	0.182422	-0.0476955	0.250655	1.10681	0.953424	1.28487	0.892699
finn-pQTL-R10-v1-GP6	ukb-saige-153	Colorectal cancer || id:ukb-saige-153	GP6	Wald ratio	1	-0.0528784	0.0451021	0.241031	-0.141279	0.0355218	0.948495	0.868247	1.03616	0.892699
finn-pQTL-R10-v1-GPIHBP1	ukb-saige-153	Colorectal cancer || id:ukb-saige-153	GPIHBP1	Wald ratio	1	-0.0643765	0.0544724	0.237278	-0.171142	0.0423895	0.937652	0.842701	1.0433	0.892699
finn-pQTL-R10-v1-GRN	ukb-saige-153	Colorectal cancer || id:ukb-saige-153	GRN	Wald ratio	1	-0.0935629	0.083167	0.260589	-0.25657	0.0694444	0.910681	0.773701	1.07191	0.892699
finn-pQTL-R10-v1-GRP	ukb-saige-153	Colorectal cancer || id:ukb-saige-153	GRP	Wald ratio	1	0.0751326	0.0640837	0.241031	-0.0504715	0.200737	1.07803	0.950781	1.2223	0.892699
finn-pQTL-R10-v1-GUCA2A	ukb-saige-153	Colorectal cancer || id:ukb-saige-153	GUCA2A	Wald ratio	1	0.167433	0.14473	0.247328	-0.116238	0.451104	1.18227	0.890263	1.57004	0.892699
finn-pQTL-R10-v1-GZMB	ukb-saige-153	Colorectal cancer || id:ukb-saige-153	GZMB	Wald ratio	1	0.0667452	0.0598405	0.264686	-0.0505422	0.184033	1.06902	0.950714	1.20206	0.892699
finn-pQTL-R10-v1-HLA-A	ukb-saige-153	Colorectal cancer || id:ukb-saige-153	HLA-A	Wald ratio	1	0.0365645	0.0335174	0.275313	-0.0291297	0.102259	1.03724	0.97129	1.10767	0.892699
finn-pQTL-R10-v1-HLA-E	ukb-saige-153	Colorectal cancer || id:ukb-saige-153	HLA-E	Wald ratio	1	0.0896034	0.0858699	0.296727	-0.0787016	0.257908	1.09374	0.924316	1.29422	0.892699
finn-pQTL-R10-v1-HPCAL1	ukb-saige-153	Colorectal cancer || id:ukb-saige-153	HPCAL1	Wald ratio	1	0.125449	0.0997157	0.208368	-0.069994	0.320891	1.13366	0.932399	1.37836	0.892699
finn-pQTL-R10-v1-HPSE	ukb-saige-153	Colorectal cancer || id:ukb-saige-153	HPSE	Wald ratio	1	-0.234081	0.214574	0.275313	-0.654647	0.186485	0.791298	0.519626	1.20501	0.892699
finn-pQTL-R10-v1-IFI30	ukb-saige-153	Colorectal cancer || id:ukb-saige-153	IFI30	Wald ratio	1	0.0669104	0.0446069	0.133614	-0.0205192	0.15434	1.0692	0.97969	1.16689	0.892699
finn-pQTL-R10-v1-IGF2R	ukb-saige-153	Colorectal cancer || id:ukb-saige-153	IGF2R	Wald ratio	1	0.0990432	0.0688996	0.150576	-0.036	0.234086	1.10411	0.96464	1.26375	0.892699
finn-pQTL-R10-v1-IL10RB	ukb-saige-153	Colorectal cancer || id:ukb-saige-153	IL10RB	Wald ratio	1	0.0499966	0.0362045	0.167294	-0.0209641	0.120957	1.05127	0.979254	1.12858	0.892699
finn-pQTL-R10-v1-IL18	ukb-saige-153	Colorectal cancer || id:ukb-saige-153	IL18	Wald ratio	1	-0.162029	0.108019	0.133614	-0.373746	0.0496888	0.850417	0.688152	1.05094	0.892699
finn-pQTL-R10-v1-IL1RN	ukb-saige-153	Colorectal cancer || id:ukb-saige-153	IL1RN	Wald ratio	1	-0.094659	0.0800961	0.237278	-0.251647	0.0623293	0.909683	0.777519	1.06431	0.892699
finn-pQTL-R10-v1-INHBB	ukb-saige-153	Colorectal cancer || id:ukb-saige-153	INHBB	Wald ratio	1	-0.0616593	0.0542602	0.255804	-0.168009	0.0446906	0.940203	0.845346	1.0457	0.892699
finn-pQTL-R10-v1-INPP5D	ukb-saige-153	Colorectal cancer || id:ukb-saige-153	INPP5D	Wald ratio	1	0.148143	0.101171	0.143116	-0.0501519	0.346439	1.15968	0.951085	1.41402	0.892699
finn-pQTL-R10-v1-INSL4	ukb-saige-153	Colorectal cancer || id:ukb-saige-153	INSL4	Wald ratio	1	-0.126197	0.0893893	0.158019	-0.3014	0.0490064	0.881442	0.739782	1.05023	0.892699
finn-pQTL-R10-v1-ITGAM	ukb-saige-153	Colorectal cancer || id:ukb-saige-153	ITGAM	Wald ratio	1	-0.155844	0.119481	0.192115	-0.390026	0.0783377	0.855693	0.677039	1.08149	0.892699
finn-pQTL-R10-v1-KIR2DL3	ukb-saige-153	Colorectal cancer || id:ukb-saige-153	KIR2DL3	Wald ratio	1	0.276103	0.230086	0.230139	-0.174865	0.727072	1.31798	0.83957	2.06901	0.892699
finn-pQTL-R10-v1-KLK7	ukb-saige-153	Colorectal cancer || id:ukb-saige-153	KLK7	Wald ratio	1	0.0576662	0.0520402	0.267815	-0.0443326	0.159665	1.05936	0.956636	1.17312	0.892699
finn-pQTL-R10-v1-LACTB2	ukb-saige-153	Colorectal cancer || id:ukb-saige-153	LACTB2	Wald ratio	1	0.17163	0.111055	0.122236	-0.0460374	0.389298	1.18724	0.955006	1.47594	0.892699
finn-pQTL-R10-v1-LAG3	ukb-saige-153	Colorectal cancer || id:ukb-saige-153	LAG3	Wald ratio	1	-0.113942	0.100269	0.255804	-0.310469	0.0825851	0.89231	0.733103	1.08609	0.892699
finn-pQTL-R10-v1-LAMP3	ukb-saige-153	Colorectal cancer || id:ukb-saige-153	LAMP3	Wald ratio	1	-0.104176	0.0763955	0.172682	-0.253911	0.0455595	0.901067	0.775761	1.04661	0.892699
finn-pQTL-R10-v1-LCN15	ukb-saige-153	Colorectal cancer || id:ukb-saige-153	LCN15	Wald ratio	1	-0.0519497	0.0385912	0.178253	-0.127589	0.0236891	0.949377	0.880215	1.02397	0.892699
finn-pQTL-R10-v1-LEPR	ukb-saige-153	Colorectal cancer || id:ukb-saige-153	LEPR	Wald ratio	1	-0.162655	0.0948818	0.0864763	-0.348623	0.0233138	0.849885	0.705659	1.02359	0.892699
finn-pQTL-R10-v1-LIPF	ukb-saige-153	Colorectal cancer || id:ukb-saige-153	LIPF	Wald ratio	1	0.129393	0.075742	0.0875745	-0.0190617	0.277847	1.13814	0.981119	1.32028	0.892699
finn-pQTL-R10-v1-LRRC38	ukb-saige-153	Colorectal cancer || id:ukb-saige-153	LRRC38	Wald ratio	1	0.1079	0.0620423	0.0820118	-0.0137032	0.229502	1.11394	0.98639	1.25797	0.892699
finn-pQTL-R10-v1-LYPD3	ukb-saige-153	Colorectal cancer || id:ukb-saige-153	LYPD3	Wald ratio	1	-0.0926279	0.0729796	0.204359	-0.235668	0.0504121	0.911533	0.790043	1.0517	0.892699
finn-pQTL-R10-v1-LYZL2	ukb-saige-153	Colorectal cancer || id:ukb-saige-153	LYZL2	Wald ratio	1	-0.166927	0.0966418	0.0841187	-0.356345	0.0224912	0.846262	0.700231	1.02275	0.892699
finn-pQTL-R10-v1-MET	ukb-saige-153	Colorectal cancer || id:ukb-saige-153	MET	Wald ratio	1	0.166202	0.107543	0.122236	-0.0445813	0.376986	1.18081	0.956398	1.45788	0.892699
finn-pQTL-R10-v1-MFGE8	ukb-saige-153	Colorectal cancer || id:ukb-saige-153	MFGE8	Wald ratio	1	0.0700739	0.0646836	0.27866	-0.0567059	0.196854	1.07259	0.944872	1.21757	0.892699
finn-pQTL-R10-v1-MLN	ukb-saige-153	Colorectal cancer || id:ukb-saige-153	MLN	Wald ratio	1	0.0890191	0.0816009	0.275313	-0.0709186	0.248957	1.0931	0.931538	1.28269	0.892699
finn-pQTL-R10-v1-MMP13	ukb-saige-153	Colorectal cancer || id:ukb-saige-153	MMP13	Wald ratio	1	-0.124944	0.0709141	0.0780854	-0.263935	0.0140477	0.882546	0.768023	1.01415	0.892699
finn-pQTL-R10-v1-MSRA	ukb-saige-153	Colorectal cancer || id:ukb-saige-153	MSRA	Wald ratio	1	-0.22401	0.113728	0.0488731	-0.446917	-0.00110282	0.799307	0.639597	0.998898	0.892699
finn-pQTL-R10-v1-MUC2	ukb-saige-153	Colorectal cancer || id:ukb-saige-153	MUC2	Wald ratio	1	0.086864	0.0821687	0.290446	-0.0741866	0.247915	1.09075	0.928498	1.28135	0.892699
finn-pQTL-R10-v1-NAPRT	ukb-saige-153	Colorectal cancer || id:ukb-saige-153	NAPRT	Wald ratio	1	0.132323	0.0702122	0.0594818	-0.00529292	0.269939	1.14148	0.994721	1.30988	0.892699
finn-pQTL-R10-v1-NCR3LG1	ukb-saige-153	Colorectal cancer || id:ukb-saige-153	NCR3LG1	Wald ratio	1	-0.0698213	0.0590796	0.237278	-0.185617	0.0459747	0.93256	0.830591	1.04705	0.892699
finn-pQTL-R10-v1-NECTIN2	ukb-saige-153	Colorectal cancer || id:ukb-saige-153	NECTIN2	Wald ratio	1	0.14783	0.0971452	0.128074	-0.0425749	0.338234	1.15932	0.958319	1.40247	0.892699
finn-pQTL-R10-v1-NELL2	ukb-saige-153	Colorectal cancer || id:ukb-saige-153	NELL2	Wald ratio	1	-0.111619	0.0982244	0.255804	-0.304138	0.0809012	0.894385	0.737759	1.08426	0.892699
finn-pQTL-R10-v1-NID2	ukb-saige-153	Colorectal cancer || id:ukb-saige-153	NID2	Wald ratio	1	0.0677536	0.0374428	0.0703697	-0.00563425	0.141141	1.0701	0.994382	1.15159	0.892699
finn-pQTL-R10-v1-NMI	ukb-saige-153	Colorectal cancer || id:ukb-saige-153	NMI	Wald ratio	1	-0.0487192	0.0284195	0.0864763	-0.104421	0.00698308	0.952449	0.900846	1.00701	0.892699
finn-pQTL-R10-v1-NOS2	ukb-saige-153	Colorectal cancer || id:ukb-saige-153	NOS2	Wald ratio	1	0.126158	0.111019	0.255804	-0.0914394	0.343756	1.13446	0.912617	1.41023	0.892699
finn-pQTL-R10-v1-NT5C	ukb-saige-153	Colorectal cancer || id:ukb-saige-153	NT5C	Wald ratio	1	0.0364806	0.0318563	0.252142	-0.0259577	0.0989189	1.03715	0.974376	1.10398	0.892699
finn-pQTL-R10-v1-NT5C3A	ukb-saige-153	Colorectal cancer || id:ukb-saige-153	NT5C3A	Wald ratio	1	-0.135569	0.0944873	0.151349	-0.320764	0.0496264	0.873219	0.725595	1.05088	0.892699
finn-pQTL-R10-v1-NUDT2	ukb-saige-153	Colorectal cancer || id:ukb-saige-153	NUDT2	Wald ratio	1	0.110747	0.0892129	0.214466	-0.0641103	0.285604	1.11711	0.937902	1.33057	0.892699
finn-pQTL-R10-v1-OCLN	ukb-saige-153	Colorectal cancer || id:ukb-saige-153	OCLN	Wald ratio	1	0.108212	0.0792064	0.171877	-0.047033	0.263456	1.11428	0.954056	1.30142	0.892699
finn-pQTL-R10-v1-ODAM	ukb-saige-153	Colorectal cancer || id:ukb-saige-153	ODAM	Wald ratio	1	0.076054	0.0556216	0.171517	-0.0329643	0.185072	1.07902	0.967573	1.20331	0.892699
finn-pQTL-R10-v1-PAXX	ukb-saige-153	Colorectal cancer || id:ukb-saige-153	PAXX	Wald ratio	1	-0.1076	0.103117	0.296727	-0.309709	0.0945088	0.897987	0.73366	1.09912	0.892699
finn-pQTL-R10-v1-PBLD	ukb-saige-153	Colorectal cancer || id:ukb-saige-153	PBLD	Wald ratio	1	-0.0683499	0.0438141	0.11876	-0.154226	0.0175256	0.933934	0.857079	1.01768	0.892699
finn-pQTL-R10-v1-PCDH12	ukb-saige-153	Colorectal cancer || id:ukb-saige-153	PCDH12	Wald ratio	1	-0.0857183	0.0562526	0.127556	-0.195973	0.0245369	0.917853	0.822034	1.02484	0.892699
finn-pQTL-R10-v1-PCDH17	ukb-saige-153	Colorectal cancer || id:ukb-saige-153	PCDH17	Wald ratio	1	-0.37146	0.216685	0.0864763	-0.796163	0.0532426	0.689727	0.451056	1.05469	0.892699
finn-pQTL-R10-v1-PCSK7	ukb-saige-153	Colorectal cancer || id:ukb-saige-153	PCSK7	Wald ratio	1	-0.0611649	0.0467732	0.190978	-0.15284	0.0305105	0.940668	0.858267	1.03098	0.892699
finn-pQTL-R10-v1-PDGFRA	ukb-saige-153	Colorectal cancer || id:ukb-saige-153	PDGFRA	Wald ratio	1	-0.106119	0.0736334	0.149535	-0.25044	0.0382027	0.899318	0.778458	1.03894	0.892699
finn-pQTL-R10-v1-PDIA5	ukb-saige-153	Colorectal cancer || id:ukb-saige-153	PDIA5	Wald ratio	1	-0.101898	0.0862214	0.237278	-0.270892	0.0670959	0.903122	0.762699	1.0694	0.892699
finn-pQTL-R10-v1-PEPD	ukb-saige-153	Colorectal cancer || id:ukb-saige-153	PEPD	Wald ratio	1	0.0704075	0.0523543	0.178681	-0.0322069	0.173022	1.07295	0.968306	1.18889	0.892699
finn-pQTL-R10-v1-PHYKPL	ukb-saige-153	Colorectal cancer || id:ukb-saige-153	PHYKPL	Wald ratio	1	-0.121277	0.0878213	0.167294	-0.293407	0.0508527	0.885789	0.745719	1.05217	0.892699
finn-pQTL-R10-v1-PLG	ukb-saige-153	Colorectal cancer || id:ukb-saige-153	PLG	Wald ratio	1	-0.0880278	0.0684661	0.198543	-0.222221	0.0461657	0.915735	0.800738	1.04725	0.892699
finn-pQTL-R10-v1-PMM2	ukb-saige-153	Colorectal cancer || id:ukb-saige-153	PMM2	Wald ratio	1	0.158688	0.11603	0.171423	-0.0687306	0.386106	1.17197	0.933578	1.47124	0.892699
finn-pQTL-R10-v1-PNLIPRP1	ukb-saige-153	Colorectal cancer || id:ukb-saige-153	PNLIPRP1	Wald ratio	1	0.0982276	0.0864403	0.255804	-0.0711954	0.267651	1.10321	0.93128	1.30689	0.892699
finn-pQTL-R10-v1-PNLIPRP2	ukb-saige-153	Colorectal cancer || id:ukb-saige-153	PNLIPRP2	Wald ratio	1	0.246609	0.168733	0.143868	-0.0841068	0.577326	1.27968	0.919333	1.78127	0.892699
finn-pQTL-R10-v1-PODXL2	ukb-saige-153	Colorectal cancer || id:ukb-saige-153	PODXL2	Wald ratio	1	-0.142329	0.0986138	0.148936	-0.335612	0.0509539	0.867336	0.7149	1.05227	0.892699
finn-pQTL-R10-v1-PON2	ukb-saige-153	Colorectal cancer || id:ukb-saige-153	PON2	Wald ratio	1	-0.222928	0.137937	0.106059	-0.493285	0.047428	0.800172	0.610617	1.04857	0.892699
finn-pQTL-R10-v1-PRELP	ukb-saige-153	Colorectal cancer || id:ukb-saige-153	PRELP	Wald ratio	1	-0.105078	0.0914798	0.250701	-0.284378	0.0742222	0.900254	0.752482	1.07705	0.892699
finn-pQTL-R10-v1-PROCR	ukb-saige-153	Colorectal cancer || id:ukb-saige-153	PROCR	Wald ratio	1	-0.0924732	0.059559	0.120511	-0.209209	0.0242624	0.911674	0.811226	1.02456	0.892699
finn-pQTL-R10-v1-PSMD9	ukb-saige-153	Colorectal cancer || id:ukb-saige-153	PSMD9	Wald ratio	1	0.115826	0.111193	0.297566	-0.102112	0.333764	1.1228	0.902928	1.39621	0.892699
finn-pQTL-R10-v1-REG4	ukb-saige-153	Colorectal cancer || id:ukb-saige-153	REG4	Wald ratio	1	-0.111215	0.104475	0.287095	-0.315986	0.0935556	0.894746	0.72907	1.09807	0.892699
finn-pQTL-R10-v1-REN	ukb-saige-153	Colorectal cancer || id:ukb-saige-153	REN	Wald ratio	1	0.131681	0.0940578	0.161513	-0.0526724	0.316034	1.14074	0.948691	1.37168	0.892699
finn-pQTL-R10-v1-ROR1	ukb-saige-153	Colorectal cancer || id:ukb-saige-153	ROR1	Wald ratio	1	-0.0739066	0.0579268	0.202004	-0.187443	0.0396299	0.928758	0.829076	1.04043	0.892699
finn-pQTL-R10-v1-S100A4	ukb-saige-153	Colorectal cancer || id:ukb-saige-153	S100A4	Wald ratio	1	0.0980104	0.0784083	0.2113	-0.0556699	0.251691	1.10297	0.945851	1.2862	0.892699
finn-pQTL-R10-v1-SAA4	ukb-saige-153	Colorectal cancer || id:ukb-saige-153	SAA4	Wald ratio	1	0.0679998	0.050813	0.18082	-0.0315937	0.167593	1.07037	0.9689	1.18246	0.892699
finn-pQTL-R10-v1-SCARA5	ukb-saige-153	Colorectal cancer || id:ukb-saige-153	SCARA5	Wald ratio	1	-0.0879934	0.0697879	0.207356	-0.224778	0.0487908	0.915767	0.798694	1.05	0.892699
finn-pQTL-R10-v1-SCARF2	ukb-saige-153	Colorectal cancer || id:ukb-saige-153	SCARF2	Wald ratio	1	-0.103653	0.0621916	0.0955807	-0.225548	0.0182429	0.901538	0.798078	1.01841	0.892699
finn-pQTL-R10-v1-SERPINA12	ukb-saige-153	Colorectal cancer || id:ukb-saige-153	SERPINA12	Wald ratio	1	0.0408433	0.0331852	0.218409	-0.0241997	0.105886	1.04169	0.976091	1.1117	0.892699
finn-pQTL-R10-v1-SERPINI1	ukb-saige-153	Colorectal cancer || id:ukb-saige-153	SERPINI1	Wald ratio	1	-0.0764618	0.0537299	0.154714	-0.181772	0.0288488	0.926388	0.833791	1.02927	0.892699
finn-pQTL-R10-v1-SFTPA2	ukb-saige-153	Colorectal cancer || id:ukb-saige-153	SFTPA2	Wald ratio	1	-0.0571531	0.0361581	0.113959	-0.128023	0.0137167	0.944449	0.879833	1.01381	0.892699
finn-pQTL-R10-v1-SH3GLB2	ukb-saige-153	Colorectal cancer || id:ukb-saige-153	SH3GLB2	Wald ratio	1	0.123989	0.0635065	0.050893	-0.000483859	0.248461	1.132	0.999516	1.28205	0.892699
finn-pQTL-R10-v1-SIGLEC10	ukb-saige-153	Colorectal cancer || id:ukb-saige-153	SIGLEC10	Wald ratio	1	0.0796969	0.0594104	0.17977	-0.0367475	0.196141	1.08296	0.963919	1.2167	0.892699
finn-pQTL-R10-v1-SIGLEC6	ukb-saige-153	Colorectal cancer || id:ukb-saige-153	SIGLEC6	Wald ratio	1	0.0646534	0.0533391	0.225466	-0.0398912	0.169198	1.06679	0.960894	1.18435	0.892699
finn-pQTL-R10-v1-SLAMF7	ukb-saige-153	Colorectal cancer || id:ukb-saige-153	SLAMF7	Wald ratio	1	-0.0460384	0.0320267	0.150576	-0.108811	0.016734	0.955005	0.8969	1.01687	0.892699
finn-pQTL-R10-v1-SMPD1	ukb-saige-153	Colorectal cancer || id:ukb-saige-153	SMPD1	Wald ratio	1	0.0755092	0.0496771	0.128511	-0.0218579	0.172876	1.07843	0.978379	1.18872	0.892699
finn-pQTL-R10-v1-SNCG	ukb-saige-153	Colorectal cancer || id:ukb-saige-153	SNCG	Wald ratio	1	-0.0297	0.0218383	0.17383	-0.072503	0.013103	0.970737	0.930063	1.01319	0.892699
finn-pQTL-R10-v1-SNX15	ukb-saige-153	Colorectal cancer || id:ukb-saige-153	SNX15	Wald ratio	1	-0.0629398	0.0543571	0.246907	-0.16948	0.0436001	0.939	0.844104	1.04456	0.892699
finn-pQTL-R10-v1-SORCS2	ukb-saige-153	Colorectal cancer || id:ukb-saige-153	SORCS2	Wald ratio	1	0.0702006	0.0376686	0.0623728	-0.00362988	0.144031	1.07272	0.996377	1.15492	0.892699
finn-pQTL-R10-v1-SPINK1	ukb-saige-153	Colorectal cancer || id:ukb-saige-153	SPINK1	Wald ratio	1	0.0736708	0.0522825	0.158808	-0.0288029	0.176144	1.07645	0.971608	1.19261	0.892699
finn-pQTL-R10-v1-TBC1D17	ukb-saige-153	Colorectal cancer || id:ukb-saige-153	TBC1D17	Wald ratio	1	0.0576999	0.048468	0.233859	-0.0372972	0.152697	1.0594	0.96339	1.16497	0.892699
finn-pQTL-R10-v1-TCN1	ukb-saige-153	Colorectal cancer || id:ukb-saige-153	TCN1	Wald ratio	1	0.0547484	0.0364989	0.133614	-0.0167895	0.126286	1.05627	0.983351	1.13461	0.892699
finn-pQTL-R10-v1-TEX101	ukb-saige-153	Colorectal cancer || id:ukb-saige-153	TEX101	Wald ratio	1	-0.118595	0.0690005	0.0856599	-0.253835	0.0166464	0.888168	0.775819	1.01679	0.892699
finn-pQTL-R10-v1-TGFBI	ukb-saige-153	Colorectal cancer || id:ukb-saige-153	TGFBI	Wald ratio	1	-0.0443984	0.0345321	0.198543	-0.112081	0.0232845	0.956573	0.893972	1.02356	0.892699
finn-pQTL-R10-v1-TNFSF14	ukb-saige-153	Colorectal cancer || id:ukb-saige-153	TNFSF14	Wald ratio	1	-0.0636278	0.0610307	0.297155	-0.183248	0.0559924	0.938354	0.832562	1.05759	0.892699
finn-pQTL-R10-v1-TREM2	ukb-saige-153	Colorectal cancer || id:ukb-saige-153	TREM2	Wald ratio	1	-0.076333	0.0599759	0.203115	-0.193886	0.0412198	0.926508	0.823752	1.04208	0.892699
finn-pQTL-R10-v1-TSPAN8	ukb-saige-153	Colorectal cancer || id:ukb-saige-153	TSPAN8	Wald ratio	1	-0.103799	0.0531062	0.0506367	-0.207887	0.00028967	0.901407	0.812299	1.00029	0.892699
finn-pQTL-R10-v1-TXNDC15	ukb-saige-153	Colorectal cancer || id:ukb-saige-153	TXNDC15	Wald ratio	1	0.0326015	0.0288756	0.258884	-0.0239947	0.0891977	1.03314	0.976291	1.0933	0.892699
finn-pQTL-R10-v1-VMO1	ukb-saige-153	Colorectal cancer || id:ukb-saige-153	VMO1	Wald ratio	1	0.0395599	0.0312799	0.205977	-0.0217487	0.100868	1.04035	0.978486	1.10613	0.892699
finn-pQTL-R10-v1-VNN1	ukb-saige-153	Colorectal cancer || id:ukb-saige-153	VNN1	Wald ratio	1	0.0395683	0.0256659	0.123155	-0.0107369	0.0898735	1.04036	0.989321	1.09404	0.892699
finn-pQTL-R10-v1-VSIG10	ukb-saige-153	Colorectal cancer || id:ukb-saige-153	VSIG10	Wald ratio	1	0.0319411	0.0253326	0.207356	-0.0177108	0.0815931	1.03246	0.982445	1.08501	0.892699
finn-pQTL-R10-v1-ADA	ukb-saige-153	Colorectal cancer || id:ukb-saige-153	ADA	Wald ratio	1	0.0339486	0.0332106	0.306676	-0.0311441	0.0990413	1.03453	0.969336	1.10411	0.895936
finn-pQTL-R10-v1-ADAM8	ukb-saige-153	Colorectal cancer || id:ukb-saige-153	ADAM8	Wald ratio	1	0.0498539	0.0498539	0.317311	-0.0478598	0.147568	1.05112	0.953267	1.15901	0.895936
finn-pQTL-R10-v1-FBP1	ukb-saige-153	Colorectal cancer || id:ukb-saige-153	FBP1	Wald ratio	1	0.0762469	0.0762469	0.317311	-0.073197	0.225691	1.07923	0.929418	1.25319	0.895936
finn-pQTL-R10-v1-KLK14	ukb-saige-153	Colorectal cancer || id:ukb-saige-153	KLK14	Wald ratio	1	-0.0602877	0.0602877	0.317311	-0.178452	0.0578762	0.941494	0.836565	1.05958	0.895936
finn-pQTL-R10-v1-MIF	ukb-saige-153	Colorectal cancer || id:ukb-saige-153	MIF	Wald ratio	1	0.0945964	0.0945964	0.317311	-0.0908125	0.280005	1.09922	0.913189	1.32314	0.895936
finn-pQTL-R10-v1-NFKBIE	ukb-saige-153	Colorectal cancer || id:ukb-saige-153	NFKBIE	Wald ratio	1	0.0826864	0.0826864	0.317311	-0.079379	0.244752	1.0862	0.92369	1.2773	0.895936
finn-pQTL-R10-v1-NPPB	ukb-saige-153	Colorectal cancer || id:ukb-saige-153	NPPB	Wald ratio	1	-0.0787949	0.0787949	0.317311	-0.233233	0.0756431	0.924229	0.791969	1.07858	0.895936
finn-pQTL-R10-v1-SCARF1	ukb-saige-153	Colorectal cancer || id:ukb-saige-153	SCARF1	Wald ratio	1	-0.0334248	0.0334248	0.317311	-0.0989374	0.0320878	0.967128	0.905799	1.03261	0.895936
finn-pQTL-R10-v1-SDK2	ukb-saige-153	Colorectal cancer || id:ukb-saige-153	SDK2	Wald ratio	1	-0.0427414	0.0413627	0.301448	-0.123812	0.0383294	0.958159	0.883546	1.03907	0.895936
finn-pQTL-R10-v1-THOP1	ukb-saige-153	Colorectal cancer || id:ukb-saige-153	THOP1	Wald ratio	1	-0.0743302	0.0743302	0.317311	-0.220017	0.071357	0.928365	0.802505	1.07396	0.895936
finn-pQTL-R10-v1-TNFRSF10C	ukb-saige-153	Colorectal cancer || id:ukb-saige-153	TNFRSF10C	Wald ratio	1	0.0720815	0.0720815	0.317311	-0.0691982	0.213361	1.07474	0.933142	1.23783	0.895936
finn-pQTL-R10-v1-AMPD3	ukb-saige-153	Colorectal cancer || id:ukb-saige-153	AMPD3	Inverse variance weighted	2	-0.121359	0.090699	0.180883	-0.299129	0.0564109	0.885716	0.741464	1.05803	0.906158
finn-pQTL-R10-v1-ANG	ukb-saige-153	Colorectal cancer || id:ukb-saige-153	ANG	Inverse variance weighted	2	0.053319	0.040793	0.191191	-0.0266352	0.133273	1.05477	0.973716	1.14256	0.906158
finn-pQTL-R10-v1-C8B	ukb-saige-153	Colorectal cancer || id:ukb-saige-153	C8B	Inverse variance weighted	2	0.0489094	0.0410931	0.233964	-0.0316331	0.129452	1.05013	0.968862	1.1382	0.906158
finn-pQTL-R10-v1-FAM3B	ukb-saige-153	Colorectal cancer || id:ukb-saige-153	FAM3B	Inverse variance weighted	2	0.0562722	0.0480205	0.241262	-0.0378479	0.150392	1.05789	0.962859	1.16229	0.906158
finn-pQTL-R10-v1-FCRL3	ukb-saige-153	Colorectal cancer || id:ukb-saige-153	FCRL3	Inverse variance weighted	2	-0.0250265	0.0211114	0.235841	-0.0664049	0.0163519	0.975284	0.935752	1.01649	0.906158
finn-pQTL-R10-v1-GASK1A	ukb-saige-153	Colorectal cancer || id:ukb-saige-153	GASK1A	Inverse variance weighted	3	-0.0466505	0.0376208	0.214969	-0.120387	0.0270863	0.954421	0.886577	1.02746	0.906158
finn-pQTL-R10-v1-HDGF	ukb-saige-153	Colorectal cancer || id:ukb-saige-153	HDGF	Inverse variance weighted	2	-0.0267253	0.0211026	0.205353	-0.0680863	0.0146357	0.973629	0.93418	1.01474	0.906158
finn-pQTL-R10-v1-HSBP1	ukb-saige-153	Colorectal cancer || id:ukb-saige-153	HSBP1	Inverse variance weighted	2	-0.0642808	0.0497809	0.196609	-0.161851	0.0332898	0.937742	0.850568	1.03385	0.906158
finn-pQTL-R10-v1-HSD17B14	ukb-saige-153	Colorectal cancer || id:ukb-saige-153	HSD17B14	Inverse variance weighted	3	-0.0398416	0.0305626	0.192367	-0.0997443	0.0200611	0.960942	0.905069	1.02026	0.906158
finn-pQTL-R10-v1-IL15RA	ukb-saige-153	Colorectal cancer || id:ukb-saige-153	IL15RA	Inverse variance weighted	2	-0.058375	0.047328	0.217422	-0.151138	0.0343879	0.943296	0.859729	1.03499	0.906158
finn-pQTL-R10-v1-IL1R2	ukb-saige-153	Colorectal cancer || id:ukb-saige-153	IL1R2	Inverse variance weighted	2	0.0458589	0.0365257	0.209288	-0.0257315	0.117449	1.04693	0.974597	1.12462	0.906158
finn-pQTL-R10-v1-IL5RA	ukb-saige-153	Colorectal cancer || id:ukb-saige-153	IL5RA	Inverse variance weighted	3	-0.0594592	0.0506597	0.240516	-0.158752	0.0398338	0.942274	0.853208	1.04064	0.906158
finn-pQTL-R10-v1-ITIH4	ukb-saige-153	Colorectal cancer || id:ukb-saige-153	ITIH4	Inverse variance weighted	2	0.0634275	0.0541416	0.241393	-0.04269	0.169545	1.06548	0.958208	1.18477	0.906158
finn-pQTL-R10-v1-KLK4	ukb-saige-153	Colorectal cancer || id:ukb-saige-153	KLK4	Inverse variance weighted	2	0.0610132	0.0464775	0.189268	-0.0300827	0.152109	1.06291	0.970365	1.16429	0.906158
finn-pQTL-R10-v1-LILRB2	ukb-saige-153	Colorectal cancer || id:ukb-saige-153	LILRB2	Inverse variance weighted	2	0.0261296	0.0226635	0.248936	-0.0182909	0.0705501	1.02647	0.981875	1.0731	0.906158
finn-pQTL-R10-v1-LRP11	ukb-saige-153	Colorectal cancer || id:ukb-saige-153	LRP11	Inverse variance weighted	2	-0.0363284	0.03179	0.253137	-0.0986368	0.02598	0.964324	0.906072	1.02632	0.906158
finn-pQTL-R10-v1-LY75	ukb-saige-153	Colorectal cancer || id:ukb-saige-153	LY75	Inverse variance weighted	4	-0.0246864	0.0211711	0.243597	-0.0661817	0.0168089	0.975616	0.935961	1.01695	0.906158
finn-pQTL-R10-v1-MBL2	ukb-saige-153	Colorectal cancer || id:ukb-saige-153	MBL2	Inverse variance weighted	3	-0.025354	0.0211185	0.229922	-0.0667463	0.0160383	0.974965	0.935432	1.01617	0.906158
finn-pQTL-R10-v1-MELTF	ukb-saige-153	Colorectal cancer || id:ukb-saige-153	MELTF	Inverse variance weighted	4	-0.0696062	0.0520275	0.180937	-0.17158	0.0323676	0.932761	0.842333	1.0329	0.906158
finn-pQTL-R10-v1-PINLYP	ukb-saige-153	Colorectal cancer || id:ukb-saige-153	PINLYP	Inverse variance weighted	2	0.0277111	0.0240805	0.249827	-0.0194867	0.0749089	1.0281	0.980702	1.07779	0.906158
finn-pQTL-R10-v1-PLB1	ukb-saige-153	Colorectal cancer || id:ukb-saige-153	PLB1	Inverse variance weighted	3	-0.0739642	0.0598542	0.216555	-0.191279	0.0433501	0.928705	0.825902	1.0443	0.906158
finn-pQTL-R10-v1-RET	ukb-saige-153	Colorectal cancer || id:ukb-saige-153	RET	Inverse variance weighted	2	0.063688	0.0539991	0.238228	-0.0421503	0.169526	1.06576	0.958726	1.18474	0.906158
finn-pQTL-R10-v1-CA5A	ukb-saige-153	Colorectal cancer || id:ukb-saige-153	CA5A	Wald ratio	1	0.0289672	0.0300814	0.335566	-0.0299922	0.0879267	1.02939	0.970453	1.09191	0.912709
finn-pQTL-R10-v1-CTRB1	ukb-saige-153	Colorectal cancer || id:ukb-saige-153	CTRB1	Wald ratio	1	0.043843	0.0457492	0.337895	-0.0458255	0.133512	1.04482	0.955209	1.14283	0.912709
finn-pQTL-R10-v1-CTRC	ukb-saige-153	Colorectal cancer || id:ukb-saige-153	CTRC	Wald ratio	1	0.0708122	0.0728354	0.33094	-0.0719452	0.21357	1.07338	0.930582	1.23809	0.912709
finn-pQTL-R10-v1-GIPC2	ukb-saige-153	Colorectal cancer || id:ukb-saige-153	GIPC2	Wald ratio	1	-0.0822757	0.0857039	0.337055	-0.250255	0.0857039	0.921018	0.778602	1.08948	0.912709
finn-pQTL-R10-v1-LGALS1	ukb-saige-153	Colorectal cancer || id:ukb-saige-153	LGALS1	Wald ratio	1	0.106597	0.111442	0.338809	-0.11183	0.325024	1.11249	0.894196	1.38406	0.912709
finn-pQTL-R10-v1-RNASET2	ukb-saige-153	Colorectal cancer || id:ukb-saige-153	RNASET2	Wald ratio	1	0.0598967	0.0622926	0.336281	-0.0621968	0.18199	1.06173	0.939698	1.1996	0.912709
finn-pQTL-R10-v1-SPINK4	ukb-saige-153	Colorectal cancer || id:ukb-saige-153	SPINK4	Wald ratio	1	-0.0253658	0.0262405	0.333711	-0.0767973	0.0260656	0.974953	0.926078	1.02641	0.912709
finn-pQTL-R10-v1-TFPI	ukb-saige-153	Colorectal cancer || id:ukb-saige-153	TFPI	Wald ratio	1	-0.0501393	0.0524183	0.338809	-0.152879	0.0526006	0.951097	0.858233	1.05401	0.912709
finn-pQTL-R10-v1-TLR3	ukb-saige-153	Colorectal cancer || id:ukb-saige-153	TLR3	Wald ratio	1	-0.0516799	0.0538332	0.337055	-0.157193	0.0538332	0.949633	0.854539	1.05531	0.912709
finn-pQTL-R10-v1-APOBR	ukb-saige-153	Colorectal cancer || id:ukb-saige-153	APOBR	Inverse variance weighted	2	-0.0849821	0.0777923	0.274647	-0.237455	0.0674909	0.918529	0.788632	1.06982	0.916728
finn-pQTL-R10-v1-F12	ukb-saige-153	Colorectal cancer || id:ukb-saige-153	F12	Inverse variance weighted	2	-0.0232804	0.0212378	0.273002	-0.0649065	0.0183458	0.976989	0.937155	1.01852	0.916728
finn-pQTL-R10-v1-LTBP3	ukb-saige-153	Colorectal cancer || id:ukb-saige-153	LTBP3	Inverse variance weighted	2	0.0586542	0.0529644	0.268109	-0.0451559	0.162464	1.06041	0.955848	1.17641	0.916728
finn-pQTL-R10-v1-MMP7	ukb-saige-153	Colorectal cancer || id:ukb-saige-153	MMP7	Inverse variance weighted	2	0.061704	0.0554627	0.26591	-0.0470029	0.170411	1.06365	0.954085	1.18579	0.916728
finn-pQTL-R10-v1-NELL1	ukb-saige-153	Colorectal cancer || id:ukb-saige-153	NELL1	Inverse variance weighted	3	-0.0593575	0.0541268	0.272799	-0.165446	0.0467309	0.94237	0.847516	1.04784	0.916728
finn-pQTL-R10-v1-ITGA11	ukb-saige-153	Colorectal cancer || id:ukb-saige-153	ITGA11	Wald ratio	1	0.0738012	0.0780184	0.344176	-0.0791149	0.226717	1.07659	0.923934	1.25448	0.917803
finn-pQTL-R10-v1-RBKS	ukb-saige-153	Colorectal cancer || id:ukb-saige-153	RBKS	Wald ratio	1	-0.121974	0.128878	0.34393	-0.374576	0.130628	0.885171	0.687581	1.13954	0.917803
finn-pQTL-R10-v1-FAM3C	ukb-saige-153	Colorectal cancer || id:ukb-saige-153	FAM3C	Wald ratio	1	-0.0994678	0.105955	0.347846	-0.307139	0.108204	0.905319	0.735548	1.11427	0.922928
finn-pQTL-R10-v1-NOTCH2	ukb-saige-153	Colorectal cancer || id:ukb-saige-153	NOTCH2	Wald ratio	1	-0.0796473	0.085774	0.353111	-0.247764	0.0884697	0.923442	0.780544	1.0925	0.931183
finn-pQTL-R10-v1-PHACTR2	ukb-saige-153	Colorectal cancer || id:ukb-saige-153	PHACTR2	Wald ratio	1	-0.105472	0.11391	0.354484	-0.328736	0.117791	0.899899	0.719833	1.12501	0.931183
finn-pQTL-R10-v1-ADAMTS13	ukb-saige-153	Colorectal cancer || id:ukb-saige-153	ADAMTS13	Wald ratio	1	0.0536905	0.0618932	0.385685	-0.0676202	0.175001	1.05516	0.934615	1.19125	0.933804
finn-pQTL-R10-v1-ADAMTSL5	ukb-saige-153	Colorectal cancer || id:ukb-saige-153	ADAMTSL5	Wald ratio	1	0.0464558	0.056236	0.408755	-0.0637667	0.156678	1.04755	0.938224	1.16962	0.933804
finn-pQTL-R10-v1-ALDH3A1	ukb-saige-153	Colorectal cancer || id:ukb-saige-153	ALDH3A1	Wald ratio	1	-0.0341355	0.0395253	0.387788	-0.111605	0.0433341	0.966441	0.894397	1.04429	0.933804
finn-pQTL-R10-v1-AMIGO2	ukb-saige-153	Colorectal cancer || id:ukb-saige-153	AMIGO2	Wald ratio	1	-0.0810376	0.0945439	0.391366	-0.266344	0.104268	0.922159	0.766176	1.1099	0.933804
finn-pQTL-R10-v1-AOC1	ukb-saige-153	Colorectal cancer || id:ukb-saige-153	AOC1	Wald ratio	1	0.0598007	0.0804217	0.457125	-0.0978257	0.217427	1.06162	0.906807	1.24287	0.933804
finn-pQTL-R10-v1-ART5	ukb-saige-153	Colorectal cancer || id:ukb-saige-153	ART5	Wald ratio	1	-0.0786666	0.0869473	0.365592	-0.249083	0.0917501	0.924348	0.779515	1.09609	0.933804
finn-pQTL-R10-v1-ASGR2	ukb-saige-153	Colorectal cancer || id:ukb-saige-153	ASGR2	Wald ratio	1	-0.0801771	0.0979942	0.413253	-0.272246	0.111892	0.922953	0.761667	1.11839	0.933804
finn-pQTL-R10-v1-ASPN	ukb-saige-153	Colorectal cancer || id:ukb-saige-153	ASPN	Wald ratio	1	-0.0775153	0.0856748	0.365592	-0.245438	0.0904073	0.925413	0.782362	1.09462	0.933804
finn-pQTL-R10-v1-ASPSCR1	ukb-saige-153	Colorectal cancer || id:ukb-saige-153	ASPSCR1	Wald ratio	1	0.0508688	0.0658302	0.439684	-0.0781584	0.179896	1.05218	0.924818	1.19709	0.933804
finn-pQTL-R10-v1-BPIFB1	ukb-saige-153	Colorectal cancer || id:ukb-saige-153	BPIFB1	Wald ratio	1	0.0443393	0.0513402	0.387788	-0.0562875	0.144966	1.04534	0.945267	1.156	0.933804
finn-pQTL-R10-v1-C1QTNF1	ukb-saige-153	Colorectal cancer || id:ukb-saige-153	C1QTNF1	Wald ratio	1	-0.0824898	0.110657	0.455997	-0.299378	0.134398	0.920821	0.741279	1.14385	0.933804
finn-pQTL-R10-v1-C9	ukb-saige-153	Colorectal cancer || id:ukb-saige-153	C9	Wald ratio	1	-0.0830464	0.103808	0.423711	-0.28651	0.120417	0.920308	0.75088	1.12797	0.933804
finn-pQTL-R10-v1-CTHRC1	ukb-saige-153	Colorectal cancer || id:ukb-saige-153	CTHRC1	Wald ratio	1	-0.210888	0.285319	0.459828	-0.770113	0.348337	0.809865	0.462961	1.41671	0.933804
finn-pQTL-R10-v1-CXCL1	ukb-saige-153	Colorectal cancer || id:ukb-saige-153	CXCL1	Wald ratio	1	0.0745809	0.0942074	0.428555	-0.110066	0.259227	1.07743	0.895775	1.29593	0.933804
finn-pQTL-R10-v1-DLK1	ukb-saige-153	Colorectal cancer || id:ukb-saige-153	DLK1	Wald ratio	1	-0.090812	0.122127	0.457125	-0.33018	0.148556	0.913189	0.718794	1.16016	0.933804
finn-pQTL-R10-v1-DNAJB6	ukb-saige-153	Colorectal cancer || id:ukb-saige-153	DNAJB6	Wald ratio	1	-0.0675719	0.0874459	0.439684	-0.238966	0.103822	0.934661	0.787442	1.1094	0.933804
finn-pQTL-R10-v1-DPP6	ukb-saige-153	Colorectal cancer || id:ukb-saige-153	DPP6	Wald ratio	1	-0.0726601	0.0830401	0.381574	-0.235419	0.0900985	0.929917	0.79024	1.09428	0.933804
finn-pQTL-R10-v1-DSC2	ukb-saige-153	Colorectal cancer || id:ukb-saige-153	DSC2	Wald ratio	1	-0.0552277	0.0729006	0.448705	-0.198113	0.0876575	0.94627	0.820277	1.09161	0.933804
finn-pQTL-R10-v1-ECHDC3	ukb-saige-153	Colorectal cancer || id:ukb-saige-153	ECHDC3	Wald ratio	1	0.0276258	0.0340719	0.417474	-0.039155	0.0944067	1.02801	0.961602	1.09901	0.933804
finn-pQTL-R10-v1-ENPP2	ukb-saige-153	Colorectal cancer || id:ukb-saige-153	ENPP2	Wald ratio	1	-0.0423178	0.0540727	0.433857	-0.1483	0.0636648	0.958565	0.862172	1.06574	0.933804
finn-pQTL-R10-v1-FGF5	ukb-saige-153	Colorectal cancer || id:ukb-saige-153	FGF5	Wald ratio	1	0.0259835	0.0311802	0.404657	-0.0351297	0.0870968	1.02632	0.96548	1.091	0.933804
finn-pQTL-R10-v1-GAS6	ukb-saige-153	Colorectal cancer || id:ukb-saige-153	GAS6	Wald ratio	1	-0.0448885	0.0607315	0.459828	-0.163922	0.0741453	0.956104	0.848808	1.07696	0.933804
finn-pQTL-R10-v1-GLB1	ukb-saige-153	Colorectal cancer || id:ukb-saige-153	GLB1	Wald ratio	1	0.0852404	0.103186	0.408755	-0.117004	0.287484	1.08898	0.889582	1.33307	0.933804
finn-pQTL-R10-v1-GLO1	ukb-saige-153	Colorectal cancer || id:ukb-saige-153	GLO1	Wald ratio	1	0.0402481	0.0469561	0.391366	-0.0517859	0.132282	1.04107	0.949532	1.14143	0.933804
finn-pQTL-R10-v1-GRIK2	ukb-saige-153	Colorectal cancer || id:ukb-saige-153	GRIK2	Wald ratio	1	-0.0493583	0.0634607	0.4367	-0.173741	0.0750247	0.95184	0.840514	1.07791	0.933804
finn-pQTL-R10-v1-GZMH	ukb-saige-153	Colorectal cancer || id:ukb-saige-153	GZMH	Wald ratio	1	0.0484493	0.0598812	0.418463	-0.0689178	0.165817	1.04964	0.933403	1.18036	0.933804
finn-pQTL-R10-v1-HS3ST3B1	ukb-saige-153	Colorectal cancer || id:ukb-saige-153	HS3ST3B1	Wald ratio	1	-0.0624373	0.0808013	0.439684	-0.220808	0.0959331	0.939472	0.801871	1.10069	0.933804
finn-pQTL-R10-v1-HSPA1A	ukb-saige-153	Colorectal cancer || id:ukb-saige-153	HSPA1A	Wald ratio	1	0.0761285	0.0897925	0.396535	-0.0998649	0.252122	1.0791	0.90496	1.28675	0.933804
finn-pQTL-R10-v1-IGFBP7	ukb-saige-153	Colorectal cancer || id:ukb-saige-153	IGFBP7	Wald ratio	1	0.0543228	0.0620832	0.381574	-0.0673603	0.176006	1.05583	0.934858	1.19245	0.933804
finn-pQTL-R10-v1-IL12RB1	ukb-saige-153	Colorectal cancer || id:ukb-saige-153	IL12RB1	Wald ratio	1	-0.0446113	0.0579947	0.441756	-0.158281	0.0690583	0.956369	0.85361	1.0715	0.933804
finn-pQTL-R10-v1-IL16	ukb-saige-153	Colorectal cancer || id:ukb-saige-153	IL16	Wald ratio	1	-0.0286344	0.0321052	0.372451	-0.0915607	0.0342919	0.971772	0.912506	1.03489	0.933804
finn-pQTL-R10-v1-IL17F	ukb-saige-153	Colorectal cancer || id:ukb-saige-153	IL17F	Wald ratio	1	-0.0707642	0.0902853	0.433167	-0.247723	0.106195	0.931682	0.780576	1.11204	0.933804
finn-pQTL-R10-v1-IL19	ukb-saige-153	Colorectal cancer || id:ukb-saige-153	IL19	Wald ratio	1	0.0537238	0.0665152	0.419268	-0.076646	0.184094	1.05519	0.926218	1.20213	0.933804
finn-pQTL-R10-v1-IMPA1	ukb-saige-153	Colorectal cancer || id:ukb-saige-153	IMPA1	Wald ratio	1	0.0738041	0.0843476	0.381574	-0.0915171	0.239125	1.0766	0.912546	1.27014	0.933804
finn-pQTL-R10-v1-KLK13	ukb-saige-153	Colorectal cancer || id:ukb-saige-153	KLK13	Wald ratio	1	0.0326753	0.0399365	0.413253	-0.0456003	0.110951	1.03322	0.955424	1.11734	0.933804
finn-pQTL-R10-v1-KLK6	ukb-saige-153	Colorectal cancer || id:ukb-saige-153	KLK6	Wald ratio	1	0.089138	0.108946	0.413253	-0.124397	0.302673	1.09323	0.883029	1.35347	0.933804
finn-pQTL-R10-v1-KYAT1	ukb-saige-153	Colorectal cancer || id:ukb-saige-153	KYAT1	Wald ratio	1	0.0862405	0.108935	0.428555	-0.127273	0.299754	1.09007	0.880493	1.34953	0.933804
finn-pQTL-R10-v1-LHPP	ukb-saige-153	Colorectal cancer || id:ukb-saige-153	LHPP	Wald ratio	1	-0.0529537	0.0673957	0.432035	-0.185049	0.0791418	0.948424	0.831063	1.08236	0.933804
finn-pQTL-R10-v1-LPO	ukb-saige-153	Colorectal cancer || id:ukb-saige-153	LPO	Wald ratio	1	-0.0697244	0.0757874	0.357573	-0.218268	0.0788189	0.932651	0.80391	1.08201	0.933804
finn-pQTL-R10-v1-NAGA	ukb-saige-153	Colorectal cancer || id:ukb-saige-153	NAGA	Wald ratio	1	-0.0857504	0.112547	0.446117	-0.306343	0.134843	0.917823	0.736134	1.14436	0.933804
finn-pQTL-R10-v1-NRP1	ukb-saige-153	Colorectal cancer || id:ukb-saige-153	NRP1	Wald ratio	1	-0.0446647	0.0578013	0.439684	-0.157955	0.068626	0.956318	0.853888	1.07104	0.933804
finn-pQTL-R10-v1-OMP	ukb-saige-153	Colorectal cancer || id:ukb-saige-153	OMP	Wald ratio	1	0.110729	0.126933	0.383023	-0.13806	0.359518	1.11709	0.871046	1.43264	0.933804
finn-pQTL-R10-v1-OPTC	ukb-saige-153	Colorectal cancer || id:ukb-saige-153	OPTC	Wald ratio	1	0.0762753	0.101181	0.450942	-0.12204	0.274591	1.07926	0.885113	1.31599	0.933804
finn-pQTL-R10-v1-PGLYRP4	ukb-saige-153	Colorectal cancer || id:ukb-saige-153	PGLYRP4	Wald ratio	1	-0.0360438	0.0473718	0.446735	-0.128893	0.056805	0.964598	0.879068	1.05845	0.933804
finn-pQTL-R10-v1-PLA2G4A	ukb-saige-153	Colorectal cancer || id:ukb-saige-153	PLA2G4A	Wald ratio	1	0.178239	0.207945	0.391366	-0.229334	0.585811	1.19511	0.795063	1.79645	0.933804
finn-pQTL-R10-v1-PLA2G7	ukb-saige-153	Colorectal cancer || id:ukb-saige-153	PLA2G7	Wald ratio	1	0.0913126	0.111604	0.413253	-0.127432	0.310057	1.09561	0.880353	1.3635	0.933804
finn-pQTL-R10-v1-REG1A	ukb-saige-153	Colorectal cancer || id:ukb-saige-153	REG1A	Wald ratio	1	-0.0524797	0.0679149	0.439684	-0.185593	0.0806335	0.948874	0.830612	1.08397	0.933804
finn-pQTL-R10-v1-RGMA	ukb-saige-153	Colorectal cancer || id:ukb-saige-153	RGMA	Wald ratio	1	-0.059539	0.0770505	0.439684	-0.210558	0.09148	0.942199	0.810132	1.09579	0.933804
finn-pQTL-R10-v1-RNASE3	ukb-saige-153	Colorectal cancer || id:ukb-saige-153	RNASE3	Wald ratio	1	-0.0721752	0.0962337	0.453255	-0.260793	0.116443	0.930368	0.77044	1.12349	0.933804
finn-pQTL-R10-v1-SERPING1	ukb-saige-153	Colorectal cancer || id:ukb-saige-153	SERPING1	Wald ratio	1	0.0570827	0.0665964	0.391366	-0.0734464	0.187612	1.05874	0.929186	1.20636	0.933804
finn-pQTL-R10-v1-SIGLEC5	ukb-saige-153	Colorectal cancer || id:ukb-saige-153	SIGLEC5	Wald ratio	1	-0.0266252	0.0310628	0.391366	-0.0875083	0.0342578	0.973726	0.916211	1.03485	0.933804
finn-pQTL-R10-v1-SLAMF8	ukb-saige-153	Colorectal cancer || id:ukb-saige-153	SLAMF8	Wald ratio	1	0.0203335	0.0258079	0.430768	-0.0302499	0.0709169	1.02054	0.970203	1.07349	0.933804
finn-pQTL-R10-v1-SUMF2	ukb-saige-153	Colorectal cancer || id:ukb-saige-153	SUMF2	Wald ratio	1	-0.0379868	0.049576	0.443537	-0.135156	0.0591822	0.962726	0.87358	1.06097	0.933804
finn-pQTL-R10-v1-TCTN3	ukb-saige-153	Colorectal cancer || id:ukb-saige-153	TCTN3	Wald ratio	1	-0.0279976	0.0345853	0.418214	-0.0957847	0.0397895	0.972391	0.90866	1.04059	0.933804
finn-pQTL-R10-v1-TGFB1	ukb-saige-153	Colorectal cancer || id:ukb-saige-153	TGFB1	Wald ratio	1	0.0571187	0.0695358	0.411402	-0.0791715	0.193409	1.05878	0.923881	1.21338	0.933804
finn-pQTL-R10-v1-THTPA	ukb-saige-153	Colorectal cancer || id:ukb-saige-153	THTPA	Wald ratio	1	0.0270332	0.0312571	0.387113	-0.0342308	0.0882972	1.0274	0.966348	1.09231	0.933804
finn-pQTL-R10-v1-TYMP	ukb-saige-153	Colorectal cancer || id:ukb-saige-153	TYMP	Wald ratio	1	0.0383361	0.0468553	0.413253	-0.0535002	0.130172	1.03908	0.947906	1.13902	0.933804
finn-pQTL-R10-v1-VEGFA	ukb-saige-153	Colorectal cancer || id:ukb-saige-153	VEGFA	Wald ratio	1	-0.033344	0.0411896	0.418214	-0.114076	0.0473877	0.967206	0.89219	1.04853	0.933804
finn-pQTL-R10-v1-VSTM1	ukb-saige-153	Colorectal cancer || id:ukb-saige-153	VSTM1	Wald ratio	1	0.0267534	0.0295695	0.365592	-0.0312029	0.0847096	1.02711	0.969279	1.0884	0.933804
finn-pQTL-R10-v1-AGRP	ukb-saige-153	Colorectal cancer || id:ukb-saige-153	AGRP	Wald ratio	1	-0.0784182	0.116568	0.501121	-0.306891	0.150054	0.924578	0.735731	1.1619	0.935551
finn-pQTL-R10-v1-APEX1	ukb-saige-153	Colorectal cancer || id:ukb-saige-153	APEX1	Wald ratio	1	0.0409315	0.0573041	0.475051	-0.0713845	0.153248	1.04178	0.931104	1.16561	0.935551
finn-pQTL-R10-v1-BOLA1	ukb-saige-153	Colorectal cancer || id:ukb-saige-153	BOLA1	Wald ratio	1	-0.0503929	0.0755893	0.504985	-0.198548	0.0977622	0.950856	0.81992	1.1027	0.935551
finn-pQTL-R10-v1-ECM1	ukb-saige-153	Colorectal cancer || id:ukb-saige-153	ECM1	Wald ratio	1	-0.0246057	0.0338328	0.467059	-0.0909179	0.0417066	0.975695	0.913093	1.04259	0.935551
finn-pQTL-R10-v1-F7	ukb-saige-153	Colorectal cancer || id:ukb-saige-153	F7	Wald ratio	1	0.0286311	0.0405607	0.480261	-0.0508679	0.10813	1.02904	0.950404	1.11419	0.935551
finn-pQTL-R10-v1-GCNT1	ukb-saige-153	Colorectal cancer || id:ukb-saige-153	GCNT1	Wald ratio	1	0.0427169	0.0584547	0.46492	-0.0718543	0.157288	1.04364	0.930666	1.17033	0.935551
finn-pQTL-R10-v1-GIMAP7	ukb-saige-153	Colorectal cancer || id:ukb-saige-153	GIMAP7	Wald ratio	1	0.0285353	0.0396324	0.471525	-0.0491442	0.106215	1.02895	0.952044	1.11206	0.935551
finn-pQTL-R10-v1-GP1BA	ukb-saige-153	Colorectal cancer || id:ukb-saige-153	GP1BA	Wald ratio	1	0.0745983	0.108507	0.491768	-0.138075	0.287271	1.07745	0.871034	1.33279	0.935551
finn-pQTL-R10-v1-GPC1	ukb-saige-153	Colorectal cancer || id:ukb-saige-153	GPC1	Wald ratio	1	0.0417156	0.0608353	0.492893	-0.0775215	0.160953	1.0426	0.925407	1.17463	0.935551
finn-pQTL-R10-v1-IDI2	ukb-saige-153	Colorectal cancer || id:ukb-saige-153	IDI2	Wald ratio	1	-0.0580304	0.0812426	0.475051	-0.217266	0.101205	0.943621	0.804716	1.1065	0.935551
finn-pQTL-R10-v1-IFNAR1	ukb-saige-153	Colorectal cancer || id:ukb-saige-153	IFNAR1	Wald ratio	1	0.0388853	0.0548969	0.478738	-0.0687126	0.146483	1.03965	0.933595	1.15776	0.935551
finn-pQTL-R10-v1-IL1R1	ukb-saige-153	Colorectal cancer || id:ukb-saige-153	IL1R1	Wald ratio	1	-0.0793869	0.116434	0.495354	-0.307598	0.148824	0.923682	0.735211	1.16047	0.935551
finn-pQTL-R10-v1-IL32	ukb-saige-153	Colorectal cancer || id:ukb-saige-153	IL32	Wald ratio	1	0.05299	0.0763056	0.487404	-0.096569	0.202549	1.05442	0.907947	1.22452	0.935551
finn-pQTL-R10-v1-ITIH3	ukb-saige-153	Colorectal cancer || id:ukb-saige-153	ITIH3	Wald ratio	1	0.0487217	0.0714585	0.495354	-0.091337	0.18878	1.04993	0.91271	1.20778	0.935551
finn-pQTL-R10-v1-KDR	ukb-saige-153	Colorectal cancer || id:ukb-saige-153	KDR	Wald ratio	1	0.0296562	0.0437429	0.497793	-0.0560799	0.115392	1.0301	0.945464	1.12231	0.935551
finn-pQTL-R10-v1-LTBR	ukb-saige-153	Colorectal cancer || id:ukb-saige-153	LTBR	Wald ratio	1	0.0408344	0.0598905	0.495354	-0.076551	0.15822	1.04168	0.926306	1.17142	0.935551
finn-pQTL-R10-v1-NHLRC3	ukb-saige-153	Colorectal cancer || id:ukb-saige-153	NHLRC3	Wald ratio	1	-0.0437554	0.0643947	0.496829	-0.169969	0.0824582	0.957188	0.843691	1.08595	0.935551
finn-pQTL-R10-v1-RARRES2	ukb-saige-153	Colorectal cancer || id:ukb-saige-153	RARRES2	Wald ratio	1	0.0613169	0.0865651	0.478738	-0.108351	0.230985	1.06324	0.897313	1.25984	0.935551
finn-pQTL-R10-v1-RECK	ukb-saige-153	Colorectal cancer || id:ukb-saige-153	RECK	Wald ratio	1	-0.0704268	0.10564	0.504985	-0.277482	0.136628	0.931996	0.75769	1.1464	0.935551
finn-pQTL-R10-v1-SERPINA1	ukb-saige-153	Colorectal cancer || id:ukb-saige-153	SERPINA1	Wald ratio	1	0.0337973	0.0506959	0.504985	-0.0655667	0.133161	1.03437	0.936537	1.14243	0.935551
finn-pQTL-R10-v1-SIGLEC9	ukb-saige-153	Colorectal cancer || id:ukb-saige-153	SIGLEC9	Wald ratio	1	-0.0196768	0.0295152	0.504985	-0.0775267	0.038173	0.980516	0.925402	1.03891	0.935551
finn-pQTL-R10-v1-SMOC2	ukb-saige-153	Colorectal cancer || id:ukb-saige-153	SMOC2	Wald ratio	1	-0.0382242	0.0573363	0.504985	-0.150603	0.0741549	0.962497	0.860189	1.07697	0.935551
finn-pQTL-R10-v1-TDGF1	ukb-saige-153	Colorectal cancer || id:ukb-saige-153	TDGF1	Wald ratio	1	0.0163781	0.0227473	0.471525	-0.0282067	0.0609628	1.01651	0.972187	1.06286	0.935551
finn-pQTL-R10-v1-TNFRSF13C	ukb-saige-153	Colorectal cancer || id:ukb-saige-153	TNFRSF13C	Wald ratio	1	0.0279794	0.0394255	0.477904	-0.0492946	0.105253	1.02837	0.951901	1.11099	0.935551
finn-pQTL-R10-v1-TREH	ukb-saige-153	Colorectal cancer || id:ukb-saige-153	TREH	Wald ratio	1	0.0162117	0.0233043	0.486647	-0.0294647	0.0618881	1.01634	0.970965	1.06384	0.935551
finn-pQTL-R10-v1-DBH	ukb-saige-153	Colorectal cancer || id:ukb-saige-153	DBH	Inverse variance weighted	2	-0.0199679	0.0191599	0.297333	-0.0575213	0.0175855	0.98023	0.944102	1.01774	0.937811
finn-pQTL-R10-v1-DSG2	ukb-saige-153	Colorectal cancer || id:ukb-saige-153	DSG2	Inverse variance weighted	2	0.157051	0.152206	0.302153	-0.141274	0.455376	1.17006	0.868252	1.57677	0.937811
finn-pQTL-R10-v1-GPNMB	ukb-saige-153	Colorectal cancer || id:ukb-saige-153	GPNMB	Inverse variance weighted	2	0.0788253	0.0766457	0.303745	-0.0714004	0.229051	1.08202	0.931089	1.25741	0.937811
finn-pQTL-R10-v1-ITGBL1	ukb-saige-153	Colorectal cancer || id:ukb-saige-153	ITGBL1	Inverse variance weighted	2	0.0538848	0.0511294	0.291932	-0.0463287	0.154098	1.05536	0.954728	1.16661	0.937811
finn-pQTL-R10-v1-OGN	ukb-saige-153	Colorectal cancer || id:ukb-saige-153	OGN	Inverse variance weighted	3	0.0416959	0.0398536	0.295456	-0.0364171	0.119809	1.04258	0.964238	1.12728	0.937811
finn-pQTL-R10-v1-PVALB	ukb-saige-153	Colorectal cancer || id:ukb-saige-153	PVALB	Inverse variance weighted	2	0.0566802	0.0546317	0.299505	-0.050398	0.163758	1.05832	0.950851	1.17793	0.937811
finn-pQTL-R10-v1-ANXA2	ukb-saige-153	Colorectal cancer || id:ukb-saige-153	ANXA2	Wald ratio	1	0.0544197	0.0843505	0.518823	-0.110907	0.219747	1.05593	0.895022	1.24576	0.941369
finn-pQTL-R10-v1-APPL2	ukb-saige-153	Colorectal cancer || id:ukb-saige-153	APPL2	Wald ratio	1	-0.11343	0.175633	0.518387	-0.45767	0.230811	0.892767	0.632756	1.25962	0.941369
finn-pQTL-R10-v1-GBP1	ukb-saige-153	Colorectal cancer || id:ukb-saige-153	GBP1	Wald ratio	1	-0.0312641	0.0479867	0.514714	-0.125318	0.0627899	0.96922	0.882216	1.0648	0.941369
finn-pQTL-R10-v1-IDO1	ukb-saige-153	Colorectal cancer || id:ukb-saige-153	IDO1	Wald ratio	1	0.0689573	0.105734	0.514289	-0.138282	0.276197	1.07139	0.870853	1.31811	0.941369
finn-pQTL-R10-v1-LRRC37A2	ukb-saige-153	Colorectal cancer || id:ukb-saige-153	LRRC37A2	Wald ratio	1	0.0833011	0.128738	0.517594	-0.169026	0.335628	1.08687	0.844487	1.39882	0.941369
finn-pQTL-R10-v1-TBCA	ukb-saige-153	Colorectal cancer || id:ukb-saige-153	TBCA	Wald ratio	1	0.0415836	0.0637615	0.514289	-0.083389	0.166556	1.04246	0.919993	1.18123	0.941369
finn-pQTL-R10-v1-ABO	ukb-saige-153	Colorectal cancer || id:ukb-saige-153	ABO	Inverse variance weighted	3	0.0180703	0.0181337	0.319006	-0.0174718	0.0536124	1.01823	0.98268	1.05508	0.942337
finn-pQTL-R10-v1-CTSF	ukb-saige-153	Colorectal cancer || id:ukb-saige-153	CTSF	Inverse variance weighted	2	0.0840277	0.0884249	0.341974	-0.089285	0.25734	1.08766	0.914585	1.29349	0.942337
finn-pQTL-R10-v1-EGFLAM	ukb-saige-153	Colorectal cancer || id:ukb-saige-153	EGFLAM	Inverse variance weighted	2	0.0309972	0.0318891	0.331034	-0.0315053	0.0934998	1.03148	0.968986	1.09801	0.942337
finn-pQTL-R10-v1-ENTPD5	ukb-saige-153	Colorectal cancer || id:ukb-saige-153	ENTPD5	Inverse variance weighted	2	-0.0449777	0.0487245	0.355954	-0.140478	0.0505223	0.956019	0.868943	1.05182	0.942337
finn-pQTL-R10-v1-FLRT2	ukb-saige-153	Colorectal cancer || id:ukb-saige-153	FLRT2	Inverse variance weighted	4	0.0245971	0.026647	0.355969	-0.027631	0.0768253	1.0249	0.972747	1.07985	0.942337
finn-pQTL-R10-v1-FUT8	ukb-saige-153	Colorectal cancer || id:ukb-saige-153	FUT8	Inverse variance weighted	2	-0.0375203	0.0408721	0.358622	-0.11763	0.042589	0.963175	0.889025	1.04351	0.942337
finn-pQTL-R10-v1-GALNT5	ukb-saige-153	Colorectal cancer || id:ukb-saige-153	GALNT5	Inverse variance weighted	3	0.0421751	0.0446755	0.345153	-0.0453889	0.129739	1.04308	0.955626	1.13853	0.942337
finn-pQTL-R10-v1-KLK10	ukb-saige-153	Colorectal cancer || id:ukb-saige-153	KLK10	Inverse variance weighted	2	-0.027521	0.0298087	0.355875	-0.0859461	0.0309041	0.972854	0.917644	1.03139	0.942337
finn-pQTL-R10-v1-KLRD1	ukb-saige-153	Colorectal cancer || id:ukb-saige-153	KLRD1	Inverse variance weighted	2	0.041645	0.0415693	0.31643	-0.0398308	0.123121	1.04252	0.960952	1.13102	0.942337
finn-pQTL-R10-v1-MOCS2	ukb-saige-153	Colorectal cancer || id:ukb-saige-153	MOCS2	Inverse variance weighted	2	0.0520878	0.0558335	0.350865	-0.0573458	0.161521	1.05347	0.944267	1.1753	0.942337
finn-pQTL-R10-v1-PAMR1	ukb-saige-153	Colorectal cancer || id:ukb-saige-153	PAMR1	Inverse variance weighted	2	0.0656278	0.0648345	0.311425	-0.0614477	0.192703	1.06783	0.940402	1.21252	0.942337
finn-pQTL-R10-v1-PXN	ukb-saige-153	Colorectal cancer || id:ukb-saige-153	PXN	Inverse variance weighted	2	0.0291075	0.0316782	0.358174	-0.0329817	0.0911967	1.02954	0.967556	1.09548	0.942337
finn-pQTL-R10-v1-RELT	ukb-saige-153	Colorectal cancer || id:ukb-saige-153	RELT	Inverse variance weighted	2	0.0544241	0.0579848	0.34794	-0.0592261	0.168074	1.05593	0.942494	1.18302	0.942337
finn-pQTL-R10-v1-SFTPD	ukb-saige-153	Colorectal cancer || id:ukb-saige-153	SFTPD	Inverse variance weighted	2	0.0353845	0.0357838	0.322741	-0.0347518	0.105521	1.03602	0.965845	1.11129	0.942337
finn-pQTL-R10-v1-ACHE	ukb-saige-153	Colorectal cancer || id:ukb-saige-153	ACHE	Inverse variance weighted	2	-0.0606305	0.0886307	0.493924	-0.234347	0.113086	0.941171	0.791088	1.11973	0.946871
finn-pQTL-R10-v1-ADAM12	ukb-saige-153	Colorectal cancer || id:ukb-saige-153	ADAM12	Inverse variance weighted	2	-0.0488872	0.0764066	0.522284	-0.198644	0.10087	0.952289	0.819842	1.10613	0.946871
finn-pQTL-R10-v1-ADAM15	ukb-saige-153	Colorectal cancer || id:ukb-saige-153	ADAM15	Inverse variance weighted	3	-0.0200341	0.0278284	0.471577	-0.0745777	0.0345096	0.980165	0.928135	1.03511	0.946871
finn-pQTL-R10-v1-ADAMTS8	ukb-saige-153	Colorectal cancer || id:ukb-saige-153	ADAMTS8	Inverse variance weighted	3	-0.0170106	0.0404	0.673716	-0.0961946	0.0621735	0.983133	0.908287	1.06415	0.946871
finn-pQTL-R10-v1-ADGRD1	ukb-saige-153	Colorectal cancer || id:ukb-saige-153	ADGRD1	Inverse variance weighted	2	-0.0178501	0.0418978	0.670079	-0.0999697	0.0642695	0.982308	0.904865	1.06638	0.946871
finn-pQTL-R10-v1-ADGRE1	ukb-saige-153	Colorectal cancer || id:ukb-saige-153	ADGRE1	Inverse variance weighted	2	-0.0336951	0.0655499	0.607226	-0.162173	0.0947828	0.966866	0.850294	1.09942	0.946871
finn-pQTL-R10-v1-AHSG	ukb-saige-153	Colorectal cancer || id:ukb-saige-153	AHSG	Inverse variance weighted	2	-0.0139377	0.0242602	0.565622	-0.0614877	0.0336122	0.986159	0.940364	1.03418	0.946871
finn-pQTL-R10-v1-AMY2B	ukb-saige-153	Colorectal cancer || id:ukb-saige-153	AMY2B	Inverse variance weighted	2	0.0534699	0.0622985	0.390735	-0.0686351	0.175575	1.05493	0.933667	1.19193	0.946871
finn-pQTL-R10-v1-ANPEP	ukb-saige-153	Colorectal cancer || id:ukb-saige-153	ANPEP	Inverse variance weighted	2	0.0211596	0.0457228	0.643522	-0.068457	0.110776	1.02139	0.933834	1.11714	0.946871
finn-pQTL-R10-v1-ARHGEF5	ukb-saige-153	Colorectal cancer || id:ukb-saige-153	ARHGEF5	Inverse variance weighted	2	0.0320279	0.0413394	0.438485	-0.0489974	0.113053	1.03255	0.952184	1.11969	0.946871
finn-pQTL-R10-v1-ARSA	ukb-saige-153	Colorectal cancer || id:ukb-saige-153	ARSA	Inverse variance weighted	2	0.0549847	0.0715807	0.442398	-0.0853135	0.195283	1.05652	0.918224	1.21565	0.946871
finn-pQTL-R10-v1-ASAH2	ukb-saige-153	Colorectal cancer || id:ukb-saige-153	ASAH2	Inverse variance weighted	2	-0.028378	0.0359798	0.430276	-0.0988984	0.0421424	0.972021	0.905835	1.04304	0.946871
finn-pQTL-R10-v1-BTN2A1	ukb-saige-153	Colorectal cancer || id:ukb-saige-153	BTN2A1	Inverse variance weighted	2	-0.0446526	0.0797141	0.57537	-0.200892	0.111587	0.95633	0.818001	1.11805	0.946871
finn-pQTL-R10-v1-C1QTNF9	ukb-saige-153	Colorectal cancer || id:ukb-saige-153	C1QTNF9	Inverse variance weighted	2	0.0134523	0.0309354	0.66367	-0.0471811	0.0740858	1.01354	0.953915	1.0769	0.946871
finn-pQTL-R10-v1-CAPG	ukb-saige-153	Colorectal cancer || id:ukb-saige-153	CAPG	Inverse variance weighted	2	-0.00983932	0.0223476	0.65973	-0.0536406	0.033962	0.990209	0.947773	1.03455	0.946871
finn-pQTL-R10-v1-CST5	ukb-saige-153	Colorectal cancer || id:ukb-saige-153	CST5	Inverse variance weighted	3	-0.0226484	0.0382095	0.553354	-0.0975391	0.0522423	0.977606	0.907067	1.05363	0.946871
finn-pQTL-R10-v1-CSTB	ukb-saige-153	Colorectal cancer || id:ukb-saige-153	CSTB	Inverse variance weighted	2	-0.0342732	0.0411575	0.404995	-0.114942	0.0463954	0.966307	0.891418	1.04749	0.946871
finn-pQTL-R10-v1-CTSB	ukb-saige-153	Colorectal cancer || id:ukb-saige-153	CTSB	Inverse variance weighted	2	0.0250257	0.0334603	0.454508	-0.0405565	0.0906079	1.02534	0.960255	1.09484	0.946871
finn-pQTL-R10-v1-CTSC	ukb-saige-153	Colorectal cancer || id:ukb-saige-153	CTSC	Inverse variance weighted	3	0.0121371	0.0277658	0.662022	-0.0422839	0.066558	1.01221	0.958598	1.06882	0.946871
finn-pQTL-R10-v1-CTSD	ukb-saige-153	Colorectal cancer || id:ukb-saige-153	CTSD	Inverse variance weighted	2	-0.0482883	0.10651	0.650282	-0.257047	0.16047	0.952859	0.773332	1.17406	0.946871
finn-pQTL-R10-v1-CTSE	ukb-saige-153	Colorectal cancer || id:ukb-saige-153	CTSE	Inverse variance weighted	2	-0.0289608	0.0543102	0.593862	-0.135409	0.0774872	0.971455	0.873359	1.08057	0.946871
finn-pQTL-R10-v1-CYTL1	ukb-saige-153	Colorectal cancer || id:ukb-saige-153	CYTL1	Inverse variance weighted	2	0.0195805	0.0329106	0.551869	-0.0449242	0.0840853	1.01977	0.95607	1.08772	0.946871
finn-pQTL-R10-v1-EDAR	ukb-saige-153	Colorectal cancer || id:ukb-saige-153	EDAR	Inverse variance weighted	2	0.0246881	0.0386812	0.523314	-0.0511271	0.100503	1.025	0.950158	1.10573	0.946871
finn-pQTL-R10-v1-ENPP5	ukb-saige-153	Colorectal cancer || id:ukb-saige-153	ENPP5	Inverse variance weighted	2	0.0191369	0.0286473	0.504123	-0.0370118	0.0752855	1.01932	0.963665	1.07819	0.946871
finn-pQTL-R10-v1-ENPP6	ukb-saige-153	Colorectal cancer || id:ukb-saige-153	ENPP6	Inverse variance weighted	2	-0.0488142	0.0758065	0.51962	-0.197395	0.0997666	0.952358	0.820866	1.10491	0.946871
finn-pQTL-R10-v1-EPPK1	ukb-saige-153	Colorectal cancer || id:ukb-saige-153	EPPK1	Inverse variance weighted	3	-0.0300204	0.0498962	0.547402	-0.127817	0.0677761	0.970426	0.880015	1.07013	0.946871
finn-pQTL-R10-v1-FAM20A	ukb-saige-153	Colorectal cancer || id:ukb-saige-153	FAM20A	Inverse variance weighted	2	0.0254626	0.0449754	0.571295	-0.0626892	0.113614	1.02579	0.939235	1.12032	0.946871
finn-pQTL-R10-v1-FCAR	ukb-saige-153	Colorectal cancer || id:ukb-saige-153	FCAR	Inverse variance weighted	2	-0.0217054	0.0315285	0.491178	-0.0835013	0.0400905	0.978528	0.91989	1.0409	0.946871
finn-pQTL-R10-v1-FCGR2A	ukb-saige-153	Colorectal cancer || id:ukb-saige-153	FCGR2A	Inverse variance weighted	4	-0.0171527	0.0199835	0.390704	-0.0563204	0.022015	0.982994	0.945236	1.02226	0.946871
finn-pQTL-R10-v1-FCGR3B	ukb-saige-153	Colorectal cancer || id:ukb-saige-153	FCGR3B	Inverse variance weighted	3	0.0221753	0.0497937	0.656072	-0.0754205	0.119771	1.02242	0.927353	1.12724	0.946871
finn-pQTL-R10-v1-FCN2	ukb-saige-153	Colorectal cancer || id:ukb-saige-153	FCN2	Inverse variance weighted	3	-0.0209139	0.030351	0.49078	-0.0804019	0.038574	0.979303	0.922745	1.03933	0.946871
finn-pQTL-R10-v1-FCRL2	ukb-saige-153	Colorectal cancer || id:ukb-saige-153	FCRL2	Inverse variance weighted	2	0.0179758	0.0331202	0.587306	-0.0469397	0.0828913	1.01814	0.954145	1.08642	0.946871
finn-pQTL-R10-v1-FGFR4	ukb-saige-153	Colorectal cancer || id:ukb-saige-153	FGFR4	Inverse variance weighted	3	-0.018949	0.0214903	0.377912	-0.06107	0.0231719	0.981229	0.940757	1.02344	0.946871
finn-pQTL-R10-v1-GFRA1	ukb-saige-153	Colorectal cancer || id:ukb-saige-153	GFRA1	Inverse variance weighted	2	0.0234265	0.0558152	0.674694	-0.0859713	0.132824	1.0237	0.917621	1.14205	0.946871
finn-pQTL-R10-v1-GGH	ukb-saige-153	Colorectal cancer || id:ukb-saige-153	GGH	Inverse variance weighted	2	-0.0313673	0.0715512	0.661104	-0.171608	0.108873	0.96912	0.84231	1.11502	0.946871
finn-pQTL-R10-v1-GNLY	ukb-saige-153	Colorectal cancer || id:ukb-saige-153	GNLY	Inverse variance weighted	2	0.0183301	0.0339189	0.588915	-0.0481509	0.0848111	1.0185	0.95299	1.08851	0.946871
finn-pQTL-R10-v1-HCG22	ukb-saige-153	Colorectal cancer || id:ukb-saige-153	HCG22	Inverse variance weighted	3	-0.0422706	0.050845	0.405769	-0.141927	0.0573856	0.95861	0.867685	1.05906	0.946871
finn-pQTL-R10-v1-HPGDS	ukb-saige-153	Colorectal cancer || id:ukb-saige-153	HPGDS	Inverse variance weighted	2	-0.0282048	0.0504022	0.575756	-0.126993	0.0705835	0.972189	0.88074	1.07313	0.946871
finn-pQTL-R10-v1-HRG	ukb-saige-153	Colorectal cancer || id:ukb-saige-153	HRG	Inverse variance weighted	2	-0.0323946	0.0646224	0.616167	-0.159054	0.0942653	0.968125	0.85295	1.09885	0.946871
finn-pQTL-R10-v1-HSDL2	ukb-saige-153	Colorectal cancer || id:ukb-saige-153	HSDL2	Inverse variance weighted	4	0.0125645	0.0243375	0.605673	-0.035137	0.0602659	1.01264	0.965473	1.06212	0.946871
finn-pQTL-R10-v1-ICAM1	ukb-saige-153	Colorectal cancer || id:ukb-saige-153	ICAM1	Inverse variance weighted	2	0.0261514	0.0530913	0.622313	-0.0779075	0.13021	1.0265	0.92505	1.13907	0.946871
finn-pQTL-R10-v1-IGDCC4	ukb-saige-153	Colorectal cancer || id:ukb-saige-153	IGDCC4	Inverse variance weighted	2	-0.0366178	0.0730164	0.616019	-0.17973	0.106494	0.964045	0.835496	1.11237	0.946871
finn-pQTL-R10-v1-IGFBP3	ukb-saige-153	Colorectal cancer || id:ukb-saige-153	IGFBP3	Inverse variance weighted	3	0.0410919	0.0490315	0.401991	-0.0550099	0.137194	1.04195	0.946476	1.14705	0.946871
finn-pQTL-R10-v1-IL1RAP	ukb-saige-153	Colorectal cancer || id:ukb-saige-153	IL1RAP	Inverse variance weighted	2	0.0109512	0.0209543	0.601236	-0.0301192	0.0520216	1.01101	0.97033	1.0534	0.946871
finn-pQTL-R10-v1-IL1RL1	ukb-saige-153	Colorectal cancer || id:ukb-saige-153	IL1RL1	Inverse variance weighted	3	-0.0208749	0.0253354	0.409972	-0.0705322	0.0287824	0.979341	0.931898	1.0292	0.946871
finn-pQTL-R10-v1-IL1RL2	ukb-saige-153	Colorectal cancer || id:ukb-saige-153	IL1RL2	Inverse variance weighted	3	0.031175	0.0384044	0.416933	-0.0440977	0.106448	1.03167	0.95686	1.11232	0.946871
finn-pQTL-R10-v1-IL7R	ukb-saige-153	Colorectal cancer || id:ukb-saige-153	IL7R	Inverse variance weighted	2	-0.0133998	0.0319125	0.674566	-0.0759483	0.0491488	0.98669	0.926864	1.05038	0.946871
finn-pQTL-R10-v1-KEL	ukb-saige-153	Colorectal cancer || id:ukb-saige-153	KEL	Inverse variance weighted	2	0.0401381	0.0765857	0.600214	-0.10997	0.190246	1.04095	0.895861	1.20955	0.946871
finn-pQTL-R10-v1-KIR3DL1	ukb-saige-153	Colorectal cancer || id:ukb-saige-153	KIR3DL1	Inverse variance weighted	2	0.0245176	0.0387212	0.526614	-0.0513759	0.100411	1.02482	0.949922	1.10563	0.946871
finn-pQTL-R10-v1-LAIR2	ukb-saige-153	Colorectal cancer || id:ukb-saige-153	LAIR2	Inverse variance weighted	4	0.0145916	0.0324389	0.652842	-0.0489887	0.0781719	1.0147	0.952192	1.08131	0.946871
finn-pQTL-R10-v1-LBP	ukb-saige-153	Colorectal cancer || id:ukb-saige-153	LBP	Inverse variance weighted	3	-0.0190386	0.0305668	0.533381	-0.0789495	0.0408722	0.981141	0.924087	1.04172	0.946871
finn-pQTL-R10-v1-LCP1	ukb-saige-153	Colorectal cancer || id:ukb-saige-153	LCP1	Inverse variance weighted	2	0.0135709	0.031039	0.661952	-0.0472656	0.0744074	1.01366	0.953834	1.07725	0.946871
finn-pQTL-R10-v1-LECT2	ukb-saige-153	Colorectal cancer || id:ukb-saige-153	LECT2	Inverse variance weighted	2	-0.0180537	0.0304717	0.553532	-0.0777783	0.0416708	0.982108	0.92517	1.04255	0.946871
finn-pQTL-R10-v1-LGALS8	ukb-saige-153	Colorectal cancer || id:ukb-saige-153	LGALS8	Inverse variance weighted	2	0.057663	0.0722006	0.424493	-0.0838501	0.199176	1.05936	0.919569	1.2204	0.946871
finn-pQTL-R10-v1-LILRA6	ukb-saige-153	Colorectal cancer || id:ukb-saige-153	LILRA6	Inverse variance weighted	3	-0.0140171	0.0237688	0.555373	-0.060604	0.0325697	0.986081	0.941196	1.03311	0.946871
finn-pQTL-R10-v1-LILRB4	ukb-saige-153	Colorectal cancer || id:ukb-saige-153	LILRB4	Inverse variance weighted	2	0.0955207	0.119365	0.423571	-0.138434	0.329476	1.10023	0.87072	1.39024	0.946871
finn-pQTL-R10-v1-LILRB5	ukb-saige-153	Colorectal cancer || id:ukb-saige-153	LILRB5	Inverse variance weighted	2	-0.00908852	0.0192581	0.636975	-0.0468343	0.0286573	0.990953	0.954245	1.02907	0.946871
finn-pQTL-R10-v1-LTA	ukb-saige-153	Colorectal cancer || id:ukb-saige-153	LTA	Inverse variance weighted	2	0.0140869	0.0300885	0.639653	-0.0448865	0.0730603	1.01419	0.956106	1.0758	0.946871
finn-pQTL-R10-v1-LYPD8	ukb-saige-153	Colorectal cancer || id:ukb-saige-153	LYPD8	Inverse variance weighted	3	0.0199873	0.0434326	0.645379	-0.0651406	0.105115	1.02019	0.936936	1.11084	0.946871
finn-pQTL-R10-v1-MAN2B2	ukb-saige-153	Colorectal cancer || id:ukb-saige-153	MAN2B2	Inverse variance weighted	2	-0.0132057	0.0216964	0.542749	-0.0557306	0.0293192	0.986881	0.945794	1.02975	0.946871
finn-pQTL-R10-v1-MIA	ukb-saige-153	Colorectal cancer || id:ukb-saige-153	MIA	Inverse variance weighted	5	0.0194421	0.0263713	0.460975	-0.0322457	0.0711298	1.01963	0.968269	1.07372	0.946871
finn-pQTL-R10-v1-MST1	ukb-saige-153	Colorectal cancer || id:ukb-saige-153	MST1	Inverse variance weighted	2	0.0245805	0.0396267	0.535058	-0.0530878	0.102249	1.02489	0.948297	1.10766	0.946871
finn-pQTL-R10-v1-NAAA	ukb-saige-153	Colorectal cancer || id:ukb-saige-153	NAAA	Inverse variance weighted	2	0.0333946	0.0620943	0.590711	-0.0883101	0.155099	1.03396	0.915477	1.16777	0.946871
finn-pQTL-R10-v1-NCAM2	ukb-saige-153	Colorectal cancer || id:ukb-saige-153	NCAM2	Inverse variance weighted	3	-0.019455	0.0296858	0.512234	-0.0776392	0.0387292	0.980733	0.925298	1.03949	0.946871
finn-pQTL-R10-v1-NFASC	ukb-saige-153	Colorectal cancer || id:ukb-saige-153	NFASC	Inverse variance weighted	2	-0.0298517	0.0469284	0.524704	-0.121831	0.062128	0.970589	0.885298	1.0641	0.946871
finn-pQTL-R10-v1-OBP2B	ukb-saige-153	Colorectal cancer || id:ukb-saige-153	OBP2B	Inverse variance weighted	3	0.0246247	0.0276646	0.373403	-0.0295978	0.0788473	1.02493	0.970836	1.08204	0.946871
finn-pQTL-R10-v1-OLFM4	ukb-saige-153	Colorectal cancer || id:ukb-saige-153	OLFM4	Inverse variance weighted	3	-0.020626	0.0249935	0.409229	-0.0696133	0.0283614	0.979585	0.932754	1.02877	0.946871
finn-pQTL-R10-v1-OSMR	ukb-saige-153	Colorectal cancer || id:ukb-saige-153	OSMR	Inverse variance weighted	2	0.0253356	0.0410482	0.537092	-0.0551188	0.10579	1.02566	0.946373	1.11159	0.946871
finn-pQTL-R10-v1-PAM	ukb-saige-153	Colorectal cancer || id:ukb-saige-153	PAM	Inverse variance weighted	2	-0.0178061	0.0395905	0.652886	-0.0954034	0.0597913	0.982352	0.909006	1.06161	0.946871
finn-pQTL-R10-v1-PCDHB15	ukb-saige-153	Colorectal cancer || id:ukb-saige-153	PCDHB15	Inverse variance weighted	3	0.0341294	0.056689	0.547144	-0.0769811	0.14524	1.03472	0.925907	1.15632	0.946871
finn-pQTL-R10-v1-PCSK9	ukb-saige-153	Colorectal cancer || id:ukb-saige-153	PCSK9	Inverse variance weighted	4	-0.0538793	0.0682944	0.430155	-0.187736	0.0799777	0.947546	0.828833	1.08326	0.946871
finn-pQTL-R10-v1-PILRA	ukb-saige-153	Colorectal cancer || id:ukb-saige-153	PILRA	Inverse variance weighted	3	0.0225496	0.0276	0.41392	-0.0315464	0.0766455	1.02281	0.968946	1.07966	0.946871
finn-pQTL-R10-v1-PILRB	ukb-saige-153	Colorectal cancer || id:ukb-saige-153	PILRB	Inverse variance weighted	4	0.0104604	0.0183886	0.569458	-0.0255814	0.0465021	1.01052	0.974743	1.0476	0.946871
finn-pQTL-R10-v1-PLA2G15	ukb-saige-153	Colorectal cancer || id:ukb-saige-153	PLA2G15	Inverse variance weighted	2	-0.12215	0.135865	0.368622	-0.388446	0.144145	0.885015	0.67811	1.15505	0.946871
finn-pQTL-R10-v1-PLA2G2A	ukb-saige-153	Colorectal cancer || id:ukb-saige-153	PLA2G2A	Inverse variance weighted	5	0.0117362	0.0258143	0.64937	-0.0388599	0.0623323	1.01181	0.961885	1.06432	0.946871
finn-pQTL-R10-v1-PROK1	ukb-saige-153	Colorectal cancer || id:ukb-saige-153	PROK1	Inverse variance weighted	2	-0.054461	0.0751801	0.468816	-0.201814	0.092892	0.946995	0.817247	1.09734	0.946871
finn-pQTL-R10-v1-RARRES1	ukb-saige-153	Colorectal cancer || id:ukb-saige-153	RARRES1	Inverse variance weighted	3	-0.0301368	0.03719	0.417741	-0.103029	0.0427557	0.970313	0.902101	1.04368	0.946871
finn-pQTL-R10-v1-RNASE10	ukb-saige-153	Colorectal cancer || id:ukb-saige-153	RNASE10	Inverse variance weighted	4	0.0171309	0.0245657	0.485583	-0.0310179	0.0652798	1.01728	0.969458	1.06746	0.946871
finn-pQTL-R10-v1-SELPLG	ukb-saige-153	Colorectal cancer || id:ukb-saige-153	SELPLG	Inverse variance weighted	2	-0.019847	0.0409481	0.627898	-0.100105	0.0604113	0.980349	0.904742	1.06227	0.946871
finn-pQTL-R10-v1-SUSD2	ukb-saige-153	Colorectal cancer || id:ukb-saige-153	SUSD2	Inverse variance weighted	2	-0.0301629	0.0558003	0.588817	-0.139532	0.0792057	0.970287	0.869766	1.08243	0.946871
finn-pQTL-R10-v1-TP53I3	ukb-saige-153	Colorectal cancer || id:ukb-saige-153	TP53I3	Inverse variance weighted	2	0.0325692	0.048531	0.502156	-0.0625515	0.12769	1.03311	0.939365	1.1362	0.946871
finn-pQTL-R10-v1-TPSD1	ukb-saige-153	Colorectal cancer || id:ukb-saige-153	TPSD1	Inverse variance weighted	2	0.0349474	0.0555074	0.528957	-0.0738471	0.143742	1.03557	0.928814	1.15459	0.946871
finn-pQTL-R10-v1-MICALL2	ukb-saige-153	Colorectal cancer || id:ukb-saige-153	MICALL2	Wald ratio	1	-0.0620779	0.097551	0.524539	-0.253278	0.129122	0.93981	0.776252	1.13783	0.948482
finn-pQTL-R10-v1-C1QL2	ukb-saige-153	Colorectal cancer || id:ukb-saige-153	C1QL2	Wald ratio	1	0.0648882	0.109499	0.553454	-0.149729	0.279506	1.06704	0.860941	1.32248	0.956327
finn-pQTL-R10-v1-CA9	ukb-saige-153	Colorectal cancer || id:ukb-saige-153	CA9	Wald ratio	1	-0.0948191	0.152388	0.533796	-0.393499	0.203861	0.909537	0.674692	1.22613	0.956327
finn-pQTL-R10-v1-DAPK2	ukb-saige-153	Colorectal cancer || id:ukb-saige-153	DAPK2	Wald ratio	1	0.0602223	0.101915	0.554581	-0.13953	0.259975	1.06207	0.869767	1.2969	0.956327
finn-pQTL-R10-v1-DDT	ukb-saige-153	Colorectal cancer || id:ukb-saige-153	DDT	Wald ratio	1	0.0344748	0.058342	0.554581	-0.0798755	0.148825	1.03508	0.923231	1.16047	0.956327
finn-pQTL-R10-v1-F10	ukb-saige-153	Colorectal cancer || id:ukb-saige-153	F10	Wald ratio	1	-0.0330575	0.0550958	0.548506	-0.141045	0.0749303	0.967483	0.86845	1.07781	0.956327
finn-pQTL-R10-v1-FAM3D	ukb-saige-153	Colorectal cancer || id:ukb-saige-153	FAM3D	Wald ratio	1	0.0498289	0.0815382	0.541126	-0.109986	0.209644	1.05109	0.895847	1.23324	0.956327
finn-pQTL-R10-v1-FCER1A	ukb-saige-153	Colorectal cancer || id:ukb-saige-153	FCER1A	Wald ratio	1	-0.0604905	0.10319	0.557736	-0.262742	0.141761	0.941303	0.76894	1.1523	0.956327
finn-pQTL-R10-v1-FUCA1	ukb-saige-153	Colorectal cancer || id:ukb-saige-153	FUCA1	Wald ratio	1	0.0339227	0.0574077	0.554581	-0.0785963	0.146442	1.0345	0.924413	1.15771	0.956327
finn-pQTL-R10-v1-LAIR1	ukb-saige-153	Colorectal cancer || id:ukb-saige-153	LAIR1	Wald ratio	1	-0.0457252	0.0773811	0.554581	-0.197392	0.105942	0.955304	0.820869	1.11176	0.956327
finn-pQTL-R10-v1-MEGF10	ukb-saige-153	Colorectal cancer || id:ukb-saige-153	MEGF10	Wald ratio	1	-0.0347283	0.0573016	0.544475	-0.147039	0.0775829	0.965868	0.86326	1.08067	0.956327
finn-pQTL-R10-v1-OXT	ukb-saige-153	Colorectal cancer || id:ukb-saige-153	OXT	Wald ratio	1	-0.0231957	0.0386595	0.548506	-0.0989683	0.0525769	0.977071	0.905771	1.05398	0.956327
finn-pQTL-R10-v1-RNASE1	ukb-saige-153	Colorectal cancer || id:ukb-saige-153	RNASE1	Wald ratio	1	0.0506454	0.0868206	0.559669	-0.119523	0.220814	1.05195	0.887344	1.24709	0.956327
finn-pQTL-R10-v1-SCG3	ukb-saige-153	Colorectal cancer || id:ukb-saige-153	SCG3	Wald ratio	1	-0.0204388	0.035038	0.559669	-0.0891133	0.0482356	0.979769	0.914742	1.04942	0.956327
finn-pQTL-R10-v1-SERPINE2	ukb-saige-153	Colorectal cancer || id:ukb-saige-153	SERPINE2	Wald ratio	1	-0.0298038	0.0496731	0.548506	-0.127163	0.0675554	0.970636	0.88059	1.06989	0.956327
finn-pQTL-R10-v1-SPARCL1	ukb-saige-153	Colorectal cancer || id:ukb-saige-153	SPARCL1	Wald ratio	1	0.016062	0.0271818	0.554581	-0.0372143	0.0693382	1.01619	0.96347	1.0718	0.956327
finn-pQTL-R10-v1-SPINK2	ukb-saige-153	Colorectal cancer || id:ukb-saige-153	SPINK2	Wald ratio	1	0.0245091	0.0416085	0.555834	-0.0570435	0.106062	1.02481	0.944553	1.11189	0.956327
finn-pQTL-R10-v1-VNN2	ukb-saige-153	Colorectal cancer || id:ukb-saige-153	VNN2	Wald ratio	1	0.0200099	0.0328733	0.542726	-0.0444219	0.0844416	1.02021	0.95655	1.08811	0.956327
finn-pQTL-R10-v1-HJV	ukb-saige-153	Colorectal cancer || id:ukb-saige-153	HJV	Wald ratio	1	0.068042	0.117858	0.563724	-0.162961	0.299045	1.07041	0.849625	1.34857	0.957516
finn-pQTL-R10-v1-ICOSLG	ukb-saige-153	Colorectal cancer || id:ukb-saige-153	ICOSLG	Wald ratio	1	-0.0476623	0.0826147	0.563991	-0.209587	0.114262	0.953456	0.810919	1.12105	0.957516
finn-pQTL-R10-v1-FETUB	ukb-saige-153	Colorectal cancer || id:ukb-saige-153	FETUB	Wald ratio	1	-0.0325798	0.0571576	0.568678	-0.144609	0.079449	0.967945	0.865361	1.08269	0.959303
finn-pQTL-R10-v1-MMP3	ukb-saige-153	Colorectal cancer || id:ukb-saige-153	MMP3	Wald ratio	1	0.0197629	0.034585	0.567709	-0.0480238	0.0875496	1.01996	0.953111	1.0915	0.959303
finn-pQTL-R10-v1-DCC	ukb-saige-153	Colorectal cancer || id:ukb-saige-153	DCC	Wald ratio	1	-0.0269304	0.0476461	0.571926	-0.120317	0.0664559	0.973429	0.88664	1.06871	0.959928
finn-pQTL-R10-v1-KLRF1	ukb-saige-153	Colorectal cancer || id:ukb-saige-153	KLRF1	Wald ratio	1	0.0486605	0.0862618	0.572684	-0.120413	0.217734	1.04986	0.886555	1.24326	0.959928
finn-pQTL-R10-v1-AARSD1	ukb-saige-153	Colorectal cancer || id:ukb-saige-153	AARSD1	Wald ratio	1	0.624352	1.63292	0.7022	-2.57617	3.82487	1.86704	0.0760647	45.827	0.960911
finn-pQTL-R10-v1-ACYP1	ukb-saige-153	Colorectal cancer || id:ukb-saige-153	ACYP1	Wald ratio	1	-0.0330124	0.0666986	0.620636	-0.163742	0.0977168	0.967527	0.848961	1.10265	0.960911
finn-pQTL-R10-v1-ADH1B	ukb-saige-153	Colorectal cancer || id:ukb-saige-153	ADH1B	Wald ratio	1	0.0455647	0.103165	0.65873	-0.15664	0.247769	1.04662	0.855012	1.28116	0.960911
finn-pQTL-R10-v1-AGT	ukb-saige-153	Colorectal cancer || id:ukb-saige-153	AGT	Wald ratio	1	-0.0152973	0.0388317	0.693626	-0.0914075	0.0608128	0.984819	0.912646	1.0627	0.960911
finn-pQTL-R10-v1-AGXT	ukb-saige-153	Colorectal cancer || id:ukb-saige-153	AGXT	Wald ratio	1	-0.0371713	0.0712449	0.601852	-0.176811	0.102469	0.963511	0.837938	1.1079	0.960911
finn-pQTL-R10-v1-AIF1L	ukb-saige-153	Colorectal cancer || id:ukb-saige-153	AIF1L	Wald ratio	1	0.0383751	0.0708464	0.588048	-0.100484	0.177234	1.03912	0.9044	1.19391	0.960911
finn-pQTL-R10-v1-APOL1	ukb-saige-153	Colorectal cancer || id:ukb-saige-153	APOL1	Wald ratio	1	-0.0601679	0.116993	0.607052	-0.289474	0.169139	0.941606	0.748657	1.18428	0.960911
finn-pQTL-R10-v1-ATRAID	ukb-saige-153	Colorectal cancer || id:ukb-saige-153	ATRAID	Wald ratio	1	-0.0227861	0.0683583	0.738883	-0.156768	0.111196	0.977472	0.854902	1.11761	0.960911
finn-pQTL-R10-v1-B4GALT1	ukb-saige-153	Colorectal cancer || id:ukb-saige-153	B4GALT1	Wald ratio	1	0.0429201	0.0858403	0.617075	-0.125327	0.211167	1.04385	0.882209	1.23512	0.960911
finn-pQTL-R10-v1-CA13	ukb-saige-153	Colorectal cancer || id:ukb-saige-153	CA13	Wald ratio	1	-0.038933	0.0901606	0.665874	-0.215648	0.137782	0.961815	0.806019	1.14773	0.960911
finn-pQTL-R10-v1-CALCOCO1	ukb-saige-153	Colorectal cancer || id:ukb-saige-153	CALCOCO1	Wald ratio	1	-0.065597	0.13994	0.639248	-0.33988	0.208686	0.936508	0.711856	1.23206	0.960911
finn-pQTL-R10-v1-CST3	ukb-saige-153	Colorectal cancer || id:ukb-saige-153	CST3	Wald ratio	1	0.0276654	0.0653909	0.672239	-0.100501	0.155831	1.02805	0.904384	1.16863	0.960911
finn-pQTL-R10-v1-CST6	ukb-saige-153	Colorectal cancer || id:ukb-saige-153	CST6	Wald ratio	1	-0.0500959	0.100192	0.617075	-0.246472	0.14628	0.951138	0.781554	1.15752	0.960911
finn-pQTL-R10-v1-CTSV	ukb-saige-153	Colorectal cancer || id:ukb-saige-153	CTSV	Wald ratio	1	0.0293978	0.0858811	0.732119	-0.138929	0.197725	1.02983	0.87029	1.21863	0.960911
finn-pQTL-R10-v1-CTSZ	ukb-saige-153	Colorectal cancer || id:ukb-saige-153	CTSZ	Wald ratio	1	-0.0253413	0.0714754	0.72293	-0.165433	0.114751	0.974977	0.847526	1.12159	0.960911
finn-pQTL-R10-v1-CXCL16	ukb-saige-153	Colorectal cancer || id:ukb-saige-153	CXCL16	Wald ratio	1	-0.0393065	0.0851641	0.644412	-0.206228	0.127615	0.961456	0.813647	1.13612	0.960911
finn-pQTL-R10-v1-CXCL5	ukb-saige-153	Colorectal cancer || id:ukb-saige-153	CXCL5	Wald ratio	1	-0.022574	0.0555667	0.684559	-0.131485	0.0863368	0.977679	0.876793	1.09017	0.960911
finn-pQTL-R10-v1-ENTPD6	ukb-saige-153	Colorectal cancer || id:ukb-saige-153	ENTPD6	Wald ratio	1	-0.0142887	0.0300555	0.634495	-0.0731974	0.0446201	0.985813	0.929417	1.04563	0.960911
finn-pQTL-R10-v1-ERBB2	ukb-saige-153	Colorectal cancer || id:ukb-saige-153	ERBB2	Wald ratio	1	0.0471661	0.12937	0.715422	-0.206399	0.300731	1.0483	0.813509	1.35085	0.960911
finn-pQTL-R10-v1-F13B	ukb-saige-153	Colorectal cancer || id:ukb-saige-153	F13B	Wald ratio	1	0.0245087	0.0646139	0.704457	-0.102134	0.151152	1.02481	0.902908	1.16317	0.960911
finn-pQTL-R10-v1-F2R	ukb-saige-153	Colorectal cancer || id:ukb-saige-153	F2R	Wald ratio	1	-0.0376911	0.102371	0.712738	-0.238338	0.162956	0.96301	0.787936	1.17698	0.960911
finn-pQTL-R10-v1-FBN2	ukb-saige-153	Colorectal cancer || id:ukb-saige-153	FBN2	Wald ratio	1	0.0206217	0.0412433	0.617075	-0.0602153	0.101459	1.02084	0.941562	1.10678	0.960911
finn-pQTL-R10-v1-FGF2	ukb-saige-153	Colorectal cancer || id:ukb-saige-153	FGF2	Wald ratio	1	-0.0254287	0.0696263	0.714949	-0.161896	0.111039	0.974892	0.850529	1.11744	0.960911
finn-pQTL-R10-v1-FST	ukb-saige-153	Colorectal cancer || id:ukb-saige-153	FST	Wald ratio	1	-0.04524	0.105103	0.666879	-0.251242	0.160762	0.955768	0.777834	1.17441	0.960911
finn-pQTL-R10-v1-GALNT2	ukb-saige-153	Colorectal cancer || id:ukb-saige-153	GALNT2	Wald ratio	1	0.0309202	0.0618404	0.617075	-0.0902869	0.152127	1.0314	0.913669	1.16431	0.960911
finn-pQTL-R10-v1-GLIPR1	ukb-saige-153	Colorectal cancer || id:ukb-saige-153	GLIPR1	Wald ratio	1	0.0342711	0.0753964	0.649436	-0.113506	0.182048	1.03487	0.892699	1.19967	0.960911
finn-pQTL-R10-v1-GLT8D2	ukb-saige-153	Colorectal cancer || id:ukb-saige-153	GLT8D2	Wald ratio	1	0.0473321	0.0958474	0.621428	-0.140529	0.235193	1.04847	0.868899	1.26515	0.960911
finn-pQTL-R10-v1-GMPR	ukb-saige-153	Colorectal cancer || id:ukb-saige-153	GMPR	Wald ratio	1	0.0382096	0.0917032	0.676922	-0.141529	0.217948	1.03895	0.86803	1.24352	0.960911
finn-pQTL-R10-v1-GNAS	ukb-saige-153	Colorectal cancer || id:ukb-saige-153	GNAS	Wald ratio	1	0.0388006	0.0880014	0.659279	-0.133682	0.211283	1.03956	0.874868	1.23526	0.960911
finn-pQTL-R10-v1-GRHPR	ukb-saige-153	Colorectal cancer || id:ukb-saige-153	GRHPR	Wald ratio	1	0.0433165	0.0898818	0.629857	-0.132852	0.219485	1.04427	0.875595	1.24543	0.960911
finn-pQTL-R10-v1-GSTA1	ukb-saige-153	Colorectal cancer || id:ukb-saige-153	GSTA1	Wald ratio	1	-0.0281918	0.0738357	0.702596	-0.17291	0.116526	0.972202	0.841214	1.12359	0.960911
finn-pQTL-R10-v1-GSTA3	ukb-saige-153	Colorectal cancer || id:ukb-saige-153	GSTA3	Wald ratio	1	-0.0310264	0.0812597	0.702596	-0.190295	0.128243	0.96945	0.826715	1.13683	0.960911
finn-pQTL-R10-v1-HS1BP3	ukb-saige-153	Colorectal cancer || id:ukb-saige-153	HS1BP3	Wald ratio	1	-0.0363207	0.0877751	0.679026	-0.20836	0.135718	0.964331	0.811915	1.14536	0.960911
finn-pQTL-R10-v1-HSPB1	ukb-saige-153	Colorectal cancer || id:ukb-saige-153	HSPB1	Wald ratio	1	-0.0277625	0.0533895	0.603064	-0.132406	0.0768809	0.972619	0.875985	1.07991	0.960911
finn-pQTL-R10-v1-IGSF21	ukb-saige-153	Colorectal cancer || id:ukb-saige-153	IGSF21	Wald ratio	1	0.0553434	0.129135	0.668235	-0.19776	0.308447	1.0569	0.820566	1.36131	0.960911
finn-pQTL-R10-v1-IL12B	ukb-saige-153	Colorectal cancer || id:ukb-saige-153	IL12B	Wald ratio	1	0.0164593	0.0394338	0.676392	-0.0608309	0.0937496	1.0166	0.940982	1.09828	0.960911
finn-pQTL-R10-v1-IL20RB	ukb-saige-153	Colorectal cancer || id:ukb-saige-153	IL20RB	Wald ratio	1	0.0542382	0.108476	0.617075	-0.158376	0.266852	1.05574	0.853529	1.30585	0.960911
finn-pQTL-R10-v1-ITIH1	ukb-saige-153	Colorectal cancer || id:ukb-saige-153	ITIH1	Wald ratio	1	-0.0348156	0.0638286	0.585441	-0.15992	0.0902885	0.965783	0.852212	1.09449	0.960911
finn-pQTL-R10-v1-KIAA0319	ukb-saige-153	Colorectal cancer || id:ukb-saige-153	KIAA0319	Wald ratio	1	-0.0312773	0.0625546	0.617075	-0.153884	0.0913297	0.969207	0.857371	1.09563	0.960911
finn-pQTL-R10-v1-KLK1	ukb-saige-153	Colorectal cancer || id:ukb-saige-153	KLK1	Wald ratio	1	0.0354162	0.067881	0.601852	-0.0976307	0.168463	1.03605	0.906984	1.18348	0.960911
finn-pQTL-R10-v1-KLK11	ukb-saige-153	Colorectal cancer || id:ukb-saige-153	KLK11	Wald ratio	1	0.0196532	0.0487398	0.686782	-0.0758769	0.115183	1.01985	0.92693	1.12208	0.960911
finn-pQTL-R10-v1-KYNU	ukb-saige-153	Colorectal cancer || id:ukb-saige-153	KYNU	Wald ratio	1	-0.0543387	0.117734	0.644412	-0.285097	0.17642	0.947111	0.751941	1.19294	0.960911
finn-pQTL-R10-v1-LPL	ukb-saige-153	Colorectal cancer || id:ukb-saige-153	LPL	Wald ratio	1	0.0359774	0.0787005	0.647568	-0.118276	0.19023	1.03663	0.888451	1.20953	0.960911
finn-pQTL-R10-v1-LRPAP1	ukb-saige-153	Colorectal cancer || id:ukb-saige-153	LRPAP1	Wald ratio	1	0.0278204	0.0781619	0.721891	-0.125377	0.181018	1.02821	0.882164	1.19844	0.960911
finn-pQTL-R10-v1-LXN	ukb-saige-153	Colorectal cancer || id:ukb-saige-153	LXN	Wald ratio	1	0.0526335	0.115794	0.649436	-0.174322	0.279589	1.05404	0.840026	1.32259	0.960911
finn-pQTL-R10-v1-LYVE1	ukb-saige-153	Colorectal cancer || id:ukb-saige-153	LYVE1	Wald ratio	1	-0.0390518	0.0985594	0.691938	-0.232228	0.154125	0.961701	0.792765	1.16664	0.960911
finn-pQTL-R10-v1-MAMDC2	ukb-saige-153	Colorectal cancer || id:ukb-saige-153	MAMDC2	Wald ratio	1	-0.0437988	0.0808593	0.588048	-0.202283	0.114685	0.957147	0.816864	1.12152	0.960911
finn-pQTL-R10-v1-MAMDC4	ukb-saige-153	Colorectal cancer || id:ukb-saige-153	MAMDC4	Wald ratio	1	0.0365128	0.101932	0.720187	-0.163273	0.236299	1.03719	0.849359	1.26655	0.960911
finn-pQTL-R10-v1-MARCO	ukb-saige-153	Colorectal cancer || id:ukb-saige-153	MARCO	Wald ratio	1	-0.0321209	0.0669186	0.631227	-0.163281	0.0990396	0.968389	0.849352	1.10411	0.960911
finn-pQTL-R10-v1-MCAM	ukb-saige-153	Colorectal cancer || id:ukb-saige-153	MCAM	Wald ratio	1	-0.0357538	0.107261	0.738883	-0.245986	0.174478	0.964878	0.781933	1.19063	0.960911
finn-pQTL-R10-v1-MCFD2	ukb-saige-153	Colorectal cancer || id:ukb-saige-153	MCFD2	Wald ratio	1	0.0233163	0.0690854	0.73574	-0.112091	0.158724	1.02359	0.893963	1.17201	0.960911
finn-pQTL-R10-v1-MEP1A	ukb-saige-153	Colorectal cancer || id:ukb-saige-153	MEP1A	Wald ratio	1	0.156377	0.327886	0.633417	-0.48628	0.799033	1.16927	0.614909	2.22339	0.960911
finn-pQTL-R10-v1-MERTK	ukb-saige-153	Colorectal cancer || id:ukb-saige-153	MERTK	Wald ratio	1	-0.0221539	0.0641297	0.729753	-0.147848	0.10354	0.97809	0.862562	1.10909	0.960911
finn-pQTL-R10-v1-MUC13	ukb-saige-153	Colorectal cancer || id:ukb-saige-153	MUC13	Wald ratio	1	0.0361598	0.0970142	0.709351	-0.153988	0.226308	1.03682	0.857282	1.25396	0.960911
finn-pQTL-R10-v1-MYOC	ukb-saige-153	Colorectal cancer || id:ukb-saige-153	MYOC	Wald ratio	1	-0.0298349	0.0656368	0.649436	-0.158483	0.0988132	0.970606	0.853438	1.10386	0.960911
finn-pQTL-R10-v1-NECTIN4	ukb-saige-153	Colorectal cancer || id:ukb-saige-153	NECTIN4	Wald ratio	1	-0.0326958	0.079404	0.680512	-0.188328	0.122936	0.967833	0.828343	1.13081	0.960911
finn-pQTL-R10-v1-NID1	ukb-saige-153	Colorectal cancer || id:ukb-saige-153	NID1	Wald ratio	1	0.0586171	0.127004	0.644412	-0.19031	0.307544	1.06037	0.826703	1.36008	0.960911
finn-pQTL-R10-v1-NME3	ukb-saige-153	Colorectal cancer || id:ukb-saige-153	NME3	Wald ratio	1	-0.0353681	0.102814	0.730846	-0.236884	0.166148	0.96525	0.789083	1.18075	0.960911
finn-pQTL-R10-v1-NPTX2	ukb-saige-153	Colorectal cancer || id:ukb-saige-153	NPTX2	Wald ratio	1	-0.0332175	0.0664351	0.617075	-0.16343	0.0969952	0.967328	0.849226	1.10186	0.960911
finn-pQTL-R10-v1-OSCAR	ukb-saige-153	Colorectal cancer || id:ukb-saige-153	OSCAR	Wald ratio	1	0.0168935	0.0412515	0.682155	-0.0639595	0.0977465	1.01704	0.938043	1.10268	0.960911
finn-pQTL-R10-v1-PADI4	ukb-saige-153	Colorectal cancer || id:ukb-saige-153	PADI4	Wald ratio	1	-0.0343222	0.0878009	0.695864	-0.206412	0.137768	0.96626	0.813498	1.14771	0.960911
finn-pQTL-R10-v1-PARK7	ukb-saige-153	Colorectal cancer || id:ukb-saige-153	PARK7	Wald ratio	1	-0.0289199	0.0834802	0.729021	-0.192541	0.134701	0.971494	0.82486	1.14419	0.960911
finn-pQTL-R10-v1-PDE5A	ukb-saige-153	Colorectal cancer || id:ukb-saige-153	PDE5A	Wald ratio	1	0.037082	0.0916142	0.685653	-0.142482	0.216646	1.03778	0.867203	1.2419	0.960911
finn-pQTL-R10-v1-PGD	ukb-saige-153	Colorectal cancer || id:ukb-saige-153	PGD	Wald ratio	1	0.0350314	0.0674994	0.60377	-0.0972676	0.16733	1.03565	0.907313	1.18214	0.960911
finn-pQTL-R10-v1-PI16	ukb-saige-153	Colorectal cancer || id:ukb-saige-153	PI16	Wald ratio	1	-0.0246946	0.0652642	0.70515	-0.152613	0.103223	0.975608	0.858462	1.10874	0.960911
finn-pQTL-R10-v1-PIK3AP1	ukb-saige-153	Colorectal cancer || id:ukb-saige-153	PIK3AP1	Wald ratio	1	-0.0509141	0.0950396	0.592156	-0.237192	0.135364	0.95036	0.78884	1.14495	0.960911
finn-pQTL-R10-v1-PLXDC1	ukb-saige-153	Colorectal cancer || id:ukb-saige-153	PLXDC1	Wald ratio	1	0.0643927	0.124586	0.605258	-0.179796	0.308581	1.06651	0.835441	1.36149	0.960911
finn-pQTL-R10-v1-PODXL	ukb-saige-153	Colorectal cancer || id:ukb-saige-153	PODXL	Wald ratio	1	0.0312311	0.0773341	0.686326	-0.120344	0.182806	1.03172	0.886616	1.20058	0.960911
finn-pQTL-R10-v1-POSTN	ukb-saige-153	Colorectal cancer || id:ukb-saige-153	POSTN	Wald ratio	1	0.0280815	0.0802328	0.726339	-0.129175	0.185338	1.02848	0.87882	1.20362	0.960911
finn-pQTL-R10-v1-PRKG1	ukb-saige-153	Colorectal cancer || id:ukb-saige-153	PRKG1	Wald ratio	1	0.0396988	0.104471	0.703945	-0.165063	0.244461	1.0405	0.84784	1.27693	0.960911
finn-pQTL-R10-v1-PRSS22	ukb-saige-153	Colorectal cancer || id:ukb-saige-153	PRSS22	Wald ratio	1	0.0291213	0.0837237	0.727971	-0.134977	0.19322	1.02955	0.873736	1.21315	0.960911
finn-pQTL-R10-v1-PRSS27	ukb-saige-153	Colorectal cancer || id:ukb-saige-153	PRSS27	Wald ratio	1	-0.0611009	0.131849	0.643067	-0.319526	0.197324	0.940728	0.726494	1.21814	0.960911
finn-pQTL-R10-v1-PTH1R	ukb-saige-153	Colorectal cancer || id:ukb-saige-153	PTH1R	Wald ratio	1	-0.136805	0.259756	0.598425	-0.645927	0.372317	0.87214	0.524177	1.45109	0.960911
finn-pQTL-R10-v1-PXDNL	ukb-saige-153	Colorectal cancer || id:ukb-saige-153	PXDNL	Wald ratio	1	0.0238969	0.0477938	0.617075	-0.0697789	0.117573	1.02418	0.9326	1.12476	0.960911
finn-pQTL-R10-v1-RIDA	ukb-saige-153	Colorectal cancer || id:ukb-saige-153	RIDA	Wald ratio	1	-0.025871	0.0762863	0.734511	-0.175392	0.12365	0.974461	0.839128	1.13162	0.960911
finn-pQTL-R10-v1-RNASE4	ukb-saige-153	Colorectal cancer || id:ukb-saige-153	RNASE4	Wald ratio	1	-0.0205612	0.0497084	0.67914	-0.11799	0.0768673	0.979649	0.888705	1.0799	0.960911
finn-pQTL-R10-v1-SBSN	ukb-saige-153	Colorectal cancer || id:ukb-saige-153	SBSN	Wald ratio	1	0.0224904	0.0511146	0.659937	-0.0776942	0.122675	1.02275	0.925247	1.13052	0.960911
finn-pQTL-R10-v1-SEL1L	ukb-saige-153	Colorectal cancer || id:ukb-saige-153	SEL1L	Wald ratio	1	0.0215755	0.040454	0.593803	-0.0577143	0.100865	1.02181	0.94392	1.10613	0.960911
finn-pQTL-R10-v1-SIGLEC8	ukb-saige-153	Colorectal cancer || id:ukb-saige-153	SIGLEC8	Wald ratio	1	-0.319437	0.574987	0.578515	-1.44641	0.807537	0.726558	0.235414	2.24238	0.960911
finn-pQTL-R10-v1-SOD3	ukb-saige-153	Colorectal cancer || id:ukb-saige-153	SOD3	Wald ratio	1	-0.0284789	0.0626536	0.649436	-0.15128	0.0943222	0.971923	0.859607	1.09891	0.960911
finn-pQTL-R10-v1-SPINK5	ukb-saige-153	Colorectal cancer || id:ukb-saige-153	SPINK5	Wald ratio	1	-0.0189094	0.0483729	0.695864	-0.11372	0.0759015	0.981268	0.892508	1.07886	0.960911
finn-pQTL-R10-v1-SPON1	ukb-saige-153	Colorectal cancer || id:ukb-saige-153	SPON1	Wald ratio	1	0.0247671	0.0648661	0.702596	-0.102371	0.151905	1.02508	0.902695	1.16405	0.960911
finn-pQTL-R10-v1-SSC5D	ukb-saige-153	Colorectal cancer || id:ukb-saige-153	SSC5D	Wald ratio	1	-0.0132858	0.0398574	0.738883	-0.0914064	0.0648348	0.986802	0.912647	1.06698	0.960911
finn-pQTL-R10-v1-STX7	ukb-saige-153	Colorectal cancer || id:ukb-saige-153	STX7	Wald ratio	1	0.0124455	0.0325952	0.702596	-0.0514412	0.0763321	1.01252	0.949859	1.07932	0.960911
finn-pQTL-R10-v1-TF	ukb-saige-153	Colorectal cancer || id:ukb-saige-153	TF	Wald ratio	1	-0.0195763	0.0581998	0.736597	-0.133648	0.0944954	0.980614	0.874898	1.0991	0.960911
finn-pQTL-R10-v1-TFF1	ukb-saige-153	Colorectal cancer || id:ukb-saige-153	TFF1	Wald ratio	1	-0.0160694	0.0478257	0.736871	-0.109808	0.0776689	0.984059	0.896006	1.08076	0.960911
finn-pQTL-R10-v1-TGOLN2	ukb-saige-153	Colorectal cancer || id:ukb-saige-153	TGOLN2	Wald ratio	1	-0.0104572	0.0305002	0.731706	-0.0702377	0.0493233	0.989597	0.932172	1.05056	0.960911
finn-pQTL-R10-v1-THBS2	ukb-saige-153	Colorectal cancer || id:ukb-saige-153	THBS2	Wald ratio	1	-0.022549	0.0541177	0.676922	-0.12862	0.0835216	0.977703	0.879308	1.08711	0.960911
finn-pQTL-R10-v1-TPMT	ukb-saige-153	Colorectal cancer || id:ukb-saige-153	TPMT	Wald ratio	1	-0.0280284	0.0528228	0.595688	-0.131561	0.0755043	0.972361	0.876726	1.07843	0.960911
finn-pQTL-R10-v1-TYRO3	ukb-saige-153	Colorectal cancer || id:ukb-saige-153	TYRO3	Wald ratio	1	0.0202657	0.0388426	0.601852	-0.0558658	0.0963973	1.02047	0.945666	1.1012	0.960911
finn-pQTL-R10-v1-VASN	ukb-saige-153	Colorectal cancer || id:ukb-saige-153	VASN	Wald ratio	1	0.0183085	0.0514925	0.722173	-0.0826169	0.119234	1.01848	0.920704	1.12663	0.960911
finn-pQTL-R10-v1-ADGRB3	ukb-saige-153	Colorectal cancer || id:ukb-saige-153	ADGRB3	Inverse variance weighted	4	0.00788269	0.0216601	0.715912	-0.034571	0.0503364	1.00791	0.96602	1.05162	0.962104
finn-pQTL-R10-v1-BTD	ukb-saige-153	Colorectal cancer || id:ukb-saige-153	BTD	Inverse variance weighted (multiplicative random effects)	3	-0.0182525	0.0490953	0.710058	-0.114479	0.0779742	0.981913	0.89183	1.08109	0.962104
finn-pQTL-R10-v1-CDH6	ukb-saige-153	Colorectal cancer || id:ukb-saige-153	CDH6	Inverse variance weighted	3	-0.0173032	0.0473344	0.714699	-0.110079	0.0754722	0.982846	0.895764	1.07839	0.962104
finn-pQTL-R10-v1-CST1	ukb-saige-153	Colorectal cancer || id:ukb-saige-153	CST1	Inverse variance weighted	2	0.0115817	0.0329245	0.725013	-0.0529502	0.0761137	1.01165	0.948427	1.07909	0.962104
finn-pQTL-R10-v1-CST7	ukb-saige-153	Colorectal cancer || id:ukb-saige-153	CST7	Inverse variance weighted	2	0.0136791	0.0393914	0.728395	-0.063528	0.0908863	1.01377	0.938448	1.09514	0.962104
finn-pQTL-R10-v1-FGL1	ukb-saige-153	Colorectal cancer || id:ukb-saige-153	FGL1	Inverse variance weighted	5	0.0101775	0.0267573	0.703676	-0.0422668	0.0626217	1.01023	0.958614	1.06462	0.962104
finn-pQTL-R10-v1-GM2A	ukb-saige-153	Colorectal cancer || id:ukb-saige-153	GM2A	Inverse variance weighted	2	0.0105906	0.0284663	0.709864	-0.0452034	0.0663846	1.01065	0.955803	1.06864	0.962104
finn-pQTL-R10-v1-IGFBPL1	ukb-saige-153	Colorectal cancer || id:ukb-saige-153	IGFBPL1	Inverse variance weighted	2	-0.0165191	0.0447468	0.712003	-0.104223	0.0711847	0.983617	0.901025	1.07378	0.962104
finn-pQTL-R10-v1-LRRN1	ukb-saige-153	Colorectal cancer || id:ukb-saige-153	LRRN1	Inverse variance weighted	2	0.00989438	0.0280269	0.724065	-0.0450384	0.0648272	1.00994	0.955961	1.06697	0.962104
finn-pQTL-R10-v1-PRTG	ukb-saige-153	Colorectal cancer || id:ukb-saige-153	PRTG	Inverse variance weighted	3	0.019578	0.0542226	0.718049	-0.0866982	0.125854	1.01977	0.916954	1.13412	0.962104
finn-pQTL-R10-v1-SERPINA4	ukb-saige-153	Colorectal cancer || id:ukb-saige-153	SERPINA4	Inverse variance weighted	2	0.0178752	0.0460983	0.698192	-0.0724775	0.108228	1.01804	0.930087	1.1143	0.962104
finn-pQTL-R10-v1-SERPINB8	ukb-saige-153	Colorectal cancer || id:ukb-saige-153	SERPINB8	Inverse variance weighted	2	0.014134	0.0413787	0.732669	-0.0669682	0.0952363	1.01423	0.935225	1.09992	0.962602
finn-pQTL-R10-v1-ABHD14B	ukb-saige-153	Colorectal cancer || id:ukb-saige-153	ABHD14B	Wald ratio	1	0.024935	0.0831165	0.764177	-0.137973	0.187843	1.02525	0.871122	1.20664	0.962951
finn-pQTL-R10-v1-ARHGEF10	ukb-saige-153	Colorectal cancer || id:ukb-saige-153	ARHGEF10	Wald ratio	1	0.0335139	0.114342	0.769443	-0.190596	0.257623	1.03408	0.826467	1.29385	0.962951
finn-pQTL-R10-v1-BCHE	ukb-saige-153	Colorectal cancer || id:ukb-saige-153	BCHE	Wald ratio	1	-0.0134377	0.0410597	0.743462	-0.0939148	0.0670393	0.986652	0.91036	1.06934	0.962951
finn-pQTL-R10-v1-DPP4	ukb-saige-153	Colorectal cancer || id:ukb-saige-153	DPP4	Wald ratio	1	-0.0238631	0.0795436	0.764177	-0.179768	0.132042	0.976419	0.835464	1.14116	0.962951
finn-pQTL-R10-v1-HDDC2	ukb-saige-153	Colorectal cancer || id:ukb-saige-153	HDDC2	Wald ratio	1	0.0115818	0.0395475	0.769631	-0.0659313	0.0890948	1.01165	0.936195	1.09318	0.962951
finn-pQTL-R10-v1-LILRA5	ukb-saige-153	Colorectal cancer || id:ukb-saige-153	LILRA5	Wald ratio	1	-0.0185623	0.058484	0.750947	-0.133191	0.0960663	0.981609	0.875298	1.10083	0.962951
finn-pQTL-R10-v1-LSP1	ukb-saige-153	Colorectal cancer || id:ukb-saige-153	LSP1	Wald ratio	1	-0.0331282	0.10718	0.757252	-0.2432	0.176944	0.967414	0.784115	1.19356	0.962951
finn-pQTL-R10-v1-PTPRS	ukb-saige-153	Colorectal cancer || id:ukb-saige-153	PTPRS	Wald ratio	1	0.0258973	0.0807388	0.748396	-0.132351	0.184145	1.02624	0.876034	1.20219	0.962951
finn-pQTL-R10-v1-PTS	ukb-saige-153	Colorectal cancer || id:ukb-saige-153	PTS	Wald ratio	1	0.0254913	0.0796602	0.748968	-0.130643	0.181625	1.02582	0.877531	1.19916	0.962951
finn-pQTL-R10-v1-SCN4B	ukb-saige-153	Colorectal cancer || id:ukb-saige-153	SCN4B	Wald ratio	1	-0.00992897	0.0316576	0.753797	-0.0719779	0.0521199	0.99012	0.930552	1.0535	0.962951
finn-pQTL-R10-v1-SHMT1	ukb-saige-153	Colorectal cancer || id:ukb-saige-153	SHMT1	Wald ratio	1	0.0146259	0.0487529	0.764177	-0.0809299	0.110182	1.01473	0.922258	1.11648	0.962951
finn-pQTL-R10-v1-SPINK6	ukb-saige-153	Colorectal cancer || id:ukb-saige-153	SPINK6	Wald ratio	1	-0.0150051	0.0492353	0.760547	-0.111506	0.0814962	0.985107	0.894486	1.08491	0.962951
finn-pQTL-R10-v1-SPRR3	ukb-saige-153	Colorectal cancer || id:ukb-saige-153	SPRR3	Wald ratio	1	0.0151873	0.0514408	0.767812	-0.0856367	0.116011	1.0153	0.917928	1.12301	0.962951
finn-pQTL-R10-v1-TCN2	ukb-saige-153	Colorectal cancer || id:ukb-saige-153	TCN2	Wald ratio	1	-0.0104664	0.0348881	0.764177	-0.078847	0.0579142	0.989588	0.924181	1.05962	0.962951
finn-pQTL-R10-v1-TIMP3	ukb-saige-153	Colorectal cancer || id:ukb-saige-153	TIMP3	Wald ratio	1	-0.0196599	0.0604921	0.745181	-0.138224	0.0989046	0.980532	0.870903	1.10396	0.962951
finn-pQTL-R10-v1-TIMP4	ukb-saige-153	Colorectal cancer || id:ukb-saige-153	TIMP4	Wald ratio	1	0.0149573	0.0475914	0.753304	-0.0783218	0.108236	1.01507	0.924667	1.11431	0.962951
finn-pQTL-R10-v1-KIRREL2	ukb-saige-153	Colorectal cancer || id:ukb-saige-153	KIRREL2	Wald ratio	1	-0.0269037	0.0926684	0.771569	-0.208534	0.154726	0.973455	0.811774	1.16734	0.963094
finn-pQTL-R10-v1-PLTP	ukb-saige-153	Colorectal cancer || id:ukb-saige-153	PLTP	Wald ratio	1	0.0159143	0.0558035	0.775502	-0.0934605	0.125289	1.01604	0.910774	1.13348	0.96572
finn-pQTL-R10-v1-CA12	ukb-saige-153	Colorectal cancer || id:ukb-saige-153	CA12	Wald ratio	1	0.0217619	0.0784857	0.781571	-0.13207	0.175594	1.022	0.87628	1.19195	0.967647
finn-pQTL-R10-v1-MANSC4	ukb-saige-153	Colorectal cancer || id:ukb-saige-153	MANSC4	Wald ratio	1	0.00862698	0.0312572	0.782548	-0.0526371	0.0698911	1.00866	0.948724	1.07239	0.967647
finn-pQTL-R10-v1-MEGF9	ukb-saige-153	Colorectal cancer || id:ukb-saige-153	MEGF9	Wald ratio	1	0.0174571	0.0627366	0.780812	-0.105507	0.140421	1.01761	0.899868	1.15076	0.967647
finn-pQTL-R10-v1-HYAL1	ukb-saige-153	Colorectal cancer || id:ukb-saige-153	HYAL1	Wald ratio	1	-0.018161	0.0665902	0.785063	-0.148678	0.112356	0.982003	0.861847	1.11891	0.968489
finn-pQTL-R10-v1-ACP6	ukb-saige-153	Colorectal cancer || id:ukb-saige-153	ACP6	Inverse variance weighted	2	-0.00991225	0.0456646	0.828157	-0.0994148	0.0795903	0.990137	0.905367	1.08284	0.969725
finn-pQTL-R10-v1-APOD	ukb-saige-153	Colorectal cancer || id:ukb-saige-153	APOD	Inverse variance weighted	2	0.0224653	0.0761934	0.768111	-0.126874	0.171804	1.02272	0.880845	1.18745	0.969725
finn-pQTL-R10-v1-ATRN	ukb-saige-153	Colorectal cancer || id:ukb-saige-153	ATRN	Inverse variance weighted	2	0.0134326	0.0412278	0.744564	-0.0673738	0.0942391	1.01352	0.934846	1.09882	0.969725
finn-pQTL-R10-v1-BTN3A2	ukb-saige-153	Colorectal cancer || id:ukb-saige-153	BTN3A2	Inverse variance weighted	2	-0.00631846	0.027831	0.820401	-0.0608673	0.0482304	0.993701	0.940948	1.04941	0.969725
finn-pQTL-R10-v1-DPP7	ukb-saige-153	Colorectal cancer || id:ukb-saige-153	DPP7	Inverse variance weighted	4	-0.0124237	0.0566286	0.826347	-0.123416	0.0985683	0.987653	0.883896	1.10359	0.969725
finn-pQTL-R10-v1-ENPP7	ukb-saige-153	Colorectal cancer || id:ukb-saige-153	ENPP7	Inverse variance weighted	2	-0.00524104	0.0226317	0.816864	-0.0495991	0.039117	0.994773	0.951611	1.03989	0.969725
finn-pQTL-R10-v1-FCGR2B	ukb-saige-153	Colorectal cancer || id:ukb-saige-153	FCGR2B	Inverse variance weighted	2	-0.0176636	0.0722451	0.806847	-0.159264	0.123937	0.982491	0.852771	1.13194	0.969725
finn-pQTL-R10-v1-FCRLB	ukb-saige-153	Colorectal cancer || id:ukb-saige-153	FCRLB	Inverse variance weighted	5	0.00834023	0.028315	0.768336	-0.0471571	0.0638376	1.00838	0.953937	1.06592	0.969725
finn-pQTL-R10-v1-FRZB	ukb-saige-153	Colorectal cancer || id:ukb-saige-153	FRZB	Inverse variance weighted	2	-0.0155445	0.06386	0.807683	-0.14071	0.109621	0.984576	0.868741	1.11586	0.969725
finn-pQTL-R10-v1-GFRA2	ukb-saige-153	Colorectal cancer || id:ukb-saige-153	GFRA2	Inverse variance weighted	2	-0.0313675	0.110787	0.777076	-0.248511	0.185776	0.969119	0.779961	1.20415	0.969725
finn-pQTL-R10-v1-HGFAC	ukb-saige-153	Colorectal cancer || id:ukb-saige-153	HGFAC	Inverse variance weighted	3	-0.0159918	0.0663595	0.809565	-0.146056	0.114073	0.984135	0.864109	1.12083	0.969725
finn-pQTL-R10-v1-HMCN2	ukb-saige-153	Colorectal cancer || id:ukb-saige-153	HMCN2	Inverse variance weighted	4	0.010754	0.0333794	0.74732	-0.0546696	0.0761776	1.01081	0.946798	1.07915	0.969725
finn-pQTL-R10-v1-IL17RB	ukb-saige-153	Colorectal cancer || id:ukb-saige-153	IL17RB	Inverse variance weighted	3	-0.0129037	0.0568613	0.820475	-0.124352	0.0985444	0.987179	0.883069	1.10356	0.969725
finn-pQTL-R10-v1-ITPA	ukb-saige-153	Colorectal cancer || id:ukb-saige-153	ITPA	Inverse variance weighted	2	-0.00957581	0.03756	0.798764	-0.0831934	0.0640418	0.99047	0.920173	1.06614	0.969725
finn-pQTL-R10-v1-KLKB1	ukb-saige-153	Colorectal cancer || id:ukb-saige-153	KLKB1	Inverse variance weighted	2	0.0117256	0.0457594	0.797761	-0.0779628	0.101414	1.01179	0.924999	1.10673	0.969725
finn-pQTL-R10-v1-LAYN	ukb-saige-153	Colorectal cancer || id:ukb-saige-153	LAYN	Inverse variance weighted	3	0.0148919	0.060554	0.805739	-0.103794	0.133578	1.015	0.901411	1.14291	0.969725
finn-pQTL-R10-v1-NCAM1	ukb-saige-153	Colorectal cancer || id:ukb-saige-153	NCAM1	Inverse variance weighted	2	-0.0147841	0.0568454	0.794806	-0.126201	0.096633	0.985325	0.881438	1.10146	0.969725
finn-pQTL-R10-v1-PDGFRB	ukb-saige-153	Colorectal cancer || id:ukb-saige-153	PDGFRB	Inverse variance weighted	4	-0.00496151	0.0193675	0.797814	-0.0429219	0.0329989	0.995051	0.957986	1.03355	0.969725
finn-pQTL-R10-v1-PRAP1	ukb-saige-153	Colorectal cancer || id:ukb-saige-153	PRAP1	Inverse variance weighted	3	0.00952066	0.0421116	0.821138	-0.0730181	0.0920594	1.00957	0.929584	1.09643	0.969725
finn-pQTL-R10-v1-PVR	ukb-saige-153	Colorectal cancer || id:ukb-saige-153	PVR	Inverse variance weighted	2	-0.00937948	0.0308649	0.761213	-0.0698747	0.0511158	0.990664	0.932511	1.05244	0.969725
finn-pQTL-R10-v1-RAB44	ukb-saige-153	Colorectal cancer || id:ukb-saige-153	RAB44	Inverse variance weighted	2	-0.0287433	0.132599	0.828389	-0.288637	0.231151	0.971666	0.749284	1.26005	0.969725
finn-pQTL-R10-v1-REG1B	ukb-saige-153	Colorectal cancer || id:ukb-saige-153	REG1B	Inverse variance weighted	2	-0.0118935	0.0490676	0.808477	-0.108066	0.084279	0.988177	0.897568	1.08793	0.969725
finn-pQTL-R10-v1-UMOD	ukb-saige-153	Colorectal cancer || id:ukb-saige-153	UMOD	Inverse variance weighted	2	0.00738978	0.0262507	0.778321	-0.0440616	0.0588412	1.00742	0.956895	1.06061	0.969725
finn-pQTL-R10-v1-FAP	ukb-saige-153	Colorectal cancer || id:ukb-saige-153	FAP	Wald ratio	1	-0.0284551	0.107933	0.79206	-0.240004	0.183094	0.971946	0.786625	1.20093	0.972576
finn-pQTL-R10-v1-SGSH	ukb-saige-153	Colorectal cancer || id:ukb-saige-153	SGSH	Wald ratio	1	-0.0071032	0.0267826	0.790842	-0.059597	0.0453906	0.992922	0.942144	1.04644	0.972576
finn-pQTL-R10-v1-ACVRL1	ukb-saige-153	Colorectal cancer || id:ukb-saige-153	ACVRL1	Wald ratio	1	0.0135845	0.0575865	0.813512	-0.099285	0.126454	1.01368	0.905485	1.1348	0.972762
finn-pQTL-R10-v1-ANGPTL4	ukb-saige-153	Colorectal cancer || id:ukb-saige-153	ANGPTL4	Wald ratio	1	-0.01885	0.0772542	0.807231	-0.170268	0.132568	0.981327	0.843439	1.14176	0.972762
finn-pQTL-R10-v1-BTN1A1	ukb-saige-153	Colorectal cancer || id:ukb-saige-153	BTN1A1	Wald ratio	1	0.022073	0.0938104	0.81398	-0.161795	0.205942	1.02232	0.850615	1.22868	0.972762
finn-pQTL-R10-v1-ENDOU	ukb-saige-153	Colorectal cancer || id:ukb-saige-153	ENDOU	Wald ratio	1	0.0142839	0.0619869	0.817754	-0.10721	0.135778	1.01439	0.898337	1.14543	0.972762
finn-pQTL-R10-v1-F2	ukb-saige-153	Colorectal cancer || id:ukb-saige-153	F2	Wald ratio	1	-0.0229653	0.0893096	0.797068	-0.198012	0.152082	0.977296	0.82036	1.16426	0.972762
finn-pQTL-R10-v1-FN1	ukb-saige-153	Colorectal cancer || id:ukb-saige-153	FN1	Wald ratio	1	0.0233347	0.101824	0.818739	-0.176241	0.22291	1.02361	0.838416	1.24971	0.972762
finn-pQTL-R10-v1-GBP4	ukb-saige-153	Colorectal cancer || id:ukb-saige-153	GBP4	Wald ratio	1	0.0111751	0.0442787	0.800747	-0.0756111	0.0979613	1.01124	0.927177	1.10292	0.972762
finn-pQTL-R10-v1-HAVCR2	ukb-saige-153	Colorectal cancer || id:ukb-saige-153	HAVCR2	Wald ratio	1	0.0247441	0.100523	0.805563	-0.17228	0.221769	1.02505	0.841743	1.24828	0.972762
finn-pQTL-R10-v1-IL17D	ukb-saige-153	Colorectal cancer || id:ukb-saige-153	IL17D	Wald ratio	1	0.0128875	0.0546082	0.813433	-0.0941445	0.11992	1.01297	0.910151	1.12741	0.972762
finn-pQTL-R10-v1-IL6R	ukb-saige-153	Colorectal cancer || id:ukb-saige-153	IL6R	Wald ratio	1	0.00454068	0.0184991	0.806104	-0.0317175	0.0407988	1.00455	0.96878	1.04164	0.972762
finn-pQTL-R10-v1-KLK8	ukb-saige-153	Colorectal cancer || id:ukb-saige-153	KLK8	Wald ratio	1	-0.0083032	0.0392515	0.832467	-0.0852362	0.0686297	0.991731	0.918295	1.07104	0.972762
finn-pQTL-R10-v1-LRG1	ukb-saige-153	Colorectal cancer || id:ukb-saige-153	LRG1	Wald ratio	1	-0.019633	0.0872579	0.821979	-0.190659	0.151393	0.980558	0.826415	1.16345	0.972762
finn-pQTL-R10-v1-MMP10	ukb-saige-153	Colorectal cancer || id:ukb-saige-153	MMP10	Wald ratio	1	0.0134869	0.0583761	0.817288	-0.10093	0.127904	1.01358	0.903996	1.13644	0.972762
finn-pQTL-R10-v1-NTRK3	ukb-saige-153	Colorectal cancer || id:ukb-saige-153	NTRK3	Wald ratio	1	0.0196964	0.088491	0.823862	-0.153746	0.193139	1.01989	0.85749	1.21305	0.972762
finn-pQTL-R10-v1-PDCD5	ukb-saige-153	Colorectal cancer || id:ukb-saige-153	PDCD5	Wald ratio	1	-0.0133039	0.0611979	0.827903	-0.133252	0.106644	0.986784	0.875245	1.11254	0.972762
finn-pQTL-R10-v1-PIGR	ukb-saige-153	Colorectal cancer || id:ukb-saige-153	PIGR	Wald ratio	1	-0.0246871	0.114723	0.829619	-0.249543	0.200169	0.975615	0.779157	1.22161	0.972762
finn-pQTL-R10-v1-PRND	ukb-saige-153	Colorectal cancer || id:ukb-saige-153	PRND	Wald ratio	1	0.0132706	0.0612489	0.828468	-0.106777	0.133318	1.01336	0.898726	1.14261	0.972762
finn-pQTL-R10-v1-RETN	ukb-saige-153	Colorectal cancer || id:ukb-saige-153	RETN	Wald ratio	1	0.0169303	0.0688498	0.805758	-0.118015	0.151876	1.01707	0.888682	1.16402	0.972762
finn-pQTL-R10-v1-RGMB	ukb-saige-153	Colorectal cancer || id:ukb-saige-153	RGMB	Wald ratio	1	-0.0197824	0.0903109	0.826613	-0.196792	0.157227	0.980412	0.821362	1.17026	0.972762
finn-pQTL-R10-v1-SELP	ukb-saige-153	Colorectal cancer || id:ukb-saige-153	SELP	Wald ratio	1	0.0124731	0.0573088	0.827704	-0.0998522	0.124798	1.01255	0.904971	1.13292	0.972762
finn-pQTL-R10-v1-TNFRSF10A	ukb-saige-153	Colorectal cancer || id:ukb-saige-153	TNFRSF10A	Wald ratio	1	0.00885838	0.0422786	0.834039	-0.0740077	0.0917245	1.0089	0.928665	1.09606	0.972762
finn-pQTL-R10-v1-VAV3	ukb-saige-153	Colorectal cancer || id:ukb-saige-153	VAV3	Wald ratio	1	0.0203665	0.0975296	0.834586	-0.170792	0.211525	1.02058	0.842997	1.23556	0.972762
finn-pQTL-R10-v1-WASHC3	ukb-saige-153	Colorectal cancer || id:ukb-saige-153	WASHC3	Wald ratio	1	-0.0141804	0.0567215	0.802587	-0.125355	0.0969938	0.98592	0.882184	1.10185	0.972762
finn-pQTL-R10-v1-DLL1	ukb-saige-153	Colorectal cancer || id:ukb-saige-153	DLL1	Wald ratio	1	0.0213948	0.104597	0.837927	-0.183615	0.226405	1.02163	0.832256	1.25408	0.974506
finn-pQTL-R10-v1-ADA2	ukb-saige-153	Colorectal cancer || id:ukb-saige-153	ADA2	Wald ratio	1	-0.0154715	0.0810412	0.848597	-0.174312	0.143369	0.984648	0.840035	1.15416	0.976164
finn-pQTL-R10-v1-GIPC3	ukb-saige-153	Colorectal cancer || id:ukb-saige-153	GIPC3	Wald ratio	1	-0.0154477	0.0783914	0.843782	-0.169095	0.138199	0.984671	0.844429	1.1482	0.976164
finn-pQTL-R10-v1-HSPG2	ukb-saige-153	Colorectal cancer || id:ukb-saige-153	HSPG2	Wald ratio	1	0.0201999	0.100999	0.841481	-0.177759	0.218159	1.02041	0.837144	1.24378	0.976164
finn-pQTL-R10-v1-NINJ1	ukb-saige-153	Colorectal cancer || id:ukb-saige-153	NINJ1	Wald ratio	1	0.0166135	0.0849995	0.845037	-0.149986	0.183213	1.01675	0.86072	1.20107	0.976164
finn-pQTL-R10-v1-TFRC	ukb-saige-153	Colorectal cancer || id:ukb-saige-153	TFRC	Wald ratio	1	0.0101523	0.0531785	0.848597	-0.0940776	0.114382	1.0102	0.910212	1.12118	0.976164
finn-pQTL-R10-v1-BPIFB2	ukb-saige-153	Colorectal cancer || id:ukb-saige-153	BPIFB2	Inverse variance weighted	2	-0.0100427	0.0550522	0.855253	-0.117945	0.0978597	0.990008	0.888745	1.10281	0.977004
finn-pQTL-R10-v1-C7	ukb-saige-153	Colorectal cancer || id:ukb-saige-153	C7	Inverse variance weighted	2	-0.00939228	0.0531197	0.859655	-0.113507	0.0947223	0.990652	0.892698	1.09935	0.977004
finn-pQTL-R10-v1-CTBS	ukb-saige-153	Colorectal cancer || id:ukb-saige-153	CTBS	Inverse variance weighted	4	-0.00577561	0.0307502	0.851015	-0.066046	0.0544948	0.994241	0.936088	1.05601	0.977004
finn-pQTL-R10-v1-ICAM5	ukb-saige-153	Colorectal cancer || id:ukb-saige-153	ICAM5	Inverse variance weighted	2	-0.00851413	0.0482434	0.859915	-0.103071	0.0860429	0.991522	0.902063	1.08985	0.977004
finn-pQTL-R10-v1-IL2RA	ukb-saige-153	Colorectal cancer || id:ukb-saige-153	IL2RA	Inverse variance weighted	2	-0.0057186	0.0349981	0.870206	-0.0743149	0.0628777	0.994298	0.928379	1.0649	0.977004
finn-pQTL-R10-v1-ITGA2	ukb-saige-153	Colorectal cancer || id:ukb-saige-153	ITGA2	Inverse variance weighted	2	-0.0150321	0.0761156	0.843444	-0.164219	0.134154	0.98508	0.848556	1.14357	0.977004
finn-pQTL-R10-v1-MSMB	ukb-saige-153	Colorectal cancer || id:ukb-saige-153	MSMB	Inverse variance weighted	2	0.0040622	0.0210293	0.846827	-0.0371552	0.0452796	1.00407	0.963527	1.04632	0.977004
finn-pQTL-R10-v1-PTPRH	ukb-saige-153	Colorectal cancer || id:ukb-saige-153	PTPRH	Inverse variance weighted	2	0.00467602	0.0283158	0.868835	-0.0508229	0.060175	1.00469	0.950447	1.06202	0.977004
finn-pQTL-R10-v1-ULBP2	ukb-saige-153	Colorectal cancer || id:ukb-saige-153	ULBP2	Inverse variance weighted	3	-0.00622026	0.0365115	0.864724	-0.0777828	0.0653423	0.993799	0.925165	1.06752	0.977004
finn-pQTL-R10-v1-BST2	ukb-saige-153	Colorectal cancer || id:ukb-saige-153	BST2	Wald ratio	1	0.0221474	0.119526	0.852998	-0.212123	0.256417	1.02239	0.808865	1.29229	0.97781
finn-pQTL-R10-v1-C1QA	ukb-saige-153	Colorectal cancer || id:ukb-saige-153	C1QA	Wald ratio	1	-0.0101073	0.0600975	0.86644	-0.127898	0.107684	0.989944	0.879943	1.1137	0.97781
finn-pQTL-R10-v1-GSN	ukb-saige-153	Colorectal cancer || id:ukb-saige-153	GSN	Wald ratio	1	-0.0404311	0.238911	0.865615	-0.508697	0.427835	0.960375	0.601278	1.53393	0.97781
finn-pQTL-R10-v1-GSTT2B	ukb-saige-153	Colorectal cancer || id:ukb-saige-153	GSTT2B	Wald ratio	1	-0.0138987	0.0790486	0.860432	-0.168834	0.141037	0.986197	0.844649	1.15147	0.97781
finn-pQTL-R10-v1-MATN2	ukb-saige-153	Colorectal cancer || id:ukb-saige-153	MATN2	Wald ratio	1	-0.0124216	0.0714244	0.861934	-0.152413	0.12757	0.987655	0.858633	1.13606	0.97781
finn-pQTL-R10-v1-PRTFDC1	ukb-saige-153	Colorectal cancer || id:ukb-saige-153	PRTFDC1	Wald ratio	1	-0.0189112	0.107164	0.859924	-0.228952	0.191129	0.981266	0.795367	1.21062	0.97781
finn-pQTL-R10-v1-SLURP1	ukb-saige-153	Colorectal cancer || id:ukb-saige-153	SLURP1	Wald ratio	1	0.00919348	0.0536286	0.863887	-0.0959186	0.114306	1.00924	0.908538	1.12109	0.97781
finn-pQTL-R10-v1-XCL1	ukb-saige-153	Colorectal cancer || id:ukb-saige-153	XCL1	Wald ratio	1	0.00549746	0.0327508	0.866696	-0.0586941	0.069689	1.00551	0.942995	1.07217	0.97781
finn-pQTL-R10-v1-ZP3	ukb-saige-153	Colorectal cancer || id:ukb-saige-153	ZP3	Wald ratio	1	-0.00331721	0.0193504	0.863887	-0.041244	0.0346095	0.996688	0.959595	1.03522	0.97781
finn-pQTL-R10-v1-VSNL1	ukb-saige-153	Colorectal cancer || id:ukb-saige-153	VSNL1	Wald ratio	1	0.00982862	0.059489	0.868773	-0.10677	0.126427	1.00988	0.898732	1.13477	0.978064
finn-pQTL-R10-v1-PIK3IP1	ukb-saige-153	Colorectal cancer || id:ukb-saige-153	PIK3IP1	Wald ratio	1	-0.00874991	0.0562494	0.876383	-0.118999	0.101499	0.991288	0.887809	1.10683	0.984533
finn-pQTL-R10-v1-ABO	ukb-saige-153	Colorectal cancer || id:ukb-saige-153	ABO	Weighted median	3	0.016622	0.0184469	0.367549	-0.0195339	0.0527779	1.01676	0.980656	1.0542	0.985944
finn-pQTL-R10-v1-ADAM15	ukb-saige-153	Colorectal cancer || id:ukb-saige-153	ADAM15	Weighted median	3	-0.0230041	0.0284734	0.419138	-0.0788119	0.0328037	0.977258	0.924214	1.03335	0.985944
finn-pQTL-R10-v1-ADAM23	ukb-saige-153	Colorectal cancer || id:ukb-saige-153	ADAM23	Weighted median	4	-0.00175158	0.0338411	0.958721	-0.0680802	0.064577	0.99825	0.934186	1.06671	0.985944
finn-pQTL-R10-v1-ADAMTS8	ukb-saige-153	Colorectal cancer || id:ukb-saige-153	ADAMTS8	Weighted median	3	-0.0115345	0.0440899	0.793621	-0.0979507	0.0748818	0.988532	0.906694	1.07776	0.985944
finn-pQTL-R10-v1-ADGRB3	ukb-saige-153	Colorectal cancer || id:ukb-saige-153	ADGRB3	Weighted median	4	0.0109643	0.021748	0.614155	-0.0316618	0.0535903	1.01102	0.968834	1.05505	0.985944
finn-pQTL-R10-v1-BST1	ukb-saige-153	Colorectal cancer || id:ukb-saige-153	BST1	Weighted median	4	0.0260798	0.0207179	0.208101	-0.0145273	0.0666868	1.02642	0.985578	1.06896	0.985944
finn-pQTL-R10-v1-BTD	ukb-saige-153	Colorectal cancer || id:ukb-saige-153	BTD	Weighted median	3	-0.00328605	0.0305179	0.914253	-0.0631012	0.0565291	0.996719	0.938848	1.05816	0.985944
finn-pQTL-R10-v1-CDH6	ukb-saige-153	Colorectal cancer || id:ukb-saige-153	CDH6	Weighted median	3	0.000603303	0.0342446	0.985944	-0.066516	0.0677226	1.0006	0.935648	1.07007	0.985944
finn-pQTL-R10-v1-CST5	ukb-saige-153	Colorectal cancer || id:ukb-saige-153	CST5	Weighted median	3	-0.0325236	0.0270658	0.229499	-0.0855725	0.0205253	0.968	0.917987	1.02074	0.985944
finn-pQTL-R10-v1-CTBS	ukb-saige-153	Colorectal cancer || id:ukb-saige-153	CTBS	Weighted median	4	-0.00589749	0.0320747	0.854117	-0.0687638	0.0569689	0.99412	0.933547	1.05862	0.985944
finn-pQTL-R10-v1-CTSC	ukb-saige-153	Colorectal cancer || id:ukb-saige-153	CTSC	Weighted median	3	0.0126138	0.0280101	0.652474	-0.0422861	0.0675136	1.01269	0.958595	1.06984	0.985944
finn-pQTL-R10-v1-CTSH	ukb-saige-153	Colorectal cancer || id:ukb-saige-153	CTSH	Weighted median	4	-0.00117709	0.0246732	0.96195	-0.0495365	0.0471823	0.998824	0.95167	1.04831	0.985944
finn-pQTL-R10-v1-DPP7	ukb-saige-153	Colorectal cancer || id:ukb-saige-153	DPP7	Weighted median	4	-0.0123745	0.0655389	0.850241	-0.140831	0.116082	0.987702	0.868636	1.12309	0.985944
finn-pQTL-R10-v1-ENTPD2	ukb-saige-153	Colorectal cancer || id:ukb-saige-153	ENTPD2	Weighted median	3	0.00477599	0.0352879	0.89234	-0.0643882	0.0739402	1.00479	0.937641	1.07674	0.985944
finn-pQTL-R10-v1-EPPK1	ukb-saige-153	Colorectal cancer || id:ukb-saige-153	EPPK1	Weighted median	3	-0.0421317	0.0453422	0.352789	-0.131002	0.046739	0.958744	0.877216	1.04785	0.985944
finn-pQTL-R10-v1-FCGR2A	ukb-saige-153	Colorectal cancer || id:ukb-saige-153	FCGR2A	Weighted median	4	-0.0142902	0.0209651	0.49548	-0.0553818	0.0268014	0.985811	0.946124	1.02716	0.985944
finn-pQTL-R10-v1-FCGR3B	ukb-saige-153	Colorectal cancer || id:ukb-saige-153	FCGR3B	Weighted median	3	0.0087735	0.0306311	0.774553	-0.0512635	0.0688105	1.00881	0.950028	1.07123	0.985944
finn-pQTL-R10-v1-FCN2	ukb-saige-153	Colorectal cancer || id:ukb-saige-153	FCN2	Weighted median	3	-0.0282967	0.0328099	0.388444	-0.0926041	0.0360108	0.9721	0.911554	1.03667	0.985944
finn-pQTL-R10-v1-FCRLB	ukb-saige-153	Colorectal cancer || id:ukb-saige-153	FCRLB	Weighted median	5	0.00781608	0.0295859	0.79164	-0.0501724	0.0658045	1.00785	0.951065	1.06802	0.985944
finn-pQTL-R10-v1-FGFR4	ukb-saige-153	Colorectal cancer || id:ukb-saige-153	FGFR4	Weighted median	3	-0.0178478	0.0223911	0.425396	-0.0617344	0.0260388	0.982311	0.940133	1.02638	0.985944
finn-pQTL-R10-v1-FGL1	ukb-saige-153	Colorectal cancer || id:ukb-saige-153	FGL1	Weighted median	5	0.000921651	0.0263482	0.972096	-0.0507208	0.0525641	1.00092	0.950544	1.05397	0.985944
finn-pQTL-R10-v1-FLRT2	ukb-saige-153	Colorectal cancer || id:ukb-saige-153	FLRT2	Weighted median	4	0.0200054	0.0278724	0.472911	-0.0346245	0.0746354	1.02021	0.965968	1.07749	0.985944
finn-pQTL-R10-v1-GALNT5	ukb-saige-153	Colorectal cancer || id:ukb-saige-153	GALNT5	Weighted median	3	0.0395431	0.0468341	0.39849	-0.0522518	0.131338	1.04034	0.94909	1.14035	0.985944
finn-pQTL-R10-v1-GASK1A	ukb-saige-153	Colorectal cancer || id:ukb-saige-153	GASK1A	Weighted median	3	-0.0389526	0.0281102	0.165834	-0.0940486	0.0161433	0.961796	0.910239	1.01627	0.985944
finn-pQTL-R10-v1-HCG22	ukb-saige-153	Colorectal cancer || id:ukb-saige-153	HCG22	Weighted median	3	-0.040951	0.0318645	0.198736	-0.103406	0.0215035	0.959876	0.901761	1.02174	0.985944
finn-pQTL-R10-v1-HGFAC	ukb-saige-153	Colorectal cancer || id:ukb-saige-153	HGFAC	Weighted median	3	-0.0219473	0.0505053	0.663885	-0.120938	0.077043	0.978292	0.886089	1.08009	0.985944
finn-pQTL-R10-v1-HMCN2	ukb-saige-153	Colorectal cancer || id:ukb-saige-153	HMCN2	Weighted median	4	-0.0100163	0.0303257	0.741179	-0.0694547	0.049422	0.990034	0.932902	1.05066	0.985944
finn-pQTL-R10-v1-HS6ST1	ukb-saige-153	Colorectal cancer || id:ukb-saige-153	HS6ST1	Weighted median	3	-0.00504445	0.0424565	0.905422	-0.0882592	0.0781703	0.994968	0.915524	1.08131	0.985944
finn-pQTL-R10-v1-HSD17B14	ukb-saige-153	Colorectal cancer || id:ukb-saige-153	HSD17B14	Weighted median	3	-0.0367109	0.0312226	0.239683	-0.0979073	0.0244855	0.963955	0.906733	1.02479	0.985944
finn-pQTL-R10-v1-HSDL2	ukb-saige-153	Colorectal cancer || id:ukb-saige-153	HSDL2	Weighted median	4	0.0128193	0.0221141	0.562124	-0.0305243	0.0561629	1.0129	0.969937	1.05777	0.985944
finn-pQTL-R10-v1-IGFBP3	ukb-saige-153	Colorectal cancer || id:ukb-saige-153	IGFBP3	Weighted median	3	0.0409276	0.0411474	0.319902	-0.0397212	0.121576	1.04178	0.961057	1.12928	0.985944
finn-pQTL-R10-v1-IL17RA	ukb-saige-153	Colorectal cancer || id:ukb-saige-153	IL17RA	Weighted median	3	-0.00339702	0.0227356	0.881227	-0.0479587	0.0411647	0.996609	0.953173	1.04202	0.985944
finn-pQTL-R10-v1-IL17RB	ukb-saige-153	Colorectal cancer || id:ukb-saige-153	IL17RB	Weighted median	3	-0.00657104	0.0355972	0.853547	-0.0763415	0.0631995	0.993451	0.9265	1.06524	0.985944
finn-pQTL-R10-v1-IL1RL1	ukb-saige-153	Colorectal cancer || id:ukb-saige-153	IL1RL1	Weighted median	3	-0.0116706	0.0260463	0.654103	-0.0627214	0.0393803	0.988397	0.939205	1.04017	0.985944
finn-pQTL-R10-v1-IL1RL2	ukb-saige-153	Colorectal cancer || id:ukb-saige-153	IL1RL2	Weighted median	3	0.0176047	0.0408508	0.666504	-0.0624629	0.0976724	1.01776	0.939448	1.1026	0.985944
finn-pQTL-R10-v1-KAZALD1	ukb-saige-153	Colorectal cancer || id:ukb-saige-153	KAZALD1	Weighted median	3	0.0154179	0.106968	0.885393	-0.194239	0.225074	1.01554	0.823461	1.25242	0.985944
finn-pQTL-R10-v1-KLB	ukb-saige-153	Colorectal cancer || id:ukb-saige-153	KLB	Weighted median	3	0.000509844	0.0274138	0.985162	-0.0532212	0.0542409	1.00051	0.94817	1.05574	0.985944
finn-pQTL-R10-v1-KLK15	ukb-saige-153	Colorectal cancer || id:ukb-saige-153	KLK15	Weighted median	4	-0.00261999	0.025681	0.91874	-0.0529547	0.0477147	0.997383	0.948423	1.04887	0.985944
finn-pQTL-R10-v1-LAIR2	ukb-saige-153	Colorectal cancer || id:ukb-saige-153	LAIR2	Weighted median	4	0.00575457	0.0276652	0.835223	-0.0484692	0.0599783	1.00577	0.952687	1.06181	0.985944
finn-pQTL-R10-v1-LAYN	ukb-saige-153	Colorectal cancer || id:ukb-saige-153	LAYN	Weighted median	3	-0.00771792	0.0739236	0.916849	-0.152608	0.137172	0.992312	0.858466	1.14703	0.985944
finn-pQTL-R10-v1-LBP	ukb-saige-153	Colorectal cancer || id:ukb-saige-153	LBP	Weighted median	3	-0.015075	0.0311377	0.628285	-0.0761049	0.0459548	0.985038	0.926719	1.04703	0.985944
finn-pQTL-R10-v1-LILRA6	ukb-saige-153	Colorectal cancer || id:ukb-saige-153	LILRA6	Weighted median	3	-0.0139823	0.0247874	0.572693	-0.0625656	0.0346009	0.986115	0.939351	1.03521	0.985944
finn-pQTL-R10-v1-LPA	ukb-saige-153	Colorectal cancer || id:ukb-saige-153	LPA	Weighted median	3	0.0158056	0.0423108	0.708732	-0.0671236	0.0987349	1.01593	0.93508	1.10377	0.985944
finn-pQTL-R10-v1-LY75	ukb-saige-153	Colorectal cancer || id:ukb-saige-153	LY75	Weighted median	4	-0.0270438	0.0217885	0.214533	-0.0697492	0.0156617	0.973319	0.932628	1.01578	0.985944
finn-pQTL-R10-v1-LYPD8	ukb-saige-153	Colorectal cancer || id:ukb-saige-153	LYPD8	Weighted median	3	0.0203299	0.0466029	0.662666	-0.0710118	0.111672	1.02054	0.931451	1.11815	0.985944
finn-pQTL-R10-v1-MBL2	ukb-saige-153	Colorectal cancer || id:ukb-saige-153	MBL2	Weighted median	3	-0.0240944	0.0210683	0.252776	-0.0653882	0.0171994	0.976194	0.936704	1.01735	0.985944
finn-pQTL-R10-v1-MDGA1	ukb-saige-153	Colorectal cancer || id:ukb-saige-153	MDGA1	Weighted median	3	-0.00346796	0.018172	0.84865	-0.039085	0.0321491	0.996538	0.961669	1.03267	0.985944
finn-pQTL-R10-v1-MIA	ukb-saige-153	Colorectal cancer || id:ukb-saige-153	MIA	Weighted median	5	0.0293446	0.0283468	0.300575	-0.0262151	0.0849043	1.02978	0.974126	1.08861	0.985944
finn-pQTL-R10-v1-MILR1	ukb-saige-153	Colorectal cancer || id:ukb-saige-153	MILR1	Weighted median	3	0.0778463	0.0635021	0.220242	-0.0466178	0.20231	1.08096	0.954452	1.22423	0.985944
finn-pQTL-R10-v1-NCAM2	ukb-saige-153	Colorectal cancer || id:ukb-saige-153	NCAM2	Weighted median	3	-0.00989816	0.0315303	0.753578	-0.0716976	0.0519013	0.990151	0.930812	1.05327	0.985944
finn-pQTL-R10-v1-NELL1	ukb-saige-153	Colorectal cancer || id:ukb-saige-153	NELL1	Weighted median	3	-0.0443431	0.0490293	0.365772	-0.14044	0.0517543	0.956626	0.868975	1.05312	0.985944
finn-pQTL-R10-v1-OBP2B	ukb-saige-153	Colorectal cancer || id:ukb-saige-153	OBP2B	Weighted median	3	0.0237525	0.0287711	0.40905	-0.0326389	0.0801439	1.02404	0.967888	1.08344	0.985944
finn-pQTL-R10-v1-OGN	ukb-saige-153	Colorectal cancer || id:ukb-saige-153	OGN	Weighted median	3	0.0268526	0.0291926	0.357655	-0.0303649	0.0840701	1.02722	0.970091	1.08771	0.985944
finn-pQTL-R10-v1-OLFM4	ukb-saige-153	Colorectal cancer || id:ukb-saige-153	OLFM4	Weighted median	3	-0.0196612	0.0253234	0.43751	-0.0692951	0.0299727	0.980531	0.933051	1.03043	0.985944
finn-pQTL-R10-v1-PCDHB15	ukb-saige-153	Colorectal cancer || id:ukb-saige-153	PCDHB15	Weighted median	3	0.0300204	0.0455668	0.51001	-0.0592906	0.119331	1.03048	0.942433	1.12674	0.985944
finn-pQTL-R10-v1-PCSK9	ukb-saige-153	Colorectal cancer || id:ukb-saige-153	PCSK9	Weighted median	4	-0.038377	0.0532056	0.470727	-0.14266	0.065906	0.96235	0.867049	1.06813	0.985944
finn-pQTL-R10-v1-PDGFRB	ukb-saige-153	Colorectal cancer || id:ukb-saige-153	PDGFRB	Weighted median	4	0.0019881	0.0176239	0.910183	-0.0325547	0.0365309	1.00199	0.96797	1.03721	0.985944
finn-pQTL-R10-v1-PILRA	ukb-saige-153	Colorectal cancer || id:ukb-saige-153	PILRA	Weighted median	3	0.018066	0.0227567	0.427266	-0.026537	0.0626691	1.01823	0.973812	1.06467	0.985944
finn-pQTL-R10-v1-PILRB	ukb-saige-153	Colorectal cancer || id:ukb-saige-153	PILRB	Weighted median	4	0.0113812	0.0189926	0.54901	-0.0258442	0.0486066	1.01145	0.974487	1.04981	0.985944
finn-pQTL-R10-v1-PLA2G2A	ukb-saige-153	Colorectal cancer || id:ukb-saige-153	PLA2G2A	Weighted median	5	0.019481	0.0275646	0.479728	-0.0345457	0.0735077	1.01967	0.966044	1.07628	0.985944
finn-pQTL-R10-v1-PLB1	ukb-saige-153	Colorectal cancer || id:ukb-saige-153	PLB1	Weighted median	3	-0.0733374	0.0716075	0.305761	-0.213688	0.0670133	0.929287	0.8076	1.06931	0.985944
finn-pQTL-R10-v1-PM20D1	ukb-saige-153	Colorectal cancer || id:ukb-saige-153	PM20D1	Weighted median	3	-0.0169322	0.0556986	0.76113	-0.126101	0.092237	0.98321	0.881525	1.09662	0.985944
finn-pQTL-R10-v1-PRAP1	ukb-saige-153	Colorectal cancer || id:ukb-saige-153	PRAP1	Weighted median	3	-0.00206851	0.0462233	0.964306	-0.0926662	0.0885291	0.997934	0.911498	1.09257	0.985944
finn-pQTL-R10-v1-PRTG	ukb-saige-153	Colorectal cancer || id:ukb-saige-153	PRTG	Weighted median	3	0.0157818	0.0443445	0.721922	-0.0711334	0.102697	1.01591	0.931338	1.10816	0.985944
finn-pQTL-R10-v1-QPCT	ukb-saige-153	Colorectal cancer || id:ukb-saige-153	QPCT	Weighted median	4	0.0023728	0.0564371	0.966464	-0.108244	0.11299	1.00238	0.897409	1.11962	0.985944
finn-pQTL-R10-v1-RARRES1	ukb-saige-153	Colorectal cancer || id:ukb-saige-153	RARRES1	Weighted median	3	-0.0300897	0.0379181	0.427461	-0.104409	0.0442298	0.970358	0.900857	1.04522	0.985944
finn-pQTL-R10-v1-RNASE10	ukb-saige-153	Colorectal cancer || id:ukb-saige-153	RNASE10	Weighted median	4	0.0226342	0.0263153	0.389726	-0.0289439	0.0742122	1.02289	0.971471	1.07704	0.985944
finn-pQTL-R10-v1-ULBP2	ukb-saige-153	Colorectal cancer || id:ukb-saige-153	ULBP2	Weighted median	3	-0.00681047	0.0373826	0.855439	-0.0800803	0.0664594	0.993213	0.923042	1.06872	0.985944
finn-pQTL-R10-v1-BLMH	ukb-saige-153	Colorectal cancer || id:ukb-saige-153	BLMH	Wald ratio	1	0.00416378	0.0281667	0.88248	-0.051043	0.0593706	1.00417	0.950238	1.06117	0.989277
finn-pQTL-R10-v1-CTSH	ukb-saige-153	Colorectal cancer || id:ukb-saige-153	CTSH	Inverse variance weighted	4	0.00294984	0.0239574	0.902005	-0.0440066	0.0499063	1.00295	0.956948	1.05117	0.989537
finn-pQTL-R10-v1-F3	ukb-saige-153	Colorectal cancer || id:ukb-saige-153	F3	Inverse variance weighted	2	0.00776857	0.0653731	0.905407	-0.120363	0.1359	1.0078	0.886599	1.14557	0.989537
finn-pQTL-R10-v1-IL17RA	ukb-saige-153	Colorectal cancer || id:ukb-saige-153	IL17RA	Inverse variance weighted	3	-0.00440235	0.0354492	0.901167	-0.0738827	0.065078	0.995607	0.928781	1.06724	0.989537
finn-pQTL-R10-v1-KAZALD1	ukb-saige-153	Colorectal cancer || id:ukb-saige-153	KAZALD1	Inverse variance weighted	3	0.0213655	0.150391	0.887027	-0.273401	0.316132	1.0216	0.760788	1.37181	0.989537
finn-pQTL-R10-v1-LPA	ukb-saige-153	Colorectal cancer || id:ukb-saige-153	LPA	Inverse variance weighted	3	0.00539352	0.0395587	0.891551	-0.0721415	0.0829286	1.00541	0.930399	1.08646	0.989537
finn-pQTL-R10-v1-QPCT	ukb-saige-153	Colorectal cancer || id:ukb-saige-153	QPCT	Inverse variance weighted	4	0.00611295	0.0456134	0.89339	-0.0832893	0.0955152	1.00613	0.920085	1.10023	0.989537
finn-pQTL-R10-v1-ADAM23	ukb-saige-153	Colorectal cancer || id:ukb-saige-153	ADAM23	Inverse variance weighted	4	-0.00303873	0.0299959	0.919308	-0.0618306	0.0557532	0.996966	0.940042	1.05734	0.990186
finn-pQTL-R10-v1-DPT	ukb-saige-153	Colorectal cancer || id:ukb-saige-153	DPT	Inverse variance weighted	2	-0.00425885	0.0430121	0.921126	-0.0885626	0.0800449	0.99575	0.915246	1.08334	0.990186
finn-pQTL-R10-v1-PCDH9	ukb-saige-153	Colorectal cancer || id:ukb-saige-153	PCDH9	Inverse variance weighted	2	0.00895995	0.0807511	0.91165	-0.149312	0.167232	1.009	0.8613	1.18203	0.990186
finn-pQTL-R10-v1-PSAPL1	ukb-saige-153	Colorectal cancer || id:ukb-saige-153	PSAPL1	Inverse variance weighted	2	0.00619681	0.0633169	0.922036	-0.117904	0.130298	1.00622	0.888781	1.13917	0.990186
finn-pQTL-R10-v1-ABO	ukb-saige-153	Colorectal cancer || id:ukb-saige-153	ABO	MR Egger	3	0.0305873	0.0379149	0.56784	-0.0437259	0.104901	1.03106	0.957216	1.1106	0.991748
finn-pQTL-R10-v1-ADAM15	ukb-saige-153	Colorectal cancer || id:ukb-saige-153	ADAM15	MR Egger	3	-0.0377647	0.0424959	0.537484	-0.121057	0.0455273	0.96294	0.885984	1.04658	0.991748
finn-pQTL-R10-v1-ADAM23	ukb-saige-153	Colorectal cancer || id:ukb-saige-153	ADAM23	MR Egger	4	-0.0328736	0.0636698	0.657052	-0.157666	0.0919192	0.967661	0.854135	1.09628	0.991748
finn-pQTL-R10-v1-ADAMTS8	ukb-saige-153	Colorectal cancer || id:ukb-saige-153	ADAMTS8	MR Egger	3	-0.193886	0.151966	0.423211	-0.49174	0.103967	0.823751	0.611561	1.10956	0.991748
finn-pQTL-R10-v1-ADGRB3	ukb-saige-153	Colorectal cancer || id:ukb-saige-153	ADGRB3	MR Egger	4	0.0311254	0.042199	0.537565	-0.0515847	0.113835	1.03161	0.949723	1.12057	0.991748
finn-pQTL-R10-v1-BTD	ukb-saige-153	Colorectal cancer || id:ukb-saige-153	BTD	MR Egger	3	0.0433713	0.038933	0.465703	-0.0329373	0.11968	1.04433	0.967599	1.12714	0.991748
finn-pQTL-R10-v1-CDH6	ukb-saige-153	Colorectal cancer || id:ukb-saige-153	CDH6	MR Egger	3	0.119695	0.0795647	0.373479	-0.0362519	0.275642	1.12715	0.964397	1.31738	0.991748
finn-pQTL-R10-v1-CST5	ukb-saige-153	Colorectal cancer || id:ukb-saige-153	CST5	MR Egger	3	-0.1329	0.0601366	0.270518	-0.250767	-0.0150318	0.875553	0.778203	0.985081	0.991748
finn-pQTL-R10-v1-CTBS	ukb-saige-153	Colorectal cancer || id:ukb-saige-153	CTBS	MR Egger	4	0.0477625	0.0571486	0.491231	-0.0642489	0.159774	1.04892	0.937772	1.17325	0.991748
finn-pQTL-R10-v1-CTSC	ukb-saige-153	Colorectal cancer || id:ukb-saige-153	CTSC	MR Egger	3	0.043011	0.139888	0.810101	-0.23117	0.317192	1.04395	0.793605	1.37327	0.991748
finn-pQTL-R10-v1-CTSH	ukb-saige-153	Colorectal cancer || id:ukb-saige-153	CTSH	MR Egger	4	-0.0171614	0.0407178	0.714389	-0.0969682	0.0626455	0.982985	0.907585	1.06465	0.991748
finn-pQTL-R10-v1-DPEP1	ukb-saige-153	Colorectal cancer || id:ukb-saige-153	DPEP1	MR Egger	3	0.0669897	0.0562494	0.444658	-0.0432591	0.177238	1.06928	0.957663	1.19392	0.991748
finn-pQTL-R10-v1-DPP7	ukb-saige-153	Colorectal cancer || id:ukb-saige-153	DPP7	MR Egger	4	-0.278258	0.25332	0.386581	-0.774765	0.218249	0.757101	0.460812	1.2439	0.991748
finn-pQTL-R10-v1-ENTPD2	ukb-saige-153	Colorectal cancer || id:ukb-saige-153	ENTPD2	MR Egger	3	0.0605157	0.136416	0.734193	-0.20686	0.327891	1.06238	0.813134	1.38804	0.991748
finn-pQTL-R10-v1-EPPK1	ukb-saige-153	Colorectal cancer || id:ukb-saige-153	EPPK1	MR Egger	3	-0.203065	0.635514	0.803109	-1.44867	1.04254	0.816225	0.234882	2.83642	0.991748
finn-pQTL-R10-v1-FCGR2A	ukb-saige-153	Colorectal cancer || id:ukb-saige-153	FCGR2A	MR Egger	4	-0.00525018	0.0305958	0.879545	-0.065218	0.0547176	0.994764	0.936863	1.05624	0.991748
finn-pQTL-R10-v1-FCGR3B	ukb-saige-153	Colorectal cancer || id:ukb-saige-153	FCGR3B	MR Egger	3	-0.0614632	0.117299	0.692735	-0.29137	0.168444	0.940388	0.747239	1.18346	0.991748
finn-pQTL-R10-v1-FCN2	ukb-saige-153	Colorectal cancer || id:ukb-saige-153	FCN2	MR Egger	3	-0.0732879	0.0927273	0.574207	-0.255033	0.108458	0.929333	0.774891	1.11456	0.991748
finn-pQTL-R10-v1-FCRLB	ukb-saige-153	Colorectal cancer || id:ukb-saige-153	FCRLB	MR Egger	5	-0.0313986	0.0664281	0.668708	-0.161598	0.0988004	0.969089	0.850783	1.10385	0.991748
finn-pQTL-R10-v1-FGFR4	ukb-saige-153	Colorectal cancer || id:ukb-saige-153	FGFR4	MR Egger	3	-0.0279712	0.0402128	0.613092	-0.106788	0.0508458	0.972416	0.898716	1.05216	0.991748
finn-pQTL-R10-v1-FGL1	ukb-saige-153	Colorectal cancer || id:ukb-saige-153	FGL1	MR Egger	5	-0.0677055	0.212852	0.771275	-0.484894	0.349483	0.934536	0.615762	1.41833	0.991748
finn-pQTL-R10-v1-FLRT2	ukb-saige-153	Colorectal cancer || id:ukb-saige-153	FLRT2	MR Egger	4	0.0208605	0.0539499	0.736267	-0.0848813	0.126602	1.02108	0.918621	1.13497	0.991748
finn-pQTL-R10-v1-FOLR3	ukb-saige-153	Colorectal cancer || id:ukb-saige-153	FOLR3	MR Egger	3	0.0962804	0.0407763	0.255038	0.0163589	0.176202	1.10107	1.01649	1.19268	0.991748
finn-pQTL-R10-v1-GALNT5	ukb-saige-153	Colorectal cancer || id:ukb-saige-153	GALNT5	MR Egger	3	0.0187761	0.114783	0.896776	-0.206198	0.24375	1.01895	0.813672	1.27603	0.991748
finn-pQTL-R10-v1-GASK1A	ukb-saige-153	Colorectal cancer || id:ukb-saige-153	GASK1A	MR Egger	3	-0.0194121	0.0916897	0.867179	-0.199124	0.1603	0.980775	0.819448	1.17386	0.991748
finn-pQTL-R10-v1-GC	ukb-saige-153	Colorectal cancer || id:ukb-saige-153	GC	MR Egger	4	0.0757374	0.0346918	0.160708	0.00774151	0.143733	1.07868	1.00777	1.15458	0.991748
finn-pQTL-R10-v1-GPC5	ukb-saige-153	Colorectal cancer || id:ukb-saige-153	GPC5	MR Egger	3	-0.034458	0.0700365	0.70892	-0.17173	0.102814	0.966129	0.842207	1.10828	0.991748
finn-pQTL-R10-v1-HCG22	ukb-saige-153	Colorectal cancer || id:ukb-saige-153	HCG22	MR Egger	3	0.149385	0.162313	0.52639	-0.168749	0.467519	1.16112	0.844721	1.59603	0.991748
finn-pQTL-R10-v1-HGFAC	ukb-saige-153	Colorectal cancer || id:ukb-saige-153	HGFAC	MR Egger	3	-0.255359	0.268196	0.515605	-0.781023	0.270304	0.774638	0.457937	1.31036	0.991748
finn-pQTL-R10-v1-HMCN2	ukb-saige-153	Colorectal cancer || id:ukb-saige-153	HMCN2	MR Egger	4	-0.110852	0.0708719	0.258243	-0.249761	0.028057	0.895071	0.778987	1.02845	0.991748
finn-pQTL-R10-v1-HS6ST1	ukb-saige-153	Colorectal cancer || id:ukb-saige-153	HS6ST1	MR Egger	3	0.0275634	0.0662714	0.749075	-0.102329	0.157455	1.02795	0.902733	1.17053	0.991748
finn-pQTL-R10-v1-HSDL2	ukb-saige-153	Colorectal cancer || id:ukb-saige-153	HSDL2	MR Egger	4	-0.0288082	0.0523908	0.637611	-0.131494	0.0738777	0.971603	0.876784	1.07668	0.991748
finn-pQTL-R10-v1-IGFBP3	ukb-saige-153	Colorectal cancer || id:ukb-saige-153	IGFBP3	MR Egger	3	0.206137	0.128483	0.354833	-0.0456905	0.457964	1.22892	0.955338	1.58085	0.991748
finn-pQTL-R10-v1-IL17RA	ukb-saige-153	Colorectal cancer || id:ukb-saige-153	IL17RA	MR Egger	3	0.224001	0.107029	0.283764	0.0142243	0.433778	1.25107	1.01433	1.54308	0.991748
finn-pQTL-R10-v1-IL17RB	ukb-saige-153	Colorectal cancer || id:ukb-saige-153	IL17RB	MR Egger	3	0.0459165	0.409877	0.928979	-0.757442	0.849275	1.04699	0.468864	2.33795	0.991748
finn-pQTL-R10-v1-IL1RL1	ukb-saige-153	Colorectal cancer || id:ukb-saige-153	IL1RL1	MR Egger	3	0.0660332	0.0739327	0.535892	-0.0788749	0.210941	1.06826	0.924156	1.23484	0.991748
finn-pQTL-R10-v1-IL1RL2	ukb-saige-153	Colorectal cancer || id:ukb-saige-153	IL1RL2	MR Egger	3	-0.0691223	0.0924914	0.59142	-0.250405	0.112161	0.933213	0.778485	1.11869	0.991748
finn-pQTL-R10-v1-IL5RA	ukb-saige-153	Colorectal cancer || id:ukb-saige-153	IL5RA	MR Egger	3	-0.302966	0.143265	0.281203	-0.583766	-0.0221666	0.738624	0.557794	0.978077	0.991748
finn-pQTL-R10-v1-KAZALD1	ukb-saige-153	Colorectal cancer || id:ukb-saige-153	KAZALD1	MR Egger	3	-0.198571	0.829833	0.850475	-1.82504	1.4279	0.819901	0.161211	4.16994	0.991748
finn-pQTL-R10-v1-KLB	ukb-saige-153	Colorectal cancer || id:ukb-saige-153	KLB	MR Egger	3	0.0135501	0.0564794	0.8501	-0.0971494	0.12425	1.01364	0.90742	1.1323	0.991748
finn-pQTL-R10-v1-KLK15	ukb-saige-153	Colorectal cancer || id:ukb-saige-153	KLK15	MR Egger	4	0.0438008	0.0856147	0.659817	-0.124004	0.211606	1.04477	0.883376	1.23566	0.991748
finn-pQTL-R10-v1-LAIR2	ukb-saige-153	Colorectal cancer || id:ukb-saige-153	LAIR2	MR Egger	4	-0.0523109	0.0450085	0.365075	-0.140528	0.0359058	0.949034	0.8689	1.03656	0.991748
finn-pQTL-R10-v1-LAYN	ukb-saige-153	Colorectal cancer || id:ukb-saige-153	LAYN	MR Egger	3	-0.0605261	0.184708	0.798409	-0.422554	0.301502	0.941269	0.655371	1.35189	0.991748
finn-pQTL-R10-v1-LPA	ukb-saige-153	Colorectal cancer || id:ukb-saige-153	LPA	MR Egger	3	0.0453565	0.19317	0.853181	-0.333257	0.42397	1.0464	0.716586	1.52802	0.991748
finn-pQTL-R10-v1-LY75	ukb-saige-153	Colorectal cancer || id:ukb-saige-153	LY75	MR Egger	4	-0.041947	0.0397572	0.402027	-0.119871	0.0359772	0.958921	0.887035	1.03663	0.991748
finn-pQTL-R10-v1-LYPD8	ukb-saige-153	Colorectal cancer || id:ukb-saige-153	LYPD8	MR Egger	3	0.038328	0.121576	0.805578	-0.19996	0.276616	1.03907	0.818763	1.31866	0.991748
finn-pQTL-R10-v1-MATN3	ukb-saige-153	Colorectal cancer || id:ukb-saige-153	MATN3	MR Egger	3	0.193741	0.0784916	0.245053	0.039897	0.347584	1.21378	1.0407	1.41564	0.991748
finn-pQTL-R10-v1-MBL2	ukb-saige-153	Colorectal cancer || id:ukb-saige-153	MBL2	MR Egger	3	-0.00567124	0.0443599	0.91905	-0.0926166	0.0812741	0.994345	0.911543	1.08467	0.991748
finn-pQTL-R10-v1-MDGA1	ukb-saige-153	Colorectal cancer || id:ukb-saige-153	MDGA1	MR Egger	3	-0.0937164	0.0777578	0.440922	-0.246122	0.0586889	0.910541	0.781827	1.06045	0.991748
finn-pQTL-R10-v1-MELTF	ukb-saige-153	Colorectal cancer || id:ukb-saige-153	MELTF	MR Egger	4	-0.143275	0.17119	0.490701	-0.478808	0.192258	0.866515	0.619521	1.21198	0.991748
finn-pQTL-R10-v1-MIA	ukb-saige-153	Colorectal cancer || id:ukb-saige-153	MIA	MR Egger	5	0.0389068	0.0420497	0.423077	-0.0435106	0.121324	1.03967	0.957422	1.12899	0.991748
finn-pQTL-R10-v1-MILR1	ukb-saige-153	Colorectal cancer || id:ukb-saige-153	MILR1	MR Egger	3	0.297429	0.189929	0.36179	-0.0748324	0.66969	1.34639	0.927899	1.95363	0.991748
finn-pQTL-R10-v1-MMP12	ukb-saige-153	Colorectal cancer || id:ukb-saige-153	MMP12	MR Egger	4	0.0359148	0.0703567	0.660486	-0.101984	0.173814	1.03657	0.903044	1.18983	0.991748
finn-pQTL-R10-v1-NELL1	ukb-saige-153	Colorectal cancer || id:ukb-saige-153	NELL1	MR Egger	3	-0.192392	0.0976365	0.298968	-0.38376	-0.00102499	0.824983	0.681295	0.998976	0.991748
finn-pQTL-R10-v1-OBP2B	ukb-saige-153	Colorectal cancer || id:ukb-saige-153	OBP2B	MR Egger	3	0.0790156	0.0484648	0.350258	-0.0159755	0.174007	1.08222	0.984151	1.19006	0.991748
finn-pQTL-R10-v1-OGN	ukb-saige-153	Colorectal cancer || id:ukb-saige-153	OGN	MR Egger	3	-0.02156	0.10487	0.870917	-0.227105	0.183985	0.978671	0.796837	1.202	0.991748
finn-pQTL-R10-v1-OLFM4	ukb-saige-153	Colorectal cancer || id:ukb-saige-153	OLFM4	MR Egger	3	0.0119791	0.0550809	0.863669	-0.0959795	0.119938	1.01205	0.908483	1.12743	0.991748
finn-pQTL-R10-v1-PCDHB15	ukb-saige-153	Colorectal cancer || id:ukb-saige-153	PCDHB15	MR Egger	3	0.300097	0.157841	0.308254	-0.00927158	0.609466	1.34999	0.990771	1.83945	0.991748
finn-pQTL-R10-v1-PCSK9	ukb-saige-153	Colorectal cancer || id:ukb-saige-153	PCSK9	MR Egger	4	-0.122271	0.154303	0.511185	-0.424705	0.180163	0.884908	0.653962	1.19741	0.991748
finn-pQTL-R10-v1-PDGFRB	ukb-saige-153	Colorectal cancer || id:ukb-saige-153	PDGFRB	MR Egger	4	0.0219382	0.0319724	0.563478	-0.0407277	0.0846041	1.02218	0.960091	1.08829	0.991748
finn-pQTL-R10-v1-PGLYRP2	ukb-saige-153	Colorectal cancer || id:ukb-saige-153	PGLYRP2	MR Egger	4	-0.035958	0.0313911	0.370588	-0.0974845	0.0255685	0.964681	0.907116	1.0259	0.991748
finn-pQTL-R10-v1-PILRA	ukb-saige-153	Colorectal cancer || id:ukb-saige-153	PILRA	MR Egger	3	0.00970598	0.0697497	0.911977	-0.127004	0.146415	1.00975	0.880731	1.15768	0.991748
finn-pQTL-R10-v1-PILRB	ukb-saige-153	Colorectal cancer || id:ukb-saige-153	PILRB	MR Egger	4	0.0314025	0.0329081	0.440667	-0.0330975	0.0959024	1.0319	0.967444	1.10065	0.991748
finn-pQTL-R10-v1-PLA2G2A	ukb-saige-153	Colorectal cancer || id:ukb-saige-153	PLA2G2A	MR Egger	5	0.0239545	0.0437905	0.622426	-0.0618749	0.109784	1.02424	0.94	1.11604	0.991748
finn-pQTL-R10-v1-PLB1	ukb-saige-153	Colorectal cancer || id:ukb-saige-153	PLB1	MR Egger	3	-0.185184	0.187809	0.504481	-0.55329	0.182922	0.830952	0.575055	1.20072	0.991748
finn-pQTL-R10-v1-PM20D1	ukb-saige-153	Colorectal cancer || id:ukb-saige-153	PM20D1	MR Egger	3	-0.0864224	0.395263	0.862963	-0.861138	0.688293	0.917207	0.422681	1.99032	0.991748
finn-pQTL-R10-v1-PRAP1	ukb-saige-153	Colorectal cancer || id:ukb-saige-153	PRAP1	MR Egger	3	-0.0309476	0.0771636	0.757178	-0.182188	0.120293	0.969526	0.833444	1.12783	0.991748
finn-pQTL-R10-v1-PRTG	ukb-saige-153	Colorectal cancer || id:ukb-saige-153	PRTG	MR Egger	3	0.147254	0.244338	0.654711	-0.331648	0.626157	1.15865	0.71774	1.87041	0.991748
finn-pQTL-R10-v1-PSCA	ukb-saige-153	Colorectal cancer || id:ukb-saige-153	PSCA	MR Egger	4	0.0308722	0.0390942	0.512466	-0.0457526	0.107497	1.03135	0.955278	1.11349	0.991748
finn-pQTL-R10-v1-QPCT	ukb-saige-153	Colorectal cancer || id:ukb-saige-153	QPCT	MR Egger	4	0.109412	0.135178	0.503273	-0.155536	0.374361	1.11562	0.855956	1.45406	0.991748
finn-pQTL-R10-v1-RARRES1	ukb-saige-153	Colorectal cancer || id:ukb-saige-153	RARRES1	MR Egger	3	-0.0160773	0.141656	0.928055	-0.293724	0.261569	0.984051	0.745482	1.29897	0.991748
finn-pQTL-R10-v1-RNASE10	ukb-saige-153	Colorectal cancer || id:ukb-saige-153	RNASE10	MR Egger	4	0.0594795	0.0565346	0.403116	-0.0513283	0.170287	1.06128	0.949967	1.18565	0.991748
finn-pQTL-R10-v1-TNXB	ukb-saige-153	Colorectal cancer || id:ukb-saige-153	TNXB	MR Egger	3	0.281083	0.126131	0.268526	0.033866	0.528301	1.32456	1.03445	1.69605	0.991748
finn-pQTL-R10-v1-ULBP2	ukb-saige-153	Colorectal cancer || id:ukb-saige-153	ULBP2	MR Egger	3	0.0394549	0.295308	0.915444	-0.539348	0.618258	1.04024	0.583128	1.85569	0.991748
finn-pQTL-R10-v1-EPHA1	ukb-saige-153	Colorectal cancer || id:ukb-saige-153	EPHA1	Wald ratio	1	0.0126485	0.0903463	0.88866	-0.16443	0.189727	1.01273	0.848377	1.20892	0.991993
finn-pQTL-R10-v1-SERPINA11	ukb-saige-153	Colorectal cancer || id:ukb-saige-153	SERPINA11	Wald ratio	1	-0.00594348	0.0421795	0.887942	-0.0886154	0.0767284	0.994074	0.915198	1.07975	0.991993
finn-pQTL-R10-v1-BST1	ukb-saige-153	Colorectal cancer || id:ukb-saige-153	BST1	MR Egger	4	-0.0014856	0.0396143	0.973492	-0.0791297	0.0761585	0.998516	0.92392	1.07913	0.992465
finn-pQTL-R10-v1-HSD17B14	ukb-saige-153	Colorectal cancer || id:ukb-saige-153	HSD17B14	MR Egger	3	-0.00517825	0.0581168	0.943426	-0.119087	0.108731	0.994835	0.88773	1.11486	0.992465
finn-pQTL-R10-v1-LBP	ukb-saige-153	Colorectal cancer || id:ukb-saige-153	LBP	MR Egger	3	0.00118297	0.09994	0.992465	-0.194699	0.197065	1.00118	0.823082	1.21782	0.992465
finn-pQTL-R10-v1-LILRA6	ukb-saige-153	Colorectal cancer || id:ukb-saige-153	LILRA6	MR Egger	3	-0.0029647	0.0618719	0.969519	-0.124234	0.118304	0.99704	0.883174	1.12559	0.992465
finn-pQTL-R10-v1-NCAM2	ukb-saige-153	Colorectal cancer || id:ukb-saige-153	NCAM2	MR Egger	3	0.00212198	0.133316	0.989868	-0.259177	0.263421	1.00212	0.771686	1.30137	0.992465
finn-pQTL-R10-v1-APOH	ukb-saige-153	Colorectal cancer || id:ukb-saige-153	APOH	Inverse variance weighted	2	-0.00557846	0.0706539	0.937069	-0.14406	0.132903	0.994437	0.865836	1.14214	0.995053
finn-pQTL-R10-v1-DDC	ukb-saige-153	Colorectal cancer || id:ukb-saige-153	DDC	Inverse variance weighted	2	-0.00329195	0.047664	0.944937	-0.0967135	0.0901296	0.996713	0.907816	1.09432	0.995053
finn-pQTL-R10-v1-ENTPD2	ukb-saige-153	Colorectal cancer || id:ukb-saige-153	ENTPD2	Inverse variance weighted	3	0.00170856	0.0320144	0.957438	-0.0610398	0.0644569	1.00171	0.940786	1.06658	0.995053
finn-pQTL-R10-v1-HNMT	ukb-saige-153	Colorectal cancer || id:ukb-saige-153	HNMT	Inverse variance weighted	2	-0.0012491	0.0297909	0.966555	-0.0596393	0.0571411	0.998752	0.942104	1.05881	0.995053
finn-pQTL-R10-v1-KLK12	ukb-saige-153	Colorectal cancer || id:ukb-saige-153	KLK12	Inverse variance weighted	2	0.000693733	0.0188229	0.9706	-0.0361991	0.0375866	1.00069	0.964448	1.0383	0.995053
finn-pQTL-R10-v1-KLK15	ukb-saige-153	Colorectal cancer || id:ukb-saige-153	KLK15	Inverse variance weighted	4	-0.00141717	0.0230003	0.950869	-0.0464977	0.0436634	0.998584	0.954567	1.04463	0.995053
finn-pQTL-R10-v1-LILRB1	ukb-saige-153	Colorectal cancer || id:ukb-saige-153	LILRB1	Inverse variance weighted	2	-0.0023309	0.0330674	0.943804	-0.067143	0.0624812	0.997672	0.935061	1.06447	0.995053
finn-pQTL-R10-v1-MDGA1	ukb-saige-153	Colorectal cancer || id:ukb-saige-153	MDGA1	Inverse variance weighted	3	0.000733528	0.0200954	0.970882	-0.0386534	0.0401205	1.00073	0.962084	1.04094	0.995053
finn-pQTL-R10-v1-MEP1B	ukb-saige-153	Colorectal cancer || id:ukb-saige-153	MEP1B	Inverse variance weighted	2	-0.000894319	0.0187735	0.962005	-0.0376903	0.0359017	0.999106	0.963011	1.03655	0.995053
finn-pQTL-R10-v1-NT5E	ukb-saige-153	Colorectal cancer || id:ukb-saige-153	NT5E	Inverse variance weighted	2	-0.00208195	0.0418046	0.96028	-0.084019	0.0798551	0.99792	0.919414	1.08313	0.995053
finn-pQTL-R10-v1-REG3G	ukb-saige-153	Colorectal cancer || id:ukb-saige-153	REG3G	Inverse variance weighted	2	0.00366648	0.0422557	0.930855	-0.0791546	0.0864876	1.00367	0.923897	1.09034	0.995053
finn-pQTL-R10-v1-BPIFA2	ukb-saige-153	Colorectal cancer || id:ukb-saige-153	BPIFA2	Wald ratio	1	-0.0124926	0.10708	0.907124	-0.222369	0.197384	0.987585	0.80062	1.21821	0.995782
finn-pQTL-R10-v1-DDAH1	ukb-saige-153	Colorectal cancer || id:ukb-saige-153	DDAH1	Wald ratio	1	0.0105606	0.0968054	0.91313	-0.179178	0.200299	1.01062	0.835957	1.22177	0.995782
finn-pQTL-R10-v1-DDX58	ukb-saige-153	Colorectal cancer || id:ukb-saige-153	DDX58	Wald ratio	1	-0.014013	0.107433	0.896222	-0.224582	0.196556	0.986085	0.79885	1.2172	0.995782
finn-pQTL-R10-v1-FCAMR	ukb-saige-153	Colorectal cancer || id:ukb-saige-153	FCAMR	Wald ratio	1	-0.00492971	0.0492971	0.920344	-0.101552	0.0916926	0.995082	0.903434	1.09603	0.995782
finn-pQTL-R10-v1-IL22RA1	ukb-saige-153	Colorectal cancer || id:ukb-saige-153	IL22RA1	Wald ratio	1	0.00834417	0.0780583	0.914871	-0.14465	0.161339	1.00838	0.865325	1.17508	0.995782
finn-pQTL-R10-v1-IL4R	ukb-saige-153	Colorectal cancer || id:ukb-saige-153	IL4R	Wald ratio	1	-0.00811333	0.0776058	0.916736	-0.160221	0.143994	0.991919	0.851956	1.15488	0.995782
finn-pQTL-R10-v1-KLRK1	ukb-saige-153	Colorectal cancer || id:ukb-saige-153	KLRK1	Wald ratio	1	0.00582398	0.0445363	0.895958	-0.0814672	0.0931152	1.00584	0.921763	1.09759	0.995782
finn-pQTL-R10-v1-LY6D	ukb-saige-153	Colorectal cancer || id:ukb-saige-153	LY6D	Wald ratio	1	0.00509669	0.0415286	0.902323	-0.0762993	0.0864926	1.00511	0.926539	1.09034	0.995782
finn-pQTL-R10-v1-NAGPA	ukb-saige-153	Colorectal cancer || id:ukb-saige-153	NAGPA	Wald ratio	1	-0.00720971	0.0630849	0.909011	-0.130856	0.116437	0.992816	0.877344	1.12349	0.995782
finn-pQTL-R10-v1-NRCAM	ukb-saige-153	Colorectal cancer || id:ukb-saige-153	NRCAM	Wald ratio	1	-0.00817898	0.0723525	0.909996	-0.14999	0.133632	0.991854	0.860717	1.14297	0.995782
finn-pQTL-R10-v1-PDCD1LG2	ukb-saige-153	Colorectal cancer || id:ukb-saige-153	PDCD1LG2	Wald ratio	1	-0.00379911	0.0348252	0.91313	-0.0720564	0.0644582	0.996208	0.930478	1.06658	0.995782
finn-pQTL-R10-v1-PYY	ukb-saige-153	Colorectal cancer || id:ukb-saige-153	PYY	Wald ratio	1	0.0113382	0.0965847	0.90655	-0.177968	0.200644	1.0114	0.836969	1.22219	0.995782
finn-pQTL-R10-v1-SERPINA9	ukb-saige-153	Colorectal cancer || id:ukb-saige-153	SERPINA9	Wald ratio	1	0.00447074	0.0447074	0.920344	-0.0831557	0.0920972	1.00448	0.920208	1.09647	0.995782
finn-pQTL-R10-v1-SIRPA	ukb-saige-153	Colorectal cancer || id:ukb-saige-153	SIRPA	Wald ratio	1	-0.0023671	0.0185987	0.898725	-0.0388205	0.0340863	0.997636	0.961923	1.03467	0.995782
finn-pQTL-R10-v1-THY1	ukb-saige-153	Colorectal cancer || id:ukb-saige-153	THY1	Wald ratio	1	0.00722499	0.0634389	0.909326	-0.117115	0.131565	1.00725	0.889483	1.14061	0.995782
finn-pQTL-R10-v1-ABO	ukb-saige-153	Colorectal cancer || id:ukb-saige-153	ABO	Weighted mode	3	0.0162163	0.0185517	0.474232	-0.020145	0.0525776	1.01635	0.980057	1.05398	0.997172
finn-pQTL-R10-v1-ADAM15	ukb-saige-153	Colorectal cancer || id:ukb-saige-153	ADAM15	Weighted mode	3	-0.0243619	0.0279781	0.4757	-0.079199	0.0304751	0.975932	0.923856	1.03094	0.997172
finn-pQTL-R10-v1-ADAM23	ukb-saige-153	Colorectal cancer || id:ukb-saige-153	ADAM23	Weighted mode	4	0.000135736	0.0352839	0.997172	-0.0690207	0.0692921	1.00014	0.933307	1.07175	0.997172
finn-pQTL-R10-v1-ADAMTS8	ukb-saige-153	Colorectal cancer || id:ukb-saige-153	ADAMTS8	Weighted mode	3	-0.052095	0.0469909	0.383056	-0.144197	0.0400072	0.949239	0.865717	1.04082	0.997172
finn-pQTL-R10-v1-ADGRB3	ukb-saige-153	Colorectal cancer || id:ukb-saige-153	ADGRB3	Weighted mode	4	0.0112231	0.0240551	0.672607	-0.0359249	0.0583711	1.01129	0.964713	1.06011	0.997172
finn-pQTL-R10-v1-BST1	ukb-saige-153	Colorectal cancer || id:ukb-saige-153	BST1	Weighted mode	4	0.0191269	0.0212536	0.434479	-0.0225301	0.060784	1.01931	0.977722	1.06267	0.997172
finn-pQTL-R10-v1-BTD	ukb-saige-153	Colorectal cancer || id:ukb-saige-153	BTD	Weighted mode	3	0.00194637	0.0333943	0.958821	-0.0635064	0.0673991	1.00195	0.938468	1.06972	0.997172
finn-pQTL-R10-v1-CDH6	ukb-saige-153	Colorectal cancer || id:ukb-saige-153	CDH6	Weighted mode	3	0.0012283	0.0325628	0.973337	-0.0625947	0.0650513	1.00123	0.939324	1.06721	0.997172
finn-pQTL-R10-v1-CST5	ukb-saige-153	Colorectal cancer || id:ukb-saige-153	CST5	Weighted mode	3	-0.0416898	0.0285717	0.281928	-0.0976904	0.0143108	0.959167	0.90693	1.01441	0.997172
finn-pQTL-R10-v1-CTBS	ukb-saige-153	Colorectal cancer || id:ukb-saige-153	CTBS	Weighted mode	4	-0.0083198	0.0346501	0.825717	-0.0762339	0.0595943	0.991715	0.926599	1.06141	0.997172
finn-pQTL-R10-v1-CTSC	ukb-saige-153	Colorectal cancer || id:ukb-saige-153	CTSC	Weighted mode	3	0.014104	0.0276617	0.660834	-0.0401129	0.0683209	1.0142	0.960681	1.07071	0.997172
finn-pQTL-R10-v1-CTSH	ukb-saige-153	Colorectal cancer || id:ukb-saige-153	CTSH	Weighted mode	4	-0.00134009	0.0261726	0.962383	-0.0526385	0.0499583	0.998661	0.948723	1.05123	0.997172
finn-pQTL-R10-v1-DPEP1	ukb-saige-153	Colorectal cancer || id:ukb-saige-153	DPEP1	Weighted mode	3	0.0649906	0.0262422	0.131611	0.0135558	0.116425	1.06715	1.01365	1.12347	0.997172
finn-pQTL-R10-v1-DPP7	ukb-saige-153	Colorectal cancer || id:ukb-saige-153	DPP7	Weighted mode	4	0.0637537	0.115938	0.620683	-0.163484	0.290992	1.06583	0.84918	1.33775	0.997172
finn-pQTL-R10-v1-ENTPD2	ukb-saige-153	Colorectal cancer || id:ukb-saige-153	ENTPD2	Weighted mode	3	0.00590166	0.042413	0.902081	-0.0772277	0.089031	1.00592	0.925679	1.09311	0.997172
finn-pQTL-R10-v1-EPPK1	ukb-saige-153	Colorectal cancer || id:ukb-saige-153	EPPK1	Weighted mode	3	-0.0479722	0.0461935	0.408111	-0.138511	0.042567	0.95316	0.870653	1.04349	0.997172
finn-pQTL-R10-v1-FCGR2A	ukb-saige-153	Colorectal cancer || id:ukb-saige-153	FCGR2A	Weighted mode	4	-0.0141312	0.0225533	0.575381	-0.0583357	0.0300734	0.985968	0.943333	1.03053	0.997172
finn-pQTL-R10-v1-FCGR3B	ukb-saige-153	Colorectal cancer || id:ukb-saige-153	FCGR3B	Weighted mode	3	-0.00249588	0.0322595	0.945374	-0.0657244	0.0607327	0.997507	0.936389	1.06261	0.997172
finn-pQTL-R10-v1-FCN2	ukb-saige-153	Colorectal cancer || id:ukb-saige-153	FCN2	Weighted mode	3	-0.0307285	0.0342544	0.464352	-0.0978671	0.0364101	0.969739	0.906769	1.03708	0.997172
finn-pQTL-R10-v1-FCRLB	ukb-saige-153	Colorectal cancer || id:ukb-saige-153	FCRLB	Weighted mode	5	0.00770927	0.0303264	0.811866	-0.0517305	0.067149	1.00774	0.949585	1.06945	0.997172
finn-pQTL-R10-v1-FGFR4	ukb-saige-153	Colorectal cancer || id:ukb-saige-153	FGFR4	Weighted mode	3	-0.0177377	0.0228073	0.518129	-0.0624401	0.0269647	0.982419	0.939469	1.02733	0.997172
finn-pQTL-R10-v1-FGL1	ukb-saige-153	Colorectal cancer || id:ukb-saige-153	FGL1	Weighted mode	5	0.00990747	0.0280433	0.741703	-0.0450574	0.0648724	1.00996	0.955943	1.06702	0.997172
finn-pQTL-R10-v1-FLRT2	ukb-saige-153	Colorectal cancer || id:ukb-saige-153	FLRT2	Weighted mode	4	0.0190662	0.0311285	0.583509	-0.0419457	0.0800781	1.01925	0.958922	1.08337	0.997172
finn-pQTL-R10-v1-FOLR3	ukb-saige-153	Colorectal cancer || id:ukb-saige-153	FOLR3	Weighted mode	3	0.0721619	0.0275986	0.120415	0.0180686	0.126255	1.07483	1.01823	1.13457	0.997172
finn-pQTL-R10-v1-GALNT5	ukb-saige-153	Colorectal cancer || id:ukb-saige-153	GALNT5	Weighted mode	3	0.0373017	0.0511134	0.541423	-0.0628804	0.137484	1.03801	0.939056	1.14738	0.997172
finn-pQTL-R10-v1-GASK1A	ukb-saige-153	Colorectal cancer || id:ukb-saige-153	GASK1A	Weighted mode	3	-0.021488	0.0299707	0.547818	-0.0802305	0.0372545	0.978741	0.922904	1.03796	0.997172
finn-pQTL-R10-v1-GC	ukb-saige-153	Colorectal cancer || id:ukb-saige-153	GC	Weighted mode	4	0.0376493	0.0189166	0.140646	0.000572685	0.0747259	1.03837	1.00057	1.07759	0.997172
finn-pQTL-R10-v1-GPC5	ukb-saige-153	Colorectal cancer || id:ukb-saige-153	GPC5	Weighted mode	3	-0.0405053	0.0287764	0.294556	-0.096907	0.0158965	0.960304	0.90764	1.01602	0.997172
finn-pQTL-R10-v1-HCG22	ukb-saige-153	Colorectal cancer || id:ukb-saige-153	HCG22	Weighted mode	3	-0.00194379	0.0376363	0.963505	-0.0757108	0.0718233	0.998058	0.927084	1.07447	0.997172
finn-pQTL-R10-v1-HGFAC	ukb-saige-153	Colorectal cancer || id:ukb-saige-153	HGFAC	Weighted mode	3	-0.0408755	0.0597727	0.564671	-0.15803	0.0762791	0.959949	0.853824	1.07926	0.997172
finn-pQTL-R10-v1-HMCN2	ukb-saige-153	Colorectal cancer || id:ukb-saige-153	HMCN2	Weighted mode	4	-0.0126895	0.0318225	0.716758	-0.0750616	0.0496827	0.987391	0.927686	1.05094	0.997172
finn-pQTL-R10-v1-HS6ST1	ukb-saige-153	Colorectal cancer || id:ukb-saige-153	HS6ST1	Weighted mode	3	-0.00415795	0.0459964	0.93621	-0.0943109	0.085995	0.995851	0.91	1.0898	0.997172
finn-pQTL-R10-v1-HSD17B14	ukb-saige-153	Colorectal cancer || id:ukb-saige-153	HSD17B14	Weighted mode	3	-0.0313485	0.0331468	0.444104	-0.0963162	0.0336192	0.969138	0.908177	1.03419	0.997172
finn-pQTL-R10-v1-HSDL2	ukb-saige-153	Colorectal cancer || id:ukb-saige-153	HSDL2	Weighted mode	4	0.0118828	0.0229131	0.639863	-0.0330269	0.0567925	1.01195	0.967513	1.05844	0.997172
finn-pQTL-R10-v1-IGFBP3	ukb-saige-153	Colorectal cancer || id:ukb-saige-153	IGFBP3	Weighted mode	3	0.0784386	0.0434389	0.212715	-0.00670176	0.163579	1.0816	0.993321	1.17772	0.997172
finn-pQTL-R10-v1-IL17RA	ukb-saige-153	Colorectal cancer || id:ukb-saige-153	IL17RA	Weighted mode	3	0.00734806	0.0245189	0.792691	-0.040709	0.0554051	1.00738	0.960108	1.05697	0.997172
finn-pQTL-R10-v1-IL17RB	ukb-saige-153	Colorectal cancer || id:ukb-saige-153	IL17RB	Weighted mode	3	-0.00722951	0.0409871	0.876236	-0.0875643	0.0731052	0.992797	0.91616	1.07584	0.997172
finn-pQTL-R10-v1-IL1RL1	ukb-saige-153	Colorectal cancer || id:ukb-saige-153	IL1RL1	Weighted mode	3	-0.0114651	0.028605	0.727325	-0.067531	0.0446007	0.9886	0.934699	1.04561	0.997172
finn-pQTL-R10-v1-IL1RL2	ukb-saige-153	Colorectal cancer || id:ukb-saige-153	IL1RL2	Weighted mode	3	0.0140236	0.0388563	0.752724	-0.0621347	0.0901818	1.01412	0.939756	1.09437	0.997172
finn-pQTL-R10-v1-IL5RA	ukb-saige-153	Colorectal cancer || id:ukb-saige-153	IL5RA	Weighted mode	3	-0.0844543	0.0513098	0.241514	-0.185022	0.0161129	0.919014	0.831086	1.01624	0.997172
finn-pQTL-R10-v1-KAZALD1	ukb-saige-153	Colorectal cancer || id:ukb-saige-153	KAZALD1	Weighted mode	3	-0.102381	0.126849	0.504332	-0.351005	0.146244	0.902686	0.70398	1.15748	0.997172
finn-pQTL-R10-v1-KLB	ukb-saige-153	Colorectal cancer || id:ukb-saige-153	KLB	Weighted mode	3	0.000439749	0.0292131	0.989356	-0.0568179	0.0576974	1.00044	0.944766	1.05939	0.997172
finn-pQTL-R10-v1-KLK15	ukb-saige-153	Colorectal cancer || id:ukb-saige-153	KLK15	Weighted mode	4	-0.00294646	0.0284663	0.924092	-0.0587404	0.0528474	0.997058	0.942952	1.05427	0.997172
finn-pQTL-R10-v1-LAIR2	ukb-saige-153	Colorectal cancer || id:ukb-saige-153	LAIR2	Weighted mode	4	0.00440718	0.0264457	0.878244	-0.0474263	0.0562407	1.00442	0.953681	1.05785	0.997172
finn-pQTL-R10-v1-LAYN	ukb-saige-153	Colorectal cancer || id:ukb-saige-153	LAYN	Weighted mode	3	-0.0569123	0.105082	0.642363	-0.262874	0.149049	0.944677	0.768839	1.16073	0.997172
finn-pQTL-R10-v1-LBP	ukb-saige-153	Colorectal cancer || id:ukb-saige-153	LBP	Weighted mode	3	-0.0143425	0.03279	0.704518	-0.0786109	0.0499258	0.98576	0.9244	1.05119	0.997172
finn-pQTL-R10-v1-LILRA6	ukb-saige-153	Colorectal cancer || id:ukb-saige-153	LILRA6	Weighted mode	3	-0.0135025	0.0264003	0.659907	-0.065247	0.0382421	0.986588	0.936836	1.03898	0.997172
finn-pQTL-R10-v1-LPA	ukb-saige-153	Colorectal cancer || id:ukb-saige-153	LPA	Weighted mode	3	0.0165886	0.0465552	0.755679	-0.0746596	0.107837	1.01673	0.928059	1.11387	0.997172
finn-pQTL-R10-v1-LY75	ukb-saige-153	Colorectal cancer || id:ukb-saige-153	LY75	Weighted mode	4	-0.0282764	0.0233555	0.312694	-0.0740533	0.0175004	0.97212	0.928622	1.01765	0.997172
finn-pQTL-R10-v1-LYPD8	ukb-saige-153	Colorectal cancer || id:ukb-saige-153	LYPD8	Weighted mode	3	0.0261936	0.0556891	0.684407	-0.0829571	0.135344	1.02654	0.920391	1.14493	0.997172
finn-pQTL-R10-v1-MATN3	ukb-saige-153	Colorectal cancer || id:ukb-saige-153	MATN3	Weighted mode	3	0.115009	0.0346865	0.0801748	0.0470232	0.182994	1.12188	1.04815	1.20081	0.997172
finn-pQTL-R10-v1-MBL2	ukb-saige-153	Colorectal cancer || id:ukb-saige-153	MBL2	Weighted mode	3	-0.0223558	0.0207351	0.393721	-0.0629966	0.0182851	0.977892	0.938947	1.01845	0.997172
finn-pQTL-R10-v1-MDGA1	ukb-saige-153	Colorectal cancer || id:ukb-saige-153	MDGA1	Weighted mode	3	-0.00356512	0.0189934	0.868428	-0.0407923	0.033662	0.996441	0.960029	1.03424	0.997172
finn-pQTL-R10-v1-MELTF	ukb-saige-153	Colorectal cancer || id:ukb-saige-153	MELTF	Weighted mode	4	-0.0992815	0.0736014	0.27015	-0.24354	0.0449772	0.905488	0.783848	1.046	0.997172
finn-pQTL-R10-v1-MIA	ukb-saige-153	Colorectal cancer || id:ukb-saige-153	MIA	Weighted mode	5	0.0313077	0.0301724	0.358049	-0.0278302	0.0904456	1.0318	0.972553	1.09466	0.997172
finn-pQTL-R10-v1-MILR1	ukb-saige-153	Colorectal cancer || id:ukb-saige-153	MILR1	Weighted mode	3	0.034728	0.0929096	0.74447	-0.147375	0.216831	1.03534	0.86297	1.24213	0.997172
finn-pQTL-R10-v1-MMP12	ukb-saige-153	Colorectal cancer || id:ukb-saige-153	MMP12	Weighted mode	4	0.0592185	0.0367364	0.205357	-0.0127848	0.131222	1.06101	0.987297	1.14022	0.997172
finn-pQTL-R10-v1-NCAM2	ukb-saige-153	Colorectal cancer || id:ukb-saige-153	NCAM2	Weighted mode	3	-0.00978612	0.0344652	0.803151	-0.077338	0.0577657	0.990262	0.925577	1.05947	0.997172
finn-pQTL-R10-v1-NELL1	ukb-saige-153	Colorectal cancer || id:ukb-saige-153	NELL1	Weighted mode	3	-0.121372	0.0506613	0.138844	-0.220668	-0.0220757	0.885705	0.801983	0.978166	0.997172
finn-pQTL-R10-v1-OBP2B	ukb-saige-153	Colorectal cancer || id:ukb-saige-153	OBP2B	Weighted mode	3	0.0425103	0.0289416	0.279627	-0.0142152	0.0992359	1.04343	0.985885	1.10433	0.997172
finn-pQTL-R10-v1-OGN	ukb-saige-153	Colorectal cancer || id:ukb-saige-153	OGN	Weighted mode	3	0.020869	0.031487	0.575635	-0.0408455	0.0825836	1.02109	0.959977	1.08609	0.997172
finn-pQTL-R10-v1-OLFM4	ukb-saige-153	Colorectal cancer || id:ukb-saige-153	OLFM4	Weighted mode	3	-0.0172265	0.026031	0.576166	-0.0682473	0.0337942	0.982921	0.934029	1.03437	0.997172
finn-pQTL-R10-v1-PCDHB15	ukb-saige-153	Colorectal cancer || id:ukb-saige-153	PCDHB15	Weighted mode	3	0.0209178	0.046073	0.694329	-0.0693853	0.111221	1.02114	0.932967	1.11764	0.997172
finn-pQTL-R10-v1-PCSK9	ukb-saige-153	Colorectal cancer || id:ukb-saige-153	PCSK9	Weighted mode	4	-0.036171	0.0578033	0.575845	-0.149465	0.0771234	0.964475	0.861168	1.08018	0.997172
finn-pQTL-R10-v1-PDGFRB	ukb-saige-153	Colorectal cancer || id:ukb-saige-153	PDGFRB	Weighted mode	4	0.00333646	0.017378	0.860008	-0.0307243	0.0373973	1.00334	0.969743	1.03811	0.997172
finn-pQTL-R10-v1-PGLYRP2	ukb-saige-153	Colorectal cancer || id:ukb-saige-153	PGLYRP2	Weighted mode	4	-0.0392258	0.0212708	0.162372	-0.0809166	0.00246498	0.961534	0.922271	1.00247	0.997172
finn-pQTL-R10-v1-PILRA	ukb-saige-153	Colorectal cancer || id:ukb-saige-153	PILRA	Weighted mode	3	0.0164569	0.022406	0.539095	-0.0274589	0.0603726	1.01659	0.972915	1.06223	0.997172
finn-pQTL-R10-v1-PILRB	ukb-saige-153	Colorectal cancer || id:ukb-saige-153	PILRB	Weighted mode	4	0.014299	0.0187034	0.500196	-0.0223596	0.0509576	1.0144	0.977888	1.05228	0.997172
finn-pQTL-R10-v1-PLA2G2A	ukb-saige-153	Colorectal cancer || id:ukb-saige-153	PLA2G2A	Weighted mode	5	0.0218977	0.0291585	0.494426	-0.035253	0.0790485	1.02214	0.965361	1.08226	0.997172
finn-pQTL-R10-v1-PLB1	ukb-saige-153	Colorectal cancer || id:ukb-saige-153	PLB1	Weighted mode	3	-0.0735109	0.0775177	0.443065	-0.225446	0.0784238	0.929126	0.798161	1.08158	0.997172
finn-pQTL-R10-v1-PM20D1	ukb-saige-153	Colorectal cancer || id:ukb-saige-153	PM20D1	Weighted mode	3	-0.0268959	0.0583025	0.689882	-0.141169	0.0873769	0.973463	0.868343	1.09131	0.997172
finn-pQTL-R10-v1-PRAP1	ukb-saige-153	Colorectal cancer || id:ukb-saige-153	PRAP1	Weighted mode	3	-0.00896548	0.0485244	0.870454	-0.104073	0.0861423	0.991075	0.901159	1.08996	0.997172
finn-pQTL-R10-v1-PRTG	ukb-saige-153	Colorectal cancer || id:ukb-saige-153	PRTG	Weighted mode	3	-0.0157019	0.0468361	0.769334	-0.107501	0.0760968	0.984421	0.898076	1.07907	0.997172
finn-pQTL-R10-v1-PSCA	ukb-saige-153	Colorectal cancer || id:ukb-saige-153	PSCA	Weighted mode	4	0.0412887	0.0190335	0.118537	0.00398313	0.0785944	1.04215	1.00399	1.08177	0.997172
finn-pQTL-R10-v1-QPCT	ukb-saige-153	Colorectal cancer || id:ukb-saige-153	QPCT	Weighted mode	4	-0.0503694	0.0744899	0.547383	-0.19637	0.0956309	0.950878	0.821708	1.10035	0.997172
finn-pQTL-R10-v1-RARRES1	ukb-saige-153	Colorectal cancer || id:ukb-saige-153	RARRES1	Weighted mode	3	-0.032471	0.0399492	0.501697	-0.110771	0.0458294	0.968051	0.895143	1.0469	0.997172
finn-pQTL-R10-v1-RNASE10	ukb-saige-153	Colorectal cancer || id:ukb-saige-153	RNASE10	Weighted mode	4	0.0227735	0.0274502	0.467596	-0.0310288	0.0765759	1.02303	0.969448	1.07958	0.997172
finn-pQTL-R10-v1-TNXB	ukb-saige-153	Colorectal cancer || id:ukb-saige-153	TNXB	Weighted mode	3	0.148403	0.0701365	0.168604	0.0109352	0.28587	1.15998	1.011	1.33092	0.997172
finn-pQTL-R10-v1-ULBP2	ukb-saige-153	Colorectal cancer || id:ukb-saige-153	ULBP2	Weighted mode	3	-0.00693104	0.042612	0.885739	-0.0904506	0.0765885	0.993093	0.913519	1.0796	0.997172
finn-pQTL-R10-v1-AMN	ukb-saige-153	Colorectal cancer || id:ukb-saige-153	AMN	Inverse variance weighted	2	-9.58e-05	0.0280056	0.99727	-0.0549867	0.0547951	0.999904	0.946498	1.05632	0.997307
finn-pQTL-R10-v1-GLRX	ukb-saige-153	Colorectal cancer || id:ukb-saige-153	GLRX	Inverse variance weighted	2	-0.00126027	0.0511448	0.980341	-0.101504	0.0989836	0.998741	0.903477	1.10405	0.997307
finn-pQTL-R10-v1-HS6ST1	ukb-saige-153	Colorectal cancer || id:ukb-saige-153	HS6ST1	Inverse variance weighted	3	0.000469768	0.0403953	0.990721	-0.078705	0.0796445	1.00047	0.924313	1.0829	0.997307
finn-pQTL-R10-v1-KLB	ukb-saige-153	Colorectal cancer || id:ukb-saige-153	KLB	Inverse variance weighted	3	-0.000589158	0.0264093	0.982202	-0.0523514	0.0511731	0.999411	0.948995	1.05251	0.997307
finn-pQTL-R10-v1-MPO	ukb-saige-153	Colorectal cancer || id:ukb-saige-153	MPO	Inverse variance weighted	2	-0.000490033	0.0696603	0.994387	-0.137024	0.136044	0.99951	0.871949	1.14573	0.997307
finn-pQTL-R10-v1-PM20D1	ukb-saige-153	Colorectal cancer || id:ukb-saige-153	PM20D1	Inverse variance weighted	3	-0.000241267	0.0714861	0.997307	-0.140354	0.139871	0.999759	0.869051	1.15013	0.997307
finn-pQTL-R10-v1-ADGRE5	ukb-saige-153	Colorectal cancer || id:ukb-saige-153	ADGRE5	Wald ratio	1	-0.00289294	0.176791	0.986944	-0.349403	0.343617	0.997111	0.705109	1.41004	0.998936
finn-pQTL-R10-v1-ARG1	ukb-saige-153	Colorectal cancer || id:ukb-saige-153	ARG1	Wald ratio	1	-0.00428636	0.103587	0.966994	-0.207317	0.198744	0.995723	0.812762	1.21987	0.998936
finn-pQTL-R10-v1-BLVRB	ukb-saige-153	Colorectal cancer || id:ukb-saige-153	BLVRB	Wald ratio	1	-0.0031393	0.0913252	0.972578	-0.182137	0.175858	0.996866	0.833487	1.19227	0.998936
finn-pQTL-R10-v1-C1QTNF6	ukb-saige-153	Colorectal cancer || id:ukb-saige-153	C1QTNF6	Wald ratio	1	-0.00955694	0.105126	0.927565	-0.215605	0.196491	0.990489	0.806054	1.21712	0.998936
finn-pQTL-R10-v1-CA4	ukb-saige-153	Colorectal cancer || id:ukb-saige-153	CA4	Wald ratio	1	-0.00535432	0.0997011	0.957171	-0.200768	0.19006	0.99466	0.818102	1.20932	0.998936
finn-pQTL-R10-v1-CDH5	ukb-saige-153	Colorectal cancer || id:ukb-saige-153	CDH5	Wald ratio	1	-0.00744377	0.113275	0.947605	-0.229462	0.214575	0.992584	0.794961	1.23933	0.998936
finn-pQTL-R10-v1-CXCL6	ukb-saige-153	Colorectal cancer || id:ukb-saige-153	CXCL6	Wald ratio	1	-0.00193664	0.0484159	0.968093	-0.0968318	0.0929586	0.998065	0.907709	1.09742	0.998936
finn-pQTL-R10-v1-DNM1	ukb-saige-153	Colorectal cancer || id:ukb-saige-153	DNM1	Wald ratio	1	0.00662063	0.0951715	0.94454	-0.179916	0.193157	1.00664	0.835341	1.21307	0.998936
finn-pQTL-R10-v1-EFCAB2	ukb-saige-153	Colorectal cancer || id:ukb-saige-153	EFCAB2	Wald ratio	1	0.00133551	0.0947777	0.988757	-0.184429	0.1871	1.00134	0.831579	1.20575	0.998936
finn-pQTL-R10-v1-EGFL7	ukb-saige-153	Colorectal cancer || id:ukb-saige-153	EGFL7	Wald ratio	1	0.00066221	0.115167	0.995412	-0.225065	0.226389	1.00066	0.798464	1.25406	0.998936
finn-pQTL-R10-v1-EPHB4	ukb-saige-153	Colorectal cancer || id:ukb-saige-153	EPHB4	Wald ratio	1	0.00853637	0.0943494	0.927909	-0.176388	0.193461	1.00857	0.838292	1.21344	0.998936
finn-pQTL-R10-v1-FGFBP3	ukb-saige-153	Colorectal cancer || id:ukb-saige-153	FGFBP3	Wald ratio	1	0.00261629	0.0401165	0.948001	-0.0760121	0.0812447	1.00262	0.926805	1.08464	0.998936
finn-pQTL-R10-v1-GALNT10	ukb-saige-153	Colorectal cancer || id:ukb-saige-153	GALNT10	Wald ratio	1	-0.00207571	0.0475683	0.965194	-0.0953096	0.0911581	0.997926	0.909091	1.09544	0.998936
finn-pQTL-R10-v1-GNPDA2	ukb-saige-153	Colorectal cancer || id:ukb-saige-153	GNPDA2	Wald ratio	1	-0.00292243	0.0520955	0.955264	-0.10503	0.0991848	0.997082	0.900298	1.10427	0.998936
finn-pQTL-R10-v1-IL18R1	ukb-saige-153	Colorectal cancer || id:ukb-saige-153	IL18R1	Wald ratio	1	-0.00322117	0.0991129	0.974073	-0.197483	0.19104	0.996784	0.820794	1.21051	0.998936
finn-pQTL-R10-v1-IL31RA	ukb-saige-153	Colorectal cancer || id:ukb-saige-153	IL31RA	Wald ratio	1	-0.000423258	0.0335688	0.98994	-0.066218	0.0653715	0.999577	0.935927	1.06756	0.998936
finn-pQTL-R10-v1-IL34	ukb-saige-153	Colorectal cancer || id:ukb-saige-153	IL34	Wald ratio	1	-3.34e-05	0.0250246	0.998936	-0.0490817	0.0490149	0.999967	0.952103	1.05024	0.998936
finn-pQTL-R10-v1-LGMN	ukb-saige-153	Colorectal cancer || id:ukb-saige-153	LGMN	Wald ratio	1	0.00139075	0.0860525	0.987105	-0.167272	0.170054	1.00139	0.845969	1.18537	0.998936
finn-pQTL-R10-v1-MASP1	ukb-saige-153	Colorectal cancer || id:ukb-saige-153	MASP1	Wald ratio	1	-0.0028361	0.0893565	0.97468	-0.177975	0.172303	0.997168	0.836964	1.18804	0.998936
finn-pQTL-R10-v1-MMP1	ukb-saige-153	Colorectal cancer || id:ukb-saige-153	MMP1	Wald ratio	1	0.000464393	0.060098	0.993835	-0.117328	0.118256	1.00046	0.889294	1.12553	0.998936
finn-pQTL-R10-v1-MSR1	ukb-saige-153	Colorectal cancer || id:ukb-saige-153	MSR1	Wald ratio	1	-0.00666642	0.0749036	0.929082	-0.153477	0.140145	0.993356	0.85772	1.15044	0.998936
finn-pQTL-R10-v1-NAGK	ukb-saige-153	Colorectal cancer || id:ukb-saige-153	NAGK	Wald ratio	1	-0.000868689	0.060545	0.988552	-0.119537	0.117799	0.999132	0.887331	1.12502	0.998936
finn-pQTL-R10-v1-NCR1	ukb-saige-153	Colorectal cancer || id:ukb-saige-153	NCR1	Wald ratio	1	-0.00772913	0.132143	0.953358	-0.26673	0.251272	0.992301	0.76588	1.28566	0.998936
finn-pQTL-R10-v1-NPHS1	ukb-saige-153	Colorectal cancer || id:ukb-saige-153	NPHS1	Wald ratio	1	0.00170722	0.0455259	0.970086	-0.0875236	0.0909381	1.00171	0.916197	1.0952	0.998936
finn-pQTL-R10-v1-NPTX1	ukb-saige-153	Colorectal cancer || id:ukb-saige-153	NPTX1	Wald ratio	1	-0.00327557	0.0484784	0.94613	-0.0982933	0.0917422	0.99673	0.906383	1.09608	0.998936
finn-pQTL-R10-v1-PENK	ukb-saige-153	Colorectal cancer || id:ukb-saige-153	PENK	Wald ratio	1	0.00417624	0.0674623	0.950639	-0.12805	0.136402	1.00418	0.87981	1.14614	0.998936
finn-pQTL-R10-v1-PER3	ukb-saige-153	Colorectal cancer || id:ukb-saige-153	PER3	Wald ratio	1	0.000676742	0.093052	0.994197	-0.181705	0.183059	1.00068	0.833847	1.20088	0.998936
finn-pQTL-R10-v1-PON1	ukb-saige-153	Colorectal cancer || id:ukb-saige-153	PON1	Wald ratio	1	0.000393309	0.120178	0.997389	-0.235155	0.235941	1.00039	0.790448	1.2661	0.998936
finn-pQTL-R10-v1-PRG3	ukb-saige-153	Colorectal cancer || id:ukb-saige-153	PRG3	Wald ratio	1	0.0111186	0.130247	0.931971	-0.244165	0.266402	1.01118	0.783358	1.30526	0.998936
finn-pQTL-R10-v1-SCARB2	ukb-saige-153	Colorectal cancer || id:ukb-saige-153	SCARB2	Wald ratio	1	-0.00051454	0.0731188	0.994385	-0.143827	0.142798	0.999486	0.866037	1.1535	0.998936
finn-pQTL-R10-v1-SCPEP1	ukb-saige-153	Colorectal cancer || id:ukb-saige-153	SCPEP1	Wald ratio	1	0.00210076	0.0553838	0.969743	-0.106451	0.110653	1.0021	0.899019	1.11701	0.998936
finn-pQTL-R10-v1-SELL	ukb-saige-153	Colorectal cancer || id:ukb-saige-153	SELL	Wald ratio	1	-0.000901184	0.0423005	0.983003	-0.0838101	0.0820078	0.999099	0.919606	1.08546	0.998936
finn-pQTL-R10-v1-SERPINF1	ukb-saige-153	Colorectal cancer || id:ukb-saige-153	SERPINF1	Wald ratio	1	0.000998631	0.0578155	0.986219	-0.11232	0.114317	1.001	0.893758	1.12111	0.998936
finn-pQTL-R10-v1-SMPDL3A	ukb-saige-153	Colorectal cancer || id:ukb-saige-153	SMPDL3A	Wald ratio	1	0.00244388	0.0315668	0.93829	-0.059427	0.0643148	1.00245	0.942304	1.06643	0.998936
finn-pQTL-R10-v1-SPAG1	ukb-saige-153	Colorectal cancer || id:ukb-saige-153	SPAG1	Wald ratio	1	0.0025796	0.0416705	0.950639	-0.0790945	0.0842537	1.00258	0.923953	1.0879	0.998936
finn-pQTL-R10-v1-SUSD5	ukb-saige-153	Colorectal cancer || id:ukb-saige-153	SUSD5	Wald ratio	1	0.00359074	0.0491364	0.941745	-0.0927167	0.0998981	1.0036	0.911452	1.10506	0.998936
finn-pQTL-R10-v1-TMPRSS5	ukb-saige-153	Colorectal cancer || id:ukb-saige-153	TMPRSS5	Wald ratio	1	0.00184004	0.028915	0.94926	-0.0548333	0.0585134	1.00184	0.946643	1.06026	0.998936
finn-pQTL-R10-v1-TREML2	ukb-saige-153	Colorectal cancer || id:ukb-saige-153	TREML2	Wald ratio	1	0.00169992	0.0418441	0.967595	-0.0803146	0.0837144	1.0017	0.922826	1.08732	0.998936
finn-pQTL-R10-v1-VCAN	ukb-saige-153	Colorectal cancer || id:ukb-saige-153	VCAN	Wald ratio	1	0.00390614	0.0966468	0.967761	-0.185522	0.193334	1.00391	0.830671	1.21329	0.998936
finn-pQTL-R10-v1-WFIKKN2	ukb-saige-153	Colorectal cancer || id:ukb-saige-153	WFIKKN2	Wald ratio	1	-0.000258734	0.0330605	0.993756	-0.0650573	0.0645399	0.999741	0.937014	1.06667	0.998936

## Sheet: FinnGen Somascan
id.exposure	id.outcome	outcome	exposure	method	nsnp	b	se	pval	lo_ci	up_ci	or	or_lci95	or_uci95	p_fdr
finn-pQTL-s-R10-seq_18878_15	ukb-saige-153	Colorectal cancer || id:ukb-saige-153	GREM1	Wald ratio	1	0.169097	0.0285351	3.11e-09	0.113168	0.225026	1.18424	1.11982	1.25236	2.25e-06
finn-pQTL-s-R10-seq_2730_58	ukb-saige-153	Colorectal cancer || id:ukb-saige-153	MICA	Weighted median	3	0.0577856	0.0198361	0.00357803	0.0189068	0.0966644	1.05949	1.01909	1.10149	0.0465144
finn-pQTL-s-R10-seq_4192_10	ukb-saige-153	Colorectal cancer || id:ukb-saige-153	AKR1A1	Inverse variance weighted	2	0.124503	0.0356795	0.000483973	0.0545709	0.194435	1.13259	1.05609	1.21462	0.07066
finn-pQTL-s-R10-seq_2730_58	ukb-saige-153	Colorectal cancer || id:ukb-saige-153	MICA	Inverse variance weighted	3	0.0619997	0.0188042	0.000976814	0.0251435	0.0988559	1.06396	1.02546	1.10391	0.0713074
finn-pQTL-s-R10-seq_3054_3	ukb-saige-153	Colorectal cancer || id:ukb-saige-153	HP	Weighted median	3	-0.0718991	0.0308136	0.0196295	-0.132294	-0.0115044	0.930625	0.876084	0.988561	0.127592
finn-pQTL-s-R10-seq_10892_8	ukb-saige-153	Colorectal cancer || id:ukb-saige-153	OSMR	Wald ratio	1	0.171532	0.0531509	0.00124976	0.0673567	0.275708	1.18712	1.06968	1.31746	0.302443
finn-pQTL-s-R10-seq_4541_49	ukb-saige-153	Colorectal cancer || id:ukb-saige-153	CDON	Wald ratio	1	-0.160733	0.0482198	0.000858121	-0.255243	-0.0662218	0.85152	0.774728	0.935923	0.302443
finn-pQTL-s-R10-seq_4459_68	ukb-saige-153	Colorectal cancer || id:ukb-saige-153	PCSK7	Weighted median	3	-0.0324099	0.0238371	0.173945	-0.0791307	0.0143109	0.96811	0.923919	1.01441	0.452256
finn-pQTL-s-R10-seq_5698_60	ukb-saige-153	Colorectal cancer || id:ukb-saige-153	TNXB	Weighted median	3	0.0557486	0.0404051	0.167666	-0.0234453	0.134943	1.05733	0.976827	1.14447	0.452256
finn-pQTL-s-R10-seq_8960_3	ukb-saige-153	Colorectal cancer || id:ukb-saige-153	ERAP2	Weighted median	3	-0.029203	0.0196101	0.13644	-0.0676388	0.00923287	0.971219	0.934598	1.00928	0.452256
finn-pQTL-s-R10-seq_3054_3	ukb-saige-153	Colorectal cancer || id:ukb-saige-153	HP	Inverse variance weighted	3	-0.0726504	0.0298434	0.0149171	-0.131143	-0.0141573	0.929926	0.877092	0.985942	0.486172
finn-pQTL-s-R10-seq_3803_10	ukb-saige-153	Colorectal cancer || id:ukb-saige-153	CST5	Inverse variance weighted	2	-0.0908219	0.0355253	0.0105718	-0.160451	-0.0211923	0.91318	0.851759	0.979031	0.486172
finn-pQTL-s-R10-seq_7905_30	ukb-saige-153	Colorectal cancer || id:ukb-saige-153	HP	Inverse variance weighted	2	-0.0737733	0.0308114	0.0166497	-0.134164	-0.013383	0.928882	0.874447	0.986706	0.486172
finn-pQTL-s-R10-seq_5584_21	ukb-saige-153	Colorectal cancer || id:ukb-saige-153	TCN2	Weighted median	3	0.0323625	0.0291212	0.266437	-0.024715	0.0894401	1.03289	0.975588	1.09356	0.494811
finn-pQTL-s-R10-seq_5648_28	ukb-saige-153	Colorectal cancer || id:ukb-saige-153	CTRB2	Weighted median	3	-0.0364456	0.0317353	0.250794	-0.0986468	0.0257557	0.964211	0.906063	1.02609	0.494811
finn-pQTL-s-R10-seq_15526_33	ukb-saige-153	Colorectal cancer || id:ukb-saige-153	GSS	Wald ratio	1	-0.260146	0.0891928	0.00353794	-0.434964	-0.0853278	0.770939	0.647288	0.918211	0.533657
finn-pQTL-s-R10-seq_20526_3	ukb-saige-153	Colorectal cancer || id:ukb-saige-153	RAET1L	Wald ratio	1	-0.0958521	0.0329983	0.00367533	-0.160529	-0.0311755	0.908598	0.851693	0.969305	0.533657
finn-pQTL-s-R10-seq_21797_4	ukb-saige-153	Colorectal cancer || id:ukb-saige-153	HLA-C	Weighted median	3	0.016692	0.0184627	0.365946	-0.0194949	0.0528788	1.01683	0.980694	1.0543	0.594662
finn-pQTL-s-R10-seq_13710_6	ukb-saige-153	Colorectal cancer || id:ukb-saige-153	SERPING1	Inverse variance weighted	2	0.0481943	0.0216317	0.0258837	0.00579626	0.0905924	1.04937	1.00581	1.09482	0.609071
finn-pQTL-s-R10-seq_18831_6	ukb-saige-153	Colorectal cancer || id:ukb-saige-153	LRIG1	Inverse variance weighted	2	0.0637024	0.0292113	0.029202	0.00644834	0.120957	1.06578	1.00647	1.12858	0.609071
finn-pQTL-s-R10-seq_20087_3	ukb-saige-153	Colorectal cancer || id:ukb-saige-153	SELENOF	Wald ratio	1	-0.167638	0.0605922	0.00566326	-0.286399	-0.0488777	0.845659	0.750963	0.952298	0.685255
finn-pQTL-s-R10-seq_15584_9	ukb-saige-153	Colorectal cancer || id:ukb-saige-153	CFHR2	Weighted median	3	0.0105526	0.0257863	0.682369	-0.0399885	0.0610936	1.01061	0.960801	1.063	0.685299
finn-pQTL-s-R10-seq_15615_8	ukb-saige-153	Colorectal cancer || id:ukb-saige-153	LILRB3	Weighted median	3	0.0166225	0.0292088	0.569294	-0.0406267	0.0738716	1.01676	0.960187	1.07667	0.685299
finn-pQTL-s-R10-seq_24215_8	ukb-saige-153	Colorectal cancer || id:ukb-saige-153	PRRX1	Weighted median	3	-0.0131115	0.0235823	0.57822	-0.0593328	0.0331099	0.986974	0.942393	1.03366	0.685299
finn-pQTL-s-R10-seq_6247_9	ukb-saige-153	Colorectal cancer || id:ukb-saige-153	SIRPB1	Weighted median	3	-0.0102927	0.0253989	0.685299	-0.0600745	0.0394891	0.98976	0.941694	1.04028	0.685299
finn-pQTL-s-R10-seq_9409_11	ukb-saige-153	Colorectal cancer || id:ukb-saige-153	TPSAB1	Weighted median	3	0.0211892	0.0404299	0.600211	-0.0580534	0.100432	1.02142	0.9436	1.10565	0.685299
finn-pQTL-s-R10-seq_11142_11	ukb-saige-153	Colorectal cancer || id:ukb-saige-153	ANGPTL1	Inverse variance weighted	2	0.0738331	0.0355813	0.0379814	0.00409382	0.143572	1.07663	1.0041	1.15439	0.69316
finn-pQTL-s-R10-seq_15584_9	ukb-saige-153	Colorectal cancer || id:ukb-saige-153	CFHR2	Weighted mode	3	0.0146698	0.0296817	0.670087	-0.0435062	0.0728459	1.01478	0.957427	1.07556	0.702245
finn-pQTL-s-R10-seq_15615_8	ukb-saige-153	Colorectal cancer || id:ukb-saige-153	LILRB3	Weighted mode	3	0.0232162	0.0326989	0.551324	-0.0408736	0.0873061	1.02349	0.95995	1.09123	0.702245
finn-pQTL-s-R10-seq_21797_4	ukb-saige-153	Colorectal cancer || id:ukb-saige-153	HLA-C	Weighted mode	3	0.00937189	0.0175079	0.645999	-0.0249436	0.0436874	1.00942	0.975365	1.04466	0.702245
finn-pQTL-s-R10-seq_24215_8	ukb-saige-153	Colorectal cancer || id:ukb-saige-153	PRRX1	Weighted mode	3	-0.0142266	0.022918	0.598072	-0.0591459	0.0306927	0.985874	0.942569	1.03117	0.702245
finn-pQTL-s-R10-seq_2730_58	ukb-saige-153	Colorectal cancer || id:ukb-saige-153	MICA	Weighted mode	3	0.0578137	0.0195169	0.0975681	0.0195607	0.0960668	1.05952	1.01975	1.10083	0.702245
finn-pQTL-s-R10-seq_3054_3	ukb-saige-153	Colorectal cancer || id:ukb-saige-153	HP	Weighted mode	3	-0.0723229	0.031294	0.147028	-0.133659	-0.0109868	0.93023	0.874888	0.989073	0.702245
finn-pQTL-s-R10-seq_4459_68	ukb-saige-153	Colorectal cancer || id:ukb-saige-153	PCSK7	Weighted mode	3	-0.0308024	0.0238087	0.325018	-0.0774675	0.0158628	0.969667	0.925457	1.01599	0.702245
finn-pQTL-s-R10-seq_5584_21	ukb-saige-153	Colorectal cancer || id:ukb-saige-153	TCN2	Weighted mode	3	0.0342477	0.0309186	0.383382	-0.0263527	0.0948481	1.03484	0.973991	1.09949	0.702245
finn-pQTL-s-R10-seq_5648_28	ukb-saige-153	Colorectal cancer || id:ukb-saige-153	CTRB2	Weighted mode	3	-0.0316786	0.0341662	0.45171	-0.0986444	0.0352872	0.968818	0.906065	1.03592	0.702245
finn-pQTL-s-R10-seq_5698_60	ukb-saige-153	Colorectal cancer || id:ukb-saige-153	TNXB	Weighted mode	3	0.0552267	0.0414656	0.314406	-0.026046	0.136499	1.05678	0.97429	1.14625	0.702245
finn-pQTL-s-R10-seq_6247_9	ukb-saige-153	Colorectal cancer || id:ukb-saige-153	SIRPB1	Weighted mode	3	-0.0115554	0.026197	0.702245	-0.0629015	0.0397907	0.988511	0.939036	1.04059	0.702245
finn-pQTL-s-R10-seq_8960_3	ukb-saige-153	Colorectal cancer || id:ukb-saige-153	ERAP2	Weighted mode	3	-0.0239978	0.019486	0.343278	-0.0621903	0.0141947	0.976288	0.939704	1.0143	0.702245
finn-pQTL-s-R10-seq_9409_11	ukb-saige-153	Colorectal cancer || id:ukb-saige-153	TPSAB1	Weighted mode	3	0.031752	0.0484259	0.579373	-0.0631629	0.126667	1.03226	0.938791	1.13504	0.702245
finn-pQTL-s-R10-seq_11117_2	ukb-saige-153	Colorectal cancer || id:ukb-saige-153	SPATA20	Wald ratio	1	-0.0790643	0.0322114	0.0141063	-0.142199	-0.01593	0.92398	0.867449	0.984196	0.726562
finn-pQTL-s-R10-seq_11257_1	ukb-saige-153	Colorectal cancer || id:ukb-saige-153	QDPR	Wald ratio	1	-0.133613	0.0534453	0.0124193	-0.238366	-0.0288605	0.874928	0.787914	0.971552	0.726562
finn-pQTL-s-R10-seq_13686_2	ukb-saige-153	Colorectal cancer || id:ukb-saige-153	IL5RA	Wald ratio	1	-0.12551	0.0497711	0.0116776	-0.223061	-0.0279583	0.882047	0.800066	0.972429	0.726562
finn-pQTL-s-R10-seq_13707_27	ukb-saige-153	Colorectal cancer || id:ukb-saige-153	SPARCL1	Wald ratio	1	0.100833	0.043214	0.0196307	0.0161332	0.185532	1.10609	1.01626	1.20386	0.726562
finn-pQTL-s-R10-seq_14079_14	ukb-saige-153	Colorectal cancer || id:ukb-saige-153	IL18R1	Wald ratio	1	-0.0776233	0.0336368	0.0210163	-0.143551	-0.0116952	0.925313	0.866276	0.988373	0.726562
finn-pQTL-s-R10-seq_15686_49	ukb-saige-153	Colorectal cancer || id:ukb-saige-153	INHBC	Wald ratio	1	-0.0485221	0.0202175	0.0163951	-0.0881485	-0.00889572	0.952636	0.915625	0.991144	0.726562
finn-pQTL-s-R10-seq_16296_43	ukb-saige-153	Colorectal cancer || id:ukb-saige-153	LGR5	Wald ratio	1	-0.17575	0.0703001	0.0124193	-0.313538	-0.037962	0.838827	0.730856	0.962749	0.726562
finn-pQTL-s-R10-seq_16818_200	ukb-saige-153	Colorectal cancer || id:ukb-saige-153	CDCP1	Wald ratio	1	-0.170236	0.0715484	0.0173451	-0.310471	-0.030001	0.843466	0.733102	0.970445	0.726562
finn-pQTL-s-R10-seq_19367_34	ukb-saige-153	Colorectal cancer || id:ukb-saige-153	ECI1	Wald ratio	1	0.208751	0.0864825	0.0157874	0.0392452	0.378257	1.23214	1.04003	1.45974	0.726562
finn-pQTL-s-R10-seq_23541_61	ukb-saige-153	Colorectal cancer || id:ukb-saige-153	CLYBL	Wald ratio	1	0.191609	0.0811902	0.0182749	0.0324761	0.350742	1.2112	1.03301	1.42012	0.726562
finn-pQTL-s-R10-seq_3446_7	ukb-saige-153	Colorectal cancer || id:ukb-saige-153	IL18R1	Wald ratio	1	-0.0624046	0.027042	0.0210163	-0.115407	-0.00940229	0.939503	0.891004	0.990642	0.726562
finn-pQTL-s-R10-seq_4467_49	ukb-saige-153	Colorectal cancer || id:ukb-saige-153	SPARCL1	Wald ratio	1	0.0846858	0.0362939	0.0196307	0.0135497	0.155822	1.08838	1.01364	1.16862	0.726562
finn-pQTL-s-R10-seq_4479_14	ukb-saige-153	Colorectal cancer || id:ukb-saige-153	SERPING1	Wald ratio	1	-0.0737709	0.0316161	0.0196307	-0.135738	-0.0118033	0.928884	0.873071	0.988266	0.726562
finn-pQTL-s-R10-seq_8794_13	ukb-saige-153	Colorectal cancer || id:ukb-saige-153	DPEP1	Wald ratio	1	0.10722	0.0445065	0.0159923	0.0199875	0.194453	1.11318	1.02019	1.21465	0.726562
finn-pQTL-s-R10-seq_9580_5	ukb-saige-153	Colorectal cancer || id:ukb-saige-153	LAMC2	Wald ratio	1	-0.0807764	0.0340111	0.017549	-0.147438	-0.0141146	0.9224	0.862916	0.985985	0.726562
finn-pQTL-s-R10-seq_12549_33	ukb-saige-153	Colorectal cancer || id:ukb-saige-153	HPGDS	Wald ratio	1	0.0890553	0.0391843	0.0230426	0.012254	0.165857	1.09314	1.01233	1.1804	0.727345
finn-pQTL-s-R10-seq_18380_78	ukb-saige-153	Colorectal cancer || id:ukb-saige-153	ALB	Wald ratio	1	-0.220392	0.0969725	0.0230426	-0.410458	-0.030326	0.802204	0.663346	0.970129	0.727345
finn-pQTL-s-R10-seq_10442_1	ukb-saige-153	Colorectal cancer || id:ukb-saige-153	TMEM190	Wald ratio	1	0.0459394	0.0209723	0.0284897	0.00483362	0.0870451	1.04701	1.00485	1.09095	0.734071
finn-pQTL-s-R10-seq_10746_24	ukb-saige-153	Colorectal cancer || id:ukb-saige-153	DKK3	Wald ratio	1	-0.160837	0.0804185	0.0455003	-0.318457	-0.00321674	0.851431	0.72727	0.996788	0.734071
finn-pQTL-s-R10-seq_13123_3	ukb-saige-153	Colorectal cancer || id:ukb-saige-153	FLRT3	Wald ratio	1	-0.0566783	0.0277835	0.0413503	-0.111134	-0.00222268	0.944898	0.894819	0.99778	0.734071
finn-pQTL-s-R10-seq_13954_9	ukb-saige-153	Colorectal cancer || id:ukb-saige-153	GNPNAT1	Wald ratio	1	-0.167677	0.0784873	0.0326498	-0.321513	-0.0138423	0.845627	0.725051	0.986253	0.734071
finn-pQTL-s-R10-seq_16823_75	ukb-saige-153	Colorectal cancer || id:ukb-saige-153	APOL3	Wald ratio	1	-0.0553848	0.0258462	0.0321246	-0.106043	-0.00472617	0.946121	0.899386	0.995285	0.734071
finn-pQTL-s-R10-seq_18185_118	ukb-saige-153	Colorectal cancer || id:ukb-saige-153	ALDOB	Wald ratio	1	0.192029	0.0960147	0.0455003	0.00384059	0.380218	1.21171	1.00385	1.4626	0.734071
finn-pQTL-s-R10-seq_21696_80	ukb-saige-153	Colorectal cancer || id:ukb-saige-153	LRFN4	Wald ratio	1	-0.0728572	0.0342858	0.0335866	-0.140057	-0.00565715	0.929734	0.869308	0.994359	0.734071
finn-pQTL-s-R10-seq_23605_3	ukb-saige-153	Colorectal cancer || id:ukb-saige-153	TCP11L1	Wald ratio	1	0.15019	0.0704972	0.0331357	0.0120152	0.288364	1.16205	1.01209	1.33424	0.734071
finn-pQTL-s-R10-seq_24216_30	ukb-saige-153	Colorectal cancer || id:ukb-saige-153	AAMDC	Wald ratio	1	0.091193	0.0409199	0.0258424	0.0109899	0.171396	1.09548	1.01105	1.18696	0.734071
finn-pQTL-s-R10-seq_24472_28	ukb-saige-153	Colorectal cancer || id:ukb-saige-153	SHARPIN	Wald ratio	1	0.138795	0.0678553	0.0408101	0.00579854	0.271791	1.14889	1.00582	1.31231	0.734071
finn-pQTL-s-R10-seq_25464_1	ukb-saige-153	Colorectal cancer || id:ukb-saige-153	CYP2C19	Wald ratio	1	-0.133367	0.0631739	0.0347628	-0.257188	-0.00954627	0.875144	0.773223	0.990499	0.734071
finn-pQTL-s-R10-seq_2948_58	ukb-saige-153	Colorectal cancer || id:ukb-saige-153	GHR	Wald ratio	1	0.14991	0.074955	0.0455003	0.0029982	0.296822	1.16173	1.003	1.34558	0.734071
finn-pQTL-s-R10-seq_3324_51	ukb-saige-153	Colorectal cancer || id:ukb-saige-153	LY9	Wald ratio	1	-0.131892	0.0601611	0.0283573	-0.249807	-0.0139759	0.876436	0.778951	0.986121	0.734071
finn-pQTL-s-R10-seq_3488_64	ukb-saige-153	Colorectal cancer || id:ukb-saige-153	CAT	Wald ratio	1	0.135548	0.0605639	0.0252148	0.0168425	0.254253	1.14516	1.01699	1.2895	0.734071
finn-pQTL-s-R10-seq_3607_71	ukb-saige-153	Colorectal cancer || id:ukb-saige-153	DKK3	Wald ratio	1	-0.147469	0.0737345	0.0455003	-0.291989	-0.00294938	0.862889	0.746777	0.997055	0.734071
finn-pQTL-s-R10-seq_4491_4	ukb-saige-153	Colorectal cancer || id:ukb-saige-153	IL5RA	Wald ratio	1	-0.0909095	0.0419582	0.0302603	-0.173148	-0.00867137	0.9131	0.841013	0.991366	0.734071
finn-pQTL-s-R10-seq_4548_4	ukb-saige-153	Colorectal cancer || id:ukb-saige-153	FUT3	Wald ratio	1	-0.0648806	0.0305321	0.0335866	-0.124723	-0.00503779	0.937179	0.882741	0.994975	0.734071
finn-pQTL-s-R10-seq_5090_49	ukb-saige-153	Colorectal cancer || id:ukb-saige-153	LILRB1	Wald ratio	1	0.0666676	0.0326671	0.0412691	0.00264004	0.130695	1.06894	1.00264	1.13962	0.734071
finn-pQTL-s-R10-seq_5731_1	ukb-saige-153	Colorectal cancer || id:ukb-saige-153	SPINK6	Wald ratio	1	0.0918322	0.0437805	0.0359439	0.00602248	0.177642	1.09618	1.00604	1.1944	0.734071
finn-pQTL-s-R10-seq_8851_42	ukb-saige-153	Colorectal cancer || id:ukb-saige-153	FAM171B	Wald ratio	1	-0.113859	0.0569293	0.0455003	-0.22544	-0.00227717	0.892384	0.798165	0.997725	0.734071
finn-pQTL-s-R10-seq_9177_6	ukb-saige-153	Colorectal cancer || id:ukb-saige-153	FAM3B	Wald ratio	1	0.0832622	0.0402434	0.0385493	0.00438514	0.162139	1.08683	1.00439	1.17602	0.734071
finn-pQTL-s-R10-seq_9328_55	ukb-saige-153	Colorectal cancer || id:ukb-saige-153	MICB	Wald ratio	1	-0.0633033	0.0306306	0.0387656	-0.123339	-0.00326727	0.938659	0.883964	0.996738	0.734071
finn-pQTL-s-R10-seq_16828_8	ukb-saige-153	Colorectal cancer || id:ukb-saige-153	COL6A1	Wald ratio	1	-0.0375557	0.0191951	0.0504037	-0.0751782	6.68e-05	0.963141	0.927578	1.00007	0.765881
finn-pQTL-s-R10-seq_19143_38	ukb-saige-153	Colorectal cancer || id:ukb-saige-153	CYB5R2	Wald ratio	1	-0.089414	0.0457467	0.0506367	-0.179078	0.000249527	0.914467	0.836041	1.00025	0.765881
finn-pQTL-s-R10-seq_4982_54	ukb-saige-153	Colorectal cancer || id:ukb-saige-153	PI3	Wald ratio	1	0.163117	0.0830974	0.0496505	0.000246214	0.325988	1.17717	1.00025	1.3854	0.765881
finn-pQTL-s-R10-seq_10479_18	ukb-saige-153	Colorectal cancer || id:ukb-saige-153	MMP10	Wald ratio	1	0.105964	0.0577983	0.066753	-0.00732112	0.219248	1.11178	0.992706	1.24514	0.766445
finn-pQTL-s-R10-seq_16060_99	ukb-saige-153	Colorectal cancer || id:ukb-saige-153	NID2	Wald ratio	1	0.0794776	0.0439218	0.0703697	-0.00660919	0.165564	1.08272	0.993413	1.18006	0.766445
finn-pQTL-s-R10-seq_21108_5	ukb-saige-153	Colorectal cancer || id:ukb-saige-153	CPPED1	Wald ratio	1	-0.0414036	0.0222942	0.0632908	-0.0851003	0.00229312	0.959442	0.91842	1.0023	0.766445
finn-pQTL-s-R10-seq_22381_1	ukb-saige-153	Colorectal cancer || id:ukb-saige-153	LACTB2	Wald ratio	1	0.0712217	0.0395676	0.0718606	-0.00633082	0.148774	1.07382	0.993689	1.16041	0.766445
finn-pQTL-s-R10-seq_22586_24	ukb-saige-153	Colorectal cancer || id:ukb-saige-153	BTN2A2	Wald ratio	1	0.0498928	0.0279162	0.0738997	-0.00482297	0.104609	1.05116	0.995189	1.11028	0.766445
finn-pQTL-s-R10-seq_2994_71	ukb-saige-153	Colorectal cancer || id:ukb-saige-153	IL1RL2	Wald ratio	1	-0.130589	0.0708278	0.0652196	-0.269411	0.00823373	0.877579	0.763829	1.00827	0.766445
finn-pQTL-s-R10-seq_3310_62	ukb-saige-153	Colorectal cancer || id:ukb-saige-153	FCGR2B	Wald ratio	1	-0.121061	0.0675689	0.0731864	-0.253496	0.0113741	0.88598	0.776083	1.01144	0.766445
finn-pQTL-s-R10-seq_3613_62	ukb-saige-153	Colorectal cancer || id:ukb-saige-153	FCN1	Wald ratio	1	0.10568	0.0563625	0.0607927	-0.00479081	0.21615	1.11147	0.995221	1.24129	0.766445
finn-pQTL-s-R10-seq_5080_131	ukb-saige-153	Colorectal cancer || id:ukb-saige-153	GPNMB	Wald ratio	1	0.183119	0.10042	0.0682232	-0.0137044	0.379942	1.20096	0.986389	1.4622	0.766445
finn-pQTL-s-R10-seq_5456_59	ukb-saige-153	Colorectal cancer || id:ukb-saige-153	CNDP1	Wald ratio	1	-0.139722	0.0731879	0.0562504	-0.283171	0.00372593	0.8696	0.753391	1.00373	0.766445
finn-pQTL-s-R10-seq_5618_50	ukb-saige-153	Colorectal cancer || id:ukb-saige-153	FAM3B	Wald ratio	1	0.0765193	0.03979	0.0544704	-0.00146917	0.154508	1.07952	0.998532	1.16708	0.766445
finn-pQTL-s-R10-seq_6086_15	ukb-saige-153	Colorectal cancer || id:ukb-saige-153	CHRDL2	Wald ratio	1	0.102334	0.054911	0.0623728	-0.00529142	0.20996	1.10775	0.994723	1.23363	0.766445
finn-pQTL-s-R10-seq_7161_25	ukb-saige-153	Colorectal cancer || id:ukb-saige-153	H6PD	Wald ratio	1	-0.0921325	0.0484086	0.0570111	-0.187013	0.00274836	0.911984	0.829433	1.00275	0.766445
finn-pQTL-s-R10-seq_7871_16	ukb-saige-153	Colorectal cancer || id:ukb-saige-153	TMEM132A	Wald ratio	1	-0.0734818	0.0384905	0.0562504	-0.148923	0.00195952	0.929153	0.861635	1.00196	0.766445
finn-pQTL-s-R10-seq_7994_41	ukb-saige-153	Colorectal cancer || id:ukb-saige-153	ERO1B	Wald ratio	1	-0.128543	0.0706984	0.0690363	-0.267111	0.0100263	0.879376	0.765588	1.01008	0.766445
finn-pQTL-s-R10-seq_8229_1	ukb-saige-153	Colorectal cancer || id:ukb-saige-153	GXYLT1	Wald ratio	1	-0.11471	0.0592666	0.0529309	-0.230872	0.00145299	0.891625	0.793841	1.00145	0.766445
finn-pQTL-s-R10-seq_8240_207	ukb-saige-153	Colorectal cancer || id:ukb-saige-153	GPNMB	Wald ratio	1	0.182477	0.100068	0.0682232	-0.0136564	0.378611	1.20019	0.986436	1.46026	0.766445
finn-pQTL-s-R10-seq_8289_8	ukb-saige-153	Colorectal cancer || id:ukb-saige-153	GPNMB	Wald ratio	1	0.193387	0.106051	0.0682232	-0.0144729	0.401248	1.21335	0.985631	1.49369	0.766445
finn-pQTL-s-R10-seq_8376_25	ukb-saige-153	Colorectal cancer || id:ukb-saige-153	LHB	Wald ratio	1	0.169044	0.0939132	0.0718606	-0.0150261	0.353114	1.18417	0.985086	1.42349	0.766445
finn-pQTL-s-R10-seq_8479_4	ukb-saige-153	Colorectal cancer || id:ukb-saige-153	MMP10	Wald ratio	1	0.0878338	0.0479094	0.066753	-0.00606852	0.181736	1.09181	0.99395	1.1993	0.766445
finn-pQTL-s-R10-seq_9288_7	ukb-saige-153	Colorectal cancer || id:ukb-saige-153	FKBP7	Wald ratio	1	-0.0829373	0.0457001	0.0695524	-0.17251	0.00663498	0.920409	0.84155	1.00666	0.766445
finn-pQTL-s-R10-seq_9627_15	ukb-saige-153	Colorectal cancer || id:ukb-saige-153	VIT	Wald ratio	1	-0.122117	0.0671641	0.0690363	-0.253758	0.00952509	0.885045	0.775879	1.00957	0.766445
finn-pQTL-s-R10-seq_3376_49	ukb-saige-153	Colorectal cancer || id:ukb-saige-153	IL17RD	Wald ratio	1	0.0484671	0.0275597	0.078642	-0.00554996	0.102484	1.04966	0.994465	1.10792	0.792973
finn-pQTL-s-R10-seq_9026_40	ukb-saige-153	Colorectal cancer || id:ukb-saige-153	BTNL8	Wald ratio	1	-0.0902772	0.0512384	0.0780854	-0.190704	0.0101501	0.913678	0.826377	1.0102	0.792973
finn-pQTL-s-R10-seq_21713_11	ukb-saige-153	Colorectal cancer || id:ukb-saige-153	RELN	Wald ratio	1	0.149683	0.0855334	0.0801183	-0.017962	0.317329	1.16147	0.982198	1.37345	0.796793
finn-pQTL-s-R10-seq_14133_93	ukb-saige-153	Colorectal cancer || id:ukb-saige-153	IL1R2	Wald ratio	1	0.0859544	0.051108	0.0926041	-0.0142173	0.186126	1.08976	0.985883	1.20457	0.797367
finn-pQTL-s-R10-seq_14151_4	ukb-saige-153	Colorectal cancer || id:ukb-saige-153	ISG15	Wald ratio	1	-0.112378	0.0668195	0.0926041	-0.243345	0.018588	0.893706	0.784001	1.01876	0.797367
finn-pQTL-s-R10-seq_15503_15	ukb-saige-153	Colorectal cancer || id:ukb-saige-153	LEFTY2	Wald ratio	1	0.0781194	0.0477396	0.101764	-0.0154503	0.171689	1.08125	0.984668	1.18731	0.797367
finn-pQTL-s-R10-seq_15522_2	ukb-saige-153	Colorectal cancer || id:ukb-saige-153	GLIPR2	Wald ratio	1	-0.849559	0.499116	0.0887314	-1.82783	0.128708	0.427603	0.160763	1.13736	0.797367
finn-pQTL-s-R10-seq_15582_25	ukb-saige-153	Colorectal cancer || id:ukb-saige-153	FCN1	Wald ratio	1	0.0905595	0.0530104	0.0875745	-0.013341	0.19446	1.09479	0.986748	1.21465	0.797367
finn-pQTL-s-R10-seq_18222_34	ukb-saige-153	Colorectal cancer || id:ukb-saige-153	SH3GLB2	Wald ratio	1	0.0919068	0.056766	0.105437	-0.0193545	0.203168	1.09626	0.980832	1.22528	0.797367
finn-pQTL-s-R10-seq_18315_38	ukb-saige-153	Colorectal cancer || id:ukb-saige-153	RTP4	Wald ratio	1	0.0992632	0.0606609	0.101764	-0.0196321	0.218159	1.10436	0.980559	1.24378	0.797367
finn-pQTL-s-R10-seq_2190_55	ukb-saige-153	Colorectal cancer || id:ukb-saige-153	F11	Wald ratio	1	0.0677358	0.0402753	0.0926041	-0.0112039	0.146675	1.07008	0.988859	1.15798	0.797367
finn-pQTL-s-R10-seq_23584_2	ukb-saige-153	Colorectal cancer || id:ukb-saige-153	NUDT15	Wald ratio	1	0.162376	0.0955155	0.0891309	-0.024834	0.349587	1.1763	0.975472	1.41848	0.797367
finn-pQTL-s-R10-seq_2567_5	ukb-saige-153	Colorectal cancer || id:ukb-saige-153	CFI	Wald ratio	1	-0.11825	0.0730369	0.105437	-0.261402	0.0249021	0.888474	0.769971	1.02521	0.797367
finn-pQTL-s-R10-seq_2670_67	ukb-saige-153	Colorectal cancer || id:ukb-saige-153	CKM	Wald ratio	1	0.107645	0.0629311	0.0871686	-0.0156997	0.23099	1.11365	0.984423	1.25985	0.797367
finn-pQTL-s-R10-seq_2851_63	ukb-saige-153	Colorectal cancer || id:ukb-saige-153	C5	Wald ratio	1	-0.0969906	0.0565778	0.0864763	-0.207883	0.013902	0.907565	0.812302	1.014	0.797367
finn-pQTL-s-R10-seq_2974_61	ukb-saige-153	Colorectal cancer || id:ukb-saige-153	CNTN1	Wald ratio	1	-0.12347	0.0734148	0.0926041	-0.267363	0.0204227	0.883848	0.765395	1.02063	0.797367
finn-pQTL-s-R10-seq_3343_1	ukb-saige-153	Colorectal cancer || id:ukb-saige-153	ACY1	Wald ratio	1	-0.155019	0.0941187	0.099546	-0.339492	0.0294536	0.856399	0.712132	1.02989	0.797367
finn-pQTL-s-R10-seq_3676_15	ukb-saige-153	Colorectal cancer || id:ukb-saige-153	IGF2R	Wald ratio	1	0.0622938	0.0378649	0.0999366	-0.0119213	0.136509	1.06427	0.988149	1.14627	0.797367
finn-pQTL-s-R10-seq_4440_15	ukb-saige-153	Colorectal cancer || id:ukb-saige-153	FCRL3	Wald ratio	1	-0.0364346	0.0225037	0.105437	-0.0805419	0.0076727	0.964221	0.922616	1.0077	0.797367
finn-pQTL-s-R10-seq_4920_10	ukb-saige-153	Colorectal cancer || id:ukb-saige-153	LYZ	Wald ratio	1	-0.0509219	0.0305531	0.0955807	-0.110806	0.00896226	0.950353	0.895112	1.009	0.797367
finn-pQTL-s-R10-seq_5728_60	ukb-saige-153	Colorectal cancer || id:ukb-saige-153	FCRL1	Wald ratio	1	-0.0942324	0.0582024	0.105437	-0.208309	0.0198442	0.910071	0.811956	1.02004	0.797367
finn-pQTL-s-R10-seq_6920_1	ukb-saige-153	Colorectal cancer || id:ukb-saige-153	GFRAL	Wald ratio	1	-0.145162	0.0841939	0.0846829	-0.310182	0.0198581	0.864882	0.733314	1.02006	0.797367
finn-pQTL-s-R10-seq_7813_6	ukb-saige-153	Colorectal cancer || id:ukb-saige-153	ALPP	Wald ratio	1	-0.100871	0.0615067	0.101005	-0.221424	0.0196821	0.90405	0.801377	1.01988	0.797367
finn-pQTL-s-R10-seq_9021_1	ukb-saige-153	Colorectal cancer || id:ukb-saige-153	HAVCR1	Wald ratio	1	0.0875461	0.0510685	0.0864763	-0.0125483	0.18764	1.09149	0.98753	1.2064	0.797367
finn-pQTL-s-R10-seq_9216_100	ukb-saige-153	Colorectal cancer || id:ukb-saige-153	PLXNB2	Wald ratio	1	0.0583494	0.035658	0.101764	-0.0115402	0.128239	1.06009	0.988526	1.13682	0.797367
finn-pQTL-s-R10-seq_9312_8	ukb-saige-153	Colorectal cancer || id:ukb-saige-153	AZGP1	Wald ratio	1	0.106658	0.0656358	0.104163	-0.021988	0.235304	1.11255	0.978252	1.26529	0.797367
finn-pQTL-s-R10-seq_13472_35	ukb-saige-153	Colorectal cancer || id:ukb-saige-153	HDHD2	Wald ratio	1	-0.0886802	0.0551255	0.107683	-0.196726	0.0193658	0.915138	0.821415	1.01955	0.802012
finn-pQTL-s-R10-seq_19277_4	ukb-saige-153	Colorectal cancer || id:ukb-saige-153	TSTD1	Wald ratio	1	0.0572683	0.0356576	0.108261	-0.0126206	0.127157	1.05894	0.987459	1.1356	0.802012
finn-pQTL-s-R10-seq_15343_337	ukb-saige-153	Colorectal cancer || id:ukb-saige-153	KNG1	Wald ratio	1	-0.0761315	0.0479347	0.112233	-0.170083	0.0178204	0.926694	0.843594	1.01798	0.806745
finn-pQTL-s-R10-seq_15503_20	ukb-saige-153	Colorectal cancer || id:ukb-saige-153	LEFTY2	Wald ratio	1	0.0489252	0.030753	0.11163	-0.0113506	0.109201	1.05014	0.988714	1.11539	0.806745
finn-pQTL-s-R10-seq_4918_21	ukb-saige-153	Colorectal cancer || id:ukb-saige-153	KNG1	Wald ratio	1	-0.110516	0.0695843	0.112233	-0.246901	0.025869	0.895372	0.781218	1.02621	0.806745
finn-pQTL-s-R10-seq_22961_7	ukb-saige-153	Colorectal cancer || id:ukb-saige-153	FCN1	Wald ratio	1	0.0741834	0.0468527	0.113346	-0.0176478	0.166015	1.077	0.982507	1.18059	0.806753
finn-pQTL-s-R10-seq_3320_49	ukb-saige-153	Colorectal cancer || id:ukb-saige-153	IGFBP7	Wald ratio	1	0.109162	0.069225	0.114813	-0.0265185	0.244843	1.11534	0.97383	1.27742	0.809266
finn-pQTL-s-R10-seq_10974_20	ukb-saige-153	Colorectal cancer || id:ukb-saige-153	SPINK7	Wald ratio	1	-0.109247	0.069521	0.116083	-0.245508	0.0270139	0.896509	0.782307	1.02738	0.810103
finn-pQTL-s-R10-seq_11424_4	ukb-saige-153	Colorectal cancer || id:ukb-saige-153	FAH	Wald ratio	1	0.0689845	0.0442651	0.119129	-0.017775	0.155744	1.07142	0.982382	1.16853	0.810103
finn-pQTL-s-R10-seq_15441_6	ukb-saige-153	Colorectal cancer || id:ukb-saige-153	GM2A	Wald ratio	1	-0.102088	0.0654411	0.11876	-0.230353	0.0261764	0.90295	0.794253	1.02652	0.810103
finn-pQTL-s-R10-seq_24023_35	ukb-saige-153	Colorectal cancer || id:ukb-saige-153	PROCR	Wald ratio	1	-0.0440581	0.0283764	0.120511	-0.0996759	0.0115597	0.956898	0.905131	1.01163	0.810103
finn-pQTL-s-R10-seq_6472_40	ukb-saige-153	Colorectal cancer || id:ukb-saige-153	PMEL	Wald ratio	1	0.113106	0.0728479	0.120511	-0.0296759	0.255888	1.11975	0.97076	1.29161	0.810103
finn-pQTL-s-R10-seq_6081_52	ukb-saige-153	Colorectal cancer || id:ukb-saige-153	PCOLCE2	Wald ratio	1	0.056602	0.0366249	0.122236	-0.0151827	0.128387	1.05823	0.984932	1.13699	0.814161
finn-pQTL-s-R10-seq_5115_31	ukb-saige-153	Colorectal cancer || id:ukb-saige-153	RELT	Wald ratio	1	0.0813991	0.0529094	0.123936	-0.0223033	0.185102	1.0848	0.977944	1.20334	0.817976
finn-pQTL-s-R10-seq_10714_7	ukb-saige-153	Colorectal cancer || id:ukb-saige-153	ACE	Wald ratio	1	-0.0440031	0.0298085	0.139893	-0.102428	0.0144217	0.956951	0.902643	1.01453	0.825709
finn-pQTL-s-R10-seq_10818_36	ukb-saige-153	Colorectal cancer || id:ukb-saige-153	SMPD1	Wald ratio	1	0.106894	0.0703247	0.128511	-0.0309429	0.24473	1.11282	0.969531	1.27728	0.825709
finn-pQTL-s-R10-seq_12436_84	ukb-saige-153	Colorectal cancer || id:ukb-saige-153	GSTO1	Wald ratio	1	0.0418056	0.0282803	0.139338	-0.0136237	0.0972349	1.04269	0.986469	1.10212	0.825709
finn-pQTL-s-R10-seq_16621_77	ukb-saige-153	Colorectal cancer || id:ukb-saige-153	NAXE	Wald ratio	1	-0.068232	0.0450191	0.129614	-0.156469	0.0200053	0.934044	0.855158	1.02021	0.825709
finn-pQTL-s-R10-seq_16758_96	ukb-saige-153	Colorectal cancer || id:ukb-saige-153	HDGF	Wald ratio	1	0.118286	0.0800167	0.139338	-0.0385472	0.275118	1.12557	0.962186	1.31669	0.825709
finn-pQTL-s-R10-seq_21439_37	ukb-saige-153	Colorectal cancer || id:ukb-saige-153	HCLS1	Wald ratio	1	0.116973	0.0790361	0.138873	-0.0379373	0.271884	1.12409	0.962773	1.31244	0.825709
finn-pQTL-s-R10-seq_22831_11	ukb-saige-153	Colorectal cancer || id:ukb-saige-153	ZBP1	Wald ratio	1	-0.0720314	0.048021	0.133614	-0.166153	0.0220896	0.930502	0.846917	1.02234	0.825709
finn-pQTL-s-R10-seq_3024_18	ukb-saige-153	Colorectal cancer || id:ukb-saige-153	SERPINF2	Wald ratio	1	0.0965928	0.0654338	0.139893	-0.0316575	0.224843	1.10141	0.968838	1.25213	0.825709
finn-pQTL-s-R10-seq_3291_30	ukb-saige-153	Colorectal cancer || id:ukb-saige-153	FCER2	Wald ratio	1	-0.108289	0.0733573	0.139893	-0.25207	0.035491	0.897368	0.777191	1.03613	0.825709
finn-pQTL-s-R10-seq_6965_19	ukb-saige-153	Colorectal cancer || id:ukb-saige-153	CNTNAP2	Wald ratio	1	-0.0582161	0.0388107	0.133614	-0.134285	0.0178529	0.943446	0.874341	1.01801	0.825709
finn-pQTL-s-R10-seq_8866_53	ukb-saige-153	Colorectal cancer || id:ukb-saige-153	QPCTL	Wald ratio	1	-0.0832079	0.0546795	0.128074	-0.19038	0.0239639	0.92016	0.826645	1.02425	0.825709
finn-pQTL-s-R10-seq_9297_12	ukb-saige-153	Colorectal cancer || id:ukb-saige-153	B3GNT8	Wald ratio	1	0.0381586	0.0254391	0.133614	-0.011702	0.0880192	1.0389	0.988366	1.09201	0.825709
finn-pQTL-s-R10-seq_9839_148	ukb-saige-153	Colorectal cancer || id:ukb-saige-153	TIRAP	Wald ratio	1	0.0993982	0.0659643	0.131849	-0.0298917	0.228688	1.10451	0.970551	1.25695	0.825709
finn-pQTL-s-R10-seq_25264_102	ukb-saige-153	Colorectal cancer || id:ukb-saige-153	INPP5D	Wald ratio	1	0.107169	0.0731886	0.143116	-0.0362807	0.250619	1.11312	0.96437	1.28482	0.837921
finn-pQTL-s-R10-seq_13747_9	ukb-saige-153	Colorectal cancer || id:ukb-saige-153	CA6	Wald ratio	1	-0.0491645	0.0348909	0.158808	-0.117551	0.0192217	0.952024	0.889095	1.01941	0.854036
finn-pQTL-s-R10-seq_14076_74	ukb-saige-153	Colorectal cancer || id:ukb-saige-153	CST4	Wald ratio	1	0.0863532	0.0599185	0.149535	-0.0310872	0.203794	1.09019	0.969391	1.22605	0.854036
finn-pQTL-s-R10-seq_15376_134	ukb-saige-153	Colorectal cancer || id:ukb-saige-153	CTSE	Wald ratio	1	-0.0753147	0.0527203	0.153127	-0.178646	0.0280171	0.927452	0.836402	1.02841	0.854036
finn-pQTL-s-R10-seq_16057_6	ukb-saige-153	Colorectal cancer || id:ukb-saige-153	IGF2R	Wald ratio	1	0.0637653	0.0443585	0.150576	-0.0231773	0.150708	1.06584	0.977089	1.16266	0.854036
finn-pQTL-s-R10-seq_20948_16	ukb-saige-153	Colorectal cancer || id:ukb-saige-153	NUDT16	Wald ratio	1	0.0929734	0.0656283	0.15658	-0.035658	0.221605	1.09743	0.96497	1.24808	0.854036
finn-pQTL-s-R10-seq_21770_18	ukb-saige-153	Colorectal cancer || id:ukb-saige-153	B3GAT1	Wald ratio	1	-0.0465289	0.032462	0.151763	-0.110154	0.0170967	0.954537	0.895696	1.01724	0.854036
finn-pQTL-s-R10-seq_2913_1	ukb-saige-153	Colorectal cancer || id:ukb-saige-153	CCL23	Wald ratio	1	0.0618351	0.0430157	0.150576	-0.0224757	0.146146	1.06379	0.977775	1.15737	0.854036
finn-pQTL-s-R10-seq_3028_36	ukb-saige-153	Colorectal cancer || id:ukb-saige-153	CCL23	Wald ratio	1	0.0481072	0.0334659	0.150576	-0.0174859	0.1137	1.04928	0.982666	1.12042	0.854036
finn-pQTL-s-R10-seq_3352_80	ukb-saige-153	Colorectal cancer || id:ukb-saige-153	CA6	Wald ratio	1	-0.0480182	0.0340774	0.158808	-0.11481	0.0187736	0.953116	0.891536	1.01895	0.854036
finn-pQTL-s-R10-seq_8265_225	ukb-saige-153	Colorectal cancer || id:ukb-saige-153	TMPO	Wald ratio	1	-0.920416	0.649706	0.15658	-2.19384	0.353007	0.398353	0.111488	1.42334	0.854036
finn-pQTL-s-R10-seq_8463_2	ukb-saige-153	Colorectal cancer || id:ukb-saige-153	SOD3	Wald ratio	1	0.0765061	0.0541007	0.15732	-0.0295313	0.182543	1.07951	0.9709	1.20027	0.854036
finn-pQTL-s-R10-seq_10490_3	ukb-saige-153	Colorectal cancer || id:ukb-saige-153	RPN1	Wald ratio	1	0.0715236	0.0524506	0.172682	-0.0312797	0.174327	1.07414	0.969204	1.19044	0.866307
finn-pQTL-s-R10-seq_11377_19	ukb-saige-153	Colorectal cancer || id:ukb-saige-153	ADH7	Wald ratio	1	-0.0754753	0.0578109	0.191704	-0.188785	0.037834	0.927303	0.827965	1.03856	0.866307
finn-pQTL-s-R10-seq_11516_7	ukb-saige-153	Colorectal cancer || id:ukb-saige-153	FABP1	Wald ratio	1	0.105703	0.081039	0.192115	-0.0531334	0.264539	1.11149	0.948254	1.30283	0.866307
finn-pQTL-s-R10-seq_12517_52	ukb-saige-153	Colorectal cancer || id:ukb-saige-153	PDCD5	Wald ratio	1	0.082975	0.0603455	0.169131	-0.0353021	0.201252	1.08651	0.965314	1.22293	0.866307
finn-pQTL-s-R10-seq_13988_67	ukb-saige-153	Colorectal cancer || id:ukb-saige-153	NMRAL1	Wald ratio	1	0.0825457	0.0619093	0.182422	-0.0387965	0.203888	1.08605	0.961946	1.22616	0.866307
finn-pQTL-s-R10-seq_14636_25	ukb-saige-153	Colorectal cancer || id:ukb-saige-153	RIDA	Wald ratio	1	-0.0992719	0.0718865	0.167294	-0.24017	0.0416257	0.905496	0.786495	1.0425	0.866307
finn-pQTL-s-R10-seq_15515_2	ukb-saige-153	Colorectal cancer || id:ukb-saige-153	SAA1	Wald ratio	1	-0.0644158	0.0492592	0.190978	-0.160964	0.0321321	0.937615	0.851323	1.03265	0.866307
finn-pQTL-s-R10-seq_15558_63	ukb-saige-153	Colorectal cancer || id:ukb-saige-153	ENPEP	Wald ratio	1	0.0518598	0.0397592	0.192115	-0.0260682	0.129788	1.05323	0.974269	1.13859	0.866307
finn-pQTL-s-R10-seq_15653_9	ukb-saige-153	Colorectal cancer || id:ukb-saige-153	COL10A1	Wald ratio	1	0.0683584	0.0512688	0.182422	-0.0321284	0.168845	1.07075	0.968382	1.18394	0.866307
finn-pQTL-s-R10-seq_16300_4	ukb-saige-153	Colorectal cancer || id:ukb-saige-153	TREM2	Wald ratio	1	-0.0934432	0.0700824	0.182422	-0.230805	0.0439183	0.91079	0.793894	1.0449	0.866307
finn-pQTL-s-R10-seq_17164_15	ukb-saige-153	Colorectal cancer || id:ukb-saige-153	ANXA4	Wald ratio	1	0.0945102	0.0689669	0.170571	-0.0406649	0.229685	1.09912	0.960151	1.2582	0.866307
finn-pQTL-s-R10-seq_17341_89	ukb-saige-153	Colorectal cancer || id:ukb-saige-153	ACAT2	Wald ratio	1	-0.0749809	0.0568821	0.187443	-0.18647	0.036508	0.927761	0.829884	1.03718	0.866307
finn-pQTL-s-R10-seq_17794_6	ukb-saige-153	Colorectal cancer || id:ukb-saige-153	PMM2	Wald ratio	1	0.123311	0.0901628	0.171423	-0.0534082	0.30003	1.13124	0.947993	1.3499	0.866307
finn-pQTL-s-R10-seq_18832_65	ukb-saige-153	Colorectal cancer || id:ukb-saige-153	SAA2	Wald ratio	1	-0.0722369	0.05524	0.190978	-0.180507	0.0360335	0.93031	0.834847	1.03669	0.866307
finn-pQTL-s-R10-seq_20921_1	ukb-saige-153	Colorectal cancer || id:ukb-saige-153	GIPC2	Wald ratio	1	-0.0713265	0.0529854	0.178253	-0.175178	0.0325249	0.931158	0.839308	1.03306	0.866307
finn-pQTL-s-R10-seq_20923_10	ukb-saige-153	Colorectal cancer || id:ukb-saige-153	MDP1	Wald ratio	1	0.056755	0.0416204	0.172682	-0.0248209	0.138331	1.0584	0.975485	1.14836	0.866307
finn-pQTL-s-R10-seq_25060_18	ukb-saige-153	Colorectal cancer || id:ukb-saige-153	ME1	Wald ratio	1	-0.0835303	0.0609771	0.17073	-0.203046	0.0359849	0.919863	0.816241	1.03664	0.866307
finn-pQTL-s-R10-seq_2631_50	ukb-saige-153	Colorectal cancer || id:ukb-saige-153	IL10RB	Wald ratio	1	0.108818	0.0816133	0.182422	-0.0511443	0.26878	1.11496	0.950142	1.30837	0.866307
finn-pQTL-s-R10-seq_2855_49	ukb-saige-153	Colorectal cancer || id:ukb-saige-153	MAPK3	Wald ratio	1	-0.102308	0.0767311	0.182422	-0.252701	0.0480848	0.902751	0.7767	1.04926	0.866307
finn-pQTL-s-R10-seq_4407_10	ukb-saige-153	Colorectal cancer || id:ukb-saige-153	MST1	Wald ratio	1	0.0289664	0.0217248	0.182422	-0.0136142	0.0715469	1.02939	0.986478	1.07417	0.866307
finn-pQTL-s-R10-seq_4549_78	ukb-saige-153	Colorectal cancer || id:ukb-saige-153	FUT5	Wald ratio	1	-0.0565546	0.0433585	0.192115	-0.141537	0.0284281	0.945015	0.868023	1.02884	0.866307
finn-pQTL-s-R10-seq_5202_4	ukb-saige-153	Colorectal cancer || id:ukb-saige-153	PPID	Wald ratio	1	0.0843168	0.0642915	0.189697	-0.0416946	0.210328	1.08797	0.959163	1.23408	0.866307
finn-pQTL-s-R10-seq_5392_73	ukb-saige-153	Colorectal cancer || id:ukb-saige-153	FAS	Wald ratio	1	0.0837399	0.0621296	0.177714	-0.0380341	0.205514	1.08735	0.96268	1.22816	0.866307
finn-pQTL-s-R10-seq_5400_52	ukb-saige-153	Colorectal cancer || id:ukb-saige-153	LEPR	Wald ratio	1	-0.0265585	0.0200983	0.186359	-0.0659513	0.0128342	0.973791	0.936176	1.01292	0.866307
finn-pQTL-s-R10-seq_6248_68	ukb-saige-153	Colorectal cancer || id:ukb-saige-153	FAS	Wald ratio	1	0.102536	0.0760751	0.177714	-0.0465712	0.251643	1.10798	0.954497	1.28614	0.866307
finn-pQTL-s-R10-seq_9459_7	ukb-saige-153	Colorectal cancer || id:ukb-saige-153	FAS	Wald ratio	1	0.0693809	0.0514761	0.177714	-0.0315123	0.170274	1.07184	0.968979	1.18563	0.866307
finn-pQTL-s-R10-seq_15483_377	ukb-saige-153	Colorectal cancer || id:ukb-saige-153	AGRN	Wald ratio	1	0.095683	0.0751795	0.203115	-0.0516688	0.243035	1.10041	0.949643	1.27511	0.872552
finn-pQTL-s-R10-seq_24685_12	ukb-saige-153	Colorectal cancer || id:ukb-saige-153	SNX11	Wald ratio	1	0.0791366	0.0618255	0.200545	-0.0420413	0.200315	1.08235	0.95883	1.22179	0.872552
finn-pQTL-s-R10-seq_2741_22	ukb-saige-153	Colorectal cancer || id:ukb-saige-153	SIGLEC6	Wald ratio	1	0.0463426	0.036412	0.203115	-0.025025	0.11771	1.04743	0.975286	1.12492	0.872552
finn-pQTL-s-R10-seq_4151_6	ukb-saige-153	Colorectal cancer || id:ukb-saige-153	PLG	Wald ratio	1	-0.0659535	0.0512972	0.198543	-0.166496	0.0345889	0.936174	0.846626	1.03519	0.872552
finn-pQTL-s-R10-seq_5593_11	ukb-saige-153	Colorectal cancer || id:ukb-saige-153	PDIA5	Wald ratio	1	-0.0482104	0.0378796	0.203115	-0.122454	0.0260336	0.952933	0.884746	1.02638	0.872552
finn-pQTL-s-R10-seq_5687_5	ukb-saige-153	Colorectal cancer || id:ukb-saige-153	PRKCSH	Wald ratio	1	-0.10663	0.083305	0.200545	-0.269908	0.0566474	0.898858	0.76345	1.05828	0.872552
finn-pQTL-s-R10-seq_6359_50	ukb-saige-153	Colorectal cancer || id:ukb-saige-153	POMGNT2	Wald ratio	1	0.0858915	0.0668045	0.198543	-0.0450453	0.216828	1.08969	0.955954	1.24213	0.872552
finn-pQTL-s-R10-seq_7083_74	ukb-saige-153	Colorectal cancer || id:ukb-saige-153	MATN4	Wald ratio	1	0.0939257	0.0733794	0.200545	-0.049898	0.237749	1.09848	0.951326	1.26839	0.872552
finn-pQTL-s-R10-seq_10439_57	ukb-saige-153	Colorectal cancer || id:ukb-saige-153	AMY2B	Wald ratio	1	0.0795348	0.0681727	0.243345	-0.0540837	0.213153	1.08278	0.947353	1.23757	0.873463
finn-pQTL-s-R10-seq_10670_26	ukb-saige-153	Colorectal cancer || id:ukb-saige-153	SEMA3E	Wald ratio	1	-0.0772339	0.0621639	0.21408	-0.199075	0.0446073	0.925673	0.819488	1.04562	0.873463
finn-pQTL-s-R10-seq_10851_77	ukb-saige-153	Colorectal cancer || id:ukb-saige-153	EBI3	Wald ratio	1	-0.0276238	0.0228611	0.226919	-0.0724315	0.0171839	0.972754	0.930129	1.01733	0.873463
finn-pQTL-s-R10-seq_11232_46	ukb-saige-153	Colorectal cancer || id:ukb-saige-153	TCN1	Wald ratio	1	0.0858562	0.0710534	0.226919	-0.0534085	0.225121	1.08965	0.947993	1.25247	0.873463
finn-pQTL-s-R10-seq_11278_4	ukb-saige-153	Colorectal cancer || id:ukb-saige-153	COL11A2	Wald ratio	1	-0.128971	0.102828	0.209756	-0.330513	0.0725721	0.879	0.718555	1.07527	0.873463
finn-pQTL-s-R10-seq_12560_9	ukb-saige-153	Colorectal cancer || id:ukb-saige-153	NT5C	Wald ratio	1	0.0540335	0.0471842	0.252142	-0.0384475	0.146514	1.05552	0.962282	1.15779	0.873463
finn-pQTL-s-R10-seq_13676_46	ukb-saige-153	Colorectal cancer || id:ukb-saige-153	INHBB	Wald ratio	1	-0.0632551	0.0556645	0.255804	-0.172358	0.0458473	0.938704	0.841678	1.04691	0.873463
finn-pQTL-s-R10-seq_14041_13	ukb-saige-153	Colorectal cancer || id:ukb-saige-153	GZMB	Wald ratio	1	0.0392814	0.0352178	0.264686	-0.0297455	0.108308	1.04006	0.970693	1.11439	0.873463
finn-pQTL-s-R10-seq_14156_33	ukb-saige-153	Colorectal cancer || id:ukb-saige-153	YWHAB	Wald ratio	1	0.542011	0.439029	0.216991	-0.318486	1.40251	1.71946	0.727249	4.06538	0.873463
finn-pQTL-s-R10-seq_14747_9	ukb-saige-153	Colorectal cancer || id:ukb-saige-153	CRLF1	Wald ratio	1	-0.0867881	0.0748174	0.246049	-0.23343	0.0598539	0.916871	0.791813	1.06168	0.873463
finn-pQTL-s-R10-seq_15472_16	ukb-saige-153	Colorectal cancer || id:ukb-saige-153	LRP11	Wald ratio	1	-0.0303903	0.0267434	0.255804	-0.0828074	0.0220269	0.970067	0.920528	1.02227	0.873463
finn-pQTL-s-R10-seq_17170_15	ukb-saige-153	Colorectal cancer || id:ukb-saige-153	CALCB	Wald ratio	1	-0.0548476	0.0487534	0.260589	-0.150404	0.0407091	0.946629	0.86036	1.04155	0.873463
finn-pQTL-s-R10-seq_18235_16	ukb-saige-153	Colorectal cancer || id:ukb-saige-153	PGP	Wald ratio	1	-0.10442	0.0854349	0.221624	-0.271873	0.063032	0.900846	0.761951	1.06506	0.873463
finn-pQTL-s-R10-seq_18819_21	ukb-saige-153	Colorectal cancer || id:ukb-saige-153	PPIC	Wald ratio	1	0.0376519	0.0331337	0.255804	-0.0272901	0.102594	1.03837	0.973079	1.10804	0.873463
finn-pQTL-s-R10-seq_18917_53	ukb-saige-153	Colorectal cancer || id:ukb-saige-153	AMY2A	Wald ratio	1	0.0628881	0.0539041	0.243345	-0.0427639	0.16854	1.06491	0.958138	1.18358	0.873463
finn-pQTL-s-R10-seq_19130_81	ukb-saige-153	Colorectal cancer || id:ukb-saige-153	SERPINB8	Wald ratio	1	0.0605614	0.0532941	0.255804	-0.0438949	0.165018	1.06243	0.957055	1.17941	0.873463
finn-pQTL-s-R10-seq_20106_80	ukb-saige-153	Colorectal cancer || id:ukb-saige-153	DCPS	Wald ratio	1	0.0884833	0.0758428	0.243345	-0.0601686	0.237135	1.09252	0.941606	1.26761	0.873463
finn-pQTL-s-R10-seq_20378_110	ukb-saige-153	Colorectal cancer || id:ukb-saige-153	LZTFL1	Wald ratio	1	0.102649	0.0892598	0.250144	-0.0723004	0.277598	1.1081	0.930251	1.31996	0.873463
finn-pQTL-s-R10-seq_20457_13	ukb-saige-153	Colorectal cancer || id:ukb-saige-153	COA4	Wald ratio	1	-0.0611939	0.0545784	0.262198	-0.168168	0.0457797	0.940641	0.845212	1.04684	0.873463
finn-pQTL-s-R10-seq_21384_2	ukb-saige-153	Colorectal cancer || id:ukb-saige-153	FUCA1	Wald ratio	1	0.0834936	0.071566	0.243345	-0.0567757	0.223763	1.08708	0.944806	1.25077	0.873463
finn-pQTL-s-R10-seq_21491_7	ukb-saige-153	Colorectal cancer || id:ukb-saige-153	AOC3	Wald ratio	1	0.0456306	0.03784	0.227863	-0.0285358	0.119797	1.04669	0.971867	1.12727	0.873463
finn-pQTL-s-R10-seq_24931_9	ukb-saige-153	Colorectal cancer || id:ukb-saige-153	EPS8L3	Wald ratio	1	0.0830965	0.0727094	0.253098	-0.059414	0.225607	1.08665	0.942317	1.25308	0.873463
finn-pQTL-s-R10-seq_2590_69	ukb-saige-153	Colorectal cancer || id:ukb-saige-153	ROR1	Wald ratio	1	-0.0899724	0.0745486	0.227472	-0.236088	0.0561428	0.913956	0.789711	1.05775	0.873463
finn-pQTL-s-R10-seq_2843_13	ukb-saige-153	Colorectal cancer || id:ukb-saige-153	SPINT2	Wald ratio	1	0.0366043	0.0305036	0.230139	-0.0231827	0.0963914	1.03728	0.977084	1.10119	0.873463
finn-pQTL-s-R10-seq_2900_53	ukb-saige-153	Colorectal cancer || id:ukb-saige-153	CCL14	Wald ratio	1	0.0358477	0.0304162	0.238569	-0.0237681	0.0954635	1.0365	0.976512	1.10017	0.873463
finn-pQTL-s-R10-seq_2966_65	ukb-saige-153	Colorectal cancer || id:ukb-saige-153	CLEC11A	Wald ratio	1	-0.0763666	0.0681425	0.26242	-0.209926	0.0571927	0.926476	0.810644	1.05886	0.873463
finn-pQTL-s-R10-seq_3194_36	ukb-saige-153	Colorectal cancer || id:ukb-saige-153	GP6	Wald ratio	1	-0.0406955	0.0347109	0.241031	-0.108729	0.0273378	0.960121	0.896974	1.02771	0.873463
finn-pQTL-s-R10-seq_3758_63	ukb-saige-153	Colorectal cancer || id:ukb-saige-153	PROC	Wald ratio	1	0.090966	0.0769713	0.237278	-0.0598976	0.24183	1.09523	0.941861	1.27358	0.873463
finn-pQTL-s-R10-seq_4133_54	ukb-saige-153	Colorectal cancer || id:ukb-saige-153	GZMB	Wald ratio	1	-0.0448502	0.0388702	0.248563	-0.121036	0.0313354	0.956141	0.886002	1.03183	0.873463
finn-pQTL-s-R10-seq_4500_50	ukb-saige-153	Colorectal cancer || id:ukb-saige-153	CLEC11A	Wald ratio	1	-0.0752173	0.067117	0.26242	-0.206767	0.056332	0.927542	0.813209	1.05795	0.873463
finn-pQTL-s-R10-seq_4559_64	ukb-saige-153	Colorectal cancer || id:ukb-saige-153	KYNU	Wald ratio	1	0.0602708	0.0493125	0.221624	-0.0363816	0.156923	1.06212	0.964272	1.16991	0.873463
finn-pQTL-s-R10-seq_4990_87	ukb-saige-153	Colorectal cancer || id:ukb-saige-153	GP1BA	Wald ratio	1	-0.104383	0.0910577	0.251654	-0.282856	0.0740899	0.90088	0.753628	1.0769	0.873463
finn-pQTL-s-R10-seq_5069_9	ukb-saige-153	Colorectal cancer || id:ukb-saige-153	CD55	Wald ratio	1	-0.0632645	0.0564862	0.262714	-0.173977	0.0474484	0.938695	0.840316	1.04859	0.873463
finn-pQTL-s-R10-seq_5483_1	ukb-saige-153	Colorectal cancer || id:ukb-saige-153	RGMA	Wald ratio	1	0.157251	0.137369	0.252318	-0.111992	0.426495	1.17029	0.894051	1.53188	0.873463
finn-pQTL-s-R10-seq_5900_11	ukb-saige-153	Colorectal cancer || id:ukb-saige-153	HINT1	Wald ratio	1	0.0829849	0.0744003	0.264686	-0.0628396	0.22881	1.08653	0.939094	1.2571	0.873463
finn-pQTL-s-R10-seq_6039_24	ukb-saige-153	Colorectal cancer || id:ukb-saige-153	CRHBP	Wald ratio	1	-0.0375072	0.0317368	0.237278	-0.0997113	0.024697	0.963188	0.905099	1.025	0.873463
finn-pQTL-s-R10-seq_6217_23	ukb-saige-153	Colorectal cancer || id:ukb-saige-153	QSOX1	Wald ratio	1	-0.0560509	0.0484076	0.246907	-0.15093	0.038828	0.945491	0.859908	1.03959	0.873463
finn-pQTL-s-R10-seq_6366_38	ukb-saige-153	Colorectal cancer || id:ukb-saige-153	TXNDC15	Wald ratio	1	0.058836	0.049295	0.232655	-0.0377822	0.155454	1.0606	0.962923	1.16819	0.873463
finn-pQTL-s-R10-seq_6546_41	ukb-saige-153	Colorectal cancer || id:ukb-saige-153	DKK2	Wald ratio	1	0.057511	0.0506877	0.256537	-0.0418368	0.156859	1.0592	0.959026	1.16983	0.873463
finn-pQTL-s-R10-seq_6551_94	ukb-saige-153	Colorectal cancer || id:ukb-saige-153	SERPINA12	Wald ratio	1	0.0503914	0.040943	0.218409	-0.0298569	0.13064	1.05168	0.970584	1.13956	0.873463
finn-pQTL-s-R10-seq_6713_4	ukb-saige-153	Colorectal cancer || id:ukb-saige-153	LRP11	Wald ratio	1	-0.028175	0.024794	0.255804	-0.0767712	0.0204212	0.972218	0.926102	1.02063	0.873463
finn-pQTL-s-R10-seq_7049_2	ukb-saige-153	Colorectal cancer || id:ukb-saige-153	ADAM23	Wald ratio	1	-0.0719097	0.0632806	0.255804	-0.19594	0.0521202	0.930615	0.822062	1.0535	0.873463
finn-pQTL-s-R10-seq_8299_66	ukb-saige-153	Colorectal cancer || id:ukb-saige-153	LILRA4	Wald ratio	1	-0.0624852	0.0549869	0.255804	-0.17026	0.0452892	0.939427	0.843446	1.04633	0.873463
finn-pQTL-s-R10-seq_8330_1	ukb-saige-153	Colorectal cancer || id:ukb-saige-153	LRP11	Wald ratio	1	-0.0305504	0.0268844	0.255804	-0.0832438	0.022143	0.969912	0.920127	1.02239	0.873463
finn-pQTL-s-R10-seq_8474_6	ukb-saige-153	Colorectal cancer || id:ukb-saige-153	ROR1	Wald ratio	1	-0.0890617	0.073794	0.227472	-0.233698	0.0555745	0.914789	0.791601	1.05715	0.873463
finn-pQTL-s-R10-seq_8842_16	ukb-saige-153	Colorectal cancer || id:ukb-saige-153	GRAMD1C	Wald ratio	1	-0.0529277	0.0434763	0.223455	-0.138141	0.0322859	0.948449	0.870976	1.03281	0.873463
finn-pQTL-s-R10-seq_9013_60	ukb-saige-153	Colorectal cancer || id:ukb-saige-153	NTN1	Wald ratio	1	0.0784993	0.0644096	0.222939	-0.0477436	0.204742	1.08166	0.953378	1.22721	0.873463
finn-pQTL-s-R10-seq_9017_58	ukb-saige-153	Colorectal cancer || id:ukb-saige-153	LCT	Wald ratio	1	-0.0307434	0.0265029	0.246049	-0.082689	0.0212023	0.969724	0.920637	1.02143	0.873463
finn-pQTL-s-R10-seq_9241_40	ukb-saige-153	Colorectal cancer || id:ukb-saige-153	SIRPG	Wald ratio	1	-0.0808797	0.0715474	0.258293	-0.221113	0.0593533	0.922305	0.801626	1.06115	0.873463
finn-pQTL-s-R10-seq_9314_9	ukb-saige-153	Colorectal cancer || id:ukb-saige-153	PSG5	Wald ratio	1	0.083721	0.0660955	0.205275	-0.0458262	0.213268	1.08733	0.955208	1.23772	0.873463
finn-pQTL-s-R10-seq_9854_36	ukb-saige-153	Colorectal cancer || id:ukb-saige-153	AKR1B1	Wald ratio	1	-0.0881742	0.0729441	0.226743	-0.231145	0.0547963	0.915601	0.793625	1.05633	0.873463
finn-pQTL-s-R10-seq_15499_11	ukb-saige-153	Colorectal cancer || id:ukb-saige-153	ATRN	Wald ratio	1	-0.0594517	0.0535799	0.267176	-0.164468	0.045565	0.942281	0.848345	1.04662	0.875828
finn-pQTL-s-R10-seq_3378_49	ukb-saige-153	Colorectal cancer || id:ukb-saige-153	KLK7	Wald ratio	1	0.0781894	0.0705611	0.267815	-0.0601105	0.216489	1.08133	0.941661	1.24171	0.875828
finn-pQTL-s-R10-seq_13095_51	ukb-saige-153	Colorectal cancer || id:ukb-saige-153	REG1A	Wald ratio	1	-0.0831936	0.0756305	0.271332	-0.231429	0.0650422	0.920173	0.793399	1.0672	0.876654
finn-pQTL-s-R10-seq_14032_2	ukb-saige-153	Colorectal cancer || id:ukb-saige-153	VEGFA	Wald ratio	1	-0.0558129	0.0509596	0.273412	-0.155694	0.0440679	0.945716	0.855821	1.04505	0.876654
finn-pQTL-s-R10-seq_14273_19	ukb-saige-153	Colorectal cancer || id:ukb-saige-153	PREP	Wald ratio	1	0.055517	0.05047	0.271332	-0.0434042	0.154438	1.05709	0.957524	1.167	0.876654
finn-pQTL-s-R10-seq_17460_51	ukb-saige-153	Colorectal cancer || id:ukb-saige-153	MX1	Wald ratio	1	-0.0743939	0.0681944	0.275313	-0.208055	0.0592672	0.928306	0.812162	1.06106	0.876654
finn-pQTL-s-R10-seq_3132_1	ukb-saige-153	Colorectal cancer || id:ukb-saige-153	VEGFC	Wald ratio	1	-0.0990099	0.0907591	0.275313	-0.276898	0.0788779	0.905734	0.758132	1.08207	0.876654
finn-pQTL-s-R10-seq_6649_51	ukb-saige-153	Colorectal cancer || id:ukb-saige-153	NTN1	Wald ratio	1	0.0727472	0.0665117	0.274065	-0.0576158	0.20311	1.07546	0.944013	1.22521	0.876654
finn-pQTL-s-R10-seq_8288_27	ukb-saige-153	Colorectal cancer || id:ukb-saige-153	APOH	Wald ratio	1	0.0315	0.0291838	0.280425	-0.0257003	0.0887003	1.032	0.974627	1.09275	0.889033
finn-pQTL-s-R10-seq_20067_26	ukb-saige-153	Colorectal cancer || id:ukb-saige-153	HABP2	Wald ratio	1	0.0526812	0.0489843	0.282164	-0.043328	0.14869	1.05409	0.957597	1.16031	0.890656
finn-pQTL-s-R10-seq_2571_12	ukb-saige-153	Colorectal cancer || id:ukb-saige-153	IGFBP3	Wald ratio	1	-0.0761928	0.0716212	0.287406	-0.21657	0.0641848	0.926638	0.805276	1.06629	0.903275
finn-pQTL-s-R10-seq_12008_3	ukb-saige-153	Colorectal cancer || id:ukb-saige-153	CD7	Wald ratio	1	-0.0456513	0.0438955	0.29834	-0.131686	0.0403838	0.955375	0.876616	1.04121	0.908603
finn-pQTL-s-R10-seq_16781_2	ukb-saige-153	Colorectal cancer || id:ukb-saige-153	ENGASE	Wald ratio	1	-0.0512848	0.0496821	0.301951	-0.148662	0.0460922	0.950008	0.861861	1.04717	0.908603
finn-pQTL-s-R10-seq_17748_21	ukb-saige-153	Colorectal cancer || id:ukb-saige-153	TP53I3	Wald ratio	1	0.0386204	0.037333	0.300911	-0.0345524	0.111793	1.03938	0.966038	1.11828	0.908603
finn-pQTL-s-R10-seq_3461_58	ukb-saige-153	Colorectal cancer || id:ukb-saige-153	BCAN	Wald ratio	1	-0.0732739	0.0702209	0.296727	-0.210907	0.0643589	0.929346	0.80985	1.06648	0.908603
finn-pQTL-s-R10-seq_4126_22	ukb-saige-153	Colorectal cancer || id:ukb-saige-153	BPI	Wald ratio	1	-0.0551615	0.0535391	0.302868	-0.160098	0.0497751	0.946332	0.85206	1.05103	0.908603
finn-pQTL-s-R10-seq_5078_82	ukb-saige-153	Colorectal cancer || id:ukb-saige-153	EPHB6	Wald ratio	1	0.0701099	0.0673055	0.297566	-0.0618089	0.202029	1.07263	0.940063	1.22388	0.908603
finn-pQTL-s-R10-seq_5091_28	ukb-saige-153	Colorectal cancer || id:ukb-saige-153	LILRB2	Wald ratio	1	0.0268503	0.0258913	0.299719	-0.0238967	0.0775973	1.02721	0.976387	1.08069	0.908603
finn-pQTL-s-R10-seq_5631_83	ukb-saige-153	Colorectal cancer || id:ukb-saige-153	MLN	Wald ratio	1	0.0619715	0.0595879	0.29834	-0.0548209	0.178764	1.06393	0.946655	1.19574	0.908603
finn-pQTL-s-R10-seq_5633_65	ukb-saige-153	Colorectal cancer || id:ukb-saige-153	LILRB2	Wald ratio	1	0.0432073	0.0416642	0.299719	-0.0384545	0.124869	1.04415	0.962276	1.133	0.908603
finn-pQTL-s-R10-seq_7870_8	ukb-saige-153	Colorectal cancer || id:ukb-saige-153	CNDP1	Wald ratio	1	-0.0906409	0.0858703	0.291171	-0.258947	0.0776649	0.913346	0.771864	1.08076	0.908603
finn-pQTL-s-R10-seq_9261_14	ukb-saige-153	Colorectal cancer || id:ukb-saige-153	EPHB6	Wald ratio	1	0.0804925	0.0772728	0.297566	-0.0709622	0.231947	1.08382	0.931497	1.26105	0.908603
finn-pQTL-s-R10-seq_10816_150	ukb-saige-153	Colorectal cancer || id:ukb-saige-153	PILRA	Inverse variance weighted	2	-0.0119347	0.0198941	0.548566	-0.050927	0.0270577	0.988136	0.950348	1.02743	0.908649
finn-pQTL-s-R10-seq_10855_55	ukb-saige-153	Colorectal cancer || id:ukb-saige-153	PLXNB2	Inverse variance weighted	2	-0.0325834	0.0194968	0.0946779	-0.0707972	0.00563025	0.967942	0.931651	1.00565	0.908649
finn-pQTL-s-R10-seq_10924_258	ukb-saige-153	Colorectal cancer || id:ukb-saige-153	CYB5D2	Inverse variance weighted	2	0.0327949	0.0388326	0.398379	-0.0433169	0.108907	1.03334	0.957608	1.11506	0.908649
finn-pQTL-s-R10-seq_11187_11	ukb-saige-153	Colorectal cancer || id:ukb-saige-153	CLEC12A	Inverse variance weighted	2	0.0250777	0.019305	0.193935	-0.0127601	0.0629155	1.02539	0.987321	1.06494	0.908649
finn-pQTL-s-R10-seq_13090_17	ukb-saige-153	Colorectal cancer || id:ukb-saige-153	S100A6	Inverse variance weighted	2	0.0529734	0.0510978	0.299873	-0.0471784	0.153125	1.0544	0.953917	1.16547	0.908649
finn-pQTL-s-R10-seq_13116_25	ukb-saige-153	Colorectal cancer || id:ukb-saige-153	CD177	Inverse variance weighted	2	-0.0431695	0.0469676	0.358026	-0.135226	0.048887	0.957749	0.873519	1.0501	0.908649
finn-pQTL-s-R10-seq_13740_51	ukb-saige-153	Colorectal cancer || id:ukb-saige-153	FRZB	Inverse variance weighted	2	-0.0265656	0.0529903	0.616138	-0.130427	0.0772953	0.973784	0.877721	1.08036	0.908649
finn-pQTL-s-R10-seq_13983_27	ukb-saige-153	Colorectal cancer || id:ukb-saige-153	CRYZ	Inverse variance weighted	2	-0.018909	0.0295093	0.521666	-0.0767472	0.0389292	0.981269	0.926124	1.0397	0.908649
finn-pQTL-s-R10-seq_14108_15	ukb-saige-153	Colorectal cancer || id:ukb-saige-153	TGFB1	Inverse variance weighted	2	0.0537536	0.0466686	0.249397	-0.0377169	0.145224	1.05522	0.962986	1.1563	0.908649
finn-pQTL-s-R10-seq_15516_12	ukb-saige-153	Colorectal cancer || id:ukb-saige-153	SAA4	Inverse variance weighted	2	-0.0173558	0.0331538	0.60063	-0.0823372	0.0476255	0.982794	0.920961	1.04878	0.908649
finn-pQTL-s-R10-seq_15576_158	ukb-saige-153	Colorectal cancer || id:ukb-saige-153	RNASE3	Inverse variance weighted	2	-0.0211183	0.0419686	0.614829	-0.103377	0.0611402	0.979103	0.901787	1.06305	0.908649
finn-pQTL-s-R10-seq_15614_168	ukb-saige-153	Colorectal cancer || id:ukb-saige-153	LILRA2	Inverse variance weighted	2	0.0260486	0.0476715	0.584778	-0.0673875	0.119485	1.02639	0.934833	1.12692	0.908649
finn-pQTL-s-R10-seq_16558_2	ukb-saige-153	Colorectal cancer || id:ukb-saige-153	MYOC	Inverse variance weighted	2	-0.0369401	0.0542661	0.496048	-0.143302	0.0694215	0.963734	0.866493	1.07189	0.908649
finn-pQTL-s-R10-seq_16583_8	ukb-saige-153	Colorectal cancer || id:ukb-saige-153	NUDT2	Inverse variance weighted	2	0.0583995	0.0379838	0.124175	-0.0160489	0.132848	1.06014	0.984079	1.14208	0.908649
finn-pQTL-s-R10-seq_16753_46	ukb-saige-153	Colorectal cancer || id:ukb-saige-153	COL6A2	Inverse variance weighted	2	0.0335017	0.0498648	0.501679	-0.0642334	0.131237	1.03407	0.937786	1.14024	0.908649
finn-pQTL-s-R10-seq_16872_248	ukb-saige-153	Colorectal cancer || id:ukb-saige-153	GSTZ1	Inverse variance weighted	2	-0.0281152	0.0257838	0.275527	-0.0786515	0.022421	0.972276	0.924362	1.02267	0.908649
finn-pQTL-s-R10-seq_17680_12	ukb-saige-153	Colorectal cancer || id:ukb-saige-153	EPHB1	Inverse variance weighted	2	-0.0578485	0.0690848	0.402393	-0.193255	0.0775577	0.943793	0.824272	1.08064	0.908649
finn-pQTL-s-R10-seq_18225_13	ukb-saige-153	Colorectal cancer || id:ukb-saige-153	HEBP1	Inverse variance weighted	2	-0.0441152	0.0376206	0.240942	-0.117851	0.0296211	0.956844	0.888828	1.03006	0.908649
finn-pQTL-s-R10-seq_18289_16	ukb-saige-153	Colorectal cancer || id:ukb-saige-153	CCL15	Inverse variance weighted	2	-0.0207296	0.0273575	0.448614	-0.0743503	0.0328912	0.979484	0.928346	1.03344	0.908649
finn-pQTL-s-R10-seq_19361_78	ukb-saige-153	Colorectal cancer || id:ukb-saige-153	MATN3	Inverse variance weighted	2	0.0826423	0.0631336	0.190532	-0.0410994	0.206384	1.08615	0.959734	1.22923	0.908649
finn-pQTL-s-R10-seq_19372_7	ukb-saige-153	Colorectal cancer || id:ukb-saige-153	MDGA2	Inverse variance weighted	2	0.0307356	0.0473131	0.515937	-0.0619981	0.123469	1.03121	0.939885	1.13142	0.908649
finn-pQTL-s-R10-seq_19377_14	ukb-saige-153	Colorectal cancer || id:ukb-saige-153	OLFM2	Inverse variance weighted	2	0.0369531	0.0275801	0.180296	-0.017104	0.0910101	1.03764	0.983041	1.09528	0.908649
finn-pQTL-s-R10-seq_19557_3	ukb-saige-153	Colorectal cancer || id:ukb-saige-153	KLB	Inverse variance weighted	2	-0.0397697	0.0367982	0.279809	-0.111894	0.0323549	0.961011	0.894139	1.03288	0.908649
finn-pQTL-s-R10-seq_19614_8	ukb-saige-153	Colorectal cancer || id:ukb-saige-153	TCN1	Inverse variance weighted	2	0.0252235	0.039043	0.518251	-0.0513008	0.101748	1.02554	0.949993	1.1071	0.908649
finn-pQTL-s-R10-seq_20203_45	ukb-saige-153	Colorectal cancer || id:ukb-saige-153	C1S	Inverse variance weighted	2	0.0824696	0.114775	0.472428	-0.142489	0.307428	1.08597	0.867197	1.35992	0.908649
finn-pQTL-s-R10-seq_20530_2	ukb-saige-153	Colorectal cancer || id:ukb-saige-153	SEMA6D	Inverse variance weighted	2	-0.0636404	0.0374585	0.0893272	-0.137059	0.00977826	0.938342	0.871919	1.00983	0.908649
finn-pQTL-s-R10-seq_20538_71	ukb-saige-153	Colorectal cancer || id:ukb-saige-153	SIGLEC11	Inverse variance weighted	2	-0.0768264	0.0440652	0.0812512	-0.163194	0.00954134	0.926051	0.849426	1.00959	0.908649
finn-pQTL-s-R10-seq_20539_4	ukb-saige-153	Colorectal cancer || id:ukb-saige-153	DEFA3	Inverse variance weighted	2	-0.0405908	0.0386152	0.293186	-0.116277	0.0350951	0.960222	0.890229	1.03572	0.908649
finn-pQTL-s-R10-seq_20568_3	ukb-saige-153	Colorectal cancer || id:ukb-saige-153	FREM1	Inverse variance weighted	2	-0.0556596	0.0359014	0.121058	-0.126026	0.014707	0.945861	0.881592	1.01482	0.908649
finn-pQTL-s-R10-seq_20591_48	ukb-saige-153	Colorectal cancer || id:ukb-saige-153	GLDN	Inverse variance weighted	2	0.0162082	0.0287863	0.573399	-0.0402129	0.0726294	1.01634	0.960585	1.07533	0.908649
finn-pQTL-s-R10-seq_21437_77	ukb-saige-153	Colorectal cancer || id:ukb-saige-153	MGMT	Inverse variance weighted	2	0.0313131	0.0404666	0.439048	-0.0480013	0.110628	1.03181	0.953133	1.11698	0.908649
finn-pQTL-s-R10-seq_21546_20	ukb-saige-153	Colorectal cancer || id:ukb-saige-153	ADGRD1	Inverse variance weighted	2	0.0388968	0.0493375	0.430473	-0.0578046	0.135598	1.03966	0.943834	1.14522	0.908649
finn-pQTL-s-R10-seq_21706_29	ukb-saige-153	Colorectal cancer || id:ukb-saige-153	LILRA1	Inverse variance weighted	2	0.0369008	0.0504288	0.464327	-0.0619397	0.135741	1.03759	0.93994	1.14539	0.908649
finn-pQTL-s-R10-seq_21737_20	ukb-saige-153	Colorectal cancer || id:ukb-saige-153	ST6GAL2	Inverse variance weighted	2	0.028603	0.0296794	0.335179	-0.0295685	0.0867746	1.02902	0.970864	1.09065	0.908649
finn-pQTL-s-R10-seq_21797_4	ukb-saige-153	Colorectal cancer || id:ukb-saige-153	HLA-C	Inverse variance weighted (multiplicative random effects)	3	0.0226651	0.0326329	0.48734	-0.0412955	0.0866256	1.02292	0.959546	1.09049	0.908649
finn-pQTL-s-R10-seq_21891_31	ukb-saige-153	Colorectal cancer || id:ukb-saige-153	FBLN7	Inverse variance weighted	2	-0.0393767	0.0717733	0.583262	-0.180052	0.101299	0.961389	0.835227	1.10661	0.908649
finn-pQTL-s-R10-seq_24215_8	ukb-saige-153	Colorectal cancer || id:ukb-saige-153	PRRX1	Inverse variance weighted	3	-0.0131557	0.021548	0.541509	-0.0553897	0.0290783	0.98693	0.946116	1.02951	0.908649
finn-pQTL-s-R10-seq_2515_14	ukb-saige-153	Colorectal cancer || id:ukb-saige-153	GFRA2	Inverse variance weighted	2	-0.0920391	0.0698763	0.187781	-0.228997	0.0449184	0.912069	0.795331	1.04594	0.908649
finn-pQTL-s-R10-seq_2687_2	ukb-saige-153	Colorectal cancer || id:ukb-saige-153	MIA	Inverse variance weighted	2	0.018663	0.0314468	0.552861	-0.0429727	0.0802986	1.01884	0.957938	1.08361	0.908649
finn-pQTL-s-R10-seq_2705_5	ukb-saige-153	Colorectal cancer || id:ukb-saige-153	CCL25	Inverse variance weighted	2	-0.0211546	0.0336803	0.529938	-0.0871681	0.0448588	0.979068	0.916523	1.04588	0.908649
finn-pQTL-s-R10-seq_2742_68	ukb-saige-153	Colorectal cancer || id:ukb-saige-153	SIGLEC7	Inverse variance weighted	2	-0.0446099	0.0454125	0.325939	-0.133618	0.0443986	0.95637	0.874924	1.0454	0.908649
finn-pQTL-s-R10-seq_3000_66	ukb-saige-153	Colorectal cancer || id:ukb-saige-153	MBL2	Inverse variance weighted	2	-0.0276452	0.0228143	0.225609	-0.0723613	0.0170709	0.972733	0.930195	1.01722	0.908649
finn-pQTL-s-R10-seq_3003_29	ukb-saige-153	Colorectal cancer || id:ukb-saige-153	NCR3	Inverse variance weighted	2	0.0737786	0.10034	0.462164	-0.122887	0.270444	1.07657	0.884363	1.31055	0.908649
finn-pQTL-s-R10-seq_3007_7	ukb-saige-153	Colorectal cancer || id:ukb-saige-153	SIGLEC9	Inverse variance weighted	2	-0.0181238	0.0189715	0.339418	-0.055308	0.0190604	0.982039	0.946194	1.01924	0.908649
finn-pQTL-s-R10-seq_3166_92	ukb-saige-153	Colorectal cancer || id:ukb-saige-153	CD33	Inverse variance weighted	2	0.0164979	0.022739	0.468124	-0.0280705	0.0610663	1.01663	0.97232	1.06297	0.908649
finn-pQTL-s-R10-seq_3296_92	ukb-saige-153	Colorectal cancer || id:ukb-saige-153	CNTN2	Inverse variance weighted	2	0.0480463	0.0342911	0.161175	-0.0191642	0.115257	1.04922	0.981018	1.12216	0.908649
finn-pQTL-s-R10-seq_3509_1	ukb-saige-153	Colorectal cancer || id:ukb-saige-153	CCL15	Inverse variance weighted	2	-0.0218824	0.0289018	0.448973	-0.07853	0.0347652	0.978355	0.924474	1.03538	0.908649
finn-pQTL-s-R10-seq_3600_2	ukb-saige-153	Colorectal cancer || id:ukb-saige-153	CHIT1	Inverse variance weighted	2	0.0293105	0.0277381	0.290654	-0.0250561	0.0836771	1.02974	0.975255	1.08728	0.908649
finn-pQTL-s-R10-seq_3617_80	ukb-saige-153	Colorectal cancer || id:ukb-saige-153	HGFAC	Inverse variance weighted	2	0.0283929	0.0220552	0.19797	-0.0148353	0.0716211	1.0288	0.985274	1.07425	0.908649
finn-pQTL-s-R10-seq_4342_10	ukb-saige-153	Colorectal cancer || id:ukb-saige-153	ICAM1	Inverse variance weighted	2	0.0242764	0.0198966	0.222418	-0.014721	0.0632737	1.02457	0.985387	1.06532	0.908649
finn-pQTL-s-R10-seq_4430_44	ukb-saige-153	Colorectal cancer || id:ukb-saige-153	COLEC11	Inverse variance weighted	2	-0.0552085	0.0463279	0.233383	-0.146011	0.0355942	0.946288	0.864148	1.03624	0.908649
finn-pQTL-s-R10-seq_4437_56	ukb-saige-153	Colorectal cancer || id:ukb-saige-153	ENTPD5	Inverse variance weighted	2	-0.0296083	0.0365647	0.418084	-0.101275	0.0420586	0.970826	0.903684	1.04296	0.908649
finn-pQTL-s-R10-seq_4459_68	ukb-saige-153	Colorectal cancer || id:ukb-saige-153	PCSK7	Inverse variance weighted	3	-0.0333857	0.0220067	0.129249	-0.0765188	0.00974745	0.967165	0.926335	1.0098	0.908649
finn-pQTL-s-R10-seq_4496_60	ukb-saige-153	Colorectal cancer || id:ukb-saige-153	MMP12	Inverse variance weighted	2	0.0601402	0.0379773	0.113288	-0.0142952	0.134576	1.06199	0.985806	1.14405	0.908649
finn-pQTL-s-R10-seq_4535_50	ukb-saige-153	Colorectal cancer || id:ukb-saige-153	BST1	Inverse variance weighted	2	0.0224417	0.0289898	0.438857	-0.0343783	0.0792617	1.0227	0.966206	1.08249	0.908649
finn-pQTL-s-R10-seq_4564_2	ukb-saige-153	Colorectal cancer || id:ukb-saige-153	PLXNC1	Inverse variance weighted	2	0.0235412	0.0457066	0.606518	-0.0660438	0.113126	1.02382	0.93609	1.11977	0.908649
finn-pQTL-s-R10-seq_4991_12	ukb-saige-153	Colorectal cancer || id:ukb-saige-153	GPC5	Inverse variance weighted	2	-0.0471915	0.0307737	0.125153	-0.107508	0.013125	0.953905	0.898069	1.01321	0.908649
finn-pQTL-s-R10-seq_4996_66	ukb-saige-153	Colorectal cancer || id:ukb-saige-153	HRG	Inverse variance weighted	2	-0.0229675	0.0215598	0.286744	-0.0652247	0.0192897	0.977294	0.936857	1.01948	0.908649
finn-pQTL-s-R10-seq_5102_55	ukb-saige-153	Colorectal cancer || id:ukb-saige-153	MICB	Inverse variance weighted	2	-0.0503987	0.0336187	0.133841	-0.116291	0.015494	0.95085	0.890216	1.01561	0.908649
finn-pQTL-s-R10-seq_5132_71	ukb-saige-153	Colorectal cancer || id:ukb-saige-153	IL27RA	Inverse variance weighted	2	-0.0155338	0.0279161	0.577905	-0.0702493	0.0391817	0.984586	0.932161	1.03996	0.908649
finn-pQTL-s-R10-seq_5134_52	ukb-saige-153	Colorectal cancer || id:ukb-saige-153	HAVCR2	Inverse variance weighted	2	0.0568595	0.0381917	0.136542	-0.0179962	0.131715	1.05851	0.982165	1.14078	0.908649
finn-pQTL-s-R10-seq_5231_79	ukb-saige-153	Colorectal cancer || id:ukb-saige-153	PCSK9	Inverse variance weighted	2	-0.0396613	0.0674466	0.556505	-0.171857	0.0925339	0.961115	0.8421	1.09695	0.908649
finn-pQTL-s-R10-seq_5363_51	ukb-saige-153	Colorectal cancer || id:ukb-saige-153	SEMA3E	Inverse variance weighted	2	0.0216554	0.0258252	0.401728	-0.028962	0.0722728	1.02189	0.971453	1.07495	0.908649
finn-pQTL-s-R10-seq_5487_7	ukb-saige-153	Colorectal cancer || id:ukb-saige-153	SLAMF7	Inverse variance weighted	2	-0.0253997	0.0379863	0.503715	-0.0998529	0.0490534	0.97492	0.904971	1.05028	0.908649
finn-pQTL-s-R10-seq_5584_21	ukb-saige-153	Colorectal cancer || id:ukb-saige-153	TCN2	Inverse variance weighted	3	0.0270712	0.0308309	0.379915	-0.0333574	0.0874998	1.02744	0.967193	1.09144	0.908649
finn-pQTL-s-R10-seq_5620_13	ukb-saige-153	Colorectal cancer || id:ukb-saige-153	PAM	Inverse variance weighted	2	-0.0162137	0.0296304	0.584244	-0.0742894	0.041862	0.983917	0.928403	1.04275	0.908649
finn-pQTL-s-R10-seq_5646_20	ukb-saige-153	Colorectal cancer || id:ukb-saige-153	RNASE6	Inverse variance weighted	2	-0.0590885	0.0721212	0.412619	-0.200446	0.0822692	0.942623	0.818366	1.08575	0.908649
finn-pQTL-s-R10-seq_5648_28	ukb-saige-153	Colorectal cancer || id:ukb-saige-153	CTRB2	Inverse variance weighted	3	-0.0390864	0.0296213	0.186989	-0.0971441	0.0189713	0.961668	0.907425	1.01915	0.908649
finn-pQTL-s-R10-seq_5698_60	ukb-saige-153	Colorectal cancer || id:ukb-saige-153	TNXB	Inverse variance weighted	3	0.0533209	0.0375746	0.15588	-0.0203254	0.126967	1.05477	0.97988	1.13538	0.908649
finn-pQTL-s-R10-seq_5741_55	ukb-saige-153	Colorectal cancer || id:ukb-saige-153	RNASE3	Inverse variance weighted	2	-0.0232372	0.0449811	0.605436	-0.1114	0.0649258	0.977031	0.894581	1.06708	0.908649
finn-pQTL-s-R10-seq_6364_7	ukb-saige-153	Colorectal cancer || id:ukb-saige-153	TAPBPL	Inverse variance weighted	2	0.0350108	0.0200522	0.0808136	-0.00429147	0.0743131	1.03563	0.995718	1.07714	0.908649
finn-pQTL-s-R10-seq_6393_63	ukb-saige-153	Colorectal cancer || id:ukb-saige-153	HSP90B1	Inverse variance weighted	2	-0.0295496	0.0199468	0.138495	-0.0686454	0.00954618	0.970883	0.933658	1.00959	0.908649
finn-pQTL-s-R10-seq_6402_8	ukb-saige-153	Colorectal cancer || id:ukb-saige-153	PILRA	Inverse variance weighted	2	-0.0129545	0.0187847	0.490428	-0.0497725	0.0238635	0.987129	0.951446	1.02415	0.908649
finn-pQTL-s-R10-seq_6414_8	ukb-saige-153	Colorectal cancer || id:ukb-saige-153	OAF	Inverse variance weighted	2	-0.0251592	0.029351	0.391342	-0.0826871	0.0323687	0.975155	0.920639	1.0329	0.908649
finn-pQTL-s-R10-seq_6544_33	ukb-saige-153	Colorectal cancer || id:ukb-saige-153	NELL1	Inverse variance weighted	2	-0.0569008	0.0639512	0.373598	-0.182245	0.0684435	0.944688	0.833397	1.07084	0.908649
finn-pQTL-s-R10-seq_7179_69	ukb-saige-153	Colorectal cancer || id:ukb-saige-153	NFASC	Inverse variance weighted	2	-0.019694	0.0388928	0.612599	-0.095924	0.0565359	0.980499	0.908533	1.05816	0.908649
finn-pQTL-s-R10-seq_7882_31	ukb-saige-153	Colorectal cancer || id:ukb-saige-153	SLAMF7	Inverse variance weighted	2	0.080019	0.0448951	0.0746914	-0.00797539	0.168013	1.08331	0.992056	1.18295	0.908649
finn-pQTL-s-R10-seq_7918_114	ukb-saige-153	Colorectal cancer || id:ukb-saige-153	AMY1A	Inverse variance weighted	2	-0.0726738	0.126885	0.566813	-0.321369	0.176022	0.929904	0.725155	1.19246	0.908649
finn-pQTL-s-R10-seq_7948_129	ukb-saige-153	Colorectal cancer || id:ukb-saige-153	GLTPD2	Inverse variance weighted	2	-0.0487525	0.0599327	0.415958	-0.166221	0.0687156	0.952417	0.846859	1.07113	0.908649
finn-pQTL-s-R10-seq_8007_19	ukb-saige-153	Colorectal cancer || id:ukb-saige-153	CTSB	Inverse variance weighted	2	0.0234445	0.0338284	0.488283	-0.0428591	0.089748	1.02372	0.958046	1.0939	0.908649
finn-pQTL-s-R10-seq_8014_359	ukb-saige-153	Colorectal cancer || id:ukb-saige-153	MANEA	Inverse variance weighted	2	-0.0206409	0.0227435	0.364114	-0.0652181	0.0239363	0.979571	0.936863	1.02423	0.908649
finn-pQTL-s-R10-seq_8246_9	ukb-saige-153	Colorectal cancer || id:ukb-saige-153	PCSK9	Inverse variance weighted	2	-0.0407223	0.0704315	0.56314	-0.178768	0.0973234	0.960096	0.8363	1.10222	0.908649
finn-pQTL-s-R10-seq_8295_16	ukb-saige-153	Colorectal cancer || id:ukb-saige-153	OLFM2	Inverse variance weighted	2	0.0363644	0.0274031	0.184504	-0.0173458	0.0900745	1.03703	0.982804	1.09426	0.908649
finn-pQTL-s-R10-seq_8385_248	ukb-saige-153	Colorectal cancer || id:ukb-saige-153	HGFAC	Inverse variance weighted	2	0.0282195	0.0222997	0.205704	-0.0154879	0.071927	1.02862	0.984631	1.07458	0.908649
finn-pQTL-s-R10-seq_8465_52	ukb-saige-153	Colorectal cancer || id:ukb-saige-153	CTSH	Inverse variance weighted	2	0.0212844	0.0263723	0.419623	-0.0304052	0.0729741	1.02151	0.970052	1.0757	0.908649
finn-pQTL-s-R10-seq_8814_33	ukb-saige-153	Colorectal cancer || id:ukb-saige-153	PSAPL1	Inverse variance weighted	2	0.0463988	0.0405123	0.252085	-0.0330054	0.125803	1.04749	0.967533	1.13406	0.908649
finn-pQTL-s-R10-seq_8840_61	ukb-saige-153	Colorectal cancer || id:ukb-saige-153	C1S	Inverse variance weighted	2	0.0836481	0.115356	0.46837	-0.142449	0.309745	1.08725	0.867232	1.36308	0.908649
finn-pQTL-s-R10-seq_8960_3	ukb-saige-153	Colorectal cancer || id:ukb-saige-153	ERAP2	Inverse variance weighted	3	-0.0317282	0.0187525	0.0906567	-0.0684832	0.00502674	0.96877	0.933809	1.00504	0.908649
finn-pQTL-s-R10-seq_9253_52	ukb-saige-153	Colorectal cancer || id:ukb-saige-153	ABO	Inverse variance weighted	2	0.0167033	0.019437	0.390144	-0.0213932	0.0547998	1.01684	0.978834	1.05633	0.908649
finn-pQTL-s-R10-seq_9370_69	ukb-saige-153	Colorectal cancer || id:ukb-saige-153	GGH	Inverse variance weighted	2	-0.0350635	0.0626019	0.575409	-0.157763	0.0876362	0.965544	0.854052	1.09159	0.908649
finn-pQTL-s-R10-seq_9604_14	ukb-saige-153	Colorectal cancer || id:ukb-saige-153	CDH11	Inverse variance weighted	2	-0.0169651	0.031519	0.590404	-0.0787423	0.0448121	0.983178	0.924278	1.04583	0.908649
finn-pQTL-s-R10-seq_10037_98	ukb-saige-153	Colorectal cancer || id:ukb-saige-153	SIGLEC12	Wald ratio	1	0.0270922	0.0270922	0.317311	-0.0260085	0.0801928	1.02746	0.974327	1.0835	0.910543
finn-pQTL-s-R10-seq_15560_52	ukb-saige-153	Colorectal cancer || id:ukb-saige-153	TCN2	Wald ratio	1	0.0184578	0.0184578	0.317311	-0.0177195	0.0546351	1.01863	0.982437	1.05616	0.910543
finn-pQTL-s-R10-seq_19787_14	ukb-saige-153	Colorectal cancer || id:ukb-saige-153	MERTK	Wald ratio	1	-0.0620974	0.0620974	0.317311	-0.183808	0.0596136	0.939791	0.832095	1.06143	0.910543
finn-pQTL-s-R10-seq_24717_26	ukb-saige-153	Colorectal cancer || id:ukb-saige-153	PTPA	Wald ratio	1	-0.0456574	0.0456574	0.317311	-0.135146	0.0438311	0.955369	0.873588	1.04481	0.910543
finn-pQTL-s-R10-seq_4336_2	ukb-saige-153	Colorectal cancer || id:ukb-saige-153	SAA1	Wald ratio	1	0.02392	0.02392	0.317311	-0.0229632	0.0708032	1.02421	0.977298	1.07337	0.910543
finn-pQTL-s-R10-seq_4546_27	ukb-saige-153	Colorectal cancer || id:ukb-saige-153	ADGRE2	Wald ratio	1	0.0615351	0.0615351	0.317311	-0.0590737	0.182144	1.06347	0.942637	1.19979	0.910543
finn-pQTL-s-R10-seq_5129_12	ukb-saige-153	Colorectal cancer || id:ukb-saige-153	SCARF1	Wald ratio	1	-0.0325282	0.0325282	0.317311	-0.0962834	0.031227	0.967995	0.908207	1.03172	0.910543
finn-pQTL-s-R10-seq_5722_78	ukb-saige-153	Colorectal cancer || id:ukb-saige-153	PRCP	Wald ratio	1	0.07063	0.07063	0.317311	-0.0678048	0.209065	1.07318	0.934443	1.23252	0.910543
finn-pQTL-s-R10-seq_6715_63	ukb-saige-153	Colorectal cancer || id:ukb-saige-153	ALPG	Wald ratio	1	-0.0787227	0.0787227	0.317311	-0.233019	0.0755738	0.924296	0.792138	1.0785	0.910543
finn-pQTL-s-R10-seq_7655_11	ukb-saige-153	Colorectal cancer || id:ukb-saige-153	NPPB	Wald ratio	1	-0.0676627	0.0676627	0.317311	-0.200282	0.0649562	0.934576	0.8185	1.06711	0.910543
finn-pQTL-s-R10-seq_7808_5	ukb-saige-153	Colorectal cancer || id:ukb-saige-153	GLCE	Wald ratio	1	0.0396437	0.0396437	0.317311	-0.0380579	0.117345	1.04044	0.962657	1.12451	0.910543
finn-pQTL-s-R10-seq_11361_73	ukb-saige-153	Colorectal cancer || id:ukb-saige-153	TYMP	Wald ratio	1	0.060901	0.0636692	0.338809	-0.0638907	0.185693	1.06279	0.938108	1.20405	0.910776
finn-pQTL-s-R10-seq_13132_14	ukb-saige-153	Colorectal cancer || id:ukb-saige-153	SEMA5A	Wald ratio	1	-0.0240094	0.0246954	0.33094	-0.0724125	0.0243936	0.976276	0.930147	1.02469	0.910776
finn-pQTL-s-R10-seq_14077_6	ukb-saige-153	Colorectal cancer || id:ukb-saige-153	FCN3	Wald ratio	1	-0.0729492	0.0749208	0.330213	-0.219794	0.0738956	0.929648	0.802684	1.07669	0.910776
finn-pQTL-s-R10-seq_15511_37	ukb-saige-153	Colorectal cancer || id:ukb-saige-153	NPTXR	Wald ratio	1	0.0502458	0.0529618	0.342764	-0.0535593	0.154051	1.05153	0.94785	1.16655	0.910776
finn-pQTL-s-R10-seq_15523_9	ukb-saige-153	Colorectal cancer || id:ukb-saige-153	ALAD	Wald ratio	1	0.0610804	0.0642127	0.341493	-0.0647765	0.186937	1.06298	0.937277	1.20555	0.910776
finn-pQTL-s-R10-seq_17766_5	ukb-saige-153	Colorectal cancer || id:ukb-saige-153	NCF1	Wald ratio	1	-0.0389923	0.0401391	0.331335	-0.117665	0.0396804	0.961758	0.888994	1.04048	0.910776
finn-pQTL-s-R10-seq_19213_1	ukb-saige-153	Colorectal cancer || id:ukb-saige-153	SPINK4	Wald ratio	1	-0.0534871	0.0553315	0.333711	-0.161937	0.0549626	0.947918	0.850495	1.0565	0.910776
finn-pQTL-s-R10-seq_20091_138	ukb-saige-153	Colorectal cancer || id:ukb-saige-153	EFNA1	Wald ratio	1	0.073377	0.0770458	0.340904	-0.0776329	0.224387	1.07614	0.925304	1.25156	0.910776
finn-pQTL-s-R10-seq_24474_12	ukb-saige-153	Colorectal cancer || id:ukb-saige-153	TTC9	Wald ratio	1	-0.0700164	0.0728171	0.336281	-0.212738	0.0727051	0.932378	0.808368	1.07541	0.910776
finn-pQTL-s-R10-seq_2888_49	ukb-saige-153	Colorectal cancer || id:ukb-saige-153	C7	Wald ratio	1	-0.0647163	0.0667708	0.33243	-0.195587	0.0661545	0.937333	0.822352	1.06839	0.910776
finn-pQTL-s-R10-seq_4911_49	ukb-saige-153	Colorectal cancer || id:ukb-saige-153	GSTP1	Wald ratio	1	0.0489984	0.0513317	0.339808	-0.0516117	0.149609	1.05022	0.949698	1.16138	0.910776
finn-pQTL-s-R10-seq_4924_32	ukb-saige-153	Colorectal cancer || id:ukb-saige-153	MMP1	Wald ratio	1	-0.062338	0.0653065	0.339808	-0.190339	0.0656627	0.939565	0.826679	1.06787	0.910776
finn-pQTL-s-R10-seq_4968_50	ukb-saige-153	Colorectal cancer || id:ukb-saige-153	CAPG	Wald ratio	1	-0.0656909	0.0693814	0.343736	-0.201678	0.0702966	0.93642	0.817358	1.07283	0.910776
finn-pQTL-s-R10-seq_5671_1	ukb-saige-153	Colorectal cancer || id:ukb-saige-153	CTRB1	Wald ratio	1	0.040732	0.042503	0.337895	-0.0425738	0.124038	1.04157	0.95832	1.13206	0.910776
finn-pQTL-s-R10-seq_7916_10	ukb-saige-153	Colorectal cancer || id:ukb-saige-153	S100A7	Wald ratio	1	-0.0268217	0.0274048	0.327717	-0.080535	0.0268917	0.973535	0.922623	1.02726	0.910776
finn-pQTL-s-R10-seq_8528_74	ukb-saige-153	Colorectal cancer || id:ukb-saige-153	ISLR2	Wald ratio	1	0.0747802	0.0783412	0.339808	-0.0787685	0.228329	1.07765	0.924254	1.2565	0.910776
finn-pQTL-s-R10-seq_8620_56	ukb-saige-153	Colorectal cancer || id:ukb-saige-153	KLK14	Wald ratio	1	-0.0722791	0.0744049	0.331335	-0.218113	0.0735546	0.930271	0.804035	1.07633	0.910776
finn-pQTL-s-R10-seq_8953_47	ukb-saige-153	Colorectal cancer || id:ukb-saige-153	HDGF	Wald ratio	1	0.0757302	0.0791725	0.338809	-0.0794479	0.230908	1.07867	0.923626	1.25974	0.910776
finn-pQTL-s-R10-seq_8997_4	ukb-saige-153	Colorectal cancer || id:ukb-saige-153	NPTXR	Wald ratio	1	0.0607678	0.0640526	0.342764	-0.0647752	0.186311	1.06265	0.937278	1.2048	0.910776
finn-pQTL-s-R10-seq_9213_24	ukb-saige-153	Colorectal cancer || id:ukb-saige-153	FTCD	Wald ratio	1	-0.112091	0.113789	0.324587	-0.335118	0.110936	0.893963	0.715254	1.11732	0.910776
finn-pQTL-s-R10-seq_9352_86	ukb-saige-153	Colorectal cancer || id:ukb-saige-153	REG3G	Wald ratio	1	-0.0796275	0.0828126	0.336281	-0.24194	0.0826852	0.92346	0.785103	1.0862	0.910776
finn-pQTL-s-R10-seq_8398_277	ukb-saige-153	Colorectal cancer || id:ukb-saige-153	RARRES1	Inverse variance weighted	2	-0.0109683	0.0225192	0.626212	-0.0551061	0.0331694	0.989092	0.946385	1.03373	0.91427
finn-pQTL-s-R10-seq_5637_81	ukb-saige-153	Colorectal cancer || id:ukb-saige-153	NTNG1	Wald ratio	1	-0.0329464	0.0350493	0.347218	-0.101643	0.0357503	0.96759	0.903352	1.0364	0.916654
finn-pQTL-s-R10-seq_10460_1	ukb-saige-153	Colorectal cancer || id:ukb-saige-153	CHIT1	Wald ratio	1	0.0182843	0.0274265	0.504985	-0.0354715	0.0720402	1.01845	0.96515	1.0747	0.918642
finn-pQTL-s-R10-seq_10672_75	ukb-saige-153	Colorectal cancer || id:ukb-saige-153	SFTPB	Wald ratio	1	0.0332201	0.0387568	0.391366	-0.0427432	0.109183	1.03378	0.958157	1.11537	0.918642
finn-pQTL-s-R10-seq_10754_113	ukb-saige-153	Colorectal cancer || id:ukb-saige-153	PROK2	Wald ratio	1	-0.0236272	0.0413476	0.567709	-0.104669	0.0574141	0.97665	0.900623	1.05909	0.918642
finn-pQTL-s-R10-seq_10832_24	ukb-saige-153	Colorectal cancer || id:ukb-saige-153	B4GALT6	Wald ratio	1	-0.02363	0.0386673	0.541126	-0.0994178	0.0521578	0.976647	0.905364	1.05354	0.918642
finn-pQTL-s-R10-seq_10980_11	ukb-saige-153	Colorectal cancer || id:ukb-saige-153	ACHE	Wald ratio	1	0.0325665	0.0427436	0.446117	-0.0512109	0.116344	1.0331	0.950078	1.12338	0.918642
finn-pQTL-s-R10-seq_11103_24	ukb-saige-153	Colorectal cancer || id:ukb-saige-153	HSPB1	Wald ratio	1	-0.0220582	0.0424196	0.603064	-0.105201	0.0610842	0.978183	0.900144	1.06299	0.918642
finn-pQTL-s-R10-seq_11104_13	ukb-saige-153	Colorectal cancer || id:ukb-saige-153	CHI3L1	Wald ratio	1	-0.0166426	0.0249639	0.504985	-0.0655717	0.0322866	0.983495	0.936532	1.03281	0.918642
finn-pQTL-s-R10-seq_11109_56	ukb-saige-153	Colorectal cancer || id:ukb-saige-153	SVEP1	Wald ratio	1	-0.0435368	0.0609515	0.475051	-0.163002	0.0759281	0.957397	0.84959	1.07888	0.918642
finn-pQTL-s-R10-seq_11152_46	ukb-saige-153	Colorectal cancer || id:ukb-saige-153	KLK13	Wald ratio	1	0.0381329	0.0466069	0.413253	-0.0532166	0.129482	1.03887	0.948175	1.13824	0.918642
finn-pQTL-s-R10-seq_11219_95	ukb-saige-153	Colorectal cancer || id:ukb-saige-153	FGFBP3	Wald ratio	1	0.0384181	0.0600283	0.522173	-0.0792374	0.156074	1.03917	0.923821	1.16891	0.918642
finn-pQTL-s-R10-seq_11246_3	ukb-saige-153	Colorectal cancer || id:ukb-saige-153	BPIFB1	Wald ratio	1	0.0423284	0.0490119	0.387788	-0.0537348	0.138392	1.04324	0.947683	1.14843	0.918642
finn-pQTL-s-R10-seq_11302_237	ukb-saige-153	Colorectal cancer || id:ukb-saige-153	TNR	Wald ratio	1	0.0390423	0.0780845	0.617075	-0.114003	0.192088	1.03981	0.892255	1.21178	0.918642
finn-pQTL-s-R10-seq_11510_31	ukb-saige-153	Colorectal cancer || id:ukb-saige-153	APOL1	Wald ratio	1	0.0270674	0.0518793	0.601852	-0.0746159	0.128751	1.02744	0.9281	1.13741	0.918642
finn-pQTL-s-R10-seq_11510_51	ukb-saige-153	Colorectal cancer || id:ukb-saige-153	APOL1	Wald ratio	1	0.0199438	0.0382255	0.601852	-0.0549783	0.0948658	1.02014	0.946506	1.09951	0.918642
finn-pQTL-s-R10-seq_12334_25	ukb-saige-153	Colorectal cancer || id:ukb-saige-153	SHMT1	Wald ratio	1	0.0419456	0.0512669	0.413253	-0.0585374	0.142429	1.04284	0.943143	1.15307	0.918642
finn-pQTL-s-R10-seq_12396_19	ukb-saige-153	Colorectal cancer || id:ukb-saige-153	HIBCH	Wald ratio	1	-0.0288531	0.0423179	0.495354	-0.111796	0.05409	0.971559	0.894226	1.05558	0.918642
finn-pQTL-s-R10-seq_12594_5	ukb-saige-153	Colorectal cancer || id:ukb-saige-153	GCA	Wald ratio	1	-0.0492981	0.0664453	0.458126	-0.179531	0.0809347	0.951897	0.835662	1.0843	0.918642
finn-pQTL-s-R10-seq_13093_6	ukb-saige-153	Colorectal cancer || id:ukb-saige-153	SECTM1	Wald ratio	1	-0.0520936	0.0636699	0.413253	-0.176887	0.0726995	0.94924	0.837875	1.07541	0.918642
finn-pQTL-s-R10-seq_13122_19	ukb-saige-153	Colorectal cancer || id:ukb-saige-153	FLRT2	Wald ratio	1	-0.0454527	0.0738607	0.538301	-0.19022	0.0993142	0.955565	0.826777	1.10441	0.918642
finn-pQTL-s-R10-seq_13543_7	ukb-saige-153	Colorectal cancer || id:ukb-saige-153	PTGR1	Wald ratio	1	-0.0252363	0.0491785	0.607841	-0.121626	0.0711536	0.975079	0.885479	1.07375	0.918642
finn-pQTL-s-R10-seq_13717_15	ukb-saige-153	Colorectal cancer || id:ukb-saige-153	FCN2	Wald ratio	1	-0.0265069	0.0342381	0.438816	-0.0936136	0.0405998	0.973841	0.910635	1.04144	0.918642
finn-pQTL-s-R10-seq_13748_4	ukb-saige-153	Colorectal cancer || id:ukb-saige-153	CCL8	Wald ratio	1	-0.017183	0.0276836	0.534804	-0.0714429	0.037077	0.982964	0.931049	1.03777	0.918642
finn-pQTL-s-R10-seq_14006_36	ukb-saige-153	Colorectal cancer || id:ukb-saige-153	GNMT	Wald ratio	1	-0.0384968	0.0445752	0.387788	-0.125864	0.0488706	0.962235	0.881735	1.05008	0.918642
finn-pQTL-s-R10-seq_14048_7	ukb-saige-153	Colorectal cancer || id:ukb-saige-153	IL1RAP	Wald ratio	1	0.0166524	0.0237891	0.483927	-0.0299743	0.0632791	1.01679	0.97047	1.06532	0.918642
finn-pQTL-s-R10-seq_14054_17	ukb-saige-153	Colorectal cancer || id:ukb-saige-153	IL15RA	Wald ratio	1	-0.0295423	0.0477222	0.535885	-0.123078	0.0639932	0.97089	0.884195	1.06609	0.918642
finn-pQTL-s-R10-seq_14091_42	ukb-saige-153	Colorectal cancer || id:ukb-saige-153	CBR3	Wald ratio	1	0.0164668	0.0329335	0.617075	-0.048083	0.0810165	1.0166	0.953055	1.08439	0.918642
finn-pQTL-s-R10-seq_14100_63	ukb-saige-153	Colorectal cancer || id:ukb-saige-153	C1QC	Wald ratio	1	-0.0360899	0.0478401	0.450617	-0.129856	0.0576767	0.964554	0.878222	1.05937	0.918642
finn-pQTL-s-R10-seq_14102_6	ukb-saige-153	Colorectal cancer || id:ukb-saige-153	GNLY	Wald ratio	1	0.0233595	0.0324437	0.471525	-0.0402302	0.0869492	1.02363	0.960568	1.09084	0.918642
finn-pQTL-s-R10-seq_14109_15	ukb-saige-153	Colorectal cancer || id:ukb-saige-153	CCL15	Wald ratio	1	-0.0214565	0.0295952	0.468452	-0.0794631	0.0365501	0.978772	0.923612	1.03723	0.918642
finn-pQTL-s-R10-seq_15300_66	ukb-saige-153	Colorectal cancer || id:ukb-saige-153	CCDC134	Wald ratio	1	-0.0417891	0.05746	0.467059	-0.154411	0.0708325	0.959072	0.85692	1.0734	0.918642
finn-pQTL-s-R10-seq_15367_38	ukb-saige-153	Colorectal cancer || id:ukb-saige-153	BPIFB1	Wald ratio	1	0.0431072	0.0499136	0.387788	-0.0547234	0.140938	1.04405	0.946747	1.15135	0.918642
finn-pQTL-s-R10-seq_15370_5	ukb-saige-153	Colorectal cancer || id:ukb-saige-153	BOLA1	Wald ratio	1	0.0250148	0.0361325	0.488744	-0.0458049	0.0958346	1.02533	0.955228	1.10058	0.918642
finn-pQTL-s-R10-seq_15391_114	ukb-saige-153	Colorectal cancer || id:ukb-saige-153	GAS6	Wald ratio	1	-0.0460788	0.0623419	0.459828	-0.168269	0.0761114	0.954967	0.845126	1.07908	0.918642
finn-pQTL-s-R10-seq_15395_15	ukb-saige-153	Colorectal cancer || id:ukb-saige-153	GSTM1	Wald ratio	1	-0.037099	0.0423989	0.381574	-0.120201	0.0460028	0.963581	0.886742	1.04708	0.918642
finn-pQTL-s-R10-seq_15480_2	ukb-saige-153	Colorectal cancer || id:ukb-saige-153	VNN2	Wald ratio	1	0.019811	0.0325467	0.542726	-0.0439805	0.0836026	1.02001	0.956973	1.0872	0.918642
finn-pQTL-s-R10-seq_15486_126	ukb-saige-153	Colorectal cancer || id:ukb-saige-153	AOC1	Wald ratio	1	-0.0122884	0.0258057	0.633939	-0.0628675	0.0382907	0.987787	0.939068	1.03903	0.918642
finn-pQTL-s-R10-seq_15514_26	ukb-saige-153	Colorectal cancer || id:ukb-saige-153	BCHE	Wald ratio	1	0.0464707	0.0573468	0.417742	-0.0659291	0.15887	1.04757	0.936197	1.17219	0.918642
finn-pQTL-s-R10-seq_15521_4	ukb-saige-153	Colorectal cancer || id:ukb-saige-153	CLSTN1	Wald ratio	1	0.020546	0.0281556	0.465555	-0.034639	0.075731	1.02076	0.965954	1.07867	0.918642
finn-pQTL-s-R10-seq_16055_3	ukb-saige-153	Colorectal cancer || id:ukb-saige-153	CFHR5	Wald ratio	1	-0.0343409	0.0586657	0.558302	-0.149326	0.0806439	0.966242	0.861289	1.08398	0.918642
finn-pQTL-s-R10-seq_16616_137	ukb-saige-153	Colorectal cancer || id:ukb-saige-153	ENO3	Wald ratio	1	-0.0316637	0.0662059	0.632465	-0.161427	0.0980999	0.968832	0.850928	1.10307	0.918642
finn-pQTL-s-R10-seq_16770_3	ukb-saige-153	Colorectal cancer || id:ukb-saige-153	REG1B	Wald ratio	1	-0.050414	0.0652416	0.439684	-0.178288	0.0774596	0.950836	0.836702	1.08054	0.918642
finn-pQTL-s-R10-seq_16914_104	ukb-saige-153	Colorectal cancer || id:ukb-saige-153	CD14	Wald ratio	1	-0.0371828	0.0774641	0.631227	-0.189012	0.114647	0.9635	0.827776	1.12148	0.918642
finn-pQTL-s-R10-seq_16918_198	ukb-saige-153	Colorectal cancer || id:ukb-saige-153	TLR3	Wald ratio	1	-0.0506001	0.0742135	0.495354	-0.196059	0.0948584	0.950659	0.821964	1.0995	0.918642
finn-pQTL-s-R10-seq_17205_21	ukb-saige-153	Colorectal cancer || id:ukb-saige-153	RAB5A	Wald ratio	1	-0.125809	0.162334	0.43834	-0.443983	0.192365	0.881784	0.641477	1.21211	0.918642
finn-pQTL-s-R10-seq_17210_2	ukb-saige-153	Colorectal cancer || id:ukb-saige-153	TCL1A	Wald ratio	1	-0.0483417	0.0604271	0.423711	-0.166779	0.0700954	0.952808	0.846387	1.07261	0.918642
finn-pQTL-s-R10-seq_17224_12	ukb-saige-153	Colorectal cancer || id:ukb-saige-153	OGN	Wald ratio	1	0.023119	0.0391245	0.554581	-0.053565	0.099803	1.02339	0.947844	1.10495	0.918642
finn-pQTL-s-R10-seq_17455_42	ukb-saige-153	Colorectal cancer || id:ukb-saige-153	FOLR1	Wald ratio	1	0.148187	0.200488	0.459828	-0.24477	0.541144	1.15973	0.782885	1.71797	0.918642
finn-pQTL-s-R10-seq_17692_2	ukb-saige-153	Colorectal cancer || id:ukb-saige-153	BTN3A3	Wald ratio	1	-0.0271272	0.0442601	0.53994	-0.113877	0.0596226	0.973237	0.892368	1.06144	0.918642
finn-pQTL-s-R10-seq_17702_53	ukb-saige-153	Colorectal cancer || id:ukb-saige-153	UGT1A1	Wald ratio	1	-0.0196318	0.0410483	0.632465	-0.100087	0.0608229	0.98056	0.904759	1.06271	0.918642
finn-pQTL-s-R10-seq_17755_5	ukb-saige-153	Colorectal cancer || id:ukb-saige-153	UGDH	Wald ratio	1	0.0526897	0.0605931	0.384538	-0.0660729	0.171452	1.0541	0.936063	1.18703	0.918642
finn-pQTL-s-R10-seq_17814_8	ukb-saige-153	Colorectal cancer || id:ukb-saige-153	BPNT1	Wald ratio	1	-0.0691679	0.124148	0.57743	-0.312497	0.174161	0.93317	0.731618	1.19025	0.918642
finn-pQTL-s-R10-seq_18216_22	ukb-saige-153	Colorectal cancer || id:ukb-saige-153	IL11RA	Wald ratio	1	0.0418641	0.0720062	0.560974	-0.099268	0.182996	1.04275	0.9055	1.20081	0.918642
finn-pQTL-s-R10-seq_18218_48	ukb-saige-153	Colorectal cancer || id:ukb-saige-153	CNRIP1	Wald ratio	1	-0.0355581	0.0380979	0.350648	-0.11023	0.0391139	0.965067	0.895628	1.03989	0.918642
finn-pQTL-s-R10-seq_18243_9	ukb-saige-153	Colorectal cancer || id:ukb-saige-153	CMPK1	Wald ratio	1	-0.0518222	0.0567576	0.36122	-0.163067	0.0594228	0.949498	0.849534	1.06122	0.918642
finn-pQTL-s-R10-seq_18319_7	ukb-saige-153	Colorectal cancer || id:ukb-saige-153	PDHX	Wald ratio	1	0.0453586	0.0695499	0.514289	-0.0909591	0.181676	1.0464	0.913055	1.19923	0.918642
finn-pQTL-s-R10-seq_18338_26	ukb-saige-153	Colorectal cancer || id:ukb-saige-153	IDH1	Wald ratio	1	0.0353814	0.0643942	0.582696	-0.0908313	0.161594	1.03601	0.913172	1.17538	0.918642
finn-pQTL-s-R10-seq_18340_2	ukb-saige-153	Colorectal cancer || id:ukb-saige-153	PSMB4	Wald ratio	1	-0.0403688	0.0594909	0.497409	-0.156971	0.0762334	0.960435	0.854729	1.07921	0.918642
finn-pQTL-s-R10-seq_18871_24	ukb-saige-153	Colorectal cancer || id:ukb-saige-153	AIF1L	Wald ratio	1	0.0258924	0.0478013	0.588048	-0.0677982	0.119583	1.02623	0.934449	1.12703	0.918642
finn-pQTL-s-R10-seq_18875_125	ukb-saige-153	Colorectal cancer || id:ukb-saige-153	COL2A1	Wald ratio	1	0.0307733	0.0376118	0.413253	-0.0429458	0.104492	1.03125	0.957963	1.11015	0.918642
finn-pQTL-s-R10-seq_18882_7	ukb-saige-153	Colorectal cancer || id:ukb-saige-153	CLSTN2	Wald ratio	1	0.0368117	0.0769699	0.632465	-0.114049	0.187673	1.0375	0.892214	1.20644	0.918642
finn-pQTL-s-R10-seq_18895_54	ukb-saige-153	Colorectal cancer || id:ukb-saige-153	GSTM4	Wald ratio	1	-0.0565215	0.064596	0.381574	-0.18313	0.0700867	0.945046	0.83266	1.0726	0.918642
finn-pQTL-s-R10-seq_19135_5	ukb-saige-153	Colorectal cancer || id:ukb-saige-153	NT5C3B	Wald ratio	1	-0.0370988	0.0768475	0.629267	-0.18772	0.113522	0.963581	0.828847	1.12022	0.918642
finn-pQTL-s-R10-seq_19154_41	ukb-saige-153	Colorectal cancer || id:ukb-saige-153	SERPINE2	Wald ratio	1	-0.0270985	0.0451642	0.548506	-0.11562	0.0614233	0.973265	0.890813	1.06335	0.918642
finn-pQTL-s-R10-seq_19365_11	ukb-saige-153	Colorectal cancer || id:ukb-saige-153	BCAT2	Wald ratio	1	-0.0322469	0.0383892	0.400908	-0.10749	0.0429959	0.968267	0.898086	1.04393	0.918642
finn-pQTL-s-R10-seq_19437_61	ukb-saige-153	Colorectal cancer || id:ukb-saige-153	VEGFA	Wald ratio	1	-0.0301827	0.0474299	0.524539	-0.123145	0.06278	0.970268	0.884135	1.06479	0.918642
finn-pQTL-s-R10-seq_19561_216	ukb-saige-153	Colorectal cancer || id:ukb-saige-153	PLXND1	Wald ratio	1	0.0606818	0.0895779	0.49814	-0.114891	0.236254	1.06256	0.891463	1.2665	0.918642
finn-pQTL-s-R10-seq_19590_46	ukb-saige-153	Colorectal cancer || id:ukb-saige-153	SFTPD	Wald ratio	1	-0.0359276	0.0434913	0.408755	-0.121171	0.0493154	0.96471	0.885883	1.05055	0.918642
finn-pQTL-s-R10-seq_19743_12	ukb-saige-153	Colorectal cancer || id:ukb-saige-153	VSTM1	Wald ratio	1	0.048269	0.05335	0.365592	-0.056297	0.152835	1.04945	0.945258	1.16513	0.918642
finn-pQTL-s-R10-seq_19768_13	ukb-saige-153	Colorectal cancer || id:ukb-saige-153	CSTB	Wald ratio	1	-0.0290472	0.0392992	0.459828	-0.106074	0.0479792	0.971371	0.899358	1.04915	0.918642
finn-pQTL-s-R10-seq_20116_30	ukb-saige-153	Colorectal cancer || id:ukb-saige-153	OXSR1	Wald ratio	1	-0.0458836	0.0802962	0.567709	-0.203264	0.111497	0.955153	0.816063	1.11795	0.918642
finn-pQTL-s-R10-seq_20134_27	ukb-saige-153	Colorectal cancer || id:ukb-saige-153	MARCO	Wald ratio	1	-0.0531483	0.0733952	0.468981	-0.197003	0.0907064	0.948239	0.821188	1.09495	0.918642
finn-pQTL-s-R10-seq_20370_6	ukb-saige-153	Colorectal cancer || id:ukb-saige-153	ACYP1	Wald ratio	1	-0.0277992	0.0561658	0.620636	-0.137884	0.0822857	0.972584	0.8712	1.08577	0.918642
finn-pQTL-s-R10-seq_20385_21	ukb-saige-153	Colorectal cancer || id:ukb-saige-153	CPTP	Wald ratio	1	0.14117	0.291073	0.627676	-0.429333	0.711673	1.15162	0.650943	2.0374	0.918642
finn-pQTL-s-R10-seq_20516_11	ukb-saige-153	Colorectal cancer || id:ukb-saige-153	SCN3B	Wald ratio	1	0.029137	0.0485616	0.548506	-0.0660438	0.124318	1.02957	0.93609	1.13238	0.918642
finn-pQTL-s-R10-seq_20550_38	ukb-saige-153	Colorectal cancer || id:ukb-saige-153	NTM	Wald ratio	1	0.0487097	0.0639314	0.446117	-0.0765959	0.174015	1.04992	0.926264	1.19007	0.918642
finn-pQTL-s-R10-seq_20570_18	ukb-saige-153	Colorectal cancer || id:ukb-saige-153	VSTM1	Wald ratio	1	0.0205949	0.0227627	0.365592	-0.0240201	0.0652099	1.02081	0.976266	1.06738	0.918642
finn-pQTL-s-R10-seq_20585_5	ukb-saige-153	Colorectal cancer || id:ukb-saige-153	CD300LG	Wald ratio	1	0.0331518	0.0684424	0.62812	-0.100995	0.167299	1.03371	0.903937	1.18211	0.918642
finn-pQTL-s-R10-seq_21154_8	ukb-saige-153	Colorectal cancer || id:ukb-saige-153	CAB39L	Wald ratio	1	0.0470815	0.0540565	0.383772	-0.0588693	0.153032	1.04821	0.94283	1.16536	0.918642
finn-pQTL-s-R10-seq_21341_19	ukb-saige-153	Colorectal cancer || id:ukb-saige-153	CHMP4A	Wald ratio	1	-0.0414748	0.0791793	0.600411	-0.196666	0.113716	0.959373	0.821465	1.12043	0.918642
finn-pQTL-s-R10-seq_21509_29	ukb-saige-153	Colorectal cancer || id:ukb-saige-153	GLT8D2	Wald ratio	1	0.0449276	0.0909784	0.621428	-0.13339	0.223245	1.04595	0.875124	1.25013	0.918642
finn-pQTL-s-R10-seq_21685_29	ukb-saige-153	Colorectal cancer || id:ukb-saige-153	DCC	Wald ratio	1	-0.0163693	0.0289611	0.571926	-0.073133	0.0403944	0.983764	0.929477	1.04122	0.918642
finn-pQTL-s-R10-seq_21722_21	ukb-saige-153	Colorectal cancer || id:ukb-saige-153	GALNT4	Wald ratio	1	-0.0186902	0.0280354	0.504985	-0.0736395	0.0362591	0.981483	0.929007	1.03692	0.918642
finn-pQTL-s-R10-seq_21887_2	ukb-saige-153	Colorectal cancer || id:ukb-saige-153	CBLN2	Wald ratio	1	0.0394111	0.0566535	0.486647	-0.0716297	0.150452	1.0402	0.930876	1.16236	0.918642
finn-pQTL-s-R10-seq_22430_15	ukb-saige-153	Colorectal cancer || id:ukb-saige-153	CHN1	Wald ratio	1	0.0356515	0.0646183	0.581137	-0.0910004	0.162303	1.03629	0.913017	1.17622	0.918642
finn-pQTL-s-R10-seq_22576_1	ukb-saige-153	Colorectal cancer || id:ukb-saige-153	CD209	Wald ratio	1	-0.0641529	0.0833988	0.441756	-0.227615	0.0993088	0.937862	0.796431	1.10441	0.918642
finn-pQTL-s-R10-seq_22577_24	ukb-saige-153	Colorectal cancer || id:ukb-saige-153	SIGLEC14	Wald ratio	1	-0.0271262	0.0316473	0.391366	-0.0891549	0.0349024	0.973238	0.914704	1.03552	0.918642
finn-pQTL-s-R10-seq_23028_49	ukb-saige-153	Colorectal cancer || id:ukb-saige-153	SDCBP2	Wald ratio	1	0.0662836	0.0864568	0.44328	-0.103172	0.235739	1.06853	0.901972	1.26584	0.918642
finn-pQTL-s-R10-seq_23030_4	ukb-saige-153	Colorectal cancer || id:ukb-saige-153	SIGLEC5	Wald ratio	1	-0.0260112	0.0303464	0.391366	-0.0854901	0.0334677	0.974324	0.918062	1.03403	0.918642
finn-pQTL-s-R10-seq_23148_100	ukb-saige-153	Colorectal cancer || id:ukb-saige-153	LIPG	Wald ratio	1	-0.0498424	0.0712034	0.483927	-0.189401	0.0897163	0.951379	0.827455	1.09386	0.918642
finn-pQTL-s-R10-seq_23257_14	ukb-saige-153	Colorectal cancer || id:ukb-saige-153	COMMD10	Wald ratio	1	0.0639839	0.0696968	0.358602	-0.0726217	0.20059	1.06608	0.929953	1.22212	0.918642
finn-pQTL-s-R10-seq_23320_11	ukb-saige-153	Colorectal cancer || id:ukb-saige-153	MVB12B	Wald ratio	1	-0.0455434	0.0735701	0.535885	-0.189741	0.098654	0.955478	0.827173	1.10368	0.918642
finn-pQTL-s-R10-seq_23326_10	ukb-saige-153	Colorectal cancer || id:ukb-saige-153	GSTA2	Wald ratio	1	0.0525355	0.0575388	0.36122	-0.0602407	0.165312	1.05394	0.941538	1.17976	0.918642
finn-pQTL-s-R10-seq_23581_131	ukb-saige-153	Colorectal cancer || id:ukb-saige-153	GHRL	Wald ratio	1	0.0435008	0.0911445	0.633168	-0.135142	0.222144	1.04446	0.873591	1.24875	0.918642
finn-pQTL-s-R10-seq_23597_11	ukb-saige-153	Colorectal cancer || id:ukb-saige-153	AGFG2	Wald ratio	1	-0.0216357	0.0441035	0.623733	-0.108078	0.0648071	0.978597	0.897557	1.06695	0.918642
finn-pQTL-s-R10-seq_23691_2	ukb-saige-153	Colorectal cancer || id:ukb-saige-153	TTLL12	Wald ratio	1	-0.0391975	0.0495733	0.42912	-0.136361	0.0579662	0.961561	0.872527	1.05968	0.918642
finn-pQTL-s-R10-seq_2418_55	ukb-saige-153	Colorectal cancer || id:ukb-saige-153	APOE	Wald ratio	1	-0.0441774	0.0539946	0.413253	-0.150007	0.061652	0.956784	0.860702	1.06359	0.918642
finn-pQTL-s-R10-seq_24649_11	ukb-saige-153	Colorectal cancer || id:ukb-saige-153	NTAQ1	Wald ratio	1	-0.0441764	0.0694201	0.524539	-0.18024	0.091887	0.956785	0.83507	1.09624	0.918642
finn-pQTL-s-R10-seq_24684_7	ukb-saige-153	Colorectal cancer || id:ukb-saige-153	GIMAP4	Wald ratio	1	-0.0220735	0.0344899	0.522173	-0.0896737	0.0455267	0.978168	0.914229	1.04658	0.918642
finn-pQTL-s-R10-seq_24720_10	ukb-saige-153	Colorectal cancer || id:ukb-saige-153	ANKRD16	Wald ratio	1	0.0667511	0.107543	0.534804	-0.144034	0.277536	1.06903	0.865858	1.31987	0.918642
finn-pQTL-s-R10-seq_25085_37	ukb-saige-153	Colorectal cancer || id:ukb-saige-153	ASPSCR1	Wald ratio	1	0.0378968	0.0490429	0.439684	-0.0582273	0.134021	1.03862	0.943436	1.14342	0.918642
finn-pQTL-s-R10-seq_25297_11	ukb-saige-153	Colorectal cancer || id:ukb-saige-153	SH3PXD2B	Wald ratio	1	-0.0351468	0.0615069	0.567709	-0.1557	0.0854068	0.965464	0.855816	1.08916	0.918642
finn-pQTL-s-R10-seq_25488_6	ukb-saige-153	Colorectal cancer || id:ukb-saige-153	PLEKHO2	Wald ratio	1	-0.0528873	0.0582657	0.364041	-0.167088	0.0613134	0.948487	0.846125	1.06323	0.918642
finn-pQTL-s-R10-seq_2580_83	ukb-saige-153	Colorectal cancer || id:ukb-saige-153	MPO	Wald ratio	1	0.03702	0.0724975	0.609604	-0.105075	0.179115	1.03771	0.900257	1.19616	0.918642
finn-pQTL-s-R10-seq_2597_8	ukb-saige-153	Colorectal cancer || id:ukb-saige-153	VEGFA	Wald ratio	1	-0.0506899	0.0557589	0.363302	-0.159977	0.0585975	0.950573	0.852163	1.06035	0.918642
finn-pQTL-s-R10-seq_2609_59	ukb-saige-153	Colorectal cancer || id:ukb-saige-153	CST3	Wald ratio	1	0.0291388	0.0582775	0.617075	-0.0850852	0.143363	1.02957	0.918434	1.15415	0.918642
finn-pQTL-s-R10-seq_2692_74	ukb-saige-153	Colorectal cancer || id:ukb-saige-153	PLA2G2A	Wald ratio	1	0.0216845	0.0331645	0.513211	-0.0433179	0.0866869	1.02192	0.957607	1.09056	0.918642
finn-pQTL-s-R10-seq_2774_10	ukb-saige-153	Colorectal cancer || id:ukb-saige-153	IL16	Wald ratio	1	-0.0274301	0.0307549	0.372451	-0.0877097	0.0328496	0.972943	0.916027	1.0334	0.918642
finn-pQTL-s-R10-seq_2785_15	ukb-saige-153	Colorectal cancer || id:ukb-saige-153	CCL8	Wald ratio	1	0.0463034	0.0926067	0.617075	-0.135206	0.227813	1.04739	0.873536	1.25585	0.918642
finn-pQTL-s-R10-seq_2789_26	ukb-saige-153	Colorectal cancer || id:ukb-saige-153	MMP7	Wald ratio	1	0.0625755	0.0671542	0.35143	-0.0690468	0.194198	1.06457	0.933283	1.21434	0.918642
finn-pQTL-s-R10-seq_2797_56	ukb-saige-153	Colorectal cancer || id:ukb-saige-153	APOB	Wald ratio	1	-0.0770217	0.115533	0.504985	-0.303465	0.149422	0.92587	0.738255	1.16116	0.918642
finn-pQTL-s-R10-seq_2816_50	ukb-saige-153	Colorectal cancer || id:ukb-saige-153	BCAM	Wald ratio	1	0.0618645	0.103108	0.548506	-0.140226	0.263955	1.06382	0.869162	1.30207	0.918642
finn-pQTL-s-R10-seq_2831_29	ukb-saige-153	Colorectal cancer || id:ukb-saige-153	KLK11	Wald ratio	1	-0.021137	0.0274781	0.441756	-0.0749942	0.0327201	0.979085	0.927749	1.03326	0.918642
finn-pQTL-s-R10-seq_2937_10	ukb-saige-153	Colorectal cancer || id:ukb-saige-153	APOE	Wald ratio	1	-0.0379708	0.0464087	0.413253	-0.128932	0.0529903	0.962741	0.879034	1.05442	0.918642
finn-pQTL-s-R10-seq_2938_55	ukb-saige-153	Colorectal cancer || id:ukb-saige-153	APOE	Wald ratio	1	-0.0374664	0.0457922	0.413253	-0.127219	0.0522864	0.963227	0.880541	1.05368	0.918642
finn-pQTL-s-R10-seq_3029_52	ukb-saige-153	Colorectal cancer || id:ukb-saige-153	CD209	Wald ratio	1	-0.0532961	0.0692849	0.441756	-0.189095	0.0825024	0.948099	0.827708	1.086	0.918642
finn-pQTL-s-R10-seq_3040_59	ukb-saige-153	Colorectal cancer || id:ukb-saige-153	CCL3	Wald ratio	1	-0.0233758	0.0467515	0.617075	-0.115009	0.0682572	0.976895	0.891358	1.07064	0.918642
finn-pQTL-s-R10-seq_3044_3	ukb-saige-153	Colorectal cancer || id:ukb-saige-153	CCL18	Wald ratio	1	-0.0171523	0.0343047	0.617075	-0.0843895	0.0500848	0.982994	0.919073	1.05136	0.918642
finn-pQTL-s-R10-seq_3050_7	ukb-saige-153	Colorectal cancer || id:ukb-saige-153	VWF	Wald ratio	1	-0.0455741	0.0702289	0.51638	-0.183223	0.0920746	0.955449	0.832583	1.09645	0.918642
finn-pQTL-s-R10-seq_3061_61	ukb-saige-153	Colorectal cancer || id:ukb-saige-153	CTSB	Wald ratio	1	0.0327253	0.0462004	0.478738	-0.0578275	0.123278	1.03327	0.943813	1.1312	0.918642
finn-pQTL-s-R10-seq_3066_12	ukb-saige-153	Colorectal cancer || id:ukb-saige-153	LGALS3	Wald ratio	1	0.0328049	0.053308	0.538301	-0.0716788	0.137289	1.03335	0.93083	1.14716	0.918642
finn-pQTL-s-R10-seq_3077_66	ukb-saige-153	Colorectal cancer || id:ukb-saige-153	F10	Wald ratio	1	-0.0385865	0.0643108	0.548506	-0.164636	0.0874627	0.962148	0.848203	1.0914	0.918642
finn-pQTL-s-R10-seq_3079_62	ukb-saige-153	Colorectal cancer || id:ukb-saige-153	RARRES2	Wald ratio	1	0.0435985	0.0615508	0.478738	-0.077041	0.164238	1.04456	0.925852	1.17849	0.918642
finn-pQTL-s-R10-seq_3173_49	ukb-saige-153	Colorectal cancer || id:ukb-saige-153	NAAA	Wald ratio	1	0.0288956	0.0364997	0.428555	-0.0426438	0.100435	1.02932	0.958253	1.10565	0.918642
finn-pQTL-s-R10-seq_3181_50	ukb-saige-153	Colorectal cancer || id:ukb-saige-153	CTSS	Wald ratio	1	0.0275805	0.0436691	0.527662	-0.058011	0.113172	1.02796	0.94364	1.11982	0.918642
finn-pQTL-s-R10-seq_3195_50	ukb-saige-153	Colorectal cancer || id:ukb-saige-153	GNLY	Wald ratio	1	0.0285019	0.039586	0.471525	-0.0490867	0.106091	1.02891	0.952099	1.11192	0.918642
finn-pQTL-s-R10-seq_3232_28	ukb-saige-153	Colorectal cancer || id:ukb-saige-153	ACP5	Wald ratio	1	0.0638454	0.0704501	0.364804	-0.0742368	0.201928	1.06593	0.928452	1.22376	0.918642
finn-pQTL-s-R10-seq_3290_50	ukb-saige-153	Colorectal cancer || id:ukb-saige-153	CD109	Wald ratio	1	-0.0245456	0.030321	0.418214	-0.0839748	0.0348836	0.975753	0.919454	1.0355	0.918642
finn-pQTL-s-R10-seq_3314_74	ukb-saige-153	Colorectal cancer || id:ukb-saige-153	GFRA1	Wald ratio	1	0.0427619	0.0546403	0.433857	-0.064333	0.149857	1.04369	0.937693	1.16167	0.918642
finn-pQTL-s-R10-seq_3366_51	ukb-saige-153	Colorectal cancer || id:ukb-saige-153	ECM1	Wald ratio	1	-0.0195364	0.0268626	0.467059	-0.0721871	0.0331142	0.980653	0.930357	1.03367	0.918642
finn-pQTL-s-R10-seq_3367_8	ukb-saige-153	Colorectal cancer || id:ukb-saige-153	FETUB	Wald ratio	1	-0.0356506	0.062545	0.568678	-0.158239	0.0869375	0.964977	0.853646	1.09083	0.918642
finn-pQTL-s-R10-seq_3389_7	ukb-saige-153	Colorectal cancer || id:ukb-saige-153	SERPINA5	Wald ratio	1	-0.0365105	0.0597444	0.541126	-0.153609	0.0805885	0.964148	0.857607	1.08392	0.918642
finn-pQTL-s-R10-seq_3403_1	ukb-saige-153	Colorectal cancer || id:ukb-saige-153	TPSB2	Wald ratio	1	0.0410411	0.0726111	0.571926	-0.101277	0.183359	1.04189	0.903683	1.20125	0.918642
finn-pQTL-s-R10-seq_3431_54	ukb-saige-153	Colorectal cancer || id:ukb-saige-153	EPHA1	Wald ratio	1	-0.0179746	0.0334981	0.591554	-0.0836309	0.0476817	0.982186	0.919771	1.04884	0.918642
finn-pQTL-s-R10-seq_3484_60	ukb-saige-153	Colorectal cancer || id:ukb-saige-153	AGT	Wald ratio	1	-0.0521839	0.0770334	0.49814	-0.203169	0.0988015	0.949154	0.81614	1.10385	0.918642
finn-pQTL-s-R10-seq_3580_25	ukb-saige-153	Colorectal cancer || id:ukb-saige-153	SERPINA1	Wald ratio	1	0.0279102	0.0418653	0.504985	-0.0541458	0.109966	1.0283	0.947294	1.11624	0.918642
finn-pQTL-s-R10-seq_3651_50	ukb-saige-153	Colorectal cancer || id:ukb-saige-153	KDR	Wald ratio	1	0.0461171	0.0680227	0.497793	-0.0872074	0.179441	1.0472	0.916487	1.19655	0.918642
finn-pQTL-s-R10-seq_3710_49	ukb-saige-153	Colorectal cancer || id:ukb-saige-153	PLG	Wald ratio	1	-0.0408873	0.0698491	0.558302	-0.177791	0.0960169	0.959937	0.837117	1.10078	0.918642
finn-pQTL-s-R10-seq_3814_63	ukb-saige-153	Colorectal cancer || id:ukb-saige-153	IL11RA	Wald ratio	1	0.0369691	0.0635868	0.560974	-0.0876611	0.161599	1.03766	0.916071	1.17539	0.918642
finn-pQTL-s-R10-seq_4129_72	ukb-saige-153	Colorectal cancer || id:ukb-saige-153	CFB	Wald ratio	1	0.0394052	0.0569186	0.488744	-0.0721552	0.150966	1.04019	0.930386	1.16296	0.918642
finn-pQTL-s-R10-seq_4155_3	ukb-saige-153	Colorectal cancer || id:ukb-saige-153	TNC	Wald ratio	1	0.0153597	0.0278394	0.581137	-0.0392055	0.0699248	1.01548	0.961553	1.07243	0.918642
finn-pQTL-s-R10-seq_4159_130	ukb-saige-153	Colorectal cancer || id:ukb-saige-153	CFH	Wald ratio	1	-0.0426431	0.0568574	0.453255	-0.154084	0.0687975	0.958253	0.8572	1.07122	0.918642
finn-pQTL-s-R10-seq_4324_33	ukb-saige-153	Colorectal cancer || id:ukb-saige-153	CST2	Wald ratio	1	0.0292043	0.0447799	0.514289	-0.0585644	0.116973	1.02963	0.943118	1.12409	0.918642
finn-pQTL-s-R10-seq_4811_33	ukb-saige-153	Colorectal cancer || id:ukb-saige-153	ITIH4	Wald ratio	1	0.0442739	0.0624376	0.478268	-0.0781037	0.166652	1.04527	0.924868	1.18134	0.918642
finn-pQTL-s-R10-seq_4867_15	ukb-saige-153	Colorectal cancer || id:ukb-saige-153	VEGFA	Wald ratio	1	-0.0409459	0.0529888	0.439684	-0.144804	0.0629122	0.959881	0.865192	1.06493	0.918642
finn-pQTL-s-R10-seq_4874_3	ukb-saige-153	Colorectal cancer || id:ukb-saige-153	ANG	Wald ratio	1	0.0308867	0.0388943	0.427127	-0.0453462	0.10712	1.03137	0.955667	1.11307	0.918642
finn-pQTL-s-R10-seq_4886_3	ukb-saige-153	Colorectal cancer || id:ukb-saige-153	CCL7	Wald ratio	1	0.0308616	0.0617232	0.617075	-0.0901159	0.151839	1.03134	0.913825	1.16397	0.918642
finn-pQTL-s-R10-seq_4906_35	ukb-saige-153	Colorectal cancer || id:ukb-saige-153	F5	Wald ratio	1	-0.0403596	0.0556308	0.468151	-0.149396	0.0686768	0.960444	0.861228	1.07109	0.918642
finn-pQTL-s-R10-seq_4913_78	ukb-saige-153	Colorectal cancer || id:ukb-saige-153	CCL16	Wald ratio	1	0.01347	0.0262311	0.607592	-0.0379429	0.064883	1.01356	0.962768	1.06703	0.918642
finn-pQTL-s-R10-seq_5036_50	ukb-saige-153	Colorectal cancer || id:ukb-saige-153	TNFAIP6	Wald ratio	1	-0.0424098	0.049106	0.387788	-0.138658	0.0538381	0.958477	0.870526	1.05531	0.918642
finn-pQTL-s-R10-seq_5060_62	ukb-saige-153	Colorectal cancer || id:ukb-saige-153	CD274	Wald ratio	1	-0.0338992	0.0529676	0.522173	-0.137716	0.0699172	0.966669	0.871346	1.07242	0.918642
finn-pQTL-s-R10-seq_5084_154	ukb-saige-153	Colorectal cancer || id:ukb-saige-153	IL17RB	Wald ratio	1	-0.035977	0.0608841	0.554581	-0.15531	0.0833559	0.964662	0.85615	1.08693	0.918642
finn-pQTL-s-R10-seq_5125_6	ukb-saige-153	Colorectal cancer || id:ukb-saige-153	SIGLEC14	Wald ratio	1	-0.0260817	0.0304287	0.391366	-0.085722	0.0335585	0.974255	0.917849	1.03413	0.918642
finn-pQTL-s-R10-seq_5238_26	ukb-saige-153	Colorectal cancer || id:ukb-saige-153	PPIE	Wald ratio	1	0.0387869	0.053332	0.467059	-0.0657439	0.143318	1.03955	0.936371	1.1541	0.918642
finn-pQTL-s-R10-seq_5312_49	ukb-saige-153	Colorectal cancer || id:ukb-saige-153	APOE	Wald ratio	1	-0.0361683	0.0442057	0.413253	-0.122812	0.0504749	0.964478	0.88443	1.05177	0.918642
finn-pQTL-s-R10-seq_5459_33	ukb-saige-153	Colorectal cancer || id:ukb-saige-153	CST1	Wald ratio	1	0.0225072	0.0345111	0.514289	-0.0451345	0.090149	1.02276	0.955869	1.09434	0.918642
finn-pQTL-s-R10-seq_5462_62	ukb-saige-153	Colorectal cancer || id:ukb-saige-153	FCN3	Wald ratio	1	-0.0670753	0.0769393	0.38332	-0.217876	0.0837258	0.935125	0.804225	1.08733	0.918642
finn-pQTL-s-R10-seq_5630_48	ukb-saige-153	Colorectal cancer || id:ukb-saige-153	CD300A	Wald ratio	1	0.0363486	0.0408922	0.374063	-0.0438001	0.116497	1.03702	0.957145	1.12355	0.918642
finn-pQTL-s-R10-seq_5638_23	ukb-saige-153	Colorectal cancer || id:ukb-saige-153	COLGALT1	Wald ratio	1	-0.0499303	0.0748954	0.504985	-0.196725	0.0968647	0.951296	0.821416	1.10171	0.918642
finn-pQTL-s-R10-seq_5675_6	ukb-saige-153	Colorectal cancer || id:ukb-saige-153	TNC	Wald ratio	1	-0.0145105	0.0263003	0.581137	-0.066059	0.037038	0.985594	0.936076	1.03773	0.918642
finn-pQTL-s-R10-seq_5727_35	ukb-saige-153	Colorectal cancer || id:ukb-saige-153	B3GLCT	Wald ratio	1	0.032394	0.0674875	0.631227	-0.0998815	0.164669	1.03292	0.904945	1.179	0.918642
finn-pQTL-s-R10-seq_5803_24	ukb-saige-153	Colorectal cancer || id:ukb-saige-153	C3	Wald ratio	1	0.0515643	0.0705617	0.46492	-0.0867366	0.189865	1.05292	0.916919	1.20909	0.918642
finn-pQTL-s-R10-seq_5852_6	ukb-saige-153	Colorectal cancer || id:ukb-saige-153	S100A12	Wald ratio	1	-0.0547294	0.0729725	0.453255	-0.197755	0.0882967	0.946741	0.82057	1.09231	0.918642
finn-pQTL-s-R10-seq_5992_50	ukb-saige-153	Colorectal cancer || id:ukb-saige-153	CD8A	Wald ratio	1	-0.0326869	0.05576	0.557736	-0.141977	0.0766027	0.967842	0.867642	1.07961	0.918642
finn-pQTL-s-R10-seq_6042_52	ukb-saige-153	Colorectal cancer || id:ukb-saige-153	TNC	Wald ratio	1	-0.0342977	0.0432449	0.427718	-0.119058	0.0504623	0.966284	0.887757	1.05176	0.918642
finn-pQTL-s-R10-seq_6209_2	ukb-saige-153	Colorectal cancer || id:ukb-saige-153	AOC1	Wald ratio	1	-0.0140514	0.029508	0.633939	-0.0718871	0.0437843	0.986047	0.930636	1.04476	0.918642
finn-pQTL-s-R10-seq_6227_1	ukb-saige-153	Colorectal cancer || id:ukb-saige-153	KLK10	Wald ratio	1	-0.0370798	0.0407878	0.363302	-0.117024	0.0428643	0.963599	0.889564	1.0438	0.918642
finn-pQTL-s-R10-seq_6236_51	ukb-saige-153	Colorectal cancer || id:ukb-saige-153	CTHRC1	Wald ratio	1	-0.22815	0.308673	0.459828	-0.83315	0.37685	0.796005	0.434678	1.45769	0.918642
finn-pQTL-s-R10-seq_6382_17	ukb-saige-153	Colorectal cancer || id:ukb-saige-153	MANBA	Wald ratio	1	-0.024242	0.0398262	0.542726	-0.102301	0.0538173	0.976049	0.902757	1.05529	0.918642
finn-pQTL-s-R10-seq_6431_68	ukb-saige-153	Colorectal cancer || id:ukb-saige-153	PCYOX1	Wald ratio	1	-0.0169885	0.0283142	0.548506	-0.0724843	0.0385073	0.983155	0.93008	1.03926	0.918642
finn-pQTL-s-R10-seq_6451_64	ukb-saige-153	Colorectal cancer || id:ukb-saige-153	ASPN	Wald ratio	1	-0.0293242	0.0518813	0.571926	-0.131011	0.0723631	0.971102	0.877208	1.07505	0.918642
finn-pQTL-s-R10-seq_6485_59	ukb-saige-153	Colorectal cancer || id:ukb-saige-153	IGLL1	Wald ratio	1	-0.0482976	0.0880721	0.583426	-0.220919	0.124324	0.95285	0.801782	1.13238	0.918642
finn-pQTL-s-R10-seq_6550_4	ukb-saige-153	Colorectal cancer || id:ukb-saige-153	ICAM4	Wald ratio	1	0.0521534	0.0894059	0.559669	-0.123082	0.227389	1.05354	0.884191	1.25532	0.918642
finn-pQTL-s-R10-seq_6556_5	ukb-saige-153	Colorectal cancer || id:ukb-saige-153	ENPP5	Wald ratio	1	0.0167787	0.031544	0.594785	-0.0450476	0.0786051	1.01692	0.955952	1.08178	0.918642
finn-pQTL-s-R10-seq_6557_50	ukb-saige-153	Colorectal cancer || id:ukb-saige-153	LRRC15	Wald ratio	1	-0.056638	0.0641897	0.377586	-0.18245	0.0691738	0.944936	0.833226	1.07162	0.918642
finn-pQTL-s-R10-seq_6576_1	ukb-saige-153	Colorectal cancer || id:ukb-saige-153	ART4	Wald ratio	1	-0.0105885	0.0211771	0.617075	-0.0520956	0.0309185	0.989467	0.949238	1.0314	0.918642
finn-pQTL-s-R10-seq_7096_30	ukb-saige-153	Colorectal cancer || id:ukb-saige-153	RMDN1	Wald ratio	1	0.0427489	0.0801541	0.593803	-0.114353	0.199851	1.04368	0.891943	1.22122	0.918642
finn-pQTL-s-R10-seq_7131_207	ukb-saige-153	Colorectal cancer || id:ukb-saige-153	TNC	Wald ratio	1	-0.0175752	0.031855	0.581137	-0.0800109	0.0448606	0.982578	0.923106	1.04588	0.918642
finn-pQTL-s-R10-seq_7156_2	ukb-saige-153	Colorectal cancer || id:ukb-saige-153	FUT10	Wald ratio	1	-0.0213358	0.0335277	0.524539	-0.0870501	0.0443785	0.97889	0.916631	1.04538	0.918642
finn-pQTL-s-R10-seq_7218_87	ukb-saige-153	Colorectal cancer || id:ukb-saige-153	ATP1B2	Wald ratio	1	0.0336276	0.0528433	0.524539	-0.0699454	0.137201	1.0342	0.932445	1.14706	0.918642
finn-pQTL-s-R10-seq_7244_16	ukb-saige-153	Colorectal cancer || id:ukb-saige-153	IGFLR1	Wald ratio	1	-0.0327074	0.0490611	0.504985	-0.128867	0.0634524	0.967822	0.879091	1.06551	0.918642
finn-pQTL-s-R10-seq_7775_15	ukb-saige-153	Colorectal cancer || id:ukb-saige-153	KLK11	Wald ratio	1	-0.0334124	0.0434361	0.441756	-0.118547	0.0517224	0.96714	0.88821	1.05308	0.918642
finn-pQTL-s-R10-seq_7779_86	ukb-saige-153	Colorectal cancer || id:ukb-saige-153	CHST11	Wald ratio	1	0.0293172	0.0561913	0.601852	-0.0808178	0.139452	1.02975	0.922362	1.14964	0.918642
finn-pQTL-s-R10-seq_7856_51	ukb-saige-153	Colorectal cancer || id:ukb-saige-153	FAM151A	Wald ratio	1	0.0672273	0.074838	0.369023	-0.0794551	0.21391	1.06954	0.92362	1.23851	0.918642
finn-pQTL-s-R10-seq_7866_11	ukb-saige-153	Colorectal cancer || id:ukb-saige-153	DNAJC30	Wald ratio	1	-0.0404632	0.0590545	0.493227	-0.15621	0.0752835	0.960344	0.85538	1.07819	0.918642
finn-pQTL-s-R10-seq_7891_45	ukb-saige-153	Colorectal cancer || id:ukb-saige-153	UGT1A6	Wald ratio	1	-0.0275579	0.057621	0.632465	-0.140495	0.0853793	0.972818	0.868928	1.08913	0.918642
finn-pQTL-s-R10-seq_7928_183	ukb-saige-153	Colorectal cancer || id:ukb-saige-153	TPST1	Wald ratio	1	-0.0467443	0.0779072	0.548506	-0.199442	0.105954	0.954331	0.819187	1.11177	0.918642
finn-pQTL-s-R10-seq_7955_195	ukb-saige-153	Colorectal cancer || id:ukb-saige-153	ITIH1	Wald ratio	1	-0.0156252	0.0312504	0.617075	-0.0768761	0.0456256	0.984496	0.926005	1.04668	0.918642
finn-pQTL-s-R10-seq_7968_15	ukb-saige-153	Colorectal cancer || id:ukb-saige-153	CRTAM	Wald ratio	1	0.0336844	0.0617547	0.585441	-0.0873549	0.154724	1.03426	0.916352	1.16734	0.918642
finn-pQTL-s-R10-seq_8039_41	ukb-saige-153	Colorectal cancer || id:ukb-saige-153	FAM177A1	Wald ratio	1	-0.0232214	0.0366654	0.526516	-0.0950856	0.0486428	0.977046	0.909295	1.04985	0.918642
finn-pQTL-s-R10-seq_8099_42	ukb-saige-153	Colorectal cancer || id:ukb-saige-153	SPON2	Wald ratio	1	-0.0261067	0.0461888	0.571926	-0.116637	0.0644234	0.974231	0.889908	1.06654	0.918642
finn-pQTL-s-R10-seq_8225_86	ukb-saige-153	Colorectal cancer || id:ukb-saige-153	EPHB2	Wald ratio	1	-0.0378335	0.0720639	0.599583	-0.179079	0.103412	0.962873	0.83604	1.10895	0.918642
finn-pQTL-s-R10-seq_8239_223	ukb-saige-153	Colorectal cancer || id:ukb-saige-153	BCHE	Wald ratio	1	0.0500551	0.0617701	0.417742	-0.0710143	0.171124	1.05133	0.931449	1.18664	0.918642
finn-pQTL-s-R10-seq_8244_16	ukb-saige-153	Colorectal cancer || id:ukb-saige-153	FUT8	Wald ratio	1	-0.0313407	0.040743	0.441756	-0.111197	0.0485155	0.969145	0.894763	1.04971	0.918642
finn-pQTL-s-R10-seq_8248_222	ukb-saige-153	Colorectal cancer || id:ukb-saige-153	SIGLEC14	Wald ratio	1	-0.0269266	0.0314144	0.391366	-0.0884988	0.0346456	0.973433	0.915304	1.03525	0.918642
finn-pQTL-s-R10-seq_8336_267	ukb-saige-153	Colorectal cancer || id:ukb-saige-153	GRAMD1C	Wald ratio	1	0.0527256	0.0710649	0.458126	-0.0865616	0.192013	1.05414	0.917079	1.21169	0.918642
finn-pQTL-s-R10-seq_8345_27	ukb-saige-153	Colorectal cancer || id:ukb-saige-153	GPX7	Wald ratio	1	0.0416872	0.0648468	0.520317	-0.0854125	0.168787	1.04257	0.918133	1.18387	0.918642
finn-pQTL-s-R10-seq_8346_9	ukb-saige-153	Colorectal cancer || id:ukb-saige-153	DPP7	Wald ratio	1	0.0469331	0.0536379	0.381574	-0.0581971	0.152063	1.04805	0.943464	1.16423	0.918642
finn-pQTL-s-R10-seq_8348_4	ukb-saige-153	Colorectal cancer || id:ukb-saige-153	EPHB2	Wald ratio	1	-0.0394515	0.0751457	0.599583	-0.186737	0.107834	0.961317	0.829662	1.11386	0.918642
finn-pQTL-s-R10-seq_8356_88	ukb-saige-153	Colorectal cancer || id:ukb-saige-153	OXT	Wald ratio	1	-0.0284968	0.0474947	0.548506	-0.121586	0.0645927	0.971905	0.885515	1.06672	0.918642
finn-pQTL-s-R10-seq_8402_22	ukb-saige-153	Colorectal cancer || id:ukb-saige-153	CYTL1	Wald ratio	1	0.0403064	0.0705362	0.567709	-0.0979445	0.178557	1.04113	0.906699	1.19549	0.918642
finn-pQTL-s-R10-seq_8407_84	ukb-saige-153	Colorectal cancer || id:ukb-saige-153	NOTCH2	Wald ratio	1	-0.0406689	0.0535117	0.447255	-0.145552	0.064214	0.960147	0.864545	1.06632	0.918642
finn-pQTL-s-R10-seq_8428_102	ukb-saige-153	Colorectal cancer || id:ukb-saige-153	NTM	Wald ratio	1	0.048753	0.0639883	0.446117	-0.0766641	0.17417	1.04996	0.926201	1.19026	0.918642
finn-pQTL-s-R10-seq_8606_39	ukb-saige-153	Colorectal cancer || id:ukb-saige-153	GPNMB	Wald ratio	1	-0.0412932	0.0857629	0.630174	-0.209388	0.126802	0.959548	0.81108	1.13519	0.918642
finn-pQTL-s-R10-seq_8697_38	ukb-saige-153	Colorectal cancer || id:ukb-saige-153	GPC1	Wald ratio	1	0.033981	0.0398398	0.393692	-0.0441049	0.112067	1.03456	0.956854	1.11859	0.918642
finn-pQTL-s-R10-seq_8841_65	ukb-saige-153	Colorectal cancer || id:ukb-saige-153	CILP2	Wald ratio	1	-0.0837745	0.117284	0.475051	-0.313652	0.146103	0.919639	0.730773	1.15732	0.918642
finn-pQTL-s-R10-seq_8874_53	ukb-saige-153	Colorectal cancer || id:ukb-saige-153	CLN5	Wald ratio	1	-0.0634563	0.0761475	0.404657	-0.212705	0.0857929	0.938515	0.808394	1.08958	0.918642
finn-pQTL-s-R10-seq_8932_1	ukb-saige-153	Colorectal cancer || id:ukb-saige-153	ENTPD6	Wald ratio	1	-0.0308181	0.0462271	0.504985	-0.121423	0.059787	0.969652	0.885659	1.06161	0.918642
finn-pQTL-s-R10-seq_8969_49	ukb-saige-153	Colorectal cancer || id:ukb-saige-153	CD14	Wald ratio	1	-0.0356507	0.0742724	0.631227	-0.181225	0.109923	0.964977	0.834248	1.11619	0.918642
finn-pQTL-s-R10-seq_8973_23	ukb-saige-153	Colorectal cancer || id:ukb-saige-153	FCRL4	Wald ratio	1	0.0174112	0.0290186	0.548506	-0.0394653	0.0742876	1.01756	0.961303	1.07712	0.918642
finn-pQTL-s-R10-seq_9172_69	ukb-saige-153	Colorectal cancer || id:ukb-saige-153	MMP8	Wald ratio	1	0.0374413	0.0652823	0.566286	-0.090512	0.165395	1.03815	0.913463	1.17986	0.918642
finn-pQTL-s-R10-seq_9173_21	ukb-saige-153	Colorectal cancer || id:ukb-saige-153	PGM1	Wald ratio	1	-0.0681043	0.0953461	0.475051	-0.254983	0.118774	0.934163	0.77493	1.12612	0.918642
finn-pQTL-s-R10-seq_9183_7	ukb-saige-153	Colorectal cancer || id:ukb-saige-153	IFNAR1	Wald ratio	1	0.0177233	0.0315082	0.573775	-0.0440326	0.0794793	1.01788	0.956923	1.08272	0.918642
finn-pQTL-s-R10-seq_9231_23	ukb-saige-153	Colorectal cancer || id:ukb-saige-153	BPNT2	Wald ratio	1	0.0428571	0.0535714	0.423711	-0.0621428	0.147857	1.04379	0.939749	1.15935	0.918642
finn-pQTL-s-R10-seq_9251_28	ukb-saige-153	Colorectal cancer || id:ukb-saige-153	MAN2B2	Wald ratio	1	-0.0269817	0.0517149	0.601852	-0.128343	0.0743795	0.973379	0.879552	1.07722	0.918642
finn-pQTL-s-R10-seq_9269_7	ukb-saige-153	Colorectal cancer || id:ukb-saige-153	BTD	Wald ratio	1	-0.0290298	0.031862	0.362237	-0.0914794	0.0334197	0.971387	0.91258	1.03398	0.918642
finn-pQTL-s-R10-seq_9275_2	ukb-saige-153	Colorectal cancer || id:ukb-saige-153	SIGLEC5	Wald ratio	1	-0.0261698	0.0305314	0.391366	-0.0860114	0.0336718	0.97417	0.917584	1.03425	0.918642
finn-pQTL-s-R10-seq_9282_12	ukb-saige-153	Colorectal cancer || id:ukb-saige-153	CRISP2	Wald ratio	1	0.0239809	0.0335732	0.475051	-0.0418226	0.0897843	1.02427	0.95904	1.09394	0.918642
finn-pQTL-s-R10-seq_9303_9	ukb-saige-153	Colorectal cancer || id:ukb-saige-153	ICOSLG	Wald ratio	1	0.0374986	0.0515605	0.467059	-0.0635601	0.138557	1.03821	0.938418	1.14862	0.918642
finn-pQTL-s-R10-seq_9316_67	ukb-saige-153	Colorectal cancer || id:ukb-saige-153	WFDC1	Wald ratio	1	0.0368858	0.0449044	0.411402	-0.0511269	0.124898	1.03757	0.950158	1.13303	0.918642
finn-pQTL-s-R10-seq_9335_28	ukb-saige-153	Colorectal cancer || id:ukb-saige-153	PSG9	Wald ratio	1	0.0841452	0.0921049	0.360937	-0.0963804	0.264671	1.08779	0.908119	1.303	0.918642
finn-pQTL-s-R10-seq_9385_4	ukb-saige-153	Colorectal cancer || id:ukb-saige-153	GAA	Wald ratio	1	0.0303919	0.0514324	0.554581	-0.0704156	0.131199	1.03086	0.932006	1.1402	0.918642
finn-pQTL-s-R10-seq_9449_150	ukb-saige-153	Colorectal cancer || id:ukb-saige-153	C4BPA	Wald ratio	1	-0.0284734	0.0408532	0.485822	-0.108546	0.0515988	0.971928	0.897138	1.05295	0.918642
finn-pQTL-s-R10-seq_9461_2	ukb-saige-153	Colorectal cancer || id:ukb-saige-153	ICAM4	Wald ratio	1	0.050761	0.0870188	0.559669	-0.119796	0.221318	1.05207	0.887101	1.24772	0.918642
finn-pQTL-s-R10-seq_9595_11	ukb-saige-153	Colorectal cancer || id:ukb-saige-153	B4GALT2	Wald ratio	1	-0.0503581	0.0575522	0.381574	-0.16316	0.0624441	0.950889	0.849455	1.06443	0.918642
finn-pQTL-s-R10-seq_9867_23	ukb-saige-153	Colorectal cancer || id:ukb-saige-153	FBP2	Wald ratio	1	0.0425776	0.0580603	0.463355	-0.0712207	0.156376	1.0435	0.931256	1.16927	0.918642
finn-pQTL-s-R10-seq_9986_14	ukb-saige-153	Colorectal cancer || id:ukb-saige-153	NPW	Wald ratio	1	0.03806	0.0582094	0.513211	-0.0760305	0.152151	1.03879	0.926788	1.16434	0.918642
finn-pQTL-s-R10-seq_10666_7	ukb-saige-153	Colorectal cancer || id:ukb-saige-153	GNPTG	Wald ratio	1	0.0168674	0.0359838	0.639248	-0.0536609	0.0873958	1.01701	0.947753	1.09133	0.920576
finn-pQTL-s-R10-seq_13692_154	ukb-saige-153	Colorectal cancer || id:ukb-saige-153	CCN4	Wald ratio	1	0.0245229	0.0520183	0.637335	-0.077433	0.126479	1.02483	0.925489	1.13483	0.920576
finn-pQTL-s-R10-seq_17819_30	ukb-saige-153	Colorectal cancer || id:ukb-saige-153	FAHD1	Wald ratio	1	0.0330408	0.0708018	0.640738	-0.105731	0.171812	1.03359	0.899667	1.18746	0.920576
finn-pQTL-s-R10-seq_18220_141	ukb-saige-153	Colorectal cancer || id:ukb-saige-153	SRA1	Wald ratio	1	-0.0304324	0.0658846	0.64415	-0.159566	0.0987014	0.970026	0.852513	1.10374	0.920576
finn-pQTL-s-R10-seq_25072_11	ukb-saige-153	Colorectal cancer || id:ukb-saige-153	CHD1L	Wald ratio	1	-0.0222388	0.047989	0.643067	-0.116297	0.0718197	0.978007	0.890211	1.07446	0.920576
finn-pQTL-s-R10-seq_9076_25	ukb-saige-153	Colorectal cancer || id:ukb-saige-153	PENK	Wald ratio	1	0.0201405	0.0431583	0.640738	-0.0644497	0.104731	1.02034	0.937583	1.11041	0.920576
finn-pQTL-s-R10-seq_9837_60	ukb-saige-153	Colorectal cancer || id:ukb-saige-153	NQO1	Wald ratio	1	0.0187948	0.0404811	0.642443	-0.0605482	0.0981379	1.01897	0.941248	1.10311	0.920576
finn-pQTL-s-R10-seq_12333_87	ukb-saige-153	Colorectal cancer || id:ukb-saige-153	RPIA	Wald ratio	1	0.0344084	0.0756984	0.649436	-0.113961	0.182777	1.03501	0.892293	1.20055	0.92088
finn-pQTL-s-R10-seq_3322_52	ukb-saige-153	Colorectal cancer || id:ukb-saige-153	LRIG3	Wald ratio	1	-0.0273593	0.059693	0.646713	-0.144358	0.089639	0.973012	0.865578	1.09378	0.92088
finn-pQTL-s-R10-seq_6520_87	ukb-saige-153	Colorectal cancer || id:ukb-saige-153	MGP	Wald ratio	1	0.021912	0.0482064	0.649436	-0.0725725	0.116397	1.02215	0.929998	1.12344	0.92088
finn-pQTL-s-R10-seq_9557_5	ukb-saige-153	Colorectal cancer || id:ukb-saige-153	MANSC1	Wald ratio	1	-0.0315298	0.0693655	0.649436	-0.167486	0.104427	0.968962	0.845788	1.11007	0.92088
finn-pQTL-s-R10-seq_10565_19	ukb-saige-153	Colorectal cancer || id:ukb-saige-153	SLITRK3	Wald ratio	1	0.0309357	0.0707103	0.661749	-0.107656	0.169528	1.03142	0.897936	1.18475	0.927309
finn-pQTL-s-R10-seq_12812_25	ukb-saige-153	Colorectal cancer || id:ukb-saige-153	ACYP2	Wald ratio	1	-0.0330394	0.0754161	0.661317	-0.180855	0.114776	0.9675	0.834556	1.12162	0.927309
finn-pQTL-s-R10-seq_13666_222	ukb-saige-153	Colorectal cancer || id:ukb-saige-153	CA10	Wald ratio	1	-0.0444004	0.100312	0.658038	-0.241012	0.152211	0.956571	0.785832	1.16441	0.927309
finn-pQTL-s-R10-seq_14078_69	ukb-saige-153	Colorectal cancer || id:ukb-saige-153	XCL1	Wald ratio	1	0.0309931	0.0697345	0.656721	-0.105686	0.167673	1.03148	0.899707	1.18255	0.927309
finn-pQTL-s-R10-seq_14684_17	ukb-saige-153	Colorectal cancer || id:ukb-saige-153	CAPN2	Wald ratio	1	-0.0428487	0.097016	0.65873	-0.233	0.147303	0.958056	0.792154	1.1587	0.927309
finn-pQTL-s-R10-seq_23619_235	ukb-saige-153	Colorectal cancer || id:ukb-saige-153	C19orf53	Wald ratio	1	0.032487	0.0738341	0.659937	-0.112228	0.177202	1.03302	0.893841	1.19387	0.927309
finn-pQTL-s-R10-seq_3074_6	ukb-saige-153	Colorectal cancer || id:ukb-saige-153	LBP	Wald ratio	1	-0.0138646	0.0318071	0.662911	-0.0762066	0.0484773	0.986231	0.926625	1.04967	0.927309
finn-pQTL-s-R10-seq_11178_21	ukb-saige-153	Colorectal cancer || id:ukb-saige-153	SVEP1	Inverse variance weighted	2	0.01732	0.0470149	0.712579	-0.0748292	0.109469	1.01747	0.927902	1.11569	0.927315
finn-pQTL-s-R10-seq_15615_8	ukb-saige-153	Colorectal cancer || id:ukb-saige-153	LILRB3	Inverse variance weighted	3	0.010223	0.0282786	0.717717	-0.0452029	0.065649	1.01028	0.955803	1.06785	0.927315
finn-pQTL-s-R10-seq_16561_9	ukb-saige-153	Colorectal cancer || id:ukb-saige-153	A1BG	Inverse variance weighted	2	0.0145465	0.0374497	0.6977	-0.0588549	0.0879478	1.01465	0.942844	1.09193	0.927315
finn-pQTL-s-R10-seq_16792_4	ukb-saige-153	Colorectal cancer || id:ukb-saige-153	SIGLEC5	Inverse variance weighted	2	-0.011945	0.0257659	0.642935	-0.0624461	0.038556	0.988126	0.939464	1.03931	0.927315
finn-pQTL-s-R10-seq_23588_9	ukb-saige-153	Colorectal cancer || id:ukb-saige-153	HSDL2	Inverse variance weighted	2	0.0265377	0.0632067	0.674591	-0.0973474	0.150423	1.02689	0.907241	1.16233	0.927315
finn-pQTL-s-R10-seq_2700_56	ukb-saige-153	Colorectal cancer || id:ukb-saige-153	PROS1	Inverse variance weighted	2	0.0207019	0.0525467	0.693603	-0.0822896	0.123693	1.02092	0.921005	1.13167	0.927315
finn-pQTL-s-R10-seq_5742_14	ukb-saige-153	Colorectal cancer || id:ukb-saige-153	ACP6	Inverse variance weighted	2	-0.0119535	0.0295913	0.686246	-0.0699525	0.0460454	0.988118	0.932438	1.04712	0.927315
finn-pQTL-s-R10-seq_5982_50	ukb-saige-153	Colorectal cancer || id:ukb-saige-153	CFHR1	Inverse variance weighted	2	-0.0110182	0.0294706	0.7085	-0.0687806	0.0467441	0.989042	0.933531	1.04785	0.927315
finn-pQTL-s-R10-seq_6247_9	ukb-saige-153	Colorectal cancer || id:ukb-saige-153	SIRPB1	Inverse variance weighted	3	-0.0113775	0.0272448	0.676237	-0.0647774	0.0420223	0.988687	0.937276	1.04292	0.927315
finn-pQTL-s-R10-seq_6947_4	ukb-saige-153	Colorectal cancer || id:ukb-saige-153	ST3GAL6	Inverse variance weighted	2	-0.0151624	0.0349179	0.664121	-0.0836014	0.0532766	0.984952	0.919798	1.05472	0.927315
finn-pQTL-s-R10-seq_8097_77	ukb-saige-153	Colorectal cancer || id:ukb-saige-153	LIPN	Inverse variance weighted	2	0.0192389	0.0519489	0.711127	-0.0825809	0.121059	1.01943	0.920737	1.12869	0.927315
finn-pQTL-s-R10-seq_9313_27	ukb-saige-153	Colorectal cancer || id:ukb-saige-153	CBLN1	Inverse variance weighted	2	0.0175106	0.0403938	0.664654	-0.0616612	0.0966823	1.01766	0.940201	1.10151	0.927315
finn-pQTL-s-R10-seq_9409_11	ukb-saige-153	Colorectal cancer || id:ukb-saige-153	TPSAB1	Inverse variance weighted	3	0.0143505	0.0343095	0.675752	-0.0528961	0.0815972	1.01445	0.948479	1.08502	0.927315
finn-pQTL-s-R10-seq_10966_1	ukb-saige-153	Colorectal cancer || id:ukb-saige-153	AHSG	Wald ratio	1	0.00842637	0.02015	0.675814	-0.0310677	0.0479204	1.00846	0.96941	1.04909	0.932053
finn-pQTL-s-R10-seq_11390_24	ukb-saige-153	Colorectal cancer || id:ukb-saige-153	CA8	Wald ratio	1	0.0201527	0.0487207	0.67914	-0.07534	0.115645	1.02036	0.927428	1.1226	0.932053
finn-pQTL-s-R10-seq_12411_60	ukb-saige-153	Colorectal cancer || id:ukb-saige-153	MAX	Wald ratio	1	0.0321526	0.0752507	0.669181	-0.115339	0.179644	1.03268	0.891064	1.19679	0.932053
finn-pQTL-s-R10-seq_15635_4	ukb-saige-153	Colorectal cancer || id:ukb-saige-153	SMOC2	Wald ratio	1	-0.0182609	0.0431978	0.672494	-0.102929	0.0664068	0.981905	0.902191	1.06866	0.932053
finn-pQTL-s-R10-seq_20563_48	ukb-saige-153	Colorectal cancer || id:ukb-saige-153	TLR10	Wald ratio	1	0.0296753	0.0710088	0.676013	-0.109502	0.168853	1.03012	0.89628	1.18395	0.932053
finn-pQTL-s-R10-seq_21147_9	ukb-saige-153	Colorectal cancer || id:ukb-saige-153	FN3K	Wald ratio	1	-0.0127228	0.0301675	0.673215	-0.0718512	0.0464055	0.987358	0.930669	1.0475	0.932053
finn-pQTL-s-R10-seq_23569_53	ukb-saige-153	Colorectal cancer || id:ukb-saige-153	STARD10	Wald ratio	1	-0.0291266	0.0696505	0.675814	-0.165641	0.107388	0.971294	0.84735	1.11337	0.932053
finn-pQTL-s-R10-seq_3339_33	ukb-saige-153	Colorectal cancer || id:ukb-saige-153	THBS2	Wald ratio	1	-0.0171221	0.041093	0.676922	-0.0976643	0.0634202	0.983024	0.906953	1.06547	0.932053
finn-pQTL-s-R10-seq_3640_14	ukb-saige-153	Colorectal cancer || id:ukb-saige-153	LRPAP1	Wald ratio	1	0.0232479	0.0561825	0.679026	-0.0868698	0.133366	1.02352	0.916796	1.14267	0.932053
finn-pQTL-s-R10-seq_9321_400	ukb-saige-153	Colorectal cancer || id:ukb-saige-153	NMB	Wald ratio	1	-0.0301615	0.0723877	0.676922	-0.172041	0.111718	0.970289	0.841944	1.1182	0.932053
finn-pQTL-s-R10-seq_8759_29	ukb-saige-153	Colorectal cancer || id:ukb-saige-153	A4GALT	Wald ratio	1	-0.0297031	0.0725308	0.682155	-0.171864	0.112457	0.970734	0.842094	1.11902	0.934424
finn-pQTL-s-R10-seq_23923_26	ukb-saige-153	Colorectal cancer || id:ukb-saige-153	PPM1F	Wald ratio	1	-0.0261736	0.0648109	0.686326	-0.153203	0.100856	0.974166	0.857956	1.10612	0.938366
finn-pQTL-s-R10-seq_5634_39	ukb-saige-153	Colorectal cancer || id:ukb-saige-153	POFUT1	Wald ratio	1	0.0271076	0.067769	0.689157	-0.10572	0.159935	1.02748	0.899677	1.17343	0.938701
finn-pQTL-s-R10-seq_6077_63	ukb-saige-153	Colorectal cancer || id:ukb-saige-153	ADA2	Wald ratio	1	-0.0104129	0.0260324	0.689157	-0.0614364	0.0406105	0.989641	0.940413	1.04145	0.938701
finn-pQTL-s-R10-seq_13388_57	ukb-saige-153	Colorectal cancer || id:ukb-saige-153	PCSK1	Wald ratio	1	0.00877955	0.0231548	0.704564	-0.036604	0.054163	1.00882	0.964058	1.05566	0.940282
finn-pQTL-s-R10-seq_15559_5	ukb-saige-153	Colorectal cancer || id:ukb-saige-153	ANTXR2	Wald ratio	1	0.0323208	0.0841688	0.700978	-0.13265	0.197292	1.03285	0.875771	1.2181	0.940282
finn-pQTL-s-R10-seq_19631_13	ukb-saige-153	Colorectal cancer || id:ukb-saige-153	KNG1	Wald ratio	1	0.0293944	0.0751949	0.695864	-0.117988	0.176776	1.02983	0.888707	1.19336	0.940282
finn-pQTL-s-R10-seq_21237_24	ukb-saige-153	Colorectal cancer || id:ukb-saige-153	PADI4	Wald ratio	1	-0.0204851	0.0524037	0.695864	-0.123196	0.0822261	0.979723	0.88409	1.0857	0.940282
finn-pQTL-s-R10-seq_21548_20	ukb-saige-153	Colorectal cancer || id:ukb-saige-153	GGT5	Wald ratio	1	0.0196334	0.0517608	0.704457	-0.0818177	0.121084	1.01983	0.92144	1.12872	0.940282
finn-pQTL-s-R10-seq_4984_83	ukb-saige-153	Colorectal cancer || id:ukb-saige-153	ESD	Wald ratio	1	0.0198455	0.0509367	0.696825	-0.0799905	0.119681	1.02004	0.923125	1.12714	0.940282
finn-pQTL-s-R10-seq_5581_28	ukb-saige-153	Colorectal cancer || id:ukb-saige-153	FGL1	Wald ratio	1	0.0151278	0.0391543	0.699227	-0.0616147	0.0918703	1.01524	0.940245	1.09622	0.940282
finn-pQTL-s-R10-seq_5680_54	ukb-saige-153	Colorectal cancer || id:ukb-saige-153	OBP2B	Wald ratio	1	0.0245152	0.0646309	0.704457	-0.102161	0.151192	1.02482	0.902884	1.16322	0.940282
finn-pQTL-s-R10-seq_8274_64	ukb-saige-153	Colorectal cancer || id:ukb-saige-153	STX7	Wald ratio	1	0.0295978	0.077518	0.702596	-0.122338	0.181533	1.03004	0.88485	1.19905	0.940282
finn-pQTL-s-R10-seq_8458_16	ukb-saige-153	Colorectal cancer || id:ukb-saige-153	SNCA	Wald ratio	1	0.0287263	0.0754067	0.703239	-0.119071	0.176523	1.02914	0.887745	1.19306	0.940282
finn-pQTL-s-R10-seq_9002_36	ukb-saige-153	Colorectal cancer || id:ukb-saige-153	SERPINA11	Wald ratio	1	-0.0524008	0.13266	0.692843	-0.312415	0.207613	0.948948	0.731678	1.23074	0.940282
finn-pQTL-s-R10-seq_9267_2	ukb-saige-153	Colorectal cancer || id:ukb-saige-153	CPA4	Wald ratio	1	-0.00761105	0.0201739	0.705971	-0.0471518	0.0319297	0.992418	0.953943	1.03244	0.940431
finn-pQTL-s-R10-seq_6984_6	ukb-saige-153	Colorectal cancer || id:ukb-saige-153	IGSF8	Wald ratio	1	-0.0313944	0.08415	0.709091	-0.196328	0.13354	0.969093	0.821742	1.14287	0.942858
finn-pQTL-s-R10-seq_11836_144	ukb-saige-153	Colorectal cancer || id:ukb-saige-153	DDR1	Inverse variance weighted	2	-0.0294823	0.0936475	0.752897	-0.213031	0.154067	0.970948	0.808131	1.16657	0.946448
finn-pQTL-s-R10-seq_15584_9	ukb-saige-153	Colorectal cancer || id:ukb-saige-153	CFHR2	Inverse variance weighted	3	0.00813718	0.0255677	0.750288	-0.0419755	0.0582499	1.00817	0.958893	1.05998	0.946448
finn-pQTL-s-R10-seq_3175_51	ukb-saige-153	Colorectal cancer || id:ukb-saige-153	ADAMTS13	Inverse variance weighted	2	0.00970832	0.0325949	0.76582	-0.0541777	0.0735944	1.00976	0.947264	1.07637	0.946448
finn-pQTL-s-R10-seq_4964_67	ukb-saige-153	Colorectal cancer || id:ukb-saige-153	ERAP1	Inverse variance weighted	2	0.00706596	0.0231113	0.759805	-0.0382321	0.0523641	1.00709	0.962489	1.05376	0.946448
finn-pQTL-s-R10-seq_5810_25	ukb-saige-153	Colorectal cancer || id:ukb-saige-153	TDGF1	Inverse variance weighted	2	0.00680002	0.0220251	0.75752	-0.0363693	0.0499693	1.00682	0.964284	1.05124	0.946448
finn-pQTL-s-R10-seq_6234_74	ukb-saige-153	Colorectal cancer || id:ukb-saige-153	VIT	Inverse variance weighted	2	-0.0293797	0.101129	0.77142	-0.227592	0.168832	0.971048	0.796449	1.18392	0.946448
finn-pQTL-s-R10-seq_11150_3	ukb-saige-153	Colorectal cancer || id:ukb-saige-153	COL6A1	Wald ratio	1	0.0180106	0.0495292	0.71613	-0.0790667	0.115088	1.01817	0.923978	1.12197	0.947013
finn-pQTL-s-R10-seq_12714_38	ukb-saige-153	Colorectal cancer || id:ukb-saige-153	AP1G2	Wald ratio	1	-0.184699	0.506211	0.715212	-1.17687	0.807476	0.831355	0.308241	2.24224	0.947013
finn-pQTL-s-R10-seq_5066_134	ukb-saige-153	Colorectal cancer || id:ukb-saige-153	CD300C	Wald ratio	1	-0.0260168	0.070955	0.713868	-0.165089	0.113055	0.974319	0.847819	1.11969	0.947013
finn-pQTL-s-R10-seq_12486_8	ukb-saige-153	Colorectal cancer || id:ukb-saige-153	GLRX2	Wald ratio	1	0.0223212	0.0620035	0.718847	-0.0992055	0.143848	1.02257	0.905557	1.15471	0.94708
finn-pQTL-s-R10-seq_15556_49	ukb-saige-153	Colorectal cancer || id:ukb-saige-153	AMY2B	Wald ratio	1	-0.0188778	0.0524384	0.718847	-0.121657	0.0839014	0.981299	0.885452	1.08752	0.94708
finn-pQTL-s-R10-seq_4831_4	ukb-saige-153	Colorectal cancer || id:ukb-saige-153	SELL	Wald ratio	1	-0.0178069	0.0496937	0.720094	-0.115206	0.0795927	0.982351	0.891182	1.08285	0.94708
finn-pQTL-s-R10-seq_13730_18	ukb-saige-153	Colorectal cancer || id:ukb-saige-153	CTSC	Wald ratio	1	0.0131368	0.0373893	0.725325	-0.0601462	0.0864197	1.01322	0.941627	1.09026	0.950516
finn-pQTL-s-R10-seq_17783_9	ukb-saige-153	Colorectal cancer || id:ukb-saige-153	MMAB	Wald ratio	1	-0.0217702	0.0618731	0.724949	-0.143041	0.0995011	0.978465	0.866718	1.10462	0.950516
finn-pQTL-s-R10-seq_3172_28	ukb-saige-153	Colorectal cancer || id:ukb-saige-153	ARSB	Wald ratio	1	-0.0234984	0.067598	0.728126	-0.15599	0.108994	0.976776	0.855567	1.11516	0.951168
finn-pQTL-s-R10-seq_5496_49	ukb-saige-153	Colorectal cancer || id:ukb-saige-153	SPON1	Wald ratio	1	0.0241488	0.0699043	0.729753	-0.112864	0.161161	1.02444	0.893272	1.17487	0.951168
finn-pQTL-s-R10-seq_6507_16	ukb-saige-153	Colorectal cancer || id:ukb-saige-153	NCAM2	Wald ratio	1	-0.0164329	0.0475168	0.729468	-0.109566	0.0767	0.983701	0.896223	1.07972	0.951168
finn-pQTL-s-R10-seq_19617_5	ukb-saige-153	Colorectal cancer || id:ukb-saige-153	PTGR1	Inverse variance weighted	2	0.0126957	0.0459964	0.782536	-0.0774573	0.102849	1.01278	0.925467	1.10832	0.952086
finn-pQTL-s-R10-seq_12386_11	ukb-saige-153	Colorectal cancer || id:ukb-saige-153	RNPEP	Wald ratio	1	-0.0158026	0.0478237	0.741071	-0.109537	0.0779319	0.984322	0.896249	1.08105	0.952368
finn-pQTL-s-R10-seq_14708_59	ukb-saige-153	Colorectal cancer || id:ukb-saige-153	C8G	Wald ratio	1	-0.0142291	0.0426873	0.738883	-0.0978961	0.069438	0.985872	0.906743	1.07191	0.952368
finn-pQTL-s-R10-seq_20064_24	ukb-saige-153	Colorectal cancer || id:ukb-saige-153	FN1	Wald ratio	1	0.0144997	0.0429621	0.73574	-0.069706	0.0987054	1.01461	0.932668	1.10374	0.952368
finn-pQTL-s-R10-seq_23371_5	ukb-saige-153	Colorectal cancer || id:ukb-saige-153	NIF3L1	Wald ratio	1	-0.0150034	0.0438301	0.732119	-0.10091	0.0709037	0.985109	0.904014	1.07348	0.952368
finn-pQTL-s-R10-seq_2992_59	ukb-saige-153	Colorectal cancer || id:ukb-saige-153	IL17RA	Wald ratio	1	0.00756825	0.0227047	0.738883	-0.036933	0.0520695	1.0076	0.963741	1.05345	0.952368
finn-pQTL-s-R10-seq_3581_53	ukb-saige-153	Colorectal cancer || id:ukb-saige-153	AHSG	Wald ratio	1	-0.0169962	0.0516339	0.74203	-0.118199	0.0842063	0.983147	0.88852	1.08785	0.952368
finn-pQTL-s-R10-seq_4131_72	ukb-saige-153	Colorectal cancer || id:ukb-saige-153	FN1	Wald ratio	1	0.0142671	0.0422729	0.73574	-0.0685879	0.0971221	1.01437	0.933711	1.10199	0.952368
finn-pQTL-s-R10-seq_8397_147	ukb-saige-153	Colorectal cancer || id:ukb-saige-153	QSOX2	Wald ratio	1	-0.0163827	0.0498604	0.74248	-0.114109	0.0813437	0.983751	0.892161	1.08474	0.952368
finn-pQTL-s-R10-seq_9185_15	ukb-saige-153	Colorectal cancer || id:ukb-saige-153	TFF1	Wald ratio	1	-0.0158399	0.0471427	0.736871	-0.10824	0.0765597	0.984285	0.897413	1.07957	0.952368
finn-pQTL-s-R10-seq_7849_3	ukb-saige-153	Colorectal cancer || id:ukb-saige-153	QPCT	Inverse variance weighted	2	-0.0163564	0.0616056	0.790623	-0.137103	0.104391	0.983777	0.87188	1.11003	0.953975
finn-pQTL-s-R10-seq_12446_49	ukb-saige-153	Colorectal cancer || id:ukb-saige-153	GSTA1	Wald ratio	1	-0.0150344	0.0479356	0.753797	-0.108988	0.0789194	0.985078	0.896741	1.08212	0.954038
finn-pQTL-s-R10-seq_12571_14	ukb-saige-153	Colorectal cancer || id:ukb-saige-153	ARL3	Wald ratio	1	0.0282148	0.0872092	0.746294	-0.142715	0.199145	1.02862	0.867001	1.22036	0.954038
finn-pQTL-s-R10-seq_14105_5	ukb-saige-153	Colorectal cancer || id:ukb-saige-153	SERPINA4	Wald ratio	1	0.014031	0.0450376	0.755391	-0.0742428	0.102305	1.01413	0.928446	1.10772	0.954038
finn-pQTL-s-R10-seq_17138_8	ukb-saige-153	Colorectal cancer || id:ukb-saige-153	GSTA1	Wald ratio	1	-0.013859	0.044188	0.753797	-0.100467	0.0727495	0.986237	0.904415	1.07546	0.954038
finn-pQTL-s-R10-seq_17153_46	ukb-saige-153	Colorectal cancer || id:ukb-saige-153	KIR2DL3	Wald ratio	1	-0.0288179	0.092629	0.755716	-0.210371	0.152735	0.971593	0.810284	1.16502	0.954038
finn-pQTL-s-R10-seq_17738_7	ukb-saige-153	Colorectal cancer || id:ukb-saige-153	CRNN	Wald ratio	1	-0.0215513	0.0696271	0.756923	-0.15802	0.114918	0.978679	0.853832	1.12178	0.954038
finn-pQTL-s-R10-seq_18215_5	ukb-saige-153	Colorectal cancer || id:ukb-saige-153	THG1L	Wald ratio	1	0.0130011	0.040285	0.746902	-0.0659575	0.0919597	1.01309	0.936171	1.09632	0.954038
finn-pQTL-s-R10-seq_3212_30	ukb-saige-153	Colorectal cancer || id:ukb-saige-153	ASAH2	Wald ratio	1	-0.0130545	0.0414673	0.752902	-0.0943303	0.0682213	0.98703	0.909982	1.0706	0.954038
finn-pQTL-s-R10-seq_4153_11	ukb-saige-153	Colorectal cancer || id:ukb-saige-153	SERPINA3	Wald ratio	1	0.0185247	0.0596198	0.756018	-0.09833	0.135379	1.0187	0.90635	1.14497	0.954038
finn-pQTL-s-R10-seq_6462_12	ukb-saige-153	Colorectal cancer || id:ukb-saige-153	TIMP4	Wald ratio	1	0.0143318	0.0456011	0.753304	-0.0750464	0.10371	1.01443	0.9277	1.10928	0.954038
finn-pQTL-s-R10-seq_3449_58	ukb-saige-153	Colorectal cancer || id:ukb-saige-153	SERPINA4	Wald ratio	1	0.0131328	0.0437761	0.764177	-0.0726684	0.0989341	1.01322	0.929909	1.10399	0.954893
finn-pQTL-s-R10-seq_4435_66	ukb-saige-153	Colorectal cancer || id:ukb-saige-153	ENPP7	Wald ratio	1	-0.00761543	0.0253848	0.764177	-0.0573695	0.0421387	0.992413	0.944245	1.04304	0.954893
finn-pQTL-s-R10-seq_5676_54	ukb-saige-153	Colorectal cancer || id:ukb-saige-153	ASIP	Wald ratio	1	0.00996305	0.0326063	0.759943	-0.0539454	0.0738715	1.01001	0.947484	1.07667	0.954893
finn-pQTL-s-R10-seq_7015_8	ukb-saige-153	Colorectal cancer || id:ukb-saige-153	LILRB5	Wald ratio	1	-0.00613543	0.0204514	0.764177	-0.0462202	0.0339494	0.993883	0.954832	1.03453	0.954893
finn-pQTL-s-R10-seq_8687_26	ukb-saige-153	Colorectal cancer || id:ukb-saige-153	TMEM106B	Wald ratio	1	-0.0198676	0.0662252	0.764177	-0.149669	0.109934	0.980329	0.860993	1.1162	0.954893
finn-pQTL-s-R10-seq_10620_21	ukb-saige-153	Colorectal cancer || id:ukb-saige-153	MSMB	Wald ratio	1	0.00640268	0.0216706	0.767647	-0.0360717	0.0488771	1.00642	0.964571	1.05009	0.956262
finn-pQTL-s-R10-seq_3434_34	ukb-saige-153	Colorectal cancer || id:ukb-saige-153	FN1	Wald ratio	1	0.0122007	0.0418311	0.770541	-0.0697882	0.0941897	1.01228	0.932591	1.09877	0.956262
finn-pQTL-s-R10-seq_3435_53	ukb-saige-153	Colorectal cancer || id:ukb-saige-153	FN1	Wald ratio	1	0.0123177	0.042232	0.770541	-0.0704571	0.0950925	1.01239	0.931968	1.09976	0.956262
finn-pQTL-s-R10-seq_6255_74	ukb-saige-153	Colorectal cancer || id:ukb-saige-153	CPXM1	Wald ratio	1	-0.0213061	0.0729661	0.770287	-0.16432	0.121707	0.978919	0.848471	1.12942	0.956262
finn-pQTL-s-R10-seq_10512_13	ukb-saige-153	Colorectal cancer || id:ukb-saige-153	CSF2RB	Wald ratio	1	0.00728717	0.0255051	0.775097	-0.0427028	0.0572771	1.00731	0.958196	1.05895	0.958638
finn-pQTL-s-R10-seq_14107_1	ukb-saige-153	Colorectal cancer || id:ukb-saige-153	MTHFS	Wald ratio	1	-0.0162607	0.0567235	0.774368	-0.127439	0.0949174	0.983871	0.880347	1.09957	0.958638
finn-pQTL-s-R10-seq_19558_10	ukb-saige-153	Colorectal cancer || id:ukb-saige-153	LRP4	Wald ratio	1	-0.0129344	0.0460376	0.778747	-0.103168	0.0772993	0.987149	0.901975	1.08037	0.959882
finn-pQTL-s-R10-seq_3235_50	ukb-saige-153	Colorectal cancer || id:ukb-saige-153	WFIKKN2	Wald ratio	1	-0.0111747	0.0395414	0.777477	-0.0886759	0.0663264	0.988887	0.915142	1.06858	0.959882
finn-pQTL-s-R10-seq_7059_14	ukb-saige-153	Colorectal cancer || id:ukb-saige-153	LILRA6	Wald ratio	1	-0.0180809	0.0647898	0.780191	-0.145069	0.108907	0.982082	0.864963	1.11506	0.960032
finn-pQTL-s-R10-seq_5621_64	ukb-saige-153	Colorectal cancer || id:ukb-saige-153	THSD1	Wald ratio	1	-0.011468	0.0414121	0.781839	-0.0926357	0.0696997	0.988598	0.911526	1.07219	0.960432
finn-pQTL-s-R10-seq_10569_28	ukb-saige-153	Colorectal cancer || id:ukb-saige-153	MFAP2	Wald ratio	1	0.0130464	0.0498134	0.793395	-0.084588	0.110681	1.01313	0.918891	1.11704	0.960658
finn-pQTL-s-R10-seq_12449_16	ukb-saige-153	Colorectal cancer || id:ukb-saige-153	PPIH	Wald ratio	1	0.124565	0.536589	0.816427	-0.927149	1.17628	1.13266	0.39568	3.24229	0.960658
finn-pQTL-s-R10-seq_14068_29	ukb-saige-153	Colorectal cancer || id:ukb-saige-153	CCL25	Wald ratio	1	-0.0207997	0.0817133	0.799074	-0.180958	0.139358	0.979415	0.834471	1.14954	0.960658
finn-pQTL-s-R10-seq_14101_2	ukb-saige-153	Colorectal cancer || id:ukb-saige-153	CNTFR	Wald ratio	1	0.0278472	0.106085	0.792936	-0.180079	0.235773	1.02824	0.835204	1.26589	0.960658
finn-pQTL-s-R10-seq_15475_4	ukb-saige-153	Colorectal cancer || id:ukb-saige-153	PLTP	Wald ratio	1	0.00842453	0.035541	0.812628	-0.0612358	0.0780849	1.00846	0.940601	1.08121	0.960658
finn-pQTL-s-R10-seq_15602_43	ukb-saige-153	Colorectal cancer || id:ukb-saige-153	IL6R	Wald ratio	1	0.00463985	0.0189031	0.806104	-0.0324102	0.0416899	1.00465	0.968109	1.04257	0.960658
finn-pQTL-s-R10-seq_16318_12	ukb-saige-153	Colorectal cancer || id:ukb-saige-153	ACVRL1	Wald ratio	1	0.0210431	0.0846064	0.803579	-0.144785	0.186872	1.02127	0.865208	1.20547	0.960658
finn-pQTL-s-R10-seq_16605_2	ukb-saige-153	Colorectal cancer || id:ukb-saige-153	C1QTNF9	Wald ratio	1	0.010752	0.0405404	0.790842	-0.0687072	0.0902113	1.01081	0.9336	1.09441	0.960658
finn-pQTL-s-R10-seq_16773_29	ukb-saige-153	Colorectal cancer || id:ukb-saige-153	SCUBE3	Wald ratio	1	0.0165853	0.0652537	0.799367	-0.111312	0.144483	1.01672	0.89466	1.15544	0.960658
finn-pQTL-s-R10-seq_16892_23	ukb-saige-153	Colorectal cancer || id:ukb-saige-153	ENPP2	Wald ratio	1	0.0181878	0.0774664	0.814377	-0.133646	0.170022	1.01835	0.874899	1.18533	0.960658
finn-pQTL-s-R10-seq_20444_12	ukb-saige-153	Colorectal cancer || id:ukb-saige-153	TPPP3	Wald ratio	1	-0.0181916	0.0719204	0.800314	-0.159156	0.122772	0.981973	0.852864	1.13063	0.960658
finn-pQTL-s-R10-seq_21433_3	ukb-saige-153	Colorectal cancer || id:ukb-saige-153	BTN3A2	Wald ratio	1	-0.00553857	0.02352	0.813833	-0.0516377	0.0405605	0.994477	0.949673	1.04139	0.960658
finn-pQTL-s-R10-seq_23181_2	ukb-saige-153	Colorectal cancer || id:ukb-saige-153	LTK	Wald ratio	1	0.00819561	0.032197	0.799074	-0.0549106	0.0713018	1.00823	0.94657	1.07391	0.960658
finn-pQTL-s-R10-seq_23416_47	ukb-saige-153	Colorectal cancer || id:ukb-saige-153	SNX15	Wald ratio	1	0.0137855	0.0543761	0.799866	-0.0927917	0.120363	1.01388	0.911383	1.12791	0.960658
finn-pQTL-s-R10-seq_2711_6	ukb-saige-153	Colorectal cancer || id:ukb-saige-153	CNTFR	Wald ratio	1	0.0304805	0.116116	0.792936	-0.197108	0.258069	1.03095	0.821102	1.29443	0.960658
finn-pQTL-s-R10-seq_2993_1	ukb-saige-153	Colorectal cancer || id:ukb-saige-153	IL18RAP	Wald ratio	1	-0.0172324	0.0720628	0.811004	-0.158476	0.124011	0.982915	0.853444	1.13203	0.960658
finn-pQTL-s-R10-seq_3004_67	ukb-saige-153	Colorectal cancer || id:ukb-saige-153	PDCD1LG2	Wald ratio	1	-0.00837517	0.035488	0.813433	-0.0779317	0.0611814	0.99166	0.925028	1.06309	0.960658
finn-pQTL-s-R10-seq_3186_2	ukb-saige-153	Colorectal cancer || id:ukb-saige-153	C2	Wald ratio	1	-0.018894	0.069278	0.785063	-0.154679	0.116891	0.981283	0.85669	1.124	0.960658
finn-pQTL-s-R10-seq_3459_49	ukb-saige-153	Colorectal cancer || id:ukb-saige-153	PDGFRB	Wald ratio	1	0.00459725	0.0185658	0.804429	-0.0317918	0.0409863	1.00461	0.968708	1.04184	0.960658
finn-pQTL-s-R10-seq_4139_71	ukb-saige-153	Colorectal cancer || id:ukb-saige-153	IL6R	Wald ratio	1	0.0046286	0.0188573	0.806104	-0.0323316	0.0415888	1.00464	0.968185	1.04247	0.960658
finn-pQTL-s-R10-seq_4297_62	ukb-saige-153	Colorectal cancer || id:ukb-saige-153	SPON1	Wald ratio	1	0.0131976	0.0565612	0.815503	-0.0976624	0.124058	1.01329	0.906955	1.13208	0.960658
finn-pQTL-s-R10-seq_4775_34	ukb-saige-153	Colorectal cancer || id:ukb-saige-153	GSN	Wald ratio	1	0.0293078	0.117231	0.802587	-0.200465	0.259081	1.02974	0.81835	1.29574	0.960658
finn-pQTL-s-R10-seq_6060_2	ukb-saige-153	Colorectal cancer || id:ukb-saige-153	PIP	Wald ratio	1	0.0154407	0.0653261	0.813151	-0.112598	0.14348	1.01556	0.893509	1.15428	0.960658
finn-pQTL-s-R10-seq_8092_29	ukb-saige-153	Colorectal cancer || id:ukb-saige-153	IL6R	Wald ratio	1	0.00465253	0.0189547	0.806104	-0.0324988	0.0418038	1.00466	0.968024	1.04269	0.960658
finn-pQTL-s-R10-seq_9326_33	ukb-saige-153	Colorectal cancer || id:ukb-saige-153	ITIH2	Wald ratio	1	0.00939962	0.038453	0.806887	-0.0659682	0.0847675	1.00944	0.936161	1.08846	0.960658
finn-pQTL-s-R10-seq_9578_263	ukb-saige-153	Colorectal cancer || id:ukb-saige-153	MANSC4	Wald ratio	1	0.0103829	0.0418667	0.804134	-0.0716758	0.0924417	1.01044	0.930833	1.09685	0.960658
finn-pQTL-s-R10-seq_12727_7	ukb-saige-153	Colorectal cancer || id:ukb-saige-153	PTGFRN	Inverse variance weighted	2	-0.00850538	0.0357666	0.812035	-0.078608	0.0615972	0.991531	0.924402	1.06353	0.961353
finn-pQTL-s-R10-seq_20561_15	ukb-saige-153	Colorectal cancer || id:ukb-saige-153	CNTN6	Inverse variance weighted	2	-0.00704666	0.0310759	0.820613	-0.0679554	0.0538621	0.992978	0.934302	1.05534	0.961353
finn-pQTL-s-R10-seq_9394_19	ukb-saige-153	Colorectal cancer || id:ukb-saige-153	CPQ	Inverse variance weighted	2	-0.00965302	0.0431727	0.823076	-0.0942716	0.0749655	0.990393	0.910036	1.07785	0.961353
finn-pQTL-s-R10-seq_9748_31	ukb-saige-153	Colorectal cancer || id:ukb-saige-153	GSTM3	Inverse variance weighted	2	0.0105985	0.0450193	0.813883	-0.0776394	0.0988363	1.01065	0.925298	1.10389	0.961353
finn-pQTL-s-R10-seq_19556_12	ukb-saige-153	Colorectal cancer || id:ukb-saige-153	CR1	Wald ratio	1	-0.00872406	0.0381678	0.819202	-0.0835329	0.0660848	0.991314	0.919861	1.06832	0.962364
finn-pQTL-s-R10-seq_3313_21	ukb-saige-153	Colorectal cancer || id:ukb-saige-153	FCN2	Wald ratio	1	0.00715388	0.0320042	0.823123	-0.0555744	0.0698821	1.00718	0.945942	1.07238	0.963851
finn-pQTL-s-R10-seq_7861_9	ukb-saige-153	Colorectal cancer || id:ukb-saige-153	ROR2	Wald ratio	1	0.0164147	0.0733422	0.822906	-0.127336	0.160165	1.01655	0.880438	1.1737	0.963851
finn-pQTL-s-R10-seq_11586_2	ukb-saige-153	Colorectal cancer || id:ukb-saige-153	LRRN1	Wald ratio	1	0.0162124	0.075888	0.830831	-0.132528	0.164953	1.01634	0.875878	1.17934	0.964392
finn-pQTL-s-R10-seq_13708_56	ukb-saige-153	Colorectal cancer || id:ukb-saige-153	KLK8	Wald ratio	1	-0.0076872	0.0363395	0.832467	-0.0789126	0.0635382	0.992342	0.924121	1.0656	0.964392
finn-pQTL-s-R10-seq_19496_1	ukb-saige-153	Colorectal cancer || id:ukb-saige-153	NPL	Wald ratio	1	-0.0164233	0.078206	0.833668	-0.169707	0.13686	0.983711	0.843912	1.14667	0.964392
finn-pQTL-s-R10-seq_21289_36	ukb-saige-153	Colorectal cancer || id:ukb-saige-153	SPAG7	Wald ratio	1	-0.02162	0.103296	0.834212	-0.224079	0.180839	0.978612	0.799252	1.19822	0.964392
finn-pQTL-s-R10-seq_2834_54	ukb-saige-153	Colorectal cancer || id:ukb-saige-153	KLK8	Wald ratio	1	-0.00781833	0.0369594	0.832467	-0.0802587	0.0646221	0.992212	0.922878	1.06676	0.964392
finn-pQTL-s-R10-seq_4154_57	ukb-saige-153	Colorectal cancer || id:ukb-saige-153	SELP	Wald ratio	1	0.0126008	0.0578955	0.827704	-0.100874	0.126076	1.01268	0.904047	1.13437	0.964392
finn-pQTL-s-R10-seq_5430_66	ukb-saige-153	Colorectal cancer || id:ukb-saige-153	SIRPA	Wald ratio	1	-0.00410029	0.018793	0.827287	-0.0409345	0.032734	0.995908	0.959892	1.03328	0.964392
finn-pQTL-s-R10-seq_9884_8	ukb-saige-153	Colorectal cancer || id:ukb-saige-153	PPIL1	Wald ratio	1	0.00938104	0.0425274	0.825413	-0.0739726	0.0927347	1.00943	0.928697	1.09717	0.964392
finn-pQTL-s-R10-seq_10605_22	ukb-saige-153	Colorectal cancer || id:ukb-saige-153	APMAP	Wald ratio	1	-0.0108259	0.0614444	0.860144	-0.131257	0.109605	0.989232	0.876992	1.11584	0.964393
finn-pQTL-s-R10-seq_11145_72	ukb-saige-153	Colorectal cancer || id:ukb-saige-153	KIAA1549L	Wald ratio	1	-0.00640243	0.0327566	0.845037	-0.0706054	0.0578005	0.993618	0.93183	1.0595	0.964393
finn-pQTL-s-R10-seq_11387_3	ukb-saige-153	Colorectal cancer || id:ukb-saige-153	ATF6B	Wald ratio	1	0.0152834	0.0815112	0.851269	-0.144479	0.175045	1.0154	0.865473	1.1913	0.964393
finn-pQTL-s-R10-seq_13125_45	ukb-saige-153	Colorectal cancer || id:ukb-saige-153	VTN	Wald ratio	1	-0.00339698	0.0182914	0.852669	-0.0392481	0.0324542	0.996609	0.961512	1.03299	0.964393
finn-pQTL-s-R10-seq_15333_11	ukb-saige-153	Colorectal cancer || id:ukb-saige-153	SDF2	Wald ratio	1	-0.00482047	0.0259564	0.852669	-0.055695	0.0460541	0.995191	0.945828	1.04713	0.964393
finn-pQTL-s-R10-seq_15388_24	ukb-saige-153	Colorectal cancer || id:ukb-saige-153	FCGR3A	Wald ratio	1	0.0143494	0.0734153	0.845037	-0.129545	0.158243	1.01445	0.878495	1.17145	0.964393
finn-pQTL-s-R10-seq_16900_29	ukb-saige-153	Colorectal cancer || id:ukb-saige-153	MDGA1	Wald ratio	1	-0.00392916	0.0206281	0.848936	-0.0443602	0.0365019	0.996079	0.956609	1.03718	0.964393
finn-pQTL-s-R10-seq_17161_1	ukb-saige-153	Colorectal cancer || id:ukb-saige-153	DDOST	Wald ratio	1	0.055322	0.318915	0.862282	-0.569751	0.680395	1.05688	0.565666	1.97466	0.964393
finn-pQTL-s-R10-seq_20950_159	ukb-saige-153	Colorectal cancer || id:ukb-saige-153	PRTFDC1	Wald ratio	1	-0.0112188	0.0635734	0.859924	-0.135823	0.113385	0.988844	0.872997	1.12006	0.964393
finn-pQTL-s-R10-seq_21766_50	ukb-saige-153	Colorectal cancer || id:ukb-saige-153	SGSH	Wald ratio	1	0.0163185	0.0888454	0.85427	-0.157818	0.190455	1.01645	0.854005	1.2098	0.964393
finn-pQTL-s-R10-seq_21767_129	ukb-saige-153	Colorectal cancer || id:ukb-saige-153	GALNT14	Wald ratio	1	0.00506229	0.0248151	0.838353	-0.0435754	0.0536999	1.00508	0.95736	1.05517	0.964393
finn-pQTL-s-R10-seq_23018_4	ukb-saige-153	Colorectal cancer || id:ukb-saige-153	REG1B	Wald ratio	1	0.00720289	0.0418772	0.863438	-0.0748765	0.0892823	1.00723	0.927858	1.09339	0.964393
finn-pQTL-s-R10-seq_23666_35	ukb-saige-153	Colorectal cancer || id:ukb-saige-153	ATIC	Wald ratio	1	-0.0108629	0.0594875	0.855105	-0.127458	0.105733	0.989196	0.88033	1.11152	0.964393
finn-pQTL-s-R10-seq_3479_71	ukb-saige-153	Colorectal cancer || id:ukb-saige-153	PRSS3	Wald ratio	1	0.0169266	0.0830943	0.838585	-0.145938	0.179791	1.01707	0.864211	1.19697	0.964393
finn-pQTL-s-R10-seq_5128_53	ukb-saige-153	Colorectal cancer || id:ukb-saige-153	SLAMF6	Wald ratio	1	0.0139744	0.0756947	0.853531	-0.134387	0.162336	1.01407	0.874251	1.17626	0.964393
finn-pQTL-s-R10-seq_5601_2	ukb-saige-153	Colorectal cancer || id:ukb-saige-153	PGLYRP2	Wald ratio	1	0.00944596	0.0547866	0.863112	-0.0979357	0.116828	1.00949	0.906707	1.12393	0.964393
finn-pQTL-s-R10-seq_7787_25	ukb-saige-153	Colorectal cancer || id:ukb-saige-153	LILRA5	Wald ratio	1	-0.00862317	0.0483739	0.858518	-0.103436	0.0861897	0.991414	0.901734	1.09001	0.964393
finn-pQTL-s-R10-seq_7957_2	ukb-saige-153	Colorectal cancer || id:ukb-saige-153	SCG3	Wald ratio	1	0.00859344	0.0467035	0.854013	-0.0829454	0.100132	1.00863	0.920401	1.10532	0.964393
finn-pQTL-s-R10-seq_8280_238	ukb-saige-153	Colorectal cancer || id:ukb-saige-153	VTN	Wald ratio	1	-0.0121379	0.0653581	0.852669	-0.14024	0.115964	0.987935	0.86915	1.12296	0.964393
finn-pQTL-s-R10-seq_8766_29	ukb-saige-153	Colorectal cancer || id:ukb-saige-153	LILRA5	Wald ratio	1	-0.00808043	0.0453292	0.858518	-0.0969257	0.0807648	0.991952	0.907623	1.08412	0.964393
finn-pQTL-s-R10-seq_9294_45	ukb-saige-153	Colorectal cancer || id:ukb-saige-153	MFAP2	Wald ratio	1	-0.0147528	0.0786816	0.851269	-0.168969	0.139463	0.985355	0.844535	1.14966	0.964393
finn-pQTL-s-R10-seq_9482_110	ukb-saige-153	Colorectal cancer || id:ukb-saige-153	NUDT9	Wald ratio	1	-0.0129703	0.0681491	0.849056	-0.146543	0.120602	0.987113	0.863689	1.12818	0.964393
finn-pQTL-s-R10-seq_4979_34	ukb-saige-153	Colorectal cancer || id:ukb-saige-153	DPT	Wald ratio	1	0.0092213	0.0548293	0.86644	-0.0982442	0.116687	1.00926	0.906428	1.12377	0.966261
finn-pQTL-s-R10-seq_13119_26	ukb-saige-153	Colorectal cancer || id:ukb-saige-153	SERPINA10	Wald ratio	1	-0.00506022	0.0312226	0.871252	-0.0662565	0.0561361	0.994953	0.935891	1.05774	0.969268
finn-pQTL-s-R10-seq_9870_17	ukb-saige-153	Colorectal cancer || id:ukb-saige-153	WARS1	Wald ratio	1	-0.0134017	0.083053	0.871807	-0.176186	0.149382	0.986688	0.838462	1.16112	0.969268
finn-pQTL-s-R10-seq_17333_20	ukb-saige-153	Colorectal cancer || id:ukb-saige-153	ACADM	Wald ratio	1	-0.0114788	0.0721524	0.873597	-0.152898	0.12994	0.988587	0.858218	1.13876	0.969773
finn-pQTL-s-R10-seq_3633_70	ukb-saige-153	Colorectal cancer || id:ukb-saige-153	NID2	Wald ratio	1	0.0129921	0.0825537	0.874948	-0.148813	0.174797	1.01308	0.86173	1.191	0.969789
finn-pQTL-s-R10-seq_6583_67	ukb-saige-153	Colorectal cancer || id:ukb-saige-153	SERPINA10	Inverse variance weighted	2	0.012435	0.0605821	0.83737	-0.106306	0.131176	1.01251	0.89915	1.14017	0.970285
finn-pQTL-s-R10-seq_15584_9	ukb-saige-153	Colorectal cancer || id:ukb-saige-153	CFHR2	MR Egger	3	0.0328114	0.761434	0.972584	-1.4596	1.52522	1.03336	0.232329	4.59616	0.972584
finn-pQTL-s-R10-seq_15615_8	ukb-saige-153	Colorectal cancer || id:ukb-saige-153	LILRB3	MR Egger	3	0.055246	0.0519936	0.480698	-0.0466615	0.157154	1.0568	0.95441	1.17018	0.972584
finn-pQTL-s-R10-seq_21797_4	ukb-saige-153	Colorectal cancer || id:ukb-saige-153	HLA-C	MR Egger	3	-0.0579816	0.0356252	0.35075	-0.127807	0.0118439	0.943667	0.880023	1.01191	0.972584
finn-pQTL-s-R10-seq_24215_8	ukb-saige-153	Colorectal cancer || id:ukb-saige-153	PRRX1	MR Egger	3	-0.00303681	0.0594774	0.967524	-0.119613	0.113539	0.996968	0.887264	1.12024	0.972584
finn-pQTL-s-R10-seq_2730_58	ukb-saige-153	Colorectal cancer || id:ukb-saige-153	MICA	MR Egger	3	-0.0109161	0.0786551	0.912208	-0.16508	0.143248	0.989143	0.847826	1.15402	0.972584
finn-pQTL-s-R10-seq_3054_3	ukb-saige-153	Colorectal cancer || id:ukb-saige-153	HP	MR Egger	3	-0.122922	0.186819	0.629513	-0.489088	0.243244	0.884333	0.613185	1.27538	0.972584
finn-pQTL-s-R10-seq_4459_68	ukb-saige-153	Colorectal cancer || id:ukb-saige-153	PCSK7	MR Egger	3	-0.00871404	0.0505022	0.891224	-0.107698	0.0902703	0.991324	0.897898	1.09447	0.972584
finn-pQTL-s-R10-seq_5584_21	ukb-saige-153	Colorectal cancer || id:ukb-saige-153	TCN2	MR Egger	3	0.344505	0.226263	0.369955	-0.0989705	0.787981	1.41129	0.905769	2.19895	0.972584
finn-pQTL-s-R10-seq_5648_28	ukb-saige-153	Colorectal cancer || id:ukb-saige-153	CTRB2	MR Egger	3	0.0429213	0.176743	0.848335	-0.303494	0.389337	1.04386	0.738234	1.476	0.972584
finn-pQTL-s-R10-seq_5698_60	ukb-saige-153	Colorectal cancer || id:ukb-saige-153	TNXB	MR Egger	3	-0.0269119	0.0978122	0.829071	-0.218624	0.1648	0.973447	0.803624	1.17916	0.972584
finn-pQTL-s-R10-seq_6247_9	ukb-saige-153	Colorectal cancer || id:ukb-saige-153	SIRPB1	MR Egger	3	0.0462654	0.0542005	0.550178	-0.0599675	0.152498	1.04735	0.941795	1.16474	0.972584
finn-pQTL-s-R10-seq_8960_3	ukb-saige-153	Colorectal cancer || id:ukb-saige-153	ERAP2	MR Egger	3	-0.00550169	0.0408298	0.914731	-0.0855281	0.0745248	0.994513	0.918027	1.07737	0.972584
finn-pQTL-s-R10-seq_9409_11	ukb-saige-153	Colorectal cancer || id:ukb-saige-153	TPSAB1	MR Egger	3	-0.341139	0.67083	0.700502	-1.65597	0.973688	0.71096	0.190908	2.64769	0.972584
finn-pQTL-s-R10-seq_24687_18	ukb-saige-153	Colorectal cancer || id:ukb-saige-153	TTPAL	Wald ratio	1	0.0041711	0.0273728	0.878886	-0.0494797	0.0578219	1.00418	0.951725	1.05953	0.97267
finn-pQTL-s-R10-seq_17329_2	ukb-saige-153	Colorectal cancer || id:ukb-saige-153	BDH2	Wald ratio	1	-0.0111007	0.0763171	0.884352	-0.160682	0.138481	0.988961	0.851563	1.14853	0.972787
finn-pQTL-s-R10-seq_17682_1	ukb-saige-153	Colorectal cancer || id:ukb-saige-153	CD46	Wald ratio	1	0.00885007	0.0608442	0.884352	-0.110405	0.128105	1.00889	0.895472	1.13667	0.972787
finn-pQTL-s-R10-seq_17832_12	ukb-saige-153	Colorectal cancer || id:ukb-saige-153	IDI2	Wald ratio	1	0.00985223	0.0656816	0.880765	-0.118884	0.138588	1.0099	0.887911	1.14865	0.972787
finn-pQTL-s-R10-seq_4278_14	ukb-saige-153	Colorectal cancer || id:ukb-saige-153	P4HB	Wald ratio	1	-0.0119071	0.0818611	0.884352	-0.172355	0.148541	0.988164	0.841681	1.16014	0.972787
finn-pQTL-s-R10-seq_11208_15	ukb-saige-153	Colorectal cancer || id:ukb-saige-153	NAGPA	Wald ratio	1	-0.00673511	0.0589322	0.909011	-0.122242	0.108772	0.993288	0.884934	1.11491	0.974186
finn-pQTL-s-R10-seq_14086_11	ukb-saige-153	Colorectal cancer || id:ukb-saige-153	SMPDL3A	Wald ratio	1	0.00469334	0.0415696	0.910107	-0.0767831	0.0861698	1.0047	0.926091	1.08999	0.974186
finn-pQTL-s-R10-seq_15385_116	ukb-saige-153	Colorectal cancer || id:ukb-saige-153	FABP2	Wald ratio	1	-0.00347787	0.0271709	0.898149	-0.0567328	0.049777	0.996528	0.944847	1.05104	0.974186
finn-pQTL-s-R10-seq_16825_20	ukb-saige-153	Colorectal cancer || id:ukb-saige-153	ATXN3	Wald ratio	1	0.00825586	0.0600426	0.890636	-0.109428	0.125939	1.00829	0.896347	1.13421	0.974186
finn-pQTL-s-R10-seq_18916_25	ukb-saige-153	Colorectal cancer || id:ukb-saige-153	ITPA	Wald ratio	1	0.0034255	0.0264991	0.897145	-0.0485128	0.0553638	1.00343	0.952645	1.05693	0.974186
finn-pQTL-s-R10-seq_19251_56	ukb-saige-153	Colorectal cancer || id:ukb-saige-153	SRGN	Wald ratio	1	0.0101161	0.074185	0.891534	-0.135286	0.155519	1.01017	0.873466	1.16826	0.974186
finn-pQTL-s-R10-seq_20564_53	ukb-saige-153	Colorectal cancer || id:ukb-saige-153	THY1	Wald ratio	1	0.00791697	0.0695148	0.909326	-0.128332	0.144166	1.00795	0.879561	1.15508	0.974186
finn-pQTL-s-R10-seq_21549_144	ukb-saige-153	Colorectal cancer || id:ukb-saige-153	TECTB	Wald ratio	1	-0.0100699	0.072813	0.890005	-0.152783	0.132644	0.989981	0.858316	1.14184	0.974186
finn-pQTL-s-R10-seq_23340_37	ukb-saige-153	Colorectal cancer || id:ukb-saige-153	MRI1	Wald ratio	1	-0.0101429	0.0721503	0.888202	-0.151557	0.131272	0.989908	0.859369	1.14028	0.974186
finn-pQTL-s-R10-seq_23566_6	ukb-saige-153	Colorectal cancer || id:ukb-saige-153	APOL2	Wald ratio	1	0.00482496	0.0432236	0.911118	-0.0798934	0.0895433	1.00484	0.923215	1.09367	0.974186
finn-pQTL-s-R10-seq_2480_58	ukb-saige-153	Colorectal cancer || id:ukb-saige-153	TIMP3	Wald ratio	1	0.00578289	0.0489322	0.905924	-0.0901242	0.10169	1.0058	0.913818	1.10704	0.974186
finn-pQTL-s-R10-seq_3216_2	ukb-saige-153	Colorectal cancer || id:ukb-saige-153	PIGR	Wald ratio	1	-0.00757079	0.0662444	0.909011	-0.13741	0.122268	0.992458	0.871613	1.13006	0.974186
finn-pQTL-s-R10-seq_3280_49	ukb-saige-153	Colorectal cancer || id:ukb-saige-153	ACAN	Wald ratio	1	-0.0163428	0.140081	0.907124	-0.290901	0.258216	0.98379	0.747589	1.29462	0.974186
finn-pQTL-s-R10-seq_4771_10	ukb-saige-153	Colorectal cancer || id:ukb-saige-153	SMPDL3A	Wald ratio	1	0.00575934	0.0510113	0.910107	-0.0942229	0.105742	1.00578	0.91008	1.11153	0.974186
finn-pQTL-s-R10-seq_5124_62	ukb-saige-153	Colorectal cancer || id:ukb-saige-153	ICAM5	Wald ratio	1	-0.00359126	0.029179	0.902046	-0.060782	0.0535995	0.996415	0.941028	1.05506	0.974186
finn-pQTL-s-R10-seq_5124_69	ukb-saige-153	Colorectal cancer || id:ukb-saige-153	ICAM5	Wald ratio	1	-0.00372364	0.0302546	0.902046	-0.0630226	0.0555753	0.996283	0.938922	1.05715	0.974186
finn-pQTL-s-R10-seq_6409_57	ukb-saige-153	Colorectal cancer || id:ukb-saige-153	ADGRF5	Wald ratio	1	-0.00468194	0.0365033	0.897943	-0.0762284	0.0668645	0.995329	0.926605	1.06915	0.974186
finn-pQTL-s-R10-seq_8245_27	ukb-saige-153	Colorectal cancer || id:ukb-saige-153	ICAM5	Wald ratio	1	-0.00356651	0.0289779	0.902046	-0.0603632	0.0532302	0.99644	0.941423	1.05467	0.974186
finn-pQTL-s-R10-seq_9713_67	ukb-saige-153	Colorectal cancer || id:ukb-saige-153	PDGFRL	Wald ratio	1	-0.00775106	0.0645922	0.904483	-0.134352	0.11885	0.992279	0.874282	1.1262	0.974186
finn-pQTL-s-R10-seq_6467_65	ukb-saige-153	Colorectal cancer || id:ukb-saige-153	POGLUT1	Wald ratio	1	0.00615673	0.0562136	0.912787	-0.104022	0.116335	1.00618	0.901206	1.12337	0.974534
finn-pQTL-s-R10-seq_10970_3	ukb-saige-153	Colorectal cancer || id:ukb-saige-153	ART3	Wald ratio	1	-0.00556484	0.0632369	0.929877	-0.129509	0.118379	0.994451	0.878527	1.12567	0.979711
finn-pQTL-s-R10-seq_12338_27	ukb-saige-153	Colorectal cancer || id:ukb-saige-153	EGFLAM	Wald ratio	1	0.00790883	0.0932113	0.932382	-0.174785	0.190603	1.00794	0.839637	1.20998	0.979711
finn-pQTL-s-R10-seq_15452_5	ukb-saige-153	Colorectal cancer || id:ukb-saige-153	NT5E	Wald ratio	1	-0.00511681	0.0526731	0.922613	-0.108356	0.0981224	0.994896	0.897308	1.1031	0.979711
finn-pQTL-s-R10-seq_15533_97	ukb-saige-153	Colorectal cancer || id:ukb-saige-153	MSR1	Wald ratio	1	-0.00377139	0.0423752	0.929082	-0.0868268	0.079284	0.996236	0.916836	1.08251	0.979711
finn-pQTL-s-R10-seq_15583_18	ukb-saige-153	Colorectal cancer || id:ukb-saige-153	FCRLB	Wald ratio	1	0.00440011	0.0541552	0.935243	-0.101744	0.110544	1.00441	0.903261	1.11689	0.979711
finn-pQTL-s-R10-seq_15644_1	ukb-saige-153	Colorectal cancer || id:ukb-saige-153	BTD	Wald ratio	1	-0.00248139	0.0348736	0.943275	-0.0708336	0.0658708	0.997522	0.931617	1.06809	0.979711
finn-pQTL-s-R10-seq_18864_7	ukb-saige-153	Colorectal cancer || id:ukb-saige-153	PRSS3	Wald ratio	1	-0.00348146	0.0364724	0.923954	-0.0749673	0.0680044	0.996525	0.927774	1.07037	0.979711
finn-pQTL-s-R10-seq_19523_215	ukb-saige-153	Colorectal cancer || id:ukb-saige-153	PARK7	Wald ratio	1	0.005416	0.0689309	0.937374	-0.129689	0.140521	1.00543	0.878369	1.15087	0.979711
finn-pQTL-s-R10-seq_20120_101	ukb-saige-153	Colorectal cancer || id:ukb-saige-153	AMIGO1	Wald ratio	1	0.00480012	0.0660016	0.942023	-0.124563	0.134163	1.00481	0.882883	1.14358	0.979711
finn-pQTL-s-R10-seq_23296_29	ukb-saige-153	Colorectal cancer || id:ukb-saige-153	SFRP5	Wald ratio	1	0.00543346	0.0730707	0.940725	-0.137785	0.148652	1.00545	0.871286	1.16027	0.979711
finn-pQTL-s-R10-seq_3184_25	ukb-saige-153	Colorectal cancer || id:ukb-saige-153	F7	Wald ratio	1	0.0020088	0.0251099	0.936237	-0.0472067	0.0512243	1.00201	0.95389	1.05256	0.979711
finn-pQTL-s-R10-seq_3214_3	ukb-saige-153	Colorectal cancer || id:ukb-saige-153	NRP1	Wald ratio	1	-0.00525695	0.0722831	0.942023	-0.146932	0.136418	0.994757	0.863353	1.14616	0.979711
finn-pQTL-s-R10-seq_3299_29	ukb-saige-153	Colorectal cancer || id:ukb-saige-153	CNTN5	Wald ratio	1	0.00635565	0.0706184	0.928287	-0.132056	0.144768	1.00638	0.876292	1.15577	0.979711
finn-pQTL-s-R10-seq_3605_77	ukb-saige-153	Colorectal cancer || id:ukb-saige-153	MASP1	Wald ratio	1	-0.00598481	0.0673292	0.92917	-0.13795	0.12598	0.994033	0.871142	1.13426	0.979711
finn-pQTL-s-R10-seq_4127_75	ukb-saige-153	Colorectal cancer || id:ukb-saige-153	C6	Wald ratio	1	-0.0102551	0.123062	0.933586	-0.251456	0.230946	0.989797	0.777667	1.25979	0.979711
finn-pQTL-s-R10-seq_5542_22	ukb-saige-153	Colorectal cancer || id:ukb-saige-153	NRP1	Wald ratio	1	-0.0043747	0.0601522	0.942023	-0.122273	0.113524	0.995635	0.884907	1.12022	0.979711
finn-pQTL-s-R10-seq_7926_13	ukb-saige-153	Colorectal cancer || id:ukb-saige-153	SPINT3	Wald ratio	1	0.00398908	0.0465393	0.931694	-0.0872279	0.095206	1.004	0.916468	1.09989	0.979711
finn-pQTL-s-R10-seq_7970_315	ukb-saige-153	Colorectal cancer || id:ukb-saige-153	ART3	Wald ratio	1	-0.00592997	0.067386	0.929877	-0.138007	0.126147	0.994088	0.871093	1.13445	0.979711
finn-pQTL-s-R10-seq_9005_16	ukb-saige-153	Colorectal cancer || id:ukb-saige-153	PLXNA1	Wald ratio	1	-0.0064329	0.0739783	0.930706	-0.15143	0.138565	0.993588	0.859478	1.14862	0.979711
finn-pQTL-s-R10-seq_16913_8	ukb-saige-153	Colorectal cancer || id:ukb-saige-153	RNASET2	Inverse variance weighted	2	0.00631815	0.0401322	0.874903	-0.072341	0.0849773	1.00634	0.930214	1.08869	0.98123
finn-pQTL-s-R10-seq_3309_2	ukb-saige-153	Colorectal cancer || id:ukb-saige-153	FCGR2A	Inverse variance weighted	2	0.00586209	0.0348542	0.866435	-0.0624521	0.0741762	1.00588	0.939458	1.077	0.98123
finn-pQTL-s-R10-seq_5658_64	ukb-saige-153	Colorectal cancer || id:ukb-saige-153	F13B	Inverse variance weighted	2	0.00538796	0.0359977	0.881021	-0.0651676	0.0759435	1.0054	0.93691	1.0789	0.98123
finn-pQTL-s-R10-seq_5737_61	ukb-saige-153	Colorectal cancer || id:ukb-saige-153	SEMA4D	Inverse variance weighted	2	-0.00400227	0.0289054	0.889876	-0.0606568	0.0526522	0.996006	0.941146	1.05406	0.98123
finn-pQTL-s-R10-seq_6471_53	ukb-saige-153	Colorectal cancer || id:ukb-saige-153	CFHR4	Inverse variance weighted	2	-0.00458717	0.0286655	0.872862	-0.0607715	0.0515971	0.995423	0.941038	1.05295	0.98123
finn-pQTL-s-R10-seq_7145_1	ukb-saige-153	Colorectal cancer || id:ukb-saige-153	ITIH3	Inverse variance weighted	2	0.00526356	0.0337249	0.875975	-0.0608373	0.0713644	1.00528	0.940976	1.07397	0.98123
finn-pQTL-s-R10-seq_7227_75	ukb-saige-153	Colorectal cancer || id:ukb-saige-153	COCH	Inverse variance weighted	2	-0.00877954	0.065803	0.89386	-0.137753	0.120194	0.991259	0.871314	1.12772	0.98123
finn-pQTL-s-R10-seq_3298_52	ukb-saige-153	Colorectal cancer || id:ukb-saige-153	CNTN4	Wald ratio	1	-0.00402327	0.0649913	0.950639	-0.131406	0.12336	0.995985	0.876861	1.13129	0.985948
finn-pQTL-s-R10-seq_21567_214	ukb-saige-153	Colorectal cancer || id:ukb-saige-153	C1QTNF4	Wald ratio	1	-0.00374614	0.0686792	0.956501	-0.138357	0.130865	0.996261	0.870787	1.13981	0.985987
finn-pQTL-s-R10-seq_23200_25	ukb-saige-153	Colorectal cancer || id:ukb-saige-153	C1QTNF4	Wald ratio	1	-0.00281703	0.0516455	0.956501	-0.104042	0.0984081	0.997187	0.901187	1.10341	0.985987
finn-pQTL-s-R10-seq_25964_12	ukb-saige-153	Colorectal cancer || id:ukb-saige-153	C1QTNF4	Wald ratio	1	-0.00304983	0.0559135	0.956501	-0.11264	0.106541	0.996955	0.893472	1.11242	0.985987
finn-pQTL-s-R10-seq_5346_24	ukb-saige-153	Colorectal cancer || id:ukb-saige-153	CPNE1	Wald ratio	1	-0.00162107	0.0277898	0.953483	-0.0560891	0.0528469	0.99838	0.945455	1.05427	0.985987
finn-pQTL-s-R10-seq_8091_16	ukb-saige-153	Colorectal cancer || id:ukb-saige-153	MASP1	Wald ratio	1	-0.00245391	0.0460109	0.957466	-0.0926352	0.0877274	0.997549	0.911526	1.09169	0.985987
finn-pQTL-s-R10-seq_13552_7	ukb-saige-153	Colorectal cancer || id:ukb-saige-153	SWAP70	Wald ratio	1	-0.00240726	0.0551663	0.965194	-0.110533	0.105719	0.997596	0.895357	1.11151	0.986007
finn-pQTL-s-R10-seq_14123_34	ukb-saige-153	Colorectal cancer || id:ukb-saige-153	VSIR	Wald ratio	1	-0.00338684	0.078158	0.965436	-0.156576	0.149803	0.996619	0.855066	1.16161	0.986007
finn-pQTL-s-R10-seq_23178_95	ukb-saige-153	Colorectal cancer || id:ukb-saige-153	HNMT	Wald ratio	1	0.00320855	0.0681818	0.962466	-0.130428	0.136845	1.00321	0.87772	1.14665	0.986007
finn-pQTL-s-R10-seq_23203_3	ukb-saige-153	Colorectal cancer || id:ukb-saige-153	SCPEP1	Wald ratio	1	-0.00159184	0.0384694	0.966994	-0.076992	0.0738083	0.998409	0.925897	1.0766	0.986007
finn-pQTL-s-R10-seq_5632_6	ukb-saige-153	Colorectal cancer || id:ukb-saige-153	CRTAC1	Wald ratio	1	0.00240307	0.0528675	0.963745	-0.101217	0.106023	1.00241	0.903737	1.11185	0.986007
finn-pQTL-s-R10-seq_6416_8	ukb-saige-153	Colorectal cancer || id:ukb-saige-153	GKN2	Wald ratio	1	0.00179082	0.0390724	0.963443	-0.074791	0.0783726	1.00179	0.927937	1.08153	0.986007
finn-pQTL-s-R10-seq_8005_1	ukb-saige-153	Colorectal cancer || id:ukb-saige-153	MXRA7	Wald ratio	1	-0.00235814	0.0551905	0.965919	-0.110532	0.105815	0.997645	0.895358	1.11162	0.986007
finn-pQTL-s-R10-seq_17490_4	ukb-saige-153	Colorectal cancer || id:ukb-saige-153	SH3BGRL3	Wald ratio	1	0.0023193	0.0674216	0.972558	-0.129827	0.134466	1.00232	0.878247	1.14393	0.986851
finn-pQTL-s-R10-seq_18397_5	ukb-saige-153	Colorectal cancer || id:ukb-saige-153	AKR1C4	Wald ratio	1	-0.00138995	0.0411311	0.973042	-0.082007	0.0792271	0.998611	0.921266	1.08245	0.986851
finn-pQTL-s-R10-seq_6415_90	ukb-saige-153	Colorectal cancer || id:ukb-saige-153	CPN2	Wald ratio	1	-0.00157299	0.0410346	0.969422	-0.0820008	0.0788549	0.998428	0.921271	1.08205	0.986851
finn-pQTL-s-R10-seq_7735_17	ukb-saige-153	Colorectal cancer || id:ukb-saige-153	SERPINF1	Wald ratio	1	-0.00132334	0.0415906	0.974617	-0.0828409	0.0801942	0.998678	0.920498	1.0835	0.986851
finn-pQTL-s-R10-seq_9211_19	ukb-saige-153	Colorectal cancer || id:ukb-saige-153	SERPINF1	Wald ratio	1	-0.0013547	0.0425763	0.974617	-0.0848041	0.0820948	0.998646	0.918692	1.08556	0.986851
finn-pQTL-s-R10-seq_3303_23	ukb-saige-153	Colorectal cancer || id:ukb-saige-153	CST6	Wald ratio	1	-0.0018119	0.0731728	0.980245	-0.145231	0.141607	0.99819	0.864823	1.15212	0.988719
finn-pQTL-s-R10-seq_4471_50	ukb-saige-153	Colorectal cancer || id:ukb-saige-153	TGM3	Wald ratio	1	0.00139669	0.05208	0.978605	-0.10068	0.103473	1.0014	0.904222	1.10902	0.988719
finn-pQTL-s-R10-seq_4962_52	ukb-saige-153	Colorectal cancer || id:ukb-saige-153	CDNF	Wald ratio	1	0.0011988	0.0571734	0.983271	-0.110861	0.113259	1.0012	0.895063	1.11992	0.988719
finn-pQTL-s-R10-seq_6404_20	ukb-saige-153	Colorectal cancer || id:ukb-saige-153	C1QL1	Wald ratio	1	0.00166373	0.075624	0.982448	-0.146559	0.149887	1.00167	0.863675	1.1617	0.988719
finn-pQTL-s-R10-seq_9244_27	ukb-saige-153	Colorectal cancer || id:ukb-saige-153	PPT1	Wald ratio	1	0.00172551	0.0762099	0.981936	-0.147646	0.151097	1.00173	0.862737	1.16311	0.988719
finn-pQTL-s-R10-seq_3894_15	ukb-saige-153	Colorectal cancer || id:ukb-saige-153	NAGK	Wald ratio	1	-0.00075678	0.0527453	0.988552	-0.104138	0.102624	0.999244	0.901101	1.10807	0.991283
finn-pQTL-s-R10-seq_5095_21	ukb-saige-153	Colorectal cancer || id:ukb-saige-153	KIR2DL4	Wald ratio	1	-0.0011151	0.0743401	0.988032	-0.146822	0.144592	0.998886	0.863448	1.15557	0.991283
finn-pQTL-s-R10-seq_15476_6	ukb-saige-153	Colorectal cancer || id:ukb-saige-153	REG3G	Inverse variance weighted	2	-0.00221703	0.0490586	0.963955	-0.0983719	0.0939379	0.997785	0.906312	1.09849	0.993154
finn-pQTL-s-R10-seq_17331_138	ukb-saige-153	Colorectal cancer || id:ukb-saige-153	KREMEN1	Inverse variance weighted	2	-0.00294575	0.0486568	0.951725	-0.0983131	0.0924216	0.997059	0.906365	1.09683	0.993154
finn-pQTL-s-R10-seq_21227_18	ukb-saige-153	Colorectal cancer || id:ukb-saige-153	SULT1A1	Inverse variance weighted	2	-0.00119421	0.046586	0.979549	-0.0925027	0.0901143	0.998807	0.911647	1.0943	0.993154
finn-pQTL-s-R10-seq_21397_21	ukb-saige-153	Colorectal cancer || id:ukb-saige-153	PRTG	Inverse variance weighted	2	0.00375028	0.0576869	0.948165	-0.109316	0.116817	1.00376	0.896447	1.12391	0.993154
finn-pQTL-s-R10-seq_3168_8	ukb-saige-153	Colorectal cancer || id:ukb-saige-153	ADAMTS5	Inverse variance weighted	2	0.00151149	0.0352834	0.96583	-0.067644	0.070667	1.00151	0.934593	1.07322	0.993154
finn-pQTL-s-R10-seq_3666_17	ukb-saige-153	Colorectal cancer || id:ukb-saige-153	CFHR5	Inverse variance weighted	2	-0.00219928	0.0650195	0.973017	-0.129637	0.125239	0.997803	0.878414	1.13342	0.993154
finn-pQTL-s-R10-seq_6512_68	ukb-saige-153	Colorectal cancer || id:ukb-saige-153	KREMEN1	Inverse variance weighted	2	-0.00181829	0.0518401	0.97202	-0.103425	0.0997884	0.998183	0.901744	1.10494	0.993154
finn-pQTL-s-R10-seq_7885_17	ukb-saige-153	Colorectal cancer || id:ukb-saige-153	CFHR5	Inverse variance weighted	2	0.00331786	0.0359935	0.926556	-0.0672293	0.073865	1.00332	0.934981	1.07666	0.993154
finn-pQTL-s-R10-seq_8296_117	ukb-saige-153	Colorectal cancer || id:ukb-saige-153	POGLUT3	Inverse variance weighted	2	0.00149399	0.0385751	0.969106	-0.0741132	0.0771012	1.0015	0.928567	1.08015	0.993154
finn-pQTL-s-R10-seq_8644_46	ukb-saige-153	Colorectal cancer || id:ukb-saige-153	CTSH	Inverse variance weighted	2	-0.00200897	0.030907	0.948174	-0.0625867	0.0585688	0.997993	0.939332	1.06032	0.993154
finn-pQTL-s-R10-seq_9266_1	ukb-saige-153	Colorectal cancer || id:ukb-saige-153	TREM1	Inverse variance weighted	2	0.00208786	0.0387758	0.957059	-0.0739127	0.0780884	1.00209	0.928753	1.08122	0.993154
finn-pQTL-s-R10-seq_13408_23	ukb-saige-153	Colorectal cancer || id:ukb-saige-153	WFIKKN2	Wald ratio	1	-0.000301015	0.0384631	0.993756	-0.0756887	0.0750866	0.999699	0.927105	1.07798	0.995126
finn-pQTL-s-R10-seq_13731_14	ukb-saige-153	Colorectal cancer || id:ukb-saige-153	C7	Inverse variance weighted	2	-0.000150081	0.0644982	0.998143	-0.126567	0.126266	0.99985	0.881116	1.13458	0.998143
finn-pQTL-s-R10-seq_2630_12	ukb-saige-153	Colorectal cancer || id:ukb-saige-153	IL1RAP	Inverse variance weighted	2	-0.000335449	0.0562676	0.995243	-0.11062	0.109949	0.999665	0.895279	1.11622	0.998143
finn-pQTL-s-R10-seq_15363_32	ukb-saige-153	Colorectal cancer || id:ukb-saige-153	APOA5	Wald ratio	1	-7.93e-05	0.0396321	0.998404	-0.0777581	0.0775996	0.999921	0.925188	1.08069	0.998404

## Sheet: Iceland decode 4907 proteins
id.exposure	id.outcome	outcome	exposure	method	nsnp	b	se	pval	lo_ci	up_ci	or	or_lci95	or_uci95	p_fdr
6086_CHRDL2	ukb-saige-153	Colorectal cancer || id:ukb-saige-153	CHRDL2++CRDL2_NA_CRDL2	Inverse variance weighted	5	0.328242	0.0707449	3.49e-06	0.189582	0.466902	1.38853	1.20874	1.59505	0.00384324
6086_CHRDL2	ukb-saige-153	Colorectal cancer || id:ukb-saige-153	CHRDL2++CRDL2_NA_CRDL2	Weighted median	5	0.325499	0.0773083	2.55e-05	0.173975	0.477024	1.38472	1.19003	1.61127	0.0204953
10833_HHIP	ukb-saige-153	Colorectal cancer || id:ukb-saige-153	HHIP++HHIP_NA_HHIP	Inverse variance weighted	2	0.518271	0.143612	0.000307585	0.236791	0.79975	1.67912	1.26718	2.22498	0.112986
15686_INHBC	ukb-saige-153	Colorectal cancer || id:ukb-saige-153	INHBC++INHBC_NA_INHBC	Inverse variance weighted	8	-0.0811173	0.0221732	0.000253843	-0.124577	-0.0376578	0.922086	0.882871	0.963042	0.112986
12347_CCM2	ukb-saige-153	Colorectal cancer || id:ukb-saige-153	CCM2++CCM2_NA_CCM2	Wald ratio	1	-1.22085	0.356653	0.000619166	-1.91989	-0.521811	0.294979	0.146623	0.593445	0.193276
13973_TTL	ukb-saige-153	Colorectal cancer || id:ukb-saige-153	TTL++TTL_NA_TTL	Wald ratio	1	1.36986	0.410959	0.000858121	0.564384	2.17534	3.93481	1.75836	8.8052	0.193276
2890_CCL28	ukb-saige-153	Colorectal cancer || id:ukb-saige-153	CCL28++CCL28_NA_CCL28	Wald ratio	1	-1.25227	0.381125	0.00101724	-1.99927	-0.505263	0.285856	0.135434	0.603347	0.193276
11428_PDLIM1	ukb-saige-153	Colorectal cancer || id:ukb-saige-153	PDLIM1++PDLI1_NA_PDLI1	Wald ratio	1	-0.986343	0.311077	0.00152056	-1.59605	-0.376631	0.372938	0.202695	0.686169	0.216679
12569_CCT5	ukb-saige-153	Colorectal cancer || id:ukb-saige-153	CCT5++TCP_1_epsilon	Wald ratio	1	1.49448	0.487329	0.0021646	0.539311	2.44964	4.457	1.71483	11.5842	0.246765
4541_CDON	ukb-saige-153	Colorectal cancer || id:ukb-saige-153	CDON++CDON_NA_CDON	Weighted median	4	-0.194036	0.0573187	0.000711241	-0.306381	-0.0816911	0.823628	0.736106	0.921557	0.285919
15444_SERPINB4	ukb-saige-153	Colorectal cancer || id:ukb-saige-153	SERPINB4++SCCA2_NA_SCCA2	Inverse variance weighted	3	-0.6208	0.19384	0.00136171	-1.00073	-0.240874	0.537514	0.367612	0.78594	0.300122
4479_SERPING1	ukb-saige-153	Colorectal cancer || id:ukb-saige-153	SERPING1++C1_Esterase_Inhibitor	Inverse variance weighted	6	-0.166316	0.051286	0.00118314	-0.266837	-0.0657956	0.846779	0.765798	0.936322	0.300122
14623_SUMO3	ukb-saige-153	Colorectal cancer || id:ukb-saige-153	SUMO3++SUMO3_NA_SUMO3	Wald ratio	1	-1.09568	0.385802	0.00451135	-1.85185	-0.339506	0.334313	0.156946	0.712122	0.428579
17808_NIT2	ukb-saige-153	Colorectal cancer || id:ukb-saige-153	NIT2++NIT2_NA_NIT2	Wald ratio	1	1.04877	0.3828	0.00614904	0.298479	1.79906	2.85413	1.34781	6.04394	0.500708
16296_LGR5	ukb-saige-153	Colorectal cancer || id:ukb-saige-153	LGR5++LGR5_NA_LGR5	Wald ratio	1	-1.07296	0.407725	0.00849891	-1.8721	-0.27382	0.341994	0.1538	0.760469	0.538264
8469_IGFBP2	ukb-saige-153	Colorectal cancer || id:ukb-saige-153	IGFBP2++IGFBP_2	Wald ratio	1	1.16197	0.440141	0.0082906	0.299296	2.02465	3.19623	1.34891	7.57344	0.538264
17677_CD160	ukb-saige-153	Colorectal cancer || id:ukb-saige-153	CD160++BY55_NA_BY55	Wald ratio	1	0.43412	0.167555	0.00957228	0.105712	0.762529	1.5436	1.1115	2.14369	0.54562
15444_SERPINB4	ukb-saige-153	Colorectal cancer || id:ukb-saige-153	SERPINB4++SCCA2_NA_SCCA2	Weighted median	3	-0.633686	0.21198	0.00279559	-1.04917	-0.218205	0.530632	0.350229	0.803961	0.561913
15686_INHBC	ukb-saige-153	Colorectal cancer || id:ukb-saige-153	INHBC++INHBC_NA_INHBC	Weighted median	8	-0.0798057	0.0260083	0.00215158	-0.130782	-0.0288294	0.923296	0.877409	0.971582	0.561913
15589_GC	ukb-saige-153	Colorectal cancer || id:ukb-saige-153	GC++Gc_Globulin__Mixed_Type	Wald ratio	1	-0.442986	0.180476	0.0141063	-0.796719	-0.0892535	0.642116	0.450806	0.914614	0.578984
17781_MAP1LC3A	ukb-saige-153	Colorectal cancer || id:ukb-saige-153	MAP1LC3A++MLP3A_NA_MLP3A	Wald ratio	1	-1.00806	0.423387	0.0172679	-1.8379	-0.178226	0.364925	0.159151	0.836753	0.578984
18162_IRAK4	ukb-saige-153	Colorectal cancer || id:ukb-saige-153	IRAK4++IRAK4_NA_IRAK4	Wald ratio	1	0.717912	0.297317	0.015751	0.13517	1.30065	2.05015	1.14473	3.67169	0.578984
2982_LGALS4	ukb-saige-153	Colorectal cancer || id:ukb-saige-153	LGALS4++Galectin_4	Wald ratio	1	0.956848	0.393996	0.0151584	0.184615	1.72908	2.60348	1.20276	5.63547	0.578984
3807_FGF23	ukb-saige-153	Colorectal cancer || id:ukb-saige-153	FGF23++FGF23_NA_FGF23	Wald ratio	1	1.04651	0.426357	0.0141063	0.210853	1.88217	2.8477	1.23473	6.56774	0.578984
4922_CCL19	ukb-saige-153	Colorectal cancer || id:ukb-saige-153	CCL19++MIP_3b	Wald ratio	1	1.13872	0.47619	0.0167886	0.205383	2.07205	3.12276	1.228	7.94108	0.578984
9995_DUT	ukb-saige-153	Colorectal cancer || id:ukb-saige-153	DUT++DUT_NA_DUT	Wald ratio	1	0.900123	0.369914	0.0149605	0.175092	1.62515	2.45991	1.19136	5.0792	0.578984
4192_AKR1A1	ukb-saige-153	Colorectal cancer || id:ukb-saige-153	AKR1A1++AK1A1_NA_AK1A1	Weighted median	7	0.167966	0.058551	0.00412136	0.0532065	0.282726	1.1829	1.05465	1.32674	0.611282
4479_SERPING1	ukb-saige-153	Colorectal cancer || id:ukb-saige-153	SERPING1++C1_Esterase_Inhibitor	Weighted median	6	-0.15732	0.056189	0.00511291	-0.26745	-0.0471894	0.854431	0.765328	0.953907	0.611282
9484_DSG2	ukb-saige-153	Colorectal cancer || id:ukb-saige-153	DSG2++Desmoglein_2	Weighted median	5	0.286799	0.102911	0.00532211	0.0850934	0.488506	1.33216	1.08882	1.62988	0.611282
2837_MET	ukb-saige-153	Colorectal cancer || id:ukb-saige-153	MET++Met_NA_Met	Inverse variance weighted	3	-0.784797	0.268792	0.00350344	-1.31163	-0.257965	0.456212	0.269381	0.772622	0.643466
12633_PTPN9	ukb-saige-153	Colorectal cancer || id:ukb-saige-153	PTPN9++PTN9_NA_PTN9	Wald ratio	1	0.783476	0.34188	0.0219249	0.11339	1.45356	2.18907	1.12007	4.27832	0.657747
4125_AGER	ukb-saige-153	Colorectal cancer || id:ukb-saige-153	AGER++sRAGE_NA_sRAGE	Wald ratio	1	-0.362319	0.158103	0.0219249	-0.6722	-0.0524374	0.69606	0.510584	0.948914	0.657747
19578_DOK2	ukb-saige-153	Colorectal cancer || id:ukb-saige-153	DOK2++DOK2_NA_DOK2	Wald ratio	1	-1.3324	0.596073	0.025398	-2.5007	-0.164095	0.263844	0.0820275	0.848661	0.664003
2421_BDNF	ukb-saige-153	Colorectal cancer || id:ukb-saige-153	BDNF++BDNF_NA_BDNF	Wald ratio	1	-0.927357	0.425039	0.029123	-1.76043	-0.0942813	0.395598	0.17197	0.910027	0.664003
3316_SERPIND1	ukb-saige-153	Colorectal cancer || id:ukb-saige-153	SERPIND1++Heparin_cofactor_II	Wald ratio	1	-0.931122	0.420918	0.0269583	-1.75612	-0.106122	0.394111	0.172713	0.899315	0.664003
3474_THBS1	ukb-saige-153	Colorectal cancer || id:ukb-saige-153	THBS1++Thrombospondin_1	Wald ratio	1	1.02007	0.451505	0.0238673	0.135117	1.90502	2.77338	1.14467	6.71952	0.664003
3825_MAPK8	ukb-saige-153	Colorectal cancer || id:ukb-saige-153	MAPK8++MK08_NA_MK08	Wald ratio	1	0.852575	0.390764	0.029123	0.0866785	1.61847	2.34568	1.09055	5.04538	0.664003
6969_WFDC5	ukb-saige-153	Colorectal cancer || id:ukb-saige-153	WFDC5++WFDC5_NA_WFDC5	Wald ratio	1	0.905983	0.410256	0.027221	0.10188	1.71009	2.47436	1.10725	5.52943	0.664003
5355_TNFSF14	ukb-saige-153	Colorectal cancer || id:ukb-saige-153	TNFSF14++LIGHT_NA_LIGHT	Wald ratio	1	-0.384836	0.178059	0.0306729	-0.733831	-0.0358415	0.680562	0.480066	0.964793	0.672445
7050_NEGR1	ukb-saige-153	Colorectal cancer || id:ukb-saige-153	NEGR1++NEGR1_NA_NEGR1	Wald ratio	1	-0.370066	0.172697	0.0321246	-0.708553	-0.0315789	0.690689	0.492356	0.968914	0.678185
14205_HEXIM2	ukb-saige-153	Colorectal cancer || id:ukb-saige-153	HEXIM2++HEXI2_NA_HEXI2	Wald ratio	1	-0.562293	0.264609	0.0335866	-1.08093	-0.0436604	0.569901	0.339281	0.957279	0.683268
17712_IDI1	ukb-saige-153	Colorectal cancer || id:ukb-saige-153	IDI1++IDI1_NA_IDI1	Wald ratio	1	-0.715631	0.338983	0.0347628	-1.38004	-0.0512241	0.488884	0.251569	0.950066	0.683268
10903_STX8	ukb-saige-153	Colorectal cancer || id:ukb-saige-153	STX8++STX8_NA_STX8	Wald ratio	1	0.748899	0.367107	0.0413503	0.0293686	1.46843	2.11467	1.0298	4.34241	0.693226
15529_CSRP1	ukb-saige-153	Colorectal cancer || id:ukb-saige-153	CSRP1++Cysteine_rich_protein_1	Wald ratio	1	0.480167	0.229645	0.0365362	0.0300626	0.930271	1.61634	1.03052	2.5352	0.693226
15596_HEXIM1	ukb-saige-153	Colorectal cancer || id:ukb-saige-153	HEXIM1++HEXI1_NA_HEXI1	Wald ratio	1	-0.537143	0.262857	0.0410051	-1.05234	-0.0219429	0.584416	0.349119	0.978296	0.693226
18386_GLRX	ukb-saige-153	Colorectal cancer || id:ukb-saige-153	GLRX++GLRX1_NA_GLRX1	Wald ratio	1	-0.60355	0.295858	0.0413503	-1.18343	-0.0236686	0.546867	0.306226	0.976609	0.693226
4254_NUDCD3	ukb-saige-153	Colorectal cancer || id:ukb-saige-153	NUDCD3++NUDC3_NA_NUDC3	Wald ratio	1	0.668414	0.327654	0.0413503	0.0262123	1.31062	1.95114	1.02656	3.70846	0.693226
2644_PRKCA	ukb-saige-153	Colorectal cancer || id:ukb-saige-153	PRKCA++PKC_A	Wald ratio	1	-0.890688	0.445344	0.0455003	-1.76356	-0.0178138	0.410373	0.171433	0.982344	0.720421
4563_PLCG1	ukb-saige-153	Colorectal cancer || id:ukb-saige-153	PLCG1++PLCG1_NA_PLCG1	Wald ratio	1	0.627803	0.313901	0.0455003	0.0125561	1.24305	1.87349	1.01264	3.46617	0.720421
12408_RAB22A	ukb-saige-153	Colorectal cancer || id:ukb-saige-153	RAB22A++RB22A_NA_RB22A	Wald ratio	1	0.694444	0.354938	0.0504037	-0.00123457	1.39012	2.0026	0.998766	4.01535	0.740076
17724_WWOX	ukb-saige-153	Colorectal cancer || id:ukb-saige-153	WWOX++WWOX_NA_WWOX	Wald ratio	1	0.618705	0.316547	0.0506367	-0.00172662	1.23914	1.85652	0.998275	3.45263	0.740076
2836_LCN2	ukb-saige-153	Colorectal cancer || id:ukb-saige-153	LCN2++Lipocalin_2	Wald ratio	1	0.635951	0.324465	0.0499958	0	1.2719	1.88882	1	3.56763	0.740076
3447_CXCL8	ukb-saige-153	Colorectal cancer || id:ukb-saige-153	CXCL8++IL_8	Wald ratio	1	0.852878	0.440654	0.0529309	-0.0108031	1.71656	2.34639	0.989255	5.56535	0.754266
11543_LIMA1	ukb-saige-153	Colorectal cancer || id:ukb-saige-153	LIMA1++LIMA1_NA_LIMA1	Wald ratio	1	0.705882	0.369748	0.0562504	-0.0188235	1.43059	2.02563	0.981353	4.18116	0.782017
6448_SEMA3C	ukb-saige-153	Colorectal cancer || id:ukb-saige-153	SEMA3C++Sema_E	Wald ratio	1	-0.381395	0.204651	0.0623728	-0.782512	0.0197209	0.682908	0.457256	1.01992	0.846488
8323_TFF3	ukb-saige-153	Colorectal cancer || id:ukb-saige-153	TFF3++TFF3_NA_TFF3	Wald ratio	1	0.601504	0.325815	0.0648699	-0.0370927	1.2401	1.82486	0.963587	3.45596	0.859903
15368_BMPER	ukb-saige-153	Colorectal cancer || id:ukb-saige-153	BMPER++BMPER_NA_BMPER	Inverse variance weighted	2	0.511515	0.189763	0.00702735	0.139579	0.883451	1.66782	1.14979	2.41923	0.86046
4192_AKR1A1	ukb-saige-153	Colorectal cancer || id:ukb-saige-153	AKR1A1++AK1A1_NA_AK1A1	Inverse variance weighted	7	0.175945	0.0648004	0.00662403	0.0489358	0.302953	1.19237	1.05015	1.35385	0.86046
5111_NRXN3	ukb-saige-153	Colorectal cancer || id:ukb-saige-153	NRXN3++NRX3B_NA_NRX3B	Inverse variance weighted	4	-0.275854	0.100218	0.00591334	-0.472281	-0.0794275	0.758923	0.623578	0.923645	0.86046
16818_CDCP1	ukb-saige-153	Colorectal cancer || id:ukb-saige-153	CDCP1++CDCP1_NA_CDCP1	Inverse variance weighted	4	-0.22486	0.0845634	0.00783561	-0.390605	-0.059116	0.798628	0.676648	0.942597	0.863484
16818_CDCP1	ukb-saige-153	Colorectal cancer || id:ukb-saige-153	CDCP1++CDCP1_NA_CDCP1	Weighted median	4	-0.233909	0.0920244	0.0110278	-0.414277	-0.0535414	0.791434	0.660818	0.947867	0.886634
2992_IL17RA	ukb-saige-153	Colorectal cancer || id:ukb-saige-153	IL17RA++IL_17_sR	Weighted median	7	0.0996501	0.039158	0.0109334	0.0229004	0.1764	1.10478	1.02316	1.19291	0.886634
5636_MFAP4	ukb-saige-153	Colorectal cancer || id:ukb-saige-153	MFAP4++MFAP4_NA_MFAP4	Weighted median	3	-0.273215	0.106439	0.0102618	-0.481835	-0.0645956	0.760929	0.617649	0.937447	0.886634
9869_NFKB1	ukb-saige-153	Colorectal cancer || id:ukb-saige-153	NFKB1++NF_kappa_B_p105	Wald ratio	1	0.608828	0.334855	0.0690363	-0.0474886	1.26514	1.83828	0.953621	3.54361	0.894335
10816_PILRA	ukb-saige-153	Colorectal cancer || id:ukb-saige-153	PILRA++PILRA_isoform_FDF03_M14	Weighted median	6	-0.120057	0.050748	0.0179938	-0.219523	-0.0205907	0.88687	0.802902	0.97962	0.903836
11117_SPATA20	ukb-saige-153	Colorectal cancer || id:ukb-saige-153	SPATA20++SPT20_NA_SPT20	Weighted median	4	-0.160173	0.0673806	0.0174477	-0.292239	-0.0281069	0.851996	0.74659	0.972284	0.903836
13119_SERPINA10	ukb-saige-153	Colorectal cancer || id:ukb-saige-153	SERPINA10++protein_Z_inhibitor	Weighted median	7	-0.128197	0.0547065	0.019111	-0.235422	-0.0209722	0.87968	0.790238	0.979246	0.903836
16872_GSTZ1	ukb-saige-153	Colorectal cancer || id:ukb-saige-153	GSTZ1++MAAI_NA_MAAI	Weighted median	8	-0.09237	0.0389303	0.0176585	-0.168673	-0.0160666	0.911768	0.844785	0.984062	0.903836
2837_MET	ukb-saige-153	Colorectal cancer || id:ukb-saige-153	MET++Met_NA_Met	Weighted median	3	-0.746516	0.305322	0.0144847	-1.34495	-0.148085	0.474015	0.260554	0.862358	0.903836
3324_LY9	ukb-saige-153	Colorectal cancer || id:ukb-saige-153	LY9++LY9_NA_LY9	Weighted median	6	-0.121597	0.0518728	0.0190711	-0.223268	-0.0199264	0.885505	0.799901	0.980271	0.903836
6402_PILRA	ukb-saige-153	Colorectal cancer || id:ukb-saige-153	PILRA++PILRA_isoform_FDF03_deltaTM	Weighted median	6	-0.116934	0.0487396	0.0164329	-0.212464	-0.0214043	0.889644	0.80859	0.978823	0.903836
10015_KCNAB2	ukb-saige-153	Colorectal cancer || id:ukb-saige-153	KCNAB2++KCAB2_NA_KCAB2	Wald ratio	1	0.525	0.3125	0.0929573	-0.0875	1.1375	1.69046	0.916219	3.11896	0.905755
10424_NPDC1	ukb-saige-153	Colorectal cancer || id:ukb-saige-153	NPDC1++NPDC1_NA_NPDC1	Wald ratio	1	-0.523385	0.389755	0.179318	-1.28731	0.240535	0.592511	0.276014	1.27193	0.905755
10490_RPN1	ukb-saige-153	Colorectal cancer || id:ukb-saige-153	RPN1++RPN1_NA_RPN1	Wald ratio	1	0.199468	0.146277	0.172682	-0.087234	0.48617	1.22075	0.916463	1.62608	0.905755
10521_MXRA8	ukb-saige-153	Colorectal cancer || id:ukb-saige-153	MXRA8++MXRA8_NA_MXRA8	Wald ratio	1	-0.405915	0.229052	0.0763693	-0.854856	0.043027	0.666367	0.425344	1.04397	0.905755
10835_A4GNT	ukb-saige-153	Colorectal cancer || id:ukb-saige-153	A4GNT++A4GCT_NA_A4GCT	Wald ratio	1	0.522273	0.353303	0.139338	-0.1702	1.21475	1.68586	0.843496	3.36944	0.905755
11214_DNAJB9	ukb-saige-153	Colorectal cancer || id:ukb-saige-153	DNAJB9++DNJB9_NA_DNJB9	Wald ratio	1	-0.624442	0.44603	0.161513	-1.49866	0.249777	0.53556	0.223429	1.28374	0.905755
11277_ATF6	ukb-saige-153	Colorectal cancer || id:ukb-saige-153	ATF6++ATF6A_NA_ATF6A	Wald ratio	1	-0.628803	0.446247	0.158808	-1.50345	0.245842	0.53323	0.222362	1.2787	0.905755
11516_FABP1	ukb-saige-153	Colorectal cancer || id:ukb-saige-153	FABP1++FABPL_NA_FABPL	Wald ratio	1	0.292237	0.210046	0.164133	-0.119452	0.703927	1.33942	0.887407	2.02168	0.905755
11530_HMBS	ukb-saige-153	Colorectal cancer || id:ukb-saige-153	HMBS++HEM3_NA_HEM3	Wald ratio	1	-0.598802	0.419162	0.153127	-1.42036	0.222754	0.549469	0.241627	1.24951	0.905755
11547_MUSK	ukb-saige-153	Colorectal cancer || id:ukb-saige-153	MUSK++MUSK_NA_MUSK	Wald ratio	1	-0.504587	0.336391	0.133614	-1.16391	0.15474	0.603755	0.312261	1.16735	0.905755
12016_CBL	ukb-saige-153	Colorectal cancer || id:ukb-saige-153	CBL++CBL_NA_CBL	Wald ratio	1	0.247836	0.16129	0.124395	-0.0682927	0.563965	1.28125	0.933987	1.75763	0.905755
12469_MAPRE1	ukb-saige-153	Colorectal cancer || id:ukb-saige-153	MAPRE1++MARE1_NA_MARE1	Wald ratio	1	0.493274	0.343797	0.151349	-0.180568	1.16712	1.63767	0.834796	3.21271	0.905755
12656_KLC1	ukb-saige-153	Colorectal cancer || id:ukb-saige-153	KLC1++KLC1_NA_KLC1	Wald ratio	1	0.406321	0.259594	0.117532	-0.102483	0.915124	1.50128	0.902593	2.49709	0.905755
13133_LTBP4	ukb-saige-153	Colorectal cancer || id:ukb-saige-153	LTBP4++LTBP4_NA_LTBP4	Wald ratio	1	-0.510004	0.368772	0.166671	-1.2328	0.212789	0.600493	0.291476	1.23712	0.905755
13384_FH	ukb-saige-153	Colorectal cancer || id:ukb-saige-153	FH++FUMH_NA_FUMH	Wald ratio	1	0.257278	0.162492	0.113346	-0.0612051	0.575762	1.2934	0.94063	1.77848	0.905755
13590_REXO2	ukb-saige-153	Colorectal cancer || id:ukb-saige-153	REXO2++ORN_NA_ORN	Wald ratio	1	-0.283688	0.186976	0.129206	-0.650161	0.0827853	0.753002	0.521962	1.08631	0.905755
13738_INHBA	ukb-saige-153	Colorectal cancer || id:ukb-saige-153	INHBA++Inhibin_bA_chain	Wald ratio	1	0.391534	0.26455	0.138873	-0.126984	0.910053	1.47925	0.880748	2.48445	0.905755
14112_RELT	ukb-saige-153	Colorectal cancer || id:ukb-saige-153	RELT++RELT_NA_RELT	Wald ratio	1	0.581395	0.431894	0.178253	-0.265116	1.42791	1.78853	0.767117	4.16996	0.905755
14688_PTPN7	ukb-saige-153	Colorectal cancer || id:ukb-saige-153	PTPN7++PTN7_NA_PTN7	Wald ratio	1	0.734072	0.498615	0.140961	-0.243213	1.71136	2.08355	0.784104	5.53647	0.905755
15339_CFL2	ukb-saige-153	Colorectal cancer || id:ukb-saige-153	CFL2++COF2_NA_COF2	Wald ratio	1	-0.325098	0.195059	0.0955807	-0.707412	0.0572172	0.722457	0.492918	1.05889	0.905755
15539_SLITRK1	ukb-saige-153	Colorectal cancer || id:ukb-saige-153	SLITRK1++SLIK1_NA_SLIK1	Wald ratio	1	0.560292	0.353228	0.112692	-0.132034	1.25262	1.75118	0.876311	3.4995	0.905755
16758_HDGF	ukb-saige-153	Colorectal cancer || id:ukb-saige-153	HDGF++HDGF_NA_HDGF	Wald ratio	1	0.437086	0.291391	0.133614	-0.13404	1.00821	1.54819	0.874555	2.7407	0.905755
17739_HADH	ukb-saige-153	Colorectal cancer || id:ukb-saige-153	HADH++HCDH_NA_HCDH	Wald ratio	1	-0.465616	0.32235	0.148614	-1.09742	0.166189	0.627748	0.333731	1.1808	0.905755
18243_CMPK1	ukb-saige-153	Colorectal cancer || id:ukb-saige-153	CMPK1++Cytidylate_kinase	Wald ratio	1	-0.395683	0.293765	0.178	-0.971463	0.180096	0.67322	0.378529	1.19733	0.905755
18413_ARL4D	ukb-saige-153	Colorectal cancer || id:ukb-saige-153	ARL4D++ARL4D_NA_ARL4D	Wald ratio	1	-0.701107	0.424354	0.0984991	-1.53284	0.130627	0.496036	0.215921	1.13954	0.905755
19207_ADK	ukb-saige-153	Colorectal cancer || id:ukb-saige-153	ADK++ADK_NA_ADK	Wald ratio	1	0.623886	0.427807	0.144749	-0.214617	1.46239	1.86617	0.806851	4.31626	0.905755
19262_ACADVL	ukb-saige-153	Colorectal cancer || id:ukb-saige-153	ACADVL++ACADV_NA_ACADV	Wald ratio	1	0.788382	0.456432	0.0841187	-0.106224	1.68299	2.19983	0.899223	5.38161	0.905755
19338_LZIC	ukb-saige-153	Colorectal cancer || id:ukb-saige-153	LZIC++LZIC_NA_LZIC	Wald ratio	1	0.712589	0.43943	0.104884	-0.148694	1.57387	2.03926	0.861833	4.82529	0.905755
19560_PLXNA4	ukb-saige-153	Colorectal cancer || id:ukb-saige-153	PLXNA4++PLXA4_NA_PLXA4	Wald ratio	1	-0.351053	0.260782	0.178253	-0.862187	0.16008	0.703946	0.422238	1.17361	0.905755
19622_INHBA	ukb-saige-153	Colorectal cancer || id:ukb-saige-153	INHBA++Activin_A	Wald ratio	1	0.394877	0.266809	0.138873	-0.128068	0.917823	1.4842	0.879793	2.50383	0.905755
2631_IL10RB	ukb-saige-153	Colorectal cancer || id:ukb-saige-153	IL10RB++IL_10_Rb	Wald ratio	1	0.439716	0.312057	0.158808	-0.171915	1.05135	1.55227	0.842051	2.8615	0.905755
2635_LAYN	ukb-saige-153	Colorectal cancer || id:ukb-saige-153	LAYN++Layilin_NA_Layilin	Wald ratio	1	-0.726577	0.42065	0.0841187	-1.55105	0.0978968	0.483561	0.212025	1.10285	0.905755
2683_C3	ukb-saige-153	Colorectal cancer || id:ukb-saige-153	C3++iC3b_NA_iC3b	Wald ratio	1	0.516206	0.372149	0.165412	-0.213205	1.24562	1.67566	0.80799	3.47508	0.905755
2754_C3	ukb-saige-153	Colorectal cancer || id:ukb-saige-153	C3++C3_NA_C3	Wald ratio	1	0.436992	0.315041	0.165412	-0.180488	1.05447	1.54804	0.834863	2.87046	0.905755
2797_APOB	ukb-saige-153	Colorectal cancer || id:ukb-saige-153	APOB++Apo_B	Wald ratio	1	0.469108	0.320366	0.143116	-0.15881	1.09703	1.59857	0.853158	2.99524	0.905755
2827_CX3CL1	ukb-saige-153	Colorectal cancer || id:ukb-saige-153	CX3CL1++Fractalkine_CX3CL_1	Wald ratio	1	-0.234709	0.165677	0.15658	-0.559437	0.0900179	0.790801	0.571531	1.09419	0.905755
2860_KPNA2	ukb-saige-153	Colorectal cancer || id:ukb-saige-153	KPNA2++Karyopherin_a2	Wald ratio	1	-0.561404	0.394737	0.154962	-1.33509	0.212281	0.570408	0.263135	1.23649	0.905755
2864_MAP2K1	ukb-saige-153	Colorectal cancer || id:ukb-saige-153	MAP2K1++MEK1_NA_MEK1	Wald ratio	1	0.552585	0.365419	0.130484	-0.163636	1.26881	1.73774	0.849051	3.5566	0.905755
3305_DLL4	ukb-saige-153	Colorectal cancer || id:ukb-saige-153	DLL4++DLL4_NA_DLL4	Wald ratio	1	0.604064	0.433828	0.1638	-0.246238	1.45437	1.82954	0.781736	4.28177	0.905755
3391_PIK3CG	ukb-saige-153	Colorectal cancer || id:ukb-saige-153	PIK3CG++PK3CG_NA_PK3CG	Wald ratio	1	-0.681818	0.433884	0.116083	-1.53223	0.168595	0.505697	0.216053	1.18364	0.905755
3806_EPHA5	ukb-saige-153	Colorectal cancer || id:ukb-saige-153	EPHA5++EphA5_NA_EphA5	Wald ratio	1	-0.278841	0.207764	0.179562	-0.686058	0.128376	0.75666	0.503557	1.13698	0.905755
3848_GAPDH	ukb-saige-153	Colorectal cancer || id:ukb-saige-153	GAPDH++GAPDH__liver	Wald ratio	1	-0.545229	0.39653	0.169131	-1.32243	0.23197	0.579709	0.266487	1.26108	0.905755
4145_NTF3	ukb-saige-153	Colorectal cancer || id:ukb-saige-153	NTF3++Neurotrophin_3	Wald ratio	1	0.568862	0.359281	0.113346	-0.135329	1.27305	1.76626	0.873428	3.57174	0.905755
4309_TPI1	ukb-saige-153	Colorectal cancer || id:ukb-saige-153	TPI1++Triosephosphate_isomerase	Wald ratio	1	0.688337	0.458891	0.133614	-0.21109	1.58776	1.9904	0.809701	4.89279	0.905755
4900_C3	ukb-saige-153	Colorectal cancer || id:ukb-saige-153	C3++C3a_NA_C3a	Wald ratio	1	0.518697	0.373945	0.165412	-0.214234	1.25163	1.67984	0.807159	3.49603	0.905755
4960_ANXA1	ukb-saige-153	Colorectal cancer || id:ukb-saige-153	ANXA1++annexin_I	Wald ratio	1	0.288005	0.16924	0.0888014	-0.0437055	0.619715	1.33376	0.957236	1.8584	0.905755
5061_ICOSLG	ukb-saige-153	Colorectal cancer || id:ukb-saige-153	ICOSLG++B7_H2	Wald ratio	1	-0.438596	0.300752	0.144749	-1.02807	0.150877	0.644941	0.357697	1.16285	0.905755
5196_NMT1	ukb-saige-153	Colorectal cancer || id:ukb-saige-153	NMT1++NMT1_NA_NMT1	Wald ratio	1	-0.780911	0.477223	0.101764	-1.71627	0.154447	0.457989	0.179735	1.16701	0.905755
5275_VAV1	ukb-saige-153	Colorectal cancer || id:ukb-saige-153	VAV1++VAV_NA_VAV	Wald ratio	1	-0.47195	0.347284	0.174155	-1.15263	0.208727	0.623785	0.315806	1.23211	0.905755
5598_GREM2	ukb-saige-153	Colorectal cancer || id:ukb-saige-153	GREM2++GREM2_NA_GREM2	Wald ratio	1	0.541838	0.356653	0.128704	-0.157202	1.24088	1.71916	0.854532	3.45865	0.905755
5918_PSME1	ukb-saige-153	Colorectal cancer || id:ukb-saige-153	PSME1++PSME1_NA_PSME1	Wald ratio	1	-0.726351	0.422297	0.0854324	-1.55405	0.101351	0.483671	0.211389	1.10667	0.905755
6151_MAP2K3	ukb-saige-153	Colorectal cancer || id:ukb-saige-153	MAP2K3++MP2K3_NA_MP2K3	Wald ratio	1	0.745342	0.47619	0.117532	-0.187992	1.67867	2.10716	0.828622	5.35845	0.905755
6408_INHBC	ukb-saige-153	Colorectal cancer || id:ukb-saige-153	INHBC++INHBC_NA_INHBC	Wald ratio	1	0.405405	0.23166	0.0801183	-0.0486486	0.859459	1.49991	0.952516	2.36188	0.905755
6493_CPZ	ukb-saige-153	Colorectal cancer || id:ukb-saige-153	CPZ++CBPZ_NA_CBPZ	Wald ratio	1	0.491071	0.3125	0.116083	-0.121429	1.10357	1.63407	0.885654	3.01491	0.905755
6899_PCBD2	ukb-saige-153	Colorectal cancer || id:ukb-saige-153	PCBD2++PHS2_NA_PHS2	Wald ratio	1	-0.651466	0.470503	0.16617	-1.57365	0.27072	0.521281	0.207287	1.31091	0.905755
6909_MGAT2	ukb-saige-153	Colorectal cancer || id:ukb-saige-153	MGAT2++MGAT2_NA_MGAT2	Wald ratio	1	-0.229008	0.160305	0.153127	-0.543206	0.0851908	0.795322	0.580883	1.08892	0.905755
8035_C1orf198	ukb-saige-153	Colorectal cancer || id:ukb-saige-153	C1orf198++CA198_NA_CA198	Wald ratio	1	0.340751	0.201669	0.0910939	-0.0545202	0.736022	1.406	0.946939	2.08761	0.905755
8065_PATE4	ukb-saige-153	Colorectal cancer || id:ukb-saige-153	PATE4++PATE4_NA_PATE4	Wald ratio	1	-0.259843	0.188976	0.169131	-0.630236	0.110551	0.771173	0.532466	1.11689	0.905755
8080_MSMP	ukb-saige-153	Colorectal cancer || id:ukb-saige-153	MSMP++PSMP_NA_PSMP	Wald ratio	1	-0.544872	0.352564	0.122236	-1.2359	0.146154	0.579916	0.290574	1.15737	0.905755
8100_ADM2	ukb-saige-153	Colorectal cancer || id:ukb-saige-153	ADM2++ADM2_NA_ADM2	Wald ratio	1	0.342282	0.214765	0.110992	-0.0786577	0.763221	1.40816	0.924356	2.14518	0.905755
8231_FLT1	ukb-saige-153	Colorectal cancer || id:ukb-saige-153	FLT1++VEGF_sR1	Wald ratio	1	0.695652	0.449275	0.121529	-0.184928	1.57623	2.00502	0.831165	4.8367	0.905755
8243_SPINK1	ukb-saige-153	Colorectal cancer || id:ukb-saige-153	SPINK1++TATI_NA_TATI	Wald ratio	1	0.291262	0.194175	0.133614	-0.0893204	0.671845	1.33812	0.914553	1.95785	0.905755
8953_HDGF	ukb-saige-153	Colorectal cancer || id:ukb-saige-153	HDGF++HDGF_NA_HDGF	Wald ratio	1	0.441767	0.294511	0.133614	-0.135475	1.01901	1.55545	0.873301	2.77045	0.905755
8956_SCARF2	ukb-saige-153	Colorectal cancer || id:ukb-saige-153	SCARF2++SREC_II	Wald ratio	1	-0.302057	0.173522	0.081729	-0.642159	0.0380463	0.739296	0.526155	1.03878	0.905755
8957_ERLEC1	ukb-saige-153	Colorectal cancer || id:ukb-saige-153	ERLEC1++XTP3B_NA_XTP3B	Wald ratio	1	0.398804	0.279163	0.153127	-0.148355	0.945962	1.49004	0.862125	2.57529	0.905755
9719_MMP16	ukb-saige-153	Colorectal cancer || id:ukb-saige-153	MMP16++MMP_16	Wald ratio	1	0.55794	0.343348	0.104163	-0.115021	1.2309	1.74707	0.891347	3.42431	0.905755
9772_NLGN2	ukb-saige-153	Colorectal cancer || id:ukb-saige-153	NLGN2++NLGN2_NA_NLGN2	Wald ratio	1	-0.530387	0.375691	0.158019	-1.26674	0.205967	0.588377	0.281749	1.22871	0.905755
9886_XRCC4	ukb-saige-153	Colorectal cancer || id:ukb-saige-153	XRCC4++XRCC4_NA_XRCC4	Wald ratio	1	-0.357607	0.221066	0.105739	-0.790897	0.0756827	0.699348	0.453438	1.07862	0.905755
9894_MYO6	ukb-saige-153	Colorectal cancer || id:ukb-saige-153	MYO6++MYO6_NA_MYO6	Wald ratio	1	0.651466	0.390879	0.0955807	-0.114658	1.41759	1.91835	0.891671	4.12716	0.905755
12646_RPE	ukb-saige-153	Colorectal cancer || id:ukb-saige-153	RPE++RPE_NA_RPE	Wald ratio	1	0.369881	0.277411	0.182422	-0.173844	0.913606	1.44756	0.840428	2.4933	0.912112
10464_ANTXR1	ukb-saige-153	Colorectal cancer || id:ukb-saige-153	ANTXR1++ANTR1_NA_ANTR1	Wald ratio	1	-0.611814	0.464135	0.187443	-1.52152	0.29789	0.542366	0.21838	1.34701	0.921055
7551_LRRC32	ukb-saige-153	Colorectal cancer || id:ukb-saige-153	LRRC32++LRC32_NA_LRC32	Wald ratio	1	-0.47619	0.36075	0.186835	-1.18326	0.23088	0.621145	0.306278	1.25971	0.921055
15622_OPCML	ukb-saige-153	Colorectal cancer || id:ukb-saige-153	OPCML++OBCAM_NA_OBCAM	Weighted median	3	-0.417663	0.185188	0.0241114	-0.780631	-0.0546952	0.658584	0.458117	0.946774	0.927638
2637_MRC1	ukb-saige-153	Colorectal cancer || id:ukb-saige-153	MRC1++Macrophage_mannose_receptor	Weighted median	5	-0.394539	0.173928	0.0233046	-0.735438	-0.0536399	0.673991	0.479296	0.947773	0.927638
6920_GFRAL	ukb-saige-153	Colorectal cancer || id:ukb-saige-153	GFRAL++GFRAL_NA_GFRAL	Weighted median	3	-0.295593	0.131172	0.0242294	-0.55269	-0.0384954	0.74409	0.5754	0.962236	0.927638
9580_LAMC2	ukb-saige-153	Colorectal cancer || id:ukb-saige-153	LAMC2++Laminin_gamma_2	Weighted median	4	-0.151257	0.0664633	0.0228577	-0.281525	-0.0209894	0.859626	0.754632	0.979229	0.927638
12637_CRAT	ukb-saige-153	Colorectal cancer || id:ukb-saige-153	CRAT++CACP_NA_CACP	Wald ratio	1	-0.3433	0.265781	0.196473	-0.86423	0.17763	0.709425	0.421376	1.19438	0.933245
2611_TYRO3	ukb-saige-153	Colorectal cancer || id:ukb-saige-153	TYRO3++Dtk_NA_Dtk	Wald ratio	1	-0.288641	0.223464	0.196473	-0.726629	0.149348	0.749281	0.483536	1.16108	0.933245
5076_EPHA10	ukb-saige-153	Colorectal cancer || id:ukb-saige-153	EPHA10++EPHAA_NA_EPHAA	Wald ratio	1	0.397436	0.307692	0.196473	-0.205641	1.00051	1.488	0.814125	2.71968	0.933245
8768_BCL10	ukb-saige-153	Colorectal cancer || id:ukb-saige-153	BCL10++Bcl_10	Wald ratio	1	-0.53286	0.408526	0.192115	-1.33357	0.267851	0.586924	0.263535	1.30715	0.933245
10974_SPINK7	ukb-saige-153	Colorectal cancer || id:ukb-saige-153	SPINK7++ISK7_NA_ISK7	Wald ratio	1	-0.226929	0.181543	0.2113	-0.582753	0.128896	0.796977	0.558359	1.13757	0.933649
11134_MTRF1L	ukb-saige-153	Colorectal cancer || id:ukb-saige-153	MTRF1L++RF1ML_NA_RF1ML	Wald ratio	1	-0.175801	0.139607	0.207937	-0.449431	0.0978283	0.838785	0.637991	1.10277	0.933649
11388_WFDC2	ukb-saige-153	Colorectal cancer || id:ukb-saige-153	WFDC2++HE4_NA_HE4	Wald ratio	1	0.45709	0.363806	0.208967	-0.25597	1.17015	1.57947	0.774165	3.22247	0.933649
13107_LYPD3	ukb-saige-153	Colorectal cancer || id:ukb-saige-153	LYPD3++LYPD3_NA_LYPD3	Wald ratio	1	-0.2477	0.19816	0.2113	-0.636093	0.140694	0.780594	0.529356	1.15107	0.933649
13481_TCEA2	ukb-saige-153	Colorectal cancer || id:ukb-saige-153	TCEA2++TCEA2_NA_TCEA2	Wald ratio	1	0.199587	0.158293	0.207356	-0.110668	0.509842	1.2209	0.895236	1.66503	0.933649
2972_BMP7	ukb-saige-153	Colorectal cancer || id:ukb-saige-153	BMP7++BMP_7	Wald ratio	1	0.509554	0.398089	0.200545	-0.270701	1.28981	1.66455	0.762845	3.63209	0.933649
3050_VWF	ukb-saige-153	Colorectal cancer || id:ukb-saige-153	VWF++vWF_NA_vWF	Wald ratio	1	-0.254777	0.200182	0.203115	-0.647134	0.13758	0.775089	0.523544	1.14749	0.933649
5687_PRKCSH	ukb-saige-153	Colorectal cancer || id:ukb-saige-153	PRKCSH++GLU2B_NA_GLU2B	Wald ratio	1	-0.282686	0.220848	0.200545	-0.715548	0.150177	0.753757	0.488924	1.16204	0.933649
6955_SNX1	ukb-saige-153	Colorectal cancer || id:ukb-saige-153	SNX1++SNX1_NA_SNX1	Wald ratio	1	0.227116	0.181234	0.210146	-0.128103	0.582335	1.25498	0.879763	1.79021	0.933649
15487_CES1	ukb-saige-153	Colorectal cancer || id:ukb-saige-153	CES1++carboxylesterase__liver	Wald ratio	1	0.62724	0.510753	0.219421	-0.373835	1.62832	1.87244	0.68809	5.09528	0.93463
17151_IRF3	ukb-saige-153	Colorectal cancer || id:ukb-saige-153	IRF3++IRF_3	Wald ratio	1	0.377622	0.307692	0.21972	-0.225455	0.980699	1.45881	0.798153	2.66632	0.93463
18337_GMDS	ukb-saige-153	Colorectal cancer || id:ukb-saige-153	GMDS++GMDS_NA_GMDS	Wald ratio	1	0.511551	0.412541	0.214975	-0.29703	1.32013	1.66788	0.743022	3.74392	0.93463
2681_HGF	ukb-saige-153	Colorectal cancer || id:ukb-saige-153	HGF++HGF_NA_HGF	Wald ratio	1	-0.246032	0.198413	0.214975	-0.634921	0.142857	0.781897	0.529978	1.15356	0.93463
9241_SIRPG	ukb-saige-153	Colorectal cancer || id:ukb-saige-153	SIRPG++SIRPG_NA_SIRPG	Wald ratio	1	-0.178336	0.14531	0.21972	-0.463144	0.106473	0.836662	0.629302	1.11235	0.93463
12399_CCDC50	ukb-saige-153	Colorectal cancer || id:ukb-saige-153	CCDC50++CCD50_NA_CCD50	Wald ratio	1	-0.545113	0.451128	0.226919	-1.42932	0.339098	0.579776	0.239471	1.40368	0.949215
18307_PPA2	ukb-saige-153	Colorectal cancer || id:ukb-saige-153	PPA2++PPase_2	Wald ratio	1	0.28463	0.237192	0.230139	-0.180266	0.749526	1.32927	0.835048	2.116	0.949215
18922_CD68	ukb-saige-153	Colorectal cancer || id:ukb-saige-153	CD68++CD68_NA_CD68	Wald ratio	1	0.581058	0.482278	0.228273	-0.364207	1.52632	1.78793	0.694747	4.60122	0.949215
3866_SBDS	ukb-saige-153	Colorectal cancer || id:ukb-saige-153	SBDS++SBDS_NA_SBDS	Wald ratio	1	0.21519	0.18038	0.232876	-0.138354	0.568734	1.2401	0.87079	1.76603	0.949215
5900_HINT1	ukb-saige-153	Colorectal cancer || id:ukb-saige-153	HINT1++HINT1_NA_HINT1	Wald ratio	1	0.319588	0.268041	0.233141	-0.205773	0.844948	1.37656	0.814018	2.32786	0.949215
9848_CCNH	ukb-saige-153	Colorectal cancer || id:ukb-saige-153	CCNH++Cyclin_H	Wald ratio	1	-0.321911	0.26999	0.233141	-0.85109	0.207269	0.724763	0.426949	1.23031	0.949215
10042_SGK3	ukb-saige-153	Colorectal cancer || id:ukb-saige-153	SGK3++SGK3_NA_SGK3	Wald ratio	1	0.280579	0.416484	0.500512	-0.53573	1.09689	1.3239	0.585242	2.99483	0.95061
10346_STAT3	ukb-saige-153	Colorectal cancer || id:ukb-saige-153	STAT3++STAT3_NA_STAT3	Wald ratio	1	-0.149254	0.142764	0.295813	-0.429072	0.130565	0.861351	0.651113	1.13947	0.95061
10396_MCL1	ukb-saige-153	Colorectal cancer || id:ukb-saige-153	MCL1++Mcl_1	Wald ratio	1	-0.0887069	0.0955305	0.353111	-0.275947	0.0985329	0.915114	0.758853	1.10355	0.95061
10499_TMEM106A	ukb-saige-153	Colorectal cancer || id:ukb-saige-153	TMEM106A++T106A_NA_T106A	Wald ratio	1	0.169492	0.372881	0.649436	-0.561356	0.900339	1.1847	0.570435	2.46044	0.95061
10514_PTGDS	ukb-saige-153	Colorectal cancer || id:ukb-saige-153	PTGDS++PGD2_synthase	Wald ratio	1	-0.106383	0.148936	0.475051	-0.398298	0.185532	0.89908	0.671462	1.20386	0.95061
10534_PARP1	ukb-saige-153	Colorectal cancer || id:ukb-saige-153	PARP1++PARP_NA_PARP	Wald ratio	1	0.350584	0.48414	0.468981	-0.598331	1.2995	1.4199	0.549729	3.66746	0.95061
10554_GLB1	ukb-saige-153	Colorectal cancer || id:ukb-saige-153	GLB1++BGAL_NA_BGAL	Wald ratio	1	0.536913	0.49217	0.275313	-0.42774	1.50157	1.71072	0.651981	4.48871	0.95061
10561_PGLYRP3	ukb-saige-153	Colorectal cancer || id:ukb-saige-153	PGLYRP3++PGRP_I_alpha	Wald ratio	1	0.250696	0.473538	0.59652	-0.677437	1.17883	1.28492	0.507917	3.25057	0.95061
10571_MGAT1	ukb-saige-153	Colorectal cancer || id:ukb-saige-153	MGAT1++MGAT1_NA_MGAT1	Wald ratio	1	-0.270701	0.382166	0.478738	-1.01975	0.478344	0.762845	0.360687	1.6134	0.95061
10708_GNRH2	ukb-saige-153	Colorectal cancer || id:ukb-saige-153	GNRH2++GON2_NA_GON2	Wald ratio	1	-0.163286	0.148441	0.271332	-0.454231	0.12766	0.849349	0.634936	1.13617	0.95061
10737_SERPINB1	ukb-saige-153	Colorectal cancer || id:ukb-saige-153	SERPINB1++Serpin_B1	Wald ratio	1	0.30303	0.277778	0.275313	-0.241414	0.847475	1.35396	0.785516	2.33375	0.95061
10908_GALNT13	ukb-saige-153	Colorectal cancer || id:ukb-saige-153	GALNT13++GLT13_NA_GLT13	Wald ratio	1	-0.203922	0.368627	0.580132	-0.926431	0.518588	0.815526	0.395964	1.67965	0.95061
10924_CYB5D2	ukb-saige-153	Colorectal cancer || id:ukb-saige-153	CYB5D2++NEUFC_NA_NEUFC	Wald ratio	1	0.104182	0.111417	0.349755	-0.114195	0.322558	1.1098	0.892084	1.38066	0.95061
10948_PLD3	ukb-saige-153	Colorectal cancer || id:ukb-saige-153	PLD3++PLD3_NA_PLD3	Wald ratio	1	0.251108	0.406204	0.536455	-0.545052	1.04727	1.28545	0.579812	2.84985	0.95061
11287_CYB5A	ukb-saige-153	Colorectal cancer || id:ukb-saige-153	CYB5A++Cytochrome_b5	Wald ratio	1	0.128205	0.276134	0.642443	-0.413018	0.669428	1.13679	0.661651	1.95312	0.95061
11302_TNR	ukb-saige-153	Colorectal cancer || id:ukb-saige-153	TNR++TENR_NA_TENR	Wald ratio	1	0.0836502	0.1673	0.617075	-0.244259	0.411559	1.08725	0.783285	1.50917	0.95061
11333_ARHGAP25	ukb-saige-153	Colorectal cancer || id:ukb-saige-153	ARHGAP25++RHG25_NA_RHG25	Wald ratio	1	-0.109447	0.144009	0.447255	-0.391705	0.172811	0.89633	0.675903	1.18864	0.95061
11387_ATF6B	ukb-saige-153	Colorectal cancer || id:ukb-saige-153	ATF6B++ATF6B_NA_ATF6B	Wald ratio	1	-0.147411	0.20269	0.467059	-0.544684	0.249862	0.862939	0.580025	1.28385	0.95061
11480_ALDH3A1	ukb-saige-153	Colorectal cancer || id:ukb-saige-153	ALDH3A1++Aldehyde_dehydrogenase__class_3	Wald ratio	1	-0.142068	0.181531	0.433857	-0.497869	0.213733	0.867562	0.607825	1.23829	0.95061
11493_DYNLL2	ukb-saige-153	Colorectal cancer || id:ukb-saige-153	DYNLL2++DYL2_NA_DYL2	Wald ratio	1	0.235081	0.39783	0.554581	-0.544665	1.01483	1.26501	0.580036	2.75889	0.95061
11540_FOXO3	ukb-saige-153	Colorectal cancer || id:ukb-saige-153	FOXO3++FOXO3A_NA_FOXO3A	Wald ratio	1	-0.283912	0.425868	0.504985	-1.11861	0.550789	0.752833	0.326733	1.73462	0.95061
11606_DNAJB6	ukb-saige-153	Colorectal cancer || id:ukb-saige-153	DNAJB6++DNJB6_NA_DNJB6	Wald ratio	1	-0.333333	0.431373	0.439684	-1.17882	0.512157	0.716531	0.30764	1.66889	0.95061
11616_HSF1	ukb-saige-153	Colorectal cancer || id:ukb-saige-153	HSF1++HSF1_NA_HSF1	Wald ratio	1	-0.375587	0.344288	0.275313	-1.05039	0.299218	0.686886	0.349801	1.3488	0.95061
11636_TAGLN2	ukb-saige-153	Colorectal cancer || id:ukb-saige-153	TAGLN2++Transgelin_2	Wald ratio	1	-0.202775	0.234792	0.387788	-0.662967	0.257417	0.816462	0.51532	1.29358	0.95061
11643_DTX3L	ukb-saige-153	Colorectal cancer || id:ukb-saige-153	DTX3L++DTX3L_NA_DTX3L	Wald ratio	1	-0.446561	0.38702	0.248563	-1.20512	0.311998	0.639824	0.299656	1.36615	0.95061
11659_CLINT1	ukb-saige-153	Colorectal cancer || id:ukb-saige-153	CLINT1++EPN4_NA_EPN4	Wald ratio	1	-0.184211	0.394737	0.640738	-0.957895	0.589474	0.831761	0.3837	1.80304	0.95061
11708_LCN1	ukb-saige-153	Colorectal cancer || id:ukb-saige-153	LCN1++LCN1_NA_LCN1	Wald ratio	1	0.163577	0.316249	0.604988	-0.45627	0.783424	1.17772	0.633642	2.18895	0.95061
12343_ACAP2	ukb-saige-153	Colorectal cancer || id:ukb-saige-153	ACAP2++CENB2_NA_CENB2	Wald ratio	1	0.325342	0.428082	0.447255	-0.513699	1.16438	1.3845	0.598279	3.20395	0.95061
12356_SRI	ukb-saige-153	Colorectal cancer || id:ukb-saige-153	SRI++Sorcin_NA_Sorcin	Wald ratio	1	0.103781	0.200148	0.604097	-0.28851	0.496071	1.10936	0.749379	1.64226	0.95061
12361_RRAS2	ukb-saige-153	Colorectal cancer || id:ukb-saige-153	RRAS2++RRAS2_NA_RRAS2	Wald ratio	1	0.5118	0.952516	0.591051	-1.35513	2.37873	1.66829	0.257913	10.7912	0.95061
12366_CRYGD	ukb-saige-153	Colorectal cancer || id:ukb-saige-153	CRYGD++CRGD_NA_CRGD	Wald ratio	1	0.223176	0.197425	0.258293	-0.163777	0.610129	1.25004	0.848931	1.84067	0.95061
12387_PDLIM4	ukb-saige-153	Colorectal cancer || id:ukb-saige-153	PDLIM4++PDLI4_NA_PDLI4	Wald ratio	1	-0.13905	0.142912	0.330567	-0.419158	0.141058	0.870185	0.6576	1.15149	0.95061
12395_DARS2	ukb-saige-153	Colorectal cancer || id:ukb-saige-153	DARS2++SYDM_NA_SYDM	Wald ratio	1	-0.117994	0.24863	0.635089	-0.60531	0.369322	0.888701	0.545905	1.44675	0.95061
12411_MAX	ukb-saige-153	Colorectal cancer || id:ukb-saige-153	MAX++MAX_NA_MAX	Wald ratio	1	0.0668896	0.122631	0.585441	-0.173467	0.307246	1.06918	0.840745	1.35968	0.95061
12422_ALOX15B	ukb-saige-153	Colorectal cancer || id:ukb-saige-153	ALOX15B++LX15B_NA_LX15B	Wald ratio	1	0.364372	0.310391	0.24043	-0.243995	0.97274	1.43961	0.783492	2.64518	0.95061
12424_THYN1	ukb-saige-153	Colorectal cancer || id:ukb-saige-153	THYN1++THYN1_NA_THYN1	Wald ratio	1	0.494418	0.446571	0.268232	-0.380861	1.3697	1.63954	0.683273	3.93416	0.95061
12431_PELO	ukb-saige-153	Colorectal cancer || id:ukb-saige-153	PELO++PELO_NA_PELO	Wald ratio	1	-0.329114	0.493671	0.504985	-1.29671	0.638481	0.719561	0.27343	1.8936	0.95061
12437_ULK3	ukb-saige-153	Colorectal cancer || id:ukb-saige-153	ULK3++ULK3_NA_ULK3	Wald ratio	1	0.241657	0.27618	0.381574	-0.299655	0.782969	1.27336	0.741074	2.18796	0.95061
12438_MPG	ukb-saige-153	Colorectal cancer || id:ukb-saige-153	MPG++3MG_NA_3MG	Wald ratio	1	-0.266904	0.391459	0.495354	-1.03416	0.500356	0.765747	0.355524	1.64931	0.95061
12445_ANKRD27	ukb-saige-153	Colorectal cancer || id:ukb-saige-153	ANKRD27++ANR27_NA_ANR27	Wald ratio	1	-0.287356	0.421456	0.495354	-1.11341	0.538697	0.750244	0.328437	1.71377	0.95061
12457_ADI1	ukb-saige-153	Colorectal cancer || id:ukb-saige-153	ADI1++MTND_NA_MTND	Wald ratio	1	0.135501	0.280036	0.628477	-0.413369	0.684372	1.14511	0.661418	1.98253	0.95061
12494_GABARAPL2	ukb-saige-153	Colorectal cancer || id:ukb-saige-153	GABARAPL2++GBRL2_NA_GBRL2	Wald ratio	1	-0.175976	0.298393	0.555363	-0.760826	0.408875	0.838639	0.46728	1.50512	0.95061
12556_UBE2C	ukb-saige-153	Colorectal cancer || id:ukb-saige-153	UBE2C++UBE2C_NA_UBE2C	Wald ratio	1	0.138182	0.16	0.387788	-0.175418	0.451782	1.14818	0.839106	1.57111	0.95061
12573_TRIM3	ukb-saige-153	Colorectal cancer || id:ukb-saige-153	TRIM3++TRIM3_NA_TRIM3	Wald ratio	1	0.100575	0.201149	0.617075	-0.293678	0.494828	1.10581	0.745516	1.64022	0.95061
12616_NRBP1	ukb-saige-153	Colorectal cancer || id:ukb-saige-153	NRBP1++NRBP_NA_NRBP	Wald ratio	1	0.336449	0.46729	0.471525	-0.579439	1.25234	1.39997	0.560212	3.49851	0.95061
12641_INPP5B	ukb-saige-153	Colorectal cancer || id:ukb-saige-153	INPP5B++I5P2_NA_I5P2	Wald ratio	1	0.237226	0.437956	0.588048	-0.621168	1.09562	1.26773	0.537317	2.99104	0.95061
12643_ARRB1	ukb-saige-153	Colorectal cancer || id:ukb-saige-153	ARRB1++ARRB1_NA_ARRB1	Wald ratio	1	0.26087	0.285714	0.36122	-0.29913	0.82087	1.29806	0.741463	2.27248	0.95061
12685_HOMER2	ukb-saige-153	Colorectal cancer || id:ukb-saige-153	HOMER2++HOME2_NA_HOME2	Wald ratio	1	0.219058	0.317634	0.490411	-0.403505	0.841621	1.2449	0.667975	2.32012	0.95061
12697_PIP4K2A	ukb-saige-153	Colorectal cancer || id:ukb-saige-153	PIP4K2A++PI42A_NA_PI42A	Wald ratio	1	-0.184591	0.192616	0.337895	-0.562119	0.192937	0.831445	0.57	1.21281	0.95061
12703_NEK7	ukb-saige-153	Colorectal cancer || id:ukb-saige-153	NEK7++NEK7_NA_NEK7	Wald ratio	1	-0.216479	0.220897	0.327086	-0.649437	0.216479	0.80535	0.52234	1.2417	0.95061
12799_DNAJC27	ukb-saige-153	Colorectal cancer || id:ukb-saige-153	DNAJC27++DJC27_NA_DJC27	Wald ratio	1	-0.488889	0.503704	0.331753	-1.47615	0.49837	0.613307	0.228516	1.64604	0.95061
12813_EHBP1	ukb-saige-153	Colorectal cancer || id:ukb-saige-153	EHBP1++EHBP1_NA_EHBP1	Wald ratio	1	-0.264624	0.473538	0.576282	-1.19276	0.66351	0.767495	0.303383	1.94159	0.95061
12855_CASS4	ukb-saige-153	Colorectal cancer || id:ukb-saige-153	CASS4++CT032_NA_CT032	Wald ratio	1	-0.171429	0.390476	0.660644	-0.936762	0.593905	0.84246	0.391895	1.81105	0.95061
12893_IFI16	ukb-saige-153	Colorectal cancer || id:ukb-saige-153	IFI16++IP16_NA_IP16	Wald ratio	1	-0.321168	0.408759	0.432035	-1.12234	0.48	0.725301	0.325519	1.61607	0.95061
12990_MAP3K3	ukb-saige-153	Colorectal cancer || id:ukb-saige-153	MAP3K3++MAP3K3_NA_MAP3K3	Wald ratio	1	-0.208729	0.455408	0.646713	-1.10133	0.683871	0.811615	0.332429	1.98153	0.95061
13044_TSG101	ukb-saige-153	Colorectal cancer || id:ukb-saige-153	TSG101++TS101_NA_TS101	Wald ratio	1	-0.101833	0.156144	0.514289	-0.407875	0.204209	0.90318	0.665062	1.22655	0.95061
13062_GMFG	ukb-saige-153	Colorectal cancer || id:ukb-saige-153	GMFG++GMFG_NA_GMFG	Wald ratio	1	-0.792976	0.906259	0.381574	-2.56924	0.983291	0.452496	0.0765934	2.67324	0.95061
13112_FSTL1	ukb-saige-153	Colorectal cancer || id:ukb-saige-153	FSTL1++FSTL1_NA_FSTL1	Wald ratio	1	0.0656934	0.145985	0.65271	-0.220438	0.351825	1.0679	0.802167	1.42166	0.95061
13449_SF3B4	ukb-saige-153	Colorectal cancer || id:ukb-saige-153	SF3B4++SF3B4_NA_SF3B4	Wald ratio	1	-0.399088	0.478905	0.404657	-1.33774	0.539567	0.670932	0.262438	1.71526	0.95061
13460_CHAD	ukb-saige-153	Colorectal cancer || id:ukb-saige-153	CHAD++CHAD_NA_CHAD	Wald ratio	1	0.427184	0.446602	0.338809	-0.448155	1.30252	1.53294	0.638805	3.67857	0.95061
13465_RCAN1	ukb-saige-153	Colorectal cancer || id:ukb-saige-153	RCAN1++CCP1_NA_CCP1	Wald ratio	1	0.294118	0.358456	0.411924	-0.408456	0.996691	1.34194	0.664676	2.7093	0.95061
13578_ABLIM3	ukb-saige-153	Colorectal cancer || id:ukb-saige-153	ABLIM3++ABLM3_NA_ABLM3	Wald ratio	1	0.106383	0.198092	0.591242	-0.281878	0.494644	1.11225	0.754366	1.63991	0.95061
13580_UAP1	ukb-saige-153	Colorectal cancer || id:ukb-saige-153	UAP1++Sperm_associated_antigen_2	Wald ratio	1	-0.375335	0.482574	0.4367	-1.32118	0.570509	0.687059	0.26682	1.76917	0.95061
13603_RFESD	ukb-saige-153	Colorectal cancer || id:ukb-saige-153	RFESD++RFESD_NA_RFESD	Wald ratio	1	-0.298693	0.33603	0.374063	-0.957312	0.359925	0.741787	0.383924	1.43322	0.95061
13632_ZYX	ukb-saige-153	Colorectal cancer || id:ukb-saige-153	ZYX++Zyxin_NA_Zyxin	Wald ratio	1	-0.139417	0.304183	0.646713	-0.735615	0.456781	0.869865	0.479211	1.57898	0.95061
13642_IFIT3	ukb-saige-153	Colorectal cancer || id:ukb-saige-153	IFIT3++CIG49_NA_CIG49	Wald ratio	1	-0.298673	0.276549	0.280142	-0.840708	0.243363	0.741802	0.431405	1.27553	0.95061
13657_PNKP	ukb-saige-153	Colorectal cancer || id:ukb-saige-153	PNKP++PNKP_NA_PNKP	Wald ratio	1	-0.218471	0.218471	0.317311	-0.646673	0.209732	0.803747	0.523785	1.23335	0.95061
13719_PAK4	ukb-saige-153	Colorectal cancer || id:ukb-saige-153	PAK4++PAK4_NA_PAK4	Wald ratio	1	-0.466102	0.466102	0.317311	-1.37966	0.447458	0.627443	0.251664	1.56433	0.95061
13940_IFI16	ukb-saige-153	Colorectal cancer || id:ukb-saige-153	IFI16++IP16_NA_IP16	Wald ratio	1	-0.263447	0.296378	0.374063	-0.844347	0.317453	0.768399	0.429838	1.37363	0.95061
13954_GNPNAT1	ukb-saige-153	Colorectal cancer || id:ukb-saige-153	GNPNAT1++GNA1_NA_GNA1	Wald ratio	1	-0.351377	0.360874	0.330213	-1.05869	0.355935	0.703718	0.34691	1.42752	0.95061
13982_RGS18	ukb-saige-153	Colorectal cancer || id:ukb-saige-153	RGS18++RGS18_NA_RGS18	Wald ratio	1	-0.328467	0.383212	0.391366	-1.07956	0.422628	0.720027	0.339744	1.52597	0.95061
14009_TNFAIP3	ukb-saige-153	Colorectal cancer || id:ukb-saige-153	TNFAIP3++TNFAIP3_NA_TNFAIP3	Wald ratio	1	0.142786	0.147796	0.333993	-0.146894	0.432465	1.15348	0.863386	1.54105	0.95061
[truncated: 3,841 more rows]
