# Supplementary material for: Associations of plasma protein levels with risk of colorectal cancer: a proteome-wide Mendelian randomization study
Source: Research Square preprint supplement (doi:10.21203/rs.3.rs-6304313/v1), 2025-05-05
Supplement: Supplementary file 3 [file a2dce8fb29cb73200062da7f.xlsx]

## Sheet: 排序
id.exposure	id.outcome	outcome	method	nsnp	b	se	pval	lo_ci	up_ci	or	or_lci95	or_uci95	p_fdr	exposure
CHRDL2	ukb-saige-208	Benign neoplasm of colon || id:ukb-saige-208	Inverse variance weighted	5	0.236766	0.0348958	1.16135e-11	0.16837	0.305162	1.26714	1.18337	1.35684	1.8059e-08	exposure
CHRDL2	ukb-saige-159	Malignant neoplasm of other and ill-defined sites within the digestive organs and peritoneum || id:ukb-saige-159	Inverse variance weighted	5	0.324673	0.0640962	4.0755e-07	0.199044	0.450301	1.38358	1.22024	1.56878	0.00031687	exposure
CHRDL2	ukb-saige-562	Diverticulosis and diverticulitis || id:ukb-saige-562	Inverse variance weighted	5	0.150705	0.0307034	9.18119e-07	0.0905265	0.210884	1.16265	1.09475	1.23477	0.000418395	exposure
CHRDL2	ukb-saige-562.1	Diverticulosis || id:ukb-saige-562.1	Inverse variance weighted	5	0.149745	0.0307034	1.07626e-06	0.0895665	0.209924	1.16154	1.0937	1.23358	0.000418395	exposure
CHRDL2	ukb-saige-153	Colorectal cancer || id:ukb-saige-153	Inverse variance weighted	5	0.328242	0.0707449	3.48752e-06	0.189582	0.466902	1.38853	1.20874	1.59505	0.00108462	exposure
CHRDL2	ukb-saige-153.3	Malignant neoplasm of rectum, rectosigmoid junction, and anus || id:ukb-saige-153.3	Inverse variance weighted	5	0.407572	0.106909	0.000137653	0.198032	0.617113	1.50316	1.219	1.85357	0.0305787	exposure
DKKL1	ukb-saige-159	Malignant neoplasm of other and ill-defined sites within the digestive organs and peritoneum || id:ukb-saige-159	Inverse variance weighted	2	0.0788723	0.0179663	1.13345e-05	0.0436583	0.114086	1.08207	1.04463	1.12085	0.00293752	exposure
DKKL1	ukb-saige-153.2	Colon cancer || id:ukb-saige-153.2	Inverse variance weighted	2	0.0920489	0.0245548	0.00017775	0.0439214	0.140176	1.09642	1.0449	1.15048	0.0345502	exposure
DKKL1	ukb-saige-153	Colorectal cancer || id:ukb-saige-153	Inverse variance weighted	2	0.0738137	0.019853	0.000200794	0.0349019	0.112726	1.07661	1.03552	1.11932	0.0346927	exposure
TMEM132A	ukb-saige-198.2	Secondary malignancy of respiratory organs || id:ukb-saige-198.2	Wald ratio	1	-0.270116	0.0558239	1.30685e-06	-0.37953	-0.160701	0.763291	0.684183	0.851547	0.000339345	exposure
TMEM132A	ukb-saige-153.3	Malignant neoplasm of rectum, rectosigmoid junction, and anus || id:ukb-saige-153.3	Wald ratio	1	-0.2341	0.0576246	4.85499e-05	-0.347044	-0.121156	0.791283	0.706774	0.885896	0.00840454	exposure
TMEM132A	ukb-saige-153	Colorectal cancer || id:ukb-saige-153	Wald ratio	1	-0.154866	0.0396169	9.26441e-05	-0.232515	-0.077217	0.85653	0.792538	0.925689	0.0136244	exposure
TMEM132A	ukb-saige-159	Malignant neoplasm of other and ill-defined sites within the digestive organs and peritoneum || id:ukb-saige-159	Wald ratio	1	-0.14046	0.0360154	9.61927e-05	-0.21105	-0.0698699	0.868958	0.809733	0.932515	0.0136244	exposure
TMEM132A	ukb-saige-198.3	Secondary malignant neoplasm of digestive systems || id:ukb-saige-198.3	Wald ratio	1	-0.252108	0.0666285	0.000154462	-0.3827	-0.121516	0.777161	0.682018	0.885577	0.0200543	exposure
TMEM132A	ukb-saige-198.4	Secondary malignant neoplasm of liver || id:ukb-saige-198.4	Wald ratio	1	-0.178276	0.0504216	0.000406674	-0.277102	-0.07945	0.836711	0.757977	0.923624	0.045257	exposure
GREM1	ukb-saige-208	Benign neoplasm of colon || id:ukb-saige-208	Wald ratio	1	0.137391	0.0137391	1.52397e-23	0.110463	0.16432	1.14728	1.11679	1.17859	2.37435e-20	exposure
GREM1	ukb-saige-565.1	Anal and rectal polyp || id:ukb-saige-565.1	Wald ratio	1	0.179666	0.022194	5.71525e-16	0.136165	0.223166	1.19682	1.14587	1.25003	4.45218e-13	exposure
GREM1	ukb-saige-565	Anal and rectal conditions || id:ukb-saige-565	Wald ratio	1	0.105686	0.0158529	2.61678e-11	0.0746141	0.136757	1.11147	1.07747	1.14655	1.35898e-08	exposure
GREM1	ukb-saige-153	Colorectal cancer || id:ukb-saige-153	Wald ratio	1	0.169097	0.0285351	3.10543e-09	0.113168	0.225026	1.18424	1.11982	1.25236	1.20956e-06	exposure
GREM1	ukb-saige-153.3	Malignant neoplasm of rectum, rectosigmoid junction, and anus || id:ukb-saige-153.3	Wald ratio	1	0.232508	0.0422743	3.79791e-08	0.149651	0.315366	1.26176	1.16143	1.37076	1.18343e-05	exposure
GREM1	ukb-saige-159	Malignant neoplasm of other and ill-defined sites within the digestive organs and peritoneum || id:ukb-saige-159	Wald ratio	1	0.126823	0.0264214	1.58666e-06	0.0750368	0.178609	1.13522	1.07792	1.19555	0.000353144	exposure
GREM1	ukb-saige-455	Hemorrhoids || id:ukb-saige-455	Wald ratio	1	0.051786	0.0126823	4.43943e-05	0.0269287	0.0766433	1.05315	1.02729	1.07966	0.00840454	exposure
GREM1	ukb-saige-158	Neoplasm of unspecified nature of digestive system || id:ukb-saige-158	Wald ratio	1	0.211371	0.059184	0.000355039	0.0953708	0.327372	1.23537	1.10007	1.38732	0.0425501	exposure
