# Supplementary material for: Associations of plasma protein levels with risk of colorectal cancer: a proteome-wide Mendelian randomization study
Source: Research Square preprint supplement (doi:10.21203/rs.3.rs-6304313/v1), 2025-05-05
Supplement: Supplementary file 4 [file b5d38c712efbf8c2917ba835.xlsx]

## Sheet: Sheet1
Supplementary Table 3: Results of gene co-localization analysis between plasma proteins
Plasma protein	PPH0	PPH1	PPH2	PPH3	PPH4	PPH3+PPH4
TMEM132A	9.92919e-20	0.0321409	3.24668e-19	0.104232	0.863627	0.967859
DKKL1	1.19337e-256	0.220229	1.55305e-256	0.286111	0.49366	0.779771
GREM1	4.12435e-74	4.9545e-06	1.26741e-69	0.151403	0.848592	0.999995
CHRDL2	6.34e-245	0.180801	8.08e-245	0.229589	0.58961	0.819199
Footnote: PPH0: Phenotype 1 and phenotype 2 are not significantly associated with all SNP loci in a given genomic region, PPH1: Phenotype 1 is significantly associated with a SNP locus in a genomic region, PPH2: Phenotype 2 is significantly associated with a SNP locus in a genomic region, PPH3: Phenotype 1 and Phenotype 2 are significantly associated with SNP loci in a given genomic region, but a…
